# Supplementary material for: Self-assembly of dilacunary building blocks into high-nuclear [Ln16As16W164O576(OH)8(H2O)42]80−(Ln = EuIII, GdIII, TbIII, DyIII, and HoIII) polyoxotungstates
Source: Royal Society of Chemistry journal article supplement (doi:10.1039/c003489d), 2010-09-14

## *CrystEngComm*

### Supporting Information

#### Self-assembly of lacunary building blocks into high-nuclear

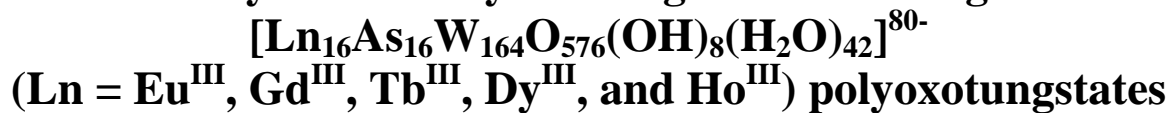

*Firasat Hussain\* and Greta R. Patzke\**

#### Table of Contents

|                      |                                                                                                                           |    |
|----------------------|---------------------------------------------------------------------------------------------------------------------------|----|
| <b>Synthesis S1.</b> | Synthesis, FT-IR and elemental analysis of compounds <b>Eu-1 - Ho-1</b>                                                   | S2 |
| <b>Figure S2.</b>    | FT-IR spectra of compounds <b>Eu-1 – Ho-1</b>                                                                             | S3 |
| <b>Figure S3.</b>    | Thermogravimetric data of compounds <b>Eu-1 – Ho-1</b>                                                                    | S4 |
| <b>Appendix:</b>     | Checkcif report for compound <b>Gd-1</b> generated from <a href="http://checkcif.iucr.org/">http://checkcif.iucr.org/</a> |    |

### Synthetic details S1:

#### Synthesis, FT-IR spectroscopy and elemental analysis of compounds **Eu-1**, **Tb-1**, **Dy-1**, and **Ho-1**.

Synthesis of polyanion **Eu-1**: A sample of  $K_{14}[As_2W_{19}O_{67}(H_2O)]$  (0.526 g (0.10 mmol), synthesized according to Kortz *et al.*<sup>[24c]</sup>) was added under stirring to a solution of 0.086 g (0.20 mmol)  $Eu(NO_3)_3 \cdot 6H_2O$  in 25 mL 1 M NaCl. This solution was heated to 50 °C for 30 minutes and then filtered. Addition of 0.50 mL of 1.0 M CsCl solution to the colorless filtrate leads to instant precipitation which eventually vanishes after the solution was stirred for 10 min. at room temperature. Slow evaporation of this solution at room temperature affords single crystals for further analysis.

FT-IR of **Eu-1**: 1258 (w), 947 (s), 860 (s), 788 (s), 707 (s), 636 (sh), 476 (s)  $cm^{-1}$ . Yield: 19.3% (0.119 g), Elemental analysis (%); calcd. (found): Na 2.5 (2.8), K 0.93 (1.0), Cs 2.6 (3.1), As 2.3 (2.3), W 59.3 (58.2), Eu 4.8 (5.0).

Synthesis of polyanion **Tb-1**: Experimental procedure cf. above,  $Tb(NO_3)_3 \cdot 6H_2O$  (0.087 g, 0.20 mmol) was used instead of  $Gd(NO_3)_3 \cdot 6H_2O$ . FT-IR of **Tb-1**: 1258 (w), 949 (s), 859 (s), 788 (s), 709 (s), 636 (sh), 470 (s)  $cm^{-1}$ . Yield: 26.6% (0.163 g), Elemental analysis (%); calcd. (found): Na 2.5 (2.6), Cs 3.4 (2.6), As 2.3 (2.3), W 59.9 (58.5), Tb 4.9 (5.0).

Synthesis of polyanion **Dy-1**: Experimental procedure cf. above,  $Dy(NO_3)_3 \cdot 6H_2O$  (0.088 g, 0.20 mmol) was used instead of  $Gd(NO_3)_3 \cdot 6H_2O$ . FT-IR of **Dy-1**: 1258 (w), 949 (s), 860 (s), 787 (s), 706 (s), 636 (sh), 477 (s)  $cm^{-1}$ . Yield: 26.2% (0.161 g), Elemental analysis (%); calcd. (found): Na 2.3 (2.2), Cs 3.9 (3.9), As 2.3 (2.3), W 58.6 (57.3), Dy 5.1 (5.2).

Synthesis of polyanion **Ho-1**: Experimental procedure cf. above,  $Ho(NO_3)_3 \cdot 6H_2O$  (0.088 g, 0.20 mmol) was used instead of  $Gd(NO_3)_3 \cdot 6H_2O$ . FT-IR of **Ho-1**: 1258 (w), 948 (s), 861 (s), 788 (s), 709 (s), 632 (sh), 479 (s)  $cm^{-1}$ . Yield: 23.8% (0.146 g), Elemental analysis (%); calcd. (found): Na 2.6 (2.8), Cs 2.4 (2.9), As 2.4 (2.4), W 59.1 (57.7), Ho 5.2 (5.2).

Elemental analyses of all the polyanions were performed by Mikroanalytisches Labor Pascher, Remagen, Germany.

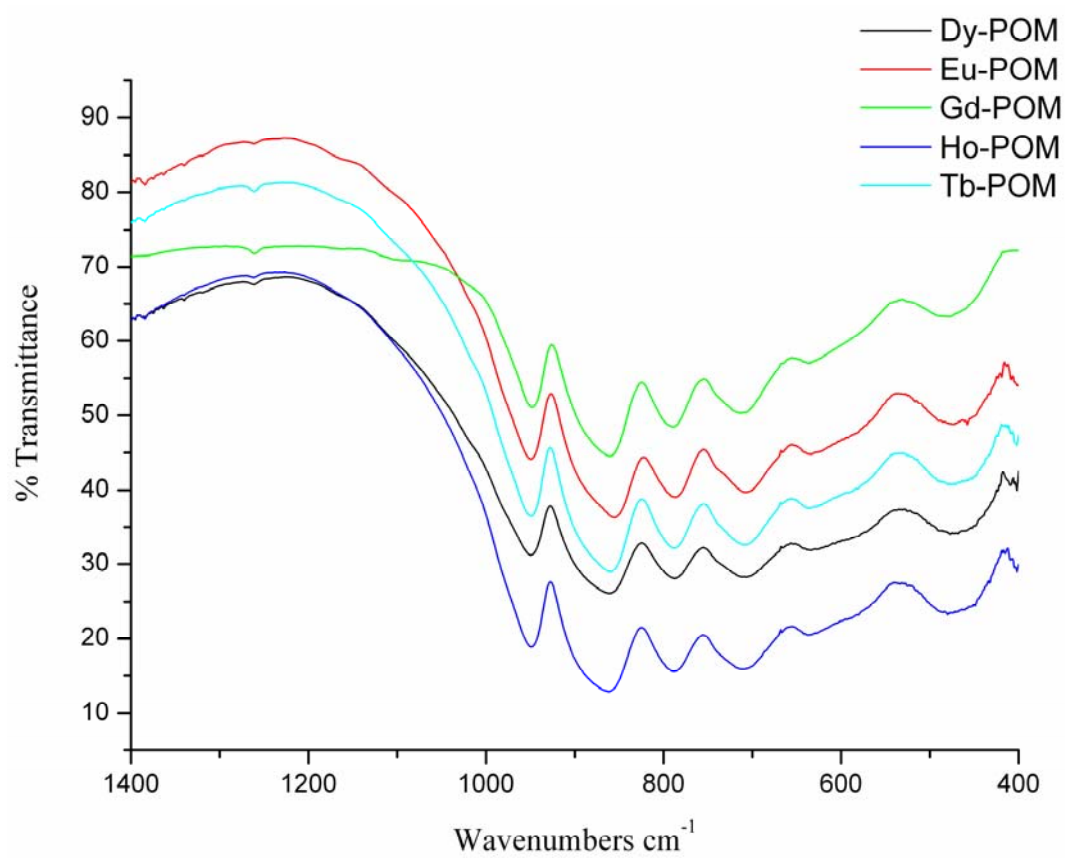

**Figure S2.** FT-IR spectra of compounds **Eu-1** – **Ho-1** (recorded in KBr, only the polyoxometalate “*fingerprint region*” is displayed).

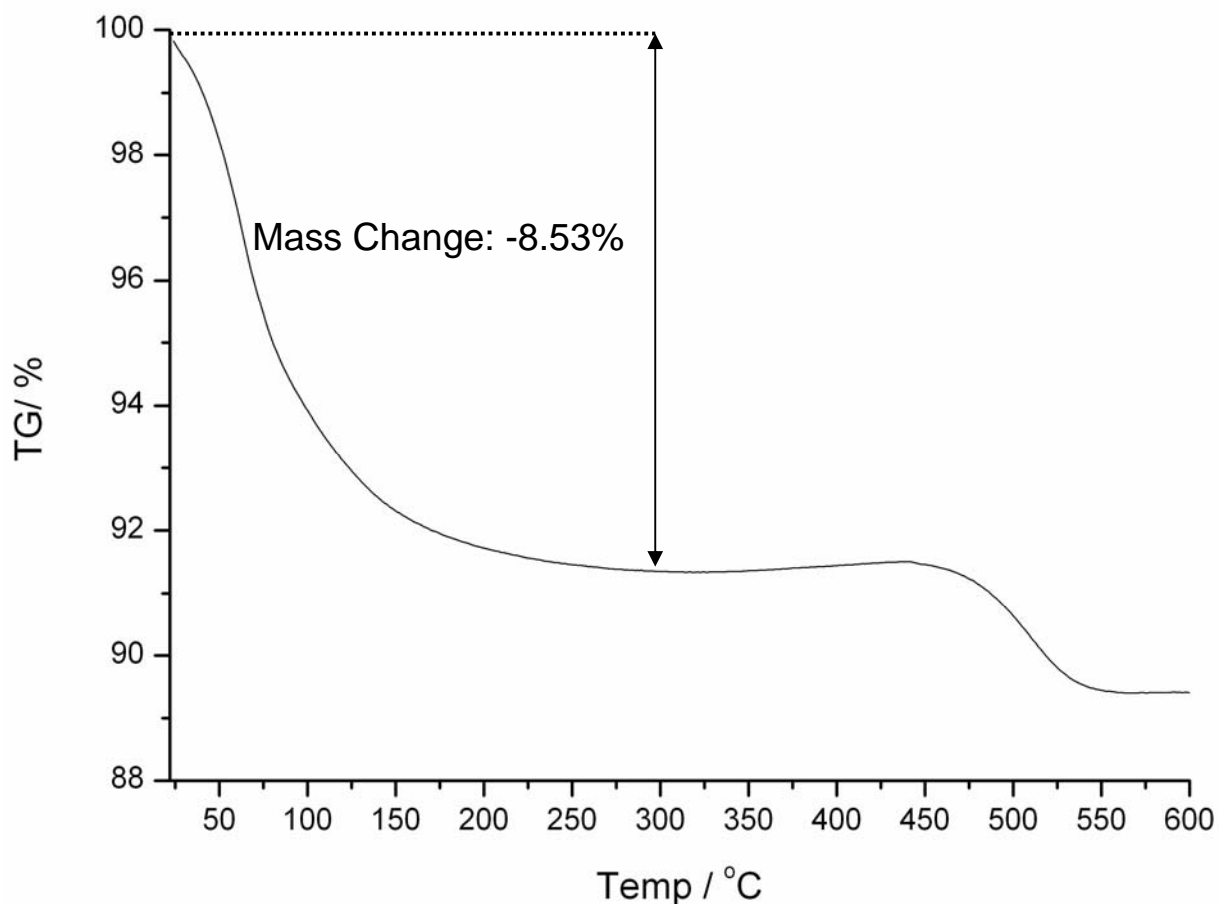

**Figure S3.** Representative thermogravimetric analysis of **Gd-1** displaying the mass loss corresponding to crystal water molecules (**Eu-1** = 9.63 %; **Tb-1** = 8.62 %; **Dy-1** = 8.57 %; **Ho-1** = 8.26 %).

TG measurements were performed on a Netzsch STA 449 C between 25 and 600 °C with a heating rate of 5 K/min in nitrogen atmosphere. The first weight loss corresponds to the crystal water content of the compound. We found that the percentage loss indicates the presence of approx. ~ 220 crystal water molecules in the gadolinium complex and subsequent values in the range of 240 – 210 crystal water molecules were obtained for all other complexes.

## checkCIF/PLATON report

No syntax errors found.    CIF dictionary    Interpreting this report

### Datablock: fh54

---

Bond precision:    Na- O = 0.0700 A                    Wavelength=0.71073

Cell:                    a=21.1358(3)                    b=23.2411(3)                    c=45.1923(6)  
                          alpha=81.399(1)                beta=83.095(1)                gamma=82.393(1)

Temperature:    183 K

|                | Calculated                                                            | Reported                               |
|----------------|-----------------------------------------------------------------------|----------------------------------------|
| Volume         | 21642.0(5)                                                            | 21642.0(5)                             |
| Space group    | P -1                                                                  | P -1                                   |
| Hall group     | -P 1                                                                  | ?                                      |
| Moiety formula | As16 Gd16 O624 W164,<br>2(Cs4.70 K2 Na20 O17),<br>26(O0.50), 2(Cs0.40 | ?                                      |
| Sum formula    | As16 Cs11.20 Gd16 K4 Na40<br>O777 W164                                | As16 Cs11.20 Gd16 K4 Na40<br>O777 W164 |
| Mr             | 48861.06                                                              | 48862.71                               |
| Dx,g cm-3      | 3.749                                                                 | 3.749                                  |
| Z              | 1                                                                     | 1                                      |
| Mu (mm-1)      | 24.108                                                                | 24.108                                 |
| F000           | 21036.0                                                               | 21036.0                                |
| F000'          | 20929.17                                                              |                                        |
| h,k,lmax       | 25,28,55                                                              | 25,28,55                               |
| Nref           | 82205                                                                 | 81725                                  |
| Tmin,Tmax      | 0.088,0.485                                                           | 0.558,1.000                            |
| Tmin'          | 0.056                                                                 |                                        |

Correction method= MULTI-SCAN

Data completeness= 0.994                    Theta(max)= 25.680

R(reflections)= 0.0896( 42782)                wR2(reflections)= 0.1871( 81725)

S = 1.002                                        Npar= 2609

---

The following ALERTS were generated. Each ALERT has the format  
test-name\_ALERT\_alert-type\_alert-level.  
Click on the hyperlinks for more details of the test.

---

 Alert level A

|                                                                   |  |  |  |       |       |
|-------------------------------------------------------------------|--|--|--|-------|-------|
| PLAT202_ALERT_3_A Isotropic non-H Atoms in Anion/Solvent .....    |  |  |  |       | 58    |
| PLAT220_ALERT_2_A Large Non-Solvent    O    Ueq(max)/Ueq(min) ... |  |  |  | 10.00 | Ratio |
| PLAT220_ALERT_2_A Large Non-Solvent    W    Ueq(max)/Ueq(min) ... |  |  |  | 10.00 | Ratio |

|                   |                      |                     |                                  |       |      |
|-------------------|----------------------|---------------------|----------------------------------|-------|------|
| PLAT220_ALERT_2_A | Large Non-Solvent    | Na                  | Ueq (max)/Ueq (min) ...          | 10.00 | Rati |
| PLAT220_ALERT_2_A | Large Non-Solvent    | O                   | Ueq (max)/Ueq (min) ...          | 10.00 | Rati |
| PLAT241_ALERT_2_A | Check High           |                     | Ueq as Compared to Neighbors for |       | W82  |
| PLAT306_ALERT_2_A | Isolated Oxygen Atom | (H-atoms Missing ?) | .....                            | 0377  |      |
| PLAT306_ALERT_2_A | Isolated Oxygen Atom | (H-atoms Missing ?) | .....                            | 0378  |      |
| PLAT306_ALERT_2_A | Isolated Oxygen Atom | (H-atoms Missing ?) | .....                            | 0379  |      |
| PLAT306_ALERT_2_A | Isolated Oxygen Atom | (H-atoms Missing ?) | .....                            | 0380  |      |
| PLAT306_ALERT_2_A | Isolated Oxygen Atom | (H-atoms Missing ?) | .....                            | 0381  |      |
| PLAT306_ALERT_2_A | Isolated Oxygen Atom | (H-atoms Missing ?) | .....                            | 0382  |      |
| PLAT306_ALERT_2_A | Isolated Oxygen Atom | (H-atoms Missing ?) | .....                            | 0383  |      |
| PLAT306_ALERT_2_A | Isolated Oxygen Atom | (H-atoms Missing ?) | .....                            | 0391  |      |
| PLAT306_ALERT_2_A | Isolated Oxygen Atom | (H-atoms Missing ?) | .....                            | 0392  |      |
| PLAT306_ALERT_2_A | Isolated Oxygen Atom | (H-atoms Missing ?) | .....                            | 0393  |      |
| PLAT306_ALERT_2_A | Isolated Oxygen Atom | (H-atoms Missing ?) | .....                            | 0394  |      |
| PLAT306_ALERT_2_A | Isolated Oxygen Atom | (H-atoms Missing ?) | .....                            | 0395  |      |
| PLAT306_ALERT_2_A | Isolated Oxygen Atom | (H-atoms Missing ?) | .....                            | 0396  |      |
| PLAT306_ALERT_2_A | Isolated Oxygen Atom | (H-atoms Missing ?) | .....                            | 0397  |      |
| PLAT306_ALERT_2_A | Isolated Oxygen Atom | (H-atoms Missing ?) | .....                            | 0398  |      |
| PLAT306_ALERT_2_A | Isolated Oxygen Atom | (H-atoms Missing ?) | .....                            | 0399  |      |
| PLAT306_ALERT_2_A | Isolated Oxygen Atom | (H-atoms Missing ?) | .....                            | 0354  |      |
| PLAT306_ALERT_2_A | Isolated Oxygen Atom | (H-atoms Missing ?) | .....                            | 0310  |      |
| PLAT306_ALERT_2_A | Isolated Oxygen Atom | (H-atoms Missing ?) | .....                            | 0311  |      |
| PLAT306_ALERT_2_A | Isolated Oxygen Atom | (H-atoms Missing ?) | .....                            | 0312  |      |
| PLAT306_ALERT_2_A | Isolated Oxygen Atom | (H-atoms Missing ?) | .....                            | 0313  |      |
| PLAT306_ALERT_2_A | Isolated Oxygen Atom | (H-atoms Missing ?) | .....                            | 0314  |      |
| PLAT306_ALERT_2_A | Isolated Oxygen Atom | (H-atoms Missing ?) | .....                            | 0315  |      |
| PLAT306_ALERT_2_A | Isolated Oxygen Atom | (H-atoms Missing ?) | .....                            | 0316  |      |
| PLAT306_ALERT_2_A | Isolated Oxygen Atom | (H-atoms Missing ?) | .....                            | 0317  |      |
| PLAT306_ALERT_2_A | Isolated Oxygen Atom | (H-atoms Missing ?) | .....                            | 0319  |      |
| PLAT306_ALERT_2_A | Isolated Oxygen Atom | (H-atoms Missing ?) | .....                            | 0320  |      |
| PLAT306_ALERT_2_A | Isolated Oxygen Atom | (H-atoms Missing ?) | .....                            | 0321  |      |
| PLAT306_ALERT_2_A | Isolated Oxygen Atom | (H-atoms Missing ?) | .....                            | 0323  |      |
| PLAT306_ALERT_2_A | Isolated Oxygen Atom | (H-atoms Missing ?) | .....                            | 0324  |      |
| PLAT306_ALERT_2_A | Isolated Oxygen Atom | (H-atoms Missing ?) | .....                            | 0325  |      |
| PLAT306_ALERT_2_A | Isolated Oxygen Atom | (H-atoms Missing ?) | .....                            | 0326  |      |
| PLAT306_ALERT_2_A | Isolated Oxygen Atom | (H-atoms Missing ?) | .....                            | 0327  |      |
| PLAT306_ALERT_2_A | Isolated Oxygen Atom | (H-atoms Missing ?) | .....                            | 0328  |      |
| PLAT306_ALERT_2_A | Isolated Oxygen Atom | (H-atoms Missing ?) | .....                            | 0329  |      |
| PLAT306_ALERT_2_A | Isolated Oxygen Atom | (H-atoms Missing ?) | .....                            | 0330  |      |
| PLAT306_ALERT_2_A | Isolated Oxygen Atom | (H-atoms Missing ?) | .....                            | 0331  |      |
| PLAT306_ALERT_2_A | Isolated Oxygen Atom | (H-atoms Missing ?) | .....                            | 0332  |      |
| PLAT306_ALERT_2_A | Isolated Oxygen Atom | (H-atoms Missing ?) | .....                            | 0333  |      |
| PLAT306_ALERT_2_A | Isolated Oxygen Atom | (H-atoms Missing ?) | .....                            | 0335  |      |
| PLAT306_ALERT_2_A | Isolated Oxygen Atom | (H-atoms Missing ?) | .....                            | 0336  |      |
| PLAT306_ALERT_2_A | Isolated Oxygen Atom | (H-atoms Missing ?) | .....                            | 0337  |      |
| PLAT306_ALERT_2_A | Isolated Oxygen Atom | (H-atoms Missing ?) | .....                            | 0338  |      |
| PLAT306_ALERT_2_A | Isolated Oxygen Atom | (H-atoms Missing ?) | .....                            | 0339  |      |
| PLAT306_ALERT_2_A | Isolated Oxygen Atom | (H-atoms Missing ?) | .....                            | 0341  |      |
| PLAT306_ALERT_2_A | Isolated Oxygen Atom | (H-atoms Missing ?) | .....                            | 0343  |      |
| PLAT306_ALERT_2_A | Isolated Oxygen Atom | (H-atoms Missing ?) | .....                            | 0344  |      |
| PLAT306_ALERT_2_A | Isolated Oxygen Atom | (H-atoms Missing ?) | .....                            | 0345  |      |
| PLAT306_ALERT_2_A | Isolated Oxygen Atom | (H-atoms Missing ?) | .....                            | 0346  |      |
| PLAT306_ALERT_2_A | Isolated Oxygen Atom | (H-atoms Missing ?) | .....                            | 0347  |      |
| PLAT306_ALERT_2_A | Isolated Oxygen Atom | (H-atoms Missing ?) | .....                            | 0348  |      |
| PLAT306_ALERT_2_A | Isolated Oxygen Atom | (H-atoms Missing ?) | .....                            | 0349  |      |
| PLAT306_ALERT_2_A | Isolated Oxygen Atom | (H-atoms Missing ?) | .....                            | 0350  |      |
| PLAT306_ALERT_2_A | Isolated Oxygen Atom | (H-atoms Missing ?) | .....                            | 0351  |      |
| PLAT306_ALERT_2_A | Isolated Oxygen Atom | (H-atoms Missing ?) | .....                            | 0352  |      |
| PLAT306_ALERT_2_A | Isolated Oxygen Atom | (H-atoms Missing ?) | .....                            | 0353  |      |
| PLAT306_ALERT_2_A | Isolated Oxygen Atom | (H-atoms Missing ?) | .....                            | 0355  |      |
| PLAT306_ALERT_2_A | Isolated Oxygen Atom | (H-atoms Missing ?) | .....                            | 0356  |      |
| PLAT306_ALERT_2_A | Isolated Oxygen Atom | (H-atoms Missing ?) | .....                            | 0357  |      |

|                   |                                                    |       |      |
|-------------------|----------------------------------------------------|-------|------|
| PLAT306_ALERT_2_A | Isolated Oxygen Atom (H-atoms Missing ?)           | ..... | 0358 |
| PLAT306_ALERT_2_A | Isolated Oxygen Atom (H-atoms Missing ?)           | ..... | 0359 |
| PLAT306_ALERT_2_A | Isolated Oxygen Atom (H-atoms Missing ?)           | ..... | 0364 |
| PLAT306_ALERT_2_A | Isolated Oxygen Atom (H-atoms Missing ?)           | ..... | 0365 |
| PLAT306_ALERT_2_A | Isolated Oxygen Atom (H-atoms Missing ?)           | ..... | 0366 |
| PLAT306_ALERT_2_A | Isolated Oxygen Atom (H-atoms Missing ?)           | ..... | 0367 |
| PLAT306_ALERT_2_A | Isolated Oxygen Atom (H-atoms Missing ?)           | ..... | 0368 |
| PLAT306_ALERT_2_A | Isolated Oxygen Atom (H-atoms Missing ?)           | ..... | 0369 |
| PLAT306_ALERT_2_A | Isolated Oxygen Atom (H-atoms Missing ?)           | ..... | 0370 |
| PLAT306_ALERT_2_A | Isolated Oxygen Atom (H-atoms Missing ?)           | ..... | 0371 |
| PLAT306_ALERT_2_A | Isolated Oxygen Atom (H-atoms Missing ?)           | ..... | 0372 |
| PLAT306_ALERT_2_A | Isolated Oxygen Atom (H-atoms Missing ?)           | ..... | 0374 |
| PLAT306_ALERT_2_A | Isolated Oxygen Atom (H-atoms Missing ?)           | ..... | 0375 |
| PLAT306_ALERT_2_A | Isolated Oxygen Atom (H-atoms Missing ?)           | ..... | 0376 |
| PLAT602_ALERT_2_A | VERY LARGE Solvent Accessible VOID(S) in Structure |       | 1    |

---

**Alert level B**

|                   |                          |                                  |           |
|-------------------|--------------------------|----------------------------------|-----------|
| PLAT241_ALERT_2_B | Check High               | Ueq as Compared to Neighbors for | 0222      |
| PLAT242_ALERT_2_B | Check Low                | Ueq as Compared to Neighbors for | 0265      |
| PLAT242_ALERT_2_B | Check Low                | Ueq as Compared to Neighbors for | 0268      |
| PLAT774_ALERT_1_B | Suspect X-Y Bond in CIF: | NA1 -- NA24 ..                   | 4.09 Ang. |
| PLAT774_ALERT_1_B | Suspect X-Y Bond in CIF: | NA1 -- CS2 ..                    | 4.93 Ang. |
| PLAT774_ALERT_1_B | Suspect X-Y Bond in CIF: | NA4 -- CS1 ..                    | 4.97 Ang. |
| PLAT774_ALERT_1_B | Suspect X-Y Bond in CIF: | NA6 -- NA22 ..                   | 4.04 Ang. |
| PLAT774_ALERT_1_B | Suspect X-Y Bond in CIF: | NA9 -- K4 ..                     | 4.48 Ang. |
| PLAT774_ALERT_1_B | Suspect X-Y Bond in CIF: | NA10 -- CS1 ..                   | 4.38 Ang. |
| PLAT774_ALERT_1_B | Suspect X-Y Bond in CIF: | NA10 -- K4 ..                    | 4.51 Ang. |
| PLAT774_ALERT_1_B | Suspect X-Y Bond in CIF: | CS1 -- W35 ..                    | 4.03 Ang. |
| PLAT774_ALERT_1_B | Suspect X-Y Bond in CIF: | CS1 -- W55 ..                    | 4.08 Ang. |
| PLAT774_ALERT_1_B | Suspect X-Y Bond in CIF: | CS5 -- W22 ..                    | 4.17 Ang. |
| PLAT774_ALERT_1_B | Suspect X-Y Bond in CIF: | CS5 -- W1 ..                     | 4.17 Ang. |
| PLAT774_ALERT_1_B | Suspect X-Y Bond in CIF: | CS5 -- W23 ..                    | 4.18 Ang. |
| PLAT774_ALERT_1_B | Suspect X-Y Bond in CIF: | CS4 -- W13 ..                    | 4.05 Ang. |
| PLAT774_ALERT_1_B | Suspect X-Y Bond in CIF: | CS6 -- W63 ..                    | 4.29 Ang. |
| PLAT774_ALERT_1_B | Suspect X-Y Bond in CIF: | GD6 -- K3 ..                     | 4.12 Ang. |
| PLAT774_ALERT_1_B | Suspect X-Y Bond in CIF: | GD7 -- K3 ..                     | 4.43 Ang. |
| PLAT774_ALERT_1_B | Suspect X-Y Bond in CIF: | W4 -- K4 ..                      | 4.03 Ang. |
| PLAT774_ALERT_1_B | Suspect X-Y Bond in CIF: | W13 -- CS4 ..                    | 4.05 Ang. |
| PLAT774_ALERT_1_B | Suspect X-Y Bond in CIF: | W14 -- CS4 ..                    | 4.14 Ang. |
| PLAT774_ALERT_1_B | Suspect X-Y Bond in CIF: | W22 -- CS5 ..                    | 4.17 Ang. |
| PLAT774_ALERT_1_B | Suspect X-Y Bond in CIF: | W22 -- CS4 ..                    | 4.43 Ang. |
| PLAT774_ALERT_1_B | Suspect X-Y Bond in CIF: | W23 -- CS5 ..                    | 4.18 Ang. |
| PLAT774_ALERT_1_B | Suspect X-Y Bond in CIF: | W26 -- CS7 ..                    | 4.47 Ang. |
| PLAT774_ALERT_1_B | Suspect X-Y Bond in CIF: | W28 -- CS5 ..                    | 4.29 Ang. |
| PLAT774_ALERT_1_B | Suspect X-Y Bond in CIF: | W29 -- CS5 ..                    | 4.40 Ang. |
| PLAT774_ALERT_1_B | Suspect X-Y Bond in CIF: | W65 -- K3 ..                     | 4.03 Ang. |

---

**Alert level C**

|                   |                                                    |                                  |            |
|-------------------|----------------------------------------------------|----------------------------------|------------|
| DIFMN02_ALERT_2_C | The minimum difference density is < -0.1*ZMAX*0.75 |                                  |            |
|                   | _refine_diff_density_min given =                   | -7.204                           |            |
|                   | Test value =                                       | -5.550                           |            |
| DIFMN03_ALERT_1_C | The minimum difference density is < -0.1*ZMAX*0.75 |                                  |            |
|                   | The relevant atom site should be identified.       |                                  |            |
| RINTA01_ALERT_3_C | The value of Rint is greater than 0.12             |                                  |            |
|                   | Rint given                                         | 0.147                            |            |
| PLAT020_ALERT_3_C | The value of Rint is greater than 0.12             | .....                            | 0.15       |
| PLAT098_ALERT_2_C | Large Reported Min. (Negative) Residual Density    |                                  | -7.20 eA-3 |
| PLAT241_ALERT_2_C | Check High                                         | Ueq as Compared to Neighbors for | 062        |
| PLAT241_ALERT_2_C | Check High                                         | Ueq as Compared to Neighbors for | 091        |

|                   |                                                  |                                  |           |
|-------------------|--------------------------------------------------|----------------------------------|-----------|
| PLAT241_ALERT_2_C | Check High                                       | Ueq as Compared to Neighbors for | 0142      |
| PLAT242_ALERT_2_C | Check Low                                        | Ueq as Compared to Neighbors for | 0271      |
| PLAT242_ALERT_2_C | Check Low                                        | Ueq as Compared to Neighbors for | 0272      |
| PLAT077_ALERT_4_C | Unitcell contains non-integer number of atoms .. |                                  | ?         |
| PLAT774_ALERT_1_C | Suspect X-Y Bond in CIF:                         | O50 -- CS7 ..                    | 3.63 Ang. |
| PLAT774_ALERT_1_C | Suspect X-Y Bond in CIF:                         | O71 -- CS7 ..                    | 3.73 Ang. |
| PLAT774_ALERT_1_C | Suspect X-Y Bond in CIF:                         | O72 -- CS2 ..                    | 3.74 Ang. |
| PLAT774_ALERT_1_C | Suspect X-Y Bond in CIF:                         | O76 -- CS2 ..                    | 3.51 Ang. |
| PLAT774_ALERT_1_C | Suspect X-Y Bond in CIF:                         | O91 -- CS2 ..                    | 3.63 Ang. |
| PLAT774_ALERT_1_C | Suspect X-Y Bond in CIF:                         | O110 -- CS4 ..                   | 3.72 Ang. |
| PLAT774_ALERT_1_C | Suspect X-Y Bond in CIF:                         | O111 -- CS2 ..                   | 3.71 Ang. |
| PLAT774_ALERT_1_C | Suspect X-Y Bond in CIF:                         | O161 -- CS3 ..                   | 3.60 Ang. |
| PLAT774_ALERT_1_C | Suspect X-Y Bond in CIF:                         | O179 -- CS2 ..                   | 3.58 Ang. |
| PLAT774_ALERT_1_C | Suspect X-Y Bond in CIF:                         | O309 -- CS6 ..                   | 3.62 Ang. |
| PLAT774_ALERT_1_C | Suspect X-Y Bond in CIF:                         | O359 -- CS2 ..                   | 3.68 Ang. |
| PLAT774_ALERT_1_C | Suspect X-Y Bond in CIF:                         | O378 -- CS2 ..                   | 3.73 Ang. |
| PLAT774_ALERT_1_C | Suspect X-Y Bond in CIF:                         | NA3 -- NA5 ..                    | 3.98 Ang. |
| PLAT774_ALERT_1_C | Suspect X-Y Bond in CIF:                         | NA5 -- NA3 ..                    | 3.98 Ang. |
| PLAT774_ALERT_1_C | Suspect X-Y Bond in CIF:                         | NA6 -- NA23 ..                   | 3.91 Ang. |
| PLAT774_ALERT_1_C | Suspect X-Y Bond in CIF:                         | K3 -- W64 ..                     | 3.72 Ang. |
| PLAT774_ALERT_1_C | Suspect X-Y Bond in CIF:                         | K3 -- W61 ..                     | 3.80 Ang. |
| PLAT774_ALERT_1_C | Suspect X-Y Bond in CIF:                         | K4 -- W5 ..                      | 3.78 Ang. |
| PLAT774_ALERT_1_C | Suspect X-Y Bond in CIF:                         | K4 -- W3 ..                      | 3.87 Ang. |
| PLAT774_ALERT_1_C | Suspect X-Y Bond in CIF:                         | K4 -- W54 ..                     | 3.89 Ang. |
| PLAT774_ALERT_1_C | Suspect X-Y Bond in CIF:                         | K4 -- W2 ..                      | 3.92 Ang. |
| PLAT774_ALERT_1_C | Suspect X-Y Bond in CIF:                         | CS1 -- W54 ..                    | 3.95 Ang. |
| PLAT774_ALERT_1_C | Suspect X-Y Bond in CIF:                         | CS4 -- O110 ..                   | 3.72 Ang. |
| PLAT774_ALERT_1_C | Suspect X-Y Bond in CIF:                         | GD5 -- W41 ..                    | 3.60 Ang. |
| PLAT774_ALERT_1_C | Suspect X-Y Bond in CIF:                         | W2 -- K4 ..                      | 3.92 Ang. |
| PLAT774_ALERT_1_C | Suspect X-Y Bond in CIF:                         | W3 -- K4 ..                      | 3.87 Ang. |
| PLAT774_ALERT_1_C | Suspect X-Y Bond in CIF:                         | W4 -- NA20 ..                    | 3.55 Ang. |
| PLAT774_ALERT_1_C | Suspect X-Y Bond in CIF:                         | W5 -- K4 ..                      | 3.78 Ang. |
| PLAT774_ALERT_1_C | Suspect X-Y Bond in CIF:                         | W32 -- CS7 ..                    | 3.98 Ang. |
| PLAT774_ALERT_1_C | Suspect X-Y Bond in CIF:                         | W33 -- CS7 ..                    | 3.88 Ang. |
| PLAT774_ALERT_1_C | Suspect X-Y Bond in CIF:                         | W61 -- K3 ..                     | 3.80 Ang. |
| PLAT774_ALERT_1_C | Suspect X-Y Bond in CIF:                         | W62 -- K3 ..                     | 3.92 Ang. |
| PLAT774_ALERT_1_C | Suspect X-Y Bond in CIF:                         | W64 -- K3 ..                     | 3.72 Ang. |

---

**Alert level G**

|                   |                                                 |            |
|-------------------|-------------------------------------------------|------------|
| PLAT301_ALERT_3_G | Note: Main Residue Disorder .....               | 0.00 Perc. |
| PLAT154_ALERT_1_G | The su's on the Cell Angles are Equal (x 10000) | 100 Deg.   |
| PLAT302_ALERT_4_G | Note: Anion/Solvent Disorder .....              | 7.00 Perc. |

---

80 ALERT level A = In general: serious problem  
29 ALERT level B = Potentially serious problem  
44 ALERT level C = Check and explain  
3 ALERT level G = General alerts; check

61 ALERT type 1 CIF construction/syntax error, inconsistent or missing data  
89 ALERT type 2 Indicator that the structure model may be wrong or deficient  
4 ALERT type 3 Indicator that the structure quality may be low  
2 ALERT type 4 Improvement, methodology, query or suggestion  
0 ALERT type 5 Informative message, check

---



Publications of your CIF in IUCr journals

A basic structural check has been run on your CIF. These basic checks will be run on all CIFs submitted for publication in IUCr journals (*Acta Crystallographica*, *Journal of Applied Crystallography*, *Journal of Synchrotron Radiation*), however, if you intend to submit to *Acta Crystallographica Section C* or *E*, you should make sure that full publication checks are run on the final version of your CIF prior to submission.

Publications of your CIF in other journals

Please refer to the *Notes for Authors* of the relevant journal for any special instructions relating to CIF submissions.

PLATON version of 20/06/2010; check the version of 20/06/2010

Datablock fh54 - ellipsoid plot

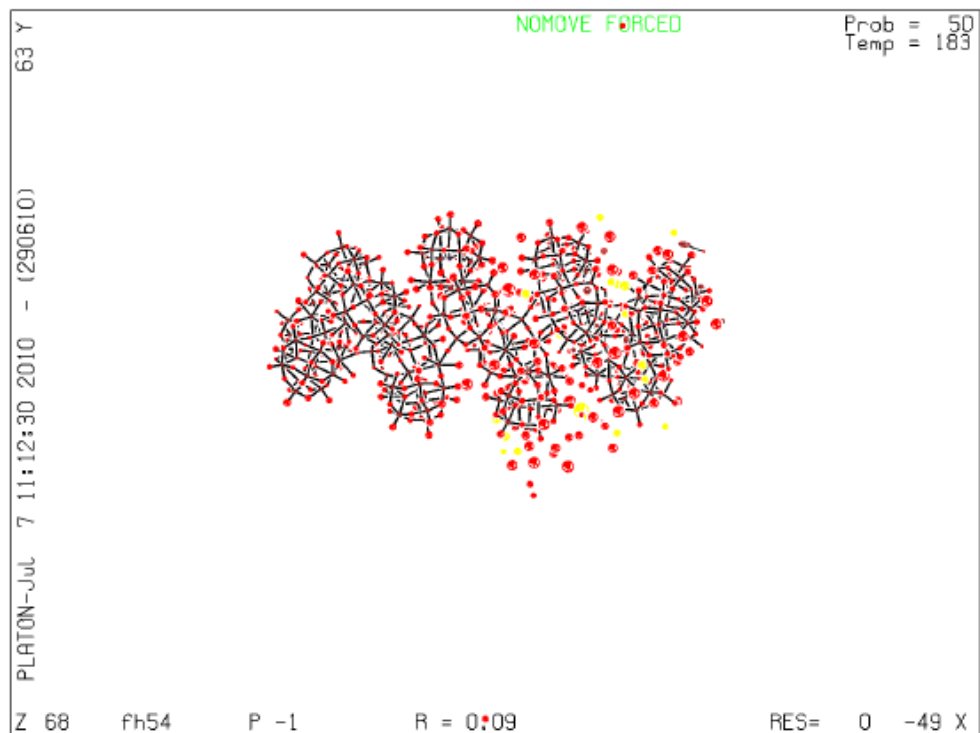

Supplement: c003489d_1.pdf [file c003489d_1.pdf]
