# Supplementary material for: Self-assembly of dilacunary building blocks into high-nuclear [Ln16As16W164O576(OH)8(H2O)42]80−(Ln = EuIII, GdIII, TbIII, DyIII, and HoIII) polyoxotungstates
Source: Royal Society of Chemistry journal article supplement (doi:10.1039/c003489d), 2010-09-14
Supplement: c003489d_2.pdf [file c003489d_2.pdf]

data\_fh48

```
_audit_creation_method          SHELXL-97
_chemical_name_systematic
;
?
;
_chemical_name_common           ?
_chemical_melting_point         ?
_chemical_formula_moiety        ?
_chemical_formula_sum
'As16 Cs10.20 Dy16 K2 Na32 O738 W163.20'
_chemical_formula_weight        47780.60

loop_
  _atom_type_symbol
  _atom_type_description
  _atom_type_scatter_dispersion_real
  _atom_type_scatter_dispersion_imag
  _atom_type_scatter_source
'O' 'O' 0.0106 0.0060
'International Tables Vol C Tables 4.2.6.8 and 6.1.1.4'
'Na' 'Na' 0.0362 0.0249
'International Tables Vol C Tables 4.2.6.8 and 6.1.1.4'
'K' 'K' 0.2009 0.2494
'International Tables Vol C Tables 4.2.6.8 and 6.1.1.4'
'As' 'As' 0.0499 2.0058
'International Tables Vol C Tables 4.2.6.8 and 6.1.1.4'
'Cs' 'Cs' -0.3680 2.1192
'International Tables Vol C Tables 4.2.6.8 and 6.1.1.4'
'Dy' 'Dy' -0.1892 4.4098
'International Tables Vol C Tables 4.2.6.8 and 6.1.1.4'
'W' 'W' -0.8490 6.8722
'International Tables Vol C Tables 4.2.6.8 and 6.1.1.4'

_symmetry_space_group_name_H-M 'P -1'
_symmetry_cell_setting triclinic

loop_
  _symmetry_equiv_pos_as_xyz
  'x, y, z'
  '-x, -y, -z'

_cell_length_a 20.7915(5)
_cell_length_b 23.0951(5)
_cell_length_c 44.5610(9)
_cell_angle_alpha 81.531(2)
_cell_angle_beta 83.973(2)
_cell_angle_gamma 83.112(2)
_cell_volume 20928.0(8)
_cell_formula_units_Z 1
_cell_measurement_temperature 183(2)
_cell_measurement_reflns_used 20054
_cell_measurement_theta_min 2.1970
_cell_measurement_theta_max 29.2898

_exptl_crystal_description block
_exptl_crystal_colour colorless
_exptl_crystal_size_max 0.12
_exptl_crystal_size_mid 0.11
_exptl_crystal_size_min 0.03
_exptl_crystal_density_meas ?
_exptl_crystal_density_diffrn 3.791
```

```
_exptl_crystal_density_method      'not measured'
_exptl_crystal_F_000               20516
_exptl_absorpt_coefficient_mu      24.918
_exptl_absorpt_correction_type     'multi-scan'
_exptl_absorpt_correction_T_min    0.59925
_exptl_absorpt_correction_T_max    1.00000
_exptl_absorpt_process_details
;
CrysAlis RED, Oxford Diffraction Ltd.,
Version 1.171.32.24 (release 21-04-2008 CrysAlis171 .NET)
(compiled Apr 21 2008,18:23:10)
Empirical absorption correction using spherical harmonics,
implemented in SCALE3 ABSPACK scaling algorithm.
;
_exptl_special_details
;
?
;

_diffrn_ambient_temperature        183(2)
_diffrn_radiation_wavelength       0.71073
_diffrn_radiation_type             MoK\alpha
_diffrn_radiation_source           'fine-focus sealed tube'
_diffrn_radiation_monochromator     graphite
_diffrn_measurement_device_type     'Xcalibur Ruby'
_diffrn_measurement_method         '/o oscillation scan'
_diffrn_detector_area_resol_mean   10.4498
_diffrn_standards_number           ?
_diffrn_standards_interval_count   ?
_diffrn_standards_interval_time    ?
_diffrn_standards_decay_%          ?
_diffrn_reflns_number              193712
_diffrn_reflns_av_R_equivalents    0.1575
_diffrn_reflns_av_sigmaI/netI      0.3567
_diffrn_reflns_limit_h_min         -24
_diffrn_reflns_limit_h_max         24
_diffrn_reflns_limit_k_min         -26
_diffrn_reflns_limit_k_max         26
_diffrn_reflns_limit_l_min         -51
_diffrn_reflns_limit_l_max         51
_diffrn_reflns_theta_min           2.20
_diffrn_reflns_theta_max           24.41
_reflns_number_total               68773
_reflns_number_gt                  24731
_reflns_threshold_expression        >2sigma(I)

_computing_data_collection         'CrysAlis RED (Oxford, 2007)'
_computing_cell_refinement         'CrysAlis RED (Oxford, 2007)'
_computing_data_reduction         'CrysAlis RED (Oxford, 2007)'
_computing_structure_solution      'SHELXS-97 (Sheldrick, 1990)'
_computing_structure_refinement    'SHELXL-97 (Sheldrick, 1997)'
_computing_molecular_graphics      'ORTEP-3 (Farrugia, 1997)'
_computing_publication_material    'SHELXL-97 (Sheldrick, 2008)'

_refine_special_details
;
Refinement of F2 against ALL reflections. The weighted R-factor
wR and
goodness of fit S are based on F2, conventional R-factors R are
based
on F, with F set to zero for negative F2. The threshold expression
of
F2 > 2sigma(F2) is used only for calculating R-factors(gt) etc.
and is
```

not relevant to the choice of reflections for refinement. R-factors based

on  $F^2$  are statistically about twice as large as those based on  $F$ , and R-

factors based on ALL data will be even larger.

;

```
_refine_ls_structure_factor_coef Fsqd
_refine_ls_matrix_type full
_refine_ls_weighting_scheme calc
_refine_ls_weighting_details
'calc w=1/[\s^2^(Fo^2^)+(0.0773P)^2^+0.0000P] where P=(Fo^2^+2Fc^2
^)/3'
_atom_sites_solution_primary direct
_atom_sites_solution_secondary difmap
_refine_ls_extinction_method none
_refine_ls_extinction_coef ?
_refine_ls_number_reflns 68773
_refine_ls_number_parameters 2489
_refine_ls_number_restraints 0
_refine_ls_R_factor_all 0.2559
_refine_ls_R_factor_gt 0.0979
_refine_ls_wR_factor_ref 0.2200
_refine_ls_wR_factor_gt 0.1760
_refine_ls_goodness_of_fit_ref 0.910
_refine_ls_restrained_S_all 0.910
_refine_ls_shift/su_max 0.001
_refine_ls_shift/su_mean 0.000
```

loop\_

```
_atom_site_label
_atom_site_type_symbol
_atom_site_fract_x
_atom_site_fract_y
_atom_site_fract_z
_atom_site_U_iso_or_equiv
_atom_site_adp_type
_atom_site_occupancy
_atom_site_symmetry_multiplicity
_atom_site_calc_flag
_atom_site_refinement_flags
_atom_site_disorder_assembly
_atom_site_disorder_group
O1 O 0.6537(19) 0.1805(19) 0.0788(9) 0.076(13) Uiso 1 1 d . . .
O2 O 0.7378(18) 0.0196(19) 0.1472(8) 0.072(12) Uiso 1 1 d . . .
O3 O 0.5964(15) 0.1803(15) 0.1830(7) 0.044(9) Uiso 1 1 d . . .
O4 O 0.4197(16) 0.0359(17) 0.2437(8) 0.059(11) Uiso 1 1 d . . .
O5 O 0.5742(17) -0.1292(18) 0.2119(8) 0.068(12) Uiso 1 1 d . . .
O6 O 0.6321(16) -0.1297(16) 0.0874(7) 0.053(10) Uiso 1 1 d . . .
O7 O 0.5545(16) 0.0324(17) 0.0159(8) 0.057(11) Uiso 1 1 d . . .
O8 O 0.4046(17) 0.2276(18) 0.0515(8) 0.064(11) Uiso 1 1 d . . .
O9 O 0.3387(18) 0.2238(19) 0.1624(8) 0.074(12) Uiso 1 1 d . . .
O10 O 0.6471(14) 0.0730(14) 0.1089(6) 0.034(8) Uiso 1 1 d . . .
O11 O 0.6144(14) 0.0753(14) 0.1684(6) 0.033(8) Uiso 1 1 d . . .
O12 O 0.5649(13) 0.1647(13) 0.1276(6) 0.025(8) Uiso 1 1 d . . .
O13 O 0.5998(16) 0.1008(17) 0.0541(8) 0.057(11) Uiso 1 1 d . . .
O14 O 0.6692(16) -0.0409(17) 0.1155(8) 0.057(11) Uiso 1 1 d . . .
O15 O 0.6341(15) -0.0386(16) 0.1774(7) 0.051(10) Uiso 1 1 d . . .
O16 O 0.5125(16) 0.0993(17) 0.2074(8) 0.058(11) Uiso 1 1 d . . .
O17 O 0.4692(14) 0.1908(15) 0.1673(7) 0.039(9) Uiso 1 1 d . . .
O18 O 0.5194(17) 0.1918(17) 0.0724(8) 0.062(11) Uiso 1 1 d . . .
O19 O 0.4784(16) 0.1225(17) 0.0400(8) 0.058(11) Uiso 1 1 d . . .
O20 O 0.5826(16) -0.0082(16) 0.0734(7) 0.052(10) Uiso 1 1 d . . .
O21 O 0.5926(13) -0.1160(14) 0.1472(6) 0.029(8) Uiso 1 1 d . . .
```

O22 O 0.5159(14) -0.0103(14) 0.2008(6) 0.035(8) Uiso 1 1 d . . . .  
O23 O 0.3859(16) 0.1156(17) 0.1951(7) 0.055(10) Uiso 1 1 d . . . .  
O24 O 0.4250(14) 0.1878(15) 0.1137(7) 0.042(9) Uiso 1 1 d . . . .  
O25 O 0.4760(14) 0.0869(15) 0.1569(7) 0.038(9) Uiso 1 1 d . . . .  
O26 O 0.5529(13) -0.0068(14) 0.1356(6) 0.030(8) Uiso 1 1 d . . . .  
O27 O 0.5041(16) 0.0883(17) 0.0964(7) 0.055(10) Uiso 1 1 d . . . .  
O28 O 0.4597(15) 0.0082(16) 0.0636(7) 0.050(10) Uiso 1 1 d . . . .  
O29 O 0.5080(14) -0.0912(14) 0.1045(6) 0.036(9) Uiso 1 1 d . . . .  
O30 O 0.4737(14) -0.0962(15) 0.1763(7) 0.040(9) Uiso 1 1 d . . . .  
O31 O 0.3890(15) 0.0031(15) 0.1924(7) 0.046(10) Uiso 1 1 d . . . .  
O32 O 0.3501(14) 0.1074(14) 0.1411(6) 0.034(8) Uiso 1 1 d . . . .  
O33 O 0.3687(16) 0.1268(16) 0.0835(7) 0.053(10) Uiso 1 1 d . . . .  
O34 O 0.3519(13) 0.0144(13) 0.1069(6) 0.028(8) Uiso 1 1 d . . . .  
O35 O 0.2402(14) 0.0575(14) 0.1390(6) 0.034(8) Uiso 1 1 d . . . .  
O36 O 0.3407(14) -0.0357(15) 0.0443(7) 0.039(9) Uiso 1 1 d . . . .  
O37 O 0.3814(16) -0.0902(17) 0.1423(8) 0.059(11) Uiso 1 1 d . . . .  
O38 O 0.4610(16) -0.1038(17) 0.0443(8) 0.059(11) Uiso 1 1 d . . . .  
O39 O 0.2472(13) 0.1677(14) 0.1114(6) 0.029(8) Uiso 1 1 d . . . .  
O40 O 0.2595(14) 0.0924(15) 0.0754(7) 0.040(9) Uiso 1 1 d . . . .  
O41 O 0.2127(13) 0.1970(14) 0.0569(6) 0.031(8) Uiso 1 1 d . . . .  
O42 O 0.1413(14) 0.2383(14) 0.1319(6) 0.033(8) Uiso 1 1 d . . . .  
O43 O 0.0070(14) 0.1334(15) 0.1458(7) 0.038(9) Uiso 1 1 d . . . .  
O44 O -0.0203(13) -0.0135(13) 0.1250(6) 0.027(8) Uiso 1 1 d . . . .  
O45 O 0.0819(14) -0.0107(14) 0.0502(6) 0.037(9) Uiso 1 1 d . . . .  
O46 O 0.2388(14) 0.0519(14) 0.0252(6) 0.033(8) Uiso 1 1 d . . . .  
O47 O 0.1449(13) 0.0987(14) 0.0550(6) 0.033(8) Uiso 1 1 d . . . .  
O48 O 0.1059(14) 0.1634(15) 0.0997(7) 0.039(9) Uiso 1 1 d . . . .  
O49 O 0.0428(12) 0.0648(13) 0.0968(6) 0.022(7) Uiso 1 1 d . . . .  
O50 O 0.2354(19) 0.283(2) 0.0920(9) 0.083(13) Uiso 1 1 d . . . .  
O51 O 0.0417(19) 0.216(2) 0.1778(9) 0.084(14) Uiso 1 1 d . . . .  
O52 O 0.1267(16) 0.1224(17) 0.1622(8) 0.060(11) Uiso 1 1 d . . . .  
O53 O 0.0629(15) 0.0261(15) 0.1605(7) 0.046(9) Uiso 1 1 d . . . .  
O54 O -0.0678(17) 0.0482(17) 0.1745(8) 0.061(11) Uiso 1 1 d . . . .  
O55 O 0.0951(13) -0.0605(14) 0.1070(6) 0.032(8) Uiso 1 1 d . . . .  
O56 O -0.0056(17) -0.0895(17) 0.0798(8) 0.061(11) Uiso 1 1 d . . . .  
O57 O 0.1960(13) -0.0183(13) 0.0719(6) 0.027(8) Uiso 1 1 d . . . .  
O58 O 0.1901(15) -0.0455(15) 0.0115(7) 0.042(9) Uiso 1 1 d . . . .  
O59 O 0.3115(16) 0.1464(16) 0.0204(7) 0.052(10) Uiso 1 1 d . . . .  
O60 O 0.1780(14) 0.1555(14) 0.0072(6) 0.035(8) Uiso 1 1 d . . . .  
O61 O 0.1205(14) 0.2688(14) 0.0731(6) 0.035(8) Uiso 1 1 d . . . .  
O62 O 0.0181(15) 0.2423(16) 0.1166(7) 0.051(10) Uiso 1 1 d . . . .  
O63 O -0.0773(15) 0.0921(16) 0.1127(7) 0.049(10) Uiso 1 1 d . . . .  
O64 O -0.0417(13) 0.0245(13) 0.0659(6) 0.024(7) Uiso 1 1 d . . . .  
O65 O 0.1225(12) 0.0657(12) 0.0047(5) 0.017(7) Uiso 1 1 d . . . .  
O66 O 0.0153(14) 0.1175(14) 0.0324(6) 0.034(8) Uiso 1 1 d . . . .  
O67 O -0.0207(15) 0.1837(15) 0.0771(7) 0.045(9) Uiso 1 1 d . . . .  
O68 O 0.0746(13) 0.2089(13) 0.0366(6) 0.025(8) Uiso 1 1 d . . . .  
O69 O -0.1163(16) 0.1334(16) 0.0537(7) 0.054(10) Uiso 1 1 d . . . .  
O70 O 0.0644(15) 0.1799(16) -0.0191(7) 0.048(10) Uiso 1 1 d . . . .  
O71 O -0.0062(15) 0.3044(15) 0.0589(7) 0.043(9) Uiso 1 1 d . . . .  
O72 O 0.2870(14) -0.0852(14) 0.1034(6) 0.034(8) Uiso 1 1 d . . . .  
O73 O 0.1884(13) -0.0366(14) 0.1407(6) 0.029(8) Uiso 1 1 d . . . .  
O74 O 0.1087(16) 0.0528(17) 0.2196(8) 0.061(11) Uiso 1 1 d . . . .  
O75 O 0.2343(19) 0.086(2) 0.1969(9) 0.081(13) Uiso 1 1 d . . . .  
O76 O 0.2679(14) -0.0355(15) 0.1934(7) 0.038(9) Uiso 1 1 d . . . .  
O77 O 0.3921(13) -0.1699(14) 0.0904(6) 0.030(8) Uiso 1 1 d . . . .  
O78 O 0.3214(13) -0.2412(13) 0.0595(6) 0.026(8) Uiso 1 1 d . . . .  
O79 O 0.2252(14) -0.1926(15) 0.0215(7) 0.040(9) Uiso 1 1 d . . . .  
O80 O 0.2075(15) -0.2565(15) 0.0808(7) 0.045(9) Uiso 1 1 d . . . .  
O81 O 0.1845(13) -0.3043(13) 0.0318(6) 0.024(7) Uiso 1 1 d . . . .  
O82 O 0.1512(14) -0.3761(15) 0.0804(7) 0.038(9) Uiso 1 1 d . . . .  
O83 O 0.1350(15) -0.4083(15) 0.0249(7) 0.045(9) Uiso 1 1 d . . . .  
O84 O 0.2257(13) -0.4670(14) 0.0616(6) 0.029(8) Uiso 1 1 d . . . .  
O85 O 0.1689(13) -0.4766(14) 0.1156(6) 0.029(8) Uiso 1 1 d . . . .

O86 O 0.2086 (17) -0.5797 (17) 0.0936 (8) 0.062 (11) Uiso 1 1 d . . . .  
O87 O 0.2810 (14) -0.5407 (14) 0.1374 (6) 0.036 (9) Uiso 1 1 d . . . .  
O88 O 0.2674 (14) -0.4416 (15) 0.1681 (7) 0.039 (9) Uiso 1 1 d . . . .  
O89 O 0.3547 (13) -0.5392 (14) 0.1839 (6) 0.031 (8) Uiso 1 1 d . . . .  
O90 O 0.3916 (13) -0.4296 (14) 0.1498 (6) 0.030 (8) Uiso 1 1 d . . . .  
O91 O 0.3121 (13) -0.3339 (13) 0.1667 (6) 0.024 (7) Uiso 1 1 d . . . .  
O92 O 0.4403 (14) -0.3487 (14) 0.1798 (6) 0.037 (9) Uiso 1 1 d . . . .  
O93 O 0.4034 (14) -0.2642 (14) 0.1338 (6) 0.034 (8) Uiso 1 1 d . . . .  
O94 O 0.4460 (13) -0.2731 (14) 0.0744 (6) 0.030 (8) Uiso 1 1 d . . . .  
O95 O 0.3087 (12) -0.2940 (13) 0.0117 (6) 0.021 (7) Uiso 1 1 d . . . .  
O96 O 0.2666 (14) -0.3949 (15) 0.0126 (7) 0.038 (9) Uiso 1 1 d . . . .  
O97 O 0.3234 (15) -0.5430 (16) 0.0800 (7) 0.050 (10) Uiso 1 1 d . . . .  
O98 O 0.4024 (14) -0.5229 (15) 0.1215 (7) 0.038 (9) Uiso 1 1 d . . . .  
O99 O 0.4727 (14) -0.3607 (15) 0.1188 (7) 0.039 (9) Uiso 1 1 d . . . .  
O100 O 0.3115 (13) -0.4453 (14) 0.1053 (6) 0.028 (8) Uiso 1 1 d . . . .  
O101 O 0.2823 (13) -0.3573 (13) 0.0617 (6) 0.023 (7) Uiso 1 1 d . . . .  
O102 O 0.3605 (12) -0.3363 (13) 0.1028 (6) 0.022 (7) Uiso 1 1 d . . . .  
O103 O 0.3705 (12) -0.4478 (12) 0.0431 (5) 0.014 (7) Uiso 1 1 d . . . .  
O104 O 0.4121 (13) -0.3462 (14) 0.0401 (6) 0.030 (8) Uiso 1 1 d . . . .  
O105 O 0.4467 (13) -0.4358 (14) 0.0816 (6) 0.029 (8) Uiso 1 1 d . . . .  
O106 O 0.4570 (15) -0.5469 (15) 0.0636 (7) 0.043 (9) Uiso 1 1 d . . . .  
O107 O 0.3880 (17) -0.3832 (18) -0.0137 (8) 0.064 (11) Uiso 1 1 d . . . .  
O108 O 0.5395 (16) -0.3589 (17) 0.0611 (8) 0.059 (11) Uiso 1 1 d . . . .  
O109 O 0.1807 (12) -0.1505 (12) 0.1348 (5) 0.015 (7) Uiso 1 1 d . . . .  
O110 O 0.1939 (14) -0.1421 (14) 0.0806 (6) 0.036 (8) Uiso 1 1 d . . . .  
O111 O 0.1864 (13) -0.2699 (14) 0.1463 (6) 0.031 (8) Uiso 1 1 d . . . .  
O112 O 0.2569 (14) -0.4007 (14) 0.2270 (6) 0.035 (8) Uiso 1 1 d . . . .  
O113 O 0.2166 (13) -0.2809 (13) 0.2164 (6) 0.026 (8) Uiso 1 1 d . . . .  
O114 O 0.1546 (13) -0.3801 (14) 0.1458 (6) 0.032 (8) Uiso 1 1 d . . . .  
O115 O 0.1037 (13) -0.3247 (13) 0.2032 (6) 0.023 (7) Uiso 1 1 d . . . .  
O116 O -0.0364 (12) -0.1631 (13) 0.1407 (6) 0.022 (7) Uiso 1 1 d . . . .  
O117 O 0.0477 (12) -0.3366 (13) 0.1179 (6) 0.022 (7) Uiso 1 1 d . . . .  
O118 O 0.0125 (13) -0.2823 (14) 0.1646 (6) 0.030 (8) Uiso 1 1 d . . . .  
O119 O -0.0049 (13) -0.5199 (14) 0.1241 (6) 0.032 (8) Uiso 1 1 d . . . .  
O120 O 0.0922 (12) -0.2119 (12) 0.1142 (6) 0.018 (7) Uiso 1 1 d . . . .  
O121 O 0.0494 (12) -0.2500 (13) 0.0638 (6) 0.020 (7) Uiso 1 1 d . . . .  
O122 O -0.0761 (13) -0.1759 (13) 0.0813 (6) 0.028 (8) Uiso 1 1 d . . . .  
O123 O -0.1154 (13) -0.2556 (13) 0.1378 (6) 0.027 (8) Uiso 1 1 d . . . .  
O124 O -0.0626 (14) -0.3055 (15) 0.0877 (7) 0.040 (9) Uiso 1 1 d . . . .  
O125 O 0.0460 (13) -0.4325 (13) 0.0926 (6) 0.026 (8) Uiso 1 1 d . . . .  
O126 O 0.0567 (13) -0.4528 (14) 0.1496 (6) 0.029 (8) Uiso 1 1 d . . . .  
O127 O -0.0011 (13) -0.3880 (13) 0.2069 (6) 0.025 (8) Uiso 1 1 d . . . .  
O128 O -0.0839 (13) -0.2973 (13) 0.2063 (6) 0.024 (7) Uiso 1 1 d . . . .  
O129 O -0.1866 (14) -0.3029 (14) 0.2506 (6) 0.035 (8) Uiso 1 1 d . . . .  
O130 O -0.1137 (14) -0.4025 (15) 0.2288 (7) 0.040 (9) Uiso 1 1 d . . . .  
O131 O -0.0153 (16) -0.4642 (17) 0.2585 (7) 0.055 (10) Uiso 1 1 d . . . .  
O132 O 0.0272 (14) -0.5046 (15) 0.2066 (7) 0.041 (9) Uiso 1 1 d . . . .  
O133 O 0.0839 (14) -0.5726 (15) 0.1636 (7) 0.039 (9) Uiso 1 1 d . . . .  
O134 O -0.1495 (19) 0.0086 (19) 0.3453 (9) 0.079 (13) Uiso 1 1 d . . . .  
O135 O 0.0148 (15) -0.5131 (15) 0.0593 (7) 0.043 (9) Uiso 1 1 d . . . .  
O136 O -0.0644 (14) -0.4095 (15) 0.0623 (7) 0.038 (9) Uiso 1 1 d . . . .  
O137 O -0.1523 (16) -0.3082 (17) 0.0462 (8) 0.060 (11) Uiso 1 1 d . . . .  
O138 O -0.1869 (13) -0.3184 (13) 0.1098 (6) 0.024 (8) Uiso 1 1 d . . . .  
O139 O -0.2448 (15) -0.2125 (15) 0.1321 (7) 0.043 (9) Uiso 1 1 d . . . .  
O140 O -0.2059 (12) -0.2679 (13) 0.1888 (6) 0.022 (7) Uiso 1 1 d . . . .  
O141 O -0.1554 (13) -0.3611 (13) 0.1688 (6) 0.027 (8) Uiso 1 1 d . . . .  
O142 O -0.0665 (12) -0.4596 (13) 0.1757 (6) 0.022 (7) Uiso 1 1 d . . . .  
O143 O -0.0988 (14) -0.4173 (14) 0.1191 (6) 0.033 (8) Uiso 1 1 d . . . .  
O144 O -0.1011 (17) -0.5060 (17) 0.0911 (8) 0.063 (11) Uiso 1 1 d . . . .  
O145 O -0.1850 (15) -0.4092 (16) 0.0832 (7) 0.050 (10) Uiso 1 1 d . . . .  
O146 O -0.2609 (16) -0.3254 (17) 0.1567 (8) 0.059 (11) Uiso 1 1 d . . . .  
O147 O -0.2357 (16) -0.3679 (17) 0.2144 (7) 0.056 (11) Uiso 1 1 d . . . .  
O148 O -0.0931 (15) -0.5143 (15) 0.2266 (7) 0.045 (9) Uiso 1 1 d . . . .  
O149 O -0.0420 (15) -0.5696 (16) 0.1793 (7) 0.051 (10) Uiso 1 1 d . . . .

O150 O -0.1495(14) -0.5282(14) 0.1488(6) 0.034(8) Uiso 1 1 d . . . .  
O151 O -0.2298(15) -0.4335(15) 0.1432(7) 0.045(9) Uiso 1 1 d . . . .  
O152 O -0.2012(16) -0.4699(16) 0.1967(7) 0.052(10) Uiso 1 1 d . . . .  
O153 O -0.1649(15) -0.5923(15) 0.2050(7) 0.044(9) Uiso 1 1 d . . . .  
O154 O -0.3238(17) -0.4215(17) 0.1867(8) 0.060(11) Uiso 1 1 d . . . .  
O155 O -0.2290(16) -0.5163(17) 0.1052(8) 0.058(11) Uiso 1 1 d . . . .  
O156 O 0.1506(14) -0.4421(14) 0.2047(6) 0.037(9) Uiso 1 1 d . . . .  
O157 O 0.2866(15) -0.2184(15) 0.1112(7) 0.044(9) Uiso 1 1 d . . . .  
O158 O 0.1360(14) -0.0626(14) 0.2085(6) 0.036(9) Uiso 1 1 d . . . .  
O159 O 0.0696(15) -0.1382(16) 0.2484(7) 0.049(10) Uiso 1 1 d . . . .  
O160 O 0.1951(13) -0.1702(14) 0.2404(6) 0.033(8) Uiso 1 1 d . . . .  
O161 O 0.1191(14) -0.2558(14) 0.2578(6) 0.034(8) Uiso 1 1 d . . . .  
O162 O 0.2253(13) -0.3309(13) 0.2768(6) 0.024(7) Uiso 1 1 d . . . .  
O163 O 0.1295(14) -0.3391(15) 0.3219(7) 0.039(9) Uiso 1 1 d . . . .  
O164 O 0.2471(15) -0.4070(16) 0.3324(7) 0.047(10) Uiso 1 1 d . . . .  
O165 O 0.2037(16) -0.3041(16) 0.3580(7) 0.052(10) Uiso 1 1 d . . . .  
O166 O 0.0774(16) -0.2826(16) 0.3654(7) 0.055(10) Uiso 1 1 d . . . .  
O167 O 0.148(2) -0.314(2) 0.4179(10) 0.092(15) Uiso 1 1 d . . . .  
O168 O 0.0969(15) -0.2009(16) 0.4014(7) 0.049(10) Uiso 1 1 d . . . .  
O169 O -0.0376(15) -0.3140(15) 0.3700(7) 0.043(9) Uiso 1 1 d . . . .  
O170 O 0.0996(15) -0.0578(16) 0.3470(7) 0.046(9) Uiso 1 1 d . . . .  
O171 O 0.0084(16) -0.0625(17) 0.3140(7) 0.055(10) Uiso 1 1 d . . . .  
O172 O 0.053(2) 0.041(3) 0.3081(11) 0.122(18) Uiso 1 1 d . . . .  
O173 O 0.0883(14) -0.0344(15) 0.2631(7) 0.041(9) Uiso 1 1 d . . . .  
O174 O 0.1575(16) -0.1859(17) 0.3506(7) 0.055(10) Uiso 1 1 d . . . .  
O175 O 0.2014(16) -0.2368(16) 0.2988(7) 0.053(10) Uiso 1 1 d . . . .  
O176 O 0.1457(14) -0.1181(15) 0.2936(7) 0.038(9) Uiso 1 1 d . . . .  
O177 O 0.1693(15) -0.0136(15) 0.3016(7) 0.042(9) Uiso 1 1 d . . . .  
O178 O 0.2195(13) -0.0645(14) 0.2500(6) 0.031(8) Uiso 1 1 d . . . .  
O179 O 0.2936(15) -0.2439(16) 0.2568(7) 0.047(10) Uiso 1 1 d . . . .  
O180 O 0.2983(17) -0.3089(18) 0.3155(8) 0.066(12) Uiso 1 1 d . . . .  
O181 O 0.2225(17) -0.2285(17) 0.3908(8) 0.062(11) Uiso 1 1 d . . . .  
O182 O 0.1735(19) -0.118(2) 0.3861(9) 0.080(13) Uiso 1 1 d . . . .  
O183 O 0.293(2) -0.208(2) 0.3394(9) 0.090(14) Uiso 1 1 d . . . .  
O184 O 0.2936(13) -0.1449(14) 0.2833(6) 0.030(8) Uiso 1 1 d . . . .  
O185 O 0.2465(18) -0.0991(19) 0.3326(9) 0.075(13) Uiso 1 1 d . . . .  
O186 O 0.3136(19) -0.1493(19) 0.3825(9) 0.077(13) Uiso 1 1 d . . . .  
O187 O 0.3947(16) -0.2329(17) 0.2915(7) 0.056(10) Uiso 1 1 d . . . .  
O188 O 0.3047(17) -0.0317(18) 0.2848(8) 0.064(11) Uiso 1 1 d . . . .  
O189 O -0.0702(15) -0.1335(15) 0.2447(7) 0.046(9) Uiso 1 1 d . . . .  
O190 O 0.0136(16) -0.2817(17) 0.3117(8) 0.060(11) Uiso 1 1 d . . . .  
O191 O -0.1070(15) -0.2422(15) 0.2762(7) 0.043(9) Uiso 1 1 d . . . .  
O192 O -0.0007(12) -0.3140(13) 0.2495(6) 0.020(7) Uiso 1 1 d . . . .  
O193 O -0.0145(15) -0.1641(16) 0.3026(7) 0.050(10) Uiso 1 1 d . . . .  
O194 O 0.0111(13) -0.2251(13) 0.2135(6) 0.025(8) Uiso 1 1 d . . . .  
O195 O -0.0907(14) -0.1897(15) 0.3574(7) 0.041(9) Uiso 1 1 d . . . .  
O196 O 0.0263(17) -0.1472(17) 0.3586(8) 0.062(11) Uiso 1 1 d . . . .  
O197 O -0.1119(15) -0.0796(16) 0.3158(7) 0.050(10) Uiso 1 1 d . . . .  
O198 O -0.0749(17) -0.0801(18) 0.3694(8) 0.066(12) Uiso 1 1 d . . . .  
O199 O -0.081(2) 0.029(3) 0.3937(11) 0.125(19) Uiso 1 1 d . . . .  
O200 O -0.150(2) -0.069(2) 0.4215(10) 0.093(15) Uiso 1 1 d . . . .  
O201 O -0.1622(17) -0.1797(18) 0.4147(8) 0.066(11) Uiso 1 1 d . . . .  
O202 O -0.207(3) -0.147(3) 0.4670(13) 0.15(2) Uiso 1 1 d . . . .  
O204 O -0.2450(17) -0.2467(18) 0.3922(8) 0.064(11) Uiso 1 1 d . . . .  
O205 O -0.350(2) -0.262(2) 0.4307(11) 0.122(18) Uiso 1 1 d . . . .  
O206 O -0.356(2) -0.236(2) 0.3732(11) 0.106(16) Uiso 1 1 d . . . .  
O207 O -0.3908(16) -0.2245(17) 0.3112(8) 0.055(10) Uiso 1 1 d . . . .  
O208 O -0.2723(15) -0.2322(15) 0.3214(7) 0.045(9) Uiso 1 1 d . . . .  
O209 O -0.3232(18) -0.1266(18) 0.2951(8) 0.070(12) Uiso 1 1 d . . . .  
O210 O -0.2693(15) -0.0818(16) 0.2391(7) 0.047(10) Uiso 1 1 d . . . .  
O211 O -0.1973(15) -0.1490(16) 0.2813(7) 0.050(10) Uiso 1 1 d . . . .  
O212 O -0.1862(15) -0.0305(16) 0.2705(7) 0.049(10) Uiso 1 1 d . . . .  
O213 O -0.1021(18) 0.0366(19) 0.2861(8) 0.071(12) Uiso 1 1 d . . . .  
O214 O -0.2439(16) -0.0628(17) 0.3225(8) 0.060(11) Uiso 1 1 d . . . .

O215 O -0.2207(16) -0.0760(16) 0.3837(7) 0.055(10) Uiso 1 1 d . . .  
O216 O -0.305(2) -0.142(2) 0.3626(9) 0.087(14) Uiso 1 1 d . . .  
O217 O -0.4235(17) -0.1318(18) 0.3443(8) 0.068(12) Uiso 1 1 d . . .  
O218 O -0.3202(16) -0.0150(16) 0.2828(7) 0.055(10) Uiso 1 1 d . . .  
O219 O -0.2359(19) 0.048(2) 0.3044(9) 0.084(14) Uiso 1 1 d . . .  
O220 O -0.2002(19) 0.028(2) 0.3961(9) 0.080(13) Uiso 1 1 d . . .  
O221 O -0.279(2) -0.056(2) 0.4346(10) 0.105(16) Uiso 1 1 d . . .  
O222 O -0.4019(18) -0.1506(19) 0.4047(9) 0.077(13) Uiso 1 1 d . . .  
O224 O -0.3036(18) 0.0283(19) 0.3599(9) 0.078(13) Uiso 1 1 d . . .  
O225 O -0.3805(18) -0.0291(19) 0.3374(9) 0.074(12) Uiso 1 1 d . . .  
O226 O -0.374(2) 0.091(2) 0.3096(11) 0.111(17) Uiso 1 1 d . . .  
O227 O -0.340(2) 0.058(2) 0.4167(10) 0.094(15) Uiso 1 1 d . . .  
O228 O -0.487(2) -0.058(2) 0.3799(11) 0.112(17) Uiso 1 1 d . . .  
O229 O -0.1571(14) -0.2727(14) 0.3396(6) 0.037(9) Uiso 1 1 d . . .  
O230 O -0.1411(19) -0.3035(19) 0.4405(9) 0.079(13) Uiso 1 1 d . . .  
O231 O -0.1546(15) -0.3614(16) 0.3895(7) 0.049(10) Uiso 1 1 d . . .  
O232 O -0.0354(16) -0.2434(17) 0.4123(8) 0.057(11) Uiso 1 1 d . . .  
O233 O -0.0187(15) -0.5149(16) 0.3510(7) 0.048(10) Uiso 1 1 d . . .  
O234 O -0.0430(17) -0.4427(18) 0.3912(8) 0.064(11) Uiso 1 1 d . . .  
O235 O -0.1192(14) -0.4259(14) 0.4436(6) 0.033(8) Uiso 1 1 d . . .  
O236 O -0.0162(16) -0.5052(16) 0.4591(7) 0.051(10) Uiso 1 1 d . . .  
O237 O -0.1041(15) -0.4604(16) 0.5027(7) 0.051(10) Uiso 1 1 d . . .  
O238 O -0.0979(17) -0.5743(18) 0.4926(8) 0.067(12) Uiso 1 1 d . . .  
O239 O 0.0205(18) -0.6253(19) 0.4735(8) 0.071(12) Uiso 1 1 d . . .  
O240 O -0.0396(19) -0.674(2) 0.5269(9) 0.081(13) Uiso 1 1 d . . .  
O241 O -0.0255(18) -0.7326(19) 0.4758(8) 0.071(12) Uiso 1 1 d . . .  
O242 O 0.0391(15) -0.7267(16) 0.4204(7) 0.049(10) Uiso 1 1 d . . .  
O243 O -0.017(3) -0.826(3) 0.4412(12) 0.14(2) Uiso 1 1 d . . .  
O244 O -0.067(2) -0.730(2) 0.3979(9) 0.092(15) Uiso 1 1 d . . .  
O245 O 0.0183(17) -0.6598(18) 0.3736(8) 0.065(11) Uiso 1 1 d . . .  
O246 O -0.0396(18) -0.7281(19) 0.3374(9) 0.074(12) Uiso 1 1 d . . .  
O247 O -0.0658(16) -0.6058(17) 0.3312(7) 0.054(10) Uiso 1 1 d . . .  
O248 O -0.1155(17) -0.4942(18) 0.3087(8) 0.069(12) Uiso 1 1 d . . .  
O249 O -0.2230(18) -0.456(2) 0.4180(9) 0.079(13) Uiso 1 1 d . . .  
O250 O -0.1998(15) -0.5000(16) 0.4746(7) 0.050(10) Uiso 1 1 d . . .  
O251 O -0.1429(19) -0.6819(19) 0.4953(9) 0.080(13) Uiso 1 1 d . . .  
O252 O -0.127(2) -0.749(2) 0.4531(10) 0.097(15) Uiso 1 1 d . . .  
O253 O -0.153(2) -0.678(2) 0.3625(10) 0.096(15) Uiso 1 1 d . . .  
O254 O -0.1856(17) -0.5613(18) 0.3473(8) 0.063(11) Uiso 1 1 d . . .  
O255 O -0.2394(16) -0.5629(17) 0.4059(8) 0.059(11) Uiso 1 1 d . . .  
O256 O -0.2211(19) -0.604(2) 0.4603(9) 0.079(13) Uiso 1 1 d . . .  
O257 O -0.2051(17) -0.6726(18) 0.4179(8) 0.065(11) Uiso 1 1 d . . .  
O258 O -0.254(2) -0.717(2) 0.4773(11) 0.118(18) Uiso 1 1 d . . .  
O259 O -0.302(3) -0.513(2) 0.4498(11) 0.115(17) Uiso 1 1 d . . .  
O260 O -0.285(2) -0.636(2) 0.3733(10) 0.097(15) Uiso 1 1 d . . .  
O261 O 0.0925(16) -0.6289(16) 0.4164(7) 0.052(10) Uiso 1 1 d . . .  
O262 O 0.0665(15) -0.5172(16) 0.3970(7) 0.048(10) Uiso 1 1 d . . .  
O263 O 0.1116(15) -0.4563(16) 0.4406(7) 0.050(10) Uiso 1 1 d . . .  
O264 O 0.1600(18) -0.6410(19) 0.4673(8) 0.073(12) Uiso 1 1 d . . .  
O265 O 0.1975(17) -0.5438(17) 0.4242(8) 0.063(11) Uiso 1 1 d . . .  
O266 O 0.282(3) -0.481(3) 0.3871(14) 0.046(19) Uiso 0.50 1 d P . . .  
O267 O 0.324(4) -0.548(4) 0.4323(18) 0.09(3) Uiso 0.50 1 d P . . .  
O268 O 0.2772(16) -0.6457(17) 0.4154(8) 0.059(11) Uiso 1 1 d . . .  
O269 O 0.360(2) -0.682(2) 0.4600(10) 0.100(15) Uiso 1 1 d . . .  
O270 O 0.3992(15) -0.6856(16) 0.3977(7) 0.046(10) Uiso 1 1 d . . .  
O271 O 0.3452(16) -0.5809(17) 0.3678(7) 0.056(11) Uiso 1 1 d . . .  
O272 O 0.2276(16) -0.5551(17) 0.3590(7) 0.055(10) Uiso 1 1 d . . .  
O273 O 0.4807(19) -0.604(2) 0.3656(9) 0.083(13) Uiso 1 1 d . . .  
O274 O 0.4156(17) -0.6153(18) 0.3151(8) 0.065(11) Uiso 1 1 d . . .  
O275 O 0.2903(13) -0.6043(14) 0.3045(6) 0.029(8) Uiso 1 1 d . . .  
O276 O 0.3873(16) -0.6177(16) 0.2588(7) 0.053(10) Uiso 1 1 d . . .  
O277 O 0.3128(16) -0.7090(17) 0.2857(7) 0.055(10) Uiso 1 1 d . . .  
O278 O 0.1902(16) -0.6709(17) 0.3039(7) 0.056(10) Uiso 1 1 d . . .  
O279 O 0.2088(19) -0.7334(19) 0.2560(9) 0.080(13) Uiso 1 1 d . . .

O280 O 0.1569(18) -0.7812(19) 0.3117(8) 0.073(12) Uiso 1 1 d . . . .  
O281 O 0.1095(14) -0.7417(15) 0.3658(7) 0.038(9) Uiso 1 1 d . . . .  
O282 O 0.0983(19) -0.857(2) 0.3589(9) 0.079(13) Uiso 1 1 d . . . .  
O283 O 0.1923(17) -0.8250(17) 0.3952(8) 0.063(11) Uiso 1 1 d . . . .  
O284 O 0.1691(15) -0.7176(16) 0.4091(7) 0.047(10) Uiso 1 1 d . . . .  
O285 O 0.166(2) -0.817(2) 0.4565(11) 0.109(17) Uiso 1 1 d . . . .  
O286 O 0.259(2) -0.744(2) 0.4480(10) 0.100(16) Uiso 1 1 d . . . .  
O287 O 0.2966(16) -0.7554(17) 0.3949(8) 0.058(11) Uiso 1 1 d . . . .  
O288 O 0.3563(14) -0.6997(15) 0.3417(7) 0.037(9) Uiso 1 1 d . . . .  
O289 O 0.2547(14) -0.7651(15) 0.3416(7) 0.039(9) Uiso 1 1 d . . . .  
O290 O 0.2856(17) -0.8167(17) 0.2934(8) 0.062(11) Uiso 1 1 d . . . .  
O291 O 0.2240(16) -0.8716(17) 0.3454(8) 0.059(11) Uiso 1 1 d . . . .  
O292 O 0.2857(16) -0.8474(16) 0.4280(7) 0.053(10) Uiso 1 1 d . . . .  
O293 O 0.3849(17) -0.7877(18) 0.4299(8) 0.065(11) Uiso 1 1 d . . . .  
O294 O 0.4344(13) -0.7169(14) 0.2966(6) 0.028(8) Uiso 1 1 d . . . .  
O295 O 0.4766(15) -0.7075(15) 0.3496(7) 0.045(9) Uiso 1 1 d . . . .  
O296 O 0.3902(14) -0.8144(14) 0.3230(7) 0.038(9) Uiso 1 1 d . . . .  
O297 O 0.4275(16) -0.8027(17) 0.3740(8) 0.059(11) Uiso 1 1 d . . . .  
O298 O 0.3306(15) -0.8631(16) 0.3739(7) 0.049(10) Uiso 1 1 d . . . .  
O299 O 0.4170(19) -0.902(2) 0.4178(9) 0.085(14) Uiso 1 1 d . . . .  
O300 O 0.5207(14) -0.8072(15) 0.3226(7) 0.041(9) Uiso 1 1 d . . . .  
O301 O 0.3476(17) -0.9222(18) 0.3202(8) 0.069(12) Uiso 1 1 d . . . .  
O302 O 0.1407(14) -0.6369(15) 0.3599(7) 0.040(9) Uiso 1 1 d . . . .  
O303 O 0.0700(14) -0.5870(15) 0.3073(7) 0.041(9) Uiso 1 1 d . . . .  
O304 O 0.2301(16) -0.4881(17) 0.2977(7) 0.057(11) Uiso 1 1 d . . . .  
O305 O 0.1740(19) -0.552(2) 0.2653(9) 0.081(13) Uiso 1 1 d . . . .  
O306 O 0.1039(14) -0.4982(14) 0.3380(6) 0.035(8) Uiso 1 1 d . . . .  
O307 O 0.0084(13) -0.3974(13) 0.3326(6) 0.024(8) Uiso 1 1 d . . . .  
O308 O 0.0755(14) -0.4029(14) 0.3734(6) 0.034(8) Uiso 1 1 d . . . .  
O309 O -0.1434(16) -0.4774(17) 0.3679(8) 0.057(11) Uiso 1 1 d . . . .  
O313 O -0.226(3) 0.139(3) 0.3503(12) 0.14(2) Uiso 1 1 d . . . .  
O317 O -0.530(3) -0.169(3) 0.3393(12) 0.14(2) Uiso 1 1 d . . . .  
O319 O -0.347(3) -0.365(4) 0.2591(16) 0.07(2) Uiso 0.50 1 d P . . . .  
O320 O -0.1431(18) -0.0297(18) 0.0531(8) 0.071(12) Uiso 1 1 d . . . .  
O321 O -0.2898(19) -0.056(2) 0.0379(9) 0.080(13) Uiso 1 1 d . . . .  
O322 O -0.357(4) -0.204(4) 0.0457(17) 0.08(3) Uiso 0.50 1 d P . . . .  
O323 O -0.407(2) -0.081(2) 0.0079(10) 0.108(16) Uiso 1 1 d . . . .  
O324 O 0.0000 0.0000 0.0000 0.077(18) Uiso 1 2 d S . . . .  
O325 O -0.298(2) -0.299(2) -0.0186(11) 0.115(17) Uiso 1 1 d . . . .  
O326 O 0.113(3) -0.257(3) -0.0198(14) 0.17(3) Uiso 1 1 d . . . .  
O327 O -0.002(3) -0.421(3) -0.0034(14) 0.18(3) Uiso 1 1 d . . . .  
O328 O 0.0032(15) -0.3049(16) 0.0183(7) 0.049(10) Uiso 1 1 d . . . .  
O329 O 0.251(2) -0.418(2) -0.0465(11) 0.114(17) Uiso 1 1 d . . . .  
O330 O -0.025(3) -0.155(3) 0.4506(13) 0.16(2) Uiso 1 1 d . . . .  
O334 O 0.3776(16) -1.0409(17) 0.3451(8) 0.057(11) Uiso 1 1 d . . . .  
O335 O -0.040(3) -0.856(3) 0.3730(12) 0.14(2) Uiso 1 1 d . . . .  
O337 O 0.125(3) -0.736(3) 0.5101(13) 0.13(2) Uiso 1 1 d . . . .  
O340 O -0.228(3) 0.156(3) 0.0644(12) 0.14(2) Uiso 1 1 d . . . .  
O341 O 0.457(2) -0.980(2) 0.2967(9) 0.091(14) Uiso 1 1 d . . . .  
O343 O 0.613(2) -0.844(2) 0.3673(10) 0.098(15) Uiso 1 1 d . . . .  
O344 O 0.620(3) -0.702(3) 0.3548(15) 0.19(3) Uiso 1 1 d . . . .  
O345 O 0.670(2) -0.777(3) 0.2964(11) 0.126(19) Uiso 1 1 d . . . .  
O346 O -0.151(3) -0.062(3) 0.1348(12) 0.14(2) Uiso 1 1 d . . . .  
O347 O 0.548(2) -0.737(2) 0.2509(10) 0.106(16) Uiso 1 1 d . . . .  
O349 O 0.460(2) -0.731(2) 0.2109(10) 0.108(16) Uiso 1 1 d . . . .  
O350 O 0.504(3) -0.587(3) 0.2088(12) 0.14(2) Uiso 1 1 d . . . .  
O351 O 0.430(2) -0.644(3) 0.1500(11) 0.125(19) Uiso 1 1 d . . . .  
O354 O 0.119(2) 0.3871(19) 0.0557(9) 0.047(12) Uiso 1 1 d . . . .  
O355 O 0.368(2) -0.490(2) 0.2889(11) 0.123(18) Uiso 1 1 d . . . .  
O356 O 0.2921(17) -0.5161(18) 0.2377(8) 0.067(12) Uiso 1 1 d . . . .  
O357 O 0.677(3) -0.313(3) 0.0884(13) 0.16(2) Uiso 1 1 d . . . .  
O358 O 0.548(3) -0.049(3) 0.2761(13) 0.16(2) Uiso 1 1 d . . . .  
O359 O 0.435(3) -0.221(3) 0.2112(14) 0.17(3) Uiso 1 1 d . . . .  
O361 O -0.1227(14) -0.5285(15) 0.4301(7) 0.040(9) Uiso 1 1 d . . . .



O362 O -0.0839(17) -0.6522(17) 0.4446(8) 0.061(11) Uiso 1 1 d . . . .  
O363 O -0.1100(14) -0.6011(14) 0.3873(7) 0.038(9) Uiso 1 1 d . . . .  
O364 O -0.091(2) -0.613(2) 0.2718(9) 0.093(15) Uiso 1 1 d . . . .  
O365 O 0.1072(19) -0.202(2) 0.4653(9) 0.083(13) Uiso 1 1 d . . . .  
O366 O 0.492(2) -0.215(2) 0.1589(10) 0.099(15) Uiso 1 1 d . . . .  
O368 O -0.0853(16) -0.3768(16) 0.2942(7) 0.052(10) Uiso 1 1 d . . . .  
O371 O 0.785(3) 0.129(3) 0.1202(13) 0.16(2) Uiso 1 1 d . . . .  
O372 O 0.403(2) 0.200(2) 0.2521(11) 0.119(18) Uiso 1 1 d . . . .  
O373 O 0.0522(16) -0.0869(17) 0.4042(8) 0.058(11) Uiso 1 1 d . . . .  
O374 O 0.168(3) 0.109(3) 0.2800(13) 0.16(2) Uiso 1 1 d . . . .  
O375 O 0.495(2) -0.872(2) 0.2680(10) 0.102(16) Uiso 1 1 d . . . .  
O377 O -0.1278(15) -0.1652(16) 0.1905(7) 0.049(10) Uiso 1 1 d . . . .  
O378 O 0.3937(19) -0.1178(19) 0.2322(9) 0.079(13) Uiso 1 1 d . . . .  
O379 O 0.2953(12) -0.6681(13) 0.1412(6) 0.022(7) Uiso 1 1 d . . . .  
O380 O 0.375(3) -0.340(3) 0.2383(12) 0.13(2) Uiso 1 1 d . . . .  
O381 O 0.184(3) 0.320(3) 0.1643(12) 0.14(2) Uiso 1 1 d . . . .  
O382 O 0.082(2) -0.603(2) 0.2428(10) 0.107(16) Uiso 1 1 d . . . .  
O386 O -0.383(5) -0.351(5) 0.323(2) 0.14(4) Uiso 0.50 1 d P . . .  
O387 O -0.116(3) -0.588(3) 0.0515(15) 0.20(3) Uiso 1 1 d . . . .  
O389 O 0.328(3) -0.105(3) 0.0025(14) 0.17(3) Uiso 1 1 d . . . .  
O392 O -0.1711(18) -0.3076(19) -0.0118(9) 0.078(13) Uiso 1 1 d . . . .  
O393 O -0.0379(16) -0.0195(16) 0.2304(7) 0.052(10) Uiso 1 1 d . . . .  
O394 O 0.3036(13) 0.0984(14) 0.2530(6) 0.032(8) Uiso 1 1 d . . . .  
O395 O 0.2021(19) -0.986(2) 0.3644(9) 0.086(14) Uiso 1 1 d . . . .  
O396 O 0.1986(18) -0.5618(18) 0.1950(8) 0.070(12) Uiso 1 1 d . . . .  
O397 O -0.345(3) 0.142(3) 0.2385(13) 0.15(2) Uiso 1 1 d . . . .  
O398 O 0.0725(16) 0.3687(17) 0.1063(8) 0.060(11) Uiso 1 1 d . . . .  
O399 O -0.2228(16) -0.4666(17) 0.2676(8) 0.059(11) Uiso 1 1 d . . . .  
O400 O 0.0399(19) 0.044(2) 0.3792(9) 0.081(13) Uiso 1 1 d . . . .  
Na1 Na 0.0545(7) -0.1210(7) 0.1730(3) 0.019(4) Uiso 1 1 d . . . .  
Na2 Na 0.5423(12) -0.4751(12) 0.0111(5) 0.082(8) Uiso 1 1 d . . . .  
Na3 Na 0.7793(7) -0.1134(7) 0.0899(3) 0.016(4) Uiso 1 1 d . . . .  
Na4 Na -0.3763(12) -0.2374(13) 0.1368(6) 0.087(8) Uiso 1 1 d . . . .  
Na5 Na 0.5888(15) -0.8300(15) 0.2785(7) 0.120(11) Uiso 1 1 d . . . .  
Na6 Na 0.3772(10) -1.0076(10) 0.3812(5) 0.056(6) Uiso 1 1 d . . . .  
Na7 Na 0.4098(14) -0.6333(15) 0.2040(7) 0.113(10) Uiso 1 1 d . . . .  
Na8 Na 0.3047(16) -0.6654(16) 0.2078(7) 0.129(12) Uiso 1 1 d . . . .  
Na9 Na 0.2460(12) -0.0659(12) -0.0524(6) 0.085(8) Uiso 1 1 d . . . .  
Na10 Na 0.5144(15) -0.9245(16) 0.3655(7) 0.122(11) Uiso 1 1 d . . . .  
Na11 Na 0.1058(17) -0.7578(17) 0.5027(8) 0.111(12) Uiso 1 1 d . . . .  
Na12 Na -0.0691(10) -0.6363(10) 0.1215(5) 0.056(6) Uiso 1 1 d . . . .  
Na13 Na 0.1400(19) 0.4006(19) 0.0457(9) 0.123(15) Uiso 1 1 d . . . .  
Na15 Na -0.0429(15) 0.1219(16) 0.3347(7) 0.122(11) Uiso 1 1 d . . . .  
Na22 Na -0.2602(10) -0.1401(10) 0.1839(4) 0.055(6) Uiso 1 1 d . . . .  
Na16 Na -0.0075(8) -0.6302(8) 0.5715(3) 0.025(4) Uiso 1 1 d . . . .  
Cs6 Cs 0.4332(4) -0.2117(4) 0.00484(17) 0.074(3) Uani 0.50 1 d P . . .  
K3 K 0.6212(7) 0.0139(8) 0.2305(3) 0.094(6) Uani 1 1 d . . . .  
As1 As 0.4785(3) 0.0378(2) 0.12870(11) 0.0357(14) Uani 1 1 d . . . .  
As2 As 0.1242(2) 0.0859(2) 0.09607(10) 0.0273(13) Uani 1 1 d . . . .  
As3 As 0.2823(2) -0.3679(2) 0.10258(10) 0.0258(13) Uani 1 1 d . . . .  
As4 As -0.0751(2) -0.3890(2) 0.15165(10) 0.0308(13) Uani 1 1 d . . . .  
As5 As 0.1283(3) -0.1908(2) 0.31354(11) 0.0451(16) Uani 1 1 d . . . .  
As6 As -0.2274(4) -0.1206(3) 0.35364(12) 0.065(2) Uani 1 1 d . . . .  
As7 As -0.0625(3) -0.5872(3) 0.41654(12) 0.0525(17) Uani 1 1 d . . . .  
As8 As 0.2757(3) -0.7085(2) 0.35964(11) 0.0429(16) Uani 1 1 d . . . .  
Cs1 Cs 0.07944(18) -0.13214(16) 0.02015(8) 0.0518(10) Uani 1 1 d . . .  
. . . . .  
Cs2 Cs 0.29363(17) -0.18219(17) 0.17869(7) 0.0518(10) Uani 1 1 d . . .  
. . . . .  
Cs3 Cs 0.10702(18) -0.41214(16) 0.27171(7) 0.0500(10) Uani 1 1 d . . .  
. . . . .  
Cs4 Cs -0.2252(3) -0.3736(3) 0.31926(15) 0.106(2) Uani 0.80 1 d P . . .  
Cs5 Cs -0.3120(3) -0.2122(3) 0.23866(16) 0.116(2) Uani 0.80 1 d P . . .  
Dy1 Dy 0.39979(12) -0.06637(11) 0.08724(5) 0.0335(7) Uani 1 1 d . . . .

Dy2 Dy 0.16550(13) 0.02590(11) 0.17581(5) 0.0380(7) Uani 1 1 d . . .  
Dy3 Dy 0.20782(11) -0.35553(10) 0.18300(5) 0.0266(6) Uani 1 1 d . . .  
Dy4 Dy -0.01146(11) -0.24735(10) 0.11427(5) 0.0264(6) Uani 1 1 d . . .  
. . .  
Dy5 Dy 0.00439(13) -0.22142(11) 0.26458(5) 0.0354(7) Uani 1 1 d . . .  
Dy6 Dy -0.13116(16) -0.26197(13) 0.38866(5) 0.0587(9) Uani 1 1 d . . .  
. . .  
Dy7 Dy 0.08750(14) -0.55479(12) 0.44665(5) 0.0467(8) Uani 1 1 d . . .  
Dy8 Dy 0.17925(13) -0.57666(12) 0.31819(5) 0.0428(7) Uani 1 1 d . . .  
W1 W 0.59686(12) 0.14210(11) 0.08827(6) 0.0521(7) Uani 1 1 d . . .  
W2 W 0.65966(12) 0.01359(11) 0.14234(6) 0.0534(7) Uani 1 1 d . . .  
W3 W 0.55322(12) 0.13882(11) 0.17144(6) 0.0536(7) Uani 1 1 d . . .  
W4 W 0.44161(12) 0.04552(11) 0.20514(5) 0.0513(7) Uani 1 1 d . . .  
W5 W 0.55140(12) -0.07769(11) 0.18139(5) 0.0496(7) Uani 1 1 d . . .  
W6 W 0.58764(11) -0.07753(11) 0.10647(5) 0.0422(6) Uani 1 1 d . . .  
W7 W 0.52905(11) 0.04781(11) 0.05206(5) 0.0432(6) Uani 1 1 d . . .  
W8 W 0.43841(11) 0.16822(10) 0.07288(5) 0.0455(7) Uani 1 1 d . . .  
W9 W 0.39729(12) 0.16522(11) 0.15570(5) 0.0485(7) Uani 1 1 d . . .  
W10 W 0.30300(11) 0.08340(9) 0.11242(5) 0.0358(6) Uani 1 1 d . . .  
W11 W 0.19387(12) 0.22655(10) 0.09529(5) 0.0412(6) Uani 1 1 d . . .  
W12 W 0.23969(11) 0.12953(10) 0.03739(5) 0.0351(6) Uani 1 1 d . . .  
W13 W 0.16405(10) 0.00990(9) 0.03393(4) 0.0303(5) Uani 1 1 d . . .  
W14 W 0.02693(10) -0.02969(9) 0.08870(4) 0.0310(6) Uani 1 1 d . . .  
W15 W -0.01248(11) 0.05504(10) 0.14397(5) 0.0421(6) Uani 1 1 d . . .  
W16 W 0.07082(12) 0.18412(10) 0.14693(5) 0.0454(7) Uani 1 1 d . . .  
W17 W 0.03737(12) 0.24029(10) 0.07526(5) 0.0427(6) Uani 1 1 d . . .  
W18 W 0.08865(11) 0.14542(10) 0.01541(4) 0.0354(6) Uani 1 1 d . . .  
W19 W -0.04900(11) 0.10771(10) 0.07174(5) 0.0414(6) Uani 1 1 d . . .  
W20 W 0.20112(10) -0.07705(9) 0.10870(4) 0.0264(5) Uani 1 1 d . . .  
W21 W 0.17637(10) -0.21698(9) 0.11526(4) 0.0244(5) Uani 1 1 d . . .  
W22 W 0.25054(10) -0.26086(10) 0.04123(4) 0.0315(6) Uani 1 1 d . . .  
W23 W 0.36220(10) -0.23563(9) 0.09566(4) 0.0297(5) Uani 1 1 d . . .  
W24 W 0.39595(10) -0.34786(9) 0.15030(4) 0.0319(6) Uani 1 1 d . . .  
W25 W 0.33335(11) -0.48877(9) 0.15210(5) 0.0345(6) Uani 1 1 d . . .  
W26 W 0.23794(11) -0.51775(10) 0.09982(5) 0.0360(6) Uani 1 1 d . . .  
W27 W 0.19455(10) -0.39158(10) 0.04300(4) 0.0338(6) Uani 1 1 d . . .  
W28 W 0.35254(11) -0.37604(10) 0.02130(5) 0.0374(6) Uani 1 1 d . . .  
W29 W 0.46297(10) -0.35467(10) 0.07766(5) 0.0348(6) Uani 1 1 d . . .  
W30 W 0.39808(11) -0.50013(10) 0.07994(5) 0.0384(6) Uani 1 1 d . . .  
W31 W 0.10440(10) -0.39941(9) 0.11985(4) 0.0283(5) Uani 1 1 d . . .  
W32 W -0.02023(11) -0.47136(10) 0.08546(5) 0.0389(6) Uani 1 1 d . . .  
W33 W 0.02155(10) -0.52320(9) 0.16337(5) 0.0341(6) Uani 1 1 d . . .  
W34 W -0.03949(11) -0.45618(10) 0.22394(4) 0.0344(6) Uani 1 1 d . . .  
W35 W -0.16186(11) -0.32732(10) 0.21618(4) 0.0371(6) Uani 1 1 d . . .  
W36 W -0.19668(10) -0.27461(10) 0.14504(4) 0.0336(6) Uani 1 1 d . . .  
W37 W -0.12586(10) -0.34683(11) 0.08004(5) 0.0380(6) Uani 1 1 d . . .  
W38 W -0.17966(11) -0.47616(11) 0.11288(5) 0.0438(6) Uani 1 1 d . . .  
W39 W -0.25393(11) -0.40102(11) 0.17919(5) 0.0416(6) Uani 1 1 d . . .  
W40 W -0.13401(11) -0.53244(10) 0.19074(5) 0.0431(6) Uani 1 1 d . . .  
W41 W 0.01916(10) -0.30605(9) 0.20293(4) 0.0272(5) Uani 1 1 d . . .  
W42 W 0.13579(12) -0.10180(9) 0.24464(4) 0.0400(6) Uani 1 1 d . . .  
W43 W 0.20018(11) -0.25629(9) 0.25155(4) 0.0358(6) Uani 1 1 d . . .  
W44 W 0.21561(12) -0.33521(10) 0.32034(5) 0.0443(7) Uani 1 1 d . . .  
W45 W 0.14964(14) -0.26491(12) 0.38637(5) 0.0602(8) Uani 1 1 d . . .  
W46 W 0.09355(15) -0.12167(12) 0.37871(5) 0.0650(9) Uani 1 1 d . . .  
W47 W 0.08195(15) -0.02743(11) 0.30565(5) 0.0601(8) Uani 1 1 d . . .  
W48 W 0.24453(14) -0.06921(11) 0.29011(5) 0.0582(8) Uani 1 1 d . . .  
W49 W 0.31354(13) -0.22748(11) 0.29485(5) 0.0500(7) Uani 1 1 d . . .  
W50 W 0.25351(15) -0.16188(12) 0.36498(5) 0.0638(9) Uani 1 1 d . . .  
W51 W -0.04695(13) -0.13067(11) 0.33491(5) 0.0524(7) Uani 1 1 d . . .  
W52 W -0.13201(18) -0.02235(13) 0.38554(6) 0.0859(11) Uani 1 1 d . . .  
. . .  
W53 W -0.16051(14) -0.00454(11) 0.30431(5) 0.0607(8) Uani 1 1 d . . .  
W54 W -0.25573(12) -0.08792(12) 0.27635(5) 0.0550(7) Uani 1 1 d . . .

W55 W -0.34702(14) -0.19337(13) 0.32749(6) 0.0743(9) Uani 1 1 d . . .  
W56 W -0.32315(17) -0.21333(14) 0.40184(7) 0.0937(12) Uani 1 1 d . . .  
. .  
W57 W -0.2140(2) -0.12635(13) 0.43086(6) 0.1015(13) Uani 1 1 d . . .  
W58 W -0.2967(2) 0.00077(14) 0.40077(6) 0.1118(15) Uani 1 1 d . . .  
W59 W -0.32240(15) 0.02054(13) 0.31841(6) 0.0779(10) Uani 1 1 d . . .  
W60 W -0.41050(18) -0.08808(15) 0.37230(7) 0.1048(13) Uani 1 1 d . . .  
. .  
W61 W 0.03256(12) -0.33091(10) 0.34464(4) 0.0432(7) Uani 1 1 d . . .  
W62 W 0.04444(12) -0.47078(10) 0.36339(5) 0.0437(7) Uani 1 1 d . . .  
W63 W -0.10480(13) -0.53295(11) 0.34291(5) 0.0556(7) Uani 1 1 d . . .  
W64 W -0.12967(12) -0.43644(11) 0.40186(5) 0.0474(7) Uani 1 1 d . . .  
W65 W -0.09849(12) -0.49719(11) 0.47262(5) 0.0490(7) Uani 1 1 d . . .  
W66 W -0.05028(14) -0.65503(12) 0.48986(6) 0.0630(8) Uani 1 1 d . . .  
W67 W -0.03625(15) -0.75158(12) 0.43852(7) 0.0742(9) Uani 1 1 d . . .  
W68 W -0.06297(14) -0.67935(13) 0.36137(6) 0.0685(8) Uani 1 1 d . . .  
W69 W -0.21364(15) -0.61936(14) 0.38325(7) 0.0790(9) Uani 1 1 d . . .  
W70 W -0.18582(15) -0.68602(13) 0.46189(7) 0.0789(9) Uani 1 1 d . . .  
W71 W -0.23541(14) -0.52428(13) 0.44423(6) 0.0640(8) Uani 1 1 d . . .  
W72 W 0.09796(13) -0.67503(11) 0.39028(5) 0.0541(7) Uani 1 1 d . . .  
W73 W 0.15572(13) -0.81284(11) 0.35541(6) 0.0594(8) Uani 1 1 d . . .  
W74 W 0.22847(12) -0.73759(10) 0.29205(5) 0.0466(7) Uani 1 1 d . . .  
W75 W 0.36141(12) -0.64977(10) 0.29385(5) 0.0450(6) Uani 1 1 d . . .  
W76 W 0.41962(13) -0.63375(13) 0.35970(6) 0.0596(8) Uani 1 1 d . . .  
W77 W 0.33494(14) -0.70543(14) 0.42875(5) 0.0723(10) Uani 1 1 d . . .  
W78 W 0.21571(14) -0.79109(12) 0.42689(6) 0.0703(9) Uani 1 1 d . . .  
W79 W 0.36978(14) -0.83817(13) 0.40342(6) 0.0719(9) Uani 1 1 d . . .  
W80 W 0.31244(13) -0.85624(11) 0.33006(5) 0.0522(7) Uani 1 1 d . . .  
W81 W 0.44876(12) -0.76508(11) 0.33182(5) 0.0530(7) Uani 1 1 d . . .  
W82 W 0.2585(2) -0.5614(2) 0.39598(9) 0.0636(13) Uani 0.60 1 d P . . .  
O223 O -0.3827 -0.0437 0.3909 0.23(4) Uiso 1 1 d . . .  
O203 O -0.3015 -0.1662 0.4269 0.14(2) Uiso 1 1 d . . .

loop\_

\_atom\_site\_aniso\_label  
\_atom\_site\_aniso\_U\_11  
\_atom\_site\_aniso\_U\_22  
\_atom\_site\_aniso\_U\_33  
\_atom\_site\_aniso\_U\_23  
\_atom\_site\_aniso\_U\_13  
\_atom\_site\_aniso\_U\_12  
Cs6 0.115(7) 0.058(6) 0.049(5) 0.003(4) 0.011(5) -0.043(6)  
K3 0.100(12) 0.100(15) 0.086(11) -0.031(10) -0.050(10) 0.025(11)  
As1 0.053(4) 0.018(3) 0.038(3) 0.000(3) -0.012(3) -0.008(3)  
As2 0.048(3) 0.013(3) 0.021(3) -0.005(2) -0.012(2) 0.008(3)  
As3 0.040(3) 0.013(3) 0.023(3) -0.004(2) -0.003(2) 0.003(3)  
As4 0.044(3) 0.023(3) 0.025(3) -0.002(2) -0.008(2) 0.002(3)  
As5 0.091(5) 0.026(4) 0.017(3) 0.002(2) -0.011(3) -0.003(3)  
As6 0.119(6) 0.031(4) 0.029(3) 0.003(3) 0.020(3) 0.022(4)  
As7 0.080(5) 0.031(4) 0.040(4) 0.000(3) 0.005(3) 0.004(4)  
As8 0.067(4) 0.026(4) 0.034(3) 0.000(3) -0.010(3) 0.003(3)  
Cs1 0.064(3) 0.033(2) 0.061(2) -0.0079(19) -0.026(2) 0.001(2)  
Cs2 0.064(3) 0.050(3) 0.041(2) -0.0022(19) -0.0113(19) -0.003(2)  
Cs3 0.078(3) 0.034(2) 0.035(2) 0.0013(17) -0.0125(19) 0.002(2)  
Cs4 0.119(5) 0.084(5) 0.106(5) -0.012(4) -0.002(4) 0.017(4)  
Cs5 0.133(6) 0.084(6) 0.115(5) -0.004(4) 0.012(4) 0.016(5)  
Dy1 0.0426(16) 0.0206(16) 0.0367(15) 0.0025(12) -0.0092(12) -0.0030  
(13)  
Dy2 0.075(2) 0.0162(15) 0.0224(13) -0.0008(11) -0.0122(13) 0.0003(14)  
Dy3 0.0505(16) 0.0089(13) 0.0196(12) 0.0002(10) -0.0099(11) 0.0036  
(12)  
Dy4 0.0353(15) 0.0213(15) 0.0205(12) -0.0005(11) -0.0078(11) 0.0071  
(12)  
Dy5 0.0707(19) 0.0156(15) 0.0162(12) 0.0002(11) -0.0019(12) 0.0063

(14)  
Dy6 0.110(3) 0.0333(19) 0.0235(15) -0.0007(13) 0.0068(15) 0.0165(18)  
Dy7 0.078(2) 0.0285(17) 0.0234(14) 0.0111(12) 0.0039(14) 0.0091(16)  
Dy8 0.070(2) 0.0227(16) 0.0319(15) 0.0045(12) -0.0099(14) 0.0052(15)  
W1 0.0579(17) 0.0365(17) 0.0660(17) -0.0070(13) -0.0133(14) -0.0151  
(14)  
W2 0.0552(17) 0.0385(17) 0.0718(18) -0.0134(14) -0.0256(14) -0.0017  
(14)  
W3 0.0655(18) 0.0344(17) 0.0676(18) -0.0141(13) -0.0249(14) -0.0069  
(14)  
W4 0.0650(18) 0.0384(17) 0.0542(16) -0.0112(13) -0.0212(13) -0.0005  
(14)  
W5 0.0634(17) 0.0369(17) 0.0515(15) -0.0062(12) -0.0287(13) 0.0029  
(14)  
W6 0.0452(15) 0.0341(16) 0.0491(15) -0.0093(12) -0.0112(12) -0.0012  
(12)  
W7 0.0521(16) 0.0344(16) 0.0451(14) 0.0010(12) -0.0109(12) -0.0148  
(13)  
W8 0.0539(16) 0.0229(15) 0.0609(16) 0.0053(12) -0.0167(13) -0.0131  
(13)  
W9 0.0577(17) 0.0281(15) 0.0645(17) -0.0134(13) -0.0185(13) -0.0044  
(13)  
W10 0.0500(15) 0.0171(13) 0.0416(13) 0.0009(10) -0.0156(11) -0.0050  
(12)  
W11 0.0726(17) 0.0144(13) 0.0385(13) -0.0034(10) -0.0176(12) -0.0008  
(13)  
W12 0.0502(15) 0.0194(13) 0.0345(13) 0.0004(10) -0.0011(11) -0.0062  
(12)  
W13 0.0514(15) 0.0175(13) 0.0215(11) -0.0020(9) -0.0071(10) 0.0005  
(11)  
W14 0.0466(14) 0.0188(13) 0.0277(12) 0.0015(10) -0.0104(10) -0.0032  
(11)  
W15 0.0580(16) 0.0332(16) 0.0304(13) -0.0006(11) -0.0008(11) 0.0071  
(13)  
W16 0.0864(19) 0.0197(14) 0.0271(12) -0.0060(10) -0.0082(12) 0.0129  
(13)  
W17 0.0731(18) 0.0207(14) 0.0306(13) -0.0023(10) -0.0110(12) 0.0137  
(13)  
W18 0.0612(16) 0.0214(14) 0.0234(12) -0.0002(10) -0.0142(11) 0.0023  
(12)  
W19 0.0528(15) 0.0305(15) 0.0387(13) 0.0011(11) -0.0159(12) 0.0077  
(12)  
W20 0.0447(14) 0.0114(12) 0.0219(11) 0.0015(9) -0.0093(10) 0.0026(10)  
W21 0.0402(13) 0.0109(12) 0.0206(11) 0.0006(9) -0.0050(10) 0.0022(10)  
W22 0.0448(14) 0.0249(14) 0.0221(11) 0.0007(10) -0.0039(10) 0.0034  
(11)  
W23 0.0364(13) 0.0180(13) 0.0340(12) -0.0028(10) -0.0051(10) 0.0006  
(11)  
W24 0.0444(14) 0.0199(13) 0.0316(12) -0.0023(10) -0.0123(11) 0.0023  
(11)  
W25 0.0520(15) 0.0148(13) 0.0337(12) -0.0014(10) -0.0054(11) 0.0074  
(11)  
W26 0.0487(15) 0.0160(13) 0.0432(14) -0.0112(11) -0.0007(11) 0.0035  
(12)  
W27 0.0459(14) 0.0316(15) 0.0251(12) -0.0135(10) -0.0051(10) 0.0042  
(12)  
W28 0.0482(15) 0.0327(15) 0.0295(12) -0.0090(11) 0.0022(11) 0.0038  
(12)  
W29 0.0346(14) 0.0253(14) 0.0431(13) -0.0046(11) -0.0032(11) 0.0017  
(11)  
W30 0.0501(15) 0.0221(14) 0.0416(14) -0.0111(11) -0.0016(11) 0.0084  
(12)  
W31 0.0434(14) 0.0157(13) 0.0258(11) -0.0081(9) -0.0052(10) 0.0049  
(11)

W32 0.0485 (15) 0.0360 (16) 0.0363 (13) -0.0182 (11) -0.0038 (11) -0.0048 (13)  
W33 0.0447 (14) 0.0170 (13) 0.0407 (13) -0.0081 (10) -0.0026 (11) 0.0013 (11)  
W34 0.0517 (15) 0.0207 (14) 0.0281 (12) 0.0000 (10) -0.0017 (11) 0.0013 (12)  
W35 0.0497 (15) 0.0294 (15) 0.0277 (12) -0.0037 (10) 0.0026 (11) 0.0077 (12)  
W36 0.0369 (14) 0.0304 (15) 0.0303 (12) -0.0003 (10) -0.0028 (10) 0.0052 (11)  
W37 0.0430 (14) 0.0414 (16) 0.0297 (12) -0.0087 (11) -0.0095 (11) 0.0050 (12)  
W38 0.0486 (15) 0.0403 (17) 0.0474 (15) -0.0157 (12) -0.0075 (12) -0.0095 (13)  
W39 0.0399 (15) 0.0374 (16) 0.0452 (14) -0.0041 (12) -0.0016 (11) 0.0008 (12)  
W40 0.0534 (16) 0.0272 (15) 0.0478 (15) -0.0036 (12) -0.0014 (12) -0.0048 (13)  
W41 0.0443 (14) 0.0190 (13) 0.0160 (10) -0.0012 (9) -0.0030 (10) 0.0051 (11)  
W42 0.0857 (18) 0.0150 (13) 0.0180 (11) 0.0006 (10) -0.0083 (11) -0.0004 (13)  
W43 0.0693 (17) 0.0155 (13) 0.0216 (11) 0.0002 (9) -0.0110 (11) 0.0020 (12)  
W44 0.0741 (18) 0.0268 (15) 0.0307 (13) 0.0076 (11) -0.0162 (12) -0.0044 (13)  
W45 0.114 (2) 0.0453 (18) 0.0216 (13) 0.0063 (12) -0.0145 (14) -0.0140 (17)  
W46 0.134 (3) 0.0442 (18) 0.0192 (13) -0.0070 (12) -0.0076 (14) -0.0139 (18)  
W47 0.131 (3) 0.0270 (16) 0.0207 (13) -0.0072 (11) -0.0009 (14) -0.0031 (17)  
W48 0.120 (2) 0.0361 (17) 0.0246 (13) -0.0025 (11) -0.0164 (14) -0.0262 (17)  
W49 0.088 (2) 0.0355 (16) 0.0315 (13) 0.0016 (11) -0.0223 (13) -0.0194 (15)  
W50 0.126 (2) 0.0461 (19) 0.0251 (13) 0.0028 (12) -0.0215 (15) -0.0273 (18)  
W51 0.105 (2) 0.0279 (15) 0.0201 (12) -0.0056 (11) -0.0021 (13) 0.0087 (15)  
W52 0.180 (3) 0.0377 (19) 0.0318 (15) -0.0098 (13) 0.0033 (17) 0.018 (2)  
W53 0.110 (2) 0.0324 (16) 0.0303 (14) 0.0022 (12) 0.0000 (14) 0.0165 (16)  
W54 0.0706 (18) 0.0429 (18) 0.0408 (15) 0.0016 (12) 0.0055 (13) 0.0196 (15)  
W55 0.080 (2) 0.053 (2) 0.074 (2) 0.0091 (16) 0.0179 (16) 0.0192 (17)  
W56 0.135 (3) 0.057 (2) 0.0611 (19) 0.0156 (16) 0.0402 (19) 0.033 (2)  
W57 0.208 (4) 0.048 (2) 0.0266 (15) -0.0008 (14) 0.0275 (19) 0.035 (2)  
W58 0.209 (4) 0.050 (2) 0.0476 (18) -0.0034 (15) 0.044 (2) 0.050 (2)  
W59 0.113 (2) 0.0419 (19) 0.0574 (18) 0.0083 (14) 0.0234 (17) 0.0348 (18)  
W60 0.136 (3) 0.058 (2) 0.085 (2) 0.0212 (19) 0.054 (2) 0.044 (2)  
W61 0.0828 (18) 0.0231 (14) 0.0195 (12) 0.0031 (10) -0.0068 (12) 0.0061 (13)  
W62 0.0669 (17) 0.0282 (15) 0.0277 (12) 0.0106 (11) -0.0013 (12) 0.0086 (13)  
W63 0.081 (2) 0.0384 (17) 0.0442 (15) -0.0041 (13) -0.0074 (14) 0.0074 (15)  
W64 0.0695 (18) 0.0336 (16) 0.0325 (13) 0.0023 (11) -0.0032 (12) 0.0112 (14)  
W65 0.0738 (18) 0.0368 (16) 0.0279 (13) 0.0063 (11) 0.0033 (12) 0.0084 (14)  
W66 0.089 (2) 0.0362 (17) 0.0501 (16) 0.0167 (13) 0.0156 (14) 0.0005 (16)  
W67 0.102 (2) 0.0296 (18) 0.081 (2) 0.0039 (15) 0.0107 (18) 0.0000 (17)  
W68 0.092 (2) 0.0403 (19) 0.074 (2) -0.0147 (15) -0.0093 (17) -0.0005 (17)  
W69 0.083 (2) 0.063 (2) 0.094 (2) -0.0165 (18) -0.0121 (18) -0.0108 (19)  
W70 0.095 (2) 0.044 (2) 0.089 (2) 0.0035 (17) 0.0212 (18) -0.0126 (18)  
W71 0.0638 (19) 0.053 (2) 0.0693 (19) -0.0003 (15) 0.0044 (15) -0.0010 (16)  
W72 0.087 (2) 0.0311 (16) 0.0368 (14) 0.0038 (12) 0.0005 (13) 0.0089 (15)  
W73 0.081 (2) 0.0226 (15) 0.0680 (18) 0.0028 (13) 0.0032 (15) 0.0032 (15)  
W74 0.0721 (18) 0.0247 (15) 0.0428 (14) -0.0043 (11) -0.0140 (13) 0.0030 (13)  
W75 0.0703 (18) 0.0254 (15) 0.0374 (14) -0.0035 (11) -0.0036 (12) 0.0001 (13)

W76 0.0665(19) 0.058(2) 0.0597(17) -0.0264(15) -0.0165(14) 0.0039(16)  
W77 0.093(2) 0.079(2) 0.0390(15) -0.0150(15) -0.0186(15) 0.0340(19)  
W78 0.100(2) 0.0488(19) 0.0433(16) 0.0199(14) 0.0066(15) 0.0256(17)  
W79 0.099(2) 0.057(2) 0.0450(16) 0.0091(14) -0.0090(15) 0.0326(18)  
W80 0.0758(19) 0.0226(15) 0.0520(16) 0.0012(12) -0.0037(14) 0.0097  
(14)  
W81 0.0679(18) 0.0417(17) 0.0481(15) -0.0090(13) -0.0163(13) 0.0126  
(14)  
W82 0.089(4) 0.054(3) 0.043(3) -0.004(2) -0.003(2) 0.005(3)

\_geom\_special\_details

;  
All esds (except the esd in the dihedral angle between two l.s.  
planes)  
are estimated using the full covariance matrix. The cell esds are  
taken  
into account individually in the estimation of esds in distances,  
angles  
and torsion angles; correlations between esds in cell parameters are  
only  
used when they are defined by crystal symmetry. An approximate  
(isotropic)  
treatment of cell esds is used for estimating esds involving l.s.  
planes.  
;

loop\_

\_geom\_bond\_atom\_site\_label\_1  
\_geom\_bond\_atom\_site\_label\_2  
\_geom\_bond\_distance  
\_geom\_bond\_site\_symmetry\_2  
\_geom\_bond\_publ\_flag  
O1 W1 1.55(4) . ?  
O2 W2 1.69(4) . ?  
O3 W3 1.56(3) . ?  
O4 W4 1.72(3) . ?  
O5 W5 1.74(4) . ?  
O5 Cs5 3.09(4) 1\_655 ?  
O6 W6 1.70(4) . ?  
O7 W7 1.72(3) . ?  
O8 W8 1.68(4) . ?  
O9 W9 1.75(4) . ?  
O10 W2 1.89(3) . ?  
O10 W1 1.96(3) . ?  
O11 W3 1.83(3) . ?  
O11 W2 2.05(3) . ?  
O11 K3 2.93(3) . ?  
O12 W1 1.93(3) . ?  
O12 W3 1.96(3) . ?  
O13 W1 1.90(3) . ?  
O13 W7 2.04(4) . ?  
O13 Cs6 3.45(4) 2\_655 ?  
O14 W2 1.84(4) . ?  
O14 W6 2.08(3) . ?  
O14 Na3 2.91(4) . ?  
O15 W2 1.90(3) . ?  
O15 W5 2.02(3) . ?  
O15 K3 2.79(4) . ?  
O15 Na22 3.02(4) 1\_655 ?  
O16 W3 1.89(4) . ?  
O16 W4 2.06(4) . ?  
O16 K3 2.98(4) . ?  
O17 W9 1.82(3) . ?  
O17 W3 2.01(3) . ?

O18 W8 1.83(3) . ?  
O18 W1 1.99(3) . ?  
O18 Cs6 3.46(4) 2\_655 ?  
O19 W7 1.94(4) . ?  
O19 W8 1.98(4) . ?  
O19 Cs6 3.25(4) 2\_655 ?  
O20 W7 1.82(3) . ?  
O20 W6 2.01(3) . ?  
O21 W6 1.91(3) . ?  
O21 W5 1.94(3) . ?  
O21 Na4 2.90(4) 1\_655 ?  
O22 W4 1.90(3) . ?  
O22 W5 1.93(3) . ?  
O22 K3 2.82(3) . ?  
O23 W4 1.90(4) . ?  
O23 W9 1.96(3) . ?  
O24 W9 1.91(3) . ?  
O24 W8 1.92(3) . ?  
O25 As1 1.81(3) . ?  
O25 W9 2.29(3) . ?  
O25 W4 2.30(3) . ?  
O25 W3 2.31(3) . ?  
O26 As1 1.78(3) . ?  
O26 W6 2.24(3) . ?  
O26 W2 2.38(3) . ?  
O26 W5 2.42(3) . ?  
O27 As1 1.79(4) . ?  
O27 W7 2.29(3) . ?  
O27 W8 2.34(3) . ?  
O27 W1 2.38(3) . ?  
O28 W7 1.79(3) . ?  
O28 Dy1 2.31(4) . ?  
O29 W6 1.74(3) . ?  
O29 Dy1 2.43(3) . ?  
O30 W5 1.76(3) . ?  
O31 W4 1.74(3) . ?  
O32 W10 1.87(3) . ?  
O32 W9 1.97(3) . ?  
O33 W8 1.81(3) . ?  
O33 W10 2.03(3) . ?  
O34 W10 1.82(3) . ?  
O34 Dy1 2.26(3) . ?  
O35 W10 1.77(3) . ?  
O35 Dy2 2.24(3) . ?  
O36 Dy1 2.36(3) . ?  
O37 Dy1 2.43(3) . ?  
O37 Cs2 3.13(4) . ?  
O38 Dy1 2.39(4) . ?  
O38 Cs6 3.39(4) . ?  
O39 W11 1.76(3) . ?  
O39 W10 2.14(3) . ?  
O40 W12 1.85(3) . ?  
O40 W10 1.94(3) . ?  
O41 W12 1.89(3) . ?  
O41 W11 1.92(3) . ?  
O42 W11 1.90(3) . ?  
O42 W16 2.04(3) . ?  
O43 W16 1.88(3) . ?  
O43 W15 1.92(3) . ?  
O44 W14 1.87(3) . ?  
O44 W15 1.93(3) . ?  
O45 W13 1.87(3) . ?  
O45 W14 1.98(3) . ?  
O45 Cs1 3.29(3) . ?

O46 W13 1.91 (3) . ?  
O46 W12 1.95 (3) . ?  
O47 As2 1.82 (3) . ?  
O47 W12 2.20 (3) . ?  
O47 W18 2.28 (3) . ?  
O47 W13 2.36 (3) . ?  
O48 As2 1.81 (3) . ?  
O48 W16 2.25 (3) . ?  
O48 W17 2.35 (3) . ?  
O48 W11 2.45 (3) . ?  
O49 As2 1.81 (3) . ?  
O49 W15 2.28 (3) . ?  
O49 W14 2.33 (3) . ?  
O49 W19 2.35 (2) . ?  
O50 W11 1.64 (4) . ?  
O51 W16 1.67 (4) . ?  
O52 W16 1.82 (4) . ?  
O52 Dy2 2.29 (4) . ?  
O53 W15 1.81 (3) . ?  
O53 Dy2 2.31 (3) . ?  
O54 W15 1.69 (4) . ?  
O55 W14 1.74 (3) . ?  
O55 W20 2.20 (3) . ?  
O56 W14 1.72 (4) . ?  
O56 Cs1 3.25 (4) . ?  
O57 W13 1.88 (3) . ?  
O57 W20 1.97 (3) . ?  
O58 W13 1.74 (3) . ?  
O58 Cs1 3.18 (3) . ?  
O59 W12 1.66 (3) . ?  
O60 W18 1.89 (3) . ?  
O60 W12 1.94 (3) . ?  
O61 W17 1.91 (3) . ?  
O61 W11 1.98 (3) . ?  
O62 W17 1.85 (3) . ?  
O62 W16 2.06 (3) . ?  
O63 W19 1.86 (3) . ?  
O63 W15 2.06 (3) . ?  
O64 W19 1.96 (3) . ?  
O64 W14 2.03 (3) . ?  
O65 W13 1.89 (2) . ?  
O65 W18 2.00 (3) . ?  
O66 W18 1.78 (3) . ?  
O66 W19 2.09 (3) . ?  
O66 Cs1 3.17 (3) 2 ?  
O67 W17 1.87 (3) . ?  
O67 W19 1.97 (3) . ?  
O68 W18 1.84 (3) . ?  
O68 W17 2.01 (3) . ?  
O69 W19 1.69 (3) . ?  
O69 Cs1 3.30 (3) 2 ?  
O70 W18 1.72 (3) . ?  
O70 Cs1 3.32 (3) 2 ?  
O71 W17 1.74 (3) . ?  
O72 W20 1.77 (3) . ?  
O72 Dy1 2.45 (3) . ?  
O72 Cs2 3.76 (3) . ?  
O73 W20 1.80 (3) . ?  
O73 Dy2 2.26 (3) . ?  
O74 Dy2 2.30 (4) . ?  
O75 Dy2 2.45 (4) . ?  
O76 Dy2 2.54 (3) . ?  
O76 Cs2 3.51 (3) . ?  
O77 W23 1.68 (3) . ?



O77 Dy1 2.40 (3) . ?  
O78 W22 1.89 (3) . ?  
O78 W23 1.93 (2) . ?  
O78 Cs6 3.24 (3) . ?  
O79 W22 1.74 (3) . ?  
O79 Cs1 3.18 (3) . ?  
O80 W22 1.90 (3) . ?  
O80 W21 1.92 (3) . ?  
O81 W22 1.91 (3) . ?  
O81 W27 2.00 (3) . ?  
O82 W27 1.87 (3) . ?  
O82 W31 1.95 (3) . ?  
O83 W27 1.66 (3) . ?  
O84 W27 1.88 (3) . ?  
O84 W26 1.94 (3) . ?  
O85 W26 1.77 (3) . ?  
O85 W31 2.12 (3) . ?  
O86 W26 1.69 (4) . ?  
O86 Na13 2.81 (5) 1\_545 ?  
O87 W25 1.94 (3) . ?  
O87 W26 1.95 (3) . ?  
O88 W25 1.80 (3) . ?  
O88 Dy3 2.36 (3) . ?  
O89 W25 1.75 (3) . ?  
O89 Na7 2.42 (4) . ?  
O90 W24 1.90 (3) . ?  
O90 W25 1.92 (3) . ?  
O91 W24 1.83 (3) . ?  
O91 Dy3 2.30 (3) . ?  
O91 Cs2 3.59 (3) . ?  
O92 W24 1.68 (3) . ?  
O93 W23 1.98 (3) . ?  
O93 W24 1.98 (3) . ?  
O93 Cs2 3.45 (3) . ?  
O94 W29 1.86 (3) . ?  
O94 W23 2.05 (3) . ?  
O94 Cs6 3.24 (3) . ?  
O95 W22 1.88 (3) . ?  
O95 W28 2.01 (3) . ?  
O95 Cs6 3.35 (3) . ?  
O96 W27 1.91 (3) . ?  
O96 W28 1.98 (3) . ?  
O97 W30 1.94 (3) . ?  
O97 W26 1.96 (3) . ?  
O98 W30 1.86 (3) . ?  
O98 W25 2.04 (3) . ?  
O99 W29 1.85 (3) . ?  
O99 W24 2.04 (3) . ?  
O100 As3 1.81 (3) . ?  
O100 W25 2.25 (3) . ?  
O100 W30 2.36 (3) . ?  
O100 W26 2.45 (3) . ?  
O101 As3 1.80 (3) . ?  
O101 W28 2.25 (3) . ?  
O101 W22 2.32 (3) . ?  
O101 W27 2.35 (3) . ?  
O102 As3 1.86 (3) . ?  
O102 W24 2.28 (2) . ?  
O102 W23 2.30 (3) . ?  
O102 W29 2.32 (3) . ?  
O103 W28 1.81 (3) . ?  
O103 W30 1.98 (2) . ?  
O104 W28 1.82 (3) . ?  
O104 W29 2.04 (3) . ?

O104 Cs6 3.33 (3) . ?  
O105 W30 1.91 (3) . ?  
O105 W29 1.92 (3) . ?  
O106 W30 1.71 (3) . ?  
O107 W28 1.68 (4) . ?  
O108 W29 1.68 (3) . ?  
O109 W21 1.89 (3) . ?  
O109 W20 1.97 (3) . ?  
O109 Cs2 3.16 (2) . ?  
O110 W20 2.12 (3) . ?  
O110 W21 2.18 (3) . ?  
O110 Cs1 3.74 (3) . ?  
O111 W21 1.72 (3) . ?  
O111 Dy3 2.40 (3) . ?  
O111 Cs2 3.71 (3) . ?  
O112 Dy3 2.35 (3) . ?  
O112 Cs3 3.53 (3) . ?  
O113 W43 1.73 (3) . ?  
O113 Dy3 2.47 (3) . ?  
O113 Cs2 3.12 (3) . ?  
O114 W31 1.77 (3) . ?  
O114 Dy3 2.26 (3) . ?  
O115 W41 1.76 (3) . ?  
O115 Dy3 2.33 (3) . ?  
O115 Cs3 3.41 (3) . ?  
O116 Dy4 2.40 (3) . ?  
O116 Na1 2.83 (3) . ?  
O117 W31 1.75 (3) . ?  
O117 Dy4 2.26 (3) . ?  
O118 W41 1.73 (3) . ?  
O118 Dy4 2.35 (3) . ?  
O119 W33 1.88 (3) . ?  
O119 W32 1.95 (3) . ?  
O120 W21 1.74 (2) . ?  
O120 Dy4 2.40 (3) . ?  
O121 Dy4 2.47 (3) . ?  
O121 Cs1 3.19 (3) . ?  
O122 Dy4 2.42 (3) . ?  
O123 W36 1.78 (3) . ?  
O123 Dy4 2.32 (3) . ?  
O124 W37 1.80 (3) . ?  
O124 Dy4 2.33 (3) . ?  
O125 W32 1.81 (3) . ?  
O125 W31 2.08 (3) . ?  
O126 W33 1.86 (3) . ?  
O126 W31 1.95 (3) . ?  
O127 W34 1.87 (3) . ?  
O127 W41 1.97 (3) . ?  
O127 Cs3 3.78 (2) . ?  
O128 W35 1.83 (3) . ?  
O128 W41 2.12 (3) . ?  
O129 W35 1.72 (3) . ?  
O129 Cs5 3.18 (3) . ?  
O129 Cs4 3.32 (3) . ?  
O130 W34 1.87 (3) . ?  
O130 W35 1.94 (3) . ?  
O131 W34 1.65 (3) . ?  
O131 Cs3 3.08 (3) . ?  
O132 W34 1.85 (3) . ?  
O132 W33 2.05 (3) . ?  
O133 W33 1.62 (3) . ?  
O134 W52 1.89 (4) . ?  
O134 W53 1.94 (4) . ?  
O135 W32 1.67 (3) . ?

O136 W32 1.84 (3) . ?  
O136 W37 2.01 (3) . ?  
O137 W37 1.74 (3) . ?  
O138 W37 1.87 (3) . ?  
O138 W36 1.97 (3) . ?  
O139 W36 1.71 (3) . ?  
O139 Na3 2.80 (4) 1\_455 ?  
O139 Na4 2.84 (4) . ?  
O139 Na22 3.01 (4) . ?  
O140 W35 1.91 (3) . ?  
O140 W36 1.96 (3) . ?  
O140 Na22 3.02 (4) . ?  
O140 Cs5 3.26 (3) . ?  
O141 As4 1.85 (3) . ?  
O141 W36 2.24 (3) . ?  
O141 W39 2.32 (3) . ?  
O141 W35 2.34 (3) . ?  
O142 As4 1.82 (3) . ?  
O142 W33 2.28 (3) . ?  
O142 W34 2.29 (2) . ?  
O142 W40 2.30 (3) . ?  
O143 As4 1.81 (3) . ?  
O143 W37 2.27 (3) . ?  
O143 W38 2.35 (3) . ?  
O143 W32 2.45 (3) . ?  
O144 W38 1.92 (4) . ?  
O144 W32 1.92 (4) . ?  
O145 W38 1.88 (3) . ?  
O145 W37 1.98 (3) . ?  
O146 W36 1.87 (4) . ?  
O146 W39 1.88 (4) . ?  
O147 W35 1.91 (3) . ?  
O147 W39 1.93 (3) . ?  
O148 W34 1.83 (3) . ?  
O148 W40 2.00 (3) . ?  
O149 W33 1.82 (3) . ?  
O149 W40 2.05 (3) . ?  
O150 W40 1.91 (3) . ?  
O150 W38 1.97 (3) . ?  
O151 W39 1.87 (3) . ?  
O151 W38 1.93 (3) . ?  
O152 W40 1.91 (3) . ?  
O152 W39 1.93 (3) . ?  
O153 W40 1.61 (3) . ?  
O154 W39 1.57 (4) . ?  
O155 W38 1.56 (4) . ?  
O156 Dy3 2.47 (3) . ?  
O156 Cs3 3.18 (3) . ?  
O157 W23 1.68 (3) . ?  
O157 W21 2.28 (3) . ?  
O157 Cs2 3.26 (3) . ?  
O158 W42 1.73 (3) . ?  
O158 Dy2 2.43 (3) . ?  
O158 Na1 2.99 (3) . ?  
O159 W42 1.68 (3) . ?  
O159 Dy5 2.46 (4) . ?  
O160 W42 1.90 (3) . ?  
O160 W43 1.97 (3) . ?  
O160 Cs2 3.28 (3) . ?  
O161 W43 1.68 (3) . ?  
O161 Dy5 2.42 (3) . ?  
O161 Cs3 3.61 (3) . ?  
O162 W44 1.92 (3) . ?  
O162 W43 1.96 (3) . ?

O162 Cs3 3.31(3) . ?  
O163 W44 1.80(3) . ?  
O163 W61 2.16(3) . ?  
O163 Cs3 3.10(3) . ?  
O164 W44 1.74(3) . ?  
O165 W45 1.86(3) . ?  
O165 W44 1.90(3) . ?  
O166 W61 1.92(3) . ?  
O166 W45 1.96(3) . ?  
O167 W45 1.66(4) . ?  
O168 W45 1.89(4) . ?  
O168 W46 1.95(4) . ?  
O169 W61 1.79(3) . ?  
O169 Dy6 2.31(3) . ?  
O169 Na16 2.92(3) 2\_546 ?  
O170 W46 1.89(3) . ?  
O170 W47 1.93(3) . ?  
O171 W47 1.79(3) . ?  
O171 W51 2.11(4) . ?  
O172 W47 1.65(6) . ?  
O172 Na15 2.84(6) . ?  
O173 W47 1.92(3) . ?  
O173 W42 1.98(3) . ?  
O174 As5 1.84(3) . ?  
O174 W45 2.25(4) . ?  
O174 W46 2.29(4) . ?  
O174 W50 2.31(3) . ?  
O175 As5 1.87(3) . ?  
O175 W43 2.22(3) . ?  
O175 W44 2.33(4) . ?  
O175 W49 2.35(3) . ?  
O176 As5 1.84(3) . ?  
O176 W42 2.18(3) . ?  
O176 W47 2.44(3) . ?  
O176 W48 2.44(3) . ?  
O177 W47 1.87(3) . ?  
O177 W48 1.98(3) . ?  
O178 W48 1.90(3) . ?  
O178 W42 2.08(3) . ?  
O179 W49 1.89(3) . ?  
O179 W43 2.04(3) . ?  
O179 Cs2 3.56(3) . ?  
O180 W44 1.87(4) . ?  
O180 W49 2.01(4) . ?  
O181 W45 1.86(4) . ?  
O181 W50 1.91(4) . ?  
O182 W46 1.74(4) . ?  
O182 W50 2.05(4) . ?  
O183 W50 1.75(4) . ?  
O183 W49 2.09(4) . ?  
O184 W49 1.91(3) . ?  
O184 W48 1.96(3) . ?  
O185 W50 1.89(4) . ?  
O185 W48 1.92(4) . ?  
O186 W50 1.62(4) . ?  
O187 W49 1.67(3) . ?  
O188 W48 1.58(4) . ?  
O189 Dy5 2.51(3) . ?  
O190 W61 1.77(3) . ?  
O190 Dy5 2.35(3) . ?  
O191 Dy5 2.41(3) . ?  
O192 W41 2.06(3) . ?  
O192 Dy5 2.35(3) . ?  
O192 Cs3 3.12(3) . ?

O193 W51 1.77 (3) . ?  
O193 Dy5 2.27 (3) . ?  
O194 W41 1.98 (3) . ?  
O194 Dy5 2.28 (3) . ?  
O194 Na1 2.96 (3) . ?  
O195 W51 1.84 (3) . ?  
O195 Dy6 2.20 (3) . ?  
O196 W51 1.91 (3) . ?  
O196 W46 1.93 (3) . ?  
O197 W51 1.87 (3) . ?  
O197 W53 1.93 (3) . ?  
O198 W52 1.85 (4) . ?  
O198 W51 2.06 (4) . ?  
O199 W52 1.77 (5) . ?  
O200 W52 1.83 (4) . ?  
O200 W57 1.96 (5) . ?  
O201 W57 1.73 (4) . ?  
O201 Dy6 2.36 (4) . ?  
O202 W57 1.63 (6) . ?  
O204 W56 1.75 (4) . ?  
O204 Dy6 2.34 (4) . ?  
O205 W56 1.68 (5) . ?  
O206 W56 1.69 (5) . ?  
O206 W55 2.13 (5) . ?  
O207 W55 1.52 (3) . ?  
O207 Cs5 3.46 (3) . ?  
O208 W55 1.71 (3) . ?  
O208 Cs4 3.31 (4) . ?  
O209 W54 1.82 (4) . ?  
O209 W55 2.02 (4) . ?  
O209 Cs5 3.40 (4) . ?  
O210 W54 1.70 (3) . ?  
O210 Na22 2.95 (4) . ?  
O210 K3 2.99 (4) 1\_455 ?  
O210 Cs5 3.25 (4) . ?  
O211 W54 1.75 (3) . ?  
O211 Cs5 3.75 (3) . ?  
O212 W53 1.85 (3) . ?  
O212 W54 2.05 (3) . ?  
O213 W53 1.70 (4) . ?  
O214 As6 1.81 (4) . ?  
O214 W54 2.26 (3) . ?  
O214 W53 2.33 (4) . ?  
O214 W59 2.37 (4) . ?  
O215 As6 1.83 (3) . ?  
O215 W57 2.26 (3) . ?  
O215 W52 2.36 (3) . ?  
O215 W58 2.39 (4) . ?  
O216 As6 1.74 (4) . ?  
O216 W56 2.25 (4) . ?  
O216 W55 2.38 (4) . ?  
O216 W60 2.41 (4) . ?  
O217 W60 1.78 (4) . ?  
O217 W55 2.15 (4) . ?  
O218 W59 1.88 (3) . ?  
O218 W54 2.06 (4) . ?  
O218 K3 2.70 (3) 1\_455 ?  
O219 W53 1.86 (4) . ?  
O219 W59 1.98 (4) . ?  
O220 W52 1.79 (4) . ?  
O220 W58 2.15 (4) . ?  
O221 W58 1.88 (5) . ?  
O221 W57 2.00 (5) . ?  
O222 W60 1.89 (4) . ?

O222 W56 2.06 (4) . ?  
O224 W58 1.85 (4) . ?  
O224 W59 1.97 (4) . ?  
O225 W59 1.82 (4) . ?  
O225 W60 2.01 (4) . ?  
O226 W59 1.86 (5) . ?  
O226 Na5 2.23 (6) 1\_465 ?  
O227 W58 1.71 (5) . ?  
O228 W60 1.68 (5) . ?  
O228 Na6 2.92 (5) 1\_465 ?  
O229 Dy6 2.36 (3) . ?  
O229 Cs4 3.15 (3) . ?  
O230 Dy6 2.37 (4) . ?  
O231 W64 1.77 (4) . ?  
O231 Dy6 2.40 (4) . ?  
O231 Cs4 3.66 (3) . ?  
O232 Dy6 2.46 (3) . ?  
O232 Na16 2.95 (4) 2\_546 ?  
O233 W62 1.92 (3) . ?  
O233 W63 1.97 (3) . ?  
O234 W64 1.81 (4) . ?  
O234 W62 2.18 (4) . ?  
O234 Na16 2.88 (4) 2\_546 ?  
O235 W64 1.95 (3) . ?  
O235 W65 1.97 (3) . ?  
O236 W65 1.75 (3) . ?  
O236 Dy7 2.37 (3) . ?  
O237 W65 1.68 (3) . ?  
O237 Dy7 2.40 (3) 2\_546 ?  
O238 W65 1.87 (4) . ?  
O238 W66 2.02 (4) . ?  
O239 W66 1.74 (4) . ?  
O239 Dy7 2.38 (4) . ?  
O240 W66 1.68 (4) . ?  
O240 Na16 2.55 (4) . ?  
O241 W67 1.82 (4) . ?  
O241 W66 1.98 (4) . ?  
O242 W67 1.80 (3) . ?  
O242 W72 2.06 (3) . ?  
O243 W67 1.72 (6) . ?  
O244 W68 1.86 (4) . ?  
O244 W67 1.96 (4) . ?  
O245 W72 1.86 (3) . ?  
O245 W68 1.95 (3) . ?  
O246 W68 1.66 (4) . ?  
O247 W63 1.90 (4) . ?  
O247 W68 2.00 (4) . ?  
O248 W63 1.67 (4) . ?  
O248 Cs4 3.44 (4) . ?  
O249 W71 1.84 (4) . ?  
O249 W64 2.08 (4) . ?  
O250 W71 1.80 (3) . ?  
O250 W65 2.11 (3) . ?  
O251 W70 1.83 (4) . ?  
O251 W66 2.07 (4) . ?  
O252 W70 1.86 (5) . ?  
O252 W67 1.92 (4) . ?  
O253 W68 1.86 (4) . ?  
O253 W69 2.00 (5) . ?  
O254 W63 1.86 (4) . ?  
O254 W69 2.02 (4) . ?  
O255 W69 1.76 (4) . ?  
O255 W71 2.05 (4) . ?  
O256 W71 1.88 (4) . ?

O256 W70 1.93 (4) . ?  
O257 W69 1.84 (4) . ?  
O257 W70 2.01 (3) . ?  
O258 W70 1.70 (5) . ?  
O259 W71 1.37 (5) . ?  
O260 W69 1.69 (4) . ?  
O261 W72 1.68 (3) . ?  
O261 Dy7 2.32 (4) . ?  
O262 W62 1.78 (3) . ?  
O262 Dy7 2.32 (3) . ?  
O263 Dy7 2.36 (4) . ?  
O263 Na16 2.80 (4) 2\_546 ?  
O264 Dy7 2.47 (4) . ?  
O265 W82 1.75 (4) . ?  
O265 Dy7 2.42 (4) . ?  
O266 W82 1.95 (7) . ?  
O267 W82 2.30 (8) . ?  
O268 W77 1.79 (4) . ?  
O268 W82 2.02 (4) . ?  
O269 W77 1.72 (4) . ?  
O270 W77 1.87 (3) . ?  
O270 W76 1.96 (3) . ?  
O271 W76 1.89 (4) . ?  
O271 W82 2.13 (3) . ?  
O272 W82 1.81 (3) . ?  
O272 Dy8 2.31 (3) . ?  
O273 W76 1.58 (4) . ?  
O274 W75 1.86 (4) . ?  
O274 W76 1.98 (3) . ?  
O275 W75 1.77 (3) . ?  
O275 Dy8 2.36 (3) . ?  
O276 W75 1.69 (3) . ?  
O276 Na7 2.51 (4) . ?  
O277 W75 1.89 (4) . ?  
O277 W74 1.93 (3) . ?  
O278 W74 1.77 (4) . ?  
O278 Dy8 2.34 (4) . ?  
O279 W74 1.69 (4) . ?  
O280 W74 1.95 (4) . ?  
O280 W73 1.97 (4) . ?  
O281 W73 1.89 (3) . ?  
O281 W72 1.99 (3) . ?  
O282 W73 1.64 (4) . ?  
O283 W78 1.85 (4) . ?  
O283 W73 1.97 (3) . ?  
O284 W72 1.88 (3) . ?  
O284 W78 1.95 (3) . ?  
O285 W78 1.67 (5) . ?  
O285 Na11 2.75 (6) . ?  
O286 W78 1.90 (5) . ?  
O286 W77 1.96 (5) . ?  
O287 As8 1.83 (3) . ?  
O287 W78 2.24 (4) . ?  
O287 W77 2.29 (3) . ?  
O287 W79 2.31 (4) . ?  
O288 As8 1.80 (3) . ?  
O288 W75 2.27 (3) . ?  
O288 W81 2.34 (3) . ?  
O288 W76 2.40 (3) . ?  
O289 As8 1.75 (3) . ?  
O289 W74 2.31 (3) . ?  
O289 W80 2.39 (3) . ?  
O289 W73 2.43 (3) . ?  
O290 W80 1.86 (3) . ?

O290 W74 2.05 (4) . ?  
O291 W73 1.91 (4) . ?  
O291 W80 1.95 (3) . ?  
O292 W78 1.83 (3) . ?  
O292 W79 1.98 (3) . ?  
O293 W79 1.85 (4) . ?  
O293 W77 2.05 (4) . ?  
O294 W81 1.82 (3) . ?  
O294 W75 2.03 (3) . ?  
O295 W81 1.82 (3) . ?  
O295 W76 2.03 (3) . ?  
O296 W81 1.87 (3) . ?  
O296 W80 1.96 (3) . ?  
O297 W79 1.85 (4) . ?  
O297 W81 1.98 (4) . ?  
O298 W79 1.81 (3) . ?  
O298 W80 2.01 (3) . ?  
O299 W79 1.74 (4) . ?  
O299 Na10 2.99 (5) . ?  
O300 W81 1.73 (3) . ?  
O300 Na5 2.38 (4) . ?  
O301 W80 1.71 (4) . ?  
O302 W72 1.73 (3) . ?  
O302 Dy8 2.28 (3) . ?  
O303 Dy8 2.42 (3) . ?  
O304 Dy8 2.43 (4) . ?  
O304 Cs3 3.15 (3) . ?  
O305 Dy8 2.35 (4) . ?  
O305 Cs3 3.41 (4) . ?  
O306 W62 1.72 (3) . ?  
O306 Dy8 2.45 (3) . ?  
O306 Cs3 3.31 (3) . ?  
O307 W61 1.84 (3) . ?  
O307 W62 2.13 (3) . ?  
O307 Cs3 3.26 (3) . ?  
O308 W62 1.89 (3) . ?  
O308 W61 2.11 (3) . ?  
O308 Na16 2.86 (3) 2\_546 ?  
O309 W63 1.88 (4) . ?  
O309 W64 1.96 (3) . ?  
O309 Cs4 3.41 (3) . ?  
O319 Cs5 3.64 (8) . ?  
O320 Na3 2.88 (4) 1\_455 ?  
O320 Na9 2.89 (5) 2 ?  
O321 Na3 2.92 (4) 1\_455 ?  
O324 Cs1 3.338 (4) . ?  
O324 Cs1 3.338 (4) 2 ?  
O326 Cs1 3.57 (7) . ?  
O334 Na6 1.88 (4) . ?  
O335 Na15 1.86 (6) 1\_545 ?  
O337 Na11 0.81 (6) . ?  
O340 Na9 2.30 (7) 2 ?  
O343 Na10 2.94 (6) . ?  
O345 Na5 2.46 (6) . ?  
O347 Na5 2.41 (6) . ?  
O349 Na7 2.37 (6) . ?  
O350 Na7 2.39 (6) . ?  
O351 Na7 2.44 (6) . ?  
O354 Na13 0.67 (5) . ?  
O357 Na4 3.02 (7) 1\_655 ?  
O358 K3 2.75 (7) . ?  
O359 Cs2 3.38 (6) . ?  
O361 As7 1.86 (3) . ?  
O361 W65 2.25 (3) . ?



O361 W64 2.30(3) . ?  
O361 W71 2.36(3) . ?  
O362 As7 1.87(4) . ?  
O362 W66 2.19(3) . ?  
O362 W70 2.36(4) . ?  
O362 W67 2.43(4) . ?  
O363 As7 1.80(3) . ?  
O363 W69 2.27(3) . ?  
O363 W63 2.34(3) . ?  
O363 W68 2.35(3) . ?  
O366 Na4 2.83(5) 1\_655 ?  
O368 Cs4 3.00(3) . ?  
O373 W46 1.60(4) . ?  
O375 Na5 2.40(5) . ?  
O377 Na22 2.78(4) . ?  
O379 Na8 3.00(4) . ?  
O386 Cs4 3.25(10) . ?  
O389 Cs6 3.08(7) . ?  
O392 Na13 2.78(6) 2 ?  
O397 Na5 2.26(6) 1\_465 ?  
O397 K3 3.21(6) 1\_455 ?  
O398 Na13 2.94(5) . ?  
O398 Na12 2.96(4) 1\_565 ?  
O399 Cs4 3.36(4) . ?  
O400 Na15 3.01(5) . ?  
Na2 Na2 2.57(5) 2\_645 ?  
Na3 O139 2.80(4) 1\_655 ?  
Na3 O320 2.88(4) 1\_655 ?  
Na3 O321 2.92(4) 1\_655 ?  
Na3 Na22 4.16(2) 1\_655 ?  
Na4 O366 2.83(5) 1\_455 ?  
Na4 O21 2.90(4) 1\_455 ?  
Na4 O357 3.02(7) 1\_455 ?  
Na4 Cs5 5.00(3) . ?  
Na5 O226 2.23(6) 1\_645 ?  
Na5 O397 2.26(6) 1\_645 ?  
Na5 K3 4.40(4) 1\_545 ?  
Na6 O228 2.92(5) 1\_645 ?  
Na6 Na10 3.58(4) . ?  
Na7 Na8 2.37(4) . ?  
Na9 O340 2.30(7) 2 ?  
Na9 O320 2.89(5) 2 ?  
Na9 Cs1 4.72(3) . ?  
Na12 O398 2.96(4) 1\_545 ?  
Na13 O392 2.78(6) 2 ?  
Na13 O86 2.81(5) 1\_565 ?  
Na15 O335 1.86(6) 1\_565 ?  
Na22 Cs5 2.93(2) . ?  
Na22 O15 3.02(4) 1\_455 ?  
Na22 Na3 4.16(2) 1\_455 ?  
Na16 O263 2.80(4) 2\_546 ?  
Na16 O308 2.86(3) 2\_546 ?  
Na16 O234 2.88(4) 2\_546 ?  
Na16 O169 2.92(3) 2\_546 ?  
Na16 O232 2.95(4) 2\_546 ?  
Na16 W61 3.707(16) 2\_546 ?  
Na16 Dy6 3.963(16) 2\_546 ?  
Cs6 O19 3.25(4) 2\_655 ?  
Cs6 O13 3.45(4) 2\_655 ?  
Cs6 O18 3.46(4) 2\_655 ?  
Cs6 W23 4.141(8) . ?  
Cs6 W22 4.188(9) . ?  
Cs6 W8 4.219(8) 2\_655 ?  
K3 O218 2.70(3) 1\_655 ?

K3 O210 2.99(4) 1\_655 ?  
K3 O397 3.21(6) 1\_655 ?  
K3 W5 3.761(15) . ?  
K3 W54 3.806(14) 1\_655 ?  
K3 W3 3.850(15) . ?  
K3 W2 3.928(15) . ?  
Cs1 O66 3.17(3) 2 ?  
Cs1 O69 3.30(3) 2 ?  
Cs1 O70 3.32(3) 2 ?  
Cs1 W18 4.047(4) 2 ?  
Cs4 W63 4.257(7) . ?  
Cs4 W64 4.344(7) . ?  
Cs4 Cs5 5.085(9) . ?  
Cs5 O5 3.09(4) 1\_455 ?  
Cs5 W54 3.883(8) . ?  
Cs5 W35 3.993(7) . ?  
Cs5 W55 4.027(7) . ?  
Dy5 W41 3.567(3) . ?  
Dy6 Na16 3.963(16) 2\_546 ?  
Dy7 O237 2.40(3) 2\_546 ?  
W1 Cs6 4.304(8) 2\_655 ?  
W7 Cs6 4.341(8) 2\_655 ?  
W8 Cs6 4.219(8) 2\_655 ?  
W18 Cs1 4.047(4) 2 ?  
W19 Cs1 4.155(4) 2 ?  
W54 K3 3.806(14) 1\_455 ?  
W56 O203 1.793(4) . ?  
W57 O203 2.169(4) . ?  
W58 O223 2.278(5) . ?  
W60 O223 1.601(4) . ?  
W61 W62 3.202(3) . ?  
W61 Na16 3.707(16) 2\_546 ?

loop\_  
\_geom\_angle\_atom\_site\_label\_1  
\_geom\_angle\_atom\_site\_label\_2  
\_geom\_angle\_atom\_site\_label\_3  
\_geom\_angle  
\_geom\_angle\_site\_symmetry\_1  
\_geom\_angle\_site\_symmetry\_3  
\_geom\_angle\_publ\_flag

W5 O5 Cs5 144.8(18) . 1\_655 ?  
W2 O10 W1 151.6(17) . . ?  
W3 O11 W2 147.7(15) . . ?  
W3 O11 K3 105.5(12) . . ?  
W2 O11 K3 102.8(12) . . ?  
W1 O12 W3 145.8(17) . . ?  
W1 O13 W7 119.2(18) . . ?  
W1 O13 Cs6 103.1(14) . 2\_655 ?  
W7 O13 Cs6 101.3(11) . 2\_655 ?  
W2 O14 W6 119.3(18) . . ?  
W2 O14 Na3 134.3(15) . . ?  
W6 O14 Na3 104.8(14) . . ?  
W2 O15 W5 122.5(16) . . ?  
W2 O15 K3 112.4(16) . . ?  
W5 O15 K3 101.8(13) . . ?  
W2 O15 Na22 107.2(14) . 1\_655 ?  
W5 O15 Na22 104.1(15) . 1\_655 ?  
K3 O15 Na22 107.8(11) . 1\_655 ?  
W3 O16 W4 120.6(17) . . ?  
W3 O16 K3 102.0(14) . . ?  
W4 O16 K3 102.4(15) . . ?  
W9 O17 W3 122.4(18) . . ?  
W8 O18 W1 126(2) . . ?

W8 O18 Cs6 101.4(13) . . 2\_655 ?  
W1 O18 Cs6 100.9(13) . . 2\_655 ?  
W7 O19 W8 117.5(16) . . ?  
W7 O19 Cs6 111.0(14) . . 2\_655 ?  
W8 O19 Cs6 105.0(14) . . 2\_655 ?  
W7 O20 W6 145.8(19) . . ?  
W6 O21 W5 120.6(15) . . ?  
W6 O21 Na4 100.8(12) . . 1\_655 ?  
W5 O21 Na4 134.3(14) . . 1\_655 ?  
W4 O22 W5 144.1(15) . . ?  
W4 O22 K3 112.7(13) . . ?  
W5 O22 K3 103.0(12) . . ?  
W4 O23 W9 121.8(18) . . ?  
W9 O24 W8 148.4(19) . . ?  
As1 O25 W9 118.1(13) . . ?  
As1 O25 W4 113.3(16) . . ?  
W9 O25 W4 94.6(11) . . ?  
As1 O25 W3 132.9(16) . . ?  
W9 O25 W3 93.6(12) . . ?  
W4 O25 W3 96.3(10) . . ?  
As1 O26 W6 119.1(13) . . ?  
As1 O26 W2 134.1(16) . . ?  
W6 O26 W2 94.2(10) . . ?  
As1 O26 W5 116.4(14) . . ?  
W6 O26 W5 91.6(11) . . ?  
W2 O26 W5 91.2(9) . . ?  
As1 O27 W7 114.6(18) . . ?  
As1 O27 W8 125.4(17) . . ?  
W7 O27 W8 92.8(11) . . ?  
As1 O27 W1 129.4(16) . . ?  
W7 O27 W1 93.4(12) . . ?  
W8 O27 W1 92.0(13) . . ?  
W7 O28 Dy1 158.7(18) . . ?  
W6 O29 Dy1 153.2(17) . . ?  
W10 O32 W9 152.2(17) . . ?  
W8 O33 W10 156.0(18) . . ?  
W10 O34 Dy1 163.6(14) . . ?  
W10 O35 Dy2 175.2(16) . . ?  
Dy1 O37 Cs2 127.5(13) . . ?  
Dy1 O38 Cs6 130.5(13) . . ?  
W11 O39 W10 154.1(15) . . ?  
W12 O40 W10 154.0(19) . . ?  
W12 O41 W11 145.5(17) . . ?  
W11 O42 W16 118.7(15) . . ?  
W16 O43 W15 147.7(17) . . ?  
W14 O44 W15 123.4(15) . . ?  
W13 O45 W14 143.8(15) . . ?  
W13 O45 Cs1 99.9(12) . . ?  
W14 O45 Cs1 99.6(12) . . ?  
W13 O46 W12 121.7(15) . . ?  
As2 O47 W12 119.3(13) . . ?  
As2 O47 W18 132.9(15) . . ?  
W12 O47 W18 96.5(11) . . ?  
As2 O47 W13 111.6(14) . . ?  
W12 O47 W13 95.3(11) . . ?  
W18 O47 W13 92.7(10) . . ?  
As2 O48 W16 115.7(15) . . ?  
As2 O48 W17 133.5(15) . . ?  
W16 O48 W17 94.3(12) . . ?  
As2 O48 W11 120.2(14) . . ?  
W16 O48 W11 92.3(11) . . ?  
W17 O48 W11 91.2(11) . . ?  
As2 O49 W15 114.5(12) . . ?  
As2 O49 W14 120.5(14) . . ?

W15 O49 W14 92.9(10) . . ?  
As2 O49 W19 132.8(14) . . ?  
W15 O49 W19 94.4(10) . . ?  
W14 O49 W19 92.6(9) . . ?  
W16 O52 Dy2 157.2(19) . . ?  
W15 O53 Dy2 158.3(19) . . ?  
W14 O55 W20 151.5(17) . . ?  
W14 O56 Cs1 107.9(15) . . ?  
W13 O57 W20 151.2(16) . . ?  
W13 O58 Cs1 107.2(13) . . ?  
W18 O60 W12 122.1(15) . . ?  
W17 O61 W11 123.5(16) . . ?  
W17 O62 W16 119.2(18) . . ?  
W19 O63 W15 120.2(16) . . ?  
W19 O64 W14 115.8(12) . . ?  
W13 O65 W18 119.4(12) . . ?  
W18 O66 W19 145.7(16) . . ?  
W18 O66 Cs1 106.3(11) . 2 ?  
W19 O66 Cs1 102.4(10) . 2 ?  
W17 O67 W19 156.5(19) . . ?  
W18 O68 W17 147.0(16) . . ?  
W19 O69 Cs1 108.3(15) . 2 ?  
W18 O70 Cs1 102.2(14) . 2 ?  
W20 O72 Dy1 162.4(17) . . ?  
W20 O72 Cs2 90.0(11) . . ?  
Dy1 O72 Cs2 105.3(8) . . ?  
W20 O73 Dy2 171.1(16) . . ?  
Dy2 O76 Cs2 117.5(10) . . ?  
W23 O77 Dy1 162.0(16) . . ?  
W22 O78 W23 149.6(16) . . ?  
W22 O78 Cs6 106.5(10) . . ?  
W23 O78 Cs6 103.6(10) . . ?  
W22 O79 Cs1 126.3(14) . . ?  
W22 O80 W21 154(2) . . ?  
W22 O81 W27 118.3(13) . . ?  
W27 O82 W31 152.9(19) . . ?  
W27 O84 W26 145.8(17) . . ?  
W26 O85 W31 154.6(17) . . ?  
W26 O86 Na13 130(2) . 1\_545 ?  
W25 O87 W26 121.8(16) . . ?  
W25 O88 Dy3 159.6(18) . . ?  
W25 O89 Na7 148.7(18) . . ?  
W24 O90 W25 144.0(16) . . ?  
W24 O91 Dy3 156.1(16) . . ?  
W24 O91 Cs2 105.2(11) . . ?  
Dy3 O91 Cs2 98.6(9) . . ?  
W23 O93 W24 115.6(14) . . ?  
W23 O93 Cs2 95.2(10) . . ?  
W24 O93 Cs2 106.3(11) . . ?  
W29 O94 W23 120.1(15) . . ?  
W29 O94 Cs6 112.6(12) . . ?  
W23 O94 Cs6 100.6(10) . . ?  
W22 O95 W28 119.9(13) . . ?  
W22 O95 Cs6 102.7(11) . . ?  
W28 O95 Cs6 102.5(9) . . ?  
W27 O96 W28 120.1(15) . . ?  
W30 O97 W26 121.9(18) . . ?  
W30 O98 W25 120.5(15) . . ?  
W29 O99 W24 122.4(15) . . ?  
As3 O100 W25 115.1(14) . . ?  
As3 O100 W30 134.1(15) . . ?  
W25 O100 W30 94.7(10) . . ?  
As3 O100 W26 120.3(13) . . ?  
W25 O100 W26 92.6(11) . . ?

W30 O100 W26 90.3 (10) . . ?  
As3 O101 W28 137.3 (14) . . ?  
As3 O101 W22 113.7 (14) . . ?  
W28 O101 W22 94.5 (10) . . ?  
As3 O101 W27 115.2 (13) . . ?  
W28 O101 W27 94.2 (9) . . ?  
W22 O101 W27 91.7 (9) . . ?  
As3 O102 W24 112.5 (12) . . ?  
As3 O102 W23 119.8 (13) . . ?  
W24 O102 W23 93.8 (10) . . ?  
As3 O102 W29 132.7 (14) . . ?  
W24 O102 W29 95.3 (9) . . ?  
W23 O102 W29 94.3 (10) . . ?  
W28 O103 W30 152.7 (15) . . ?  
W28 O104 W29 146.4 (17) . . ?  
W28 O104 Cs6 108.5 (11) . . ?  
W29 O104 Cs6 104.3 (11) . . ?  
W30 O105 W29 156.4 (16) . . ?  
W21 O109 W20 117.3 (12) . . ?  
W21 O109 Cs2 107.5 (10) . . ?  
W20 O109 Cs2 105.4 (9) . . ?  
W20 O110 W21 100.1 (12) . . ?  
W20 O110 Cs1 126.5 (12) . . ?  
W21 O110 Cs1 109.8 (10) . . ?  
W21 O111 Dy3 169.7 (17) . . ?  
W21 O111 Cs2 91.9 (11) . . ?  
Dy3 O111 Cs2 93.6 (8) . . ?  
Dy3 O112 Cs3 93.8 (8) . . ?  
W43 O113 Dy3 149.6 (16) . . ?  
W43 O113 Cs2 102.3 (12) . . ?  
Dy3 O113 Cs2 108.1 (9) . . ?  
W31 O114 Dy3 173.0 (17) . . ?  
W41 O115 Dy3 155.7 (14) . . ?  
W41 O115 Cs3 99.2 (11) . . ?  
Dy3 O115 Cs3 97.6 (8) . . ?  
Dy4 O116 Na1 123.3 (10) . . ?  
W31 O117 Dy4 170.8 (16) . . ?  
W41 O118 Dy4 172.4 (16) . . ?  
W33 O119 W32 146.5 (18) . . ?  
W21 O120 Dy4 156.5 (16) . . ?  
Dy4 O121 Cs1 121.5 (10) . . ?  
W36 O123 Dy4 160.4 (15) . . ?  
W37 O124 Dy4 156.9 (17) . . ?  
W32 O125 W31 154.9 (16) . . ?  
W33 O126 W31 153.9 (17) . . ?  
W34 O127 W41 157.6 (16) . . ?  
W34 O127 Cs3 89.1 (9) . . ?  
W41 O127 Cs3 84.0 (8) . . ?  
W35 O128 W41 151.8 (16) . . ?  
W35 O129 Cs5 105.3 (11) . . ?  
W35 O129 Cs4 132.1 (15) . . ?  
Cs5 O129 Cs4 103.0 (8) . . ?  
W34 O130 W35 149.5 (18) . . ?  
W34 O131 Cs3 121.8 (17) . . ?  
W34 O132 W33 119.1 (14) . . ?  
W52 O134 W53 149 (3) . . ?  
W32 O136 W37 123.6 (15) . . ?  
W37 O138 W36 143.1 (15) . . ?  
W36 O139 Na3 132.8 (16) . 1\_455 ?  
W36 O139 Na4 109.5 (16) . . ?  
Na3 O139 Na4 112.8 (12) 1\_455 . ?  
W36 O139 Na22 104.1 (13) . . ?  
Na3 O139 Na22 91.1 (11) 1\_455 . ?  
Na4 O139 Na22 96.3 (11) . . ?

W35 O140 W36 119.3(14) . . ?  
W35 O140 Na22 140.2(12) . . ?  
W36 O140 Na22 97.6(11) . . ?  
W35 O140 Cs5 97.8(10) . . ?  
W36 O140 Cs5 138.7(11) . . ?  
Na22 O140 Cs5 55.5(6) . . ?  
As4 O141 W36 114.0(14) . . ?  
As4 O141 W39 132.7(15) . . ?  
W36 O141 W39 95.6(10) . . ?  
As4 O141 W35 118.8(12) . . ?  
W36 O141 W35 93.8(11) . . ?  
W39 O141 W35 93.6(10) . . ?  
As4 O142 W33 116.4(13) . . ?  
As4 O142 W34 115.1(14) . . ?  
W33 O142 W34 94.8(9) . . ?  
As4 O142 W40 133.6(13) . . ?  
W33 O142 W40 94.3(11) . . ?  
W34 O142 W40 94.5(10) . . ?  
As4 O143 W37 114.2(15) . . ?  
As4 O143 W38 133.4(15) . . ?  
W37 O143 W38 94.4(10) . . ?  
As4 O143 W32 122.2(13) . . ?  
W37 O143 W32 91.9(10) . . ?  
W38 O143 W32 90.8(10) . . ?  
W38 O144 W32 126(2) . . ?  
W38 O145 W37 122.5(15) . . ?  
W36 O146 W39 128.8(18) . . ?  
W35 O147 W39 124.5(18) . . ?  
W34 O148 W40 123.1(17) . . ?  
W33 O149 W40 120.2(19) . . ?  
W40 O150 W38 144.9(18) . . ?  
W39 O151 W38 161.1(18) . . ?  
W40 O152 W39 148.3(19) . . ?  
Dy3 O156 Cs3 100.7(10) . . ?  
W23 O157 W21 154.3(18) . . ?  
W23 O157 Cs2 109.4(12) . . ?  
W21 O157 Cs2 95.3(10) . . ?  
W42 O158 Dy2 146.1(16) . . ?  
W42 O158 Na1 107.2(14) . . ?  
Dy2 O158 Na1 106.3(10) . . ?  
W42 O159 Dy5 156.5(18) . . ?  
W42 O160 W43 139.8(16) . . ?  
W42 O160 Cs2 122.0(12) . . ?  
W43 O160 Cs2 92.0(10) . . ?  
W43 O161 Dy5 161.6(18) . . ?  
W43 O161 Cs3 99.7(13) . . ?  
Dy5 O161 Cs3 98.7(9) . . ?  
W44 O162 W43 119.6(15) . . ?  
W44 O162 Cs3 96.5(10) . . ?  
W43 O162 Cs3 103.5(9) . . ?  
W44 O163 W61 152.1(17) . . ?  
W44 O163 Cs3 107.0(13) . . ?  
W61 O163 Cs3 99.7(10) . . ?  
W45 O165 W44 149.4(18) . . ?  
W61 O166 W45 155(2) . . ?  
W45 O168 W46 121.3(17) . . ?  
W61 O169 Dy6 158.3(18) . . ?  
W61 O169 Na16 100.9(13) . 2\_546 ?  
Dy6 O169 Na16 97.8(11) . 2\_546 ?  
W46 O170 W47 145.9(19) . . ?  
W47 O171 W51 153.6(19) . . ?  
W47 O172 Na15 148(3) . . ?  
W47 O173 W42 124.5(16) . . ?  
As5 O174 W45 116.5(18) . . ?

As5 O174 W46 114.4 (16) . . ?  
W45 O174 W46 95.1 (13) . . ?  
As5 O174 W50 133.6 (18) . . ?  
W45 O174 W50 95.4 (12) . . ?  
W46 O174 W50 93.8 (13) . . ?  
As5 O175 W43 115.5 (15) . . ?  
As5 O175 W44 117.2 (16) . . ?  
W43 O175 W44 94.9 (14) . . ?  
As5 O175 W49 132.9 (18) . . ?  
W43 O175 W49 95.3 (13) . . ?  
W44 O175 W49 92.9 (12) . . ?  
As5 O176 W42 117.0 (15) . . ?  
As5 O176 W47 122.1 (15) . . ?  
W42 O176 W47 96.2 (11) . . ?  
As5 O176 W48 129.5 (14) . . ?  
W42 O176 W48 94.7 (11) . . ?  
W47 O176 W48 89.3 (11) . . ?  
W47 O177 W48 126.4 (18) . . ?  
W48 O178 W42 117.7 (14) . . ?  
W49 O179 W43 118.7 (16) . . ?  
W49 O179 Cs2 141.7 (15) . . ?  
W43 O179 Cs2 83.1 (9) . . ?  
W44 O180 W49 121.7 (19) . . ?  
W45 O181 W50 126.6 (18) . . ?  
W46 O182 W50 124 (2) . . ?  
W50 O183 W49 150 (3) . . ?  
W49 O184 W48 151.1 (16) . . ?  
W50 O185 W48 152 (2) . . ?  
W61 O190 Dy5 171 (2) . . ?  
W41 O192 Dy5 107.8 (12) . . ?  
W41 O192 Cs3 102.0 (10) . . ?  
Dy5 O192 Cs3 115.3 (9) . . ?  
W51 O193 Dy5 164.6 (19) . . ?  
W41 O194 Dy5 113.7 (13) . . ?  
W41 O194 Na1 125.4 (12) . . ?  
Dy5 O194 Na1 116.8 (11) . . ?  
W51 O195 Dy6 171.6 (16) . . ?  
W51 O196 W46 151 (2) . . ?  
W51 O197 W53 155.3 (19) . . ?  
W52 O198 W51 149.5 (19) . . ?  
W52 O200 W57 128 (2) . . ?  
W57 O201 Dy6 157 (2) . . ?  
W56 O204 Dy6 158 (2) . . ?  
W56 O206 W55 122 (3) . . ?  
W55 O207 Cs5 100.6 (15) . . ?  
W55 O208 Cs4 132.9 (15) . . ?  
W54 O209 W55 144 (2) . . ?  
W54 O209 Cs5 91.1 (14) . . ?  
W55 O209 Cs5 92.5 (14) . . ?  
W54 O210 Na22 147.1 (18) . . ?  
W54 O210 K3 105.3 (15) . 1\_455 ?  
Na22 O210 K3 104.4 (10) . 1\_455 ?  
W54 O210 Cs5 98.7 (14) . . ?  
Na22 O210 Cs5 56.1 (7) . . ?  
K3 O210 Cs5 113.3 (10) 1\_455 . ?  
W54 O211 Cs5 81.1 (10) . . ?  
W53 O212 W54 119.2 (17) . . ?  
As6 O214 W54 118.8 (19) . . ?  
As6 O214 W53 116.7 (16) . . ?  
W54 O214 W53 94.3 (13) . . ?  
As6 O214 W59 131.8 (18) . . ?  
W54 O214 W59 95.3 (12) . . ?  
W53 O214 W59 91.2 (14) . . ?  
As6 O215 W57 115.4 (18) . . ?

As6 O215 W52 124.0(17) . . ?  
W57 O215 W52 95.1(11) . . ?  
As6 O215 W58 128.4(16) . . ?  
W57 O215 W58 93.7(12) . . ?  
W52 O215 W58 92.1(13) . . ?  
As6 O216 W56 119(2) . . ?  
As6 O216 W55 118(2) . . ?  
W56 O216 W55 92.8(16) . . ?  
As6 O216 W60 133(2) . . ?  
W56 O216 W60 93.3(16) . . ?  
W55 O216 W60 91.2(14) . . ?  
W60 O217 W55 121.2(18) . . ?  
W59 O218 W54 120.4(16) . . ?  
W59 O218 K3 133.9(17) . 1\_455 ?  
W54 O218 K3 105.3(14) . 1\_455 ?  
W53 O219 W59 122(2) . . ?  
W52 O220 W58 120(2) . . ?  
W58 O221 W57 122(2) . . ?  
W60 O222 W56 118(2) . . ?  
W58 O224 W59 153(3) . . ?  
W59 O225 W60 152(2) . . ?  
W59 O226 Na5 154(3) . 1\_465 ?  
W60 O228 Na6 169(2) . 1\_465 ?  
Dy6 O229 Cs4 128.9(12) . . ?  
W64 O231 Dy6 145.1(16) . . ?  
W64 O231 Cs4 100.6(13) . . ?  
Dy6 O231 Cs4 109.1(11) . . ?  
Dy6 O232 Na16 93.7(12) . 2\_546 ?  
W62 O233 W63 158(2) . . ?  
W64 O234 W62 154(2) . . ?  
W64 O234 Na16 104.6(16) . 2\_546 ?  
W62 O234 Na16 101.5(13) . 2\_546 ?  
W64 O235 W65 117.5(16) . . ?  
W65 O236 Dy7 158(2) . . ?  
W65 O237 Dy7 156(2) . 2\_546 ?  
W65 O238 W66 140(2) . . ?  
W66 O239 Dy7 159(2) . . ?  
W66 O240 Na16 139(2) . . ?  
W67 O241 W66 126(2) . . ?  
W67 O242 W72 156.7(19) . . ?  
W68 O244 W67 147(3) . . ?  
W72 O245 W68 156(2) . . ?  
W63 O247 W68 120.6(17) . . ?  
W63 O248 Cs4 107.7(16) . . ?  
W71 O249 W64 120(2) . . ?  
W71 O250 W65 120.5(17) . . ?  
W70 O251 W66 120(2) . . ?  
W70 O252 W67 130(3) . . ?  
W68 O253 W69 122(2) . . ?  
W63 O254 W69 122.2(17) . . ?  
W69 O255 W71 151(2) . . ?  
W71 O256 W70 158(2) . . ?  
W69 O257 W70 147(2) . . ?  
W72 O261 Dy7 172(2) . . ?  
W62 O262 Dy7 165(2) . . ?  
Dy7 O263 Na16 116.1(12) . 2\_546 ?  
W82 O265 Dy7 147(2) . . ?  
W77 O268 W82 149(2) . . ?  
W77 O270 W76 145.4(18) . . ?  
W76 O271 W82 148(2) . . ?  
W82 O272 Dy8 162(2) . . ?  
W75 O274 W76 123(2) . . ?  
W75 O275 Dy8 158.7(17) . . ?  
W75 O276 Na7 144(2) . . ?



W75 O277 W74 144 (2) . . ?  
W74 O278 Dy8 159.2 (19) . . ?  
W74 O280 W73 119.9 (18) . . ?  
W73 O281 W72 150.5 (16) . . ?  
W78 O283 W73 147 (2) . . ?  
W72 O284 W78 151.8 (19) . . ?  
W78 O285 Na11 128 (3) . . ?  
W78 O286 W77 122 (2) . . ?  
As8 O287 W78 118.3 (16) . . ?  
As8 O287 W77 113.2 (18) . . ?  
W78 O287 W77 96.1 (13) . . ?  
As8 O287 W79 131.3 (18) . . ?  
W78 O287 W79 95.5 (14) . . ?  
W77 O287 W79 95.2 (12) . . ?  
As8 O288 W75 115.6 (14) . . ?  
As8 O288 W81 134.0 (17) . . ?  
W75 O288 W81 94.2 (11) . . ?  
As8 O288 W76 118.9 (15) . . ?  
W75 O288 W76 92.5 (11) . . ?  
W81 O288 W76 91.9 (10) . . ?  
As8 O289 W74 115.4 (16) . . ?  
As8 O289 W80 132.6 (15) . . ?  
W74 O289 W80 92.5 (11) . . ?  
As8 O289 W73 124.0 (16) . . ?  
W74 O289 W73 91.7 (10) . . ?  
W80 O289 W73 90.2 (11) . . ?  
W80 O290 W74 120.6 (18) . . ?  
W73 O291 W80 125 (2) . . ?  
W78 O292 W79 124.0 (19) . . ?  
W79 O293 W77 120.9 (17) . . ?  
W81 O294 W75 122.5 (15) . . ?  
W81 O295 W76 124.2 (16) . . ?  
W81 O296 W80 155.8 (18) . . ?  
W79 O297 W81 150.4 (19) . . ?  
W79 O298 W80 150 (2) . . ?  
W79 O299 Na10 103.3 (18) . . ?  
W81 O300 Na5 139.2 (17) . . ?  
W72 O302 Dy8 169.5 (17) . . ?  
Dy8 O304 Cs3 98.0 (10) . . ?  
Dy8 O305 Cs3 92.9 (13) . . ?  
W62 O306 Dy8 154.0 (17) . . ?  
W62 O306 Cs3 110.7 (13) . . ?  
Dy8 O306 Cs3 93.6 (9) . . ?  
W61 O307 W62 107.3 (11) . . ?  
W61 O307 Cs3 102.1 (11) . . ?  
W62 O307 Cs3 101.3 (10) . . ?  
W62 O308 W61 106.0 (12) . . ?  
W62 O308 Na16 110.5 (13) . 2\_546 ?  
W61 O308 Na16 95.3 (11) . 2\_546 ?  
W63 O309 W64 143.8 (18) . . ?  
W63 O309 Cs4 103.6 (12) . . ?  
W64 O309 Cs4 104.9 (14) . . ?  
Na3 O320 Na9 94.3 (13) 1\_455 2 ?  
Cs1 O324 Cs1 180.00 (14) . 2 ?  
As7 O361 W65 114.0 (13) . . ?  
As7 O361 W64 118.7 (15) . . ?  
W65 O361 W64 94.9 (12) . . ?  
As7 O361 W71 132.5 (17) . . ?  
W65 O361 W71 94.9 (11) . . ?  
W64 O361 W71 93.9 (11) . . ?  
As7 O362 W66 114.9 (18) . . ?  
As7 O362 W70 130.5 (17) . . ?  
W66 O362 W70 96.2 (13) . . ?  
As7 O362 W67 121.7 (17) . . ?

W66 O362 W67 94.3(13) . . ?  
W70 O362 W67 91.1(13) . . ?  
As7 O363 W69 137.8(16) . . ?  
As7 O363 W63 114.6(15) . . ?  
W69 O363 W63 94.6(10) . . ?  
As7 O363 W68 113.5(14) . . ?  
W69 O363 W68 93.8(11) . . ?  
W63 O363 W68 92.5(10) . . ?  
Na5 O397 K3 106(2) 1\_465 1\_455 ?  
Na13 O398 Na12 127.2(14) . 1\_565 ?  
O116 Na1 O194 75.3(8) . . ?  
O116 Na1 O158 171.9(10) . . ?  
O194 Na1 O158 107.0(9) . . ?  
O139 Na3 O320 156.3(11) 1\_655 1\_655 ?  
O139 Na3 O14 93.1(11) 1\_655 . ?  
O320 Na3 O14 104.0(12) 1\_655 . ?  
O139 Na3 O321 131.1(11) 1\_655 1\_655 ?  
O320 Na3 O321 70.3(11) 1\_655 1\_655 ?  
O14 Na3 O321 74.6(11) . 1\_655 ?  
O139 Na3 Na22 46.5(7) 1\_655 1\_655 ?  
O320 Na3 Na22 128.8(9) 1\_655 1\_655 ?  
O14 Na3 Na22 63.1(8) . 1\_655 ?  
O321 Na3 Na22 136.3(10) 1\_655 1\_655 ?  
O366 Na4 O139 150.6(16) 1\_455 . ?  
O366 Na4 O21 68.6(13) 1\_455 1\_455 ?  
O139 Na4 O21 85.0(11) . 1\_455 ?  
O366 Na4 O357 127.0(17) 1\_455 1\_455 ?  
O139 Na4 O357 81.9(14) . 1\_455 ?  
O21 Na4 O357 142.6(16) 1\_455 1\_455 ?  
O366 Na4 Cs5 88.8(10) 1\_455 . ?  
O139 Na4 Cs5 69.5(8) . . ?  
O21 Na4 Cs5 70.0(7) 1\_455 . ?  
O357 Na4 Cs5 134.9(13) 1\_455 . ?  
O226 Na5 O397 92(2) 1\_645 1\_645 ?  
O226 Na5 O300 84.0(18) 1\_645 . ?  
O397 Na5 O300 176(2) 1\_645 . ?  
O226 Na5 O375 95(2) 1\_645 . ?  
O397 Na5 O375 97(2) 1\_645 . ?  
O300 Na5 O375 82.8(16) . . ?  
O226 Na5 O347 172(2) 1\_645 . ?  
O397 Na5 O347 94(2) 1\_645 . ?  
O300 Na5 O347 89.7(18) . . ?  
O375 Na5 O347 89.6(18) . . ?  
O226 Na5 O345 87(2) 1\_645 . ?  
O397 Na5 O345 94(2) 1\_645 . ?  
O300 Na5 O345 86.4(17) . . ?  
O375 Na5 O345 169(2) . . ?  
O347 Na5 O345 87(2) . . ?  
O226 Na5 K3 69.8(15) 1\_645 1\_545 ?  
O397 Na5 K3 44.4(17) 1\_645 1\_545 ?  
O300 Na5 K3 132.9(14) . 1\_545 ?  
O375 Na5 K3 62.1(14) . 1\_545 ?  
O347 Na5 K3 118.3(15) . 1\_545 ?  
O345 Na5 K3 128.5(16) . 1\_545 ?  
O334 Na6 O228 84.1(16) . 1\_645 ?  
O334 Na6 Na10 102.5(14) . . ?  
O228 Na6 Na10 55.3(12) 1\_645 . ?  
O349 Na7 Na8 91.7(18) . . ?  
O349 Na7 O350 97(2) . . ?  
Na8 Na7 O350 167(2) . . ?  
O349 Na7 O89 164.9(19) . . ?  
Na8 Na7 O89 83.9(14) . . ?  
O350 Na7 O89 90.3(19) . . ?  
O349 Na7 O351 83(2) . . ?

Na8 Na7 O351 92.8(17) . . ?  
O350 Na7 O351 98(2) . . ?  
O89 Na7 O351 82.4(17) . . ?  
O349 Na7 O276 99.0(17) . . ?  
Na8 Na7 O276 87.2(15) . . ?  
O350 Na7 O276 81.2(17) . . ?  
O89 Na7 O276 95.3(15) . . ?  
O351 Na7 O276 178(2) . . ?  
Na7 Na8 O379 98.1(14) . . ?  
O340 Na9 O320 120.7(18) 2 2 ?  
O340 Na9 Cs1 74.7(15) 2 . ?  
O320 Na9 Cs1 74.0(9) 2 . ?  
O343 Na10 O299 104.4(16) . . ?  
O343 Na10 Na6 165.1(15) . . ?  
O299 Na10 Na6 60.8(10) . . ?  
O337 Na11 O285 120(6) . . ?  
O354 Na13 O392 95(7) . 2 ?  
O354 Na13 O86 90(6) . 1\_565 ?  
O392 Na13 O86 125.0(18) 2 1\_565 ?  
O354 Na13 O398 25(5) . . ?  
O392 Na13 O398 114.4(18) 2 . ?  
O86 Na13 O398 66.8(13) 1\_565 . ?  
O335 Na15 O172 124(2) 1\_565 . ?  
O335 Na15 O400 62(2) 1\_565 . ?  
O172 Na15 O400 65.4(14) . . ?  
O377 Na22 Cs5 99.6(9) . . ?  
O377 Na22 O210 87.0(10) . . ?  
Cs5 Na22 O210 67.0(8) . . ?  
O377 Na22 O139 89.5(11) . . ?  
Cs5 Na22 O139 108.0(10) . . ?  
O210 Na22 O139 173.3(12) . . ?  
O377 Na22 O15 141.8(13) . 1\_455 ?  
Cs5 Na22 O15 101.3(9) . 1\_455 ?  
O210 Na22 O15 72.5(10) . 1\_455 ?  
O139 Na22 O15 113.5(10) . 1\_455 ?  
O377 Na22 O140 63.2(10) . . ?  
Cs5 Na22 O140 66.4(7) . . ?  
O210 Na22 O140 117.8(10) . . ?  
O139 Na22 O140 55.5(9) . . ?  
O15 Na22 O140 155.0(11) 1\_455 . ?  
O377 Na22 Na3 89.9(8) . 1\_455 ?  
Cs5 Na22 Na3 149.2(8) . 1\_455 ?  
O210 Na22 Na3 143.3(10) . 1\_455 ?  
O139 Na22 Na3 42.4(7) . 1\_455 ?  
O15 Na22 Na3 88.2(8) 1\_455 1\_455 ?  
O140 Na22 Na3 92.9(7) . 1\_455 ?  
O240 Na16 O263 85.4(12) . 2\_546 ?  
O240 Na16 O308 134.2(12) . 2\_546 ?  
O263 Na16 O308 68.7(9) 2\_546 2\_546 ?  
O240 Na16 O234 164.2(14) . 2\_546 ?  
O263 Na16 O234 90.5(11) 2\_546 2\_546 ?  
O308 Na16 O234 56.8(10) 2\_546 2\_546 ?  
O240 Na16 O169 131.1(14) . 2\_546 ?  
O263 Na16 O169 129.6(11) 2\_546 2\_546 ?  
O308 Na16 O169 60.9(9) 2\_546 2\_546 ?  
O234 Na16 O169 62.1(10) 2\_546 2\_546 ?  
O240 Na16 O232 77.8(13) . 2\_546 ?  
O263 Na16 O232 147.0(11) 2\_546 2\_546 ?  
O308 Na16 O232 103.8(11) 2\_546 2\_546 ?  
O234 Na16 O232 112.7(11) 2\_546 2\_546 ?  
O169 Na16 O232 54.2(10) 2\_546 2\_546 ?  
O240 Na16 W61 133.3(11) . 2\_546 ?  
O263 Na16 W61 102.3(8) 2\_546 2\_546 ?  
O308 Na16 W61 34.6(6) 2\_546 2\_546 ?

O234 Na16 W61 62.4(8) 2\_546 2\_546 ?  
O169 Na16 W61 28.3(6) 2\_546 2\_546 ?  
O232 Na16 W61 71.2(7) 2\_546 2\_546 ?  
O240 Na16 Dy6 109.2(11) . 2\_546 ?  
O263 Na16 Dy6 164.0(8) 2\_546 2\_546 ?  
O308 Na16 Dy6 95.9(7) 2\_546 2\_546 ?  
O234 Na16 Dy6 77.0(8) 2\_546 2\_546 ?  
O169 Na16 Dy6 35.2(7) 2\_546 2\_546 ?  
O232 Na16 Dy6 38.2(7) 2\_546 2\_546 ?  
W61 Na16 Dy6 63.2(2) 2\_546 2\_546 ?  
O389 Cs6 O94 110.6(13) . . ?  
O389 Cs6 O78 72.6(13) . . ?  
O94 Cs6 O78 49.9(7) . . ?  
O389 Cs6 O19 84.5(14) . 2\_655 ?  
O94 Cs6 O19 131.6(8) . 2\_655 ?  
O78 Cs6 O19 153.0(9) . 2\_655 ?  
O389 Cs6 O104 125.1(14) . . ?  
O94 Cs6 O104 47.4(7) . . ?  
O78 Cs6 O104 55.5(7) . . ?  
O19 Cs6 O104 150.1(9) 2\_655 . ?  
O389 Cs6 O95 85.7(13) . . ?  
O94 Cs6 O95 81.7(7) . . ?  
O78 Cs6 O95 47.5(7) . . ?  
O19 Cs6 O95 146.5(7) 2\_655 . ?  
O104 Cs6 O95 47.3(6) . . ?  
O389 Cs6 O38 65.1(13) . . ?  
O94 Cs6 O38 73.8(8) . . ?  
O78 Cs6 O38 85.1(8) . . ?  
O19 Cs6 O38 72.1(9) 2\_655 . ?  
O104 Cs6 O38 120.9(8) . . ?  
O95 Cs6 O38 130.9(8) . . ?  
O389 Cs6 O13 50.1(13) . 2\_655 ?  
O94 Cs6 O13 157.7(9) . 2\_655 ?  
O78 Cs6 O13 119.8(8) . 2\_655 ?  
O19 Cs6 O13 46.2(8) 2\_655 2\_655 ?  
O104 Cs6 O13 149.3(8) . 2\_655 ?  
O95 Cs6 O13 105.0(7) . 2\_655 ?  
O38 Cs6 O13 86.3(9) . 2\_655 ?  
O389 Cs6 O18 95.2(13) . 2\_655 ?  
O94 Cs6 O18 154.0(9) . 2\_655 ?  
O78 Cs6 O18 148.9(8) . 2\_655 ?  
O19 Cs6 O18 45.0(9) 2\_655 2\_655 ?  
O104 Cs6 O18 119.5(9) . 2\_655 ?  
O95 Cs6 O18 104.4(8) . 2\_655 ?  
O38 Cs6 O18 116.3(9) . 2\_655 ?  
O13 Cs6 O18 45.9(9) 2\_655 2\_655 ?  
O389 Cs6 W23 82.3(12) . . ?  
O94 Cs6 W23 29.2(5) . . ?  
O78 Cs6 W23 26.9(4) . . ?  
O19 Cs6 W23 137.7(7) 2\_655 . ?  
O104 Cs6 W23 59.9(5) . . ?  
O95 Cs6 W23 71.9(5) . . ?  
O38 Cs6 W23 65.9(6) . . ?  
O13 Cs6 W23 132.1(7) 2\_655 . ?  
O18 Cs6 W23 175.7(6) 2\_655 . ?  
O389 Cs6 W22 68.3(12) . . ?  
O94 Cs6 W22 72.0(5) . . ?  
O78 Cs6 W22 25.6(4) . . ?  
O19 Cs6 W22 150.3(7) 2\_655 . ?  
O104 Cs6 W22 57.4(5) . . ?  
O95 Cs6 W22 25.9(5) . . ?  
O38 Cs6 W22 105.0(6) . . ?  
O13 Cs6 W22 104.6(6) 2\_655 . ?  
O18 Cs6 W22 123.3(6) 2\_655 . ?

W23 Cs6 W22 52.42(10) . . ?  
O389 Cs6 W8 103.2(12) . 2\_655 ?  
O94 Cs6 W8 136.6(6) . 2\_655 ?  
O78 Cs6 W8 173.5(5) . 2\_655 ?  
O19 Cs6 W8 27.0(7) 2\_655 2\_655 ?  
O104 Cs6 W8 126.6(6) . 2\_655 ?  
O95 Cs6 W8 128.2(5) . 2\_655 ?  
O38 Cs6 W8 97.7(6) . 2\_655 ?  
O13 Cs6 W8 54.8(6) 2\_655 2\_655 ?  
O18 Cs6 W8 25.1(6) 2\_655 2\_655 ?  
W23 Cs6 W8 159.0(2) . 2\_655 ?  
W22 Cs6 W8 148.5(2) . 2\_655 ?  
O218 K3 O358 66.7(14) 1\_655 . ?  
O218 K3 O15 131.5(12) 1\_655 . ?  
O358 K3 O15 110.6(16) . . ?  
O218 K3 O22 142.5(12) 1\_655 . ?  
O358 K3 O22 76.6(14) . . ?  
O15 K3 O22 55.5(9) . . ?  
O218 K3 O11 151.9(12) 1\_655 . ?  
O358 K3 O11 141.1(14) . . ?  
O15 K3 O11 53.8(10) . . ?  
O22 K3 O11 65.5(9) . . ?  
O218 K3 O16 137.2(12) 1\_655 . ?  
O358 K3 O16 96.9(15) . . ?  
O15 K3 O16 91.0(10) . . ?  
O22 K3 O16 52.7(10) . . ?  
O11 K3 O16 53.4(9) . . ?  
O218 K3 O210 56.6(10) 1\_655 1\_655 ?  
O358 K3 O210 88.6(15) . 1\_655 ?  
O15 K3 O210 75.2(10) . 1\_655 ?  
O22 K3 O210 117.0(11) . 1\_655 ?  
O11 K3 O210 115.5(10) . 1\_655 ?  
O16 K3 O210 166.1(11) . 1\_655 ?  
O218 K3 O397 81.4(13) 1\_655 1\_655 ?  
O358 K3 O397 120.1(18) . 1\_655 ?  
O15 K3 O397 128.1(14) . 1\_655 ?  
O22 K3 O397 125.8(13) . 1\_655 ?  
O11 K3 O397 78.7(12) . 1\_655 ?  
O16 K3 O397 73.4(12) . 1\_655 ?  
O210 K3 O397 114.7(13) 1\_655 1\_655 ?  
O218 K3 W5 132.0(10) 1\_655 . ?  
O358 K3 W5 82.5(13) . . ?  
O15 K3 W5 31.6(7) . . ?  
O22 K3 W5 29.9(7) . . ?  
O11 K3 W5 69.1(7) . . ?  
O16 K3 W5 80.0(7) . . ?  
O210 K3 W5 88.2(7) 1\_655 . ?  
O397 K3 W5 146.5(11) 1\_655 . ?  
O218 K3 W54 31.4(8) 1\_655 1\_655 ?  
O358 K3 W54 74.9(13) . 1\_655 ?  
O15 K3 W54 100.1(8) . 1\_655 ?  
O22 K3 W54 131.2(9) . 1\_655 ?  
O11 K3 W54 137.8(8) . 1\_655 ?  
O16 K3 W54 168.0(9) . 1\_655 ?  
O210 K3 W54 25.4(6) 1\_655 1\_655 ?  
O397 K3 W54 102.8(10) 1\_655 1\_655 ?  
W5 K3 W54 107.2(4) . 1\_655 ?  
O218 K3 W3 146.6(10) 1\_655 . ?  
O358 K3 W3 125.3(13) . . ?  
O15 K3 W3 77.1(8) . . ?  
O22 K3 W3 64.0(7) . . ?  
O11 K3 W3 27.3(6) . . ?  
O16 K3 W3 28.8(7) . . ?  
O210 K3 W3 142.3(8) 1\_655 . ?

O397 K3 W3 65.6(10) 1\_655 . ?  
W5 K3 W3 81.3(2) . . ?  
W54 K3 W3 159.5(5) 1\_655 . ?  
O218 K3 W2 140.3(9) 1\_655 . ?  
O358 K3 W2 135.4(14) . . ?  
O15 K3 W2 26.5(8) . . ?  
O22 K3 W2 66.0(6) . . ?  
O11 K3 W2 30.6(6) . . ?  
O16 K3 W2 79.6(7) . . ?  
O210 K3 W2 87.6(7) 1\_655 . ?  
O397 K3 W2 101.7(11) 1\_655 . ?  
W5 K3 W2 52.95(19) . . ?  
W54 K3 W2 112.5(4) 1\_655 . ?  
W3 K3 W2 57.3(2) . . ?  
O26 As1 O27 101.1(14) . . ?  
O26 As1 O25 100.3(13) . . ?  
O27 As1 O25 97.0(16) . . ?  
O49 As2 O48 100.4(13) . . ?  
O49 As2 O47 99.8(12) . . ?  
O48 As2 O47 94.3(14) . . ?  
O101 As3 O100 94.8(13) . . ?  
O101 As3 O102 95.1(12) . . ?  
O100 As3 O102 100.0(12) . . ?  
O143 As4 O142 95.7(13) . . ?  
O143 As4 O141 100.5(12) . . ?  
O142 As4 O141 97.6(13) . . ?  
O176 As5 O174 99.1(15) . . ?  
O176 As5 O175 99.7(15) . . ?  
O174 As5 O175 96.4(14) . . ?  
O216 As6 O214 99.1(18) . . ?  
O216 As6 O215 102.1(18) . . ?  
O214 As6 O215 99.9(16) . . ?  
O363 As7 O361 94.8(13) . . ?  
O363 As7 O362 96.0(15) . . ?  
O361 As7 O362 100.7(15) . . ?  
O289 As8 O288 101.0(14) . . ?  
O289 As8 O287 96.0(15) . . ?  
O288 As8 O287 99.4(14) . . ?  
O66 Cs1 O79 129.4(8) 2 . ?  
O66 Cs1 O58 116.6(8) 2 . ?  
O79 Cs1 O58 63.7(8) . . ?  
O66 Cs1 O121 106.3(7) 2 . ?  
O79 Cs1 O121 82.5(7) . . ?  
O58 Cs1 O121 136.1(7) . . ?  
O66 Cs1 O56 107.1(8) 2 . ?  
O79 Cs1 O56 123.0(8) . . ?  
O58 Cs1 O56 100.2(9) . . ?  
O121 Cs1 O56 74.4(8) . . ?  
O66 Cs1 O45 113.3(8) 2 . ?  
O79 Cs1 O45 103.8(8) . . ?  
O58 Cs1 O45 51.2(8) . . ?  
O121 Cs1 O45 119.1(7) . . ?  
O56 Cs1 O45 51.1(9) . . ?  
O66 Cs1 O69 51.2(8) 2 2 ?  
O79 Cs1 O69 81.0(8) . 2 ?  
O58 Cs1 O69 82.6(8) . 2 ?  
O121 Cs1 O69 120.6(8) . 2 ?  
O56 Cs1 O69 154.8(8) . 2 ?  
O45 Cs1 O69 120.2(8) . 2 ?  
O66 Cs1 O70 49.1(8) 2 2 ?  
O79 Cs1 O70 135.0(9) . 2 ?  
O58 Cs1 O70 160.2(8) . 2 ?  
O121 Cs1 O70 62.2(7) . 2 ?  
O56 Cs1 O70 75.5(8) . 2 ?

O45 Cs1 O70 117.2(8) . 2 ?  
O69 Cs1 O70 93.3(8) 2 2 ?  
O66 Cs1 O324 61.2(6) 2 . ?  
O79 Cs1 O324 139.0(6) . . ?  
O58 Cs1 O324 76.3(6) . . ?  
O121 Cs1 O324 136.7(5) . . ?  
O56 Cs1 O324 71.3(7) . . ?  
O45 Cs1 O324 52.2(5) . . ?  
O69 Cs1 O324 85.3(6) 2 . ?  
O70 Cs1 O324 84.0(6) 2 . ?  
O66 Cs1 O326 71.3(11) 2 . ?  
O79 Cs1 O326 65.9(11) . . ?  
O58 Cs1 O326 115.7(12) . . ?  
O121 Cs1 O326 69.0(11) . . ?  
O56 Cs1 O326 140.8(13) . . ?  
O45 Cs1 O326 166.9(11) . . ?  
O69 Cs1 O326 52.2(12) 2 . ?  
O70 Cs1 O326 75.4(11) 2 . ?  
O324 Cs1 O326 130.3(10) . . ?  
O66 Cs1 O110 177.2(8) 2 . ?  
O79 Cs1 O110 50.8(7) . . ?  
O58 Cs1 O110 60.6(7) . . ?  
O121 Cs1 O110 76.5(6) . . ?  
O56 Cs1 O110 73.2(7) . . ?  
O45 Cs1 O110 64.5(7) . . ?  
O69 Cs1 O110 127.7(7) 2 . ?  
O70 Cs1 O110 133.3(7) 2 . ?  
O324 Cs1 O110 116.6(5) . . ?  
O326 Cs1 O110 110.3(11) . . ?  
O66 Cs1 W18 25.0(5) 2 2 ?  
O79 Cs1 W18 140.8(6) . 2 ?  
O58 Cs1 W18 138.5(5) . 2 ?  
O121 Cs1 W18 85.4(4) . 2 ?  
O56 Cs1 W18 88.7(6) . 2 ?  
O45 Cs1 W18 114.6(5) . 2 ?  
O69 Cs1 W18 73.7(6) 2 2 ?  
O70 Cs1 W18 24.5(5) 2 2 ?  
O324 Cs1 W18 68.40(6) . 2 ?  
O326 Cs1 W18 75.0(9) . 2 ?  
O110 Cs1 W18 157.1(5) . 2 ?  
O113 Cs2 O37 175.2(8) . . ?  
O113 Cs2 O109 89.7(7) . . ?  
O37 Cs2 O109 94.4(8) . . ?  
O113 Cs2 O157 98.0(8) . . ?  
O37 Cs2 O157 82.5(9) . . ?  
O109 Cs2 O157 50.7(7) . . ?  
O113 Cs2 O160 53.5(8) . . ?  
O37 Cs2 O160 128.7(9) . . ?  
O109 Cs2 O160 93.7(7) . . ?  
O157 Cs2 O160 137.4(7) . . ?  
O113 Cs2 O359 97.1(12) . . ?  
O37 Cs2 O359 78.5(13) . . ?  
O109 Cs2 O359 167.2(12) . . ?  
O157 Cs2 O359 117.3(12) . . ?  
O160 Cs2 O359 99.0(12) . . ?  
O113 Cs2 O93 100.7(7) . . ?  
O37 Cs2 O93 76.0(9) . . ?  
O109 Cs2 O93 99.2(6) . . ?  
O157 Cs2 O93 48.5(7) . . ?  
O160 Cs2 O93 151.2(8) . . ?  
O359 Cs2 O93 69.0(12) . . ?  
O113 Cs2 O76 122.3(7) . . ?  
O37 Cs2 O76 60.7(8) . . ?  
O109 Cs2 O76 87.4(7) . . ?

0157 Cs2 O76 122.5(8) . . ?  
0160 Cs2 O76 69.2(8) . . ?  
0359 Cs2 O76 98.0(13) . . ?  
093 Cs2 O76 136.6(7) . . ?  
0113 Cs2 O179 49.3(7) . . ?  
037 Cs2 O179 128.3(8) . . ?  
0109 Cs2 O179 131.9(7) . . ?  
0157 Cs2 O179 141.6(8) . . ?  
0160 Cs2 O179 44.4(7) . . ?  
0359 Cs2 O179 59.5(12) . . ?  
093 Cs2 O179 110.8(7) . . ?  
076 Cs2 O179 94.8(7) . . ?  
0113 Cs2 O91 54.5(7) . . ?  
037 Cs2 O91 122.6(8) . . ?  
0109 Cs2 O91 92.0(6) . . ?  
0157 Cs2 O91 59.1(7) . . ?  
0160 Cs2 O91 107.6(7) . . ?  
0359 Cs2 O91 83.2(12) . . ?  
093 Cs2 O91 46.7(7) . . ?  
076 Cs2 O91 176.7(7) . . ?  
0179 Cs2 O91 83.1(7) . . ?  
0113 Cs2 O111 55.3(6) . . ?  
037 Cs2 O111 126.5(7) . . ?  
0109 Cs2 O111 45.8(7) . . ?  
0157 Cs2 O111 45.9(7) . . ?  
0160 Cs2 O111 93.6(7) . . ?  
0359 Cs2 O111 131.6(13) . . ?  
093 Cs2 O111 77.8(7) . . ?  
076 Cs2 O111 130.0(6) . . ?  
0179 Cs2 O111 104.5(7) . . ?  
091 Cs2 O111 48.5(6) . . ?  
0113 Cs2 O72 137.8(6) . . ?  
037 Cs2 O72 45.7(7) . . ?  
0109 Cs2 O72 49.4(6) . . ?  
0157 Cs2 O72 50.8(8) . . ?  
0160 Cs2 O72 127.1(7) . . ?  
0359 Cs2 O72 121.3(12) . . ?  
093 Cs2 O72 79.8(7) . . ?  
076 Cs2 O72 72.4(7) . . ?  
0179 Cs2 O72 167.3(7) . . ?  
091 Cs2 O72 109.6(6) . . ?  
0111 Cs2 O72 84.3(6) . . ?  
0131 Cs3 O163 131.1(9) . . ?  
0131 Cs3 O192 68.2(8) . . ?  
0163 Cs3 O192 89.1(7) . . ?  
0131 Cs3 O304 124.0(10) . . ?  
0163 Cs3 O304 80.4(9) . . ?  
0192 Cs3 O304 167.5(8) . . ?  
0131 Cs3 O156 80.1(8) . . ?  
0163 Cs3 O156 146.2(8) . . ?  
0192 Cs3 O156 92.8(7) . . ?  
0304 Cs3 O156 92.1(8) . . ?  
0131 Cs3 O307 76.8(8) . . ?  
0163 Cs3 O307 55.4(7) . . ?  
0192 Cs3 O307 76.0(7) . . ?  
0304 Cs3 O307 103.1(8) . . ?  
0156 Cs3 O307 156.7(7) . . ?  
0131 Cs3 O306 88.3(8) . . ?  
0163 Cs3 O306 71.2(8) . . ?  
0192 Cs3 O306 126.9(7) . . ?  
0304 Cs3 O306 55.9(8) . . ?  
0156 Cs3 O306 130.5(8) . . ?  
0307 Cs3 O306 51.9(7) . . ?  
0131 Cs3 O162 167.8(8) . . ?



O163 Cs3 O162 49.3 (7) . . ?  
O192 Cs3 O162 100.2 (7) . . ?  
O304 Cs3 O162 67.7 (8) . . ?  
O156 Cs3 O162 97.3 (7) . . ?  
O307 Cs3 O162 104.7 (7) . . ?  
O306 Cs3 O162 102.1 (7) . . ?  
O131 Cs3 O115 89.3 (8) . . ?  
O163 Cs3 O115 110.0 (8) . . ?  
O192 Cs3 O115 51.5 (7) . . ?  
O304 Cs3 O115 126.1 (8) . . ?  
O156 Cs3 O115 49.5 (7) . . ?  
O307 Cs3 O115 126.9 (7) . . ?  
O306 Cs3 O115 177.6 (7) . . ?  
O162 Cs3 O115 80.1 (6) . . ?  
O131 Cs3 O305 81.1 (9) . . ?  
O163 Cs3 O305 125.8 (8) . . ?  
O192 Cs3 O305 144.3 (8) . . ?  
O304 Cs3 O305 47.6 (9) . . ?  
O156 Cs3 O305 63.3 (9) . . ?  
O307 Cs3 O305 115.2 (9) . . ?  
O306 Cs3 O305 67.5 (9) . . ?  
O162 Cs3 O305 108.5 (8) . . ?  
O115 Cs3 O305 112.7 (8) . . ?  
O131 Cs3 O112 129.5 (8) . . ?  
O163 Cs3 O112 98.8 (7) . . ?  
O192 Cs3 O112 112.4 (7) . . ?  
O304 Cs3 O112 63.1 (8) . . ?  
O156 Cs3 O112 49.6 (7) . . ?  
O307 Cs3 O112 153.6 (7) . . ?  
O306 Cs3 O112 119.0 (7) . . ?  
O162 Cs3 O112 50.1 (7) . . ?  
O115 Cs3 O112 63.1 (6) . . ?  
O305 Cs3 O112 73.4 (9) . . ?  
O131 Cs3 O161 121.5 (8) . . ?  
O163 Cs3 O161 56.7 (7) . . ?  
O192 Cs3 O161 53.3 (7) . . ?  
O304 Cs3 O161 114.5 (8) . . ?  
O156 Cs3 O161 98.6 (8) . . ?  
O307 Cs3 O161 91.1 (7) . . ?  
O306 Cs3 O161 127.6 (7) . . ?  
O162 Cs3 O161 46.9 (6) . . ?  
O115 Cs3 O161 53.5 (6) . . ?  
O305 Cs3 O161 149.7 (8) . . ?  
O112 Cs3 O161 76.4 (7) . . ?  
O368 Cs4 O229 68.6 (9) . . ?  
O368 Cs4 O386 161 (2) . . ?  
O229 Cs4 O386 115 (2) . . ?  
O368 Cs4 O208 104.2 (9) . . ?  
O229 Cs4 O208 47.9 (7) . . ?  
O386 Cs4 O208 70 (2) . . ?  
O368 Cs4 O129 60.3 (8) . . ?  
O229 Cs4 O129 82.0 (8) . . ?  
O386 Cs4 O129 101 (2) . . ?  
O208 Cs4 O129 72.8 (8) . . ?  
O368 Cs4 O399 79.8 (9) . . ?  
O229 Cs4 O399 145.9 (8) . . ?  
O386 Cs4 O399 92 (2) . . ?  
O208 Cs4 O399 135.3 (8) . . ?  
O129 Cs4 O399 71.3 (8) . . ?  
O368 Cs4 O309 74.8 (9) . . ?  
O229 Cs4 O309 91.3 (8) . . ?  
O386 Cs4 O309 123 (2) . . ?  
O208 Cs4 O309 132.0 (8) . . ?  
O129 Cs4 O309 134.0 (8) . . ?

O399 Cs4 O309 92.4 (9) . . ?  
O368 Cs4 O248 51.5 (10) . . ?  
O229 Cs4 O248 111.2 (8) . . ?  
O386 Cs4 O248 133 (2) . . ?  
O208 Cs4 O248 155.5 (9) . . ?  
O129 Cs4 O248 93.7 (8) . . ?  
O399 Cs4 O248 52.0 (8) . . ?  
O309 Cs4 O248 46.8 (8) . . ?  
O368 Cs4 O231 81.9 (8) . . ?  
O229 Cs4 O231 47.8 (8) . . ?  
O386 Cs4 O231 114.4 (19) . . ?  
O208 Cs4 O231 82.7 (8) . . ?  
O129 Cs4 O231 126.5 (8) . . ?  
O399 Cs4 O231 140.9 (8) . . ?  
O309 Cs4 O231 49.3 (8) . . ?  
O248 Cs4 O231 89.8 (8) . . ?  
O368 Cs4 W63 63.6 (7) . . ?  
O229 Cs4 W63 106.2 (6) . . ?  
O386 Cs4 W63 129 (2) . . ?  
O208 Cs4 W63 153.4 (5) . . ?  
O129 Cs4 W63 114.7 (6) . . ?  
O399 Cs4 W63 68.5 (6) . . ?  
O309 Cs4 W63 25.4 (6) . . ?  
O248 Cs4 W63 22.0 (6) . . ?  
O231 Cs4 W63 72.4 (6) . . ?  
O368 Cs4 W64 79.7 (6) . . ?  
O229 Cs4 W64 69.1 (5) . . ?  
O386 Cs4 W64 119.1 (19) . . ?  
O208 Cs4 W64 106.1 (5) . . ?  
O129 Cs4 W64 137.3 (5) . . ?  
O399 Cs4 W64 118.2 (6) . . ?  
O309 Cs4 W64 25.8 (6) . . ?  
O248 Cs4 W64 69.8 (6) . . ?  
O231 Cs4 W64 23.6 (6) . . ?  
W63 Cs4 W64 50.16 (8) . . ?  
O368 Cs4 Cs5 96.2 (7) . . ?  
O229 Cs4 Cs5 84.4 (6) . . ?  
O386 Cs4 Cs5 66 (2) . . ?  
O208 Cs4 Cs5 48.6 (5) . . ?  
O129 Cs4 Cs5 37.6 (5) . . ?  
O399 Cs4 Cs5 86.8 (6) . . ?  
O309 Cs4 Cs5 171.0 (6) . . ?  
O248 Cs4 Cs5 127.9 (6) . . ?  
O231 Cs4 Cs5 129.5 (6) . . ?  
W63 Cs4 Cs5 149.88 (18) . . ?  
W64 Cs4 Cs5 152.95 (19) . . ?  
Na22 Cs5 O5 71.8 (8) . 1\_455 ?  
Na22 Cs5 O129 99.0 (7) . . ?  
O5 Cs5 O129 167.0 (9) 1\_455 . ?  
Na22 Cs5 O210 56.8 (7) . . ?  
O5 Cs5 O210 76.3 (9) 1\_455 . ?  
O129 Cs5 O210 106.8 (8) . . ?  
Na22 Cs5 O140 58.1 (7) . . ?  
O5 Cs5 O140 115.3 (8) 1\_455 . ?  
O129 Cs5 O140 51.8 (7) . . ?  
O210 Cs5 O140 103.6 (8) . . ?  
Na22 Cs5 O209 105.4 (8) . . ?  
O5 Cs5 O209 87.3 (9) 1\_455 . ?  
O129 Cs5 O209 104.3 (8) . . ?  
O210 Cs5 O209 48.6 (9) . . ?  
O140 Cs5 O209 140.9 (8) . . ?  
Na22 Cs5 O207 150.5 (8) . . ?  
O5 Cs5 O207 92.4 (9) 1\_455 . ?  
O129 Cs5 O207 99.7 (8) . . ?

O210 Cs5 O207 95.8(9) . . ?  
O140 Cs5 O207 149.1(8) . . ?  
O209 Cs5 O207 47.7(9) . . ?  
Na22 Cs5 O319 136.2(13) . . ?  
O5 Cs5 O319 113.8(13) 1\_455 . ?  
O129 Cs5 O319 66.2(13) . . ?  
O210 Cs5 O319 164.5(12) . . ?  
O140 Cs5 O319 83.0(13) . . ?  
O209 Cs5 O319 118.1(13) . . ?  
O207 Cs5 O319 72.8(13) . . ?  
Na22 Cs5 O211 87.0(7) . . ?  
O5 Cs5 O211 118.2(9) 1\_455 . ?  
O129 Cs5 O211 69.3(8) . . ?  
O210 Cs5 O211 45.0(8) . . ?  
O140 Cs5 O211 98.4(7) . . ?  
O209 Cs5 O211 42.9(8) . . ?  
O207 Cs5 O211 78.6(8) . . ?  
O319 Cs5 O211 120.8(12) . . ?  
Na22 Cs5 W54 80.7(5) . . ?  
O5 Cs5 W54 91.9(7) 1\_455 . ?  
O129 Cs5 W54 95.7(6) . . ?  
O210 Cs5 W54 25.6(5) . . ?  
O140 Cs5 W54 115.3(5) . . ?  
O209 Cs5 W54 27.9(7) . . ?  
O207 Cs5 W54 74.9(6) . . ?  
O319 Cs5 W54 139.0(11) . . ?  
O211 Cs5 W54 26.5(5) . . ?  
Na22 Cs5 W35 82.9(5) . . ?  
O5 Cs5 W35 142.5(7) 1\_455 . ?  
O129 Cs5 W35 24.5(5) . . ?  
O210 Cs5 W35 112.5(6) . . ?  
O140 Cs5 W35 28.3(5) . . ?  
O209 Cs5 W35 126.8(6) . . ?  
O207 Cs5 W35 121.3(6) . . ?  
O319 Cs5 W35 67.3(12) . . ?  
O211 Cs5 W35 86.7(5) . . ?  
W54 Cs5 W35 111.22(18) . . ?  
Na22 Cs5 W55 135.1(5) . . ?  
O5 Cs5 W55 100.7(7) 1\_455 . ?  
O129 Cs5 W55 92.4(5) . . ?  
O210 Cs5 W55 78.3(6) . . ?  
O140 Cs5 W55 143.6(5) . . ?  
O209 Cs5 W55 30.1(7) . . ?  
O207 Cs5 W55 21.8(6) . . ?  
O319 Cs5 W55 88.1(12) . . ?  
O211 Cs5 W55 56.9(5) . . ?  
W54 Cs5 W55 54.86(11) . . ?  
W35 Cs5 W55 116.76(17) . . ?  
O34 Dy1 O28 75.8(11) . . ?  
O34 Dy1 O36 88.2(10) . . ?  
O28 Dy1 O36 81.0(11) . . ?  
O34 Dy1 O38 146.1(12) . . ?  
O28 Dy1 O38 74.3(12) . . ?  
O36 Dy1 O38 71.9(11) . . ?  
O34 Dy1 O77 141.4(10) . . ?  
O28 Dy1 O77 142.8(11) . . ?  
O36 Dy1 O77 97.4(10) . . ?  
O38 Dy1 O77 70.1(11) . . ?  
O34 Dy1 O29 109.2(10) . . ?  
O28 Dy1 O29 74.3(11) . . ?  
O36 Dy1 O29 144.7(10) . . ?  
O38 Dy1 O29 77.3(10) . . ?  
O77 Dy1 O29 87.8(10) . . ?  
O34 Dy1 O37 70.9(11) . . ?

O28 Dy1 O37 123.4(12) . . ?  
O36 Dy1 O37 140.0(11) . . ?  
O38 Dy1 O37 140.5(12) . . ?  
O77 Dy1 O37 81.0(11) . . ?  
O29 Dy1 O37 75.3(10) . . ?  
O34 Dy1 O72 73.9(10) . . ?  
O28 Dy1 O72 140.6(11) . . ?  
O36 Dy1 O72 73.6(10) . . ?  
O38 Dy1 O72 123.1(11) . . ?  
O77 Dy1 O72 71.3(10) . . ?  
O29 Dy1 O72 140.0(10) . . ?  
O37 Dy1 O72 68.1(10) . . ?  
O35 Dy2 O73 68.3(11) . . ?  
O35 Dy2 O52 77.0(12) . . ?  
O73 Dy2 O52 121.0(11) . . ?  
O35 Dy2 O74 140.7(12) . . ?  
O73 Dy2 O74 150.9(12) . . ?  
O52 Dy2 O74 76.1(13) . . ?  
O35 Dy2 O53 115.1(10) . . ?  
O73 Dy2 O53 80.3(11) . . ?  
O52 Dy2 O53 73.0(12) . . ?  
O74 Dy2 O53 83.4(11) . . ?  
O35 Dy2 O158 141.7(11) . . ?  
O73 Dy2 O158 82.7(10) . . ?  
O52 Dy2 O158 141.0(11) . . ?  
O74 Dy2 O158 71.4(12) . . ?  
O53 Dy2 O158 82.3(11) . . ?  
O35 Dy2 O75 71.5(12) . . ?  
O73 Dy2 O75 131.5(12) . . ?  
O52 Dy2 O75 73.2(13) . . ?  
O74 Dy2 O75 73.7(13) . . ?  
O53 Dy2 O75 142.7(13) . . ?  
O158 Dy2 O75 116.1(12) . . ?  
O35 Dy2 O76 78.9(10) . . ?  
O73 Dy2 O76 77.6(10) . . ?  
O52 Dy2 O76 140.0(11) . . ?  
O74 Dy2 O76 104.9(11) . . ?  
O53 Dy2 O76 146.8(11) . . ?  
O158 Dy2 O76 70.6(10) . . ?  
O75 Dy2 O76 69.1(12) . . ?  
O114 Dy3 O91 113.2(10) . . ?  
O114 Dy3 O115 83.7(10) . . ?  
O91 Dy3 O115 148.6(10) . . ?  
O114 Dy3 O112 139.3(11) . . ?  
O91 Dy3 O112 82.8(10) . . ?  
O115 Dy3 O112 101.7(9) . . ?  
O114 Dy3 O88 74.3(10) . . ?  
O91 Dy3 O88 72.3(10) . . ?  
O115 Dy3 O88 139.0(10) . . ?  
O112 Dy3 O88 75.9(10) . . ?  
O114 Dy3 O111 71.0(10) . . ?  
O91 Dy3 O111 79.3(9) . . ?  
O115 Dy3 O111 82.1(10) . . ?  
O112 Dy3 O111 149.5(10) . . ?  
O88 Dy3 O111 120.7(10) . . ?  
O114 Dy3 O113 146.2(10) . . ?  
O91 Dy3 O113 81.0(9) . . ?  
O115 Dy3 O113 71.7(9) . . ?  
O112 Dy3 O113 70.3(10) . . ?  
O88 Dy3 O113 139.1(9) . . ?  
O111 Dy3 O113 82.6(9) . . ?  
O114 Dy3 O156 72.4(10) . . ?  
O91 Dy3 O156 138.7(10) . . ?  
O115 Dy3 O156 70.2(10) . . ?

O112 Dy3 O156 71.9(10) . . ?  
O88 Dy3 O156 70.3(10) . . ?  
O111 Dy3 O156 135.8(9) . . ?  
O113 Dy3 O156 118.1(9) . . ?  
O114 Dy3 Cs3 109.4(7) . . ?  
O91 Dy3 Cs3 134.4(6) . . ?  
O115 Dy3 Cs3 50.5(6) . . ?  
O112 Dy3 Cs3 53.7(7) . . ?  
O88 Dy3 Cs3 105.1(8) . . ?  
O111 Dy3 Cs3 131.1(7) . . ?  
O113 Dy3 Cs3 72.5(7) . . ?  
O156 Dy3 Cs3 45.6(7) . . ?  
O114 Dy3 Cs2 124.6(8) . . ?  
O91 Dy3 Cs2 51.3(7) . . ?  
O115 Dy3 Cs2 97.3(7) . . ?  
O112 Dy3 Cs2 95.0(8) . . ?  
O88 Dy3 Cs2 123.7(8) . . ?  
O111 Dy3 Cs2 54.6(7) . . ?  
O113 Dy3 Cs2 40.8(6) . . ?  
O156 Dy3 Cs2 158.9(7) . . ?  
Cs3 Dy3 Cs2 113.32(8) . . ?  
O117 Dy4 O123 110.2(10) . . ?  
O117 Dy4 O124 73.5(10) . . ?  
O123 Dy4 O124 72.0(10) . . ?  
O117 Dy4 O118 68.0(10) . . ?  
O123 Dy4 O118 79.6(9) . . ?  
O124 Dy4 O118 119.4(11) . . ?  
O117 Dy4 O120 83.6(9) . . ?  
O123 Dy4 O120 148.1(9) . . ?  
O124 Dy4 O120 139.7(10) . . ?  
O118 Dy4 O120 79.6(9) . . ?  
O117 Dy4 O116 141.0(8) . . ?  
O123 Dy4 O116 75.0(10) . . ?  
O124 Dy4 O116 139.8(10) . . ?  
O118 Dy4 O116 75.4(10) . . ?  
O120 Dy4 O116 76.6(9) . . ?  
O117 Dy4 O122 144.2(9) . . ?  
O123 Dy4 O122 78.3(9) . . ?  
O124 Dy4 O122 76.8(10) . . ?  
O118 Dy4 O122 146.4(10) . . ?  
O120 Dy4 O122 107.6(9) . . ?  
O116 Dy4 O122 74.5(9) . . ?  
O117 Dy4 O121 75.3(9) . . ?  
O123 Dy4 O121 140.2(8) . . ?  
O124 Dy4 O121 72.2(10) . . ?  
O118 Dy4 O121 134.4(9) . . ?  
O120 Dy4 O121 70.1(8) . . ?  
O116 Dy4 O121 126.3(9) . . ?  
O122 Dy4 O121 76.9(9) . . ?  
O193 Dy5 O194 146.9(11) . . ?  
O193 Dy5 O192 147.4(11) . . ?  
O194 Dy5 O192 63.3(10) . . ?  
O193 Dy5 O190 71.0(12) . . ?  
O194 Dy5 O190 142.1(12) . . ?  
O192 Dy5 O190 80.1(11) . . ?  
O193 Dy5 O191 86.4(11) . . ?  
O194 Dy5 O191 97.6(10) . . ?  
O192 Dy5 O191 73.9(10) . . ?  
O190 Dy5 O191 80.6(11) . . ?  
O193 Dy5 O161 110.2(10) . . ?  
O194 Dy5 O161 82.2(9) . . ?  
O192 Dy5 O161 79.4(10) . . ?  
O190 Dy5 O161 81.5(11) . . ?  
O191 Dy5 O161 149.9(11) . . ?

O193 Dy5 O159 74.1 (12) . . ?  
O194 Dy5 O159 82.7 (10) . . ?  
O192 Dy5 O159 136.4 (10) . . ?  
O190 Dy5 O159 122.2 (11) . . ?  
O191 Dy5 O159 140.8 (11) . . ?  
O161 Dy5 O159 69.2 (11) . . ?  
O193 Dy5 O189 74.3 (11) . . ?  
O194 Dy5 O189 76.2 (10) . . ?  
O192 Dy5 O189 120.6 (9) . . ?  
O190 Dy5 O189 135.6 (11) . . ?  
O191 Dy5 O189 70.4 (11) . . ?  
O161 Dy5 O189 137.3 (10) . . ?  
O159 Dy5 O189 71.8 (11) . . ?  
O193 Dy5 W41 174.6 (8) . . ?  
O194 Dy5 W41 30.5 (8) . . ?  
O192 Dy5 W41 33.3 (6) . . ?  
O190 Dy5 W41 111.7 (9) . . ?  
O191 Dy5 W41 89.5 (8) . . ?  
O161 Dy5 W41 75.0 (7) . . ?  
O159 Dy5 W41 107.2 (8) . . ?  
O189 Dy5 W41 101.1 (7) . . ?  
O193 Dy5 Cs3 126.4 (8) . . ?  
O194 Dy5 Cs3 85.5 (7) . . ?  
O192 Dy5 Cs3 37.4 (6) . . ?  
O190 Dy5 Cs3 57.9 (9) . . ?  
O191 Dy5 Cs3 99.7 (8) . . ?  
O161 Dy5 Cs3 50.2 (8) . . ?  
O159 Dy5 Cs3 119.3 (8) . . ?  
O189 Dy5 Cs3 157.5 (7) . . ?  
W41 Dy5 Cs3 57.82 (6) . . ?  
O195 Dy6 O169 81.6 (12) . . ?  
O195 Dy6 O204 109.7 (12) . . ?  
O169 Dy6 O204 147.8 (12) . . ?  
O195 Dy6 O201 77.0 (13) . . ?  
O169 Dy6 O201 139.1 (12) . . ?  
O204 Dy6 O201 72.9 (13) . . ?  
O195 Dy6 O229 73.9 (11) . . ?  
O169 Dy6 O229 78.3 (10) . . ?  
O204 Dy6 O229 76.4 (11) . . ?  
O201 Dy6 O229 126.8 (12) . . ?  
O195 Dy6 O230 142.5 (13) . . ?  
O169 Dy6 O230 102.3 (12) . . ?  
O204 Dy6 O230 86.9 (13) . . ?  
O201 Dy6 O230 76.3 (14) . . ?  
O229 Dy6 O230 143.6 (13) . . ?  
O195 Dy6 O231 140.5 (11) . . ?  
O169 Dy6 O231 72.7 (11) . . ?  
O204 Dy6 O231 80.7 (12) . . ?  
O201 Dy6 O231 140.7 (12) . . ?  
O229 Dy6 O231 71.9 (11) . . ?  
O230 Dy6 O231 73.6 (13) . . ?  
O195 Dy6 O232 75.7 (11) . . ?  
O169 Dy6 O232 68.3 (11) . . ?  
O204 Dy6 O232 142.9 (12) . . ?  
O201 Dy6 O232 72.8 (12) . . ?  
O229 Dy6 O232 137.4 (11) . . ?  
O230 Dy6 O232 71.6 (12) . . ?  
O231 Dy6 O232 119.4 (11) . . ?  
O195 Dy6 Na16 111.5 (8) . 2\_546 ?  
O169 Dy6 Na16 47.0 (8) . 2\_546 ?  
O204 Dy6 Na16 138.4 (10) . 2\_546 ?  
O201 Dy6 Na16 111.2 (9) . 2\_546 ?  
O229 Dy6 Na16 120.6 (8) . 2\_546 ?  
O230 Dy6 Na16 56.4 (10) . 2\_546 ?

O231 Dy6 Na16 71.3 (8) . 2\_546 ?  
O232 Dy6 Na16 48.1 (9) . 2\_546 ?  
O261 Dy7 O262 68.4 (12) . . ?  
O261 Dy7 O263 137.2 (12) . . ?  
O262 Dy7 O263 75.1 (11) . . ?  
O261 Dy7 O236 117.4 (11) . . ?  
O262 Dy7 O236 83.7 (11) . . ?  
O263 Dy7 O236 78.8 (12) . . ?  
O261 Dy7 O239 73.9 (13) . . ?  
O262 Dy7 O239 117.7 (12) . . ?  
O263 Dy7 O239 145.8 (13) . . ?  
O236 Dy7 O239 71.9 (13) . . ?  
O261 Dy7 O237 141.3 (12) . 2\_546 ?  
O262 Dy7 O237 150.2 (12) . 2\_546 ?  
O263 Dy7 O237 76.5 (11) . 2\_546 ?  
O236 Dy7 O237 82.1 (11) . 2\_546 ?  
O239 Dy7 O237 82.4 (12) . 2\_546 ?  
O261 Dy7 O265 84.3 (12) . . ?  
O262 Dy7 O265 80.1 (11) . . ?  
O263 Dy7 O265 67.7 (12) . . ?  
O236 Dy7 O265 145.5 (13) . . ?  
O239 Dy7 O265 142.4 (13) . . ?  
O237 Dy7 O265 97.3 (11) 2\_546 . ?  
O261 Dy7 O264 70.2 (12) . . ?  
O262 Dy7 O264 131.3 (12) . . ?  
O263 Dy7 O264 124.9 (12) . . ?  
O236 Dy7 O264 139.1 (12) . . ?  
O239 Dy7 O264 72.5 (13) . . ?  
O237 Dy7 O264 73.8 (12) 2\_546 . ?  
O265 Dy7 O264 71.4 (13) . . ?  
O302 Dy8 O272 73.9 (12) . . ?  
O302 Dy8 O278 74.1 (12) . . ?  
O272 Dy8 O278 122.7 (12) . . ?  
O302 Dy8 O305 143.0 (13) . . ?  
O272 Dy8 O305 143.1 (14) . . ?  
O278 Dy8 O305 80.0 (13) . . ?  
O302 Dy8 O275 111.4 (10) . . ?  
O272 Dy8 O275 78.1 (11) . . ?  
O278 Dy8 O275 71.3 (11) . . ?  
O305 Dy8 O275 83.9 (11) . . ?  
O302 Dy8 O303 76.6 (10) . . ?  
O272 Dy8 O303 136.3 (11) . . ?  
O278 Dy8 O303 77.6 (11) . . ?  
O305 Dy8 O303 72.4 (12) . . ?  
O275 Dy8 O303 143.5 (10) . . ?  
O302 Dy8 O304 148.4 (11) . . ?  
O272 Dy8 O304 76.3 (12) . . ?  
O278 Dy8 O304 132.6 (12) . . ?  
O305 Dy8 O304 67.5 (13) . . ?  
O275 Dy8 O304 71.8 (11) . . ?  
O303 Dy8 O304 120.6 (11) . . ?  
O302 Dy8 O306 85.9 (11) . . ?  
O272 Dy8 O306 75.7 (11) . . ?  
O278 Dy8 O306 145.7 (11) . . ?  
O305 Dy8 O306 102.0 (12) . . ?  
O275 Dy8 O306 143.0 (10) . . ?  
O303 Dy8 O306 70.7 (10) . . ?  
O304 Dy8 O306 76.8 (11) . . ?  
O302 Dy8 Cs3 133.8 (8) . . ?  
O272 Dy8 Cs3 105.7 (9) . . ?  
O278 Dy8 Cs3 130.6 (8) . . ?  
O305 Dy8 Cs3 53.5 (11) . . ?  
O275 Dy8 Cs3 113.7 (7) . . ?  
O303 Dy8 Cs3 73.6 (8) . . ?

O304 Dy8 Cs3 47.4(8) . . ?  
O306 Dy8 Cs3 51.2(7) . . ?  
O1 W1 O13 101.5(18) . . ?  
O1 W1 O12 101.9(17) . . ?  
O13 W1 O12 156.6(14) . . ?  
O1 W1 O10 97.4(17) . . ?  
O13 W1 O10 88.0(14) . . ?  
O12 W1 O10 89.1(12) . . ?  
O1 W1 O18 104.6(18) . . ?  
O13 W1 O18 87.5(14) . . ?  
O12 W1 O18 86.5(13) . . ?  
O10 W1 O18 158.0(14) . . ?  
O1 W1 O27 172.3(16) . . ?  
O13 W1 O27 73.8(13) . . ?  
O12 W1 O27 82.9(12) . . ?  
O10 W1 O27 88.6(12) . . ?  
O18 W1 O27 69.4(14) . . ?  
O1 W1 Cs6 77.3(14) . 2\_655 ?  
O13 W1 Cs6 51.3(11) . 2\_655 ?  
O12 W1 Cs6 135.4(8) . 2\_655 ?  
O10 W1 Cs6 135.5(9) . 2\_655 ?  
O18 W1 Cs6 52.1(10) . 2\_655 ?  
O27 W1 Cs6 95.1(8) . 2\_655 ?  
O2 W2 O14 101.5(17) . . ?  
O2 W2 O10 99.8(16) . . ?  
O14 W2 O10 88.1(14) . . ?  
O2 W2 O15 102.4(16) . . ?  
O14 W2 O15 96.3(16) . . ?  
O10 W2 O15 156.0(13) . . ?  
O2 W2 O11 99.5(16) . . ?  
O14 W2 O11 158.8(13) . . ?  
O10 W2 O11 85.4(12) . . ?  
O15 W2 O11 82.0(14) . . ?  
O2 W2 O26 173.4(16) . . ?  
O14 W2 O26 73.5(12) . . ?  
O10 W2 O26 84.6(11) . . ?  
O15 W2 O26 74.2(11) . . ?  
O11 W2 O26 85.8(11) . . ?  
O2 W2 K3 87.6(13) . . ?  
O14 W2 K3 137.1(12) . . ?  
O10 W2 K3 132.0(10) . . ?  
O15 W2 K3 41.0(11) . . ?  
O11 W2 K3 46.7(8) . . ?  
O26 W2 K3 93.2(7) . . ?  
O3 W3 O11 98.4(15) . . ?  
O3 W3 O16 104.5(15) . . ?  
O11 W3 O16 90.8(15) . . ?  
O3 W3 O12 99.9(14) . . ?  
O11 W3 O12 91.7(12) . . ?  
O16 W3 O12 154.8(13) . . ?  
O3 W3 O17 101.7(15) . . ?  
O11 W3 O17 159.6(13) . . ?  
O16 W3 O17 87.2(14) . . ?  
O12 W3 O17 81.8(12) . . ?  
O3 W3 O25 171.3(14) . . ?  
O11 W3 O25 89.9(12) . . ?  
O16 W3 O25 72.7(13) . . ?  
O12 W3 O25 82.3(11) . . ?  
O17 W3 O25 70.2(12) . . ?  
O3 W3 K3 88.1(12) . . ?  
O11 W3 K3 47.2(9) . . ?  
O16 W3 K3 49.2(11) . . ?  
O12 W3 K3 138.8(9) . . ?  
O17 W3 K3 136.2(9) . . ?



O25 W3 K3 95.7(8) . . ?  
O4 W4 O31 101.1(16) . . ?  
O4 W4 O23 97.4(16) . . ?  
O31 W4 O23 91.6(15) . . ?  
O4 W4 O22 103.3(15) . . ?  
O31 W4 O22 94.6(14) . . ?  
O23 W4 O22 156.9(14) . . ?  
O4 W4 O16 95.0(15) . . ?  
O31 W4 O16 163.9(14) . . ?  
O23 W4 O16 86.6(14) . . ?  
O22 W4 O16 81.3(14) . . ?  
O4 W4 O25 162.0(15) . . ?  
O31 W4 O25 93.9(13) . . ?  
O23 W4 O25 72.2(13) . . ?  
O22 W4 O25 85.1(12) . . ?  
O16 W4 O25 70.3(12) . . ?  
O4 W4 K3 83.7(11) . . ?  
O31 W4 K3 134.1(11) . . ?  
O23 W4 K3 133.4(11) . . ?  
O22 W4 K3 41.0(9) . . ?  
O16 W4 K3 47.2(10) . . ?  
O25 W4 K3 92.9(7) . . ?  
O5 W5 O30 102.2(16) . . ?  
O5 W5 O22 102.6(15) . . ?  
O30 W5 O22 92.9(14) . . ?  
O5 W5 O21 101.2(15) . . ?  
O30 W5 O21 92.8(13) . . ?  
O22 W5 O21 153.8(13) . . ?  
O5 W5 O15 94.0(15) . . ?  
O30 W5 O15 163.8(14) . . ?  
O22 W5 O15 83.1(13) . . ?  
O21 W5 O15 84.3(13) . . ?  
O5 W5 O26 163.6(14) . . ?  
O30 W5 O26 92.5(12) . . ?  
O22 W5 O26 83.6(11) . . ?  
O21 W5 O26 70.6(11) . . ?  
O15 W5 O26 71.5(11) . . ?  
O5 W5 K3 77.4(13) . . ?  
O30 W5 K3 136.9(11) . . ?  
O22 W5 K3 47.0(8) . . ?  
O21 W5 K3 130.0(9) . . ?  
O15 W5 K3 46.6(10) . . ?  
O26 W5 K3 96.8(7) . . ?  
O6 W6 O29 103.3(15) . . ?  
O6 W6 O21 99.5(14) . . ?  
O29 W6 O21 94.6(13) . . ?  
O6 W6 O20 100.9(15) . . ?  
O29 W6 O20 93.5(13) . . ?  
O21 W6 O20 155.6(13) . . ?  
O6 W6 O14 93.8(15) . . ?  
O29 W6 O14 162.9(15) . . ?  
O21 W6 O14 83.0(12) . . ?  
O20 W6 O14 82.5(13) . . ?  
O6 W6 O26 165.8(13) . . ?  
O29 W6 O26 90.4(13) . . ?  
O21 W6 O26 75.4(12) . . ?  
O20 W6 O26 81.6(12) . . ?  
O14 W6 O26 72.6(12) . . ?  
O7 W7 O28 105.1(16) . . ?  
O7 W7 O20 99.0(16) . . ?  
O28 W7 O20 92.5(15) . . ?  
O7 W7 O19 96.6(15) . . ?  
O28 W7 O19 94.8(15) . . ?  
O20 W7 O19 160.4(15) . . ?

O7 W7 O13 95.4(15) . . ?  
O28 W7 O13 159.5(14) . . ?  
O20 W7 O13 84.0(14) . . ?  
O19 W7 O13 82.8(14) . . ?  
O7 W7 O27 167.0(16) . . ?  
O28 W7 O27 86.1(14) . . ?  
O20 W7 O27 86.9(13) . . ?  
O19 W7 O27 75.5(13) . . ?  
O13 W7 O27 73.6(13) . . ?  
O7 W7 Cs6 71.8(13) . 2\_655 ?  
O28 W7 Cs6 136.0(11) . 2\_655 ?  
O20 W7 Cs6 131.5(11) . 2\_655 ?  
O19 W7 Cs6 44.3(10) . 2\_655 ?  
O13 W7 Cs6 51.2(10) . 2\_655 ?  
O27 W7 Cs6 95.6(9) . 2\_655 ?  
O8 W8 O33 100.6(16) . . ?  
O8 W8 O18 98.1(17) . . ?  
O33 W8 O18 160.7(15) . . ?  
O8 W8 O24 104.5(16) . . ?  
O33 W8 O24 85.6(14) . . ?  
O18 W8 O24 85.4(14) . . ?  
O8 W8 O19 99.2(16) . . ?  
O33 W8 O19 96.4(15) . . ?  
O18 W8 O19 84.9(15) . . ?  
O24 W8 O19 155.4(13) . . ?  
O8 W8 O27 168.7(15) . . ?  
O33 W8 O27 89.0(14) . . ?  
O18 W8 O27 72.9(14) . . ?  
O24 W8 O27 81.9(13) . . ?  
O19 W8 O27 73.6(13) . . ?  
O8 W8 Cs6 71.0(13) . 2\_655 ?  
O33 W8 Cs6 138.4(10) . 2\_655 ?  
O18 W8 Cs6 53.5(11) . 2\_655 ?  
O24 W8 Cs6 135.9(10) . 2\_655 ?  
O19 W8 Cs6 48.0(11) . 2\_655 ?  
O27 W8 Cs6 97.9(8) . 2\_655 ?  
O9 W9 O17 100.9(16) . . ?  
O9 W9 O24 100.8(16) . . ?  
O17 W9 O24 90.7(13) . . ?  
O9 W9 O23 99.1(16) . . ?  
O17 W9 O23 90.3(13) . . ?  
O24 W9 O23 159.4(15) . . ?  
O9 W9 O32 105.3(15) . . ?  
O17 W9 O32 153.7(13) . . ?  
O24 W9 O32 85.8(13) . . ?  
O23 W9 O32 84.2(13) . . ?  
O9 W9 O25 168.8(14) . . ?  
O17 W9 O25 73.8(13) . . ?  
O24 W9 O25 89.2(12) . . ?  
O23 W9 O25 71.4(13) . . ?  
O32 W9 O25 80.1(11) . . ?  
O35 W10 O34 100.5(14) . . ?  
O35 W10 O32 95.7(13) . . ?  
O34 W10 O32 99.0(12) . . ?  
O35 W10 O40 99.6(12) . . ?  
O34 W10 O40 96.8(13) . . ?  
O32 W10 O40 155.6(14) . . ?  
O35 W10 O33 170.3(15) . . ?  
O34 W10 O33 89.0(14) . . ?  
O32 W10 O33 81.1(13) . . ?  
O40 W10 O33 80.8(13) . . ?  
O35 W10 O39 85.7(13) . . ?  
O34 W10 O39 171.1(11) . . ?  
O32 W10 O39 86.6(12) . . ?

O40 W10 O39 75.8(12) . . ?  
O33 W10 O39 85.0(13) . . ?  
O50 W11 O39 103.7(17) . . ?  
O50 W11 O42 99.2(17) . . ?  
O39 W11 O42 96.6(13) . . ?  
O50 W11 O41 104.5(17) . . ?  
O39 W11 O41 88.7(12) . . ?  
O42 W11 O41 153.8(12) . . ?  
O50 W11 O61 95.4(16) . . ?  
O39 W11 O61 159.6(13) . . ?  
O42 W11 O61 87.1(12) . . ?  
O41 W11 O61 79.7(12) . . ?  
O50 W11 O48 163.8(16) . . ?  
O39 W11 O48 91.4(12) . . ?  
O42 W11 O48 72.8(11) . . ?  
O41 W11 O48 81.4(11) . . ?  
O61 W11 O48 70.5(11) . . ?  
O59 W12 O40 103.4(14) . . ?  
O59 W12 O41 100.6(15) . . ?  
O40 W12 O41 85.8(13) . . ?  
O59 W12 O60 105.6(14) . . ?  
O40 W12 O60 150.9(13) . . ?  
O41 W12 O60 91.0(12) . . ?  
O59 W12 O46 99.7(15) . . ?  
O40 W12 O46 88.1(13) . . ?  
O41 W12 O46 159.6(12) . . ?  
O60 W12 O46 84.9(12) . . ?  
O59 W12 O47 171.9(14) . . ?  
O40 W12 O47 80.0(12) . . ?  
O41 W12 O47 86.9(12) . . ?  
O60 W12 O47 70.9(11) . . ?  
O46 W12 O47 72.8(12) . . ?  
O58 W13 O45 101.6(14) . . ?  
O58 W13 O57 104.9(13) . . ?  
O45 W13 O57 89.1(12) . . ?  
O58 W13 O65 99.2(13) . . ?  
O45 W13 O65 88.3(12) . . ?  
O57 W13 O65 155.7(12) . . ?  
O58 W13 O46 97.6(14) . . ?  
O45 W13 O46 160.7(13) . . ?  
O57 W13 O46 86.4(12) . . ?  
O65 W13 O46 88.1(11) . . ?  
O58 W13 O47 165.7(13) . . ?  
O45 W13 O47 90.8(12) . . ?  
O57 W13 O47 82.2(11) . . ?  
O65 W13 O47 73.8(10) . . ?  
O46 W13 O47 70.1(12) . . ?  
O58 W13 Cs1 48.6(10) . . ?  
O45 W13 Cs1 53.0(10) . . ?  
O57 W13 Cs1 99.9(9) . . ?  
O65 W13 Cs1 97.7(8) . . ?  
O46 W13 Cs1 146.2(9) . . ?  
O47 W13 Cs1 143.5(7) . . ?  
O56 W14 O55 103.9(15) . . ?  
O56 W14 O44 104.2(15) . . ?  
O55 W14 O44 92.8(12) . . ?  
O56 W14 O45 98.9(15) . . ?  
O55 W14 O45 90.7(12) . . ?  
O44 W14 O45 155.1(13) . . ?  
O56 W14 O64 89.3(14) . . ?  
O55 W14 O64 166.0(13) . . ?  
O44 W14 O64 88.3(11) . . ?  
O45 W14 O64 82.7(11) . . ?  
O56 W14 O49 163.7(13) . . ?

O55 W14 O49 92.0 (12) . . ?  
O44 W14 O49 71.3 (11) . . ?  
O45 W14 O49 84.0 (11) . . ?  
O64 W14 O49 75.1 (10) . . ?  
O56 W14 Cs1 48.6 (12) . . ?  
O55 W14 Cs1 90.6 (10) . . ?  
O44 W14 Cs1 152.5 (9) . . ?  
O45 W14 Cs1 52.0 (9) . . ?  
O64 W14 Cs1 94.9 (8) . . ?  
O49 W14 Cs1 135.9 (7) . . ?  
O54 W15 O53 102.3 (15) . . ?  
O54 W15 O43 98.7 (16) . . ?  
O53 W15 O43 89.6 (14) . . ?  
O54 W15 O44 102.6 (15) . . ?  
O53 W15 O44 95.6 (13) . . ?  
O43 W15 O44 156.4 (12) . . ?  
O54 W15 O63 96.5 (14) . . ?  
O53 W15 O63 161.3 (14) . . ?  
O43 W15 O63 87.0 (13) . . ?  
O44 W15 O63 80.7 (12) . . ?  
O54 W15 O49 167.3 (13) . . ?  
O53 W15 O49 89.6 (12) . . ?  
O43 W15 O49 85.7 (11) . . ?  
O44 W15 O49 71.4 (11) . . ?  
O63 W15 O49 71.8 (11) . . ?  
O51 W16 O52 103.1 (18) . . ?  
O51 W16 O43 100.6 (17) . . ?  
O52 W16 O43 90.9 (15) . . ?  
O51 W16 O42 97.2 (17) . . ?  
O52 W16 O42 94.9 (14) . . ?  
O43 W16 O42 159.5 (12) . . ?  
O51 W16 O62 96.0 (17) . . ?  
O52 W16 O62 161.0 (15) . . ?  
O43 W16 O62 85.4 (13) . . ?  
O42 W16 O62 82.7 (12) . . ?  
O51 W16 O48 166.6 (17) . . ?  
O52 W16 O48 88.7 (13) . . ?  
O43 W16 O48 85.5 (12) . . ?  
O42 W16 O48 75.1 (11) . . ?  
O62 W16 O48 72.5 (12) . . ?  
O71 W17 O62 103.1 (15) . . ?  
O71 W17 O67 102.9 (14) . . ?  
O62 W17 O67 89.3 (14) . . ?  
O71 W17 O61 98.6 (14) . . ?  
O62 W17 O61 95.6 (13) . . ?  
O67 W17 O61 156.2 (14) . . ?  
O71 W17 O68 98.2 (13) . . ?  
O62 W17 O68 158.6 (14) . . ?  
O67 W17 O68 83.8 (13) . . ?  
O61 W17 O68 83.2 (12) . . ?  
O71 W17 O48 171.4 (13) . . ?  
O62 W17 O48 73.9 (13) . . ?  
O67 W17 O48 85.2 (12) . . ?  
O61 W17 O48 73.9 (12) . . ?  
O68 W17 O48 85.3 (11) . . ?  
O70 W18 O66 100.8 (14) . . ?  
O70 W18 O68 98.7 (14) . . ?  
O66 W18 O68 92.3 (13) . . ?  
O70 W18 O60 97.1 (14) . . ?  
O66 W18 O60 160.9 (13) . . ?  
O68 W18 O60 91.3 (13) . . ?  
O70 W18 O65 100.7 (14) . . ?  
O66 W18 O65 89.8 (13) . . ?  
O68 W18 O65 159.7 (10) . . ?

O60 W18 O65 80.5(12) . . ?  
O70 W18 O47 166.3(13) . . ?  
O66 W18 O47 91.7(11) . . ?  
O68 W18 O47 86.2(11) . . ?  
O60 W18 O47 69.8(11) . . ?  
O65 W18 O47 73.6(10) . . ?  
O70 W18 Cs1 53.2(11) . 2 ?  
O66 W18 Cs1 48.7(9) . 2 ?  
O68 W18 Cs1 107.3(8) . 2 ?  
O60 W18 Cs1 146.3(8) . 2 ?  
O65 W18 Cs1 89.2(7) . 2 ?  
O47 W18 Cs1 137.5(8) . 2 ?  
O69 W19 O63 105.8(15) . . ?  
O69 W19 O64 100.0(14) . . ?  
O63 W19 O64 93.2(14) . . ?  
O69 W19 O67 98.6(15) . . ?  
O63 W19 O67 92.1(14) . . ?  
O64 W19 O67 158.4(12) . . ?  
O69 W19 O66 95.0(14) . . ?  
O63 W19 O66 159.1(12) . . ?  
O64 W19 O66 85.2(12) . . ?  
O67 W19 O66 82.5(13) . . ?  
O69 W19 O49 175.7(14) . . ?  
O63 W19 O49 73.6(12) . . ?  
O64 W19 O49 75.9(10) . . ?  
O67 W19 O49 85.7(11) . . ?  
O66 W19 O49 85.9(10) . . ?  
O69 W19 Cs1 49.0(11) . 2 ?  
O63 W19 Cs1 152.2(9) . 2 ?  
O64 W19 Cs1 82.0(7) . 2 ?  
O67 W19 Cs1 102.4(9) . 2 ?  
O66 W19 Cs1 48.2(7) . 2 ?  
O49 W19 Cs1 130.5(7) . 2 ?  
O72 W20 O73 100.5(13) . . ?  
O72 W20 O57 91.2(12) . . ?  
O73 W20 O57 106.5(13) . . ?  
O72 W20 O109 103.5(12) . . ?  
O73 W20 O109 91.6(12) . . ?  
O57 W20 O109 154.3(10) . . ?  
O72 W20 O110 92.3(13) . . ?  
O73 W20 O110 160.6(13) . . ?  
O57 W20 O110 87.6(12) . . ?  
O109 W20 O110 71.1(11) . . ?  
O72 W20 O55 170.1(12) . . ?  
O73 W20 O55 85.4(11) . . ?  
O57 W20 O55 79.5(11) . . ?  
O109 W20 O55 84.1(11) . . ?  
O110 W20 O55 84.1(11) . . ?  
O72 W20 Cs2 64.8(9) . . ?  
O73 W20 Cs2 73.8(9) . . ?  
O57 W20 Cs2 155.1(8) . . ?  
O109 W20 Cs2 47.3(7) . . ?  
O110 W20 Cs2 99.1(8) . . ?  
O55 W20 Cs2 124.8(8) . . ?  
O111 W21 O120 100.3(13) . . ?  
O111 W21 O109 97.8(12) . . ?  
O120 W21 O109 98.7(12) . . ?  
O111 W21 O80 104.7(14) . . ?  
O120 W21 O80 102.2(12) . . ?  
O109 W21 O80 145.7(13) . . ?  
O111 W21 O110 160.7(12) . . ?  
O120 W21 O110 97.2(11) . . ?  
O109 W21 O110 71.3(11) . . ?  
O80 W21 O110 79.3(13) . . ?

O111 W21 O157 85.8(12) . . ?  
O120 W21 O157 173.6(11) . . ?  
O109 W21 O157 82.2(11) . . ?  
O80 W21 O157 74.2(12) . . ?  
O110 W21 O157 77.1(11) . . ?  
O111 W21 Cs2 63.6(9) . . ?  
O120 W21 Cs2 133.0(8) . . ?  
O109 W21 Cs2 46.8(7) . . ?  
O80 W21 Cs2 124.2(9) . . ?  
O110 W21 Cs2 98.3(7) . . ?  
O157 W21 Cs2 51.5(8) . . ?  
O79 W22 O95 101.6(13) . . ?  
O79 W22 O78 100.1(13) . . ?  
O95 W22 O78 89.8(11) . . ?  
O79 W22 O80 102.4(14) . . ?  
O95 W22 O80 155.7(13) . . ?  
O78 W22 O80 82.7(12) . . ?  
O79 W22 O81 98.8(13) . . ?  
O95 W22 O81 89.7(11) . . ?  
O78 W22 O81 160.9(12) . . ?  
O80 W22 O81 90.0(12) . . ?  
O79 W22 O101 172.3(12) . . ?  
O95 W22 O101 73.0(11) . . ?  
O78 W22 O101 85.6(11) . . ?  
O80 W22 O101 83.4(12) . . ?  
O81 W22 O101 76.0(10) . . ?  
O79 W22 Cs6 81.5(10) . . ?  
O95 W22 Cs6 51.4(8) . . ?  
O78 W22 Cs6 47.9(8) . . ?  
O80 W22 Cs6 129.7(9) . . ?  
O81 W22 Cs6 139.5(8) . . ?  
O101 W22 Cs6 98.8(7) . . ?  
O79 W22 Cs1 35.3(10) . . ?  
O95 W22 Cs1 124.2(8) . . ?  
O78 W22 Cs1 122.3(9) . . ?  
O80 W22 Cs1 78.7(9) . . ?  
O81 W22 Cs1 73.0(8) . . ?  
O101 W22 Cs1 143.9(7) . . ?  
Cs6 W22 Cs1 116.78(14) . . ?  
O157 W23 O77 101.6(15) . . ?  
O157 W23 O78 85.7(13) . . ?  
O77 W23 O78 106.9(12) . . ?  
O157 W23 O93 97.8(13) . . ?  
O77 W23 O93 94.7(13) . . ?  
O78 W23 O93 157.0(13) . . ?  
O157 W23 O94 167.0(14) . . ?  
O77 W23 O94 90.7(13) . . ?  
O78 W23 O94 86.7(11) . . ?  
O93 W23 O94 85.3(11) . . ?  
O157 W23 O102 97.2(13) . . ?  
O77 W23 O102 159.5(11) . . ?  
O78 W23 O102 82.5(11) . . ?  
O93 W23 O102 74.5(11) . . ?  
O94 W23 O102 71.4(11) . . ?  
O157 W23 Cs2 48.1(10) . . ?  
O77 W23 Cs2 81.7(10) . . ?  
O78 W23 Cs2 133.4(8) . . ?  
O93 W23 Cs2 56.3(9) . . ?  
O94 W23 Cs2 139.7(7) . . ?  
O102 W23 Cs2 105.3(6) . . ?  
O157 W23 Cs6 128.8(10) . . ?  
O77 W23 Cs6 75.1(9) . . ?  
O78 W23 Cs6 49.5(8) . . ?  
O93 W23 Cs6 133.3(9) . . ?

O94 W23 Cs6 50.2(8) . . ?  
O102 W23 Cs6 99.4(7) . . ?  
Cs2 W23 Cs6 155.22(15) . . ?  
O92 W24 O91 103.6(13) . . ?  
O92 W24 O90 102.1(14) . . ?  
O91 W24 O90 94.7(12) . . ?  
O92 W24 O93 95.5(14) . . ?  
O91 W24 O93 94.1(12) . . ?  
O90 W24 O93 157.9(12) . . ?  
O92 W24 O99 96.3(13) . . ?  
O91 W24 O99 160.0(11) . . ?  
O90 W24 O99 82.7(13) . . ?  
O93 W24 O99 82.1(13) . . ?  
O92 W24 O102 164.0(12) . . ?  
O91 W24 O102 90.0(10) . . ?  
O90 W24 O102 84.9(11) . . ?  
O93 W24 O102 74.8(11) . . ?  
O99 W24 O102 70.1(10) . . ?  
O92 W24 Cs2 85.2(11) . . ?  
O91 W24 Cs2 51.4(9) . . ?  
O90 W24 Cs2 145.9(9) . . ?  
O93 W24 Cs2 48.3(9) . . ?  
O99 W24 Cs2 130.1(9) . . ?  
O102 W24 Cs2 97.1(7) . . ?  
O89 W25 O88 102.5(14) . . ?  
O89 W25 O90 104.1(12) . . ?  
O88 W25 O90 91.4(13) . . ?  
O89 W25 O87 94.3(13) . . ?  
O88 W25 O87 97.3(13) . . ?  
O90 W25 O87 157.4(12) . . ?  
O89 W25 O98 96.4(13) . . ?  
O88 W25 O98 161.0(13) . . ?  
O90 W25 O98 83.1(12) . . ?  
O87 W25 O98 82.0(12) . . ?  
O89 W25 O100 165.0(13) . . ?  
O88 W25 O100 89.4(12) . . ?  
O90 W25 O100 84.4(11) . . ?  
O87 W25 O100 74.9(11) . . ?  
O98 W25 O100 72.1(11) . . ?  
O86 W26 O85 103.4(15) . . ?  
O86 W26 O84 101.7(14) . . ?  
O85 W26 O84 87.1(12) . . ?  
O86 W26 O87 104.5(15) . . ?  
O85 W26 O87 97.1(12) . . ?  
O84 W26 O87 151.6(12) . . ?  
O86 W26 O97 90.9(16) . . ?  
O85 W26 O97 164.8(14) . . ?  
O84 W26 O97 84.9(13) . . ?  
O87 W26 O97 84.1(12) . . ?  
O86 W26 O100 162.8(14) . . ?  
O85 W26 O100 93.5(12) . . ?  
O84 W26 O100 82.0(10) . . ?  
O87 W26 O100 69.8(11) . . ?  
O97 W26 O100 72.6(12) . . ?  
O83 W27 O82 102.2(14) . . ?  
O83 W27 O84 100.5(15) . . ?  
O82 W27 O84 89.3(13) . . ?  
O83 W27 O96 102.0(14) . . ?  
O82 W27 O96 155.6(12) . . ?  
O84 W27 O96 89.4(13) . . ?  
O83 W27 O81 99.4(14) . . ?  
O82 W27 O81 84.9(13) . . ?  
O84 W27 O81 160.1(11) . . ?  
O96 W27 O81 88.1(13) . . ?

O83 W27 O101 170.9(13) . . ?  
O82 W27 O101 83.5(11) . . ?  
O84 W27 O101 86.5(11) . . ?  
O96 W27 O101 72.2(11) . . ?  
O81 W27 O101 73.9(10) . . ?  
O107 W28 O103 104.2(16) . . ?  
O107 W28 O104 105.0(15) . . ?  
O103 W28 O104 90.5(12) . . ?  
O107 W28 O96 94.8(14) . . ?  
O103 W28 O96 92.4(12) . . ?  
O104 W28 O96 158.7(13) . . ?  
O107 W28 O95 97.5(15) . . ?  
O103 W28 O95 157.7(11) . . ?  
O104 W28 O95 88.8(12) . . ?  
O96 W28 O95 80.6(12) . . ?  
O107 W28 O101 165.2(13) . . ?  
O103 W28 O101 85.3(11) . . ?  
O104 W28 O101 86.0(11) . . ?  
O96 W28 O101 73.2(11) . . ?  
O95 W28 O101 72.4(10) . . ?  
O107 W28 Cs6 83.0(13) . . ?  
O103 W28 Cs6 137.2(8) . . ?  
O104 W28 Cs6 47.7(9) . . ?  
O96 W28 Cs6 129.5(10) . . ?  
O95 W28 Cs6 50.1(8) . . ?  
O101 W28 Cs6 97.8(7) . . ?  
O108 W29 O99 104.3(14) . . ?  
O108 W29 O94 98.8(16) . . ?  
O99 W29 O94 91.7(13) . . ?  
O108 W29 O105 100.4(16) . . ?  
O99 W29 O105 91.5(13) . . ?  
O94 W29 O105 159.2(12) . . ?  
O108 W29 O104 100.3(13) . . ?  
O99 W29 O104 155.4(12) . . ?  
O94 W29 O104 84.8(12) . . ?  
O105 W29 O104 83.7(12) . . ?  
O108 W29 O102 171.7(15) . . ?  
O99 W29 O102 72.2(11) . . ?  
O94 W29 O102 74.1(11) . . ?  
O105 W29 O102 87.3(11) . . ?  
O104 W29 O102 83.5(10) . . ?  
O108 W29 Cs6 82.7(12) . . ?  
O99 W29 Cs6 135.4(11) . . ?  
O94 W29 Cs6 43.9(8) . . ?  
O105 W29 Cs6 131.2(8) . . ?  
O104 W29 Cs6 48.4(9) . . ?  
O102 W29 Cs6 94.5(7) . . ?  
O106 W30 O98 103.9(14) . . ?  
O106 W30 O105 100.0(14) . . ?  
O98 W30 O105 90.0(12) . . ?  
O106 W30 O97 99.6(15) . . ?  
O98 W30 O97 91.6(13) . . ?  
O105 W30 O97 159.2(13) . . ?  
O106 W30 O103 100.1(13) . . ?  
O98 W30 O103 155.4(12) . . ?  
O105 W30 O103 80.7(11) . . ?  
O97 W30 O103 89.4(12) . . ?  
O106 W30 O100 173.5(14) . . ?  
O98 W30 O100 72.6(11) . . ?  
O105 W30 O100 85.6(11) . . ?  
O97 W30 O100 75.2(12) . . ?  
O103 W30 O100 83.9(10) . . ?  
O117 W31 O114 98.9(13) . . ?  
O117 W31 O126 100.0(12) . . ?



O114 W31 O126 95.9(12) . . ?  
O117 W31 O82 94.9(13) . . ?  
O114 W31 O82 102.5(13) . . ?  
O126 W31 O82 154.2(13) . . ?  
O117 W31 O125 86.2(11) . . ?  
O114 W31 O125 172.8(13) . . ?  
O126 W31 O125 78.2(11) . . ?  
O82 W31 O125 81.9(11) . . ?  
O117 W31 O85 171.2(11) . . ?  
O114 W31 O85 89.1(12) . . ?  
O126 W31 O85 82.7(12) . . ?  
O82 W31 O85 79.7(12) . . ?  
O125 W31 O85 86.2(11) . . ?  
O135 W32 O125 102.5(14) . . ?  
O135 W32 O136 102.7(14) . . ?  
O125 W32 O136 97.3(13) . . ?  
O135 W32 O144 95.2(15) . . ?  
O125 W32 O144 160.9(14) . . ?  
O136 W32 O144 85.6(14) . . ?  
O135 W32 O119 104.0(14) . . ?  
O125 W32 O119 85.7(12) . . ?  
O136 W32 O119 151.8(13) . . ?  
O144 W32 O119 83.1(13) . . ?  
O135 W32 O143 164.3(12) . . ?  
O125 W32 O143 92.6(11) . . ?  
O136 W32 O143 71.0(12) . . ?  
O144 W32 O143 70.4(13) . . ?  
O119 W32 O143 80.9(11) . . ?  
O133 W33 O149 99.7(16) . . ?  
O133 W33 O126 104.2(14) . . ?  
O149 W33 O126 155.9(14) . . ?  
O133 W33 O119 102.8(14) . . ?  
O149 W33 O119 90.8(13) . . ?  
O126 W33 O119 87.3(12) . . ?  
O133 W33 O132 95.7(13) . . ?  
O149 W33 O132 87.8(13) . . ?  
O126 W33 O132 86.6(13) . . ?  
O119 W33 O132 161.4(13) . . ?  
O133 W33 O142 166.0(12) . . ?  
O149 W33 O142 74.7(13) . . ?  
O126 W33 O142 81.3(11) . . ?  
O119 W33 O142 90.3(11) . . ?  
O132 W33 O142 71.4(11) . . ?  
O131 W34 O148 102.9(16) . . ?  
O131 W34 O132 98.2(15) . . ?  
O148 W34 O132 89.4(14) . . ?  
O131 W34 O127 99.6(15) . . ?  
O148 W34 O127 157.0(12) . . ?  
O132 W34 O127 92.3(13) . . ?  
O131 W34 O130 99.8(15) . . ?  
O148 W34 O130 88.4(14) . . ?  
O132 W34 O130 161.9(13) . . ?  
O127 W34 O130 82.9(13) . . ?  
O131 W34 O142 171.3(15) . . ?  
O148 W34 O142 72.7(12) . . ?  
O132 W34 O142 74.5(11) . . ?  
O127 W34 O142 85.7(10) . . ?  
O130 W34 O142 87.7(11) . . ?  
O131 W34 Cs3 38.7(12) . . ?  
O148 W34 Cs3 138.6(9) . . ?  
O132 W34 Cs3 84.1(9) . . ?  
O127 W34 Cs3 64.4(7) . . ?  
O130 W34 Cs3 109.1(9) . . ?  
O142 W34 Cs3 142.5(7) . . ?

O129 W35 O128 101.8 (13) . . ?  
O129 W35 O147 96.5 (14) . . ?  
O128 W35 O147 161.7 (13) . . ?  
O129 W35 O140 101.4 (13) . . ?  
O128 W35 O140 93.0 (12) . . ?  
O147 W35 O140 83.3 (13) . . ?  
O129 W35 O130 101.7 (13) . . ?  
O128 W35 O130 87.8 (13) . . ?  
O147 W35 O130 88.5 (14) . . ?  
O140 W35 O130 156.3 (12) . . ?  
O129 W35 O141 166.0 (11) . . ?  
O128 W35 O141 91.0 (11) . . ?  
O147 W35 O141 70.8 (12) . . ?  
O140 W35 O141 71.9 (11) . . ?  
O130 W35 O141 84.4 (11) . . ?  
O129 W35 Cs5 50.2 (9) . . ?  
O128 W35 Cs5 115.6 (9) . . ?  
O147 W35 Cs5 76.5 (11) . . ?  
O140 W35 Cs5 53.9 (8) . . ?  
O130 W35 Cs5 144.9 (9) . . ?  
O141 W35 Cs5 118.8 (7) . . ?  
O139 W36 O123 105.4 (14) . . ?  
O139 W36 O146 99.0 (15) . . ?  
O123 W36 O146 155.4 (15) . . ?  
O139 W36 O140 99.5 (13) . . ?  
O123 W36 O140 96.4 (11) . . ?  
O146 W36 O140 82.5 (13) . . ?  
O139 W36 O138 101.8 (13) . . ?  
O123 W36 O138 92.1 (12) . . ?  
O146 W36 O138 79.7 (14) . . ?  
O140 W36 O138 154.0 (12) . . ?  
O139 W36 O141 166.3 (13) . . ?  
O123 W36 O141 87.2 (12) . . ?  
O146 W36 O141 68.8 (13) . . ?  
O140 W36 O141 73.4 (11) . . ?  
O138 W36 O141 82.6 (11) . . ?  
O137 W37 O124 103.0 (15) . . ?  
O137 W37 O138 103.2 (14) . . ?  
O124 W37 O138 94.6 (13) . . ?  
O137 W37 O145 95.6 (15) . . ?  
O124 W37 O145 161.4 (13) . . ?  
O138 W37 O145 82.8 (13) . . ?  
O137 W37 O136 98.4 (15) . . ?  
O124 W37 O136 94.8 (13) . . ?  
O138 W37 O136 153.9 (12) . . ?  
O145 W37 O136 80.6 (13) . . ?  
O137 W37 O143 165.2 (15) . . ?  
O124 W37 O143 89.8 (12) . . ?  
O138 W37 O143 83.0 (11) . . ?  
O145 W37 O143 71.6 (12) . . ?  
O136 W37 O143 72.7 (11) . . ?  
O155 W38 O145 105.8 (16) . . ?  
O155 W38 O144 101.3 (17) . . ?  
O145 W38 O144 89.3 (15) . . ?  
O155 W38 O151 102.6 (16) . . ?  
O145 W38 O151 91.7 (14) . . ?  
O144 W38 O151 154.8 (14) . . ?  
O155 W38 O150 96.6 (15) . . ?  
O145 W38 O150 157.6 (13) . . ?  
O144 W38 O150 86.5 (14) . . ?  
O151 W38 O150 83.1 (13) . . ?  
O155 W38 O143 173.5 (15) . . ?  
O145 W38 O143 71.5 (12) . . ?  
O144 W38 O143 73.0 (13) . . ?

O151 W38 O143 83.5 (12) . . ?  
O150 W38 O143 86.3 (11) . . ?  
O154 W39 O151 99.3 (16) . . ?  
O154 W39 O146 108.6 (17) . . ?  
O151 W39 O146 89.7 (15) . . ?  
O154 W39 O147 106.1 (16) . . ?  
O151 W39 O147 153.3 (14) . . ?  
O146 W39 O147 90.0 (15) . . ?  
O154 W39 O152 101.0 (17) . . ?  
O151 W39 O152 82.9 (14) . . ?  
O146 W39 O152 150.3 (14) . . ?  
O147 W39 O152 84.2 (14) . . ?  
O154 W39 O141 174.1 (16) . . ?  
O151 W39 O141 84.5 (12) . . ?  
O146 W39 O141 66.7 (12) . . ?  
O147 W39 O141 70.9 (12) . . ?  
O152 W39 O141 83.9 (12) . . ?  
O153 W40 O152 105.8 (15) . . ?  
O153 W40 O150 100.7 (14) . . ?  
O152 W40 O150 91.6 (13) . . ?  
O153 W40 O148 101.1 (14) . . ?  
O152 W40 O148 89.1 (13) . . ?  
O150 W40 O148 157.1 (13) . . ?  
O153 W40 O149 97.6 (15) . . ?  
O152 W40 O149 156.4 (15) . . ?  
O150 W40 O149 87.3 (12) . . ?  
O148 W40 O149 83.0 (13) . . ?  
O153 W40 O142 165.3 (12) . . ?  
O152 W40 O142 85.9 (12) . . ?  
O150 W40 O142 87.5 (11) . . ?  
O148 W40 O142 69.7 (11) . . ?  
O149 W40 O142 70.5 (12) . . ?  
O118 W41 O115 101.1 (12) . . ?  
O118 W41 O127 102.1 (12) . . ?  
O115 W41 O127 94.7 (12) . . ?  
O118 W41 O194 93.5 (13) . . ?  
O115 W41 O194 100.4 (12) . . ?  
O127 W41 O194 155.7 (11) . . ?  
O118 W41 O192 160.4 (12) . . ?  
O115 W41 O192 96.2 (11) . . ?  
O127 W41 O192 85.6 (11) . . ?  
O194 W41 O192 74.0 (11) . . ?  
O118 W41 O128 84.5 (11) . . ?  
O115 W41 O128 170.9 (12) . . ?  
O127 W41 O128 77.0 (11) . . ?  
O194 W41 O128 86.3 (11) . . ?  
O192 W41 O128 79.6 (10) . . ?  
O118 W41 Dy5 129.1 (10) . . ?  
O115 W41 Dy5 95.4 (9) . . ?  
O127 W41 Dy5 124.3 (8) . . ?  
O194 W41 Dy5 35.8 (8) . . ?  
O192 W41 Dy5 38.9 (8) . . ?  
O128 W41 Dy5 86.5 (7) . . ?  
O118 W41 Cs3 151.2 (10) . . ?  
O115 W41 Cs3 55.6 (9) . . ?  
O127 W41 Cs3 67.3 (7) . . ?  
O194 W41 Cs3 106.3 (7) . . ?  
O192 W41 Cs3 48.4 (7) . . ?  
O128 W41 Cs3 116.8 (7) . . ?  
Dy5 W41 Cs3 74.41 (7) . . ?  
O159 W42 O158 104.6 (14) . . ?  
O159 W42 O160 94.2 (15) . . ?  
O158 W42 O160 105.0 (13) . . ?  
O159 W42 O173 92.9 (15) . . ?

O158 W42 O173 92.0 (14) . . ?  
O160 W42 O173 159.3 (11) . . ?  
O159 W42 O178 167.3 (13) . . ?  
O158 W42 O178 88.0 (12) . . ?  
O160 W42 O178 83.4 (12) . . ?  
O173 W42 O178 85.4 (12) . . ?  
O159 W42 O176 92.4 (13) . . ?  
O158 W42 O176 157.4 (14) . . ?  
O160 W42 O176 88.3 (12) . . ?  
O173 W42 O176 72.0 (12) . . ?  
O178 W42 O176 75.1 (11) . . ?  
O161 W43 O113 102.8 (13) . . ?  
O161 W43 O162 98.6 (13) . . ?  
O113 W43 O162 97.7 (12) . . ?  
O161 W43 O160 93.0 (14) . . ?  
O113 W43 O160 102.2 (13) . . ?  
O162 W43 O160 154.2 (11) . . ?  
O161 W43 O179 160.9 (13) . . ?  
O113 W43 O179 96.2 (13) . . ?  
O162 W43 O179 80.9 (12) . . ?  
O160 W43 O179 80.6 (13) . . ?  
O161 W43 O175 88.3 (13) . . ?  
O113 W43 O175 166.5 (12) . . ?  
O162 W43 O175 72.7 (12) . . ?  
O160 W43 O175 84.7 (12) . . ?  
O179 W43 O175 73.2 (12) . . ?  
O161 W43 Cs2 125.7 (10) . . ?  
O113 W43 Cs2 51.8 (10) . . ?  
O162 W43 Cs2 128.3 (8) . . ?  
O160 W43 Cs2 57.5 (8) . . ?  
O179 W43 Cs2 65.5 (9) . . ?  
O175 W43 Cs2 126.8 (9) . . ?  
O161 W43 Cs3 57.3 (11) . . ?  
O113 W43 Cs3 81.6 (10) . . ?  
O162 W43 Cs3 49.6 (8) . . ?  
O160 W43 Cs3 149.8 (8) . . ?  
O179 W43 Cs3 129.1 (10) . . ?  
O175 W43 Cs3 98.4 (9) . . ?  
Cs2 W43 Cs3 133.43 (9) . . ?  
O164 W44 O163 104.0 (15) . . ?  
O164 W44 O180 91.9 (16) . . ?  
O163 W44 O180 164.0 (16) . . ?  
O164 W44 O165 100.4 (15) . . ?  
O163 W44 O165 89.8 (14) . . ?  
O180 W44 O165 86.5 (15) . . ?  
O164 W44 O162 102.9 (14) . . ?  
O163 W44 O162 92.3 (12) . . ?  
O180 W44 O162 84.8 (13) . . ?  
O165 W44 O162 155.3 (14) . . ?  
O164 W44 O175 164.9 (14) . . ?  
O163 W44 O175 90.2 (13) . . ?  
O180 W44 O175 74.0 (14) . . ?  
O165 W44 O175 84.4 (14) . . ?  
O162 W44 O175 71.0 (12) . . ?  
O164 W44 Cs3 84.0 (10) . . ?  
O163 W44 Cs3 47.6 (10) . . ?  
O180 W44 Cs3 137.2 (11) . . ?  
O165 W44 Cs3 136.2 (10) . . ?  
O162 W44 Cs3 55.2 (8) . . ?  
O175 W44 Cs3 102.5 (8) . . ?  
O167 W45 O181 100.3 (18) . . ?  
O167 W45 O165 103.9 (19) . . ?  
O181 W45 O165 85.3 (15) . . ?  
O167 W45 O168 99.4 (18) . . ?

O181 W45 O168 88.7(15) . . ?  
O165 W45 O168 156.6(15) . . ?  
O167 W45 O166 103.4(18) . . ?  
O181 W45 O166 156.0(15) . . ?  
O165 W45 O166 85.9(14) . . ?  
O168 W45 O166 90.6(14) . . ?  
O167 W45 O174 167.3(18) . . ?  
O181 W45 O174 70.1(14) . . ?  
O165 W45 O174 84.0(14) . . ?  
O168 W45 O174 72.7(14) . . ?  
O166 W45 O174 86.8(13) . . ?  
O373 W46 O182 102.7(18) . . ?  
O373 W46 O170 98.5(17) . . ?  
O182 W46 O170 90.6(17) . . ?  
O373 W46 O196 102.3(16) . . ?  
O182 W46 O196 154.8(18) . . ?  
O170 W46 O196 88.6(14) . . ?  
O373 W46 O168 98.3(16) . . ?  
O182 W46 O168 89.3(17) . . ?  
O170 W46 O168 162.8(14) . . ?  
O196 W46 O168 84.3(15) . . ?  
O373 W46 O174 168.1(15) . . ?  
O182 W46 O174 73.5(16) . . ?  
O170 W46 O174 92.8(13) . . ?  
O196 W46 O174 81.5(14) . . ?  
O168 W46 O174 70.7(13) . . ?  
O172 W47 O171 100(2) . . ?  
O172 W47 O177 96(2) . . ?  
O171 W47 O177 162.7(15) . . ?  
O172 W47 O173 105(2) . . ?  
O171 W47 O173 93.8(14) . . ?  
O177 W47 O173 89.1(13) . . ?  
O172 W47 O170 103(2) . . ?  
O171 W47 O170 85.9(14) . . ?  
O177 W47 O170 83.4(13) . . ?  
O173 W47 O170 151.4(14) . . ?  
O172 W47 O176 166.1(19) . . ?  
O171 W47 O176 92.4(14) . . ?  
O177 W47 O176 73.0(12) . . ?  
O173 W47 O176 67.3(12) . . ?  
O170 W47 O176 84.1(12) . . ?  
O188 W48 O178 102.0(15) . . ?  
O188 W48 O185 101.0(17) . . ?  
O178 W48 O185 156.2(15) . . ?  
O188 W48 O184 96.8(16) . . ?  
O178 W48 O184 86.6(12) . . ?  
O185 W48 O184 85.0(15) . . ?  
O188 W48 O177 105.0(17) . . ?  
O178 W48 O177 91.9(12) . . ?  
O185 W48 O177 87.8(15) . . ?  
O184 W48 O177 158.0(13) . . ?  
O188 W48 O176 173.0(15) . . ?  
O178 W48 O176 72.5(11) . . ?  
O185 W48 O176 84.9(13) . . ?  
O184 W48 O176 87.4(11) . . ?  
O177 W48 O176 71.3(12) . . ?  
O187 W49 O179 103.2(15) . . ?  
O187 W49 O184 100.7(15) . . ?  
O179 W49 O184 91.7(13) . . ?  
O187 W49 O180 100.6(16) . . ?  
O179 W49 O180 92.7(15) . . ?  
O184 W49 O180 156.6(14) . . ?  
O187 W49 O183 101.1(16) . . ?  
O179 W49 O183 155.6(15) . . ?

O184 W49 O183 85.0 (15) . . ?  
O180 W49 O183 81.6 (16) . . ?  
O187 W49 O175 170.3 (16) . . ?  
O179 W49 O175 72.7 (13) . . ?  
O184 W49 O175 88.4 (12) . . ?  
O180 W49 O175 71.1 (13) . . ?  
O183 W49 O175 83.0 (14) . . ?  
O186 W50 O183 101 (2) . . ?  
O186 W50 O185 104.6 (19) . . ?  
O183 W50 O185 89.7 (19) . . ?  
O186 W50 O181 101.9 (18) . . ?  
O183 W50 O181 90.1 (19) . . ?  
O185 W50 O181 152.9 (15) . . ?  
O186 W50 O182 104.2 (18) . . ?  
O183 W50 O182 154.2 (17) . . ?  
O185 W50 O182 86.1 (17) . . ?  
O181 W50 O182 82.4 (16) . . ?  
O186 W50 O174 167.4 (16) . . ?  
O183 W50 O174 86.2 (16) . . ?  
O185 W50 O174 85.2 (14) . . ?  
O181 W50 O174 67.8 (13) . . ?  
O182 W50 O174 68.1 (14) . . ?  
O193 W51 O195 101.5 (15) . . ?  
O193 W51 O197 96.6 (14) . . ?  
O195 W51 O197 104.4 (14) . . ?  
O193 W51 O196 99.6 (15) . . ?  
O195 W51 O196 93.6 (14) . . ?  
O197 W51 O196 152.8 (16) . . ?  
O193 W51 O198 169.9 (16) . . ?  
O195 W51 O198 88.5 (15) . . ?  
O197 W51 O198 82.0 (14) . . ?  
O196 W51 O198 78.2 (15) . . ?  
O193 W51 O171 82.9 (15) . . ?  
O195 W51 O171 173.1 (12) . . ?  
O197 W51 O171 80.2 (14) . . ?  
O196 W51 O171 80.3 (14) . . ?  
O198 W51 O171 87.0 (15) . . ?  
O199 W52 O220 88 (2) . . ?  
O199 W52 O200 106 (2) . . ?  
O220 W52 O200 87.8 (19) . . ?  
O199 W52 O198 104 (2) . . ?  
O220 W52 O198 166.6 (16) . . ?  
O200 W52 O198 94.1 (19) . . ?  
O199 W52 O134 101 (2) . . ?  
O220 W52 O134 84.5 (18) . . ?  
O200 W52 O134 151.5 (18) . . ?  
O198 W52 O134 87.6 (17) . . ?  
O199 W52 O215 164.1 (19) . . ?  
O220 W52 O215 77.4 (16) . . ?  
O200 W52 O215 68.0 (15) . . ?  
O198 W52 O215 91.1 (14) . . ?  
O134 W52 O215 83.5 (15) . . ?  
O213 W53 O212 97.9 (16) . . ?  
O213 W53 O219 104.2 (19) . . ?  
O212 W53 O219 87.9 (16) . . ?  
O213 W53 O197 102.6 (16) . . ?  
O212 W53 O197 91.3 (14) . . ?  
O219 W53 O197 153.1 (17) . . ?  
O213 W53 O134 97.2 (17) . . ?  
O212 W53 O134 164.8 (16) . . ?  
O219 W53 O134 89.8 (17) . . ?  
O197 W53 O134 84.0 (16) . . ?  
O213 W53 O214 172.0 (15) . . ?  
O212 W53 O214 74.1 (13) . . ?

O219 W53 O214 75.2(16) . . ?  
O197 W53 O214 78.7(13) . . ?  
O134 W53 O214 90.8(15) . . ?  
O210 W54 O211 103.8(15) . . ?  
O210 W54 O209 102.4(16) . . ?  
O211 W54 O209 95.1(17) . . ?  
O210 W54 O212 96.3(14) . . ?  
O211 W54 O212 92.0(14) . . ?  
O209 W54 O212 157.8(15) . . ?  
O210 W54 O218 92.0(15) . . ?  
O211 W54 O218 164.1(14) . . ?  
O209 W54 O218 82.5(16) . . ?  
O212 W54 O218 84.9(14) . . ?  
O210 W54 O214 160.6(16) . . ?  
O211 W54 O214 92.3(14) . . ?  
O209 W54 O214 86.5(15) . . ?  
O212 W54 O214 72.2(13) . . ?  
O218 W54 O214 71.9(13) . . ?  
O210 W54 K3 49.3(12) . 1\_455 ?  
O211 W54 K3 152.7(11) . 1\_455 ?  
O209 W54 K3 87.6(12) . 1\_455 ?  
O212 W54 K3 95.7(9) . 1\_455 ?  
O218 W54 K3 43.2(9) . 1\_455 ?  
O214 W54 K3 115.0(10) . 1\_455 ?  
O210 W54 Cs5 55.7(12) . . ?  
O211 W54 Cs5 72.5(11) . . ?  
O209 W54 Cs5 61.0(12) . . ?  
O212 W54 Cs5 141.1(9) . . ?  
O218 W54 Cs5 118.9(9) . . ?  
O214 W54 Cs5 141.6(10) . . ?  
K3 W54 Cs5 85.3(3) 1\_455 . . ?  
O207 W55 O208 102.8(17) . . ?  
O207 W55 O209 102.0(16) . . ?  
O208 W55 O209 91.8(15) . . ?  
O207 W55 O206 103.3(18) . . ?  
O208 W55 O206 90.2(16) . . ?  
O209 W55 O206 153.5(17) . . ?  
O207 W55 O217 95.6(16) . . ?  
O208 W55 O217 161.5(14) . . ?  
O209 W55 O217 86.5(15) . . ?  
O206 W55 O217 83.3(16) . . ?  
O207 W55 O216 163.8(17) . . ?  
O208 W55 O216 90.5(15) . . ?  
O209 W55 O216 86.6(15) . . ?  
O206 W55 O216 67.0(17) . . ?  
O217 W55 O216 71.0(14) . . ?  
O207 W55 Cs5 57.5(13) . . ?  
O208 W55 Cs5 70.5(10) . . ?  
O209 W55 Cs5 57.4(11) . . ?  
O206 W55 Cs5 146.5(14) . . ?  
O217 W55 Cs5 122.8(9) . . ?  
O216 W55 Cs5 137.3(11) . . ?  
O205 W56 O206 99(2) . . ?  
O205 W56 O204 102(2) . . ?  
O206 W56 O204 94(2) . . ?  
O205 W56 O203 93.3(18) . . ?  
O206 W56 O203 161.0(17) . . ?  
O204 W56 O203 98.0(12) . . ?  
O205 W56 O222 97(2) . . ?  
O206 W56 O222 88.2(19) . . ?  
O204 W56 O222 160.9(17) . . ?  
O203 W56 O222 75.6(11) . . ?  
O205 W56 O216 170(2) . . ?  
O206 W56 O216 77(2) . . ?

O204 W56 O216 87.9(16) . . ?  
O203 W56 O216 88.7(11) . . ?  
O222 W56 O216 74.2(16) . . ?  
O202 W57 O201 102(2) . . ?  
O202 W57 O200 101(2) . . ?  
O201 W57 O200 92.5(18) . . ?  
O202 W57 O221 98(2) . . ?  
O201 W57 O221 160.3(17) . . ?  
O200 W57 O221 84.9(19) . . ?  
O202 W57 O203 99(2) . . ?  
O201 W57 O203 94.7(12) . . ?  
O200 W57 O203 157.3(12) . . ?  
O221 W57 O203 81.2(13) . . ?  
O202 W57 O215 166(2) . . ?  
O201 W57 O215 88.0(15) . . ?  
O200 W57 O215 68.4(15) . . ?  
O221 W57 O215 72.8(16) . . ?  
O203 W57 O215 90.3(9) . . ?  
O227 W58 O224 99.7(19) . . ?  
O227 W58 O221 104(2) . . ?  
O224 W58 O221 156(2) . . ?  
O227 W58 O220 101.1(19) . . ?  
O224 W58 O220 89.1(16) . . ?  
O221 W58 O220 93.0(17) . . ?  
O227 W58 O223 97.3(14) . . ?  
O224 W58 O223 78.1(12) . . ?  
O221 W58 O223 92.2(14) . . ?  
O220 W58 O223 159.1(11) . . ?  
O227 W58 O215 169.9(16) . . ?  
O224 W58 O215 86.1(15) . . ?  
O221 W58 O215 71.8(17) . . ?  
O220 W58 O215 70.6(14) . . ?  
O223 W58 O215 91.9(8) . . ?  
O225 W59 O226 103.3(19) . . ?  
O225 W59 O218 89.5(17) . . ?  
O226 W59 O218 103.4(18) . . ?  
O225 W59 O224 85.0(17) . . ?  
O226 W59 O224 99.3(19) . . ?  
O218 W59 O224 157.3(16) . . ?  
O225 W59 O219 157.3(18) . . ?  
O226 W59 O219 99(2) . . ?  
O218 W59 O219 89.8(16) . . ?  
O224 W59 O219 87.0(16) . . ?  
O225 W59 O214 86.1(15) . . ?  
O226 W59 O214 169.8(17) . . ?  
O218 W59 O214 72.4(13) . . ?  
O224 W59 O214 85.3(14) . . ?  
O219 W59 O214 72.1(16) . . ?  
O223 W60 O228 91.6(17) . . ?  
O223 W60 O217 164.4(13) . . ?  
O228 W60 O217 99(2) . . ?  
O223 W60 O222 92.2(12) . . ?  
O228 W60 O222 102(2) . . ?  
O217 W60 O222 96.4(18) . . ?  
O223 W60 O225 80.6(11) . . ?  
O228 W60 O225 100(2) . . ?  
O217 W60 O225 86.5(17) . . ?  
O222 W60 O225 156.8(16) . . ?  
O223 W60 O216 93.6(10) . . ?  
O228 W60 O216 173(2) . . ?  
O217 W60 O216 76.5(15) . . ?  
O222 W60 O216 73.3(16) . . ?  
O225 W60 O216 85.1(15) . . ?  
O190 W61 O169 100.5(15) . . ?



O190 W61 O307 97.3 (14) . . ?  
O169 W61 O307 98.6 (14) . . ?  
O190 W61 O166 101.0 (16) . . ?  
O169 W61 O166 87.1 (14) . . ?  
O307 W61 O166 159.5 (13) . . ?  
O190 W61 O308 161.5 (14) . . ?  
O169 W61 O308 97.0 (13) . . ?  
O307 W61 O308 73.9 (11) . . ?  
O166 W61 O308 85.9 (13) . . ?  
O190 W61 O163 84.6 (14) . . ?  
O169 W61 O163 164.6 (13) . . ?  
O307 W61 O163 95.1 (12) . . ?  
O166 W61 O163 77.7 (13) . . ?  
O308 W61 O163 80.1 (11) . . ?  
O190 W61 W62 135.6 (12) . . ?  
O169 W61 W62 96.9 (11) . . ?  
O307 W61 W62 39.5 (8) . . ?  
O166 W61 W62 120.5 (10) . . ?  
O308 W61 W62 34.6 (8) . . ?  
O163 W61 W62 89.3 (9) . . ?  
O190 W61 Na16 148.4 (12) . 2\_546 ?  
O169 W61 Na16 50.8 (10) . 2\_546 ?  
O307 W61 Na16 99.7 (9) . 2\_546 ?  
O166 W61 Na16 68.7 (11) . 2\_546 ?  
O308 W61 Na16 50.1 (8) . 2\_546 ?  
O163 W61 Na16 119.9 (8) . 2\_546 ?  
W62 W61 Na16 69.1 (3) . 2\_546 ?  
O190 W61 Cs3 73.1 (12) . . ?  
O169 W61 Cs3 146.7 (10) . . ?  
O307 W61 Cs3 51.6 (8) . . ?  
O166 W61 Cs3 126.2 (10) . . ?  
O308 W61 Cs3 88.9 (8) . . ?  
O163 W61 Cs3 48.7 (8) . . ?  
W62 W61 Cs3 70.06 (8) . . ?  
Na16 W61 Cs3 137.6 (3) 2\_546 . ?  
O306 W62 O262 98.8 (14) . . ?  
O306 W62 O308 105.0 (14) . . ?  
O262 W62 O308 95.3 (14) . . ?  
O306 W62 O233 91.7 (14) . . ?  
O262 W62 O233 100.0 (14) . . ?  
O308 W62 O233 155.3 (13) . . ?  
O306 W62 O307 96.0 (12) . . ?  
O262 W62 O307 162.9 (13) . . ?  
O308 W62 O307 72.4 (11) . . ?  
O233 W62 O307 88.1 (12) . . ?  
O306 W62 O234 169.7 (13) . . ?  
O262 W62 O234 85.3 (14) . . ?  
O308 W62 O234 84.0 (13) . . ?  
O233 W62 O234 78.2 (14) . . ?  
O307 W62 O234 81.6 (12) . . ?  
O306 W62 W61 105.3 (11) . . ?  
O262 W62 W61 132.6 (11) . . ?  
O308 W62 W61 39.4 (8) . . ?  
O233 W62 W61 119.0 (10) . . ?  
O307 W62 W61 33.3 (7) . . ?  
O234 W62 W61 78.2 (10) . . ?  
O306 W62 Cs3 47.0 (10) . . ?  
O262 W62 Cs3 144.5 (11) . . ?  
O308 W62 Cs3 87.0 (9) . . ?  
O233 W62 Cs3 91.5 (10) . . ?  
O307 W62 Cs3 49.1 (7) . . ?  
O234 W62 Cs3 130.2 (9) . . ?  
W61 W62 Cs3 64.59 (7) . . ?  
O248 W63 O254 94.3 (16) . . ?

O248 W63 O309 99.8 (17) . . ?  
O254 W63 O309 86.0 (16) . . ?  
O248 W63 O247 100.3 (17) . . ?  
O254 W63 O247 89.6 (16) . . ?  
O309 W63 O247 159.7 (15) . . ?  
O248 W63 O233 102.9 (16) . . ?  
O254 W63 O233 162.7 (14) . . ?  
O309 W63 O233 89.2 (14) . . ?  
O247 W63 O233 89.2 (14) . . ?  
O248 W63 O363 165.2 (15) . . ?  
O254 W63 O363 72.1 (13) . . ?  
O309 W63 O363 85.5 (13) . . ?  
O247 W63 O363 74.3 (13) . . ?  
O233 W63 O363 90.9 (12) . . ?  
O248 W63 Cs4 50.3 (14) . . ?  
O254 W63 Cs4 79.9 (12) . . ?  
O309 W63 Cs4 51.1 (10) . . ?  
O247 W63 Cs4 147.1 (9) . . ?  
O233 W63 Cs4 109.7 (10) . . ?  
O363 W63 Cs4 129.7 (8) . . ?  
O231 W64 O234 103.1 (16) . . ?  
O231 W64 O235 95.7 (14) . . ?  
O234 W64 O235 93.1 (14) . . ?  
O231 W64 O309 104.5 (15) . . ?  
O234 W64 O309 90.6 (15) . . ?  
O235 W64 O309 158.1 (14) . . ?  
O231 W64 O249 94.1 (16) . . ?  
O234 W64 O249 162.8 (18) . . ?  
O235 W64 O249 86.1 (13) . . ?  
O309 W64 O249 84.1 (15) . . ?  
O231 W64 O361 161.7 (13) . . ?  
O234 W64 O361 91.9 (14) . . ?  
O235 W64 O361 72.9 (12) . . ?  
O309 W64 O361 85.5 (13) . . ?  
O249 W64 O361 71.4 (14) . . ?  
O231 W64 Cs4 55.8 (10) . . ?  
O234 W64 Cs4 107.1 (11) . . ?  
O235 W64 Cs4 147.6 (9) . . ?  
O309 W64 Cs4 49.3 (10) . . ?  
O249 W64 Cs4 81.7 (10) . . ?  
O361 W64 Cs4 129.6 (7) . . ?  
O237 W65 O236 106.9 (15) . . ?  
O237 W65 O238 100.0 (16) . . ?  
O236 W65 O238 94.5 (16) . . ?  
O237 W65 O235 94.0 (15) . . ?  
O236 W65 O235 93.8 (14) . . ?  
O238 W65 O235 160.8 (14) . . ?  
O237 W65 O250 93.3 (14) . . ?  
O236 W65 O250 159.6 (14) . . ?  
O238 W65 O250 84.3 (14) . . ?  
O235 W65 O250 81.8 (12) . . ?  
O237 W65 O361 161.0 (14) . . ?  
O236 W65 O361 88.7 (13) . . ?  
O238 W65 O361 89.3 (14) . . ?  
O235 W65 O361 73.7 (12) . . ?  
O250 W65 O361 70.9 (12) . . ?  
O240 W66 O239 105.7 (18) . . ?  
O240 W66 O241 98.8 (18) . . ?  
O239 W66 O241 94.9 (18) . . ?  
O240 W66 O238 98.1 (18) . . ?  
O239 W66 O238 91.8 (17) . . ?  
O241 W66 O238 159.3 (14) . . ?  
O240 W66 O251 92.6 (17) . . ?  
O239 W66 O251 161.6 (16) . . ?

O241 W66 O251 83.3 (16) . . ?  
O238 W66 O251 84.2 (16) . . ?  
O240 W66 O362 161.9 (18) . . ?  
O239 W66 O362 90.4 (15) . . ?  
O241 W66 O362 71.1 (15) . . ?  
O238 W66 O362 89.4 (14) . . ?  
O251 W66 O362 71.7 (14) . . ?  
O243 W67 O242 100 (2) . . ?  
O243 W67 O241 105 (2) . . ?  
O242 W67 O241 95.3 (16) . . ?  
O243 W67 O252 99 (2) . . ?  
O242 W67 O252 159.6 (18) . . ?  
O241 W67 O252 84.7 (17) . . ?  
O243 W67 O244 104 (2) . . ?  
O242 W67 O244 84.6 (16) . . ?  
O241 W67 O244 150.3 (19) . . ?  
O252 W67 O244 85.5 (18) . . ?  
O243 W67 O362 166 (2) . . ?  
O242 W67 O362 92.8 (14) . . ?  
O241 W67 O362 68.0 (15) . . ?  
O252 W67 O362 68.2 (17) . . ?  
O244 W67 O362 82.3 (16) . . ?  
O246 W68 O253 100.2 (19) . . ?  
O246 W68 O244 100 (2) . . ?  
O253 W68 O244 87.4 (19) . . ?  
O246 W68 O245 104.2 (17) . . ?  
O253 W68 O245 155.4 (18) . . ?  
O244 W68 O245 85.8 (16) . . ?  
O246 W68 O247 98.7 (17) . . ?  
O253 W68 O247 90.2 (17) . . ?  
O244 W68 O247 161.6 (18) . . ?  
O245 W68 O247 88.8 (15) . . ?  
O246 W68 O363 168.0 (15) . . ?  
O253 W68 O363 72.4 (16) . . ?  
O244 W68 O363 89.5 (16) . . ?  
O245 W68 O363 84.0 (13) . . ?  
O247 W68 O363 72.4 (13) . . ?  
O260 W69 O255 102.2 (19) . . ?  
O260 W69 O257 99.7 (19) . . ?  
O255 W69 O257 89.8 (16) . . ?  
O260 W69 O253 99 (2) . . ?  
O255 W69 O253 158.6 (16) . . ?  
O257 W69 O253 85.5 (17) . . ?  
O260 W69 O254 101.9 (18) . . ?  
O255 W69 O254 92.1 (16) . . ?  
O257 W69 O254 157.4 (15) . . ?  
O253 W69 O254 84.5 (17) . . ?  
O260 W69 O363 168.7 (17) . . ?  
O255 W69 O363 87.1 (14) . . ?  
O257 W69 O363 86.6 (13) . . ?  
O253 W69 O363 71.8 (15) . . ?  
O254 W69 O363 71.0 (12) . . ?  
O258 W70 O251 103 (2) . . ?  
O258 W70 O252 104 (2) . . ?  
O251 W70 O252 89.0 (18) . . ?  
O258 W70 O256 98 (2) . . ?  
O251 W70 O256 91.6 (18) . . ?  
O252 W70 O256 156.8 (19) . . ?  
O258 W70 O257 98.8 (19) . . ?  
O251 W70 O257 158.0 (17) . . ?  
O252 W70 O257 88.4 (17) . . ?  
O256 W70 O257 82.5 (16) . . ?  
O258 W70 O362 172.6 (19) . . ?  
O251 W70 O362 71.9 (15) . . ?

O252 W70 O362 70.7 (17) . . ?  
O256 W70 O362 87.5 (15) . . ?  
O257 W70 O362 86.7 (13) . . ?  
O259 W71 O250 107 (2) . . ?  
O259 W71 O249 97 (2) . . ?  
O250 W71 O249 93.2 (16) . . ?  
O259 W71 O256 102 (3) . . ?  
O250 W71 O256 93.5 (16) . . ?  
O249 W71 O256 157.3 (18) . . ?  
O259 W71 O255 95 (2) . . ?  
O250 W71 O255 158.0 (14) . . ?  
O249 W71 O255 86.3 (16) . . ?  
O256 W71 O255 79.5 (16) . . ?  
O259 W71 O361 171 (2) . . ?  
O250 W71 O361 73.6 (13) . . ?  
O249 W71 O361 74.1 (14) . . ?  
O256 W71 O361 87.1 (14) . . ?  
O255 W71 O361 85.2 (12) . . ?  
O261 W72 O302 101.4 (16) . . ?  
O261 W72 O245 104.2 (16) . . ?  
O302 W72 O245 95.3 (15) . . ?  
O261 W72 O284 88.2 (15) . . ?  
O302 W72 O284 98.2 (14) . . ?  
O245 W72 O284 159.5 (16) . . ?  
O261 W72 O281 169.0 (14) . . ?  
O302 W72 O281 86.2 (14) . . ?  
O245 W72 O281 82.7 (15) . . ?  
O284 W72 O281 82.8 (13) . . ?  
O261 W72 O242 87.9 (15) . . ?  
O302 W72 O242 169.2 (13) . . ?  
O245 W72 O242 77.0 (14) . . ?  
O284 W72 O242 87.3 (13) . . ?  
O281 W72 O242 85.3 (13) . . ?  
O282 W73 O281 102.4 (17) . . ?  
O282 W73 O291 94.7 (19) . . ?  
O281 W73 O291 162.7 (14) . . ?  
O282 W73 O283 105.8 (17) . . ?  
O281 W73 O283 88.8 (14) . . ?  
O291 W73 O283 84.1 (15) . . ?  
O282 W73 O280 101.2 (17) . . ?  
O281 W73 O280 90.4 (15) . . ?  
O291 W73 O280 88.7 (15) . . ?  
O283 W73 O280 152.5 (15) . . ?  
O282 W73 O289 165.3 (17) . . ?  
O281 W73 O289 91.1 (12) . . ?  
O291 W73 O289 72.2 (13) . . ?  
O283 W73 O289 79.9 (13) . . ?  
O280 W73 O289 72.6 (13) . . ?  
O279 W74 O278 103.6 (18) . . ?  
O279 W74 O277 101.6 (17) . . ?  
O278 W74 O277 92.6 (16) . . ?  
O279 W74 O280 97.0 (17) . . ?  
O278 W74 O280 92.0 (17) . . ?  
O277 W74 O280 159.1 (14) . . ?  
O279 W74 O290 97.1 (17) . . ?  
O278 W74 O290 159.2 (14) . . ?  
O277 W74 O290 80.9 (15) . . ?  
O280 W74 O290 87.6 (16) . . ?  
O279 W74 O289 167.4 (17) . . ?  
O278 W74 O289 87.1 (13) . . ?  
O277 W74 O289 84.2 (12) . . ?  
O280 W74 O289 75.8 (13) . . ?  
O290 W74 O289 72.7 (12) . . ?  
O276 W75 O275 104.4 (15) . . ?

O276 W75 O274 96.2 (16) . . ?  
O275 W75 O274 94.6 (15) . . ?  
O276 W75 O277 103.6 (15) . . ?  
O275 W75 O277 92.5 (14) . . ?  
O274 W75 O277 156.6 (15) . . ?  
O276 W75 O294 96.0 (14) . . ?  
O275 W75 O294 159.6 (12) . . ?  
O274 W75 O294 82.6 (14) . . ?  
O277 W75 O294 83.0 (13) . . ?  
O276 W75 O288 164.3 (13) . . ?  
O275 W75 O288 89.1 (12) . . ?  
O274 W75 O288 74.2 (14) . . ?  
O277 W75 O288 83.6 (13) . . ?  
O294 W75 O288 70.7 (11) . . ?  
O273 W76 O271 107.3 (19) . . ?  
O273 W76 O270 104.8 (17) . . ?  
O271 W76 O270 91.2 (14) . . ?  
O273 W76 O274 103.6 (18) . . ?  
O271 W76 O274 92.7 (15) . . ?  
O270 W76 O274 148.7 (15) . . ?  
O273 W76 O295 91.5 (18) . . ?  
O271 W76 O295 161.1 (14) . . ?  
O270 W76 O295 81.6 (13) . . ?  
O274 W76 O295 84.7 (14) . . ?  
O273 W76 O288 159.9 (17) . . ?  
O271 W76 O288 92.1 (13) . . ?  
O270 W76 O288 79.5 (12) . . ?  
O274 W76 O288 69.3 (13) . . ?  
O295 W76 O288 69.5 (11) . . ?  
O269 W77 O268 102 (2) . . ?  
O269 W77 O270 103.6 (18) . . ?  
O268 W77 O270 93.8 (15) . . ?  
O269 W77 O286 100 (2) . . ?  
O268 W77 O286 85.6 (18) . . ?  
O270 W77 O286 156.0 (17) . . ?  
O269 W77 O293 101.7 (18) . . ?  
O268 W77 O293 155.7 (15) . . ?  
O270 W77 O293 83.3 (15) . . ?  
O286 W77 O293 87.5 (18) . . ?  
O269 W77 O287 167.0 (19) . . ?  
O268 W77 O287 85.3 (14) . . ?  
O270 W77 O287 86.0 (13) . . ?  
O286 W77 O287 70.1 (16) . . ?  
O293 W77 O287 70.4 (13) . . ?  
O285 W78 O292 102 (2) . . ?  
O285 W78 O283 103 (2) . . ?  
O292 W78 O283 86.2 (15) . . ?  
O285 W78 O286 97 (2) . . ?  
O292 W78 O286 90.6 (17) . . ?  
O283 W78 O286 159.8 (18) . . ?  
O285 W78 O284 105.1 (19) . . ?  
O292 W78 O284 152.5 (14) . . ?  
O283 W78 O284 87.3 (15) . . ?  
O286 W78 O284 86.4 (17) . . ?  
O285 W78 O287 167.5 (17) . . ?  
O292 W78 O287 72.2 (14) . . ?  
O283 W78 O287 87.8 (14) . . ?  
O286 W78 O287 72.2 (16) . . ?  
O284 W78 O287 80.9 (13) . . ?  
O299 W79 O298 102.5 (18) . . ?  
O299 W79 O293 100.0 (17) . . ?  
O298 W79 O293 156.9 (16) . . ?  
O299 W79 O297 102.0 (18) . . ?  
O298 W79 O297 89.8 (15) . . ?

O293 W79 O297 90.0 (16) . . ?  
O299 W79 O292 101.3 (17) . . ?  
O298 W79 O292 84.5 (14) . . ?  
O293 W79 O292 86.6 (15) . . ?  
O297 W79 O292 156.6 (15) . . ?  
O299 W79 O287 167.6 (16) . . ?  
O298 W79 O287 83.7 (14) . . ?  
O293 W79 O287 73.3 (14) . . ?  
O297 W79 O287 88.6 (14) . . ?  
O292 W79 O287 68.3 (13) . . ?  
O301 W80 O290 102.6 (17) . . ?  
O301 W80 O291 103.8 (17) . . ?  
O290 W80 O291 92.1 (15) . . ?  
O301 W80 O296 97.8 (16) . . ?  
O290 W80 O296 88.9 (14) . . ?  
O291 W80 O296 157.6 (15) . . ?  
O301 W80 O298 102.1 (15) . . ?  
O290 W80 O298 154.8 (16) . . ?  
O291 W80 O298 86.4 (13) . . ?  
O296 W80 O298 83.3 (12) . . ?  
O301 W80 O289 174.7 (14) . . ?  
O290 W80 O289 74.0 (14) . . ?  
O291 W80 O289 72.5 (14) . . ?  
O296 W80 O289 86.3 (12) . . ?  
O298 W80 O289 81.6 (12) . . ?  
O300 W81 O294 103.3 (13) . . ?  
O300 W81 O295 102.5 (14) . . ?  
O294 W81 O295 93.6 (13) . . ?  
O300 W81 O296 98.8 (14) . . ?  
O294 W81 O296 90.0 (13) . . ?  
O295 W81 O296 157.0 (14) . . ?  
O300 W81 O297 100.0 (14) . . ?  
O294 W81 O297 156.3 (14) . . ?  
O295 W81 O297 85.4 (14) . . ?  
O296 W81 O297 82.4 (14) . . ?  
O300 W81 O288 174.2 (14) . . ?  
O294 W81 O288 72.5 (12) . . ?  
O295 W81 O288 74.0 (12) . . ?  
O296 W81 O288 85.4 (12) . . ?  
O297 W81 O288 84.5 (13) . . ?  
O265 W82 O272 112.1 (15) . . ?  
O265 W82 O266 93 (2) . . ?  
O272 W82 O266 91 (2) . . ?  
O265 W82 O268 94.2 (16) . . ?  
O272 W82 O268 113.1 (16) . . ?  
O266 W82 O268 150 (2) . . ?  
O265 W82 O271 169.0 (14) . . ?  
O272 W82 O271 78.5 (14) . . ?  
O266 W82 O271 84 (2) . . ?  
O268 W82 O271 83.7 (14) . . ?  
O265 W82 O267 82 (2) . . ?  
O272 W82 O267 159 (2) . . ?  
O266 W82 O267 72 (3) . . ?  
O268 W82 O267 80 (2) . . ?  
O271 W82 O267 87 (2) . . ?  
W60 O223 W58 148.69 (14) . . ?  
W56 O203 W57 134.09 (13) . . ?

\_diffn\_measured\_fraction\_theta\_max 0.998  
\_diffn\_refl\_theta\_full 24.41  
\_diffn\_measured\_fraction\_theta\_full 0.998  
\_refine\_diff\_density\_max 4.302  
\_refine\_diff\_density\_min -3.953  
\_refine\_diff\_density\_rms 0.469

data\_fh51

```
_audit_creation_method          SHELXL-97
_chemical_name_systematic
;
?
;
_chemical_name_common           ?
_chemical_melting_point         ?
_chemical_formula_moiety        ?
_chemical_formula_sum
'As16 Cs11.60 Ho16 K8 Na28 O780 W163.20'
_chemical_formula_weight        48820.20

loop_
  _atom_type_symbol
  _atom_type_description
  _atom_type_scatter_dispersion_real
  _atom_type_scatter_dispersion_imag
  _atom_type_scatter_source
'O' 'O' 0.0106 0.0060
'International Tables Vol C Tables 4.2.6.8 and 6.1.1.4'
'Na' 'Na' 0.0362 0.0249
'International Tables Vol C Tables 4.2.6.8 and 6.1.1.4'
'K' 'K' 0.2009 0.2494
'International Tables Vol C Tables 4.2.6.8 and 6.1.1.4'
'As' 'As' 0.0499 2.0058
'International Tables Vol C Tables 4.2.6.8 and 6.1.1.4'
'Cs' 'Cs' -0.3680 2.1192
'International Tables Vol C Tables 4.2.6.8 and 6.1.1.4'
'Ho' 'Ho' -0.2175 4.6783
'International Tables Vol C Tables 4.2.6.8 and 6.1.1.4'
'W' 'W' -0.8490 6.8722
'International Tables Vol C Tables 4.2.6.8 and 6.1.1.4'

_symmetry_space_group_name_H-M 'P -1'
_symmetry_cell_setting triclinic

loop_
  _symmetry_equiv_pos_as_xyz
  'x, y, z'
  '-x, -y, -z'

_cell_length_a 21.0952(3)
_cell_length_b 23.1674(4)
_cell_length_c 44.8997(8)
_cell_angle_alpha 81.2160(10)
_cell_angle_beta 83.2370(10)
_cell_angle_gamma 82.3230(10)
_cell_volume 21385.2(6)
_cell_formula_units_Z 1
_cell_measurement_temperature 183(2)
_cell_measurement_reflns_used 25833
_cell_measurement_theta_min 2.1692
_cell_measurement_theta_max 29.2617

_exptl_crystal_description block
_exptl_crystal_colour pink
_exptl_crystal_size_max 0.13
_exptl_crystal_size_mid 0.11
_exptl_crystal_size_min 0.03
_exptl_crystal_density_meas ?
_exptl_crystal_density_diffrn 3.791
```

```
_exptl_crystal_density_method      'not measured'
_exptl_crystal_F_000               21015
_exptl_absorpt_coefficient_mu      24.560
_exptl_absorpt_correction_type     'multi-scan'
_exptl_absorpt_correction_T_min    0.66346
_exptl_absorpt_correction_T_max    1.00000
_exptl_absorpt_process_details
;
CrysAlis RED, Oxford Diffraction Ltd.,
Version 1.171.32.24 (release 21-04-2008 CrysAlis171 .NET)
(compiled Apr 21 2008,18:23:10)
Empirical absorption correction using spherical harmonics,
implemented in SCALE3 ABSPACK scaling algorithm.
;

_exptl_special_details
;
?
;

_diffrn_ambient_temperature        183(2)
_diffrn_radiation_wavelength       0.71073
_diffrn_radiation_type             MoK\alpha
_diffrn_radiation_source           'fine-focus sealed tube'
_diffrn_radiation_monochromator     graphite
_diffrn_measurement_device_type     'Xcalibur Ruby'
_diffrn_measurement_method         '/o oscillation scan'
_diffrn_detector_area_resol_mean   10.4498
_diffrn_standards_number           ?
_diffrn_standards_interval_count   ?
_diffrn_standards_interval_time    ?
_diffrn_standards_decay_%          ?
_diffrn_reflns_number              331502
_diffrn_reflns_av_R_equivalents    0.2071
_diffrn_reflns_av_sigmaI/netI      0.3614
_diffrn_reflns_limit_h_min         -25
_diffrn_reflns_limit_h_max         23
_diffrn_reflns_limit_k_min         -27
_diffrn_reflns_limit_k_max         27
_diffrn_reflns_limit_l_min         -54
_diffrn_reflns_limit_l_max         54
_diffrn_reflns_theta_min           2.17
_diffrn_reflns_theta_max           25.35
_reflns_number_total               77658
_reflns_number_gt                   31368
_reflns_threshold_expression        >2sigma(I)

_computing_data_collection         'CrysAlis RED (Oxford, 2007)'
_computing_cell_refinement         'CrysAlis RED (Oxford, 2007)'
_computing_data_reduction         'CrysAlis RED (Oxford, 2007)'
_computing_structure_solution      'SHELXS-97 (Sheldrick, 1990)'
_computing_structure_refinement    'SHELXL-97 (Sheldrick, 1997)'
_computing_molecular_graphics     'ORTEP-3 (Farrugia, 1997)'
_computing_publication_material    'SHELXL-97 (Sheldrick, 2008)'

_refine_special_details
;
Refinement of F2 against ALL reflections. The weighted R-factor
wR and
goodness of fit S are based on F2, conventional R-factors R are
based
on F, with F set to zero for negative F2. The threshold expression
of
F2 > 2sigma(F2) is used only for calculating R-factors(gt) etc.
```



and is  
not relevant to the choice of reflections for refinement. R-factors based on  $F^2$  are statistically about twice as large as those based on F, and R-factors based on ALL data will be even larger.  
;

```
_refine_ls_structure_factor_coef  Fsqd
_refine_ls_matrix_type            full
_refine_ls_weighting_scheme       calc
_refine_ls_weighting_details
'calc w=1/[\s^2^(Fo^2^)+(0.0498P)^2^+0.0000P] where P=(Fo^2^+2Fc^2
^)/3'
_atom_sites_solution_primary      direct
_atom_sites_solution_secondary   difmap
_refine_ls_extinction_method      none
_refine_ls_extinction_coef       ?
_refine_ls_number_reflns         77658
_refine_ls_number_parameters      2598
_refine_ls_number_restraints     0
_refine_ls_R_factor_all          0.2455
_refine_ls_R_factor_gt           0.0983
_refine_ls_wR_factor_ref         0.1836
_refine_ls_wR_factor_gt         0.1414
_refine_ls_goodness_of_fit_ref   0.941
_refine_ls_restrained_S_all     0.941
_refine_ls_shift/su_max          0.059
_refine_ls_shift/su_mean         0.000
```

```
loop_
  _atom_site_label
  _atom_site_type_symbol
  _atom_site_fract_x
  _atom_site_fract_y
  _atom_site_fract_z
  _atom_site_U_iso_or_equiv
  _atom_site_adp_type
  _atom_site_occupancy
  _atom_site_symmetry_multiplicity
  _atom_site_calc_flag
  _atom_site_refinement_flags
  _atom_site_disorder_assembly
  _atom_site_disorder_group
O1 O 0.6475(16) 0.1830(15) 0.0760(8) 0.047(10) Uiso 1 1 d . . .
O2 O 0.7272(14) 0.0161(13) 0.1466(7) 0.034(9) Uiso 1 1 d . . .
O3 O 0.5852(15) 0.1878(14) 0.1826(7) 0.037(9) Uiso 1 1 d . . .
O4 O 0.4112(15) 0.0377(14) 0.2411(8) 0.045(10) Uiso 1 1 d . . .
O5 O 0.5641(14) -0.1289(13) 0.2104(7) 0.033(8) Uiso 1 1 d . . .
O6 O 0.6248(13) -0.1348(13) 0.0881(6) 0.027(8) Uiso 1 1 d . . .
O7 O 0.5479(14) 0.0332(13) 0.0144(7) 0.032(8) Uiso 1 1 d . . .
O8 O 0.3978(16) 0.2299(15) 0.0499(8) 0.047(10) Uiso 1 1 d . . .
O9 O 0.3322(13) 0.2210(13) 0.1597(6) 0.027(8) Uiso 1 1 d . . .
O10 O 0.6342(14) 0.0755(13) 0.1078(7) 0.031(8) Uiso 1 1 d . . .
O11 O 0.6048(12) 0.0748(11) 0.1649(6) 0.013(7) Uiso 1 1 d . . .
O12 O 0.5593(13) 0.1656(12) 0.1263(6) 0.023(8) Uiso 1 1 d . . .
O13 O 0.5928(13) 0.1011(12) 0.0525(6) 0.023(8) Uiso 1 1 d . . .
O14 O 0.6582(13) -0.0403(12) 0.1146(6) 0.023(8) Uiso 1 1 d . . .
O15 O 0.6252(14) -0.0394(13) 0.1753(7) 0.032(8) Uiso 1 1 d . . .
O16 O 0.5009(14) 0.1055(13) 0.2036(7) 0.034(9) Uiso 1 1 d . . .
O17 O 0.4630(15) 0.1932(14) 0.1637(7) 0.038(9) Uiso 1 1 d . . .
O18 O 0.5237(15) 0.1930(14) 0.0708(7) 0.038(9) Uiso 1 1 d . . .
O19 O 0.4692(16) 0.1217(15) 0.0394(8) 0.050(10) Uiso 1 1 d . . .
O20 O 0.5783(14) -0.0112(13) 0.0724(7) 0.034(9) Uiso 1 1 d . . .
```

O21 O 0.5807(14) -0.1163(13) 0.1473(7) 0.032(8) Uiso 1 1 d . . . .  
O22 O 0.5065(14) -0.0117(13) 0.1988(7) 0.028(8) Uiso 1 1 d . . . .  
O23 O 0.3777(12) 0.1214(11) 0.1919(6) 0.014(7) Uiso 1 1 d . . . .  
O24 O 0.4202(14) 0.1874(13) 0.1109(7) 0.031(8) Uiso 1 1 d . . . .  
O25 O 0.4683(12) 0.0878(11) 0.1548(6) 0.014(7) Uiso 1 1 d . . . .  
O26 O 0.5414(12) -0.0069(12) 0.1351(6) 0.019(7) Uiso 1 1 d . . . .  
O27 O 0.5013(14) 0.0861(13) 0.0943(7) 0.029(8) Uiso 1 1 d . . . .  
O28 O 0.4548(14) 0.0064(13) 0.0629(7) 0.029(8) Uiso 1 1 d . . . .  
O29 O 0.4963(12) -0.0893(11) 0.1027(6) 0.017(7) Uiso 1 1 d . . . .  
O30 O 0.4633(16) -0.0927(15) 0.1744(8) 0.046(10) Uiso 1 1 d . . . .  
O31 O 0.3800(13) 0.0047(12) 0.1903(6) 0.027(8) Uiso 1 1 d . . . .  
O32 O 0.3393(13) 0.1089(12) 0.1390(6) 0.020(7) Uiso 1 1 d . . . .  
O33 O 0.3637(13) 0.1294(12) 0.0798(6) 0.026(8) Uiso 1 1 d . . . .  
O34 O 0.3409(13) 0.0171(12) 0.1046(6) 0.022(8) Uiso 1 1 d . . . .  
O35 O 0.2341(13) 0.0618(12) 0.1371(6) 0.025(8) Uiso 1 1 d . . . .  
O36 O 0.3362(13) -0.0300(12) 0.0452(6) 0.025(8) Uiso 1 1 d . . . .  
O37 O 0.3729(12) -0.0890(12) 0.1408(6) 0.017(7) Uiso 1 1 d . . . .  
O38 O 0.4505(14) -0.0995(13) 0.0422(7) 0.029(8) Uiso 1 1 d . . . .  
O39 O 0.2436(14) 0.1701(13) 0.1084(7) 0.035(9) Uiso 1 1 d . . . .  
O40 O 0.2570(13) 0.0917(12) 0.0730(6) 0.023(8) Uiso 1 1 d . . . .  
O41 O 0.2087(12) 0.1986(12) 0.0553(6) 0.017(7) Uiso 1 1 d . . . .  
O42 O 0.1349(16) 0.2383(15) 0.1305(8) 0.048(10) Uiso 1 1 d . . . .  
O43 O 0.0007(13) 0.1339(12) 0.1439(6) 0.023(8) Uiso 1 1 d . . . .  
O44 O -0.0256(13) -0.0120(12) 0.1239(6) 0.021(7) Uiso 1 1 d . . . .  
O45 O 0.0801(11) -0.0076(10) 0.0507(5) 0.006(6) Uiso 1 1 d . . . .  
O46 O 0.2370(12) 0.0545(12) 0.0237(6) 0.017(7) Uiso 1 1 d . . . .  
O47 O 0.1367(13) 0.0987(12) 0.0531(6) 0.020(7) Uiso 1 1 d . . . .  
O48 O 0.1020(14) 0.1651(13) 0.0981(7) 0.036(9) Uiso 1 1 d . . . .  
O49 O 0.0411(13) 0.0694(12) 0.0955(6) 0.019(7) Uiso 1 1 d . . . .  
O50 O 0.2233(15) 0.2867(14) 0.0904(7) 0.038(9) Uiso 1 1 d . . . .  
O51 O 0.0376(15) 0.2200(14) 0.1761(7) 0.046(10) Uiso 1 1 d . . . .  
O52 O 0.1195(13) 0.1244(12) 0.1607(6) 0.023(8) Uiso 1 1 d . . . .  
O53 O 0.0604(13) 0.0281(12) 0.1577(6) 0.026(8) Uiso 1 1 d . . . .  
O54 O -0.0710(13) 0.0486(12) 0.1743(6) 0.025(8) Uiso 1 1 d . . . .  
O55 O 0.0953(12) -0.0580(11) 0.1063(6) 0.016(7) Uiso 1 1 d . . . .  
O56 O -0.0040(14) -0.0852(13) 0.0781(7) 0.030(8) Uiso 1 1 d . . . .  
O57 O 0.1917(12) -0.0182(11) 0.0720(6) 0.011(7) Uiso 1 1 d . . . .  
O58 O 0.1859(13) -0.0446(12) 0.0126(6) 0.025(8) Uiso 1 1 d . . . .  
O59 O 0.3032(16) 0.1537(15) 0.0159(8) 0.051(10) Uiso 1 1 d . . . .  
O60 O 0.1727(13) 0.1620(12) 0.0068(6) 0.026(8) Uiso 1 1 d . . . .  
O61 O 0.1120(14) 0.2741(13) 0.0719(7) 0.030(8) Uiso 1 1 d . . . .  
O62 O 0.0168(15) 0.2461(14) 0.1151(7) 0.038(9) Uiso 1 1 d . . . .  
O63 O -0.0810(14) 0.0963(14) 0.1120(7) 0.037(9) Uiso 1 1 d . . . .  
O64 O -0.0429(13) 0.0289(12) 0.0650(6) 0.026(8) Uiso 1 1 d . . . .  
O65 O 0.1181(12) 0.0674(11) 0.0044(6) 0.015(7) Uiso 1 1 d . . . .  
O66 O 0.0120(13) 0.1180(12) 0.0332(6) 0.022(7) Uiso 1 1 d . . . .  
O67 O -0.0253(14) 0.1835(13) 0.0745(7) 0.030(8) Uiso 1 1 d . . . .  
O68 O 0.0699(12) 0.2129(11) 0.0354(6) 0.017(7) Uiso 1 1 d . . . .  
O69 O -0.1231(14) 0.1324(13) 0.0540(7) 0.031(8) Uiso 1 1 d . . . .  
O70 O 0.0604(11) 0.1780(11) -0.0193(5) 0.008(6) Uiso 1 1 d . . . .  
O71 O -0.0148(17) 0.3044(16) 0.0596(8) 0.056(11) Uiso 1 1 d . . . .  
O72 O 0.2814(13) -0.0834(12) 0.1035(6) 0.021(7) Uiso 1 1 d . . . .  
O73 O 0.1827(12) -0.0338(11) 0.1388(6) 0.015(7) Uiso 1 1 d . . . .  
O74 O 0.1074(13) 0.0584(12) 0.2165(6) 0.023(8) Uiso 1 1 d . . . .  
O75 O 0.2327(15) 0.0891(14) 0.1938(7) 0.045(10) Uiso 1 1 d . . . .  
O76 O 0.2590(15) -0.0300(14) 0.1918(7) 0.041(9) Uiso 1 1 d . . . .  
O77 O 0.3878(12) -0.1672(12) 0.0897(6) 0.018(7) Uiso 1 1 d . . . .  
O78 O 0.3188(12) -0.2368(12) 0.0584(6) 0.018(7) Uiso 1 1 d . . . .  
O79 O 0.2197(14) -0.1907(13) 0.0228(7) 0.032(8) Uiso 1 1 d . . . .  
O80 O 0.2004(11) -0.2558(11) 0.0803(5) 0.008(6) Uiso 1 1 d . . . .  
O81 O 0.1871(12) -0.3033(11) 0.0321(6) 0.016(7) Uiso 1 1 d . . . .  
O82 O 0.1531(12) -0.3740(11) 0.0822(6) 0.011(7) Uiso 1 1 d . . . .  
O83 O 0.1366(14) -0.4046(13) 0.0233(7) 0.032(8) Uiso 1 1 d . . . .  
O84 O 0.2261(12) -0.4655(11) 0.0606(6) 0.013(7) Uiso 1 1 d . . . .

O85 O 0.1669 (11) -0.4748 (10) 0.1175 (5) 0.006 (6) Uiso 1 1 d . . . .  
O86 O 0.2098 (13) -0.5781 (12) 0.0956 (6) 0.025 (8) Uiso 1 1 d . . . .  
O87 O 0.2759 (14) -0.5382 (13) 0.1374 (7) 0.035 (9) Uiso 1 1 d . . . .  
O88 O 0.2657 (15) -0.4392 (14) 0.1688 (7) 0.039 (9) Uiso 1 1 d . . . .  
O89 O 0.3549 (14) -0.5360 (13) 0.1835 (7) 0.031 (8) Uiso 1 1 d . . . .  
O90 O 0.3859 (11) -0.4261 (10) 0.1505 (5) 0.006 (6) Uiso 1 1 d . . . .  
O91 O 0.3112 (12) -0.3344 (11) 0.1658 (6) 0.011 (7) Uiso 1 1 d . . . .  
O92 O 0.4343 (11) -0.3473 (11) 0.1800 (6) 0.010 (6) Uiso 1 1 d . . . .  
O93 O 0.3946 (13) -0.2614 (12) 0.1327 (6) 0.021 (7) Uiso 1 1 d . . . .  
O94 O 0.4394 (11) -0.2676 (10) 0.0738 (5) 0.003 (6) Uiso 1 1 d . . . .  
O95 O 0.3118 (13) -0.2902 (12) 0.0118 (6) 0.024 (8) Uiso 1 1 d . . . .  
O96 O 0.2673 (13) -0.3914 (12) 0.0130 (6) 0.025 (8) Uiso 1 1 d . . . .  
O97 O 0.3253 (12) -0.5371 (11) 0.0795 (6) 0.015 (7) Uiso 1 1 d . . . .  
O98 O 0.4001 (12) -0.5186 (11) 0.1207 (6) 0.013 (7) Uiso 1 1 d . . . .  
O99 O 0.4705 (11) -0.3571 (10) 0.1177 (5) 0.007 (6) Uiso 1 1 d . . . .  
O100 O 0.3082 (12) -0.4421 (11) 0.1062 (6) 0.014 (7) Uiso 1 1 d . . . .  
O101 O 0.2772 (11) -0.3531 (11) 0.0608 (5) 0.008 (6) Uiso 1 1 d . . . .  
O102 O 0.3532 (11) -0.3335 (11) 0.1032 (6) 0.009 (6) Uiso 1 1 d . . . .  
O103 O 0.3674 (12) -0.4454 (12) 0.0414 (6) 0.018 (7) Uiso 1 1 d . . . .  
O104 O 0.4099 (13) -0.3475 (12) 0.0410 (6) 0.020 (7) Uiso 1 1 d . . . .  
O105 O 0.4406 (12) -0.4348 (11) 0.0822 (6) 0.014 (7) Uiso 1 1 d . . . .  
O106 O 0.4593 (12) -0.5446 (12) 0.0634 (6) 0.018 (7) Uiso 1 1 d . . . .  
O107 O 0.3924 (13) -0.3813 (12) -0.0140 (6) 0.021 (7) Uiso 1 1 d . . . .  
O108 O 0.5359 (13) -0.3594 (12) 0.0621 (6) 0.020 (7) Uiso 1 1 d . . . .  
O109 O 0.1762 (12) -0.1467 (11) 0.1339 (6) 0.012 (7) Uiso 1 1 d . . . .  
O110 O 0.1873 (12) -0.1398 (11) 0.0793 (6) 0.011 (7) Uiso 1 1 d . . . .  
O111 O 0.1826 (11) -0.2695 (10) 0.1466 (5) 0.006 (6) Uiso 1 1 d . . . .  
O112 O 0.2522 (12) -0.3990 (11) 0.2261 (6) 0.014 (7) Uiso 1 1 d . . . .  
O113 O 0.2144 (12) -0.2779 (12) 0.2137 (6) 0.017 (7) Uiso 1 1 d . . . .  
O114 O 0.1519 (13) -0.3782 (12) 0.1452 (6) 0.022 (8) Uiso 1 1 d . . . .  
O115 O 0.1021 (12) -0.3247 (11) 0.2027 (6) 0.012 (7) Uiso 1 1 d . . . .  
O116 O -0.0371 (12) -0.1576 (11) 0.1391 (6) 0.013 (7) Uiso 1 1 d . . . .  
O117 O 0.0469 (12) -0.3317 (11) 0.1165 (6) 0.011 (7) Uiso 1 1 d . . . .  
O118 O 0.0114 (12) -0.2792 (11) 0.1631 (6) 0.013 (7) Uiso 1 1 d . . . .  
O119 O -0.0038 (12) -0.5157 (11) 0.1252 (6) 0.011 (7) Uiso 1 1 d . . . .  
O120 O 0.0901 (11) -0.2082 (11) 0.1119 (5) 0.009 (6) Uiso 1 1 d . . . .  
O121 O 0.0526 (12) -0.2483 (11) 0.0630 (6) 0.012 (7) Uiso 1 1 d . . . .  
O122 O -0.0735 (12) -0.1771 (11) 0.0799 (6) 0.015 (7) Uiso 1 1 d . . . .  
O123 O -0.1130 (12) -0.2491 (12) 0.1364 (6) 0.017 (7) Uiso 1 1 d . . . .  
O124 O -0.0619 (12) -0.3023 (11) 0.0885 (6) 0.015 (7) Uiso 1 1 d . . . .  
O125 O 0.0485 (12) -0.4313 (11) 0.0924 (6) 0.016 (7) Uiso 1 1 d . . . .  
O126 O 0.0579 (11) -0.4471 (10) 0.1490 (5) 0.000 (6) Uiso 1 1 d . . . .  
O127 O 0.0016 (12) -0.3827 (11) 0.2052 (6) 0.013 (7) Uiso 1 1 d . . . .  
O128 O -0.0862 (12) -0.2924 (11) 0.2063 (6) 0.015 (7) Uiso 1 1 d . . . .  
O129 O -0.1865 (12) -0.2973 (11) 0.2484 (6) 0.015 (7) Uiso 1 1 d . . . .  
O130 O -0.1158 (13) -0.3947 (12) 0.2270 (6) 0.027 (8) Uiso 1 1 d . . . .  
O131 O -0.0171 (12) -0.4625 (12) 0.2585 (6) 0.017 (7) Uiso 1 1 d . . . .  
O132 O 0.0268 (13) -0.4996 (12) 0.2045 (6) 0.024 (8) Uiso 1 1 d . . . .  
O133 O 0.0868 (13) -0.5722 (12) 0.1634 (6) 0.020 (7) Uiso 1 1 d . . . .  
O134 O -0.1571 (14) 0.0138 (13) 0.3403 (7) 0.031 (8) Uiso 1 1 d . . . .  
O135 O 0.0196 (14) -0.5111 (14) 0.0611 (7) 0.037 (9) Uiso 1 1 d . . . .  
O136 O -0.0564 (11) -0.4026 (11) 0.0621 (6) 0.009 (6) Uiso 1 1 d . . . .  
O137 O -0.1444 (13) -0.3051 (12) 0.0472 (6) 0.022 (7) Uiso 1 1 d . . . .  
O138 O -0.1842 (12) -0.3083 (11) 0.1092 (6) 0.015 (7) Uiso 1 1 d . . . .  
O139 O -0.2417 (13) -0.2040 (12) 0.1306 (6) 0.022 (7) Uiso 1 1 d . . . .  
O140 O -0.2042 (11) -0.2604 (10) 0.1869 (5) 0.004 (6) Uiso 1 1 d . . . .  
O141 O -0.1519 (12) -0.3581 (11) 0.1694 (6) 0.012 (7) Uiso 1 1 d . . . .  
O142 O -0.0661 (12) -0.4542 (11) 0.1749 (6) 0.010 (7) Uiso 1 1 d . . . .  
O143 O -0.0925 (12) -0.4118 (12) 0.1175 (6) 0.018 (7) Uiso 1 1 d . . . .  
O144 O -0.0989 (15) -0.5025 (14) 0.0909 (7) 0.038 (9) Uiso 1 1 d . . . .  
O145 O -0.1828 (13) -0.4050 (12) 0.0824 (6) 0.025 (8) Uiso 1 1 d . . . .  
O146 O -0.2643 (13) -0.3209 (12) 0.1569 (6) 0.025 (8) Uiso 1 1 d . . . .  
O147 O -0.2371 (12) -0.3626 (12) 0.2132 (6) 0.019 (7) Uiso 1 1 d . . . .  
O148 O -0.0916 (12) -0.5116 (12) 0.2259 (6) 0.018 (7) Uiso 1 1 d . . . .

O149 O -0.0419 (14) -0.5648 (13) 0.1803 (7) 0.036 (9) Uiso 1 1 d . . . .  
O150 O -0.1415 (13) -0.5201 (13) 0.1486 (6) 0.027 (8) Uiso 1 1 d . . . .  
O151 O -0.2286 (13) -0.4286 (12) 0.1428 (6) 0.027 (8) Uiso 1 1 d . . . .  
O152 O -0.1980 (13) -0.4659 (12) 0.1961 (6) 0.025 (8) Uiso 1 1 d . . . .  
O153 O -0.1633 (13) -0.5866 (13) 0.2052 (7) 0.028 (8) Uiso 1 1 d . . . .  
O154 O -0.3271 (16) -0.4118 (15) 0.1883 (8) 0.047 (10) Uiso 1 1 d . . . .  
O155 O -0.2255 (15) -0.5138 (14) 0.1035 (7) 0.037 (9) Uiso 1 1 d . . . .  
O156 O 0.1464 (12) -0.4386 (11) 0.2028 (6) 0.011 (6) Uiso 1 1 d . . . .  
O157 O 0.2832 (11) -0.2205 (11) 0.1140 (6) 0.009 (6) Uiso 1 1 d . . . .  
O158 O 0.1323 (12) -0.0575 (11) 0.2050 (6) 0.016 (7) Uiso 1 1 d . . . .  
O159 O 0.0632 (11) -0.1365 (11) 0.2466 (5) 0.007 (6) Uiso 1 1 d . . . .  
O160 O 0.1876 (14) -0.1689 (13) 0.2365 (7) 0.030 (8) Uiso 1 1 d . . . .  
O161 O 0.1115 (12) -0.2505 (11) 0.2568 (6) 0.013 (7) Uiso 1 1 d . . . .  
O162 O 0.2139 (12) -0.3279 (12) 0.2734 (6) 0.017 (7) Uiso 1 1 d . . . .  
O163 O 0.1237 (12) -0.3372 (11) 0.3206 (6) 0.017 (7) Uiso 1 1 d . . . .  
O164 O 0.2375 (13) -0.4040 (12) 0.3295 (6) 0.021 (7) Uiso 1 1 d . . . .  
O165 O 0.1967 (15) -0.3008 (14) 0.3564 (7) 0.038 (9) Uiso 1 1 d . . . .  
O166 O 0.0728 (11) -0.2734 (10) 0.3631 (5) 0.005 (6) Uiso 1 1 d . . . .  
O167 O 0.1368 (15) -0.3113 (14) 0.4155 (7) 0.042 (9) Uiso 1 1 d . . . .  
O168 O 0.0873 (15) -0.1960 (14) 0.3986 (7) 0.039 (9) Uiso 1 1 d . . . .  
O169 O -0.0404 (11) -0.3094 (11) 0.3674 (6) 0.010 (6) Uiso 1 1 d . . . .  
O170 O 0.0901 (15) -0.0569 (14) 0.3428 (7) 0.038 (9) Uiso 1 1 d . . . .  
O171 O 0.0022 (14) -0.0584 (13) 0.3103 (7) 0.029 (8) Uiso 1 1 d . . . .  
O172 O 0.0453 (15) 0.0487 (14) 0.3052 (7) 0.041 (9) Uiso 1 1 d . . . .  
O173 O 0.0827 (11) -0.0282 (11) 0.2597 (6) 0.009 (6) Uiso 1 1 d . . . .  
O174 O 0.1498 (13) -0.1795 (12) 0.3467 (6) 0.024 (8) Uiso 1 1 d . . . .  
O175 O 0.1941 (13) -0.2312 (12) 0.2960 (6) 0.026 (8) Uiso 1 1 d . . . .  
O176 O 0.1383 (12) -0.1144 (11) 0.2908 (6) 0.011 (7) Uiso 1 1 d . . . .  
O177 O 0.1634 (12) -0.0080 (12) 0.2976 (6) 0.018 (7) Uiso 1 1 d . . . .  
O178 O 0.2105 (13) -0.0620 (12) 0.2458 (6) 0.021 (7) Uiso 1 1 d . . . .  
O179 O 0.2855 (13) -0.2383 (13) 0.2542 (7) 0.028 (8) Uiso 1 1 d . . . .  
O180 O 0.2951 (13) -0.3006 (12) 0.3095 (6) 0.022 (7) Uiso 1 1 d . . . .  
O181 O 0.2165 (14) -0.2247 (13) 0.3894 (7) 0.034 (9) Uiso 1 1 d . . . .  
O182 O 0.1672 (14) -0.1132 (13) 0.3831 (7) 0.035 (9) Uiso 1 1 d . . . .  
O183 O 0.2845 (13) -0.2049 (12) 0.3348 (6) 0.025 (8) Uiso 1 1 d . . . .  
O184 O 0.2803 (14) -0.1405 (13) 0.2825 (7) 0.031 (8) Uiso 1 1 d . . . .  
O185 O 0.2360 (13) -0.0963 (12) 0.3305 (6) 0.023 (8) Uiso 1 1 d . . . .  
O186 O 0.3008 (15) -0.1431 (14) 0.3811 (7) 0.046 (10) Uiso 1 1 d . . . .  
O187 O 0.3872 (13) -0.2262 (12) 0.2874 (6) 0.024 (8) Uiso 1 1 d . . . .  
O188 O 0.2959 (17) -0.0225 (16) 0.2799 (8) 0.056 (11) Uiso 1 1 d . . . .  
O189 O -0.0751 (13) -0.1324 (12) 0.2422 (6) 0.025 (8) Uiso 1 1 d . . . .  
O190 O 0.0084 (11) -0.2784 (11) 0.3092 (5) 0.008 (6) Uiso 1 1 d . . . .  
O191 O -0.1095 (14) -0.2371 (13) 0.2762 (7) 0.031 (8) Uiso 1 1 d . . . .  
O192 O -0.0027 (12) -0.3105 (11) 0.2481 (6) 0.015 (7) Uiso 1 1 d . . . .  
O193 O -0.0227 (12) -0.1614 (11) 0.3007 (6) 0.016 (7) Uiso 1 1 d . . . .  
O194 O 0.0120 (12) -0.2224 (11) 0.2118 (6) 0.011 (7) Uiso 1 1 d . . . .  
O195 O -0.0949 (12) -0.1810 (11) 0.3528 (6) 0.011 (7) Uiso 1 1 d . . . .  
O196 O 0.0215 (13) -0.1400 (13) 0.3540 (7) 0.028 (8) Uiso 1 1 d . . . .  
O197 O -0.1187 (11) -0.0764 (11) 0.3124 (5) 0.008 (6) Uiso 1 1 d . . . .  
O198 O -0.0843 (13) -0.0735 (12) 0.3669 (6) 0.024 (8) Uiso 1 1 d . . . .  
O199 O -0.0920 (14) 0.0278 (14) 0.3896 (7) 0.035 (9) Uiso 1 1 d . . . .  
O200 O -0.1587 (16) -0.0611 (15) 0.4191 (8) 0.046 (10) Uiso 1 1 d . . . .  
O201 O -0.1654 (14) -0.1746 (13) 0.4103 (7) 0.036 (9) Uiso 1 1 d . . . .  
O202 O -0.2164 (17) -0.1350 (16) 0.4635 (8) 0.062 (12) Uiso 1 1 d . . . .  
O203 O -0.2933 (15) -0.1572 (14) 0.4202 (7) 0.038 (9) Uiso 1 1 d . . . .  
O204 O -0.2442 (13) -0.2406 (13) 0.3887 (7) 0.028 (8) Uiso 1 1 d . . . .  
O205 O -0.3538 (16) -0.2564 (15) 0.4261 (8) 0.049 (10) Uiso 1 1 d . . . .  
O206 O -0.3616 (16) -0.2305 (15) 0.3635 (8) 0.052 (10) Uiso 1 1 d . . . .  
O207 O -0.3868 (17) -0.2252 (16) 0.3035 (8) 0.055 (11) Uiso 1 1 d . . . .  
O208 O -0.2682 (14) -0.2279 (14) 0.3190 (7) 0.037 (9) Uiso 1 1 d . . . .  
O209 O -0.3222 (15) -0.1239 (14) 0.2928 (7) 0.041 (9) Uiso 1 1 d . . . .  
O210 O -0.2706 (14) -0.0821 (13) 0.2364 (7) 0.035 (9) Uiso 1 1 d . . . .  
O211 O -0.1982 (13) -0.1456 (12) 0.2785 (6) 0.025 (8) Uiso 1 1 d . . . .  
O212 O -0.1936 (13) -0.0309 (13) 0.2666 (6) 0.027 (8) Uiso 1 1 d . . . .

O213 O -0.1086 (15) 0.0398 (14) 0.2802 (7) 0.040 (9) Uiso 1 1 d . . . .  
O214 O -0.2486 (13) -0.0556 (12) 0.3189 (6) 0.022 (7) Uiso 1 1 d . . . .  
O215 O -0.2310 (15) -0.0711 (14) 0.3804 (7) 0.045 (10) Uiso 1 1 d . . . .  
O216 O -0.3115 (13) -0.1350 (12) 0.3572 (6) 0.023 (8) Uiso 1 1 d . . . .  
O217 O -0.4189 (13) -0.1287 (12) 0.3389 (6) 0.021 (7) Uiso 1 1 d . . . .  
O218 O -0.3213 (13) -0.0071 (12) 0.2767 (6) 0.025 (8) Uiso 1 1 d . . . .  
O219 O -0.2392 (14) 0.0521 (14) 0.2996 (7) 0.036 (9) Uiso 1 1 d . . . .  
O220 O -0.2228 (16) 0.0338 (15) 0.3928 (8) 0.048 (10) Uiso 1 1 d . . . .  
O221 O -0.2841 (16) -0.0443 (15) 0.4290 (8) 0.048 (10) Uiso 1 1 d . . . .  
O222 O -0.4039 (16) -0.1469 (15) 0.3981 (8) 0.055 (11) Uiso 1 1 d . . . .  
O223 O -0.3700 (14) -0.0397 (13) 0.3890 (7) 0.034 (9) Uiso 1 1 d . . . .  
O224 O -0.3054 (13) 0.0359 (12) 0.3529 (6) 0.023 (8) Uiso 1 1 d . . . .  
O225 O -0.3848 (14) -0.0243 (13) 0.3342 (7) 0.032 (8) Uiso 1 1 d . . . .  
O226 O -0.3762 (16) 0.0917 (15) 0.3046 (8) 0.049 (10) Uiso 1 1 d . . . .  
O227 O -0.3491 (17) 0.0635 (16) 0.4098 (8) 0.057 (11) Uiso 1 1 d . . . .  
O228 O -0.4926 (14) -0.0537 (14) 0.3757 (7) 0.038 (9) Uiso 1 1 d . . . .  
O229 O -0.1567 (14) -0.2707 (13) 0.3368 (7) 0.030 (8) Uiso 1 1 d . . . .  
O230 O -0.1515 (17) -0.2953 (16) 0.4393 (8) 0.060 (11) Uiso 1 1 d . . . .  
O231 O -0.1535 (14) -0.3569 (13) 0.3904 (7) 0.035 (9) Uiso 1 1 d . . . .  
O232 O -0.0401 (15) -0.2413 (14) 0.4095 (7) 0.040 (9) Uiso 1 1 d . . . .  
O233 O -0.0227 (13) -0.5110 (12) 0.3511 (6) 0.021 (7) Uiso 1 1 d . . . .  
O234 O -0.0482 (13) -0.4344 (12) 0.3907 (6) 0.026 (8) Uiso 1 1 d . . . .  
O235 O -0.1191 (12) -0.4222 (11) 0.4433 (6) 0.014 (7) Uiso 1 1 d . . . .  
O236 O -0.0158 (14) -0.5009 (13) 0.4564 (7) 0.032 (8) Uiso 1 1 d . . . .  
O237 O -0.1006 (12) -0.4561 (12) 0.5048 (6) 0.017 (7) Uiso 1 1 d . . . .  
O238 O -0.0970 (16) -0.5725 (15) 0.4919 (8) 0.050 (10) Uiso 1 1 d . . . .  
O239 O 0.0191 (12) -0.6191 (12) 0.4720 (6) 0.017 (7) Uiso 1 1 d . . . .  
O240 O -0.0373 (15) -0.6721 (14) 0.5270 (7) 0.039 (9) Uiso 1 1 d . . . .  
O241 O -0.0268 (13) -0.7259 (12) 0.4754 (6) 0.023 (8) Uiso 1 1 d . . . .  
O242 O 0.0366 (15) -0.7194 (14) 0.4199 (7) 0.037 (9) Uiso 1 1 d . . . .  
O243 O -0.0223 (15) -0.8190 (14) 0.4415 (7) 0.040 (9) Uiso 1 1 d . . . .  
O244 O -0.0734 (17) -0.7247 (16) 0.3986 (8) 0.057 (11) Uiso 1 1 d . . . .  
O245 O 0.0123 (13) -0.6535 (12) 0.3738 (6) 0.022 (7) Uiso 1 1 d . . . .  
O246 O -0.0446 (19) -0.7207 (18) 0.3376 (9) 0.075 (13) Uiso 1 1 d . . . .  
O247 O -0.0691 (14) -0.6016 (13) 0.3319 (7) 0.031 (8) Uiso 1 1 d . . . .  
O248 O -0.1170 (12) -0.4819 (12) 0.3088 (6) 0.018 (7) Uiso 1 1 d . . . .  
O249 O -0.2216 (13) -0.4451 (13) 0.4194 (7) 0.028 (8) Uiso 1 1 d . . . .  
O250 O -0.1971 (13) -0.4931 (12) 0.4759 (6) 0.025 (8) Uiso 1 1 d . . . .  
O251 O -0.1428 (12) -0.6745 (12) 0.4961 (6) 0.017 (7) Uiso 1 1 d . . . .  
O252 O -0.1314 (15) -0.7435 (14) 0.4525 (7) 0.039 (9) Uiso 1 1 d . . . .  
O253 O -0.1565 (15) -0.6692 (14) 0.3625 (7) 0.037 (9) Uiso 1 1 d . . . .  
O254 O -0.1884 (14) -0.5566 (13) 0.3489 (7) 0.033 (8) Uiso 1 1 d . . . .  
O255 O -0.2371 (16) -0.5528 (15) 0.4070 (8) 0.053 (10) Uiso 1 1 d . . . .  
O256 O -0.2193 (14) -0.5965 (13) 0.4594 (7) 0.029 (8) Uiso 1 1 d . . . .  
O257 O -0.2031 (15) -0.6647 (14) 0.4186 (7) 0.039 (9) Uiso 1 1 d . . . .  
O258 O -0.2490 (18) -0.7091 (17) 0.4773 (9) 0.069 (12) Uiso 1 1 d . . . .  
O259 O -0.3125 (15) -0.4992 (14) 0.4555 (7) 0.043 (9) Uiso 1 1 d . . . .  
O260 O -0.2826 (15) -0.6221 (14) 0.3743 (7) 0.044 (10) Uiso 1 1 d . . . .  
O261 O 0.0865 (13) -0.6210 (12) 0.4159 (6) 0.026 (8) Uiso 1 1 d . . . .  
O262 O 0.0649 (15) -0.5059 (14) 0.3974 (7) 0.044 (10) Uiso 1 1 d . . . .  
O263 O 0.1094 (12) -0.4513 (11) 0.4441 (6) 0.017 (7) Uiso 1 1 d . . . .  
O264 O 0.1581 (15) -0.6414 (14) 0.4651 (7) 0.038 (9) Uiso 1 1 d . . . .  
O265 O 0.1897 (12) -0.5463 (12) 0.4230 (6) 0.019 (7) Uiso 1 1 d . . . .  
O266 O 0.280 (3) -0.481 (3) 0.3849 (13) 0.027 (16) Uiso 0.50 1 d P . . .  
O267 O 0.337 (3) -0.539 (3) 0.4222 (17) 0.06 (2) Uiso 0.50 1 d P . . .  
O268 O 0.2753 (14) -0.6414 (13) 0.4114 (7) 0.031 (8) Uiso 1 1 d . . . .  
O269 O 0.3568 (15) -0.6848 (14) 0.4564 (7) 0.041 (9) Uiso 1 1 d . . . .  
O270 O 0.3939 (14) -0.6833 (13) 0.3938 (7) 0.035 (9) Uiso 1 1 d . . . .  
O271 O 0.3430 (15) -0.5807 (14) 0.3639 (7) 0.042 (9) Uiso 1 1 d . . . .  
O272 O 0.2173 (15) -0.5518 (14) 0.3571 (7) 0.044 (10) Uiso 1 1 d . . . .  
O273 O 0.4737 (17) -0.5970 (16) 0.3629 (8) 0.056 (11) Uiso 1 1 d . . . .  
O274 O 0.4061 (11) -0.6104 (10) 0.3126 (5) 0.005 (6) Uiso 1 1 d . . . .  
O275 O 0.2816 (14) -0.6025 (13) 0.3014 (7) 0.034 (9) Uiso 1 1 d . . . .  
O276 O 0.3767 (15) -0.6148 (14) 0.2550 (7) 0.043 (9) Uiso 1 1 d . . . .

O277 O 0.3084 (14) -0.7039 (13) 0.2798 (7) 0.034 (9) Uiso 1 1 d . . . .  
O278 O 0.1845 (14) -0.6660 (13) 0.3019 (7) 0.028 (8) Uiso 1 1 d . . . .  
O279 O 0.1987 (14) -0.7289 (13) 0.2530 (7) 0.032 (8) Uiso 1 1 d . . . .  
O280 O 0.1532 (13) -0.7768 (13) 0.3114 (6) 0.027 (8) Uiso 1 1 d . . . .  
O281 O 0.1070 (13) -0.7388 (13) 0.3643 (7) 0.028 (8) Uiso 1 1 d . . . .  
O282 O 0.0923 (15) -0.8513 (14) 0.3583 (7) 0.042 (9) Uiso 1 1 d . . . .  
O283 O 0.1855 (16) -0.8206 (15) 0.3920 (8) 0.047 (10) Uiso 1 1 d . . . .  
O284 O 0.1655 (14) -0.7153 (13) 0.4089 (7) 0.029 (8) Uiso 1 1 d . . . .  
O285 O 0.1620 (15) -0.8138 (14) 0.4543 (7) 0.041 (9) Uiso 1 1 d . . . .  
O286 O 0.2554 (17) -0.7420 (16) 0.4451 (8) 0.058 (11) Uiso 1 1 d . . . .  
O287 O 0.2940 (14) -0.7547 (13) 0.3905 (7) 0.031 (8) Uiso 1 1 d . . . .  
O288 O 0.3483 (12) -0.6969 (12) 0.3393 (6) 0.018 (7) Uiso 1 1 d . . . .  
O289 O 0.2476 (13) -0.7626 (12) 0.3403 (6) 0.026 (8) Uiso 1 1 d . . . .  
O290 O 0.2717 (13) -0.8128 (12) 0.2908 (6) 0.024 (8) Uiso 1 1 d . . . .  
O291 O 0.2172 (15) -0.8691 (14) 0.3438 (7) 0.038 (9) Uiso 1 1 d . . . .  
O292 O 0.2790 (14) -0.8476 (13) 0.4263 (7) 0.036 (9) Uiso 1 1 d . . . .  
O293 O 0.3717 (15) -0.7876 (14) 0.4272 (7) 0.040 (9) Uiso 1 1 d . . . .  
O294 O 0.4290 (13) -0.7159 (12) 0.2925 (6) 0.020 (7) Uiso 1 1 d . . . .  
O295 O 0.4686 (13) -0.7069 (12) 0.3454 (6) 0.020 (7) Uiso 1 1 d . . . .  
O296 O 0.3795 (13) -0.8131 (13) 0.3198 (6) 0.027 (8) Uiso 1 1 d . . . .  
O297 O 0.4183 (12) -0.8013 (12) 0.3690 (6) 0.018 (7) Uiso 1 1 d . . . .  
O298 O 0.3245 (14) -0.8629 (13) 0.3695 (7) 0.030 (8) Uiso 1 1 d . . . .  
O299 O 0.4087 (15) -0.8999 (14) 0.4121 (7) 0.042 (9) Uiso 1 1 d . . . .  
O300 O 0.5090 (14) -0.8073 (13) 0.3195 (7) 0.029 (8) Uiso 1 1 d . . . .  
O301 O 0.3378 (15) -0.9144 (14) 0.3163 (7) 0.042 (9) Uiso 1 1 d . . . .  
O302 O 0.1346 (15) -0.6278 (14) 0.3597 (7) 0.038 (9) Uiso 1 1 d . . . .  
O303 O 0.0673 (15) -0.5815 (15) 0.3062 (7) 0.045 (10) Uiso 1 1 d . . . .  
O304 O 0.2240 (15) -0.4866 (14) 0.2995 (7) 0.040 (9) Uiso 1 1 d . . . .  
O305 O 0.1687 (15) -0.5487 (14) 0.2635 (7) 0.038 (9) Uiso 1 1 d . . . .  
O306 O 0.1012 (14) -0.4924 (13) 0.3368 (7) 0.033 (8) Uiso 1 1 d . . . .  
O307 O 0.0078 (11) -0.3924 (10) 0.3308 (5) 0.005 (6) Uiso 1 1 d . . . .  
O308 O 0.0715 (11) -0.3965 (11) 0.3724 (5) 0.009 (6) Uiso 1 1 d . . . .  
O309 O -0.1440 (14) -0.4699 (13) 0.3714 (7) 0.036 (9) Uiso 1 1 d . . . .  
O310 O -0.128 (3) 0.220 (2) 0.1355 (13) 0.14 (2) Uiso 1 1 d . . . .  
O311 O -0.252 (2) 0.0660 (18) 0.0549 (10) 0.081 (14) Uiso 1 1 d . . . .  
O312 O -0.229 (3) 0.156 (3) 0.2572 (14) 0.16 (2) Uiso 1 1 d . . . .  
O313 O -0.225 (2) 0.144 (2) 0.3463 (12) 0.121 (19) Uiso 1 1 d . . . .  
O314 O -0.414 (3) -0.098 (2) 0.4585 (12) 0.127 (19) Uiso 1 1 d . . . .  
O315 O -0.281 (3) -0.238 (3) 0.4941 (16) 0.19 (3) Uiso 1 1 d . . . .  
O317 O -0.542 (2) -0.1651 (18) 0.3363 (9) 0.082 (14) Uiso 1 1 d . . . .  
O319 O -0.348 (3) -0.347 (2) 0.2524 (12) 0.13 (2) Uiso 1 1 d . . . .  
O320 O -0.1410 (16) -0.0244 (15) 0.0519 (8) 0.053 (11) Uiso 1 1 d . . . .  
O321 O -0.2954 (14) -0.0561 (13) 0.0394 (7) 0.030 (8) Uiso 1 1 d . . . .  
O322 O -0.344 (3) -0.244 (3) 0.0433 (15) 0.05 (2) Uiso 0.50 1 d P . . . .  
O323 O -0.4073 (18) -0.0808 (17) 0.0081 (9) 0.068 (12) Uiso 1 1 d . . . .  
O324 O 0.0000 0.0000 0.0000 0.030 (12) Uiso 1 2 d S . . . .  
O325 O -0.298 (2) -0.298 (2) -0.0170 (12) 0.116 (18) Uiso 1 1 d . . . .  
O326 O 0.110 (2) -0.253 (2) -0.0177 (11) 0.101 (16) Uiso 1 1 d . . . .  
O327 O -0.042 (3) -0.423 (3) 0.0007 (15) 0.18 (3) Uiso 1 1 d . . . .  
O328 O 0.0078 (14) -0.3029 (14) 0.0208 (7) 0.036 (9) Uiso 1 1 d . . . .  
O329 O 0.249 (3) -0.418 (3) -0.0435 (13) 0.14 (2) Uiso 1 1 d . . . .  
O330 O -0.048 (2) -0.147 (2) 0.4398 (11) 0.112 (17) Uiso 1 1 d . . . .  
O331 O 0.261 (2) -0.592 (2) 0.4836 (11) 0.113 (18) Uiso 1 1 d . . . .  
O332 O -0.220 (4) -0.729 (4) 0.3299 (19) 0.23 (4) Uiso 1 1 d . . . .  
O333 O 0.188 (3) -0.428 (3) 0.3968 (13) 0.14 (2) Uiso 1 1 d . . . .  
O334 O 0.384 (3) -1.050 (2) 0.3385 (13) 0.13 (2) Uiso 1 1 d . . . .  
O335 O -0.0472 (16) -0.8483 (15) 0.3762 (8) 0.049 (10) Uiso 1 1 d . . . .  
O336 O -0.067 (2) -0.879 (2) 0.3297 (12) 0.115 (18) Uiso 1 1 d . . . .  
O337 O 0.111 (2) -0.7382 (19) 0.5073 (10) 0.090 (15) Uiso 1 1 d . . . .  
O338 O 0.021 (3) -0.794 (3) 0.2926 (16) 0.20 (3) Uiso 1 1 d . . . .  
O339 O 0.266 (3) -0.965 (3) 0.4005 (16) 0.18 (3) Uiso 1 1 d . . . .  
O340 O -0.2368 (13) 0.1566 (12) 0.0623 (6) 0.021 (7) Uiso 1 1 d . . . .  
O341 O 0.4029 (19) -0.9942 (18) 0.2947 (9) 0.075 (13) Uiso 1 1 d . . . .  
O342 O 0.708 (5) -0.766 (4) 0.385 (2) 0.11 (4) Uiso 0.50 1 d P . . . .

O343 O 0.614(2) -0.8383(19) 0.3608(10) 0.083(14) Uiso 1 1 d . . . .  
O344 O 0.604(3) -0.689(2) 0.3401(13) 0.14(2) Uiso 1 1 d . . . .  
O345 O 0.662(3) -0.776(2) 0.2941(13) 0.13(2) Uiso 1 1 d . . . .  
O346 O -0.1547(17) -0.0542(16) 0.1342(8) 0.063(12) Uiso 1 1 d . . . .  
O347 O 0.5336(18) -0.7303(17) 0.2491(9) 0.067(12) Uiso 1 1 d . . . .  
O348 O 0.649(3) -0.846(3) 0.2322(16) 0.20(3) Uiso 1 1 d . . . .  
O349 O 0.443(2) -0.733(2) 0.2099(11) 0.099(16) Uiso 1 1 d . . . .  
O350 O 0.492(3) -0.584(2) 0.2070(12) 0.13(2) Uiso 1 1 d . . . .  
O351 O 0.416(2) -0.640(2) 0.1492(10) 0.096(15) Uiso 1 1 d . . . .  
O352 O 0.519(4) -0.487(4) 0.157(2) 0.26(4) Uiso 1 1 d . . . .  
O353 O 0.505(2) -0.707(2) 0.1135(11) 0.105(17) Uiso 1 1 d . . . .  
O354 O 0.1267(11) 0.3936(10) 0.0540(5) 0.004(6) Uiso 1 1 d . . . .  
O355 O 0.357(2) -0.4910(19) 0.2865(10) 0.087(14) Uiso 1 1 d . . . .  
O356 O 0.2843(15) -0.5152(14) 0.2359(7) 0.044(10) Uiso 1 1 d . . . .  
O357 O 0.686(2) -0.329(2) 0.0924(11) 0.105(17) Uiso 1 1 d . . . .  
O358 O 0.5435(16) -0.0478(15) 0.2763(8) 0.053(10) Uiso 1 1 d . . . .  
O359 O 0.438(3) -0.223(2) 0.2131(12) 0.13(2) Uiso 1 1 d . . . .  
O360 O -0.288(3) -0.358(3) 0.3681(15) 0.17(3) Uiso 1 1 d . . . .  
O361 O -0.1224(12) -0.5236(11) 0.4309(6) 0.013(7) Uiso 1 1 d . . . .  
O362 O -0.0846(12) -0.6405(12) 0.4420(6) 0.018(7) Uiso 1 1 d . . . .  
O363 O -0.1112(13) -0.5937(12) 0.3877(6) 0.022(8) Uiso 1 1 d . . . .  
O364 O -0.0969(19) -0.6064(18) 0.2722(9) 0.075(13) Uiso 1 1 d . . . .  
O365 O 0.0950(16) -0.2069(15) 0.4636(8) 0.054(11) Uiso 1 1 d . . . .  
O366 O 0.487(2) -0.2152(18) 0.1539(10) 0.082(14) Uiso 1 1 d . . . .  
O367 O 0.539(2) -0.1980(18) 0.0674(9) 0.082(14) Uiso 1 1 d . . . .  
O368 O -0.0852(14) -0.3713(13) 0.2914(7) 0.033(9) Uiso 1 1 d . . . .  
O369 O -0.338(2) -0.1516(18) 0.0376(9) 0.082(14) Uiso 1 1 d . . . .  
O370 O 0.764(2) 0.252(2) 0.0438(12) 0.119(18) Uiso 1 1 d . . . .  
O371 O 0.782(3) 0.122(3) 0.1182(13) 0.14(2) Uiso 1 1 d . . . .  
O372 O 0.387(2) 0.2062(19) 0.2531(10) 0.090(15) Uiso 1 1 d . . . .  
O373 O 0.0414(15) -0.0794(14) 0.4025(7) 0.039(9) Uiso 1 1 d . . . .  
O374 O 0.166(3) 0.114(2) 0.2761(13) 0.13(2) Uiso 1 1 d . . . .  
O375 O 0.4852(18) -0.8622(17) 0.2627(9) 0.069(12) Uiso 1 1 d . . . .  
O376 O -0.1789(19) 0.0042(18) 0.2039(9) 0.074(13) Uiso 1 1 d . . . .  
O377 O -0.1296(14) -0.1611(13) 0.1909(7) 0.030(8) Uiso 1 1 d . . . .  
O378 O 0.3752(16) -0.1144(15) 0.2280(8) 0.047(10) Uiso 1 1 d . . . .  
O379 O 0.2931(15) -0.6661(14) 0.1403(7) 0.039(9) Uiso 1 1 d . . . .  
O380 O 0.3701(19) -0.3376(18) 0.2372(9) 0.076(13) Uiso 1 1 d . . . .  
O381 O 0.193(3) 0.330(2) 0.1570(12) 0.13(2) Uiso 1 1 d . . . .  
O382 O 0.089(3) -0.597(3) 0.2361(16) 0.19(3) Uiso 1 1 d . . . .  
O383 O 0.196(2) 0.216(2) 0.1892(11) 0.107(17) Uiso 1 1 d . . . .  
O385 O 0.616(3) -0.247(3) 0.1848(16) 0.19(3) Uiso 1 1 d . . . .  
O386 O -0.377(4) -0.353(3) 0.3131(18) 0.07(3) Uiso 0.50 1 d P . . . .  
O387 O -0.127(3) -0.614(2) 0.0686(13) 0.14(2) Uiso 1 1 d . . . .  
O388 O 0.828(3) -0.803(3) 0.3952(15) 0.18(3) Uiso 1 1 d . . . .  
O389 O 0.3240(19) -0.0973(18) 0.0013(9) 0.077(13) Uiso 1 1 d . . . .  
O390 O -0.505(2) -0.224(2) 0.2990(11) 0.101(16) Uiso 1 1 d . . . .  
O391 O 0.5131(16) -0.9228(15) 0.3622(8) 0.055(11) Uiso 1 1 d . . . .  
O392 O -0.1690(18) -0.3054(17) -0.0115(9) 0.071(13) Uiso 1 1 d . . . .  
O393 O -0.0378(15) -0.0211(14) 0.2267(7) 0.040(9) Uiso 1 1 d . . . .  
O394 O 0.2919(14) 0.1043(13) 0.2484(7) 0.034(9) Uiso 1 1 d . . . .  
O395 O 0.1844(14) -0.9818(13) 0.3604(7) 0.031(8) Uiso 1 1 d . . . .  
O396 O 0.1953(15) -0.5539(14) 0.1933(7) 0.041(9) Uiso 1 1 d . . . .  
Na1 Na 0.0556(11) -0.1251(10) 0.1717(5) 0.066(7) Uiso 1 1 d . . . .  
Na2 Na 0.5376(9) -0.4742(8) 0.0095(4) 0.040(5) Uiso 1 1 d . . . .  
Na3 Na -0.2194(9) -0.1063(8) 0.0906(4) 0.036(5) Uiso 1 1 d . . . .  
Na4 Na 0.6260(11) -0.2370(11) 0.1348(5) 0.071(7) Uiso 1 1 d . . . .  
Na5 Na 0.7302(12) -0.1309(11) 0.1792(6) 0.076(8) Uiso 1 1 d . . . .  
Na6 Na 0.3757(8) -1.0010(8) 0.3763(4) 0.030(5) Uiso 1 1 d . . . .  
Na7 Na 0.4038(10) -0.6309(10) 0.2023(5) 0.056(6) Uiso 1 1 d . . . .  
Na8 Na 0.2973(11) -0.6620(10) 0.2053(5) 0.067(7) Uiso 1 1 d . . . .  
Na9 Na -0.4180(12) 0.1753(11) 0.2744(6) 0.075(8) Uiso 1 1 d . . . .  
Na10 Na -0.2081(11) -0.0699(10) 0.1823(5) 0.066(7) Uiso 1 1 d . . . .  
Na11 Na -0.2304(11) -0.1890(10) 0.0565(5) 0.066(7) Uiso 1 1 d . . . .

Na12 Na -0.2240(11) -0.4636(10) 0.2678(5) 0.062(7) Uiso 1 1 d . . . .  
Na13 Na 0.0413(12) -0.9508(11) 0.3788(6) 0.080(8) Uiso 1 1 d . . . .  
Na14 Na 0.3501(12) -0.6735(11) 0.0958(6) 0.077(8) Uiso 1 1 d . . . .  
K1 K -0.0678(7) -0.6329(6) 0.1223(4) 0.078(5) Uani 1 1 d . . . .  
K2 K -0.0056(6) -0.6334(5) 0.5736(3) 0.041(3) Uani 1 1 d . . . .  
K3 K 0.6106(6) 0.0151(5) 0.2281(3) 0.044(3) Uani 1 1 d . . . .  
K4 K 0.0765(8) 0.3742(6) 0.1064(5) 0.108(7) Uani 1 1 d . . . .  
As1 As 0.4694(2) 0.0377(2) 0.12686(10) 0.0194(12) Uani 1 1 d . . . .  
As2 As 0.1206(2) 0.08860(19) 0.09444(10) 0.0176(12) Uani 1 1 d . . . .  
As3 As 0.2799(2) -0.36496(18) 0.10227(10) 0.0113(11) Uani 1 1 d . . . .  
As4 As -0.0729(2) -0.38446(19) 0.15106(10) 0.0147(11) Uani 1 1 d . . . .  
. . . .  
As5 As 0.1222(2) -0.1863(2) 0.31065(10) 0.0215(12) Uani 1 1 d . . . .  
As6 As -0.2309(2) -0.1141(2) 0.34922(11) 0.0255(13) Uani 1 1 d . . . .  
As7 As -0.0636(2) -0.5816(2) 0.41642(11) 0.0233(13) Uani 1 1 d . . . .  
As8 As 0.2689(2) -0.7050(2) 0.35705(11) 0.0250(13) Uani 1 1 d . . . .  
Cs1 Cs 0.08103(15) -0.13012(14) 0.01949(8) 0.0350(9) Uani 1 1 d . . . .  
Cs2 Cs 0.28953(15) -0.18018(14) 0.17746(7) 0.0328(8) Uani 1 1 d . . . .  
Cs3 Cs 0.10335(16) -0.40845(14) 0.27026(7) 0.0351(9) Uani 1 1 d . . . .  
Cs4 Cs 0.6838(2) -0.2072(2) 0.23505(11) 0.0800(15) Uani 1 1 d . . . .  
Cs5 Cs 0.4277(3) -0.2083(3) 0.00417(12) 0.113(2) Uani 1 1 d . . . .  
Cs6 Cs -0.2260(4) -0.3680(4) 0.3152(2) 0.135(3) Uani 0.80 1 d P . . . .  
Ho1 Ho 0.39402(10) -0.06507(9) 0.08657(5) 0.0174(5) Uani 1 1 d . . . .  
Ho2 Ho 0.16101(11) 0.02912(9) 0.17365(5) 0.0202(6) Uani 1 1 d . . . .  
Ho3 Ho 0.20448(9) -0.35269(8) 0.18189(4) 0.0107(5) Uani 1 1 d . . . .  
Ho4 Ho -0.01041(9) -0.24405(8) 0.11378(4) 0.0112(5) Uani 1 1 d . . . .  
Ho5 Ho 0.00119(9) -0.21736(9) 0.26254(4) 0.0134(5) Uani 1 1 d . . . .  
Ho6 Ho -0.13433(10) -0.25544(10) 0.38611(5) 0.0222(6) Uani 1 1 d . . . .  
. . . .  
Ho7 Ho 0.08484(10) -0.55259(10) 0.44615(5) 0.0238(6) Uani 1 1 d . . . .  
Ho8 Ho 0.17391(11) -0.57207(10) 0.31690(5) 0.0276(6) Uani 1 1 d . . . .  
W1 W 0.58766(10) 0.14181(9) 0.08629(5) 0.0267(5) Uani 1 1 d . . . .  
W2 W 0.64828(10) 0.01333(9) 0.14051(5) 0.0261(5) Uani 1 1 d . . . .  
W3 W 0.54207(10) 0.13943(9) 0.16897(5) 0.0271(5) Uani 1 1 d . . . .  
W4 W 0.43059(10) 0.04739(9) 0.20334(4) 0.0267(5) Uani 1 1 d . . . .  
W5 W 0.54087(10) -0.07653(9) 0.18026(4) 0.0253(5) Uani 1 1 d . . . .  
W6 W 0.57867(9) -0.07841(8) 0.10578(4) 0.0215(5) Uani 1 1 d . . . .  
W7 W 0.52265(10) 0.04688(9) 0.05123(4) 0.0236(5) Uani 1 1 d . . . .  
W8 W 0.43178(10) 0.16870(9) 0.07076(5) 0.0273(5) Uani 1 1 d . . . .  
W9 W 0.38851(10) 0.16675(9) 0.15294(5) 0.0254(5) Uani 1 1 d . . . .  
W10 W 0.29664(9) 0.08570(8) 0.10997(4) 0.0204(5) Uani 1 1 d . . . .  
W11 W 0.18638(11) 0.22880(8) 0.09334(5) 0.0332(6) Uani 1 1 d . . . .  
W12 W 0.23341(9) 0.13245(8) 0.03547(4) 0.0212(5) Uani 1 1 d . . . .  
W13 W 0.16109(9) 0.01233(8) 0.03300(4) 0.0157(5) Uani 1 1 d . . . .  
W14 W 0.02560(9) -0.02734(8) 0.08771(4) 0.0181(5) Uani 1 1 d . . . .  
W15 W -0.01443(10) 0.05726(9) 0.14268(4) 0.0281(6) Uani 1 1 d . . . .  
W16 W 0.06523(11) 0.18599(9) 0.14510(5) 0.0355(6) Uani 1 1 d . . . .  
W17 W 0.03194(11) 0.24244(9) 0.07383(5) 0.0349(6) Uani 1 1 d . . . .  
W18 W 0.08406(9) 0.14727(8) 0.01446(4) 0.0205(5) Uani 1 1 d . . . .  
W19 W -0.05156(9) 0.11010(9) 0.07116(4) 0.0258(5) Uani 1 1 d . . . .  
W20 W 0.19737(8) -0.07458(8) 0.10750(4) 0.0136(4) Uani 1 1 d . . . .  
W21 W 0.17410(8) -0.21428(7) 0.11485(4) 0.0106(4) Uani 1 1 d . . . .  
W22 W 0.24945(9) -0.25830(8) 0.04132(4) 0.0147(5) Uani 1 1 d . . . .  
W23 W 0.35816(8) -0.23344(8) 0.09533(4) 0.0138(4) Uani 1 1 d . . . .  
W24 W 0.39064(8) -0.34609(8) 0.14982(4) 0.0155(5) Uani 1 1 d . . . .  
W25 W 0.32992(9) -0.48625(8) 0.15162(4) 0.0183(5) Uani 1 1 d . . . .  
W26 W 0.23806(9) -0.51471(8) 0.09958(4) 0.0192(5) Uani 1 1 d . . . .  
W27 W 0.19542(9) -0.38829(8) 0.04308(4) 0.0158(5) Uani 1 1 d . . . .  
W28 W 0.35158(9) -0.37301(8) 0.02141(4) 0.0182(5) Uani 1 1 d . . . .  
W29 W 0.45883(8) -0.35273(8) 0.07764(4) 0.0173(5) Uani 1 1 d . . . .  
W30 W 0.39642(9) -0.49738(8) 0.07989(4) 0.0200(5) Uani 1 1 d . . . .  
W31 W 0.10451(8) -0.39617(7) 0.11952(4) 0.0127(4) Uani 1 1 d . . . .  
W32 W -0.01681(9) -0.46770(8) 0.08580(4) 0.0186(5) Uani 1 1 d . . . .  
W33 W 0.02262(9) -0.51880(8) 0.16357(4) 0.0182(5) Uani 1 1 d . . . .



W34 W -0.04063 (9) -0.45148 (8) 0.22334 (4) 0.0187 (5) Uani 1 1 d . . .  
W35 W -0.16103 (9) -0.32118 (9) 0.21462 (4) 0.0193 (5) Uani 1 1 d . . .  
W36 W -0.19386 (8) -0.26927 (8) 0.14369 (4) 0.0171 (5) Uani 1 1 d . . .  
W37 W -0.12119 (9) -0.34230 (8) 0.07972 (4) 0.0171 (5) Uani 1 1 d . . .  
W38 W -0.17546 (9) -0.47035 (8) 0.11269 (4) 0.0218 (5) Uani 1 1 d . . .  
W39 W -0.25086 (9) -0.39433 (9) 0.17840 (4) 0.0224 (5) Uani 1 1 d . . .  
W40 W -0.13224 (9) -0.52634 (8) 0.19019 (5) 0.0229 (5) Uani 1 1 d . . .  
W41 W 0.01795 (8) -0.30315 (7) 0.20166 (4) 0.0116 (4) Uani 1 1 d . . .  
W42 W 0.12942 (9) -0.09835 (8) 0.24179 (4) 0.0147 (5) Uani 1 1 d . . .  
W43 W 0.19410 (8) -0.25287 (8) 0.24944 (4) 0.0140 (5) Uani 1 1 d . . .  
W44 W 0.20916 (9) -0.33142 (9) 0.31796 (4) 0.0220 (5) Uani 1 1 d . . .  
W45 W 0.14202 (10) -0.25927 (10) 0.38337 (4) 0.0292 (6) Uani 1 1 d . . .  
W46 W 0.08431 (10) -0.11620 (10) 0.37499 (4) 0.0293 (6) Uani 1 1 d . . .  
W47 W 0.07349 (9) -0.02259 (9) 0.30205 (4) 0.0228 (5) Uani 1 1 d . . .  
W48 W 0.23507 (9) -0.06513 (9) 0.28660 (4) 0.0250 (5) Uani 1 1 d . . .  
W49 W 0.30507 (9) -0.22342 (9) 0.29202 (4) 0.0231 (5) Uani 1 1 d . . .  
W50 W 0.24334 (10) -0.15683 (10) 0.36132 (4) 0.0324 (6) Uani 1 1 d . . .  
W51 W -0.05295 (9) -0.12549 (8) 0.33159 (4) 0.0196 (5) Uani 1 1 d . . .  
W52 W -0.14111 (11) -0.01590 (9) 0.38089 (5) 0.0321 (6) Uani 1 1 d . . .  
W53 W -0.16595 (10) -0.00003 (9) 0.30023 (5) 0.0263 (5) Uani 1 1 d . . .  
W54 W -0.25793 (10) -0.08311 (10) 0.27251 (5) 0.0318 (6) Uani 1 1 d . . .  
W55 W -0.34611 (10) -0.18892 (10) 0.32408 (5) 0.0366 (6) Uani 1 1 d . . .  
W56 W -0.32498 (10) -0.20709 (10) 0.39806 (5) 0.0368 (6) Uani 1 1 d . . .  
W57 W -0.22104 (11) -0.11923 (9) 0.42659 (5) 0.0352 (6) Uani 1 1 d . . .  
W58 W -0.30394 (11) 0.00700 (10) 0.39557 (5) 0.0441 (7) Uani 1 1 d . . .  
W59 W -0.32677 (10) 0.02494 (9) 0.31381 (5) 0.0365 (6) Uani 1 1 d . . .  
W60 W -0.41299 (10) -0.08335 (10) 0.36770 (5) 0.0432 (7) Uani 1 1 d . . .  
W61 W 0.02878 (9) -0.32504 (8) 0.34260 (4) 0.0197 (5) Uani 1 1 d . . .  
W62 W 0.04083 (9) -0.46649 (8) 0.36301 (4) 0.0203 (5) Uani 1 1 d . . .  
W63 W -0.10675 (10) -0.52573 (9) 0.34353 (5) 0.0274 (5) Uani 1 1 d . . .  
W64 W -0.13030 (9) -0.42967 (8) 0.40235 (4) 0.0216 (5) Uani 1 1 d . . .  
W65 W -0.09803 (9) -0.49157 (9) 0.47249 (4) 0.0243 (5) Uani 1 1 d . . .  
W66 W -0.05171 (10) -0.65010 (9) 0.48923 (5) 0.0290 (6) Uani 1 1 d . . .  
W67 W -0.03770 (11) -0.74505 (9) 0.43783 (5) 0.0365 (6) Uani 1 1 d . . .  
W68 W -0.06542 (11) -0.67211 (9) 0.36142 (5) 0.0353 (6) Uani 1 1 d . . .  
W69 W -0.21361 (10) -0.61074 (10) 0.38448 (5) 0.0382 (6) Uani 1 1 d . . .  
W70 W -0.18555 (11) -0.67903 (10) 0.46214 (5) 0.0372 (6) Uani 1 1 d . . .  
W71 W -0.23388 (9) -0.51678 (9) 0.44543 (5) 0.0312 (6) Uani 1 1 d . . .  
W72 W 0.09394 (10) -0.66948 (9) 0.38890 (5) 0.0287 (6) Uani 1 1 d . . .  
W73 W 0.15029 (10) -0.80730 (9) 0.35368 (5) 0.0342 (6) Uani 1 1 d . . .  
W74 W 0.22060 (10) -0.73246 (9) 0.29025 (5) 0.0274 (6) Uani 1 1 d . . .  
W75 W 0.35279 (10) -0.64702 (9) 0.29093 (5) 0.0279 (6) Uani 1 1 d . . .  
W76 W 0.41181 (10) -0.63287 (10) 0.35569 (5) 0.0366 (6) Uani 1 1 d . . .  
W77 W 0.32998 (11) -0.70452 (11) 0.42514 (5) 0.0432 (7) Uani 1 1 d . . .  
W78 W 0.21093 (11) -0.78789 (10) 0.42443 (5) 0.0413 (7) Uani 1 1 d . . .  
W79 W 0.36238 (11) -0.83691 (10) 0.39964 (5) 0.0427 (7) Uani 1 1 d . . .  
W80 W 0.30421 (10) -0.85247 (9) 0.32687 (5) 0.0315 (6) Uani 1 1 d . . .  
W81 W 0.43944 (10) -0.76402 (9) 0.32802 (5) 0.0336 (6) Uani 1 1 d . . .  
W82 W 0.2545 (2) -0.5607 (2) 0.39351 (10) 0.0627 (14) Uani 0.60 1 d P . .

loop\_

\_atom\_site\_aniso\_label  
\_atom\_site\_aniso\_U\_11  
\_atom\_site\_aniso\_U\_22  
\_atom\_site\_aniso\_U\_33  
\_atom\_site\_aniso\_U\_23  
\_atom\_site\_aniso\_U\_13  
\_atom\_site\_aniso\_U\_12

K1 0.085 (11) 0.056 (10) 0.102 (13) -0.043 (9) -0.015 (10) 0.003 (9)  
K2 0.050 (8) 0.036 (7) 0.039 (8) -0.009 (6) -0.013 (6) 0.001 (6)  
K3 0.050 (8) 0.046 (8) 0.041 (8) -0.013 (6) -0.018 (6) 0.001 (7)  
K4 0.089 (12) 0.040 (9) 0.22 (2) -0.073 (12) -0.067 (13) 0.036 (9)  
As1 0.026 (3) 0.018 (3) 0.014 (3) 0.003 (2) -0.001 (2) -0.010 (2)  
As2 0.028 (3) 0.010 (3) 0.014 (3) -0.002 (2) -0.004 (2) 0.004 (2)

As3 0.012(2) 0.009(2) 0.013(3) -0.003(2) 0.000(2) -0.004(2)  
As4 0.017(3) 0.010(3) 0.019(3) -0.003(2) -0.001(2) -0.010(2)  
As5 0.023(3) 0.024(3) 0.016(3) -0.001(2) 0.001(2) -0.001(2)  
As6 0.026(3) 0.023(3) 0.026(3) -0.004(2) -0.005(2) 0.005(2)  
As7 0.026(3) 0.019(3) 0.023(3) 0.001(2) -0.001(2) -0.002(2)  
As8 0.032(3) 0.021(3) 0.020(3) -0.001(2) -0.002(2) 0.002(3)  
Cs1 0.0325(19) 0.030(2) 0.046(2) -0.0052(17) -0.0135(17) -0.0064(16)  
Cs2 0.038(2) 0.038(2) 0.0239(19) -0.0024(16) -0.0017(15) -0.0156(17)  
Cs3 0.044(2) 0.033(2) 0.025(2) 0.0036(16) -0.0049(16) -0.0007(17)  
Cs4 0.074(3) 0.081(3) 0.082(4) -0.016(3) 0.001(3) -0.004(3)  
Cs5 0.132(5) 0.110(5) 0.090(4) 0.003(3) 0.010(4) -0.030(4)  
Cs6 0.111(6) 0.122(7) 0.166(8) -0.019(6) 0.011(5) -0.014(5)  
Ho1 0.0251(13) 0.0135(12) 0.0151(13) 0.0012(10) -0.0043(10) -0.0094  
(10)  
Ho2 0.0332(14) 0.0133(12) 0.0149(13) -0.0013(10) -0.0055(10) -0.0034  
(11)  
Ho3 0.0132(11) 0.0067(11) 0.0118(12) 0.0007(9) -0.0008(9) -0.0025(9)  
Ho4 0.0150(11) 0.0103(11) 0.0089(11) -0.0005(9) -0.0049(9) -0.0018(9)  
Ho5 0.0167(12) 0.0123(12) 0.0100(12) -0.0001(9) -0.0004(9) 0.0006(10)  
Ho6 0.0240(13) 0.0229(13) 0.0163(13) 0.0002(10) 0.0010(10) 0.0035(11)  
Ho7 0.0263(13) 0.0245(13) 0.0154(13) 0.0042(10) 0.0023(10) 0.0038(11)  
Ho8 0.0342(14) 0.0214(14) 0.0230(14) 0.0022(11) 0.0004(11) 0.0028(12)  
W1 0.0346(13) 0.0255(12) 0.0233(13) -0.0006(10) -0.0048(10) -0.0172  
(10)  
W2 0.0298(12) 0.0256(12) 0.0257(13) -0.0024(10) -0.0059(10) -0.0112  
(10)  
W3 0.0367(13) 0.0243(12) 0.0249(13) -0.0048(10) -0.0079(10) -0.0140  
(10)  
W4 0.0361(13) 0.0278(13) 0.0182(12) -0.0009(10) -0.0058(10) -0.0110  
(11)  
W5 0.0341(13) 0.0258(12) 0.0179(12) 0.0014(10) -0.0103(10) -0.0094  
(10)  
W6 0.0277(12) 0.0215(12) 0.0174(12) -0.0011(9) -0.0053(9) -0.0101(10)  
W7 0.0395(13) 0.0218(12) 0.0128(11) 0.0022(9) -0.0047(9) -0.0186(10)  
W8 0.0400(13) 0.0176(12) 0.0269(13) 0.0054(10) -0.0110(10) -0.0156  
(10)  
W9 0.0342(13) 0.0183(12) 0.0275(13) -0.0054(10) -0.0090(10) -0.0084  
(10)  
W10 0.0324(12) 0.0130(11) 0.0188(12) 0.0010(9) -0.0102(9) -0.0101(9)  
W11 0.0683(17) 0.0089(11) 0.0254(13) -0.0015(10) -0.0179(12) -0.0046  
(11)  
W12 0.0333(12) 0.0169(11) 0.0148(11) 0.0046(9) -0.0064(9) -0.0122(10)  
W13 0.0252(11) 0.0114(10) 0.0122(11) -0.0012(8) -0.0040(9) -0.0070(9)  
W14 0.0196(11) 0.0185(11) 0.0162(11) 0.0020(9) -0.0042(9) -0.0046(9)  
W15 0.0317(13) 0.0306(13) 0.0172(12) 0.0017(10) -0.0004(10) 0.0065  
(11)  
W16 0.0665(17) 0.0177(12) 0.0212(13) -0.0067(10) -0.0117(11) 0.0104  
(12)  
W17 0.0651(16) 0.0137(12) 0.0246(13) -0.0028(10) -0.0150(12) 0.0096  
(11)  
W18 0.0336(12) 0.0149(11) 0.0143(11) 0.0021(9) -0.0088(9) -0.0060(10)  
W19 0.0283(12) 0.0248(12) 0.0212(12) 0.0007(10) -0.0050(10) 0.0058  
(10)  
W20 0.0176(10) 0.0097(10) 0.0136(11) 0.0011(8) -0.0032(8) -0.0040(9)  
W21 0.0135(10) 0.0067(10) 0.0120(10) 0.0014(8) -0.0018(8) -0.0053(8)  
W22 0.0210(11) 0.0132(10) 0.0101(10) 0.0012(8) -0.0021(8) -0.0054(9)  
W23 0.0143(10) 0.0118(10) 0.0159(11) -0.0005(8) -0.0015(8) -0.0051(9)  
W24 0.0133(10) 0.0166(11) 0.0168(11) -0.0003(9) -0.0030(8) -0.0042(9)  
W25 0.0201(11) 0.0120(10) 0.0199(11) 0.0015(9) 0.0001(9) 0.0025(9)  
W26 0.0204(11) 0.0087(10) 0.0285(12) -0.0048(9) 0.0011(9) -0.0017(9)  
W27 0.0213(11) 0.0165(11) 0.0122(11) -0.0062(9) -0.0005(9) -0.0077(9)  
W28 0.0202(11) 0.0201(11) 0.0147(11) -0.0043(9) 0.0014(9) -0.0045(9)  
W29 0.0125(10) 0.0193(11) 0.0197(11) -0.0023(9) 0.0014(8) -0.0031(9)  
W30 0.0225(11) 0.0130(11) 0.0231(12) -0.0036(9) 0.0032(9) -0.0007(9)

W31 0.0162 (10) 0.0086 (10) 0.0147 (11) -0.0041 (8) -0.0025 (8) -0.0029 (8)  
W32 0.0235 (11) 0.0138 (11) 0.0227 (12) -0.0068 (9) -0.0064 (9) -0.0088 (9)  
W33 0.0212 (11) 0.0087 (10) 0.0256 (12) 0.0007 (9) -0.0033 (9) -0.0070 (9)  
W34 0.0191 (11) 0.0198 (11) 0.0165 (11) 0.0051 (9) -0.0035 (9) -0.0069 (9)  
W35 0.0141 (10) 0.0272 (12) 0.0162 (11) -0.0035 (9) -0.0002 (8) -0.0023 (9)  
W36 0.0145 (10) 0.0198 (11) 0.0180 (11) -0.0027 (9) -0.0064 (8) -0.0013 (9)  
W37 0.0199 (11) 0.0175 (11) 0.0159 (11) -0.0022 (9) -0.0069 (9) -0.0049 (9)  
W38 0.0234 (11) 0.0205 (12) 0.0263 (12) -0.0039 (10) -0.0082 (9) -0.0136  
(10)  
W39 0.0156 (11) 0.0290 (12) 0.0237 (12) -0.0002 (10) -0.0031 (9) -0.0093  
(10)  
W40 0.0246 (12) 0.0180 (11) 0.0276 (13) 0.0025 (10) -0.0039 (10) -0.0131  
(10)  
W41 0.0136 (10) 0.0100 (10) 0.0099 (10) 0.0022 (8) -0.0007 (8) -0.0012 (8)  
W42 0.0216 (11) 0.0109 (10) 0.0122 (11) 0.0009 (8) -0.0034 (8) -0.0053 (9)  
W43 0.0138 (10) 0.0163 (11) 0.0117 (11) -0.0001 (8) -0.0004 (8) -0.0033 (9)  
W44 0.0195 (11) 0.0254 (12) 0.0168 (11) 0.0078 (9) -0.0021 (9) 0.0014 (10)  
W45 0.0292 (12) 0.0433 (14) 0.0121 (12) 0.0067 (10) -0.0036 (9) -0.0042  
(11)  
W46 0.0334 (13) 0.0442 (14) 0.0115 (12) -0.0063 (10) -0.0043 (9) -0.0046  
(11)  
W47 0.0324 (12) 0.0225 (12) 0.0158 (12) -0.0059 (9) -0.0035 (9) -0.0069  
(10)  
W48 0.0284 (12) 0.0331 (13) 0.0160 (12) -0.0033 (10) -0.0053 (9) -0.0100  
(10)  
W49 0.0193 (11) 0.0329 (13) 0.0169 (12) 0.0020 (10) -0.0040 (9) -0.0069  
(10)  
W50 0.0340 (13) 0.0509 (15) 0.0133 (12) 0.0013 (11) -0.0091 (10) -0.0091  
(12)  
W51 0.0271 (12) 0.0204 (11) 0.0106 (11) -0.0027 (9) -0.0003 (9) -0.0014  
(10)  
W52 0.0459 (14) 0.0278 (13) 0.0233 (13) -0.0097 (10) 0.0012 (11) -0.0042  
(11)  
W53 0.0290 (12) 0.0229 (12) 0.0243 (13) 0.0026 (10) -0.0024 (10) 0.0000  
(10)  
W54 0.0281 (12) 0.0418 (14) 0.0251 (13) -0.0015 (11) -0.0070 (10) -0.0026  
(11)  
W55 0.0283 (13) 0.0401 (15) 0.0398 (15) 0.0034 (12) -0.0091 (11) -0.0037  
(11)  
W56 0.0295 (13) 0.0361 (14) 0.0365 (15) 0.0064 (11) 0.0076 (11) 0.0031 (11)  
W57 0.0469 (14) 0.0354 (14) 0.0183 (13) -0.0049 (10) 0.0094 (11) 0.0030  
(12)  
W58 0.0480 (15) 0.0353 (14) 0.0421 (16) -0.0094 (12) 0.0117 (12) 0.0104  
(13)  
W59 0.0275 (13) 0.0286 (13) 0.0455 (15) 0.0068 (11) 0.0009 (11) 0.0076 (11)  
W60 0.0242 (13) 0.0405 (15) 0.0547 (17) 0.0083 (13) 0.0056 (12) 0.0077 (12)  
W61 0.0219 (11) 0.0233 (12) 0.0101 (11) 0.0050 (9) -0.0002 (9) 0.0012 (10)  
W62 0.0202 (11) 0.0212 (11) 0.0146 (11) 0.0051 (9) 0.0021 (9) 0.0029 (9)  
W63 0.0317 (12) 0.0282 (13) 0.0220 (12) 0.0007 (10) -0.0047 (10) -0.0054  
(10)  
W64 0.0177 (11) 0.0229 (12) 0.0199 (12) 0.0056 (9) 0.0013 (9) 0.0006 (10)  
W65 0.0260 (12) 0.0286 (12) 0.0144 (11) 0.0039 (9) 0.0020 (9) -0.0012 (10)  
W66 0.0354 (13) 0.0248 (12) 0.0226 (13) 0.0059 (10) 0.0021 (10) -0.0029  
(11)  
W67 0.0474 (15) 0.0219 (12) 0.0365 (15) 0.0023 (11) 0.0035 (12) -0.0046  
(11)  
W68 0.0465 (15) 0.0254 (13) 0.0346 (14) -0.0045 (11) -0.0030 (11) -0.0062  
(11)  
W69 0.0349 (14) 0.0381 (15) 0.0438 (16) -0.0015 (12) -0.0086 (12) -0.0133  
(12)  
W70 0.0399 (14) 0.0288 (13) 0.0400 (15) 0.0045 (11) 0.0065 (12) -0.0132  
(11)  
W71 0.0227 (12) 0.0366 (14) 0.0313 (14) 0.0022 (11) 0.0025 (10) -0.0047  
(11)

W72 0.0354(13) 0.0223(12) 0.0234(13) 0.0038(10) 0.0020(10) 0.0025(11)  
W73 0.0385(14) 0.0191(12) 0.0401(15) 0.0010(11) 0.0032(11) 0.0025(11)  
W74 0.0335(13) 0.0207(12) 0.0262(13) -0.0032(10) -0.0023(10) 0.0023  
(10)  
W75 0.0317(13) 0.0221(12) 0.0278(13) -0.0023(10) 0.0006(10) -0.0004  
(10)  
W76 0.0335(13) 0.0377(14) 0.0386(15) -0.0114(12) -0.0038(11) 0.0034  
(12)  
W77 0.0452(15) 0.0544(16) 0.0253(14) -0.0042(12) -0.0073(11) 0.0134  
(13)  
W78 0.0505(15) 0.0322(14) 0.0301(14) 0.0126(11) 0.0043(12) 0.0082(12)  
W79 0.0481(15) 0.0374(14) 0.0330(14) 0.0065(11) -0.0039(12) 0.0164  
(13)  
W80 0.0387(13) 0.0153(12) 0.0378(14) -0.0041(10) -0.0008(11) 0.0046  
(11)  
W81 0.0323(13) 0.0301(13) 0.0370(14) -0.0075(11) -0.0040(11) 0.0054  
(11)  
W82 0.063(3) 0.066(3) 0.056(3) -0.011(3) 0.000(2) 0.002(3)

\_geom\_special\_details

;

All esds (except the esd in the dihedral angle between two l.s.  
planes)  
are estimated using the full covariance matrix. The cell esds are  
taken  
into account individually in the estimation of esds in distances,  
angles  
and torsion angles; correlations between esds in cell parameters are  
only  
used when they are defined by crystal symmetry. An approximate  
(isotropic)  
treatment of cell esds is used for estimating esds involving l.s.  
planes.

;

loop\_

\_geom\_bond\_atom\_site\_label\_1  
\_geom\_bond\_atom\_site\_label\_2  
\_geom\_bond\_distance  
\_geom\_bond\_site\_symmetry\_2  
\_geom\_bond\_publ\_flag  
O1 W1 1.66(4) . ?  
O2 W2 1.73(3) . ?  
O2 Na10 2.69(4) 1\_655 ?  
O3 W3 1.75(3) . ?  
O4 W4 1.69(3) . ?  
O5 W5 1.74(3) . ?  
O5 Cs4 3.12(3) . ?  
O6 W6 1.75(3) . ?  
O6 Na4 2.91(4) . ?  
O7 W7 1.74(3) . ?  
O8 W8 1.70(3) . ?  
O9 W9 1.65(3) . ?  
O10 W1 1.90(3) . ?  
O10 W2 1.91(3) . ?  
O11 W3 1.88(2) . ?  
O11 W2 1.99(2) . ?  
O11 K3 2.97(3) . ?  
O12 W3 1.93(3) . ?  
O12 W1 1.96(3) . ?  
O13 W1 1.89(3) . ?  
O13 W7 2.08(3) . ?  
O13 Cs5 3.30(3) 2\_655 ?  
O14 W2 1.80(3) . ?

O14 W6 2.10(3) . ?  
O14 Na3 2.99(3) 1\_655 ?  
O15 W2 1.89(3) . ?  
O15 W5 2.05(3) . ?  
O15 K3 2.82(3) . ?  
O15 Na5 2.86(3) . ?  
O16 W3 1.81(3) . ?  
O16 W4 2.13(3) . ?  
O16 K3 3.09(3) . ?  
O17 W9 1.90(3) . ?  
O17 W3 1.96(3) . ?  
O18 W1 1.80(3) . ?  
O18 W8 2.09(3) . ?  
O18 Cs5 3.38(3) 2\_655 ?  
O19 W8 1.94(3) . ?  
O19 W7 1.97(3) . ?  
O19 Cs5 3.40(4) 2\_655 ?  
O20 W7 1.88(3) . ?  
O20 W6 1.99(3) . ?  
O21 W5 1.91(3) . ?  
O21 W6 1.94(3) . ?  
O21 Na4 2.95(4) . ?  
O22 W5 1.85(3) . ?  
O22 W4 1.98(3) . ?  
O22 K3 2.87(3) . ?  
O23 W9 1.91(3) . ?  
O23 W4 1.95(2) . ?  
O24 W8 1.90(3) . ?  
O24 W9 1.94(3) . ?  
O25 As1 1.83(3) . ?  
O25 W3 2.28(3) . ?  
O25 W9 2.31(2) . ?  
O25 W4 2.33(3) . ?  
O26 As1 1.76(2) . ?  
O26 W6 2.27(3) . ?  
O26 W5 2.39(3) . ?  
O26 W2 2.41(3) . ?  
O27 As1 1.82(3) . ?  
O27 W7 2.24(3) . ?  
O27 W1 2.33(3) . ?  
O27 W8 2.44(3) . ?  
O28 W7 1.80(3) . ?  
O28 Ho1 2.29(3) . ?  
O29 W6 1.81(3) . ?  
O29 Ho1 2.33(3) . ?  
O30 W5 1.78(3) . ?  
O31 W4 1.75(3) . ?  
O32 W10 1.85(3) . ?  
O32 W9 2.01(3) . ?  
O33 W8 1.78(3) . ?  
O33 W10 2.09(3) . ?  
O34 W10 1.77(3) . ?  
O34 Ho1 2.28(3) . ?  
O35 W10 1.77(3) . ?  
O35 Ho2 2.23(3) . ?  
O36 Ho1 2.33(3) . ?  
O37 Ho1 2.42(3) . ?  
O37 Cs2 3.08(3) . ?  
O38 Ho1 2.39(3) . ?  
O38 Cs5 3.36(3) . ?  
O39 W11 1.80(3) . ?  
O39 W10 2.11(3) . ?  
O40 W12 1.89(3) . ?  
O40 W10 1.92(3) . ?

O41 W12 1.87(3) . ?  
O41 W11 1.93(3) . ?  
O42 W11 1.91(3) . ?  
O42 W16 2.02(4) . ?  
O42 K4 3.29(4) . ?  
O43 W15 1.86(3) . ?  
O43 W16 1.95(3) . ?  
O44 W14 1.90(3) . ?  
O44 W15 1.98(3) . ?  
O45 W13 1.88(2) . ?  
O45 W14 1.94(2) . ?  
O45 Cs1 3.35(2) . ?  
O46 W12 1.95(3) . ?  
O46 W13 1.96(3) . ?  
O47 As2 1.83(3) . ?  
O47 W18 2.24(3) . ?  
O47 W13 2.29(3) . ?  
O47 W12 2.29(3) . ?  
O48 As2 1.79(3) . ?  
O48 W16 2.26(3) . ?  
O48 W17 2.38(3) . ?  
O48 W11 2.43(3) . ?  
O49 As2 1.79(3) . ?  
O49 W15 2.30(3) . ?  
O49 W19 2.37(3) . ?  
O49 W14 2.39(3) . ?  
O50 W11 1.62(3) . ?  
O50 Na14 2.99(4) 1\_565 ?  
O51 W16 1.71(3) . ?  
O52 W16 1.81(3) . ?  
O52 Ho2 2.28(3) . ?  
O53 W15 1.80(3) . ?  
O53 Ho2 2.32(3) . ?  
O54 W15 1.75(3) . ?  
O55 W14 1.79(3) . ?  
O55 W20 2.14(3) . ?  
O56 W14 1.68(3) . ?  
O56 Cs1 3.23(3) . ?  
O57 W20 1.90(3) . ?  
O57 W13 1.94(3) . ?  
O58 W13 1.71(3) . ?  
O58 Cs1 3.12(3) . ?  
O59 W12 1.71(4) . ?  
O60 W12 1.91(3) . ?  
O60 W18 1.93(3) . ?  
O60 Na11 2.97(4) 2 ?  
O61 W17 1.92(3) . ?  
O61 W11 2.02(3) . ?  
O61 K4 2.95(3) . ?  
O62 W17 1.85(3) . ?  
O62 W16 2.04(3) . ?  
O62 K1 3.15(3) 1\_565 ?  
O62 K4 3.33(4) . ?  
O63 W19 1.86(3) . ?  
O63 W15 2.10(3) . ?  
O64 W19 1.92(3) . ?  
O64 W14 2.06(3) . ?  
O65 W13 1.89(2) . ?  
O65 W18 1.99(2) . ?  
O66 W18 1.81(3) . ?  
O66 W19 2.04(3) . ?  
O66 Cs1 3.20(3) 2 ?  
O67 W19 1.89(3) . ?  
O67 W17 1.94(3) . ?

O68 W18 1.88 (3) . ?  
O68 W17 1.99 (3) . ?  
O69 W19 1.76 (3) . ?  
O69 Cs1 3.32 (3) 2 ?  
O70 W18 1.68 (2) . ?  
O70 Cs1 3.32 (3) 2 ?  
O71 W17 1.71 (3) . ?  
O71 K1 3.37 (4) 1\_565 ?  
O72 W20 1.75 (3) . ?  
O72 Ho1 2.48 (3) . ?  
O72 Cs2 3.72 (3) . ?  
O73 W20 1.78 (3) . ?  
O73 Ho2 2.27 (3) . ?  
O74 Ho2 2.26 (3) . ?  
O75 Ho2 2.51 (4) . ?  
O76 Ho2 2.47 (3) . ?  
O76 Cs2 3.60 (3) . ?  
O77 W23 1.71 (3) . ?  
O77 Ho1 2.37 (3) . ?  
O78 W22 1.88 (3) . ?  
O78 W23 1.96 (3) . ?  
O78 Cs5 3.20 (3) . ?  
O79 W22 1.73 (3) . ?  
O79 Cs1 3.08 (3) . ?  
O80 W22 1.93 (2) . ?  
O80 W21 1.94 (2) . ?  
O81 W22 1.90 (3) . ?  
O81 W27 1.94 (3) . ?  
O82 W31 1.90 (3) . ?  
O82 W27 1.93 (2) . ?  
O83 W27 1.72 (3) . ?  
O84 W27 1.90 (2) . ?  
O84 W26 1.96 (3) . ?  
O85 W26 1.82 (2) . ?  
O85 W31 2.11 (2) . ?  
O86 W26 1.70 (3) . ?  
O86 K4 3.12 (3) 1\_545 ?  
O87 W26 1.94 (3) . ?  
O87 W25 1.98 (3) . ?  
O88 W25 1.80 (3) . ?  
O88 Ho3 2.35 (3) . ?  
O89 W25 1.78 (3) . ?  
O89 Na7 2.38 (3) . ?  
O90 W24 1.87 (2) . ?  
O90 W25 1.93 (3) . ?  
O91 W24 1.75 (2) . ?  
O91 Ho3 2.36 (3) . ?  
O91 Cs2 3.65 (3) . ?  
O92 W24 1.72 (3) . ?  
O93 W23 1.91 (3) . ?  
O93 W24 2.00 (3) . ?  
O93 Cs2 3.39 (3) . ?  
O94 W29 1.95 (2) . ?  
O94 W23 1.99 (2) . ?  
O94 Cs5 3.24 (2) . ?  
O95 W22 1.91 (3) . ?  
O95 W28 1.99 (3) . ?  
O95 Cs5 3.25 (3) . ?  
O96 W27 1.91 (3) . ?  
O96 W28 1.97 (3) . ?  
O97 W30 1.87 (3) . ?  
O97 W26 1.99 (2) . ?  
O98 W30 1.83 (3) . ?  
O98 W25 2.05 (2) . ?

O99 W29 1.83(2) . ?  
O99 W24 2.10(2) . ?  
O100 As3 1.80(2) . ?  
O100 W25 2.21(3) . ?  
O100 W30 2.41(2) . ?  
O100 W26 2.45(3) . ?  
O101 As3 1.85(2) . ?  
O101 W22 2.26(2) . ?  
O101 W27 2.27(3) . ?  
O101 W28 2.28(2) . ?  
O102 As3 1.80(3) . ?  
O102 W24 2.29(3) . ?  
O102 W23 2.31(3) . ?  
O102 W29 2.40(2) . ?  
O103 W28 1.79(3) . ?  
O103 W30 2.06(3) . ?  
O104 W28 1.80(3) . ?  
O104 W29 2.03(3) . ?  
O104 Cs5 3.44(3) . ?  
O105 W30 1.85(3) . ?  
O105 W29 1.97(3) . ?  
O106 W30 1.77(2) . ?  
O107 W28 1.74(3) . ?  
O108 W29 1.69(3) . ?  
O109 W21 1.90(3) . ?  
O109 W20 1.97(3) . ?  
O109 Na1 2.92(3) . ?  
O109 Cs2 3.21(3) . ?  
O110 W20 2.16(3) . ?  
O110 W21 2.19(3) . ?  
O110 Cs1 3.66(3) . ?  
O111 W21 1.77(2) . ?  
O111 Ho3 2.33(2) . ?  
O111 Cs2 3.76(3) . ?  
O112 Ho3 2.37(3) . ?  
O112 Cs3 3.52(3) . ?  
O113 W43 1.77(3) . ?  
O113 Ho3 2.45(3) . ?  
O113 Cs2 3.08(3) . ?  
O114 W31 1.74(3) . ?  
O114 Ho3 2.28(3) . ?  
O115 W41 1.78(2) . ?  
O115 Ho3 2.30(2) . ?  
O115 Cs3 3.34(3) . ?  
O116 Ho4 2.42(2) . ?  
O116 Na1 2.82(4) . ?  
O117 W31 1.79(2) . ?  
O117 Ho4 2.21(2) . ?  
O118 W41 1.75(3) . ?  
O118 Ho4 2.32(3) . ?  
O119 W33 1.86(3) . ?  
O119 W32 1.97(2) . ?  
O119 K4 3.04(3) 1\_545 ?  
O119 K1 3.22(3) . ?  
O120 W21 1.78(2) . ?  
O120 Ho4 2.37(3) . ?  
O121 Ho4 2.51(2) . ?  
O121 Cs1 3.20(3) . ?  
O122 Ho4 2.39(2) . ?  
O123 W36 1.81(3) . ?  
O123 Ho4 2.29(3) . ?  
O124 W37 1.76(3) . ?  
O124 Ho4 2.33(3) . ?  
O125 W32 1.78(3) . ?



O125 W31 2.11(3) . ?  
O126 W33 1.90(2) . ?  
O126 W31 1.91(2) . ?  
O127 W41 1.90(3) . ?  
O127 W34 1.95(3) . ?  
O127 Cs3 3.76(3) . ?  
O128 W35 1.77(3) . ?  
O128 W41 2.17(3) . ?  
O129 W35 1.69(2) . ?  
O129 Cs6 3.26(3) . ?  
O129 Cs4 3.27(2) 1\_455 ?  
O130 W35 1.88(3) . ?  
O130 W34 1.93(3) . ?  
O131 W34 1.68(3) . ?  
O131 Cs3 3.11(3) . ?  
O132 W34 1.89(2) . ?  
O132 W33 1.97(3) . ?  
O133 W33 1.71(2) . ?  
O133 K4 3.05(3) 1\_545 ?  
O134 W52 1.90(3) . ?  
O134 W53 1.91(3) . ?  
O135 W32 1.66(3) . ?  
O135 K4 3.27(3) 1\_545 ?  
O136 W32 1.87(2) . ?  
O136 W37 2.01(2) . ?  
O137 W37 1.67(3) . ?  
O138 W36 1.89(3) . ?  
O138 W37 1.94(2) . ?  
O139 W36 1.76(3) . ?  
O139 Na3 2.72(3) . ?  
O139 Na5 2.92(4) 1\_455 ?  
O139 Na4 2.97(4) 1\_455 ?  
O140 W35 1.94(2) . ?  
O140 W36 1.97(2) . ?  
O140 Cs4 3.26(2) 1\_455 ?  
O141 As4 1.84(2) . ?  
O141 W35 2.30(2) . ?  
O141 W36 2.32(2) . ?  
O141 W39 2.32(3) . ?  
O142 As4 1.79(3) . ?  
O142 W40 2.29(3) . ?  
O142 W33 2.29(2) . ?  
O142 W34 2.31(3) . ?  
O143 As4 1.83(3) . ?  
O143 W37 2.23(3) . ?  
O143 W32 2.39(2) . ?  
O143 W38 2.40(3) . ?  
O144 W38 1.91(3) . ?  
O144 W32 1.98(3) . ?  
O144 K1 3.15(3) . ?  
O145 W38 1.88(3) . ?  
O145 W37 2.05(3) . ?  
O146 W39 1.83(3) . ?  
O146 W36 2.01(3) . ?  
O146 Na4 2.98(3) 1\_455 ?  
O147 W39 1.89(3) . ?  
O147 W35 1.99(3) . ?  
O148 W34 1.85(3) . ?  
O148 W40 2.00(3) . ?  
O149 W33 1.86(3) . ?  
O149 W40 2.02(3) . ?  
O149 K1 3.38(3) . ?  
O150 W40 1.88(3) . ?  
O150 W38 1.98(3) . ?

O150 K1 3.17(3) . ?  
O151 W39 1.88(3) . ?  
O151 W38 1.94(3) . ?  
O152 W40 1.86(2) . ?  
O152 W39 1.98(3) . ?  
O153 W40 1.64(3) . ?  
O154 W39 1.70(3) . ?  
O155 W38 1.68(3) . ?  
O156 Ho3 2.48(3) . ?  
O156 Cs3 3.21(2) . ?  
O157 W23 1.71(2) . ?  
O157 W21 2.28(2) . ?  
O157 Cs2 3.15(2) . ?  
O158 W42 1.77(3) . ?  
O158 Ho2 2.37(3) . ?  
O159 W42 1.73(3) . ?  
O159 Ho5 2.40(3) . ?  
O160 W43 1.94(3) . ?  
O160 W42 1.94(3) . ?  
O160 Cs2 3.23(3) . ?  
O161 W43 1.73(2) . ?  
O161 Ho5 2.35(2) . ?  
O161 Cs3 3.64(3) . ?  
O162 W43 1.92(3) . ?  
O162 W44 1.98(3) . ?  
O162 Cs3 3.20(3) . ?  
O163 W44 1.81(3) . ?  
O163 W61 2.13(2) . ?  
O163 Cs3 3.09(3) . ?  
O164 W44 1.73(3) . ?  
O165 W45 1.86(3) . ?  
O165 W44 1.94(3) . ?  
O166 W45 1.90(3) . ?  
O166 W61 1.99(3) . ?  
O167 W45 1.74(3) . ?  
O167 K2 3.16(4) 2\_546 ?  
O168 W45 1.90(3) . ?  
O168 W46 1.98(3) . ?  
O169 W61 1.76(2) . ?  
O169 Ho6 2.34(2) . ?  
O169 K2 2.98(3) 2\_546 ?  
O170 W46 1.84(3) . ?  
O170 W47 1.93(3) . ?  
O171 W47 1.79(3) . ?  
O171 W51 2.11(3) . ?  
O172 W47 1.70(3) . ?  
O173 W47 1.91(2) . ?  
O173 W42 2.01(2) . ?  
O174 As5 1.82(3) . ?  
O174 W45 2.29(3) . ?  
O174 W50 2.30(3) . ?  
O174 W46 2.30(3) . ?  
O175 As5 1.83(3) . ?  
O175 W43 2.22(3) . ?  
O175 W49 2.36(3) . ?  
O175 W44 2.38(3) . ?  
O176 As5 1.82(3) . ?  
O176 W42 2.20(3) . ?  
O176 W48 2.44(3) . ?  
O176 W47 2.46(2) . ?  
O177 W48 1.94(2) . ?  
O177 W47 1.95(3) . ?  
O178 W48 1.95(3) . ?  
O178 W42 2.04(3) . ?

O179 W49 1.89(3) . ?  
O179 W43 2.04(3) . ?  
O179 Cs2 3.50(3) . ?  
O180 W49 1.87(3) . ?  
O180 W44 2.01(3) . ?  
O181 W45 1.92(3) . ?  
O181 W50 1.96(3) . ?  
O182 W46 1.84(3) . ?  
O182 W50 2.01(3) . ?  
O183 W50 1.82(3) . ?  
O183 W49 2.02(3) . ?  
O184 W48 1.90(3) . ?  
O184 W49 1.92(3) . ?  
O185 W50 1.82(3) . ?  
O185 W48 1.99(3) . ?  
O186 W50 1.68(4) . ?  
O187 W49 1.71(3) . ?  
O188 W48 1.69(4) . ?  
O189 Ho5 2.50(3) . ?  
O190 W61 1.77(2) . ?  
O190 Ho5 2.35(2) . ?  
O191 Ho5 2.43(3) . ?  
O192 W41 2.06(3) . ?  
O192 Ho5 2.36(3) . ?  
O192 Cs3 3.10(2) . ?  
O193 W51 1.74(2) . ?  
O193 Ho5 2.27(3) . ?  
O194 W41 1.98(2) . ?  
O194 Ho5 2.28(2) . ?  
O194 Na1 2.84(4) . ?  
O195 W51 1.75(3) . ?  
O195 Ho6 2.28(3) . ?  
O196 W46 1.90(3) . ?  
O196 W51 1.93(3) . ?  
O197 W51 1.88(2) . ?  
O197 W53 1.95(2) . ?  
O198 W52 1.81(3) . ?  
O198 W51 2.13(3) . ?  
O199 W52 1.66(3) . ?  
O199 Na13 2.89(4) 1\_565 ?  
O200 W52 1.89(3) . ?  
O200 W57 1.97(4) . ?  
O201 W57 1.80(3) . ?  
O201 Ho6 2.29(3) . ?  
O202 W57 1.65(4) . ?  
O203 W56 1.86(3) . ?  
O203 W57 1.93(3) . ?  
O204 W56 1.81(3) . ?  
O204 Ho6 2.29(3) . ?  
O205 W56 1.68(4) . ?  
O206 W55 1.90(4) . ?  
O206 W56 1.99(4) . ?  
O207 W55 1.71(4) . ?  
O207 Cs4 3.25(4) 1\_455 ?  
O208 W55 1.77(3) . ?  
O208 Cs6 3.27(3) . ?  
O209 W54 1.83(3) . ?  
O209 W55 1.97(3) . ?  
O209 Cs4 3.44(3) 1\_455 ?  
O210 W54 1.67(3) . ?  
O210 Na10 2.62(4) . ?  
O210 Na5 2.96(4) 1\_455 ?  
O210 K3 3.15(3) 1\_455 ?  
O210 Cs4 3.18(3) 1\_455 ?

O211 W54 1.80 (3) . ?  
O212 W54 1.91 (3) . ?  
O212 W53 1.95 (3) . ?  
O213 W53 1.71 (3) . ?  
O214 As6 1.80 (3) . ?  
O214 W54 2.30 (3) . ?  
O214 W53 2.31 (3) . ?  
O214 W59 2.32 (2) . ?  
O215 As6 1.84 (3) . ?  
O215 W57 2.22 (3) . ?  
O215 W58 2.34 (3) . ?  
O215 W52 2.43 (4) . ?  
O216 As6 1.81 (3) . ?  
O216 W56 2.30 (3) . ?  
O216 W55 2.32 (3) . ?  
O216 W60 2.34 (3) . ?  
O217 W60 1.81 (3) . ?  
O217 W55 2.05 (2) . ?  
O218 W59 1.91 (3) . ?  
O218 W54 2.08 (3) . ?  
O218 K3 2.70 (3) 1\_455 ?  
O219 W53 1.83 (3) . ?  
O219 W59 2.03 (3) . ?  
O220 W58 1.88 (4) . ?  
O220 W52 2.01 (3) . ?  
O221 W58 1.82 (3) . ?  
O221 W57 2.05 (3) . ?  
O222 W60 1.85 (4) . ?  
O222 W56 2.02 (3) . ?  
O223 W60 1.87 (3) . ?  
O223 W58 1.95 (3) . ?  
O224 W59 1.92 (3) . ?  
O224 W58 1.93 (3) . ?  
O225 W59 1.85 (3) . ?  
O225 W60 1.97 (3) . ?  
O226 W59 1.77 (3) . ?  
O226 Na9 2.32 (4) . ?  
O227 W58 1.68 (3) . ?  
O228 W60 1.75 (3) . ?  
O228 Na6 2.88 (3) 1\_465 ?  
O229 Ho6 2.40 (3) . ?  
O229 Cs6 3.17 (3) . ?  
O230 Ho6 2.43 (4) . ?  
O231 W64 1.71 (3) . ?  
O231 Ho6 2.41 (3) . ?  
O232 Ho6 2.44 (3) . ?  
O232 K2 2.95 (3) 2\_546 ?  
O233 W63 1.93 (3) . ?  
O233 W62 1.96 (3) . ?  
O234 W64 1.74 (3) . ?  
O234 W62 2.23 (3) . ?  
O234 K2 2.83 (3) 2\_546 ?  
O235 W64 1.92 (3) . ?  
O235 W65 1.95 (3) . ?  
O235 K2 3.05 (3) 2\_546 ?  
O236 W65 1.80 (3) . ?  
O236 Ho7 2.33 (3) . ?  
O236 K2 3.26 (3) 2\_546 ?  
O237 W65 1.77 (3) . ?  
O237 Ho7 2.31 (3) 2\_546 ?  
O238 W66 1.93 (3) . ?  
O238 W65 1.94 (3) . ?  
O239 W66 1.79 (3) . ?  
O239 Ho7 2.30 (3) . ?

O240 W66 1.74 (3) . ?  
O240 K2 2.59 (3) . ?  
O241 W67 1.86 (3) . ?  
O241 W66 1.94 (3) . ?  
O242 W67 1.81 (3) . ?  
O242 W72 2.05 (3) . ?  
O243 W67 1.69 (3) . ?  
O244 W68 1.92 (4) . ?  
O244 W67 1.96 (4) . ?  
O245 W72 1.89 (3) . ?  
O245 W68 1.91 (3) . ?  
O246 W68 1.65 (4) . ?  
O247 W68 1.94 (3) . ?  
O247 W63 1.95 (3) . ?  
O248 W63 1.75 (3) . ?  
O248 Cs6 3.28 (2) . ?  
O249 W71 1.91 (3) . ?  
O249 W64 2.04 (3) . ?  
O250 W71 1.84 (3) . ?  
O250 W65 2.08 (3) . ?  
O251 W70 1.88 (3) . ?  
O251 W66 2.05 (3) . ?  
O252 W70 1.83 (3) . ?  
O252 W67 2.01 (3) . ?  
O253 W68 1.91 (3) . ?  
O253 W69 1.99 (3) . ?  
O254 W63 1.93 (3) . ?  
O254 W69 1.94 (3) . ?  
O255 W69 1.78 (3) . ?  
O255 W71 2.04 (4) . ?  
O256 W71 1.85 (3) . ?  
O256 W70 1.94 (3) . ?  
O257 W69 1.84 (3) . ?  
O257 W70 2.00 (3) . ?  
O258 W70 1.62 (4) . ?  
O259 W71 1.68 (3) . ?  
O260 W69 1.64 (3) . ?  
O261 W72 1.76 (3) . ?  
O261 Ho7 2.23 (3) . ?  
O262 W62 1.76 (3) . ?  
O262 Ho7 2.35 (3) . ?  
O263 Ho7 2.46 (3) . ?  
O263 K2 2.84 (3) 2\_546 ?  
O264 Ho7 2.50 (3) . ?  
O265 W82 1.82 (3) . ?  
O265 Ho7 2.34 (3) . ?  
O266 W82 1.96 (6) . ?  
O267 W82 2.43 (8) . ?  
O268 W77 1.81 (3) . ?  
O268 W82 1.93 (3) . ?  
O269 W77 1.72 (3) . ?  
O270 W77 1.89 (3) . ?  
O270 W76 1.95 (3) . ?  
O271 W76 1.80 (3) . ?  
O271 W82 2.20 (3) . ?  
O272 W82 1.87 (3) . ?  
O272 Ho8 2.25 (3) . ?  
O273 W76 1.72 (4) . ?  
O274 W75 1.92 (3) . ?  
O274 W76 1.94 (2) . ?  
O275 W75 1.76 (3) . ?  
O275 Ho8 2.34 (3) . ?  
O276 W75 1.72 (3) . ?  
O276 Na7 2.44 (4) . ?

O277 W75 1.87(3) . ?  
O277 W74 2.03(3) . ?  
O278 W74 1.75(3) . ?  
O278 Ho8 2.35(3) . ?  
O279 W74 1.78(3) . ?  
O280 W73 1.92(3) . ?  
O280 W74 1.94(3) . ?  
O281 W73 1.82(3) . ?  
O281 W72 2.06(3) . ?  
O282 W73 1.67(4) . ?  
O282 Na13 2.66(4) . ?  
O283 W78 1.90(4) . ?  
O283 W73 1.92(3) . ?  
O284 W78 1.90(3) . ?  
O284 W72 1.95(3) . ?  
O285 W78 1.68(3) . ?  
O286 W78 1.91(4) . ?  
O286 W77 1.96(4) . ?  
O287 As8 1.83(3) . ?  
O287 W79 2.24(3) . ?  
O287 W78 2.31(3) . ?  
O287 W77 2.33(3) . ?  
O288 As8 1.79(3) . ?  
O288 W75 2.30(3) . ?  
O288 W81 2.36(2) . ?  
O288 W76 2.37(3) . ?  
O289 As8 1.76(3) . ?  
O289 W74 2.36(3) . ?  
O289 W80 2.38(3) . ?  
O289 W73 2.39(3) . ?  
O290 W80 1.89(3) . ?  
O290 W74 2.02(3) . ?  
O291 W73 1.94(3) . ?  
O291 W80 1.97(3) . ?  
O292 W78 1.86(3) . ?  
O292 W79 2.03(3) . ?  
O293 W79 1.85(3) . ?  
O293 W77 2.00(3) . ?  
O294 W81 1.82(3) . ?  
O294 W75 2.11(2) . ?  
O295 W81 1.84(3) . ?  
O295 W76 2.04(2) . ?  
O296 W80 1.91(3) . ?  
O296 W81 1.91(3) . ?  
O297 W79 1.87(3) . ?  
O297 W81 1.94(3) . ?  
O298 W79 1.86(3) . ?  
O298 W80 1.98(3) . ?  
O299 W79 1.70(3) . ?  
O300 W81 1.70(3) . ?  
O300 Na9 2.45(4) 1\_645 ?  
O301 W80 1.62(3) . ?  
O302 W72 1.72(3) . ?  
O302 Ho8 2.28(3) . ?  
O303 Ho8 2.40(3) . ?  
O304 Ho8 2.35(3) . ?  
O304 Cs3 3.21(3) . ?  
O305 Ho8 2.39(3) . ?  
O305 Cs3 3.40(3) . ?  
O306 W62 1.74(3) . ?  
O306 Ho8 2.45(3) . ?  
O306 Cs3 3.31(3) . ?  
O307 W61 1.84(3) . ?  
O307 W62 2.16(2) . ?

O307 Cs3 3.23(2) . ?  
O308 W62 1.94(3) . ?  
O308 W61 2.13(2) . ?  
O308 K2 2.79(3) 2\_546 ?  
O309 W64 1.86(3) . ?  
O309 W63 1.96(3) . ?  
O309 Cs6 3.61(3) . ?  
O319 Cs4 3.36(6) 1\_455 ?  
O320 Na3 2.92(4) . ?  
O321 Na3 2.96(3) . ?  
O322 Na11 3.02(8) . ?  
O324 Cs1 3.308(3) 2 ?  
O324 Cs1 3.308(3) . ?  
O326 Cs1 3.47(5) . ?  
O334 Na6 2.16(6) . ?  
O335 Na13 2.81(4) . ?  
O339 Na6 2.53(7) . ?  
O345 Na9 2.47(6) 1\_645 ?  
O346 Na10 2.31(4) . ?  
O346 Na3 2.99(4) . ?  
O347 Na9 2.45(4) 1\_645 ?  
O348 Na9 2.30(7) 1\_645 ?  
O349 Na7 2.39(5) . ?  
O350 Na7 2.32(6) . ?  
O351 Na7 2.41(5) . ?  
O354 K4 2.46(3) . ?  
O358 K3 2.77(4) . ?  
O359 Cs2 3.63(5) . ?  
O360 Cs6 2.60(6) . ?  
O361 As7 1.84(2) . ?  
O361 W65 2.25(3) . ?  
O361 W64 2.35(3) . ?  
O361 W71 2.36(2) . ?  
O362 As7 1.71(3) . ?  
O362 W66 2.28(3) . ?  
O362 W70 2.44(3) . ?  
O362 W67 2.52(2) . ?  
O363 As7 1.80(3) . ?  
O363 W69 2.27(3) . ?  
O363 W63 2.34(3) . ?  
O363 W68 2.35(3) . ?  
O366 Na4 2.96(5) . ?  
O368 Cs6 3.03(3) . ?  
O369 Na11 2.51(5) . ?  
O373 W46 1.71(3) . ?  
O373 Na13 3.01(4) 1\_565 ?  
O375 Na9 2.46(5) 1\_645 ?  
O376 Na10 2.28(5) . ?  
O377 Na10 2.51(3) . ?  
O378 Cs2 3.67(4) . ?  
O379 Na14 2.22(4) . ?  
O379 Na8 2.95(4) . ?  
O385 Na4 2.21(7) . ?  
O385 Cs4 3.12(7) . ?  
O386 Cs6 3.16(8) . ?  
O387 K1 2.79(6) . ?  
O389 Cs5 3.14(4) . ?  
Na1 Cs2 4.96(2) . ?  
Na2 Na2 2.41(4) 2\_645 ?  
Na3 Na11 2.68(3) . ?  
Na3 O14 2.99(3) 1\_455 ?  
Na3 Na5 3.97(3) 1\_455 ?  
Na4 O139 2.97(4) 1\_655 ?  
Na4 O146 2.98(3) 1\_655 ?

Na4 Cs4 4.97(3) . ?  
Na5 Na10 2.07(4) 1\_655 ?  
Na5 O139 2.92(4) 1\_655 ?  
Na5 O210 2.96(4) 1\_655 ?  
Na5 Cs4 2.98(3) . ?  
Na5 Na3 3.97(3) 1\_655 ?  
Na5 K3 4.62(3) . ?  
Na6 O228 2.88(3) 1\_645 ?  
Na7 Na8 2.43(3) . ?  
Na9 O348 2.30(7) 1\_465 ?  
Na9 O300 2.45(4) 1\_465 ?  
Na9 O347 2.45(4) 1\_465 ?  
Na9 O375 2.46(5) 1\_465 ?  
Na9 O345 2.47(6) 1\_465 ?  
Na9 K3 4.47(3) 1\_455 ?  
Na10 Na5 2.07(4) 1\_455 ?  
Na10 O2 2.69(4) 1\_455 ?  
Na10 Cs4 4.39(3) 1\_455 ?  
Na10 K3 4.48(2) 1\_455 ?  
Na11 O60 2.97(4) 2 ?  
Na12 Cs6 3.29(2) . ?  
Na13 O199 2.89(4) 1\_545 ?  
Na13 O373 3.01(4) 1\_545 ?  
Na14 O50 2.99(4) 1\_545 ?  
K1 K4 3.06(2) 1\_545 ?  
K1 O62 3.15(3) 1\_545 ?  
K1 O71 3.37(4) 1\_545 ?  
K1 W17 4.088(12) 1\_545 ?  
K1 W38 4.120(13) . ?  
K2 O308 2.79(3) 2\_546 ?  
K2 O234 2.83(3) 2\_546 ?  
K2 O263 2.84(3) 2\_546 ?  
K2 O232 2.95(3) 2\_546 ?  
K2 O169 2.98(3) 2\_546 ?  
K2 O235 3.05(3) 2\_546 ?  
K2 O167 3.16(4) 2\_546 ?  
K2 O236 3.26(3) 2\_546 ?  
K2 W64 3.722(13) 2\_546 ?  
K2 W61 3.730(12) 2\_546 ?  
K2 W62 3.883(11) 2\_546 ?  
K3 O218 2.70(3) 1\_655 ?  
K3 O210 3.15(3) 1\_655 ?  
K3 W5 3.774(12) . ?  
K3 W3 3.858(12) . ?  
K3 W54 3.883(11) 1\_655 ?  
K3 W2 3.923(12) . ?  
K3 W4 4.024(12) . ?  
K4 O119 3.04(3) 1\_565 ?  
K4 O133 3.05(3) 1\_565 ?  
K4 K1 3.06(2) 1\_565 ?  
K4 O86 3.12(3) 1\_565 ?  
K4 O135 3.27(3) 1\_565 ?  
K4 W33 3.812(15) 1\_565 ?  
K4 W17 3.846(15) . ?  
K4 W11 3.907(11) . ?  
Cs1 O66 3.20(3) 2 ?  
Cs1 O70 3.32(3) 2 ?  
Cs1 O69 3.32(3) 2 ?  
Cs1 W18 4.051(4) 2 ?  
Cs4 O210 3.18(3) 1\_655 ?  
Cs4 O207 3.25(4) 1\_655 ?  
Cs4 O140 3.26(2) 1\_655 ?  
Cs4 O129 3.27(2) 1\_655 ?  
Cs4 O319 3.36(6) 1\_655 ?



Cs4 O209 3.44(3) 1\_655 ?  
Cs4 W54 3.939(6) 1\_655 ?  
Cs4 W35 4.031(4) 1\_655 ?  
Cs4 W55 4.051(5) 1\_655 ?  
Cs5 O13 3.30(3) 2\_655 ?  
Cs5 O18 3.38(3) 2\_655 ?  
Cs5 O19 3.40(4) 2\_655 ?  
Cs5 W1 4.152(6) 2\_655 ?  
Cs5 W23 4.163(6) . ?  
Cs5 W22 4.166(6) . ?  
Cs6 W63 4.264(8) . ?  
Cs6 Cs4 5.105(10) 1\_455 ?  
Ho5 W41 3.576(3) . ?  
Ho6 K2 4.052(11) 2\_546 ?  
Ho7 O237 2.31(3) 2\_546 ?  
Ho7 K2 4.406(11) 2\_546 ?  
W1 Cs5 4.152(6) 2\_655 ?  
W7 Cs5 4.343(6) 2\_655 ?  
W8 Cs5 4.288(6) 2\_655 ?  
W17 K1 4.088(12) 1\_565 ?  
W18 Cs1 4.051(4) 2 ?  
W19 Cs1 4.136(4) 2 ?  
W32 K4 3.950(13) 1\_545 ?  
W33 K4 3.812(15) 1\_545 ?  
W35 Cs4 4.031(4) 1\_455 ?  
W54 K3 3.883(11) 1\_455 ?  
W54 Cs4 3.939(6) 1\_455 ?  
W55 Cs4 4.051(5) 1\_455 ?  
W61 K2 3.730(12) 2\_546 ?  
W62 K2 3.883(11) 2\_546 ?  
W64 K2 3.722(13) 2\_546 ?  
W65 K2 4.029(13) 2\_546 ?

loop\_

\_geom\_angle\_atom\_site\_label\_1  
\_geom\_angle\_atom\_site\_label\_2  
\_geom\_angle\_atom\_site\_label\_3  
\_geom\_angle  
\_geom\_angle\_site\_symmetry\_1  
\_geom\_angle\_site\_symmetry\_3  
\_geom\_angle\_publ\_flag  
W2 O2 Na10 121.7(16) . 1\_655 ?  
W5 O5 Cs4 142.3(14) . . ?  
W6 O6 Na4 104.2(13) . . ?  
W1 O10 W2 155.7(16) . . ?  
W3 O11 W2 149.3(15) . . ?  
W3 O11 K3 103.2(10) . . ?  
W2 O11 K3 102.8(10) . . ?  
W3 O12 W1 145.9(15) . . ?  
W1 O13 W7 118.0(14) . . ?  
W1 O13 Cs5 103.0(11) . 2\_655 ?  
W7 O13 Cs5 105.6(10) . 2\_655 ?  
W2 O14 W6 120.3(13) . . ?  
W2 O14 Na3 127.9(14) . 1\_655 ?  
W6 O14 Na3 110.3(11) . 1\_655 ?  
W2 O15 W5 121.4(15) . . ?  
W2 O15 K3 111.4(13) . . ?  
W5 O15 K3 100.5(11) . . ?  
W2 O15 Na5 105.2(12) . . ?  
W5 O15 Na5 108.9(13) . . ?  
K3 O15 Na5 108.9(11) . . ?  
W3 O16 W4 122.1(16) . . ?  
W3 O16 K3 100.6(11) . . ?  
W4 O16 K3 99.1(11) . . ?

W9 O17 W3 121.0(16) . . ?  
W1 O18 W8 121.3(17) . . ?  
W1 O18 Cs5 102.1(11) . 2\_655 ?  
W8 O18 Cs5 100.5(11) . 2\_655 ?  
W8 O19 W7 118.6(17) . . ?  
W8 O19 Cs5 103.4(14) . 2\_655 ?  
W7 O19 Cs5 104.7(12) . 2\_655 ?  
W7 O20 W6 142.1(17) . . ?  
W5 O21 W6 120.9(14) . . ?  
W5 O21 Na4 139.2(15) . . ?  
W6 O21 Na4 98.1(12) . . ?  
W5 O22 W4 144.5(17) . . ?  
W5 O22 K3 104.2(11) . . ?  
W4 O22 K3 111.1(12) . . ?  
W9 O23 W4 122.8(12) . . ?  
W8 O24 W9 148.5(18) . . ?  
As1 O25 W3 135.1(13) . . ?  
As1 O25 W9 116.3(12) . . ?  
W3 O25 W9 93.9(9) . . ?  
As1 O25 W4 112.4(13) . . ?  
W3 O25 W4 97.0(10) . . ?  
W9 O25 W4 93.6(8) . . ?  
As1 O26 W6 118.1(14) . . ?  
As1 O26 W5 118.7(13) . . ?  
W6 O26 W5 91.8(9) . . ?  
As1 O26 W2 133.9(15) . . ?  
W6 O26 W2 92.7(9) . . ?  
W5 O26 W2 91.5(9) . . ?  
As1 O27 W7 115.3(15) . . ?  
As1 O27 W1 133.1(15) . . ?  
W7 O27 W1 96.2(11) . . ?  
As1 O27 W8 120.0(13) . . ?  
W7 O27 W8 92.1(10) . . ?  
W1 O27 W8 90.8(10) . . ?  
W7 O28 Ho1 160.7(16) . . ?  
W6 O29 Ho1 155.9(15) . . ?  
W10 O32 W9 150.9(16) . . ?  
W8 O33 W10 153.4(17) . . ?  
W10 O34 Ho1 167.2(16) . . ?  
W10 O35 Ho2 175.8(16) . . ?  
Ho1 O37 Cs2 129.1(11) . . ?  
Ho1 O38 Cs5 131.6(12) . . ?  
W11 O39 W10 154.2(18) . . ?  
W12 O40 W10 152.4(17) . . ?  
W12 O41 W11 147.1(15) . . ?  
W11 O42 W16 119.6(18) . . ?  
W11 O42 K4 93.6(13) . . ?  
W16 O42 K4 112.3(13) . . ?  
W15 O43 W16 145.8(14) . . ?  
W14 O44 W15 119.5(15) . . ?  
W13 O45 W14 146.9(14) . . ?  
W13 O45 Cs1 97.8(8) . . ?  
W14 O45 Cs1 99.3(9) . . ?  
W12 O46 W13 119.3(12) . . ?  
As2 O47 W18 135.2(13) . . ?  
As2 O47 W13 113.8(13) . . ?  
W18 O47 W13 95.6(10) . . ?  
As2 O47 W12 114.1(14) . . ?  
W18 O47 W12 95.4(10) . . ?  
W13 O47 W12 94.6(9) . . ?  
As2 O48 W16 115.9(15) . . ?  
As2 O48 W17 132.9(17) . . ?  
W16 O48 W17 93.6(10) . . ?  
As2 O48 W11 121.1(14) . . ?

W16 O48 W11 92.5(12) . . ?  
W17 O48 W11 91.1(11) . . ?  
As2 O49 W15 115.3(13) . . ?  
As2 O49 W19 135.2(14) . . ?  
W15 O49 W19 93.7(9) . . ?  
As2 O49 W14 119.9(12) . . ?  
W15 O49 W14 91.1(10) . . ?  
W19 O49 W14 91.1(10) . . ?  
W11 O50 Na14 143.1(16) . 1\_565 ?  
W16 O52 Ho2 158.5(17) . . ?  
W15 O53 Ho2 157.7(16) . . ?  
W14 O55 W20 151.7(15) . . ?  
W14 O56 Cs1 110.2(13) . . ?  
W20 O57 W13 153.2(16) . . ?  
W13 O58 Cs1 110.8(12) . . ?  
W12 O60 W18 121.8(15) . . ?  
W12 O60 Na11 114.6(12) . 2 ?  
W18 O60 Na11 119.6(13) . 2 ?  
W17 O61 W11 121.3(15) . . ?  
W17 O61 K4 102.3(11) . . ?  
W11 O61 K4 102.0(12) . . ?  
W17 O62 W16 120.4(14) . . ?  
W17 O62 K1 106.5(12) . 1\_565 ?  
W16 O62 K1 132.0(13) . 1\_565 ?  
W17 O62 K4 91.3(12) . . ?  
W16 O62 K4 110.3(13) . . ?  
K1 O62 K4 56.3(7) 1\_565 . ?  
W19 O63 W15 118.0(14) . . ?  
W19 O64 W14 116.6(15) . . ?  
W13 O65 W18 119.8(13) . . ?  
W18 O66 W19 147.4(17) . . ?  
W18 O66 Cs1 104.4(11) . 2 ?  
W19 O66 Cs1 101.8(10) . 2 ?  
W19 O67 W17 158.7(16) . . ?  
W18 O68 W17 144.8(16) . . ?  
W19 O69 Cs1 104.9(11) . 2 ?  
W18 O70 Cs1 103.4(11) . 2 ?  
W17 O71 K1 102.2(15) . 1\_565 ?  
W20 O72 Ho1 161.0(15) . . ?  
W20 O72 Cs2 92.5(10) . . ?  
Ho1 O72 Cs2 105.0(8) . . ?  
W20 O73 Ho2 172.1(15) . . ?  
Ho2 O76 Cs2 117.5(12) . . ?  
W23 O77 Ho1 161.6(14) . . ?  
W22 O78 W23 147.1(16) . . ?  
W22 O78 Cs5 107.2(11) . . ?  
W23 O78 Cs5 105.1(11) . . ?  
W22 O79 Cs1 131.1(15) . . ?  
W22 O80 W21 148.1(15) . . ?  
W22 O81 W27 120.9(13) . . ?  
W31 O82 W27 153.1(15) . . ?  
W27 O84 W26 142.6(14) . . ?  
W26 O85 W31 149.2(14) . . ?  
W26 O86 K4 135.9(12) . 1\_545 ?  
W26 O87 W25 120.3(16) . . ?  
W25 O88 Ho3 159.6(19) . . ?  
W25 O89 Na7 147.7(16) . . ?  
W24 O90 W25 145.9(13) . . ?  
W24 O91 Ho3 158.9(14) . . ?  
W24 O91 Cs2 104.2(11) . . ?  
Ho3 O91 Cs2 96.5(7) . . ?  
W23 O93 W24 117.6(15) . . ?  
W23 O93 Cs2 97.6(9) . . ?  
W24 O93 Cs2 107.2(10) . . ?

W29 O94 W23 118.6(12) . . ?  
W29 O94 Cs5 112.3(9) . . ?  
W23 O94 Cs5 102.8(8) . . ?  
W22 O95 W28 118.2(14) . . ?  
W22 O95 Cs5 104.7(11) . . ?  
W28 O95 Cs5 106.5(10) . . ?  
W27 O96 W28 120.6(15) . . ?  
W30 O97 W26 124.6(13) . . ?  
W30 O98 W25 121.4(12) . . ?  
W29 O99 W24 119.9(12) . . ?  
As3 O100 W25 117.6(13) . . ?  
As3 O100 W30 131.9(14) . . ?  
W25 O100 W30 94.4(9) . . ?  
As3 O100 W26 121.0(12) . . ?  
W25 O100 W26 93.3(10) . . ?  
W30 O100 W26 89.1(8) . . ?  
As3 O101 W22 114.0(11) . . ?  
As3 O101 W27 116.5(12) . . ?  
W22 O101 W27 95.0(9) . . ?  
As3 O101 W28 132.8(12) . . ?  
W22 O101 W28 95.1(9) . . ?  
W27 O101 W28 95.5(9) . . ?  
As3 O102 W24 114.9(12) . . ?  
As3 O102 W23 122.5(11) . . ?  
W24 O102 W23 93.7(10) . . ?  
As3 O102 W29 131.5(12) . . ?  
W24 O102 W29 93.1(9) . . ?  
W23 O102 W29 92.0(9) . . ?  
W28 O103 W30 147.8(16) . . ?  
W28 O104 W29 150.8(17) . . ?  
W28 O104 Cs5 104.6(11) . . ?  
W29 O104 Cs5 103.1(11) . . ?  
W30 O105 W29 158.3(15) . . ?  
W21 O109 W20 117.0(13) . . ?  
W21 O109 Na1 109.1(12) . . ?  
W20 O109 Na1 111.1(10) . . ?  
W21 O109 Cs2 105.9(9) . . ?  
W20 O109 Cs2 105.2(10) . . ?  
Na1 O109 Cs2 108.0(9) . . ?  
W20 O110 W21 98.8(10) . . ?  
W20 O110 Cs1 128.9(9) . . ?  
W21 O110 Cs1 112.9(10) . . ?  
W21 O111 Ho3 169.4(12) . . ?  
W21 O111 Cs2 89.9(9) . . ?  
Ho3 O111 Cs2 94.0(7) . . ?  
Ho3 O112 Cs3 93.7(7) . . ?  
W43 O113 Ho3 146.8(15) . . ?  
W43 O113 Cs2 102.6(12) . . ?  
Ho3 O113 Cs2 110.5(9) . . ?  
W31 O114 Ho3 174.2(15) . . ?  
W41 O115 Ho3 154.3(14) . . ?  
W41 O115 Cs3 100.5(10) . . ?  
Ho3 O115 Cs3 100.0(8) . . ?  
Ho4 O116 Na1 118.7(10) . . ?  
W31 O117 Ho4 170.2(16) . . ?  
W41 O118 Ho4 173.0(14) . . ?  
W33 O119 W32 146.6(15) . . ?  
W33 O119 K4 99.3(9) . 1\_545 ?  
W32 O119 K4 102.0(10) . 1\_545 ?  
W33 O119 K1 109.2(11) . . ?  
W32 O119 K1 103.9(10) . . ?  
K4 O119 K1 58.6(6) 1\_545 . ?  
W21 O120 Ho4 155.3(13) . . ?  
Ho4 O121 Cs1 120.5(9) . . ?

W36 O123 Ho4 159.3 (15) . . ?  
W37 O124 Ho4 160.4 (14) . . ?  
W32 O125 W31 154.4 (15) . . ?  
W33 O126 W31 153.5 (13) . . ?  
W41 O127 W34 154.6 (14) . . ?  
W41 O127 Cs3 85.2 (9) . . ?  
W34 O127 Cs3 88.9 (8) . . ?  
W35 O128 W41 151.7 (14) . . ?  
W35 O129 Cs6 131.7 (12) . . ?  
W35 O129 Cs4 104.1 (11) . 1\_455 ?  
Cs6 O129 Cs4 102.8 (7) . 1\_455 ?  
W35 O130 W34 150.5 (17) . . ?  
W34 O131 Cs3 119.3 (13) . . ?  
W34 O132 W33 121.1 (14) . . ?  
W33 O133 K4 102.8 (12) . 1\_545 ?  
W52 O134 W53 149.7 (17) . . ?  
W32 O135 K4 101.4 (13) . 1\_545 ?  
W32 O136 W37 122.7 (13) . . ?  
W36 O138 W37 143.5 (15) . . ?  
W36 O139 Na3 134.3 (14) . . ?  
W36 O139 Na5 108.9 (13) . 1\_455 ?  
Na3 O139 Na5 89.3 (10) . 1\_455 ?  
W36 O139 Na4 105.2 (13) . 1\_455 ?  
Na3 O139 Na4 114.8 (11) . 1\_455 ?  
Na5 O139 Na4 94.9 (10) 1\_455 1\_455 ?  
W35 O140 W36 118.1 (11) . . ?  
W35 O140 Cs4 98.6 (8) . 1\_455 ?  
W36 O140 Cs4 137.2 (10) . 1\_455 ?  
As4 O141 W35 121.2 (13) . . ?  
As4 O141 W36 111.2 (12) . . ?  
W35 O141 W36 92.8 (9) . . ?  
As4 O141 W39 134.0 (13) . . ?  
W35 O141 W39 94.6 (9) . . ?  
W36 O141 W39 93.2 (9) . . ?  
As4 O142 W40 134.8 (13) . . ?  
As4 O142 W33 116.2 (12) . . ?  
W40 O142 W33 94.2 (9) . . ?  
As4 O142 W34 115.2 (13) . . ?  
W40 O142 W34 93.9 (9) . . ?  
W33 O142 W34 93.7 (9) . . ?  
As4 O143 W37 115.1 (13) . . ?  
As4 O143 W32 124.1 (13) . . ?  
W37 O143 W32 94.5 (10) . . ?  
As4 O143 W38 129.4 (13) . . ?  
W37 O143 W38 93.9 (10) . . ?  
W32 O143 W38 91.3 (9) . . ?  
W38 O144 W32 123.5 (17) . . ?  
W38 O144 K1 106.4 (13) . . ?  
W32 O144 K1 105.8 (11) . . ?  
W38 O145 W37 118.8 (14) . . ?  
W39 O146 W36 122.9 (14) . . ?  
W39 O146 Na4 138.5 (15) . 1\_455 ?  
W36 O146 Na4 98.5 (11) . 1\_455 ?  
W39 O147 W35 122.1 (13) . . ?  
W34 O148 W40 121.8 (14) . . ?  
W33 O149 W40 120.0 (15) . . ?  
W33 O149 K1 103.4 (12) . . ?  
W40 O149 K1 99.2 (12) . . ?  
W40 O150 W38 146.4 (15) . . ?  
W40 O150 K1 109.8 (11) . . ?  
W38 O150 K1 103.7 (11) . . ?  
W39 O151 W38 158.5 (17) . . ?  
W40 O152 W39 148.0 (16) . . ?  
Ho3 O156 Cs3 99.7 (8) . . ?

W23 O157 W21 149.8 (14) . . ?  
W23 O157 Cs2 111.7 (11) . . ?  
W21 O157 Cs2 98.4 (8) . . ?  
W42 O158 Ho2 146.6 (15) . . ?  
W42 O159 Ho5 157.8 (13) . . ?  
W43 O160 W42 139.9 (17) . . ?  
W43 O160 Cs2 93.9 (9) . . ?  
W42 O160 Cs2 123.1 (13) . . ?  
W43 O161 Ho5 163.0 (15) . . ?  
W43 O161 Cs3 97.7 (9) . . ?  
Ho5 O161 Cs3 99.3 (9) . . ?  
W43 O162 W44 118.4 (13) . . ?  
W43 O162 Cs3 108.8 (11) . . ?  
W44 O162 Cs3 98.7 (10) . . ?  
W44 O163 W61 151.8 (15) . . ?  
W44 O163 Cs3 106.8 (10) . . ?  
W61 O163 Cs3 101.2 (10) . . ?  
W45 O165 W44 147.5 (18) . . ?  
W45 O166 W61 151.7 (12) . . ?  
W45 O167 K2 113.3 (14) . 2\_546 ?  
W45 O168 W46 119.5 (16) . . ?  
W61 O169 Ho6 157.3 (14) . . ?  
W61 O169 K2 100.5 (10) . 2\_546 ?  
Ho6 O169 K2 98.4 (8) . 2\_546 ?  
W46 O170 W47 151 (2) . . ?  
W47 O171 W51 154.6 (16) . . ?  
W47 O173 W42 123.6 (12) . . ?  
As5 O174 W45 115.5 (15) . . ?  
As5 O174 W50 134.8 (15) . . ?  
W45 O174 W50 94.3 (10) . . ?  
As5 O174 W46 115.3 (12) . . ?  
W45 O174 W46 93.9 (10) . . ?  
W50 O174 W46 94.3 (11) . . ?  
As5 O175 W43 116.3 (14) . . ?  
As5 O175 W49 133.8 (16) . . ?  
W43 O175 W49 95.4 (10) . . ?  
As5 O175 W44 116.8 (14) . . ?  
W43 O175 W44 93.6 (10) . . ?  
W49 O175 W44 92.2 (9) . . ?  
As5 O176 W42 117.0 (13) . . ?  
As5 O176 W48 129.7 (12) . . ?  
W42 O176 W48 94.2 (9) . . ?  
As5 O176 W47 122.7 (12) . . ?  
W42 O176 W47 95.7 (9) . . ?  
W48 O176 W47 89.1 (9) . . ?  
W48 O177 W47 124.0 (15) . . ?  
W48 O178 W42 117.0 (14) . . ?  
W49 O179 W43 119.2 (14) . . ?  
W49 O179 Cs2 142.9 (14) . . ?  
W43 O179 Cs2 84.5 (9) . . ?  
W49 O180 W44 122.9 (13) . . ?  
W45 O181 W50 120.2 (15) . . ?  
W46 O182 W50 121.9 (16) . . ?  
W50 O183 W49 149.8 (16) . . ?  
W48 O184 W49 158.3 (17) . . ?  
W50 O185 W48 151.6 (16) . . ?  
W61 O190 Ho5 169.9 (13) . . ?  
W41 O192 Ho5 107.7 (11) . . ?  
W41 O192 Cs3 101.9 (8) . . ?  
Ho5 O192 Cs3 115.6 (10) . . ?  
W51 O193 Ho5 169.7 (16) . . ?  
W41 O194 Ho5 114.1 (11) . . ?  
W41 O194 Na1 124.6 (11) . . ?  
Ho5 O194 Na1 118.1 (11) . . ?

W51 O195 Ho6 169.2(15) . . ?  
W46 O196 W51 153.3(16) . . ?  
W51 O197 W53 153.0(15) . . ?  
W52 O198 W51 147.8(16) . . ?  
W52 O199 Na13 140.5(15) . 1\_565 ?  
W52 O200 W57 123.0(18) . . ?  
W57 O201 Ho6 156.4(18) . . ?  
W56 O203 W57 147.1(17) . . ?  
W56 O204 Ho6 158.5(17) . . ?  
W55 O206 W56 119.7(19) . . ?  
W55 O207 Cs4 105.5(16) . 1\_455 ?  
W55 O208 Cs6 129.5(15) . . ?  
W54 O209 W55 147.2(18) . . ?  
W54 O209 Cs4 91.4(11) . 1\_455 ?  
W55 O209 Cs4 92.8(11) . 1\_455 ?  
W54 O210 Na10 139.7(18) . . ?  
W54 O210 Na5 156.3(16) . 1\_455 ?  
Na10 O210 Na5 43.1(9) . 1\_455 ?  
W54 O210 K3 102.9(12) . 1\_455 ?  
Na10 O210 K3 101.5(11) . 1\_455 ?  
Na5 O210 K3 98.0(10) 1\_455 1\_455 ?  
W54 O210 Cs4 104.1(14) . 1\_455 ?  
Na10 O210 Cs4 97.9(11) . 1\_455 ?  
Na5 O210 Cs4 58.0(8) 1\_455 1\_455 ?  
K3 O210 Cs4 108.6(10) 1\_455 1\_455 ?  
W54 O212 W53 121.7(15) . . ?  
As6 O214 W54 116.8(13) . . ?  
As6 O214 W53 115.6(13) . . ?  
W54 O214 W53 93.7(10) . . ?  
As6 O214 W59 133.9(14) . . ?  
W54 O214 W59 95.0(10) . . ?  
W53 O214 W59 93.2(10) . . ?  
As6 O215 W57 118.3(16) . . ?  
As6 O215 W58 130.4(17) . . ?  
W57 O215 W58 96.0(12) . . ?  
As6 O215 W52 118.7(15) . . ?  
W57 O215 W52 93.8(12) . . ?  
W58 O215 W52 91.0(12) . . ?  
As6 O216 W56 114.7(13) . . ?  
As6 O216 W55 117.7(13) . . ?  
W56 O216 W55 93.2(11) . . ?  
As6 O216 W60 133.9(15) . . ?  
W56 O216 W60 93.8(10) . . ?  
W55 O216 W60 94.4(10) . . ?  
W60 O217 W55 124.4(15) . . ?  
W59 O218 W54 117.2(14) . . ?  
W59 O218 K3 134.4(12) . 1\_455 ?  
W54 O218 K3 107.9(11) . 1\_455 ?  
W53 O219 W59 121.1(17) . . ?  
W58 O220 W52 122.3(18) . . ?  
W58 O221 W57 122.5(17) . . ?  
W60 O222 W56 121.9(18) . . ?  
W60 O223 W58 156.8(17) . . ?  
W59 O224 W58 148.5(17) . . ?  
W59 O225 W60 153.1(18) . . ?  
W59 O226 Na9 157.5(19) . . ?  
W60 O228 Na6 168.7(17) . 1\_465 ?  
Ho6 O229 Cs6 132.0(12) . . ?  
W64 O231 Ho6 149.2(17) . . ?  
Ho6 O232 K2 97.2(11) . 2\_546 ?  
W63 O233 W62 156.2(14) . . ?  
W64 O234 W62 154.0(17) . . ?  
W64 O234 K2 106.5(12) . 2\_546 ?  
W62 O234 K2 99.5(11) . 2\_546 ?

W64 O235 W65 120.7(13) . . ?  
W64 O235 K2 94.3(10) . 2\_546 ?  
W65 O235 K2 105.4(10) . 2\_546 ?  
W65 O236 Ho7 155.7(17) . . ?  
W65 O236 K2 101.5(11) . 2\_546 ?  
Ho7 O236 K2 102.7(11) . 2\_546 ?  
W65 O237 Ho7 156.6(14) . 2\_546 ?  
W66 O238 W65 141.4(19) . . ?  
W66 O239 Ho7 160.7(14) . . ?  
W66 O240 K2 142.1(17) . . ?  
W67 O241 W66 126.4(14) . . ?  
W67 O242 W72 156.4(18) . . ?  
W68 O244 W67 141(2) . . ?  
W72 O245 W68 156.2(16) . . ?  
W68 O247 W63 120.8(15) . . ?  
W63 O248 Cs6 112.3(11) . . ?  
W71 O249 W64 118.9(13) . . ?  
W71 O250 W65 119.9(13) . . ?  
W70 O251 W66 118.8(13) . . ?  
W70 O252 W67 126.1(18) . . ?  
W68 O253 W69 119.8(17) . . ?  
W63 O254 W69 121.8(15) . . ?  
W69 O255 W71 150.7(19) . . ?  
W71 O256 W70 161.5(17) . . ?  
W69 O257 W70 146.9(19) . . ?  
W72 O261 Ho7 172.8(18) . . ?  
W62 O262 Ho7 172.6(17) . . ?  
Ho7 O263 K2 112.4(10) . 2\_546 ?  
W82 O265 Ho7 152.5(16) . . ?  
W77 O268 W82 153.8(19) . . ?  
W77 O270 W76 145.1(16) . . ?  
W76 O271 W82 147.2(18) . . ?  
W82 O272 Ho8 161.8(18) . . ?  
W75 O274 W76 121.7(13) . . ?  
W75 O275 Ho8 161.8(18) . . ?  
W75 O276 Na7 144.8(19) . . ?  
W75 O277 W74 137.3(15) . . ?  
W74 O278 Ho8 160.0(17) . . ?  
W73 O280 W74 123.2(16) . . ?  
W73 O281 W72 152.5(17) . . ?  
W73 O282 Na13 154.2(18) . . ?  
W78 O283 W73 147.9(19) . . ?  
W78 O284 W72 151.7(18) . . ?  
W78 O286 W77 121.6(18) . . ?  
As8 O287 W79 136.5(15) . . ?  
As8 O287 W78 115.1(14) . . ?  
W79 O287 W78 95.1(11) . . ?  
As8 O287 W77 111.9(14) . . ?  
W79 O287 W77 95.8(11) . . ?  
W78 O287 W77 93.3(10) . . ?  
As8 O288 W75 114.9(13) . . ?  
As8 O288 W81 133.8(14) . . ?  
W75 O288 W81 93.3(9) . . ?  
As8 O288 W76 120.6(13) . . ?  
W75 O288 W76 92.4(10) . . ?  
W81 O288 W76 92.1(9) . . ?  
As8 O289 W74 113.0(14) . . ?  
As8 O289 W80 133.7(15) . . ?  
W74 O289 W80 91.4(10) . . ?  
As8 O289 W73 125.2(14) . . ?  
W74 O289 W73 91.0(10) . . ?  
W80 O289 W73 91.2(10) . . ?  
W80 O290 W74 120.5(14) . . ?  
W73 O291 W80 121.9(17) . . ?



W78 O292 W79 119.9(16) . . ?  
W79 O293 W77 123.5(16) . . ?  
W81 O294 W75 119.0(13) . . ?  
W81 O295 W76 123.0(14) . . ?  
W80 O296 W81 156.7(16) . . ?  
W79 O297 W81 152.6(16) . . ?  
W79 O298 W80 149.1(18) . . ?  
W81 O300 Na9 137.4(16) . 1\_645 ?  
W72 O302 Ho8 170.5(19) . . ?  
Ho8 O304 Cs3 97.3(10) . . ?  
Ho8 O305 Cs3 91.9(9) . . ?  
W62 O306 Ho8 151.6(17) . . ?  
W62 O306 Cs3 112.5(12) . . ?  
Ho8 O306 Cs3 93.0(9) . . ?  
W61 O307 W62 108.1(11) . . ?  
W61 O307 Cs3 103.8(10) . . ?  
W62 O307 Cs3 103.5(7) . . ?  
W62 O308 W61 105.6(11) . . ?  
W62 O308 K2 109.0(11) . 2\_546 ?  
W61 O308 K2 97.8(8) . 2\_546 ?  
W64 O309 W63 146.5(17) . . ?  
W64 O309 Cs6 108.8(11) . . ?  
W63 O309 Cs6 95.2(11) . . ?  
Cs1 O324 Cs1 180.00(14) 2 . ?  
Na10 O346 Na3 110.0(16) . . ?  
As7 O361 W65 115.2(12) . . ?  
As7 O361 W64 118.2(12) . . ?  
W65 O361 W64 94.0(10) . . ?  
As7 O361 W71 133.3(14) . . ?  
W65 O361 W71 94.9(9) . . ?  
W64 O361 W71 92.7(8) . . ?  
As7 O362 W66 117.8(15) . . ?  
As7 O362 W70 135.0(13) . . ?  
W66 O362 W70 91.6(9) . . ?  
As7 O362 W67 123.4(12) . . ?  
W66 O362 W67 89.7(9) . . ?  
W70 O362 W67 87.2(9) . . ?  
As7 O363 W69 137.7(14) . . ?  
As7 O363 W63 115.4(14) . . ?  
W69 O363 W63 94.4(10) . . ?  
As7 O363 W68 113.2(12) . . ?  
W69 O363 W68 93.5(11) . . ?  
W63 O363 W68 92.3(10) . . ?  
W46 O373 Na13 105.9(15) . 1\_565 ?  
Na14 O379 Na8 146.1(16) . . ?  
Na4 O385 Cs4 137(3) . . ?  
O116 Na1 O194 78.7(10) . . ?  
O116 Na1 O109 103.9(10) . . ?  
O194 Na1 O109 117.3(10) . . ?  
O116 Na1 Cs2 135.0(8) . . ?  
O194 Na1 Cs2 98.0(7) . . ?  
O109 Na1 Cs2 38.0(6) . . ?  
Na11 Na3 O139 74.7(9) . . ?  
Na11 Na3 O320 105.1(10) . . ?  
O139 Na3 O320 155.8(11) . . ?  
Na11 Na3 O321 69.4(9) . . ?  
O139 Na3 O321 125.7(11) . . ?  
O320 Na3 O321 74.5(10) . . ?  
Na11 Na3 O14 116.8(10) . 1\_455 ?  
O139 Na3 O14 91.3(9) . 1\_455 ?  
O320 Na3 O14 109.5(10) . 1\_455 ?  
O321 Na3 O14 71.2(8) . 1\_455 ?  
Na11 Na3 O346 153.5(10) . . ?  
O139 Na3 O346 93.5(11) . . ?

O320 Na3 O346 76.0(11) . . ?  
O321 Na3 O346 134.0(11) . . ?  
O14 Na3 O346 86.6(10) 1\_455 . ?  
Na11 Na3 Na5 120.6(9) . 1\_455 ?  
O139 Na3 Na5 47.3(7) . 1\_455 ?  
O320 Na3 Na5 132.7(10) . 1\_455 ?  
O321 Na3 Na5 131.0(8) . 1\_455 ?  
O14 Na3 Na5 61.7(7) 1\_455 1\_455 ?  
O346 Na3 Na5 57.7(9) . 1\_455 ?  
O385 Na4 O6 133(2) . . ?  
O385 Na4 O21 77(2) . . ?  
O6 Na4 O21 56.8(9) . . ?  
O385 Na4 O366 74(2) . . ?  
O6 Na4 O366 93.9(12) . . ?  
O21 Na4 O366 65.2(11) . . ?  
O385 Na4 O139 92(2) . 1\_655 ?  
O6 Na4 O139 76.5(10) . 1\_655 ?  
O21 Na4 O139 86.7(10) . 1\_655 ?  
O366 Na4 O139 150.6(13) . 1\_655 ?  
O385 Na4 O146 71.6(19) . 1\_655 ?  
O6 Na4 O146 130.2(12) . 1\_655 ?  
O21 Na4 O146 130.3(12) . 1\_655 ?  
O366 Na4 O146 135.6(13) . 1\_655 ?  
O139 Na4 O146 57.5(9) 1\_655 1\_655 ?  
O385 Na4 Cs4 25(2) . . ?  
O6 Na4 Cs4 116.0(9) . . ?  
O21 Na4 Cs4 69.1(7) . . ?  
O366 Na4 Cs4 92.2(10) . . ?  
O139 Na4 Cs4 68.4(7) 1\_655 . ?  
O146 Na4 Cs4 66.2(7) 1\_655 . ?  
Na10 Na5 O15 90.1(12) 1\_655 . ?  
Na10 Na5 O139 119.0(13) 1\_655 1\_655 ?  
O15 Na5 O139 118.4(12) . 1\_655 ?  
Na10 Na5 O210 59.7(11) 1\_655 1\_655 ?  
O15 Na5 O210 77.8(10) . 1\_655 ?  
O139 Na5 O210 163.7(12) 1\_655 1\_655 ?  
Na10 Na5 Cs4 119.5(12) 1\_655 . ?  
O15 Na5 Cs4 100.4(9) . . ?  
O139 Na5 Cs4 107.4(10) 1\_655 . ?  
O210 Na5 Cs4 64.8(8) 1\_655 . ?  
Na10 Na5 Na3 86.5(11) 1\_655 1\_655 ?  
O15 Na5 Na3 93.1(9) . 1\_655 ?  
O139 Na5 Na3 43.3(7) 1\_655 1\_655 ?  
O210 Na5 Na3 144.6(11) 1\_655 1\_655 ?  
Cs4 Na5 Na3 150.3(9) . 1\_655 ?  
Na10 Na5 K3 73.3(9) 1\_655 . ?  
O15 Na5 K3 35.2(7) . . ?  
O139 Na5 K3 153.5(9) 1\_655 . ?  
O210 Na5 K3 42.6(6) 1\_655 . ?  
Cs4 Na5 K3 82.3(5) . . ?  
Na3 Na5 K3 121.6(6) 1\_655 . ?  
O334 Na6 O339 120(2) . . ?  
O334 Na6 O228 78.7(16) . 1\_645 ?  
O339 Na6 O228 155.5(18) . 1\_645 ?  
O350 Na7 O89 85.8(17) . . ?  
O350 Na7 O349 103.9(19) . . ?  
O89 Na7 O349 165.1(17) . . ?  
O350 Na7 O351 102.3(19) . . ?  
O89 Na7 O351 81.1(14) . . ?  
O349 Na7 O351 85.7(17) . . ?  
O350 Na7 Na8 165.6(17) . . ?  
O89 Na7 Na8 86.0(11) . . ?  
O349 Na7 Na8 86.7(15) . . ?  
O351 Na7 Na8 88.1(15) . . ?

O350 Na7 O276 82.3(17) . . ?  
O89 Na7 O276 92.9(12) . . ?  
O349 Na7 O276 99.5(16) . . ?  
O351 Na7 O276 172.0(16) . . ?  
Na8 Na7 O276 86.2(12) . . ?  
Na7 Na8 O379 98.0(11) . . ?  
O348 Na9 O226 93(2) 1\_465 . ?  
O348 Na9 O300 177(2) 1\_465 1\_465 ?  
O226 Na9 O300 84.9(13) . 1\_465 ?  
O348 Na9 O347 94(2) 1\_465 1\_465 ?  
O226 Na9 O347 171.9(17) . 1\_465 ?  
O300 Na9 O347 87.9(13) 1\_465 1\_465 ?  
O348 Na9 O375 98(2) 1\_465 1\_465 ?  
O226 Na9 O375 98.1(16) . 1\_465 ?  
O300 Na9 O375 79.4(14) 1\_465 1\_465 ?  
O347 Na9 O375 84.2(15) 1\_465 1\_465 ?  
O348 Na9 O345 94(2) 1\_465 1\_465 ?  
O226 Na9 O345 84.7(18) . 1\_465 ?  
O300 Na9 O345 88.6(17) 1\_465 1\_465 ?  
O347 Na9 O345 91.4(18) 1\_465 1\_465 ?  
O375 Na9 O345 167.3(18) 1\_465 1\_465 ?  
O348 Na9 K3 50(2) 1\_465 1\_455 ?  
O226 Na9 K3 67.1(10) . 1\_455 ?  
O300 Na9 K3 127.1(12) 1\_465 1\_455 ?  
O347 Na9 K3 120.6(12) 1\_465 1\_455 ?  
O375 Na9 K3 62.6(10) 1\_465 1\_455 ?  
O345 Na9 K3 129.3(14) 1\_465 1\_455 ?  
Na5 Na10 O376 152.1(17) 1\_455 . ?  
Na5 Na10 O346 104.4(16) 1\_455 . ?  
O376 Na10 O346 101.2(18) . . ?  
Na5 Na10 O377 82.2(12) 1\_455 . ?  
O376 Na10 O377 110.6(15) . . ?  
O346 Na10 O377 86.3(13) . . ?  
Na5 Na10 O210 77.2(13) 1\_455 . ?  
O376 Na10 O210 76.9(14) . . ?  
O346 Na10 O210 177.1(15) . . ?  
O377 Na10 O210 96.3(12) . . ?  
Na5 Na10 O2 93.5(13) 1\_455 1\_455 ?  
O376 Na10 O2 85.5(14) . 1\_455 ?  
O346 Na10 O2 68.6(12) . 1\_455 ?  
O377 Na10 O2 152.8(13) . 1\_455 ?  
O210 Na10 O2 109.0(11) . 1\_455 ?  
Na5 Na10 Cs4 36.3(8) 1\_455 1\_455 ?  
O376 Na10 Cs4 121.9(13) . 1\_455 ?  
O346 Na10 Cs4 136.4(13) . 1\_455 ?  
O377 Na10 Cs4 73.1(9) . 1\_455 ?  
O210 Na10 Cs4 45.9(8) . 1\_455 ?  
O2 Na10 Cs4 117.8(10) 1\_455 1\_455 ?  
Na5 Na10 K3 80.4(9) 1\_455 1\_455 ?  
O376 Na10 K3 73.8(11) . 1\_455 ?  
O346 Na10 K3 134.0(12) . 1\_455 ?  
O377 Na10 K3 139.0(11) . 1\_455 ?  
O210 Na10 K3 43.6(7) . 1\_455 ?  
O2 Na10 K3 65.4(7) 1\_455 1\_455 ?  
Cs4 Na10 K3 70.9(4) 1\_455 1\_455 ?  
O369 Na11 Na3 100.2(13) . . ?  
O369 Na11 O60 87.5(13) . 2 ?  
Na3 Na11 O60 112.8(11) . 2 ?  
O369 Na11 O322 44.1(16) . . ?  
Na3 Na11 O322 132.5(15) . . ?  
O60 Na11 O322 97.8(16) 2 . ?  
O282 Na13 O335 65.1(11) . . ?  
O282 Na13 O199 129.9(12) . 1\_545 ?  
O335 Na13 O199 65.6(11) . 1\_545 ?

O282 Na13 O373 156.5(13) . 1\_545 ?  
O335 Na13 O373 137.7(13) . 1\_545 ?  
O199 Na13 O373 73.6(11) 1\_545 1\_545 ?  
O379 Na14 O50 74.5(13) . 1\_545 ?  
O387 K1 K4 108.7(13) . 1\_545 ?  
O387 K1 O144 61.6(13) . . ?  
K4 K1 O144 90.5(8) 1\_545 . ?  
O387 K1 O62 100.3(13) . 1\_545 ?  
K4 K1 O62 64.7(7) 1\_545 1\_545 ?  
O144 K1 O62 144.0(10) . 1\_545 ?  
O387 K1 O150 95.7(13) . . ?  
K4 K1 O150 113.1(8) 1\_545 . ?  
O144 K1 O150 49.1(8) . . ?  
O62 K1 O150 163.6(10) 1\_545 . ?  
O387 K1 O119 106.7(14) . . ?  
K4 K1 O119 57.9(5) 1\_545 . ?  
O144 K1 O119 48.7(8) . . ?  
O62 K1 O119 121.6(9) 1\_545 . ?  
O150 K1 O119 55.6(7) . . ?  
O387 K1 O71 54.4(12) . 1\_545 ?  
K4 K1 O71 69.7(8) 1\_545 1\_545 ?  
O144 K1 O71 98.4(9) . 1\_545 ?  
O62 K1 O71 49.8(8) 1\_545 1\_545 ?  
O150 K1 O71 146.2(9) . 1\_545 ?  
O119 K1 O71 113.3(9) . 1\_545 ?  
O387 K1 O149 142.0(13) . . ?  
K4 K1 O149 81.7(7) 1\_545 . ?  
O144 K1 O149 82.4(8) . . ?  
O62 K1 O149 116.7(9) 1\_545 . ?  
O150 K1 O149 48.2(7) . . ?  
O119 K1 O149 47.1(7) . . ?  
O71 K1 O149 151.3(10) 1\_545 . ?  
O387 K1 W17 77.0(11) . 1\_545 ?  
K4 K1 W17 63.2(3) 1\_545 1\_545 ?  
O144 K1 W17 120.3(7) . 1\_545 ?  
O62 K1 W17 25.8(6) 1\_545 1\_545 ?  
O150 K1 W17 169.4(8) . 1\_545 ?  
O119 K1 W17 118.7(6) . 1\_545 ?  
O71 K1 W17 24.2(6) 1\_545 1\_545 ?  
O149 K1 W17 136.5(6) . 1\_545 ?  
O387 K1 W38 69.3(11) . . ?  
K4 K1 W38 112.8(5) 1\_545 . ?  
O144 K1 W38 26.4(5) . . ?  
O62 K1 W38 168.3(8) 1\_545 . ?  
O150 K1 W38 27.8(5) . . ?  
O119 K1 W38 59.4(5) . . ?  
O71 K1 W38 118.5(7) 1\_545 . ?  
O149 K1 W38 73.1(5) . . ?  
W17 K1 W38 142.6(4) 1\_545 . ?  
O240 K2 O308 134.6(10) . 2\_546 ?  
O240 K2 O234 161.2(11) . 2\_546 ?  
O308 K2 O234 59.2(8) 2\_546 2\_546 ?  
O240 K2 O263 77.9(9) . 2\_546 ?  
O308 K2 O263 74.9(8) 2\_546 2\_546 ?  
O234 K2 O263 97.6(8) 2\_546 2\_546 ?  
O240 K2 O232 82.2(10) . 2\_546 ?  
O308 K2 O232 102.1(9) 2\_546 2\_546 ?  
O234 K2 O232 109.1(9) 2\_546 2\_546 ?  
O263 K2 O232 147.0(10) 2\_546 2\_546 ?  
O240 K2 O169 134.3(10) . 2\_546 ?  
O308 K2 O169 60.2(7) 2\_546 2\_546 ?  
O234 K2 O169 60.8(8) 2\_546 2\_546 ?  
O263 K2 O169 135.1(8) 2\_546 2\_546 ?  
O232 K2 O169 52.9(8) 2\_546 2\_546 ?

O240 K2 O235 109.6(9) . 2\_546 ?  
O308 K2 O235 113.1(8) 2\_546 2\_546 ?  
O234 K2 O235 54.0(8) 2\_546 2\_546 ?  
O263 K2 O235 108.5(8) 2\_546 2\_546 ?  
O232 K2 O235 102.9(8) 2\_546 2\_546 ?  
O169 K2 O235 90.4(8) 2\_546 2\_546 ?  
O240 K2 O167 65.3(10) . 2\_546 ?  
O308 K2 O167 71.2(8) 2\_546 2\_546 ?  
O234 K2 O167 130.4(9) 2\_546 2\_546 ?  
O263 K2 O167 68.8(8) 2\_546 2\_546 ?  
O232 K2 O167 79.0(9) 2\_546 2\_546 ?  
O169 K2 O167 94.8(8) 2\_546 2\_546 ?  
O235 K2 O167 174.5(9) 2\_546 2\_546 ?  
O240 K2 O236 99.7(10) . 2\_546 ?  
O308 K2 O236 95.8(8) 2\_546 2\_546 ?  
O234 K2 O236 63.3(8) 2\_546 2\_546 ?  
O263 K2 O236 57.9(8) 2\_546 2\_546 ?  
O232 K2 O236 152.8(9) 2\_546 2\_546 ?  
O169 K2 O236 123.7(9) 2\_546 2\_546 ?  
O235 K2 O236 50.7(7) 2\_546 2\_546 ?  
O167 K2 O236 126.7(8) 2\_546 2\_546 ?  
O240 K2 W64 140.0(8) . 2\_546 ?  
O308 K2 W64 84.8(6) 2\_546 2\_546 ?  
O234 K2 W64 26.7(5) 2\_546 2\_546 ?  
O263 K2 W64 114.2(7) 2\_546 2\_546 ?  
O232 K2 W64 97.9(7) 2\_546 2\_546 ?  
O169 K2 W64 64.5(6) 2\_546 2\_546 ?  
O235 K2 W64 31.0(5) 2\_546 2\_546 ?  
O167 K2 W64 154.3(7) 2\_546 2\_546 ?  
O236 K2 W64 63.2(6) 2\_546 2\_546 ?  
O240 K2 W61 135.9(9) . 2\_546 ?  
O308 K2 W61 34.5(5) 2\_546 2\_546 ?  
O234 K2 W61 62.9(6) 2\_546 2\_546 ?  
O263 K2 W61 108.3(6) 2\_546 2\_546 ?  
O232 K2 W61 69.5(7) 2\_546 2\_546 ?  
O169 K2 W61 27.6(4) 2\_546 2\_546 ?  
O235 K2 W61 109.2(6) 2\_546 2\_546 ?  
O167 K2 W61 76.2(6) 2\_546 2\_546 ?  
O236 K2 W61 121.0(6) 2\_546 2\_546 ?  
W64 K2 W61 78.9(2) 2\_546 2\_546 ?  
O240 K2 W62 151.4(7) . 2\_546 ?  
O308 K2 W62 28.2(6) 2\_546 2\_546 ?  
O234 K2 W62 34.6(6) 2\_546 2\_546 ?  
O263 K2 W62 74.5(6) 2\_546 2\_546 ?  
O232 K2 W62 118.3(7) 2\_546 2\_546 ?  
O169 K2 W62 66.4(5) 2\_546 2\_546 ?  
O235 K2 W62 86.2(5) 2\_546 2\_546 ?  
O167 K2 W62 97.5(6) 2\_546 2\_546 ?  
O236 K2 W62 71.5(6) 2\_546 2\_546 ?  
W64 K2 W62 61.23(19) 2\_546 2\_546 ?  
W61 K2 W62 50.49(15) 2\_546 2\_546 ?  
O218 K3 O358 69.6(10) 1\_655 . ?  
O218 K3 O15 130.1(9) 1\_655 . ?  
O358 K3 O15 112.3(11) . . ?  
O218 K3 O22 147.9(10) 1\_655 . ?  
O358 K3 O22 79.4(10) . . ?  
O15 K3 O22 55.3(8) . . ?  
O218 K3 O11 145.8(10) 1\_655 . ?  
O358 K3 O11 144.4(10) . . ?  
O15 K3 O11 53.4(8) . . ?  
O22 K3 O11 65.8(8) . . ?  
O218 K3 O16 138.3(9) 1\_655 . ?  
O358 K3 O16 100.6(10) . . ?  
O15 K3 O16 91.4(9) . . ?

O22 K3 O16 54.6(8) . . ?  
O11 K3 O16 53.3(7) . . ?  
O218 K3 O210 54.9(8) 1\_655 1\_655 ?  
O358 K3 O210 88.5(9) . 1\_655 ?  
O15 K3 O210 75.2(8) . 1\_655 ?  
O22 K3 O210 117.8(9) . 1\_655 ?  
O11 K3 O210 113.8(8) . 1\_655 ?  
O16 K3 O210 166.1(9) . 1\_655 ?  
O218 K3 W5 135.7(7) 1\_655 . ?  
O358 K3 W5 84.7(8) . . ?  
O15 K3 W5 32.3(6) . . ?  
O22 K3 W5 28.4(5) . . ?  
O11 K3 W5 68.6(6) . . ?  
O16 K3 W5 80.1(6) . . ?  
O210 K3 W5 90.3(7) 1\_655 . ?  
O218 K3 W3 143.2(8) 1\_655 . ?  
O358 K3 W3 127.7(8) . . ?  
O15 K3 W3 77.6(6) . . ?  
O22 K3 W3 64.7(6) . . ?  
O11 K3 W3 28.3(4) . . ?  
O16 K3 W3 27.5(6) . . ?  
O210 K3 W3 141.1(7) 1\_655 . ?  
W5 K3 W3 80.9(2) . . ?  
O218 K3 W54 30.7(6) 1\_655 1\_655 ?  
O358 K3 W54 75.0(7) . 1\_655 ?  
O15 K3 W54 99.6(6) . 1\_655 ?  
O22 K3 W54 132.6(7) . 1\_655 ?  
O11 K3 W54 135.0(6) . 1\_655 ?  
O16 K3 W54 168.9(7) . 1\_655 ?  
O210 K3 W54 24.8(6) 1\_655 1\_655 ?  
W5 K3 W54 109.2(3) . 1\_655 ?  
W3 K3 W54 156.7(4) . 1\_655 ?  
O218 K3 W2 136.2(7) 1\_655 . ?  
O358 K3 W2 137.4(9) . . ?  
O15 K3 W2 26.6(6) . . ?  
O22 K3 W2 65.5(6) . . ?  
O11 K3 W2 29.6(5) . . ?  
O16 K3 W2 78.8(6) . . ?  
O210 K3 W2 87.3(6) 1\_655 . ?  
W5 K3 W2 53.04(16) . . ?  
W3 K3 W2 57.26(17) . . ?  
W54 K3 W2 111.4(3) 1\_655 . ?  
O218 K3 W4 143.1(7) 1\_655 . ?  
O358 K3 W4 78.7(8) . . ?  
O15 K3 W4 79.1(6) . . ?  
O22 K3 W4 27.3(5) . . ?  
O11 K3 W4 67.0(5) . . ?  
O16 K3 W4 31.6(6) . . ?  
O210 K3 W4 144.2(7) 1\_655 . ?  
W5 K3 W4 55.63(17) . . ?  
W3 K3 W4 51.95(15) . . ?  
W54 K3 W4 150.9(4) 1\_655 . ?  
W2 K3 W4 80.4(2) . . ?  
O354 K4 O61 61.8(9) . . ?  
O354 K4 O119 110.8(9) . 1\_565 ?  
O61 K4 O119 156.6(10) . 1\_565 ?  
O354 K4 O133 132.2(10) . 1\_565 ?  
O61 K4 O133 148.0(9) . 1\_565 ?  
O119 K4 O133 54.3(7) 1\_565 1\_565 ?  
O354 K4 K1 123.3(9) . 1\_565 ?  
O61 K4 K1 100.7(8) . 1\_565 ?  
O119 K4 K1 63.6(6) 1\_565 1\_565 ?  
O133 K4 K1 92.3(8) 1\_565 1\_565 ?  
O354 K4 O86 61.5(9) . 1\_565 ?

O61 K4 O86 96.9(9) . 1\_565 ?  
O119 K4 O86 98.0(8) 1\_565 1\_565 ?  
O133 K4 O86 75.3(8) 1\_565 1\_565 ?  
K1 K4 O86 161.6(7) 1\_565 1\_565 ?  
O354 K4 O135 60.3(8) . 1\_565 ?  
O61 K4 O135 109.1(10) . 1\_565 ?  
O119 K4 O135 53.5(7) 1\_565 1\_565 ?  
O133 K4 O135 101.8(8) 1\_565 1\_565 ?  
K1 K4 O135 80.4(7) 1\_565 1\_565 ?  
O86 K4 O135 88.8(9) 1\_565 1\_565 ?  
O354 K4 O42 104.5(9) . . ?  
O61 K4 O42 51.1(8) . . ?  
O119 K4 O42 144.4(10) 1\_565 . ?  
O133 K4 O42 97.9(9) 1\_565 . ?  
K1 K4 O42 100.6(9) 1\_565 . ?  
O86 K4 O42 94.7(9) 1\_565 . ?  
O135 K4 O42 160.2(10) 1\_565 . ?  
O354 K4 O62 108.4(9) . . ?  
O61 K4 O62 50.4(8) . . ?  
O119 K4 O62 121.6(9) 1\_565 . ?  
O133 K4 O62 117.6(10) 1\_565 . ?  
K1 K4 O62 59.0(6) 1\_565 . ?  
O86 K4 O62 138.9(8) 1\_565 . ?  
O135 K4 O62 122.3(9) 1\_565 . ?  
O42 K4 O62 47.0(8) . . ?  
O354 K4 W33 129.1(8) . 1\_565 ?  
O61 K4 W33 169.0(9) . 1\_565 ?  
O119 K4 W33 28.8(5) 1\_565 1\_565 ?  
O133 K4 W33 25.9(5) 1\_565 1\_565 ?  
K1 K4 W33 74.7(4) 1\_565 1\_565 ?  
O86 K4 W33 88.9(6) 1\_565 1\_565 ?  
O135 K4 W33 80.3(6) 1\_565 1\_565 ?  
O42 K4 W33 119.2(8) . 1\_565 ?  
O62 K4 W33 120.0(8) . 1\_565 ?  
O354 K4 W17 79.9(7) . . ?  
O61 K4 W17 29.1(6) . . ?  
O119 K4 W17 132.0(7) 1\_565 . ?  
O133 K4 W17 146.3(9) 1\_565 . ?  
K1 K4 W17 71.5(4) 1\_565 . ?  
O86 K4 W17 126.0(7) 1\_565 . ?  
O135 K4 W17 104.2(7) 1\_565 . ?  
O42 K4 W17 58.4(7) . . ?  
O62 K4 W17 28.8(5) . . ?  
W33 K4 W17 144.5(6) 1\_565 . ?  
O354 K4 W11 75.3(6) . . ?  
O61 K4 W11 30.4(6) . . ?  
O119 K4 W11 172.2(8) 1\_565 . ?  
O133 K4 W11 118.2(7) 1\_565 . ?  
K1 K4 W11 117.6(5) 1\_565 . ?  
O86 K4 W11 80.6(6) 1\_565 . ?  
O135 K4 W11 133.8(8) 1\_565 . ?  
O42 K4 W11 29.1(6) . . ?  
O62 K4 W11 58.7(5) . . ?  
W33 K4 W11 143.5(5) 1\_565 . ?  
W17 K4 W11 52.57(17) . . ?  
O26 As1 O27 98.6(13) . . ?  
O26 As1 O25 97.9(12) . . ?  
O27 As1 O25 96.6(13) . . ?  
O49 As2 O48 99.6(13) . . ?  
O49 As2 O47 95.9(13) . . ?  
O48 As2 O47 96.3(13) . . ?  
O100 As3 O102 101.3(11) . . ?  
O100 As3 O101 97.5(11) . . ?  
O102 As3 O101 98.0(11) . . ?

O142 As4 O143 96.7(12) . . ?  
O142 As4 O141 94.7(11) . . ?  
O143 As4 O141 103.6(11) . . ?  
O174 As5 O176 97.8(13) . . ?  
O174 As5 O175 97.3(12) . . ?  
O176 As5 O175 99.5(12) . . ?  
O214 As6 O216 96.3(13) . . ?  
O214 As6 O215 100.2(14) . . ?  
O216 As6 O215 99.2(14) . . ?  
O362 As7 O363 95.7(13) . . ?  
O362 As7 O361 99.1(12) . . ?  
O363 As7 O361 94.9(12) . . ?  
O289 As8 O288 102.5(13) . . ?  
O289 As8 O287 92.8(14) . . ?  
O288 As8 O287 96.0(12) . . ?  
O79 Cs1 O58 65.1(8) . . ?  
O79 Cs1 O121 80.7(7) . . ?  
O58 Cs1 O121 135.2(7) . . ?  
O79 Cs1 O66 130.0(7) . 2 ?  
O58 Cs1 O66 118.5(7) . 2 ?  
O121 Cs1 O66 105.5(7) . 2 ?  
O79 Cs1 O56 121.7(8) . . ?  
O58 Cs1 O56 97.9(8) . . ?  
O121 Cs1 O56 75.7(7) . . ?  
O66 Cs1 O56 107.5(7) 2 . ?  
O79 Cs1 O324 141.1(6) . . ?  
O58 Cs1 O324 77.0(5) . . ?  
O121 Cs1 O324 136.1(4) . . ?  
O66 Cs1 O324 62.0(5) 2 . ?  
O56 Cs1 O324 69.9(5) . . ?  
O79 Cs1 O70 134.1(7) . 2 ?  
O58 Cs1 O70 160.3(6) . 2 ?  
O121 Cs1 O70 62.0(6) . 2 ?  
O66 Cs1 O70 49.1(7) 2 2 ?  
O56 Cs1 O70 75.7(7) . 2 ?  
O324 Cs1 O70 83.4(4) . 2 ?  
O79 Cs1 O69 81.1(7) . 2 ?  
O58 Cs1 O69 83.3(8) . 2 ?  
O121 Cs1 O69 120.3(7) . 2 ?  
O66 Cs1 O69 52.5(7) 2 2 ?  
O56 Cs1 O69 155.5(7) . 2 ?  
O324 Cs1 O69 86.7(5) . 2 ?  
O70 Cs1 O69 95.0(7) 2 2 ?  
O79 Cs1 O45 103.9(7) . . ?  
O58 Cs1 O45 50.6(6) . . ?  
O121 Cs1 O45 118.4(6) . . ?  
O66 Cs1 O45 114.8(6) 2 . ?  
O56 Cs1 O45 49.3(7) . . ?  
O324 Cs1 O45 52.8(4) . . ?  
O70 Cs1 O45 116.5(6) 2 . ?  
O69 Cs1 O45 121.1(7) 2 . ?  
O79 Cs1 O326 67.9(10) . . ?  
O58 Cs1 O326 119.4(9) . . ?  
O121 Cs1 O326 67.2(9) . . ?  
O66 Cs1 O326 69.4(9) 2 . ?  
O56 Cs1 O326 139.6(10) . . ?  
O324 Cs1 O326 130.0(8) . . ?  
O70 Cs1 O326 73.3(9) 2 . ?  
O69 Cs1 O326 53.3(9) 2 . ?  
O45 Cs1 O326 169.9(9) . . ?  
O79 Cs1 O110 50.7(7) . . ?  
O58 Cs1 O110 60.3(7) . . ?  
O121 Cs1 O110 75.9(6) . . ?  
O66 Cs1 O110 178.5(6) 2 . ?



O56 Cs1 O110 72.0(6) . . ?  
O324 Cs1 O110 116.5(4) . . ?  
O70 Cs1 O110 131.8(6) 2 . ?  
O69 Cs1 O110 127.5(6) 2 . ?  
O45 Cs1 O110 63.8(5) . . ?  
O326 Cs1 O110 111.9(8) . . ?  
O79 Cs1 W18 140.5(6) . 2 ?  
O58 Cs1 W18 140.6(5) . 2 ?  
O121 Cs1 W18 84.1(5) . 2 ?  
O66 Cs1 W18 25.7(5) 2 2 ?  
O56 Cs1 W18 88.8(6) . 2 ?  
O324 Cs1 W18 69.04(6) . 2 ?  
O70 Cs1 W18 23.8(4) 2 2 ?  
O69 Cs1 W18 75.6(5) 2 2 ?  
O45 Cs1 W18 115.4(4) . 2 ?  
O326 Cs1 W18 72.5(8) . 2 ?  
O110 Cs1 W18 155.0(4) . 2 ?  
O37 Cs2 O113 176.0(6) . . ?  
O37 Cs2 O157 84.3(7) . . ?  
O113 Cs2 O157 94.8(7) . . ?  
O37 Cs2 O109 93.6(7) . . ?  
O113 Cs2 O109 89.0(7) . . ?  
O157 Cs2 O109 52.0(6) . . ?  
O37 Cs2 O160 129.8(7) . . ?  
O113 Cs2 O160 53.2(7) . . ?  
O157 Cs2 O160 133.9(7) . . ?  
O109 Cs2 O160 90.9(7) . . ?  
O37 Cs2 O93 76.8(7) . . ?  
O113 Cs2 O93 99.7(7) . . ?  
O157 Cs2 O93 46.6(6) . . ?  
O109 Cs2 O93 98.6(6) . . ?  
O160 Cs2 O93 151.4(7) . . ?  
O37 Cs2 O179 129.2(7) . . ?  
O113 Cs2 O179 50.1(7) . . ?  
O157 Cs2 O179 139.9(7) . . ?  
O109 Cs2 O179 130.6(7) . . ?  
O160 Cs2 O179 44.6(7) . . ?  
O93 Cs2 O179 112.9(6) . . ?  
O37 Cs2 O76 60.9(7) . . ?  
O113 Cs2 O76 122.5(7) . . ?  
O157 Cs2 O76 124.2(7) . . ?  
O109 Cs2 O76 86.0(7) . . ?  
O160 Cs2 O76 69.6(7) . . ?  
O93 Cs2 O76 137.7(7) . . ?  
O179 Cs2 O76 94.1(7) . . ?  
O37 Cs2 O359 80.1(10) . . ?  
O113 Cs2 O359 96.8(10) . . ?  
O157 Cs2 O359 117.6(9) . . ?  
O109 Cs2 O359 168.7(9) . . ?  
O160 Cs2 O359 100.3(10) . . ?  
O93 Cs2 O359 70.9(9) . . ?  
O179 Cs2 O359 59.6(10) . . ?  
O76 Cs2 O359 98.9(10) . . ?  
O37 Cs2 O91 122.6(6) . . ?  
O113 Cs2 O91 54.1(6) . . ?  
O157 Cs2 O91 57.1(6) . . ?  
O109 Cs2 O91 93.0(6) . . ?  
O160 Cs2 O91 107.0(7) . . ?  
O93 Cs2 O91 45.8(6) . . ?  
O179 Cs2 O91 83.9(6) . . ?  
O76 Cs2 O91 176.4(7) . . ?  
O359 Cs2 O91 82.7(9) . . ?  
O37 Cs2 O378 69.3(7) . . ?  
O113 Cs2 O378 110.4(7) . . ?

O157 Cs2 O378 149.8(7) . . ?  
O109 Cs2 O378 140.7(7) . . ?  
O160 Cs2 O378 76.0(8) . . ?  
O93 Cs2 O378 110.6(7) . . ?  
O179 Cs2 O378 60.5(8) . . ?  
O76 Cs2 O378 54.7(7) . . ?  
O359 Cs2 O378 45.3(10) . . ?  
O91 Cs2 O378 126.2(6) . . ?  
O37 Cs2 O72 45.2(7) . . ?  
O113 Cs2 O72 136.7(7) . . ?  
O157 Cs2 O72 53.5(6) . . ?  
O109 Cs2 O72 49.1(6) . . ?  
O160 Cs2 O72 125.2(6) . . ?  
O93 Cs2 O72 79.9(6) . . ?  
O179 Cs2 O72 165.7(6) . . ?  
O76 Cs2 O72 71.7(7) . . ?  
O359 Cs2 O72 122.8(10) . . ?  
O91 Cs2 O72 110.1(6) . . ?  
O378 Cs2 O72 110.0(7) . . ?  
O163 Cs3 O192 89.7(7) . . ?  
O163 Cs3 O131 130.5(7) . . ?  
O192 Cs3 O131 69.3(7) . . ?  
O163 Cs3 O162 50.4(7) . . ?  
O192 Cs3 O162 98.8(7) . . ?  
O131 Cs3 O162 167.5(7) . . ?  
O163 Cs3 O156 147.3(7) . . ?  
O192 Cs3 O156 92.1(6) . . ?  
O131 Cs3 O156 79.9(7) . . ?  
O162 Cs3 O156 97.2(7) . . ?  
O163 Cs3 O304 78.5(7) . . ?  
O192 Cs3 O304 167.2(8) . . ?  
O131 Cs3 O304 122.5(8) . . ?  
O162 Cs3 O304 69.8(8) . . ?  
O156 Cs3 O304 95.1(7) . . ?  
O163 Cs3 O307 53.8(7) . . ?  
O192 Cs3 O307 76.6(6) . . ?  
O131 Cs3 O307 77.4(7) . . ?  
O162 Cs3 O307 104.1(6) . . ?  
O156 Cs3 O307 157.1(7) . . ?  
O304 Cs3 O307 100.0(7) . . ?  
O163 Cs3 O306 69.2(7) . . ?  
O192 Cs3 O306 127.0(7) . . ?  
O131 Cs3 O306 88.2(8) . . ?  
O162 Cs3 O306 102.6(7) . . ?  
O156 Cs3 O306 131.6(7) . . ?  
O304 Cs3 O306 53.3(8) . . ?  
O307 Cs3 O306 51.4(6) . . ?  
O163 Cs3 O115 111.7(7) . . ?  
O192 Cs3 O115 52.2(6) . . ?  
O131 Cs3 O115 90.4(7) . . ?  
O162 Cs3 O115 78.8(7) . . ?  
O156 Cs3 O115 48.2(6) . . ?  
O304 Cs3 O115 127.8(7) . . ?  
O307 Cs3 O115 128.1(6) . . ?  
O306 Cs3 O115 178.6(7) . . ?  
O163 Cs3 O305 126.0(7) . . ?  
O192 Cs3 O305 143.4(8) . . ?  
O131 Cs3 O305 79.5(7) . . ?  
O162 Cs3 O305 110.3(7) . . ?  
O156 Cs3 O305 63.2(7) . . ?  
O304 Cs3 O305 49.3(8) . . ?  
O307 Cs3 O305 115.5(7) . . ?  
O306 Cs3 O305 68.6(7) . . ?  
O115 Cs3 O305 111.3(7) . . ?

0163 Cs3 O112 99.3(7) . . ?  
0192 Cs3 O112 112.8(6) . . ?  
0131 Cs3 O112 130.0(6) . . ?  
0162 Cs3 O112 50.0(6) . . ?  
0156 Cs3 O112 50.4(6) . . ?  
0304 Cs3 O112 64.9(7) . . ?  
0307 Cs3 O112 152.5(6) . . ?  
0306 Cs3 O112 118.2(6) . . ?  
0115 Cs3 O112 62.9(6) . . ?  
0305 Cs3 O112 73.4(7) . . ?  
0163 Cs3 O161 57.1(6) . . ?  
0192 Cs3 O161 52.6(7) . . ?  
0131 Cs3 O161 121.9(6) . . ?  
0162 Cs3 O161 46.2(6) . . ?  
0156 Cs3 O161 99.3(6) . . ?  
0304 Cs3 O161 115.5(7) . . ?  
0307 Cs3 O161 89.6(6) . . ?  
0306 Cs3 O161 126.1(7) . . ?  
0115 Cs3 O161 54.7(6) . . ?  
0305 Cs3 O161 151.2(7) . . ?  
0112 Cs3 O161 77.9(6) . . ?  
Na5 Cs4 O5 72.6(7) . . ?  
Na5 Cs4 O385 77.1(14) . . ?  
O5 Cs4 O385 60.6(13) . . ?  
Na5 Cs4 O210 57.2(7) . 1\_655 ?  
O5 Cs4 O210 81.9(8) . 1\_655 ?  
O385 Cs4 O210 128.2(14) . 1\_655 ?  
Na5 Cs4 O207 151.7(8) . 1\_655 ?  
O5 Cs4 O207 92.4(8) . 1\_655 ?  
O385 Cs4 O207 116.9(15) . 1\_655 ?  
O210 Cs4 O207 97.7(9) 1\_655 1\_655 ?  
Na5 Cs4 O140 59.8(6) . 1\_655 ?  
O5 Cs4 O140 118.7(7) . 1\_655 ?  
O385 Cs4 O140 72.4(13) . 1\_655 ?  
O210 Cs4 O140 100.4(7) 1\_655 1\_655 ?  
O207 Cs4 O140 145.8(7) 1\_655 1\_655 ?  
Na5 Cs4 O129 101.4(6) . 1\_655 ?  
O5 Cs4 O129 169.2(7) . 1\_655 ?  
O385 Cs4 O129 109.7(13) . 1\_655 ?  
O210 Cs4 O129 102.6(7) 1\_655 1\_655 ?  
O207 Cs4 O129 96.7(7) 1\_655 1\_655 ?  
O140 Cs4 O129 51.1(6) 1\_655 1\_655 ?  
Na5 Cs4 O319 135.9(11) . 1\_655 ?  
O5 Cs4 O319 109.5(11) . 1\_655 ?  
O385 Cs4 O319 67.7(16) . 1\_655 ?  
O210 Cs4 O319 164.1(11) 1\_655 1\_655 ?  
O207 Cs4 O319 71.4(11) 1\_655 1\_655 ?  
O140 Cs4 O319 84.1(10) 1\_655 1\_655 ?  
O129 Cs4 O319 68.3(10) 1\_655 1\_655 ?  
Na5 Cs4 O209 105.2(8) . 1\_655 ?  
O5 Cs4 O209 90.5(7) . 1\_655 ?  
O385 Cs4 O209 149.4(13) . 1\_655 ?  
O210 Cs4 O209 48.3(8) 1\_655 1\_655 ?  
O207 Cs4 O209 49.8(9) 1\_655 1\_655 ?  
O140 Cs4 O209 135.7(7) 1\_655 1\_655 ?  
O129 Cs4 O209 99.8(7) 1\_655 1\_655 ?  
O319 Cs4 O209 118.7(11) 1\_655 1\_655 ?  
Na5 Cs4 W54 80.6(5) . 1\_655 ?  
O5 Cs4 W54 95.2(6) . 1\_655 ?  
O385 Cs4 W54 151.0(13) . 1\_655 ?  
O210 Cs4 W54 24.3(6) 1\_655 1\_655 ?  
O207 Cs4 W54 76.9(7) 1\_655 1\_655 ?  
O140 Cs4 W54 111.4(5) 1\_655 1\_655 ?  
O129 Cs4 W54 92.6(5) 1\_655 1\_655 ?

O319 Cs4 W54 140.1(10) 1\_655 1\_655 ?  
O209 Cs4 W54 27.7(6) 1\_655 1\_655 ?  
Na5 Cs4 W35 85.4(4) . 1\_655 ?  
O5 Cs4 W35 145.2(6) . 1\_655 ?  
O385 Cs4 W35 88.7(12) . 1\_655 ?  
O210 Cs4 W35 108.8(5) 1\_655 1\_655 ?  
O207 Cs4 W35 117.7(6) 1\_655 1\_655 ?  
O140 Cs4 W35 28.3(4) 1\_655 1\_655 ?  
O129 Cs4 W35 24.1(4) 1\_655 1\_655 ?  
O319 Cs4 W35 68.5(9) 1\_655 1\_655 ?  
O209 Cs4 W35 121.8(5) 1\_655 1\_655 ?  
W54 Cs4 W35 107.81(12) 1\_655 1\_655 ?  
Na5 Cs4 W55 134.2(5) . 1\_655 ?  
O5 Cs4 W55 101.1(5) . 1\_655 ?  
O385 Cs4 W55 140.4(13) . 1\_655 ?  
O210 Cs4 W55 77.0(6) 1\_655 1\_655 ?  
O207 Cs4 W55 24.0(7) 1\_655 1\_655 ?  
O140 Cs4 W55 139.5(4) 1\_655 1\_655 ?  
O129 Cs4 W55 89.5(5) 1\_655 1\_655 ?  
O319 Cs4 W55 89.6(9) 1\_655 1\_655 ?  
O209 Cs4 W55 29.1(6) 1\_655 1\_655 ?  
W54 Cs4 W55 54.29(8) 1\_655 1\_655 ?  
W35 Cs4 W55 113.49(12) 1\_655 1\_655 ?  
O389 Cs5 O78 73.9(9) . . ?  
O389 Cs5 O94 110.4(8) . . ?  
O78 Cs5 O94 49.4(6) . . ?  
O389 Cs5 O95 88.5(9) . . ?  
O78 Cs5 O95 47.9(7) . . ?  
O94 Cs5 O95 81.3(7) . . ?  
O389 Cs5 O13 51.8(9) . 2\_655 ?  
O78 Cs5 O13 123.5(7) . 2\_655 ?  
O94 Cs5 O13 156.9(7) . 2\_655 ?  
O95 Cs5 O13 109.9(7) . 2\_655 ?  
O389 Cs5 O38 62.9(9) . . ?  
O78 Cs5 O38 84.6(7) . . ?  
O94 Cs5 O38 73.7(7) . . ?  
O95 Cs5 O38 130.9(7) . . ?  
O13 Cs5 O38 84.0(7) 2\_655 . ?  
O389 Cs5 O18 96.1(9) . 2\_655 ?  
O78 Cs5 O18 149.4(8) . 2\_655 ?  
O94 Cs5 O18 153.2(6) . 2\_655 ?  
O95 Cs5 O18 104.2(8) . 2\_655 ?  
O13 Cs5 O18 45.8(7) 2\_655 2\_655 ?  
O38 Cs5 O18 117.1(8) . 2\_655 ?  
O389 Cs5 O19 87.4(10) . 2\_655 ?  
O78 Cs5 O19 154.3(8) . 2\_655 ?  
O94 Cs5 O19 126.6(8) . 2\_655 ?  
O95 Cs5 O19 151.3(8) . 2\_655 ?  
O13 Cs5 O19 47.6(7) 2\_655 2\_655 ?  
O38 Cs5 O19 71.0(8) . 2\_655 ?  
O18 Cs5 O19 48.1(8) 2\_655 2\_655 ?  
O389 Cs5 O104 127.5(9) . . ?  
O78 Cs5 O104 56.2(6) . . ?  
O94 Cs5 O104 47.8(6) . . ?  
O95 Cs5 O104 47.0(7) . . ?  
O13 Cs5 O104 152.8(7) 2\_655 . ?  
O38 Cs5 O104 121.3(7) . . ?  
O18 Cs5 O104 118.0(7) 2\_655 . ?  
O19 Cs5 O104 145.1(7) 2\_655 . ?  
O389 Cs5 W1 71.9(7) . 2\_655 ?  
O78 Cs5 W1 130.5(5) . 2\_655 ?  
O94 Cs5 W1 176.7(5) . 2\_655 ?  
O95 Cs5 W1 96.5(5) . 2\_655 ?  
O13 Cs5 W1 26.4(5) 2\_655 2\_655 ?

O38 Cs5 W1 109.5(5) . 2\_655 ?  
O18 Cs5 W1 25.1(5) 2\_655 2\_655 ?  
O19 Cs5 W1 55.3(6) 2\_655 2\_655 ?  
O104 Cs5 W1 129.0(5) . 2\_655 ?  
O389 Cs5 W23 83.7(8) . . ?  
O78 Cs5 W23 27.0(5) . . ?  
O94 Cs5 W23 27.9(4) . . ?  
O95 Cs5 W23 71.9(5) . . ?  
O13 Cs5 W23 134.8(5) 2\_655 . ?  
O38 Cs5 W23 66.3(5) . . ?  
O18 Cs5 W23 176.1(6) 2\_655 . ?  
O19 Cs5 W23 135.6(6) 2\_655 . ?  
O104 Cs5 W23 59.7(4) . . ?  
W1 Cs5 W23 153.39(16) 2\_655 . ?  
O389 Cs5 W22 70.5(8) . . ?  
O78 Cs5 W22 25.6(5) . . ?  
O94 Cs5 W22 71.5(4) . . ?  
O95 Cs5 W22 26.4(5) . . ?  
O13 Cs5 W22 109.4(5) 2\_655 . ?  
O38 Cs5 W22 104.6(5) . . ?  
O18 Cs5 W22 123.8(6) 2\_655 . ?  
O19 Cs5 W22 156.2(6) 2\_655 . ?  
O104 Cs5 W22 57.6(4) . . ?  
W1 Cs5 W22 107.57(15) 2\_655 . ?  
W23 Cs5 W22 52.48(7) . . ?  
O360 Cs6 O368 133.3(16) . . ?  
O360 Cs6 O229 78.2(17) . . ?  
O368 Cs6 O229 66.8(8) . . ?  
O360 Cs6 O386 68(2) . . ?  
O368 Cs6 O386 158.1(16) . . ?  
O229 Cs6 O386 121.4(15) . . ?  
O360 Cs6 O129 144.5(15) . . ?  
O368 Cs6 O129 61.0(7) . . ?  
O229 Cs6 O129 82.5(7) . . ?  
O386 Cs6 O129 98.6(15) . . ?  
O360 Cs6 O208 71.9(16) . . ?  
O368 Cs6 O208 102.5(8) . . ?  
O229 Cs6 O208 47.4(7) . . ?  
O386 Cs6 O208 76.6(16) . . ?  
O129 Cs6 O208 73.1(7) . . ?  
O360 Cs6 O248 118.4(15) . . ?  
O368 Cs6 O248 50.6(8) . . ?  
O229 Cs6 O248 106.6(7) . . ?  
O386 Cs6 O248 131.2(16) . . ?  
O129 Cs6 O248 95.5(6) . . ?  
O208 Cs6 O248 151.9(8) . . ?  
O360 Cs6 Na12 132.4(17) . . ?  
O368 Cs6 Na12 82.4(7) . . ?  
O229 Cs6 Na12 148.0(7) . . ?  
O386 Cs6 Na12 84.6(15) . . ?  
O129 Cs6 Na12 74.8(6) . . ?  
O208 Cs6 Na12 139.6(7) . . ?  
O248 Cs6 Na12 54.8(6) . . ?  
O360 Cs6 O309 71.6(15) . . ?  
O368 Cs6 O309 75.8(8) . . ?  
O229 Cs6 O309 85.7(8) . . ?  
O386 Cs6 O309 123.1(16) . . ?  
O129 Cs6 O309 136.4(7) . . ?  
O208 Cs6 O309 125.0(8) . . ?  
O248 Cs6 O309 48.5(7) . . ?  
Na12 Cs6 O309 95.3(6) . . ?  
O360 Cs6 W63 96.1(14) . . ?  
O368 Cs6 W63 64.2(6) . . ?  
O229 Cs6 W63 102.3(5) . . ?

O386 Cs6 W63 126.7(15) . . ?  
O129 Cs6 W63 117.1(4) . . ?  
O208 Cs6 W63 148.5(6) . . ?  
O248 Cs6 W63 22.3(5) . . ?  
Na12 Cs6 W63 69.7(4) . . ?  
O309 Cs6 W63 27.3(5) . . ?  
O360 Cs6 Cs4 110.5(14) . 1\_455 ?  
O368 Cs6 Cs4 98.1(6) . 1\_455 ?  
O229 Cs6 Cs4 87.3(5) . 1\_455 ?  
O386 Cs6 Cs4 63.9(15) . 1\_455 ?  
O129 Cs6 Cs4 38.6(4) . 1\_455 ?  
O208 Cs6 Cs4 50.9(6) . 1\_455 ?  
O248 Cs6 Cs4 130.9(5) . 1\_455 ?  
Na12 Cs6 Cs4 88.7(4) . 1\_455 ?  
O309 Cs6 Cs4 172.1(6) . 1\_455 ?  
W63 Cs6 Cs4 153.1(2) . 1\_455 ?  
O34 Ho1 O28 77.9(10) . . ?  
O34 Ho1 O36 82.8(9) . . ?  
O28 Ho1 O36 80.3(11) . . ?  
O34 Ho1 O29 112.3(10) . . ?  
O28 Ho1 O29 72.9(10) . . ?  
O36 Ho1 O29 145.0(9) . . ?  
O34 Ho1 O77 141.0(10) . . ?  
O28 Ho1 O77 141.1(9) . . ?  
O36 Ho1 O77 100.0(10) . . ?  
O29 Ho1 O77 87.6(9) . . ?  
O34 Ho1 O38 142.8(10) . . ?  
O28 Ho1 O38 72.7(10) . . ?  
O36 Ho1 O38 70.3(9) . . ?  
O29 Ho1 O38 80.3(9) . . ?  
O77 Ho1 O38 71.0(10) . . ?  
O34 Ho1 O37 72.5(9) . . ?  
O28 Ho1 O37 124.6(10) . . ?  
O36 Ho1 O37 138.2(9) . . ?  
O29 Ho1 O37 76.6(9) . . ?  
O77 Ho1 O37 80.6(9) . . ?  
O38 Ho1 O37 144.0(9) . . ?  
O34 Ho1 O72 71.8(10) . . ?  
O28 Ho1 O72 142.3(9) . . ?  
O36 Ho1 O72 74.2(9) . . ?  
O29 Ho1 O72 139.7(9) . . ?  
O77 Ho1 O72 71.7(9) . . ?  
O38 Ho1 O72 121.8(10) . . ?  
O37 Ho1 O72 66.3(9) . . ?  
O35 Ho2 O74 137.8(11) . . ?  
O35 Ho2 O73 70.0(10) . . ?  
O74 Ho2 O73 152.2(10) . . ?  
O35 Ho2 O52 77.7(10) . . ?  
O74 Ho2 O52 74.0(10) . . ?  
O73 Ho2 O52 121.2(9) . . ?  
O35 Ho2 O53 114.3(10) . . ?  
O74 Ho2 O53 86.2(10) . . ?  
O73 Ho2 O53 77.8(9) . . ?  
O52 Ho2 O53 72.7(10) . . ?  
O35 Ho2 O158 142.4(9) . . ?  
O74 Ho2 O158 73.7(9) . . ?  
O73 Ho2 O158 81.5(9) . . ?  
O52 Ho2 O158 139.5(9) . . ?  
O53 Ho2 O158 81.5(10) . . ?  
O35 Ho2 O76 80.3(10) . . ?  
O74 Ho2 O76 103.0(10) . . ?  
O73 Ho2 O76 79.8(10) . . ?  
O52 Ho2 O76 140.8(11) . . ?  
O53 Ho2 O76 146.5(11) . . ?

O158 Ho2 O76 70.7(10) . . ?  
O35 Ho2 O75 69.4(11) . . ?  
O74 Ho2 O75 73.4(10) . . ?  
O73 Ho2 O75 130.9(10) . . ?  
O52 Ho2 O75 74.9(10) . . ?  
O53 Ho2 O75 145.4(10) . . ?  
O158 Ho2 O75 117.4(10) . . ?  
O76 Ho2 O75 67.1(11) . . ?  
O114 Ho3 O115 83.5(9) . . ?  
O114 Ho3 O111 71.4(9) . . ?  
O115 Ho3 O111 83.2(8) . . ?  
O114 Ho3 O88 76.0(10) . . ?  
O115 Ho3 O88 137.7(11) . . ?  
O111 Ho3 O88 122.8(9) . . ?  
O114 Ho3 O91 114.0(9) . . ?  
O115 Ho3 O91 151.6(9) . . ?  
O111 Ho3 O91 81.8(8) . . ?  
O88 Ho3 O91 70.2(10) . . ?  
O114 Ho3 O112 138.3(10) . . ?  
O115 Ho3 O112 100.2(9) . . ?  
O111 Ho3 O112 150.2(9) . . ?  
O88 Ho3 O112 73.9(10) . . ?  
O91 Ho3 O112 81.8(9) . . ?  
O114 Ho3 O113 146.8(9) . . ?  
O115 Ho3 O113 73.8(9) . . ?  
O111 Ho3 O113 81.9(9) . . ?  
O88 Ho3 O113 136.6(10) . . ?  
O91 Ho3 O113 80.3(9) . . ?  
O112 Ho3 O113 70.9(9) . . ?  
O114 Ho3 O156 70.3(9) . . ?  
O115 Ho3 O156 68.0(8) . . ?  
O111 Ho3 O156 134.0(8) . . ?  
O88 Ho3 O156 70.4(10) . . ?  
O91 Ho3 O156 137.6(8) . . ?  
O112 Ho3 O156 72.8(9) . . ?  
O113 Ho3 O156 120.3(8) . . ?  
O114 Ho3 Cs3 108.6(7) . . ?  
O115 Ho3 Cs3 48.8(6) . . ?  
O111 Ho3 Cs3 130.3(5) . . ?  
O88 Ho3 Cs3 104.1(8) . . ?  
O91 Ho3 Cs3 133.5(6) . . ?  
O112 Ho3 Cs3 53.5(6) . . ?  
O113 Ho3 Cs3 74.0(6) . . ?  
O156 Ho3 Cs3 46.3(6) . . ?  
O114 Ho3 Cs2 125.7(7) . . ?  
O115 Ho3 Cs2 99.1(7) . . ?  
O111 Ho3 Cs2 55.3(6) . . ?  
O88 Ho3 Cs2 122.9(8) . . ?  
O91 Ho3 Cs2 52.6(6) . . ?  
O112 Ho3 Cs2 95.0(7) . . ?  
O113 Ho3 Cs2 39.3(6) . . ?  
O156 Ho3 Cs2 159.6(6) . . ?  
Cs3 Ho3 Cs2 113.25(7) . . ?  
O117 Ho4 O123 111.9(9) . . ?  
O117 Ho4 O118 69.0(9) . . ?  
O123 Ho4 O118 80.2(9) . . ?  
O117 Ho4 O124 72.9(9) . . ?  
O123 Ho4 O124 71.1(9) . . ?  
O118 Ho4 O124 118.0(9) . . ?  
O117 Ho4 O120 84.7(9) . . ?  
O123 Ho4 O120 148.9(9) . . ?  
O118 Ho4 O120 81.9(9) . . ?  
O124 Ho4 O120 140.0(8) . . ?  
O117 Ho4 O122 140.3(9) . . ?

O123 Ho4 O122 77.1(9) . . ?  
O118 Ho4 O122 148.6(8) . . ?  
O124 Ho4 O122 74.3(9) . . ?  
O120 Ho4 O122 107.5(9) . . ?  
O117 Ho4 O116 143.3(9) . . ?  
O123 Ho4 O116 74.3(9) . . ?  
O118 Ho4 O116 77.0(8) . . ?  
O124 Ho4 O116 138.4(8) . . ?  
O120 Ho4 O116 77.0(8) . . ?  
O122 Ho4 O116 76.1(9) . . ?  
O117 Ho4 O121 73.8(8) . . ?  
O123 Ho4 O121 140.1(9) . . ?  
O118 Ho4 O121 134.0(8) . . ?  
O124 Ho4 O121 73.6(9) . . ?  
O120 Ho4 O121 68.5(8) . . ?  
O122 Ho4 O121 76.1(8) . . ?  
O116 Ho4 O121 125.9(9) . . ?  
O193 Ho5 O194 148.5(9) . . ?  
O193 Ho5 O161 111.1(9) . . ?  
O194 Ho5 O161 81.5(9) . . ?  
O193 Ho5 O190 70.9(9) . . ?  
O194 Ho5 O190 140.7(8) . . ?  
O161 Ho5 O190 81.4(8) . . ?  
O193 Ho5 O192 145.3(9) . . ?  
O194 Ho5 O192 63.3(9) . . ?  
O161 Ho5 O192 80.0(9) . . ?  
O190 Ho5 O192 78.9(9) . . ?  
O193 Ho5 O159 76.2(9) . . ?  
O194 Ho5 O159 82.3(9) . . ?  
O161 Ho5 O159 69.1(8) . . ?  
O190 Ho5 O159 123.2(9) . . ?  
O192 Ho5 O159 136.8(8) . . ?  
O193 Ho5 O191 82.2(10) . . ?  
O194 Ho5 O191 101.0(10) . . ?  
O161 Ho5 O191 150.4(9) . . ?  
O190 Ho5 O191 78.3(9) . . ?  
O192 Ho5 O191 75.1(9) . . ?  
O159 Ho5 O191 140.5(8) . . ?  
O193 Ho5 O189 75.2(9) . . ?  
O194 Ho5 O189 76.8(8) . . ?  
O161 Ho5 O189 138.8(9) . . ?  
O190 Ho5 O189 135.4(8) . . ?  
O192 Ho5 O189 118.8(9) . . ?  
O159 Ho5 O189 73.6(9) . . ?  
O191 Ho5 O189 69.1(10) . . ?  
O193 Ho5 W41 172.9(7) . . ?  
O194 Ho5 W41 30.3(6) . . ?  
O161 Ho5 W41 75.9(6) . . ?  
O190 Ho5 W41 110.7(6) . . ?  
O192 Ho5 W41 33.3(6) . . ?  
O159 Ho5 W41 107.5(6) . . ?  
O191 Ho5 W41 91.4(7) . . ?  
O189 Ho5 W41 99.9(7) . . ?  
O193 Ho5 Cs3 126.2(6) . . ?  
O194 Ho5 Cs3 84.5(6) . . ?  
O161 Ho5 Cs3 50.8(7) . . ?  
O190 Ho5 Cs3 57.5(5) . . ?  
O192 Ho5 Cs3 37.1(6) . . ?  
O159 Ho5 Cs3 119.6(5) . . ?  
O191 Ho5 Cs3 99.8(7) . . ?  
O189 Ho5 Cs3 155.5(7) . . ?  
W41 Ho5 Cs3 57.58(5) . . ?  
O195 Ho6 O201 76.8(10) . . ?  
O195 Ho6 O204 108.2(10) . . ?



O201 Ho6 O204 73.7(11) . . ?  
O195 Ho6 O169 82.4(8) . . ?  
O201 Ho6 O169 139.7(10) . . ?  
O204 Ho6 O169 146.3(10) . . ?  
O195 Ho6 O229 73.8(10) . . ?  
O201 Ho6 O229 128.4(10) . . ?  
O204 Ho6 O229 76.5(10) . . ?  
O169 Ho6 O229 76.1(9) . . ?  
O195 Ho6 O231 142.2(9) . . ?  
O201 Ho6 O231 139.9(11) . . ?  
O204 Ho6 O231 82.0(10) . . ?  
O169 Ho6 O231 71.7(9) . . ?  
O229 Ho6 O231 73.6(10) . . ?  
O195 Ho6 O230 144.6(11) . . ?  
O201 Ho6 O230 75.6(11) . . ?  
O204 Ho6 O230 84.6(11) . . ?  
O169 Ho6 O230 105.3(10) . . ?  
O229 Ho6 O230 141.4(12) . . ?  
O231 Ho6 O230 70.7(11) . . ?  
O195 Ho6 O232 78.6(10) . . ?  
O201 Ho6 O232 75.0(10) . . ?  
O204 Ho6 O232 145.3(10) . . ?  
O169 Ho6 O232 67.2(9) . . ?  
O229 Ho6 O232 136.3(10) . . ?  
O231 Ho6 O232 113.9(10) . . ?  
O230 Ho6 O232 73.3(12) . . ?  
O195 Ho6 K2 112.8(6) . 2\_546 ?  
O201 Ho6 K2 112.2(8) . 2\_546 ?  
O204 Ho6 K2 138.9(8) . 2\_546 ?  
O169 Ho6 K2 46.8(6) . 2\_546 ?  
O229 Ho6 K2 118.0(6) . 2\_546 ?  
O231 Ho6 K2 67.9(7) . 2\_546 ?  
O230 Ho6 K2 59.8(8) . 2\_546 ?  
O232 Ho6 K2 46.2(7) . 2\_546 ?  
O261 Ho7 O239 74.5(10) . . ?  
O261 Ho7 O237 140.6(10) . 2\_546 ?  
O239 Ho7 O237 80.4(10) . 2\_546 ?  
O261 Ho7 O236 114.6(11) . . ?  
O239 Ho7 O236 72.7(10) . . ?  
O237 Ho7 O236 85.4(10) 2\_546 . ?  
O261 Ho7 O265 82.9(10) . . ?  
O239 Ho7 O265 141.8(9) . . ?  
O237 Ho7 O265 99.7(9) 2\_546 . ?  
O236 Ho7 O265 145.4(10) . . ?  
O261 Ho7 O262 71.1(11) . . ?  
O239 Ho7 O262 120.3(11) . . ?  
O237 Ho7 O262 148.3(11) 2\_546 . ?  
O236 Ho7 O262 79.4(10) . . ?  
O265 Ho7 O262 78.8(10) . . ?  
O261 Ho7 O263 140.4(10) . . ?  
O239 Ho7 O263 142.1(9) . . ?  
O237 Ho7 O263 74.9(9) 2\_546 . ?  
O236 Ho7 O263 77.0(10) . . ?  
O265 Ho7 O263 71.5(9) . . ?  
O262 Ho7 O263 74.6(10) . . ?  
O261 Ho7 O264 71.2(10) . . ?  
O239 Ho7 O264 74.0(10) . . ?  
O237 Ho7 O264 73.0(9) 2\_546 . ?  
O236 Ho7 O264 142.7(10) . . ?  
O265 Ho7 O264 69.7(10) . . ?  
O262 Ho7 O264 133.0(10) . . ?  
O263 Ho7 O264 123.6(10) . . ?  
O261 Ho7 K2 125.6(7) . 2\_546 ?  
O239 Ho7 K2 119.0(6) . 2\_546 ?

O237 Ho7 K2 93.0(6) 2\_546 2\_546 ?  
O236 Ho7 K2 46.3(8) . 2\_546 ?  
O265 Ho7 K2 99.1(7) . 2\_546 ?  
O262 Ho7 K2 56.5(8) . 2\_546 ?  
O263 Ho7 K2 36.6(6) . 2\_546 ?  
O264 Ho7 K2 159.7(8) . 2\_546 ?  
O272 Ho8 O302 70.6(12) . . ?  
O272 Ho8 O275 82.3(11) . . ?  
O302 Ho8 O275 113.2(10) . . ?  
O272 Ho8 O278 124.0(11) . . ?  
O302 Ho8 O278 77.7(11) . . ?  
O275 Ho8 O278 69.4(10) . . ?  
O272 Ho8 O304 74.4(12) . . ?  
O302 Ho8 O304 143.0(11) . . ?  
O275 Ho8 O304 72.8(10) . . ?  
O278 Ho8 O304 134.0(10) . . ?  
O272 Ho8 O305 145.2(12) . . ?  
O302 Ho8 O305 144.2(12) . . ?  
O275 Ho8 O305 82.0(10) . . ?  
O278 Ho8 O305 78.2(10) . . ?  
O304 Ho8 O305 71.3(11) . . ?  
O272 Ho8 O303 135.0(11) . . ?  
O302 Ho8 O303 77.3(11) . . ?  
O275 Ho8 O303 140.6(11) . . ?  
O278 Ho8 O303 76.7(10) . . ?  
O304 Ho8 O303 122.5(11) . . ?  
O305 Ho8 O303 71.6(11) . . ?  
O272 Ho8 O306 73.7(10) . . ?  
O302 Ho8 O306 83.9(10) . . ?  
O275 Ho8 O306 143.9(11) . . ?  
O278 Ho8 O306 146.7(10) . . ?  
O304 Ho8 O306 75.0(10) . . ?  
O305 Ho8 O306 102.8(10) . . ?  
O303 Ho8 O306 72.2(11) . . ?  
O272 Ho8 Cs3 106.1(8) . . ?  
O302 Ho8 Cs3 132.2(7) . . ?  
O275 Ho8 Cs3 113.4(8) . . ?  
O278 Ho8 Cs3 129.1(7) . . ?  
O304 Ho8 Cs3 49.1(7) . . ?  
O305 Ho8 Cs3 53.7(7) . . ?  
O303 Ho8 Cs3 73.6(8) . . ?  
O306 Ho8 Cs3 51.6(7) . . ?  
O1 W1 O18 98.4(15) . . ?  
O1 W1 O13 100.9(14) . . ?  
O18 W1 O13 89.4(13) . . ?  
O1 W1 O10 98.5(14) . . ?  
O18 W1 O10 162.9(14) . . ?  
O13 W1 O10 90.1(12) . . ?  
O1 W1 O12 99.2(14) . . ?  
O18 W1 O12 89.2(12) . . ?  
O13 W1 O12 159.9(13) . . ?  
O10 W1 O12 85.5(11) . . ?  
O1 W1 O27 172.8(14) . . ?  
O18 W1 O27 77.5(13) . . ?  
O13 W1 O27 73.4(11) . . ?  
O10 W1 O27 86.0(12) . . ?  
O12 W1 O27 86.7(11) . . ?  
O1 W1 Cs5 74.3(12) . 2\_655 ?  
O18 W1 Cs5 52.8(10) . 2\_655 ?  
O13 W1 Cs5 50.7(8) . 2\_655 ?  
O10 W1 Cs5 135.8(9) . 2\_655 ?  
O12 W1 Cs5 138.5(8) . 2\_655 ?  
O27 W1 Cs5 98.6(7) . 2\_655 ?  
O2 W2 O14 101.2(13) . . ?

O2 W2 O15 98.5(14) . . ?  
O14 W2 O15 95.6(13) . . ?  
O2 W2 O10 102.8(14) . . ?  
O14 W2 O10 90.5(12) . . ?  
O15 W2 O10 156.2(12) . . ?  
O2 W2 O11 99.6(12) . . ?  
O14 W2 O11 159.0(12) . . ?  
O15 W2 O11 84.2(11) . . ?  
O10 W2 O11 82.1(11) . . ?  
O2 W2 O26 170.9(12) . . ?  
O14 W2 O26 74.2(11) . . ?  
O15 W2 O26 74.5(11) . . ?  
O10 W2 O26 85.2(11) . . ?  
O11 W2 O26 85.6(10) . . ?  
O2 W2 K3 85.5(10) . . ?  
O14 W2 K3 137.3(9) . . ?  
O15 W2 K3 41.9(9) . . ?  
O10 W2 K3 129.5(9) . . ?  
O11 W2 K3 47.5(7) . . ?  
O26 W2 K3 92.7(7) . . ?  
O3 W3 O16 101.8(14) . . ?  
O3 W3 O11 101.7(12) . . ?  
O16 W3 O11 94.9(12) . . ?  
O3 W3 O12 98.3(14) . . ?  
O16 W3 O12 158.3(14) . . ?  
O11 W3 O12 88.9(11) . . ?  
O3 W3 O17 97.3(13) . . ?  
O16 W3 O17 87.2(13) . . ?  
O11 W3 O17 160.0(13) . . ?  
O12 W3 O17 82.3(12) . . ?  
O3 W3 O25 168.6(11) . . ?  
O16 W3 O25 73.5(12) . . ?  
O11 W3 O25 89.2(10) . . ?  
O12 W3 O25 85.3(11) . . ?  
O17 W3 O25 72.4(11) . . ?  
O3 W3 K3 88.7(10) . . ?  
O16 W3 K3 51.9(9) . . ?  
O11 W3 K3 48.5(8) . . ?  
O12 W3 K3 137.2(8) . . ?  
O17 W3 K3 138.9(9) . . ?  
O25 W3 K3 96.0(7) . . ?  
O4 W4 O31 103.1(15) . . ?  
O4 W4 O23 100.4(12) . . ?  
O31 W4 O23 94.0(12) . . ?  
O4 W4 O22 101.8(13) . . ?  
O31 W4 O22 93.1(12) . . ?  
O23 W4 O22 154.4(12) . . ?  
O4 W4 O16 95.8(15) . . ?  
O31 W4 O16 161.1(13) . . ?  
O23 W4 O16 81.8(11) . . ?  
O22 W4 O16 83.6(12) . . ?  
O4 W4 O25 161.6(14) . . ?  
O31 W4 O25 93.9(12) . . ?  
O23 W4 O25 71.1(9) . . ?  
O22 W4 O25 83.9(10) . . ?  
O16 W4 O25 67.3(11) . . ?  
O4 W4 K3 82.4(11) . . ?  
O31 W4 K3 133.6(9) . . ?  
O23 W4 K3 130.8(8) . . ?  
O22 W4 K3 41.6(9) . . ?  
O16 W4 K3 49.3(8) . . ?  
O25 W4 K3 91.0(6) . . ?  
O5 W5 O30 104.3(15) . . ?  
O5 W5 O22 103.4(13) . . ?

O30 W5 O22 92.4(14) . . ?  
O5 W5 O21 99.2(13) . . ?  
O30 W5 O21 91.7(14) . . ?  
O22 W5 O21 155.3(13) . . ?  
O5 W5 O15 93.4(13) . . ?  
O30 W5 O15 162.2(14) . . ?  
O22 W5 O15 84.8(12) . . ?  
O21 W5 O15 84.0(12) . . ?  
O5 W5 O26 163.6(11) . . ?  
O30 W5 O26 90.0(13) . . ?  
O22 W5 O26 83.7(11) . . ?  
O21 W5 O26 71.9(11) . . ?  
O15 W5 O26 72.3(11) . . ?  
O5 W5 K3 78.2(11) . . ?  
O30 W5 K3 137.6(10) . . ?  
O22 W5 K3 47.4(9) . . ?  
O21 W5 K3 130.2(10) . . ?  
O15 W5 K3 47.2(8) . . ?  
O26 W5 K3 96.8(7) . . ?  
O6 W6 O29 104.1(13) . . ?  
O6 W6 O21 97.9(12) . . ?  
O29 W6 O21 95.7(12) . . ?  
O6 W6 O20 101.7(12) . . ?  
O29 W6 O20 93.2(12) . . ?  
O21 W6 O20 155.8(13) . . ?  
O6 W6 O14 94.9(12) . . ?  
O29 W6 O14 160.8(10) . . ?  
O21 W6 O14 84.2(12) . . ?  
O20 W6 O14 80.2(12) . . ?  
O6 W6 O26 165.4(12) . . ?  
O29 W6 O26 89.1(10) . . ?  
O21 W6 O26 74.2(11) . . ?  
O20 W6 O26 83.4(11) . . ?  
O14 W6 O26 72.4(10) . . ?  
O7 W7 O28 105.1(14) . . ?  
O7 W7 O20 99.5(13) . . ?  
O28 W7 O20 92.4(13) . . ?  
O7 W7 O19 95.5(13) . . ?  
O28 W7 O19 93.9(13) . . ?  
O20 W7 O19 161.6(14) . . ?  
O7 W7 O13 94.5(13) . . ?  
O28 W7 O13 160.4(12) . . ?  
O20 W7 O13 84.5(12) . . ?  
O19 W7 O13 83.8(13) . . ?  
O7 W7 O27 165.2(13) . . ?  
O28 W7 O27 88.1(12) . . ?  
O20 W7 O27 86.4(11) . . ?  
O19 W7 O27 76.6(12) . . ?  
O13 W7 O27 72.4(11) . . ?  
O7 W7 Cs5 70.5(10) . 2\_655 ?  
O28 W7 Cs5 140.4(9) . 2\_655 ?  
O20 W7 Cs5 127.2(10) . 2\_655 ?  
O19 W7 Cs5 49.2(10) . 2\_655 ?  
O13 W7 Cs5 47.0(8) . 2\_655 ?  
O27 W7 Cs5 95.1(8) . 2\_655 ?  
O8 W8 O33 99.2(15) . . ?  
O8 W8 O24 104.1(14) . . ?  
O33 W8 O24 88.4(13) . . ?  
O8 W8 O19 101.5(15) . . ?  
O33 W8 O19 93.2(14) . . ?  
O24 W8 O19 153.7(13) . . ?  
O8 W8 O18 99.3(15) . . ?  
O33 W8 O18 161.1(12) . . ?  
O24 W8 O18 83.7(13) . . ?

O19 W8 O18 86.5(13) . . ?  
O8 W8 O27 167.9(13) . . ?  
O33 W8 O27 91.6(11) . . ?  
O24 W8 O27 81.4(11) . . ?  
O19 W8 O27 72.4(12) . . ?  
O18 W8 O27 70.3(11) . . ?  
O8 W8 Cs5 74.9(11) . 2\_655 ?  
O33 W8 Cs5 139.1(9) . 2\_655 ?  
O24 W8 Cs5 132.5(10) . 2\_655 ?  
O19 W8 Cs5 50.5(11) . 2\_655 ?  
O18 W8 Cs5 50.8(9) . 2\_655 ?  
O27 W8 Cs5 93.4(7) . 2\_655 ?  
O9 W9 O17 102.4(14) . . ?  
O9 W9 O23 96.5(12) . . ?  
O17 W9 O23 89.9(13) . . ?  
O9 W9 O24 104.2(13) . . ?  
O17 W9 O24 87.9(13) . . ?  
O23 W9 O24 159.2(11) . . ?  
O9 W9 O32 102.8(13) . . ?  
O17 W9 O32 154.7(11) . . ?  
O23 W9 O32 85.9(11) . . ?  
O24 W9 O32 87.3(12) . . ?  
O9 W9 O25 167.4(12) . . ?  
O17 W9 O25 72.7(11) . . ?  
O23 W9 O25 72.2(9) . . ?  
O24 W9 O25 87.3(10) . . ?  
O32 W9 O25 82.3(10) . . ?  
O34 W10 O35 99.9(13) . . ?  
O34 W10 O32 101.8(12) . . ?  
O35 W10 O32 92.4(13) . . ?  
O34 W10 O40 92.8(12) . . ?  
O35 W10 O40 101.1(13) . . ?  
O32 W10 O40 158.1(12) . . ?  
O34 W10 O33 90.5(12) . . ?  
O35 W10 O33 169.4(12) . . ?  
O32 W10 O33 83.5(12) . . ?  
O40 W10 O33 80.1(12) . . ?  
O34 W10 O39 170.3(12) . . ?  
O35 W10 O39 86.0(12) . . ?  
O32 W10 O39 85.5(12) . . ?  
O40 W10 O39 78.4(11) . . ?  
O33 W10 O39 84.0(11) . . ?  
O50 W11 O39 103.7(15) . . ?  
O50 W11 O42 98.2(15) . . ?  
O39 W11 O42 97.1(13) . . ?  
O50 W11 O41 105.4(14) . . ?  
O39 W11 O41 85.9(12) . . ?  
O42 W11 O41 154.8(14) . . ?  
O50 W11 O61 92.4(14) . . ?  
O39 W11 O61 162.4(14) . . ?  
O42 W11 O61 87.3(13) . . ?  
O41 W11 O61 83.0(11) . . ?  
O50 W11 O48 162.0(12) . . ?  
O39 W11 O48 92.9(13) . . ?  
O42 W11 O48 72.6(13) . . ?  
O41 W11 O48 82.3(11) . . ?  
O61 W11 O48 72.1(11) . . ?  
O50 W11 K4 64.6(10) . . ?  
O39 W11 K4 147.1(10) . . ?  
O42 W11 K4 57.3(10) . . ?  
O41 W11 K4 126.3(8) . . ?  
O61 W11 K4 47.6(9) . . ?  
O48 W11 K4 97.6(7) . . ?  
O59 W12 O41 98.2(14) . . ?

O59 W12 O40 105.7(14) . . ?  
O41 W12 O40 87.2(11) . . ?  
O59 W12 O60 101.3(14) . . ?  
O41 W12 O60 90.0(11) . . ?  
O40 W12 O60 153.0(12) . . ?  
O59 W12 O46 99.6(14) . . ?  
O41 W12 O46 161.9(11) . . ?  
O40 W12 O46 85.0(11) . . ?  
O60 W12 O46 89.6(12) . . ?  
O59 W12 O47 169.0(14) . . ?  
O41 W12 O47 89.7(11) . . ?  
O40 W12 O47 82.2(11) . . ?  
O60 W12 O47 70.9(11) . . ?  
O46 W12 O47 73.0(10) . . ?  
O58 W13 O45 100.8(12) . . ?  
O58 W13 O65 101.3(12) . . ?  
O45 W13 O65 88.0(11) . . ?  
O58 W13 O57 102.5(11) . . ?  
O45 W13 O57 86.3(10) . . ?  
O65 W13 O57 156.2(10) . . ?  
O58 W13 O46 99.2(12) . . ?  
O45 W13 O46 159.9(10) . . ?  
O65 W13 O46 89.8(11) . . ?  
O57 W13 O46 87.7(11) . . ?  
O58 W13 O47 169.7(12) . . ?  
O45 W13 O47 87.4(10) . . ?  
O65 W13 O47 72.6(10) . . ?  
O57 W13 O47 84.1(10) . . ?  
O46 W13 O47 72.9(10) . . ?  
O58 W13 Cs1 46.0(10) . . ?  
O45 W13 Cs1 54.9(7) . . ?  
O65 W13 Cs1 97.0(9) . . ?  
O57 W13 Cs1 98.5(8) . . ?  
O46 W13 Cs1 145.2(7) . . ?  
O47 W13 Cs1 141.7(7) . . ?  
O56 W14 O55 105.3(13) . . ?  
O56 W14 O44 103.7(13) . . ?  
O55 W14 O44 94.5(11) . . ?  
O56 W14 O45 98.5(12) . . ?  
O55 W14 O45 89.7(11) . . ?  
O44 W14 O45 155.4(11) . . ?  
O56 W14 O64 89.7(13) . . ?  
O55 W14 O64 164.2(13) . . ?  
O44 W14 O64 86.6(11) . . ?  
O45 W14 O64 83.1(10) . . ?  
O56 W14 O49 163.8(11) . . ?  
O55 W14 O49 90.9(11) . . ?  
O44 W14 O49 73.4(11) . . ?  
O45 W14 O49 82.3(10) . . ?  
O64 W14 O49 74.3(10) . . ?  
O56 W14 Cs1 47.3(10) . . ?  
O55 W14 Cs1 90.9(8) . . ?  
O44 W14 Cs1 150.7(9) . . ?  
O45 W14 Cs1 53.1(7) . . ?  
O64 W14 Cs1 95.8(8) . . ?  
O49 W14 Cs1 135.3(6) . . ?  
O54 W15 O53 103.3(13) . . ?  
O54 W15 O43 99.3(13) . . ?  
O53 W15 O43 91.7(13) . . ?  
O54 W15 O44 99.6(13) . . ?  
O53 W15 O44 96.9(12) . . ?  
O43 W15 O44 156.8(12) . . ?  
O54 W15 O63 95.8(12) . . ?  
O53 W15 O63 160.9(12) . . ?

O43 W15 O63 84.7(12) . . ?  
O44 W15 O63 80.1(11) . . ?  
O54 W15 O49 167.7(12) . . ?  
O53 W15 O49 88.2(11) . . ?  
O43 W15 O49 84.6(11) . . ?  
O44 W15 O49 74.3(11) . . ?  
O63 W15 O49 72.8(10) . . ?  
O51 W16 O52 102.3(14) . . ?  
O51 W16 O43 103.3(14) . . ?  
O52 W16 O43 90.7(12) . . ?  
O51 W16 O42 94.8(15) . . ?  
O52 W16 O42 94.6(13) . . ?  
O43 W16 O42 159.6(13) . . ?  
O51 W16 O62 95.6(13) . . ?  
O52 W16 O62 161.8(12) . . ?  
O43 W16 O62 87.8(12) . . ?  
O42 W16 O62 81.1(13) . . ?  
O51 W16 O48 165.2(14) . . ?  
O52 W16 O48 89.1(11) . . ?  
O43 W16 O48 85.7(12) . . ?  
O42 W16 O48 74.7(13) . . ?  
O62 W16 O48 72.7(11) . . ?  
O71 W17 O62 101.1(14) . . ?  
O71 W17 O61 99.5(15) . . ?  
O62 W17 O61 91.1(14) . . ?  
O71 W17 O67 100.6(15) . . ?  
O62 W17 O67 94.5(14) . . ?  
O61 W17 O67 157.6(11) . . ?  
O71 W17 O68 100.1(14) . . ?  
O62 W17 O68 158.8(11) . . ?  
O61 W17 O68 84.2(12) . . ?  
O67 W17 O68 82.7(12) . . ?  
O71 W17 O48 171.8(15) . . ?  
O62 W17 O48 73.2(11) . . ?  
O61 W17 O48 75.0(12) . . ?  
O67 W17 O48 85.9(12) . . ?  
O68 W17 O48 85.6(10) . . ?  
O71 W17 K4 71.6(13) . . ?  
O62 W17 K4 59.9(11) . . ?  
O61 W17 K4 48.5(9) . . ?  
O67 W17 K4 149.7(9) . . ?  
O68 W17 K4 127.1(9) . . ?  
O48 W17 K4 100.2(8) . . ?  
O71 W17 K1 53.7(12) . 1\_565 ?  
O62 W17 K1 47.7(9) . 1\_565 ?  
O61 W17 K1 93.8(9) . 1\_565 ?  
O67 W17 K1 106.0(8) . 1\_565 ?  
O68 W17 K1 153.1(8) . 1\_565 ?  
O48 W17 K1 119.9(8) . 1\_565 ?  
K4 W17 K1 45.3(3) . 1\_565 ?  
O70 W18 O66 101.9(12) . . ?  
O70 W18 O68 100.5(11) . . ?  
O66 W18 O68 92.8(12) . . ?  
O70 W18 O60 97.9(12) . . ?  
O66 W18 O60 159.8(12) . . ?  
O68 W18 O60 87.0(12) . . ?  
O70 W18 O65 99.0(11) . . ?  
O66 W18 O65 89.1(11) . . ?  
O68 W18 O65 159.6(11) . . ?  
O60 W18 O65 84.3(11) . . ?  
O70 W18 O47 166.5(10) . . ?  
O66 W18 O47 88.1(11) . . ?  
O68 W18 O47 87.8(10) . . ?  
O60 W18 O47 71.8(11) . . ?

O65 W18 O47 71.9(10) . . ?  
O70 W18 Cs1 52.8(9) . 2 ?  
O66 W18 Cs1 50.0(9) . 2 ?  
O68 W18 Cs1 108.6(8) . 2 ?  
O60 W18 Cs1 148.2(9) . 2 ?  
O65 W18 Cs1 88.1(8) . 2 ?  
O47 W18 Cs1 134.4(8) . 2 ?  
O69 W19 O63 102.5(13) . . ?  
O69 W19 O67 101.1(13) . . ?  
O63 W19 O67 93.3(13) . . ?  
O69 W19 O64 97.0(13) . . ?  
O63 W19 O64 95.2(13) . . ?  
O67 W19 O64 157.8(12) . . ?  
O69 W19 O66 98.6(12) . . ?  
O63 W19 O66 158.9(12) . . ?  
O67 W19 O66 81.2(12) . . ?  
O64 W19 O66 83.5(11) . . ?  
O69 W19 O49 173.6(13) . . ?  
O63 W19 O49 75.4(11) . . ?  
O67 W19 O49 85.1(11) . . ?  
O64 W19 O49 77.2(11) . . ?  
O66 W19 O49 83.8(10) . . ?  
O69 W19 Cs1 50.9(9) . 2 ?  
O63 W19 Cs1 151.3(10) . 2 ?  
O67 W19 Cs1 101.7(9) . 2 ?  
O64 W19 Cs1 80.0(9) . 2 ?  
O66 W19 Cs1 49.3(8) . 2 ?  
O49 W19 Cs1 129.7(6) . 2 ?  
O72 W20 O73 99.8(12) . . ?  
O72 W20 O57 93.5(12) . . ?  
O73 W20 O57 106.1(11) . . ?  
O72 W20 O109 103.1(11) . . ?  
O73 W20 O109 91.1(11) . . ?  
O57 W20 O109 153.8(11) . . ?  
O72 W20 O55 172.4(12) . . ?  
O73 W20 O55 84.2(11) . . ?  
O57 W20 O55 79.2(10) . . ?  
O109 W20 O55 83.2(10) . . ?  
O72 W20 O110 95.7(11) . . ?  
O73 W20 O110 159.1(11) . . ?  
O57 W20 O110 86.8(10) . . ?  
O109 W20 O110 71.6(10) . . ?  
O55 W20 O110 82.2(9) . . ?  
O72 W20 Cs2 62.8(9) . . ?  
O73 W20 Cs2 74.6(8) . . ?  
O57 W20 Cs2 155.6(8) . . ?  
O109 W20 Cs2 47.8(8) . . ?  
O55 W20 Cs2 124.7(7) . . ?  
O110 W20 Cs2 100.4(6) . . ?  
O111 W21 O120 101.4(11) . . ?  
O111 W21 O109 99.3(11) . . ?  
O120 W21 O109 99.1(11) . . ?  
O111 W21 O80 104.2(10) . . ?  
O120 W21 O80 96.2(11) . . ?  
O109 W21 O80 148.7(11) . . ?  
O111 W21 O110 164.6(11) . . ?  
O120 W21 O110 92.7(10) . . ?  
O109 W21 O110 72.1(10) . . ?  
O80 W21 O110 80.1(10) . . ?  
O111 W21 O157 82.8(10) . . ?  
O120 W21 O157 174.9(10) . . ?  
O109 W21 O157 83.1(9) . . ?  
O80 W21 O157 79.8(9) . . ?  
O110 W21 O157 83.5(9) . . ?



O111 W21 Cs2 64.9(8) . . ?  
O120 W21 Cs2 135.8(8) . . ?  
O109 W21 Cs2 47.9(7) . . ?  
O80 W21 Cs2 127.4(7) . . ?  
O110 W21 Cs2 100.6(7) . . ?  
O157 W21 Cs2 48.7(6) . . ?  
O79 W22 O78 100.5(13) . . ?  
O79 W22 O81 98.0(13) . . ?  
O78 W22 O81 161.4(11) . . ?  
O79 W22 O95 103.9(12) . . ?  
O78 W22 O95 87.1(12) . . ?  
O81 W22 O95 91.0(12) . . ?  
O79 W22 O80 99.5(12) . . ?  
O78 W22 O80 87.7(11) . . ?  
O81 W22 O80 86.7(11) . . ?  
O95 W22 O80 156.6(11) . . ?  
O79 W22 O101 170.1(13) . . ?  
O78 W22 O101 89.2(10) . . ?  
O81 W22 O101 72.5(10) . . ?  
O95 W22 O101 74.2(10) . . ?  
O80 W22 O101 82.9(9) . . ?  
O79 W22 Cs5 84.1(10) . . ?  
O78 W22 Cs5 47.2(8) . . ?  
O81 W22 Cs5 138.4(8) . . ?  
O95 W22 Cs5 48.9(9) . . ?  
O80 W22 Cs5 134.2(8) . . ?  
O101 W22 Cs5 101.2(6) . . ?  
O79 W22 Cs1 31.7(10) . . ?  
O78 W22 Cs1 121.4(8) . . ?  
O81 W22 Cs1 74.5(7) . . ?  
O95 W22 Cs1 124.4(8) . . ?  
O80 W22 Cs1 77.3(7) . . ?  
O101 W22 Cs1 142.1(6) . . ?  
Cs5 W22 Cs1 115.79(10) . . ?  
O77 W23 O157 104.8(12) . . ?  
O77 W23 O93 95.5(13) . . ?  
O157 W23 O93 91.4(11) . . ?  
O77 W23 O78 105.4(12) . . ?  
O157 W23 O78 89.5(11) . . ?  
O93 W23 O78 158.1(12) . . ?  
O77 W23 O94 88.8(11) . . ?  
O157 W23 O94 166.3(11) . . ?  
O93 W23 O94 88.2(10) . . ?  
O78 W23 O94 85.8(10) . . ?  
O77 W23 O102 161.3(10) . . ?  
O157 W23 O102 91.5(10) . . ?  
O93 W23 O102 74.6(11) . . ?  
O78 W23 O102 83.5(10) . . ?  
O94 W23 O102 75.2(9) . . ?  
O77 W23 Cs2 81.8(9) . . ?  
O157 W23 Cs2 45.5(9) . . ?  
O93 W23 Cs2 54.9(7) . . ?  
O78 W23 Cs2 133.8(7) . . ?  
O94 W23 Cs2 140.3(7) . . ?  
O102 W23 Cs2 104.1(6) . . ?  
O77 W23 Cs5 74.8(9) . . ?  
O157 W23 Cs5 132.8(8) . . ?  
O93 W23 Cs5 135.8(8) . . ?  
O78 W23 Cs5 47.9(8) . . ?  
O94 W23 Cs5 49.4(7) . . ?  
O102 W23 Cs5 101.0(6) . . ?  
Cs2 W23 Cs5 154.84(10) . . ?  
O92 W24 O91 103.0(11) . . ?  
O92 W24 O90 101.1(11) . . ?

O91 W24 O90 92.1(11) . . ?  
O92 W24 O93 97.4(12) . . ?  
O91 W24 O93 94.2(11) . . ?  
O90 W24 O93 158.6(11) . . ?  
O92 W24 O99 95.8(10) . . ?  
O91 W24 O99 161.1(11) . . ?  
O90 W24 O99 86.0(10) . . ?  
O93 W24 O99 81.5(10) . . ?  
O92 W24 O102 165.9(11) . . ?  
O91 W24 O102 88.6(10) . . ?  
O90 W24 O102 86.2(10) . . ?  
O93 W24 O102 73.5(10) . . ?  
O99 W24 O102 72.5(9) . . ?  
O92 W24 Cs2 84.9(7) . . ?  
O91 W24 Cs2 53.2(9) . . ?  
O90 W24 Cs2 145.0(7) . . ?  
O93 W24 Cs2 47.2(7) . . ?  
O99 W24 Cs2 128.0(7) . . ?  
O102 W24 Cs2 95.9(6) . . ?  
O89 W25 O88 101.8(13) . . ?  
O89 W25 O90 100.5(12) . . ?  
O88 W25 O90 88.8(13) . . ?  
O89 W25 O87 96.8(14) . . ?  
O88 W25 O87 97.4(14) . . ?  
O90 W25 O87 160.0(11) . . ?  
O89 W25 O98 95.9(11) . . ?  
O88 W25 O98 161.7(12) . . ?  
O90 W25 O98 83.6(10) . . ?  
O87 W25 O98 84.7(11) . . ?  
O89 W25 O100 166.4(11) . . ?  
O88 W25 O100 90.4(12) . . ?  
O90 W25 O100 85.5(10) . . ?  
O87 W25 O100 75.5(11) . . ?  
O98 W25 O100 72.4(9) . . ?  
O86 W26 O85 101.5(12) . . ?  
O86 W26 O87 100.5(13) . . ?  
O85 W26 O87 92.9(11) . . ?  
O86 W26 O84 103.3(12) . . ?  
O85 W26 O84 90.9(10) . . ?  
O87 W26 O84 154.7(13) . . ?  
O86 W26 O97 94.3(12) . . ?  
O85 W26 O97 164.1(11) . . ?  
O87 W26 O97 86.2(11) . . ?  
O84 W26 O97 83.4(10) . . ?  
O86 W26 O100 163.4(10) . . ?  
O85 W26 O100 93.1(10) . . ?  
O87 W26 O100 70.6(11) . . ?  
O84 W26 O100 84.2(10) . . ?  
O97 W26 O100 71.6(10) . . ?  
O83 W27 O84 99.6(13) . . ?  
O83 W27 O96 100.4(13) . . ?  
O84 W27 O96 88.8(11) . . ?  
O83 W27 O82 105.6(12) . . ?  
O84 W27 O82 89.0(10) . . ?  
O96 W27 O82 153.8(12) . . ?  
O83 W27 O81 99.5(13) . . ?  
O84 W27 O81 160.8(12) . . ?  
O96 W27 O81 87.0(11) . . ?  
O82 W27 O81 86.6(11) . . ?  
O83 W27 O101 168.4(12) . . ?  
O84 W27 O101 89.4(10) . . ?  
O96 W27 O101 72.3(11) . . ?  
O82 W27 O101 81.6(10) . . ?  
O81 W27 O101 71.5(10) . . ?

O107 W28 O103 101.3(12) . . ?  
O107 W28 O104 103.4(13) . . ?  
O103 W28 O104 90.4(12) . . ?  
O107 W28 O96 97.4(12) . . ?  
O103 W28 O96 90.1(12) . . ?  
O104 W28 O96 158.7(11) . . ?  
O107 W28 O95 98.3(12) . . ?  
O103 W28 O95 159.9(11) . . ?  
O104 W28 O95 89.3(12) . . ?  
O96 W28 O95 83.0(11) . . ?  
O107 W28 O101 165.6(11) . . ?  
O103 W28 O101 87.6(10) . . ?  
O104 W28 O101 87.7(10) . . ?  
O96 W28 O101 71.0(10) . . ?  
O95 W28 O101 72.4(10) . . ?  
O107 W28 Cs5 82.3(10) . . ?  
O103 W28 Cs5 140.6(9) . . ?  
O104 W28 Cs5 51.3(9) . . ?  
O96 W28 Cs5 128.7(8) . . ?  
O95 W28 Cs5 46.9(9) . . ?  
O101 W28 Cs5 98.1(7) . . ?  
O108 W29 O99 100.7(12) . . ?  
O108 W29 O94 100.9(12) . . ?  
O99 W29 O94 91.4(10) . . ?  
O108 W29 O105 100.5(12) . . ?  
O99 W29 O105 93.1(11) . . ?  
O94 W29 O105 156.8(10) . . ?  
O108 W29 O104 101.9(12) . . ?  
O99 W29 O104 157.3(11) . . ?  
O94 W29 O104 86.0(10) . . ?  
O105 W29 O104 81.0(11) . . ?  
O108 W29 O102 172.5(12) . . ?  
O99 W29 O102 74.4(9) . . ?  
O94 W29 O102 73.8(9) . . ?  
O105 W29 O102 85.6(9) . . ?  
O104 W29 O102 83.3(9) . . ?  
O108 W29 Cs5 85.3(9) . . ?  
O99 W29 Cs5 134.3(8) . . ?  
O94 W29 Cs5 43.4(7) . . ?  
O105 W29 Cs5 130.6(8) . . ?  
O104 W29 Cs5 50.1(8) . . ?  
O102 W29 Cs5 94.0(6) . . ?  
O106 W30 O98 104.1(11) . . ?  
O106 W30 O105 99.7(12) . . ?  
O98 W30 O105 88.3(12) . . ?  
O106 W30 O97 101.9(12) . . ?  
O98 W30 O97 93.1(12) . . ?  
O105 W30 O97 157.3(10) . . ?  
O106 W30 O103 99.6(11) . . ?  
O98 W30 O103 155.8(10) . . ?  
O105 W30 O103 82.9(11) . . ?  
O97 W30 O103 86.8(11) . . ?  
O106 W30 O100 173.9(11) . . ?  
O98 W30 O100 71.5(9) . . ?  
O105 W30 O100 84.5(10) . . ?  
O97 W30 O100 74.6(10) . . ?  
O103 W30 O100 85.3(9) . . ?  
O114 W31 O117 100.0(12) . . ?  
O114 W31 O82 101.2(12) . . ?  
O117 W31 O82 95.0(11) . . ?  
O114 W31 O126 94.6(12) . . ?  
O117 W31 O126 100.1(10) . . ?  
O82 W31 O126 155.9(10) . . ?  
O114 W31 O85 88.1(11) . . ?

O117 W31 O85 171.7(11) . . ?  
O82 W31 O85 81.4(9) . . ?  
O126 W31 O85 81.0(9) . . ?  
O114 W31 O125 171.0(12) . . ?  
O117 W31 O125 86.7(11) . . ?  
O82 W31 O125 84.0(11) . . ?  
O126 W31 O125 78.2(10) . . ?  
O85 W31 O125 85.4(9) . . ?  
O135 W32 O125 100.8(14) . . ?  
O135 W32 O136 104.7(13) . . ?  
O125 W32 O136 94.8(12) . . ?  
O135 W32 O119 103.1(12) . . ?  
O125 W32 O119 85.7(11) . . ?  
O136 W32 O119 151.5(10) . . ?  
O135 W32 O144 94.8(14) . . ?  
O125 W32 O144 162.6(12) . . ?  
O136 W32 O144 88.4(12) . . ?  
O119 W32 O144 83.4(12) . . ?  
O135 W32 O143 166.0(13) . . ?  
O125 W32 O143 92.9(10) . . ?  
O136 W32 O143 70.6(9) . . ?  
O119 W32 O143 80.9(9) . . ?  
O144 W32 O143 72.1(11) . . ?  
O135 W32 K4 54.3(11) . 1\_545 ?  
O125 W32 K4 93.1(8) . 1\_545 ?  
O136 W32 K4 158.7(8) . 1\_545 ?  
O119 W32 K4 48.9(7) . 1\_545 ?  
O144 W32 K4 89.9(9) . 1\_545 ?  
O143 W32 K4 128.7(7) . 1\_545 ?  
O133 W33 O119 102.2(11) . . ?  
O133 W33 O149 99.4(13) . . ?  
O119 W33 O149 90.5(13) . . ?  
O133 W33 O126 105.1(12) . . ?  
O119 W33 O126 87.3(11) . . ?  
O149 W33 O126 155.3(11) . . ?  
O133 W33 O132 97.5(12) . . ?  
O119 W33 O132 160.3(10) . . ?  
O149 W33 O132 87.5(13) . . ?  
O126 W33 O132 86.4(11) . . ?  
O133 W33 O142 167.6(11) . . ?  
O119 W33 O142 88.6(9) . . ?  
O149 W33 O142 74.0(11) . . ?  
O126 W33 O142 81.3(9) . . ?  
O132 W33 O142 72.0(10) . . ?  
O133 W33 K4 51.3(10) . 1\_545 ?  
O119 W33 K4 51.9(7) . 1\_545 ?  
O149 W33 K4 89.2(10) . 1\_545 ?  
O126 W33 K4 108.4(7) . 1\_545 ?  
O132 W33 K4 147.5(8) . 1\_545 ?  
O142 W33 K4 137.4(7) . 1\_545 ?  
O131 W34 O148 100.9(13) . . ?  
O131 W34 O132 98.7(12) . . ?  
O148 W34 O132 88.2(12) . . ?  
O131 W34 O130 102.4(12) . . ?  
O148 W34 O130 91.0(12) . . ?  
O132 W34 O130 158.6(12) . . ?  
O131 W34 O127 101.3(12) . . ?  
O148 W34 O127 157.8(11) . . ?  
O132 W34 O127 89.1(11) . . ?  
O130 W34 O127 83.7(11) . . ?  
O131 W34 O142 169.5(10) . . ?  
O148 W34 O142 72.9(11) . . ?  
O132 W34 O142 73.0(10) . . ?  
O130 W34 O142 86.3(10) . . ?

O127 W34 O142 85.3(10) . . ?  
O131 W34 Cs3 40.3(10) . . ?  
O148 W34 Cs3 138.0(8) . . ?  
O132 W34 Cs3 84.7(9) . . ?  
O130 W34 Cs3 109.6(9) . . ?  
O127 W34 Cs3 63.5(8) . . ?  
O142 W34 Cs3 141.9(6) . . ?  
O129 W35 O128 100.6(13) . . ?  
O129 W35 O130 101.4(12) . . ?  
O128 W35 O130 88.2(12) . . ?  
O129 W35 O140 101.4(10) . . ?  
O128 W35 O140 93.6(11) . . ?  
O130 W35 O140 156.3(11) . . ?  
O129 W35 O147 95.5(12) . . ?  
O128 W35 O147 163.9(11) . . ?  
O130 W35 O147 88.0(12) . . ?  
O140 W35 O147 83.9(11) . . ?  
O129 W35 O141 166.1(11) . . ?  
O128 W35 O141 92.9(11) . . ?  
O130 W35 O141 82.0(10) . . ?  
O140 W35 O141 74.3(9) . . ?  
O147 W35 O141 71.1(10) . . ?  
O129 W35 Cs4 51.8(8) . 1\_455 ?  
O128 W35 Cs4 116.9(8) . 1\_455 ?  
O130 W35 Cs4 144.5(9) . 1\_455 ?  
O140 W35 Cs4 53.0(6) . 1\_455 ?  
O147 W35 Cs4 74.0(7) . 1\_455 ?  
O141 W35 Cs4 118.7(6) . 1\_455 ?  
O139 W36 O123 103.4(12) . . ?  
O139 W36 O138 100.5(12) . . ?  
O123 W36 O138 92.5(11) . . ?  
O139 W36 O140 97.7(11) . . ?  
O123 W36 O140 95.6(11) . . ?  
O138 W36 O140 157.7(11) . . ?  
O139 W36 O146 98.4(12) . . ?  
O123 W36 O146 158.2(11) . . ?  
O138 W36 O146 82.5(11) . . ?  
O140 W36 O146 82.3(11) . . ?  
O139 W36 O141 166.3(11) . . ?  
O123 W36 O141 88.1(10) . . ?  
O138 W36 O141 86.3(10) . . ?  
O140 W36 O141 73.3(9) . . ?  
O146 W36 O141 70.5(10) . . ?  
O137 W37 O124 103.7(13) . . ?  
O137 W37 O138 101.7(11) . . ?  
O124 W37 O138 91.3(11) . . ?  
O137 W37 O136 97.7(11) . . ?  
O124 W37 O136 93.4(11) . . ?  
O138 W37 O136 158.3(10) . . ?  
O137 W37 O145 94.8(13) . . ?  
O124 W37 O145 161.5(11) . . ?  
O138 W37 O145 84.8(11) . . ?  
O136 W37 O145 84.1(10) . . ?  
O137 W37 O143 165.4(12) . . ?  
O124 W37 O143 87.7(11) . . ?  
O138 W37 O143 87.0(10) . . ?  
O136 W37 O143 72.1(9) . . ?  
O145 W37 O143 74.1(11) . . ?  
O155 W38 O145 102.9(14) . . ?  
O155 W38 O144 97.7(14) . . ?  
O145 W38 O144 90.3(12) . . ?  
O155 W38 O151 102.7(13) . . ?  
O145 W38 O151 92.8(11) . . ?  
O144 W38 O151 158.2(13) . . ?

O155 W38 O150 100.5 (14) . . ?  
O145 W38 O150 156.5 (13) . . ?  
O144 W38 O150 85.0 (12) . . ?  
O151 W38 O150 83.6 (11) . . ?  
O155 W38 O143 169.7 (12) . . ?  
O145 W38 O143 73.2 (11) . . ?  
O144 W38 O143 73.0 (12) . . ?  
O151 W38 O143 87.2 (11) . . ?  
O150 W38 O143 83.4 (11) . . ?  
O155 W38 K1 77.9 (10) . . ?  
O145 W38 K1 136.3 (8) . . ?  
O144 W38 K1 47.2 (10) . . ?  
O151 W38 K1 130.2 (9) . . ?  
O150 W38 K1 48.5 (8) . . ?  
O143 W38 K1 98.2 (6) . . ?  
O154 W39 O146 102.4 (14) . . ?  
O154 W39 O151 101.4 (15) . . ?  
O146 W39 O151 91.6 (12) . . ?  
O154 W39 O147 100.2 (14) . . ?  
O146 W39 O147 91.6 (12) . . ?  
O151 W39 O147 157.0 (12) . . ?  
O154 W39 O152 102.4 (14) . . ?  
O146 W39 O152 155.2 (12) . . ?  
O151 W39 O152 82.5 (11) . . ?  
O147 W39 O152 85.1 (11) . . ?  
O154 W39 O141 170.8 (13) . . ?  
O146 W39 O141 73.4 (11) . . ?  
O151 W39 O141 87.1 (11) . . ?  
O147 W39 O141 72.1 (10) . . ?  
O152 W39 O141 82.2 (10) . . ?  
O153 W40 O152 104.7 (13) . . ?  
O153 W40 O150 104.4 (14) . . ?  
O152 W40 O150 93.0 (12) . . ?  
O153 W40 O148 99.0 (13) . . ?  
O152 W40 O148 91.0 (11) . . ?  
O150 W40 O148 154.4 (12) . . ?  
O153 W40 O149 96.8 (13) . . ?  
O152 W40 O149 157.9 (13) . . ?  
O150 W40 O149 86.6 (12) . . ?  
O148 W40 O149 80.4 (11) . . ?  
O153 W40 O142 165.3 (11) . . ?  
O152 W40 O142 86.6 (11) . . ?  
O150 W40 O142 84.0 (11) . . ?  
O148 W40 O142 71.0 (10) . . ?  
O149 W40 O142 71.3 (11) . . ?  
O118 W41 O115 102.8 (11) . . ?  
O118 W41 O127 101.7 (12) . . ?  
O115 W41 O127 91.6 (11) . . ?  
O118 W41 O194 93.5 (11) . . ?  
O115 W41 O194 100.0 (11) . . ?  
O127 W41 O194 158.4 (10) . . ?  
O118 W41 O192 159.9 (10) . . ?  
O115 W41 O192 95.1 (11) . . ?  
O127 W41 O192 86.7 (11) . . ?  
O194 W41 O192 74.2 (10) . . ?  
O118 W41 O128 85.2 (11) . . ?  
O115 W41 O128 169.0 (11) . . ?  
O127 W41 O128 79.3 (10) . . ?  
O194 W41 O128 86.8 (10) . . ?  
O192 W41 O128 78.3 (10) . . ?  
O118 W41 Ho5 128.6 (8) . . ?  
O115 W41 Ho5 95.6 (8) . . ?  
O127 W41 Ho5 125.6 (8) . . ?  
O194 W41 Ho5 35.6 (7) . . ?

O192 W41 Ho5 38.9(7) . . ?  
O128 W41 Ho5 84.9(7) . . ?  
O118 W41 Cs3 151.7(7) . . ?  
O115 W41 Cs3 53.9(8) . . ?  
O127 W41 Cs3 67.0(8) . . ?  
O194 W41 Cs3 105.4(7) . . ?  
O192 W41 Cs3 48.3(6) . . ?  
O128 W41 Cs3 116.0(7) . . ?  
Ho5 W41 Cs3 74.46(6) . . ?  
O159 W42 O158 107.8(12) . . ?  
O159 W42 O160 92.0(12) . . ?  
O158 W42 O160 103.5(12) . . ?  
O159 W42 O173 94.7(10) . . ?  
O158 W42 O173 91.0(10) . . ?  
O160 W42 O173 161.4(11) . . ?  
O159 W42 O178 167.1(11) . . ?  
O158 W42 O178 85.1(12) . . ?  
O160 W42 O178 84.9(12) . . ?  
O173 W42 O178 84.7(10) . . ?  
O159 W42 O176 91.1(11) . . ?  
O158 W42 O176 156.0(11) . . ?  
O160 W42 O176 90.1(10) . . ?  
O173 W42 O176 72.4(9) . . ?  
O178 W42 O176 76.4(10) . . ?  
O161 W43 O113 106.4(12) . . ?  
O161 W43 O162 96.0(11) . . ?  
O113 W43 O162 96.1(11) . . ?  
O161 W43 O160 91.6(12) . . ?  
O113 W43 O160 99.4(12) . . ?  
O162 W43 O160 160.1(12) . . ?  
O161 W43 O179 158.5(11) . . ?  
O113 W43 O179 94.7(12) . . ?  
O162 W43 O179 86.0(11) . . ?  
O160 W43 O179 80.3(12) . . ?  
O161 W43 O175 86.8(11) . . ?  
O113 W43 O175 165.4(11) . . ?  
O162 W43 O175 76.0(11) . . ?  
O160 W43 O175 86.0(11) . . ?  
O179 W43 O175 72.8(11) . . ?  
O161 W43 Cs2 127.2(8) . . ?  
O113 W43 Cs2 50.9(9) . . ?  
O162 W43 Cs2 129.1(7) . . ?  
O160 W43 Cs2 56.2(8) . . ?  
O179 W43 Cs2 63.9(8) . . ?  
O175 W43 Cs2 125.4(8) . . ?  
O161 W43 Cs3 58.5(8) . . ?  
O113 W43 Cs3 83.0(9) . . ?  
O162 W43 Cs3 45.8(8) . . ?  
O160 W43 Cs3 148.9(9) . . ?  
O179 W43 Cs3 130.6(8) . . ?  
O175 W43 Cs3 99.4(8) . . ?  
Cs2 W43 Cs3 133.85(8) . . ?  
O164 W44 O163 99.9(13) . . ?  
O164 W44 O165 100.7(13) . . ?  
O163 W44 O165 89.6(12) . . ?  
O164 W44 O162 102.5(12) . . ?  
O163 W44 O162 89.7(11) . . ?  
O165 W44 O162 156.6(12) . . ?  
O164 W44 O180 97.0(12) . . ?  
O163 W44 O180 163.0(11) . . ?  
O165 W44 O180 89.3(12) . . ?  
O162 W44 O180 84.6(11) . . ?  
O164 W44 O175 166.8(11) . . ?  
O163 W44 O175 91.9(11) . . ?

O165 W44 O175 85.2(11) . . ?  
O162 W44 O175 71.4(10) . . ?  
O180 W44 O175 71.1(10) . . ?  
O164 W44 Cs3 81.4(10) . . ?  
O163 W44 Cs3 47.6(8) . . ?  
O165 W44 Cs3 136.1(10) . . ?  
O162 W44 Cs3 52.1(8) . . ?  
O180 W44 Cs3 134.3(8) . . ?  
O175 W44 Cs3 102.7(7) . . ?  
O167 W45 O165 101.9(14) . . ?  
O167 W45 O166 101.6(14) . . ?  
O165 W45 O166 87.6(12) . . ?  
O167 W45 O168 98.6(14) . . ?  
O165 W45 O168 159.5(14) . . ?  
O166 W45 O168 88.2(12) . . ?  
O167 W45 O181 100.7(15) . . ?  
O165 W45 O181 85.8(13) . . ?  
O166 W45 O181 157.6(12) . . ?  
O168 W45 O181 90.5(13) . . ?  
O167 W45 O174 170.1(13) . . ?  
O165 W45 O174 85.6(12) . . ?  
O166 W45 O174 85.0(10) . . ?  
O168 W45 O174 74.0(12) . . ?  
O181 W45 O174 73.2(12) . . ?  
O373 W46 O182 101.1(14) . . ?  
O373 W46 O170 101.6(14) . . ?  
O182 W46 O170 92.1(14) . . ?  
O373 W46 O196 105.0(13) . . ?  
O182 W46 O196 153.8(12) . . ?  
O170 W46 O196 84.6(14) . . ?  
O373 W46 O168 96.9(14) . . ?  
O182 W46 O168 88.9(13) . . ?  
O170 W46 O168 160.9(13) . . ?  
O196 W46 O168 86.0(13) . . ?  
O373 W46 O174 167.7(12) . . ?  
O182 W46 O174 73.2(12) . . ?  
O170 W46 O174 89.6(11) . . ?  
O196 W46 O174 80.8(11) . . ?  
O168 W46 O174 72.4(11) . . ?  
O172 W47 O171 102.7(14) . . ?  
O172 W47 O173 106.0(13) . . ?  
O171 W47 O173 95.1(12) . . ?  
O172 W47 O170 104.1(14) . . ?  
O171 W47 O170 84.3(14) . . ?  
O173 W47 O170 149.3(11) . . ?  
O172 W47 O177 93.5(14) . . ?  
O171 W47 O177 162.1(12) . . ?  
O173 W47 O177 87.6(11) . . ?  
O170 W47 O177 84.4(12) . . ?  
O172 W47 O176 165.4(13) . . ?  
O171 W47 O176 91.4(11) . . ?  
O173 W47 O176 68.3(9) . . ?  
O170 W47 O176 81.1(10) . . ?  
O177 W47 O176 73.2(10) . . ?  
O188 W48 O184 101.2(14) . . ?  
O188 W48 O177 100.8(14) . . ?  
O184 W48 O177 157.4(13) . . ?  
O188 W48 O178 101.1(15) . . ?  
O184 W48 O178 87.9(12) . . ?  
O177 W48 O178 93.1(11) . . ?  
O188 W48 O185 103.3(15) . . ?  
O184 W48 O185 81.9(12) . . ?  
O177 W48 O185 88.0(10) . . ?  
O178 W48 O185 155.0(12) . . ?



O188 W48 O176 170.8(13) . . ?  
O184 W48 O176 85.2(11) . . ?  
O177 W48 O176 73.6(10) . . ?  
O178 W48 O176 72.4(10) . . ?  
O185 W48 O176 84.0(10) . . ?  
O187 W49 O180 101.0(12) . . ?  
O187 W49 O179 103.0(13) . . ?  
O180 W49 O179 91.6(13) . . ?  
O187 W49 O184 100.9(13) . . ?  
O180 W49 O184 156.3(12) . . ?  
O179 W49 O184 92.4(12) . . ?  
O187 W49 O183 101.7(12) . . ?  
O180 W49 O183 84.5(12) . . ?  
O179 W49 O183 155.3(12) . . ?  
O184 W49 O183 82.2(12) . . ?  
O187 W49 O175 172.8(12) . . ?  
O180 W49 O175 73.8(11) . . ?  
O179 W49 O175 72.5(11) . . ?  
O184 W49 O175 85.1(11) . . ?  
O183 W49 O175 83.0(11) . . ?  
O186 W50 O185 106.0(15) . . ?  
O186 W50 O183 105.0(14) . . ?  
O185 W50 O183 90.0(12) . . ?  
O186 W50 O181 96.6(15) . . ?  
O185 W50 O181 156.3(13) . . ?  
O183 W50 O181 90.9(12) . . ?  
O186 W50 O182 98.6(14) . . ?  
O185 W50 O182 86.4(12) . . ?  
O183 W50 O182 156.2(13) . . ?  
O181 W50 O182 83.2(12) . . ?  
O186 W50 O174 164.8(13) . . ?  
O185 W50 O174 84.2(12) . . ?  
O183 W50 O174 85.8(11) . . ?  
O181 W50 O174 72.3(12) . . ?  
O182 W50 O174 70.4(11) . . ?  
O193 W51 O195 98.6(12) . . ?  
O193 W51 O197 96.3(11) . . ?  
O195 W51 O197 102.0(11) . . ?  
O193 W51 O196 99.5(12) . . ?  
O195 W51 O196 96.9(12) . . ?  
O197 W51 O196 153.2(12) . . ?  
O193 W51 O171 85.1(12) . . ?  
O195 W51 O171 174.0(12) . . ?  
O197 W51 O171 82.2(11) . . ?  
O196 W51 O171 77.7(12) . . ?  
O193 W51 O198 173.5(12) . . ?  
O195 W51 O198 87.9(11) . . ?  
O197 W51 O198 82.4(10) . . ?  
O196 W51 O198 79.5(11) . . ?  
O171 W51 O198 88.4(11) . . ?  
O199 W52 O198 101.1(14) . . ?  
O199 W52 O200 100.4(15) . . ?  
O198 W52 O200 93.5(13) . . ?  
O199 W52 O134 104.7(14) . . ?  
O198 W52 O134 88.9(12) . . ?  
O200 W52 O134 153.8(15) . . ?  
O199 W52 O220 96.0(14) . . ?  
O198 W52 O220 162.9(14) . . ?  
O200 W52 O220 84.2(13) . . ?  
O134 W52 O220 85.9(13) . . ?  
O199 W52 O215 164.1(12) . . ?  
O198 W52 O215 92.0(12) . . ?  
O200 W52 O215 69.4(13) . . ?  
O134 W52 O215 84.4(12) . . ?

O220 W52 O215 71.3 (13) . . ?  
O213 W53 O219 103.6 (14) . . ?  
O213 W53 O134 100.2 (15) . . ?  
O219 W53 O134 89.8 (13) . . ?  
O213 W53 O197 103.8 (12) . . ?  
O219 W53 O197 152.6 (13) . . ?  
O134 W53 O197 84.3 (11) . . ?  
O213 W53 O212 98.0 (14) . . ?  
O219 W53 O212 87.8 (13) . . ?  
O134 W53 O212 161.7 (13) . . ?  
O197 W53 O212 89.5 (11) . . ?  
O213 W53 O214 169.7 (13) . . ?  
O219 W53 O214 74.7 (12) . . ?  
O134 W53 O214 90.0 (12) . . ?  
O197 W53 O214 78.6 (10) . . ?  
O212 W53 O214 71.8 (11) . . ?  
O210 W54 O211 102.4 (13) . . ?  
O210 W54 O209 102.1 (15) . . ?  
O211 W54 O209 92.4 (13) . . ?  
O210 W54 O212 98.9 (14) . . ?  
O211 W54 O212 91.0 (13) . . ?  
O209 W54 O212 157.5 (13) . . ?  
O210 W54 O218 92.6 (12) . . ?  
O211 W54 O218 164.8 (12) . . ?  
O209 W54 O218 86.8 (12) . . ?  
O212 W54 O218 84.2 (11) . . ?  
O210 W54 O214 163.3 (12) . . ?  
O211 W54 O214 92.2 (11) . . ?  
O209 W54 O214 85.0 (12) . . ?  
O212 W54 O214 72.6 (11) . . ?  
O218 W54 O214 72.6 (10) . . ?  
O210 W54 K3 52.3 (9) . 1\_455 ?  
O211 W54 K3 153.7 (9) . 1\_455 ?  
O209 W54 K3 87.1 (10) . 1\_455 ?  
O212 W54 K3 99.4 (8) . 1\_455 ?  
O218 W54 K3 41.4 (8) . 1\_455 ?  
O214 W54 K3 113.9 (6) . 1\_455 ?  
O210 W54 Cs4 51.7 (11) . 1\_455 ?  
O211 W54 Cs4 74.6 (10) . 1\_455 ?  
O209 W54 Cs4 60.9 (10) . 1\_455 ?  
O212 W54 Cs4 141.1 (8) . 1\_455 ?  
O218 W54 Cs4 117.7 (8) . 1\_455 ?  
O214 W54 Cs4 142.2 (7) . 1\_455 ?  
K3 W54 Cs4 82.3 (2) 1\_455 1\_455 ?  
O207 W55 O208 99.9 (15) . . ?  
O207 W55 O206 101.2 (17) . . ?  
O208 W55 O206 91.7 (14) . . ?  
O207 W55 O209 99.9 (16) . . ?  
O208 W55 O209 91.4 (13) . . ?  
O206 W55 O209 157.8 (15) . . ?  
O207 W55 O217 100.5 (13) . . ?  
O208 W55 O217 159.6 (14) . . ?  
O206 W55 O217 84.0 (12) . . ?  
O209 W55 O217 85.4 (11) . . ?  
O207 W55 O216 168.2 (13) . . ?  
O208 W55 O216 90.8 (12) . . ?  
O206 W55 O216 73.4 (13) . . ?  
O209 W55 O216 84.5 (12) . . ?  
O217 W55 O216 68.8 (10) . . ?  
O207 W55 Cs4 50.6 (12) . 1\_455 ?  
O208 W55 Cs4 74.4 (10) . 1\_455 ?  
O206 W55 Cs4 143.5 (11) . 1\_455 ?  
O209 W55 Cs4 58.1 (9) . 1\_455 ?  
O217 W55 Cs4 119.8 (8) . 1\_455 ?

O216 W55 Cs4 138.6(7) . 1\_455 ?  
O205 W56 O204 102.7(14) . . ?  
O205 W56 O203 100.9(16) . . ?  
O204 W56 O203 90.1(13) . . ?  
O205 W56 O206 99.3(16) . . ?  
O204 W56 O206 95.5(13) . . ?  
O203 W56 O206 157.3(14) . . ?  
O205 W56 O222 97.1(15) . . ?  
O204 W56 O222 160.1(14) . . ?  
O203 W56 O222 84.2(14) . . ?  
O206 W56 O222 83.2(14) . . ?  
O205 W56 O216 165.9(13) . . ?  
O204 W56 O216 89.5(11) . . ?  
O203 W56 O216 85.8(12) . . ?  
O206 W56 O216 72.2(13) . . ?  
O222 W56 O216 71.2(12) . . ?  
O202 W57 O201 105.0(15) . . ?  
O202 W57 O203 103.6(17) . . ?  
O201 W57 O203 91.3(14) . . ?  
O202 W57 O200 96.2(17) . . ?  
O201 W57 O200 93.2(14) . . ?  
O203 W57 O200 157.8(13) . . ?  
O202 W57 O221 95.4(15) . . ?  
O201 W57 O221 159.3(14) . . ?  
O203 W57 O221 87.0(13) . . ?  
O200 W57 O221 81.2(13) . . ?  
O202 W57 O215 162.9(15) . . ?  
O201 W57 O215 89.0(12) . . ?  
O203 W57 O215 85.4(13) . . ?  
O200 W57 O215 73.0(13) . . ?  
O221 W57 O215 70.3(12) . . ?  
O227 W58 O221 103.7(16) . . ?  
O227 W58 O220 99.1(16) . . ?  
O221 W58 O220 89.7(15) . . ?  
O227 W58 O224 99.2(14) . . ?  
O221 W58 O224 157.1(12) . . ?  
O220 W58 O224 87.3(13) . . ?  
O227 W58 O223 100.9(15) . . ?  
O221 W58 O223 90.6(15) . . ?  
O220 W58 O223 159.3(13) . . ?  
O224 W58 O223 84.4(13) . . ?  
O227 W58 O215 172.2(15) . . ?  
O221 W58 O215 71.2(13) . . ?  
O220 W58 O215 75.3(13) . . ?  
O224 W58 O215 86.1(11) . . ?  
O223 W58 O215 85.2(12) . . ?  
O226 W59 O225 102.8(14) . . ?  
O226 W59 O218 100.2(14) . . ?  
O225 W59 O218 94.5(13) . . ?  
O226 W59 O224 99.9(13) . . ?  
O225 W59 O224 87.1(13) . . ?  
O218 W59 O224 158.9(11) . . ?  
O226 W59 O219 99.6(14) . . ?  
O225 W59 O219 156.8(12) . . ?  
O218 W59 O219 87.4(12) . . ?  
O224 W59 O219 83.2(12) . . ?  
O226 W59 O214 169.5(13) . . ?  
O225 W59 O214 87.1(11) . . ?  
O218 W59 O214 75.2(10) . . ?  
O224 W59 O214 83.9(10) . . ?  
O219 W59 O214 71.0(11) . . ?  
O228 W60 O217 102.8(14) . . ?  
O228 W60 O222 102.4(15) . . ?  
O217 W60 O222 93.8(14) . . ?

O228 W60 O223 101.0(14) . . ?  
O217 W60 O223 154.5(12) . . ?  
O222 W60 O223 90.0(15) . . ?  
O228 W60 O225 100.3(13) . . ?  
O217 W60 O225 86.3(13) . . ?  
O222 W60 O225 156.7(13) . . ?  
O223 W60 O225 80.5(13) . . ?  
O228 W60 O216 172.5(13) . . ?  
O217 W60 O216 72.0(11) . . ?  
O222 W60 O216 73.0(12) . . ?  
O223 W60 O216 85.1(11) . . ?  
O225 W60 O216 85.0(10) . . ?  
O169 W61 O190 100.8(11) . . ?  
O169 W61 O307 98.6(11) . . ?  
O190 W61 O307 95.3(11) . . ?  
O169 W61 O166 87.9(11) . . ?  
O190 W61 O166 102.3(11) . . ?  
O307 W61 O166 159.7(9) . . ?  
O169 W61 O163 166.3(11) . . ?  
O190 W61 O163 86.7(10) . . ?  
O307 W61 O163 92.0(10) . . ?  
O166 W61 O163 79.3(10) . . ?  
O169 W61 O308 95.8(10) . . ?  
O190 W61 O308 161.6(9) . . ?  
O307 W61 O308 74.1(10) . . ?  
O166 W61 O308 86.2(10) . . ?  
O163 W61 O308 78.9(9) . . ?  
O169 W61 K2 51.9(8) . 2\_546 ?  
O190 W61 K2 150.6(7) . 2\_546 ?  
O307 W61 K2 99.2(8) . 2\_546 ?  
O166 W61 K2 69.8(7) . 2\_546 ?  
O163 W61 K2 118.1(7) . 2\_546 ?  
O308 W61 K2 47.7(6) . 2\_546 ?  
O169 W61 Cs3 145.2(9) . . ?  
O190 W61 Cs3 71.9(7) . . ?  
O307 W61 Cs3 50.2(7) . . ?  
O166 W61 Cs3 126.8(6) . . ?  
O163 W61 Cs3 48.1(8) . . ?  
O308 W61 Cs3 89.9(6) . . ?  
K2 W61 Cs3 136.04(17) 2\_546 . ?  
O306 W62 O262 101.9(14) . . ?  
O306 W62 O308 103.3(13) . . ?  
O262 W62 O308 90.1(13) . . ?  
O306 W62 O233 93.1(13) . . ?  
O262 W62 O233 105.4(14) . . ?  
O308 W62 O233 154.7(10) . . ?  
O306 W62 O307 92.5(11) . . ?  
O262 W62 O307 159.0(12) . . ?  
O308 W62 O307 71.5(10) . . ?  
O233 W62 O307 88.8(10) . . ?  
O306 W62 O234 170.0(13) . . ?  
O262 W62 O234 85.7(12) . . ?  
O308 W62 O234 83.0(10) . . ?  
O233 W62 O234 78.5(11) . . ?  
O307 W62 O234 82.0(9) . . ?  
O306 W62 K2 142.8(11) . 2\_546 ?  
O262 W62 K2 70.1(10) . 2\_546 ?  
O308 W62 K2 42.7(7) . 2\_546 ?  
O233 W62 K2 124.1(8) . 2\_546 ?  
O307 W62 K2 89.2(6) . 2\_546 ?  
O234 W62 K2 46.0(8) . 2\_546 ?  
O306 W62 Cs3 45.5(10) . . ?  
O262 W62 Cs3 144.8(10) . . ?  
O308 W62 Cs3 86.7(7) . . ?

O233 W62 Cs3 91.5(8) . . ?  
O307 W62 Cs3 47.1(6) . . ?  
O234 W62 Cs3 128.6(7) . . ?  
K2 W62 Cs3 124.96(19) 2\_546 . ?  
O248 W63 O254 97.2(13) . . ?  
O248 W63 O233 101.9(12) . . ?  
O254 W63 O233 160.9(12) . . ?  
O248 W63 O247 103.2(12) . . ?  
O254 W63 O247 86.8(12) . . ?  
O233 W63 O247 89.2(12) . . ?  
O248 W63 O309 100.3(12) . . ?  
O254 W63 O309 87.9(13) . . ?  
O233 W63 O309 88.4(12) . . ?  
O247 W63 O309 156.4(13) . . ?  
O248 W63 O363 167.9(12) . . ?  
O254 W63 O363 71.2(11) . . ?  
O233 W63 O363 89.7(11) . . ?  
O247 W63 O363 73.5(11) . . ?  
O309 W63 O363 83.0(11) . . ?  
O248 W63 Cs6 45.5(8) . . ?  
O254 W63 Cs6 81.1(8) . . ?  
O233 W63 Cs6 112.4(8) . . ?  
O247 W63 Cs6 143.6(9) . . ?  
O309 W63 Cs6 57.5(9) . . ?  
O363 W63 Cs6 132.4(6) . . ?  
O231 W64 O234 100.8(14) . . ?  
O231 W64 O309 105.9(14) . . ?  
O234 W64 O309 90.9(13) . . ?  
O231 W64 O235 97.5(13) . . ?  
O234 W64 O235 93.8(12) . . ?  
O309 W64 O235 154.8(13) . . ?  
O231 W64 O249 92.9(13) . . ?  
O234 W64 O249 166.3(12) . . ?  
O309 W64 O249 85.0(13) . . ?  
O235 W64 O249 84.7(11) . . ?  
O231 W64 O361 162.5(11) . . ?  
O234 W64 O361 93.4(11) . . ?  
O309 W64 O361 83.8(11) . . ?  
O235 W64 O361 71.3(10) . . ?  
O249 W64 O361 73.1(10) . . ?  
O231 W64 K2 81.4(11) . 2\_546 ?  
O234 W64 K2 46.8(10) . 2\_546 ?  
O309 W64 K2 137.3(10) . 2\_546 ?  
O235 W64 K2 54.7(8) . 2\_546 ?  
O249 W64 K2 137.4(8) . 2\_546 ?  
O361 W64 K2 101.5(7) . 2\_546 ?  
O237 W65 O236 107.7(13) . . ?  
O237 W65 O238 99.6(13) . . ?  
O236 W65 O238 94.4(13) . . ?  
O237 W65 O235 98.2(11) . . ?  
O236 W65 O235 92.5(12) . . ?  
O238 W65 O235 158.0(14) . . ?  
O237 W65 O250 94.2(11) . . ?  
O236 W65 O250 158.0(13) . . ?  
O238 W65 O250 84.1(13) . . ?  
O235 W65 O250 81.8(11) . . ?  
O237 W65 O361 164.1(10) . . ?  
O236 W65 O361 86.2(12) . . ?  
O238 W65 O361 86.7(12) . . ?  
O235 W65 O361 73.0(10) . . ?  
O250 W65 O361 71.8(10) . . ?  
O237 W65 K2 88.0(9) . 2\_546 ?  
O236 W65 K2 52.5(10) . 2\_546 ?  
O238 W65 K2 146.5(10) . 2\_546 ?

O235 W65 K2 46.8(8) . 2\_546 ?  
O250 W65 K2 128.1(8) . 2\_546 ?  
O361 W65 K2 94.9(7) . 2\_546 ?  
O240 W66 O239 104.5(14) . . ?  
O240 W66 O238 100.2(14) . . ?  
O239 W66 O238 90.9(13) . . ?  
O240 W66 O241 97.3(13) . . ?  
O239 W66 O241 95.2(11) . . ?  
O238 W66 O241 159.5(14) . . ?  
O240 W66 O251 93.4(13) . . ?  
O239 W66 O251 161.9(11) . . ?  
O238 W66 O251 83.1(13) . . ?  
O241 W66 O251 85.2(11) . . ?  
O240 W66 O362 166.0(14) . . ?  
O239 W66 O362 87.5(11) . . ?  
O238 W66 O362 86.6(12) . . ?  
O241 W66 O362 74.1(10) . . ?  
O251 W66 O362 75.1(10) . . ?  
O240 W66 K2 22.8(11) . . ?  
O239 W66 K2 90.7(9) . . ?  
O238 W66 K2 82.5(10) . . ?  
O241 W66 K2 117.0(8) . . ?  
O251 W66 K2 105.3(8) . . ?  
O362 W66 K2 168.9(7) . . ?  
O243 W67 O242 104.2(14) . . ?  
O243 W67 O241 104.8(14) . . ?  
O242 W67 O241 94.1(14) . . ?  
O243 W67 O244 103.3(15) . . ?  
O242 W67 O244 88.6(15) . . ?  
O241 W67 O244 150.1(13) . . ?  
O243 W67 O252 95.6(14) . . ?  
O242 W67 O252 159.4(13) . . ?  
O241 W67 O252 86.3(12) . . ?  
O244 W67 O252 81.2(14) . . ?  
O243 W67 O362 165.4(12) . . ?  
O242 W67 O362 89.8(11) . . ?  
O241 W67 O362 69.6(10) . . ?  
O244 W67 O362 80.6(12) . . ?  
O252 W67 O362 71.0(11) . . ?  
O246 W68 O253 98.3(17) . . ?  
O246 W68 O245 107.0(16) . . ?  
O253 W68 O245 154.5(12) . . ?  
O246 W68 O244 99.3(17) . . ?  
O253 W68 O244 85.9(14) . . ?  
O245 W68 O244 87.3(14) . . ?  
O246 W68 O247 98.0(17) . . ?  
O253 W68 O247 88.9(13) . . ?  
O245 W68 O247 90.3(12) . . ?  
O244 W68 O247 162.5(13) . . ?  
O246 W68 O363 167.5(15) . . ?  
O253 W68 O363 73.0(12) . . ?  
O245 W68 O363 82.4(10) . . ?  
O244 W68 O363 89.2(12) . . ?  
O247 W68 O363 73.3(11) . . ?  
O260 W69 O255 102.2(15) . . ?  
O260 W69 O257 103.5(16) . . ?  
O255 W69 O257 91.1(15) . . ?  
O260 W69 O254 97.5(15) . . ?  
O255 W69 O254 92.6(14) . . ?  
O257 W69 O254 157.4(13) . . ?  
O260 W69 O253 98.6(14) . . ?  
O255 W69 O253 159.2(15) . . ?  
O257 W69 O253 85.7(13) . . ?  
O254 W69 O253 82.9(12) . . ?

O260 W69 O363 167.6 (13) . . ?  
O255 W69 O363 85.7 (13) . . ?  
O257 W69 O363 85.7 (12) . . ?  
O254 W69 O363 72.3 (11) . . ?  
O253 W69 O363 73.6 (12) . . ?  
O258 W70 O252 101.2 (17) . . ?  
O258 W70 O251 102.6 (16) . . ?  
O252 W70 O251 92.4 (13) . . ?  
O258 W70 O256 100.3 (15) . . ?  
O252 W70 O256 156.7 (14) . . ?  
O251 W70 O256 91.6 (12) . . ?  
O258 W70 O257 100.1 (17) . . ?  
O252 W70 O257 86.4 (13) . . ?  
O251 W70 O257 157.1 (13) . . ?  
O256 W70 O257 81.1 (12) . . ?  
O258 W70 O362 175.0 (15) . . ?  
O252 W70 O362 75.5 (12) . . ?  
O251 W70 O362 74.2 (10) . . ?  
O256 W70 O362 83.6 (11) . . ?  
O257 W70 O362 83.4 (11) . . ?  
O259 W71 O250 101.8 (14) . . ?  
O259 W71 O256 103.9 (14) . . ?  
O250 W71 O256 95.2 (13) . . ?  
O259 W71 O249 96.3 (14) . . ?  
O250 W71 O249 91.8 (13) . . ?  
O256 W71 O249 156.7 (12) . . ?  
O259 W71 O255 101.0 (15) . . ?  
O250 W71 O255 157.1 (12) . . ?  
O256 W71 O255 78.5 (13) . . ?  
O249 W71 O255 86.5 (13) . . ?  
O259 W71 O361 169.9 (13) . . ?  
O250 W71 O361 73.5 (10) . . ?  
O256 W71 O361 85.6 (11) . . ?  
O249 W71 O361 75.2 (10) . . ?  
O255 W71 O361 84.1 (12) . . ?  
O302 W72 O261 98.2 (14) . . ?  
O302 W72 O245 96.9 (13) . . ?  
O261 W72 O245 101.8 (12) . . ?  
O302 W72 O284 100.8 (13) . . ?  
O261 W72 O284 88.9 (12) . . ?  
O245 W72 O284 157.8 (13) . . ?  
O302 W72 O242 172.5 (14) . . ?  
O261 W72 O242 86.1 (13) . . ?  
O245 W72 O242 76.1 (12) . . ?  
O284 W72 O242 85.4 (12) . . ?  
O302 W72 O281 90.1 (13) . . ?  
O261 W72 O281 168.7 (12) . . ?  
O245 W72 O281 84.6 (11) . . ?  
O284 W72 O281 82.0 (12) . . ?  
O242 W72 O281 86.5 (12) . . ?  
O282 W73 O281 102.4 (14) . . ?  
O282 W73 O283 104.3 (15) . . ?  
O281 W73 O283 88.4 (13) . . ?  
O282 W73 O280 103.1 (15) . . ?  
O281 W73 O280 91.8 (12) . . ?  
O283 W73 O280 151.9 (14) . . ?  
O282 W73 O291 93.5 (14) . . ?  
O281 W73 O291 163.6 (14) . . ?  
O283 W73 O291 83.6 (13) . . ?  
O280 W73 O291 88.6 (12) . . ?  
O282 W73 O289 165.9 (12) . . ?  
O281 W73 O289 91.3 (12) . . ?  
O283 W73 O289 79.3 (13) . . ?  
O280 W73 O289 72.6 (11) . . ?

O291 W73 O289 73.3 (12) . . ?  
O278 W74 O279 104.3 (13) . . ?  
O278 W74 O280 93.8 (13) . . ?  
O279 W74 O280 97.8 (13) . . ?  
O278 W74 O290 160.8 (13) . . ?  
O279 W74 O290 94.9 (12) . . ?  
O280 W74 O290 83.4 (11) . . ?  
O278 W74 O277 93.6 (13) . . ?  
O279 W74 O277 98.8 (13) . . ?  
O280 W74 O277 159.6 (12) . . ?  
O290 W74 O277 83.4 (11) . . ?  
O278 W74 O289 87.8 (11) . . ?  
O279 W74 O289 165.6 (12) . . ?  
O280 W74 O289 73.1 (11) . . ?  
O290 W74 O289 73.2 (10) . . ?  
O277 W74 O289 88.2 (11) . . ?  
O276 W75 O275 103.7 (14) . . ?  
O276 W75 O277 97.4 (15) . . ?  
O275 W75 O277 93.3 (14) . . ?  
O276 W75 O274 97.9 (14) . . ?  
O275 W75 O274 94.5 (12) . . ?  
O277 W75 O274 160.6 (11) . . ?  
O276 W75 O294 95.4 (12) . . ?  
O275 W75 O294 160.9 (13) . . ?  
O277 W75 O294 82.9 (12) . . ?  
O274 W75 O294 83.9 (10) . . ?  
O276 W75 O288 165.5 (12) . . ?  
O275 W75 O288 89.1 (12) . . ?  
O277 W75 O288 88.7 (12) . . ?  
O274 W75 O288 73.8 (10) . . ?  
O294 W75 O288 72.2 (9) . . ?  
O273 W76 O271 101.4 (16) . . ?  
O273 W76 O274 103.8 (14) . . ?  
O271 W76 O274 90.5 (12) . . ?  
O273 W76 O270 102.8 (15) . . ?  
O271 W76 O270 92.0 (13) . . ?  
O274 W76 O270 152.2 (12) . . ?  
O273 W76 O295 95.6 (14) . . ?  
O271 W76 O295 162.8 (14) . . ?  
O274 W76 O295 87.5 (10) . . ?  
O270 W76 O295 82.0 (11) . . ?  
O273 W76 O288 165.3 (12) . . ?  
O271 W76 O288 92.7 (13) . . ?  
O274 W76 O288 71.8 (10) . . ?  
O270 W76 O288 80.4 (12) . . ?  
O295 W76 O288 70.5 (10) . . ?  
O269 W77 O268 104.3 (14) . . ?  
O269 W77 O270 103.0 (15) . . ?  
O268 W77 O270 90.9 (13) . . ?  
O269 W77 O286 98.8 (15) . . ?  
O268 W77 O286 88.4 (14) . . ?  
O270 W77 O286 157.6 (15) . . ?  
O269 W77 O293 100.0 (14) . . ?  
O268 W77 O293 155.3 (14) . . ?  
O270 W77 O293 88.3 (13) . . ?  
O286 W77 O293 83.1 (14) . . ?  
O269 W77 O287 165.2 (13) . . ?  
O268 W77 O287 87.4 (12) . . ?  
O270 W77 O287 85.5 (12) . . ?  
O286 W77 O287 72.1 (13) . . ?  
O293 W77 O287 67.9 (12) . . ?  
O285 W78 O292 100.0 (14) . . ?  
O285 W78 O284 104.0 (13) . . ?  
O292 W78 O284 156.0 (13) . . ?



O285 W78 O283 103.2 (16) . . ?  
O292 W78 O283 87.4 (14) . . ?  
O284 W78 O283 87.7 (13) . . ?  
O285 W78 O286 97.5 (16) . . ?  
O292 W78 O286 90.6 (14) . . ?  
O284 W78 O286 85.8 (14) . . ?  
O283 W78 O286 159.3 (15) . . ?  
O285 W78 O287 168.0 (13) . . ?  
O292 W78 O287 73.2 (12) . . ?  
O284 W78 O287 83.1 (11) . . ?  
O283 W78 O287 86.6 (13) . . ?  
O286 W78 O287 73.1 (13) . . ?  
O299 W79 O293 102.7 (15) . . ?  
O299 W79 O298 99.8 (14) . . ?  
O293 W79 O298 156.4 (12) . . ?  
O299 W79 O297 101.8 (13) . . ?  
O293 W79 O297 94.5 (13) . . ?  
O298 W79 O297 87.8 (13) . . ?  
O299 W79 O292 100.7 (14) . . ?  
O293 W79 O292 82.2 (13) . . ?  
O298 W79 O292 86.7 (13) . . ?  
O297 W79 O292 157.4 (11) . . ?  
O299 W79 O287 171.1 (13) . . ?  
O293 W79 O287 72.0 (12) . . ?  
O298 W79 O287 84.7 (11) . . ?  
O297 W79 O287 85.9 (11) . . ?  
O292 W79 O287 71.8 (11) . . ?  
O301 W80 O290 101.9 (14) . . ?  
O301 W80 O296 96.7 (14) . . ?  
O290 W80 O296 92.8 (13) . . ?  
O301 W80 O291 103.8 (15) . . ?  
O290 W80 O291 90.4 (12) . . ?  
O296 W80 O291 158.1 (12) . . ?  
O301 W80 O298 101.2 (14) . . ?  
O290 W80 O298 156.9 (11) . . ?  
O296 W80 O298 82.8 (12) . . ?  
O291 W80 O298 85.9 (13) . . ?  
O301 W80 O289 175.4 (14) . . ?  
O290 W80 O289 74.9 (11) . . ?  
O296 W80 O289 86.8 (11) . . ?  
O291 W80 O289 73.0 (11) . . ?  
O298 W80 O289 82.2 (10) . . ?  
O300 W81 O294 102.5 (12) . . ?  
O300 W81 O295 101.7 (13) . . ?  
O294 W81 O295 93.1 (12) . . ?  
O300 W81 O296 99.1 (13) . . ?  
O294 W81 O296 91.6 (13) . . ?  
O295 W81 O296 157.2 (11) . . ?  
O300 W81 O297 98.6 (12) . . ?  
O294 W81 O297 158.5 (11) . . ?  
O295 W81 O297 86.3 (12) . . ?  
O296 W81 O297 81.3 (12) . . ?  
O300 W81 O288 174.9 (13) . . ?  
O294 W81 O288 75.6 (10) . . ?  
O295 W81 O288 73.9 (10) . . ?  
O296 W81 O288 85.7 (10) . . ?  
O297 W81 O288 83.7 (9) . . ?  
O265 W82 O272 107.0 (13) . . ?  
O265 W82 O268 93.2 (12) . . ?  
O272 W82 O268 114.7 (14) . . ?  
O265 W82 O266 97.0 (18) . . ?  
O272 W82 O266 92 (2) . . ?  
O268 W82 O266 147.3 (19) . . ?  
O265 W82 O271 170.6 (12) . . ?

O272 W82 O271 82.3(13) . . ?  
O268 W82 O271 82.6(12) . . ?  
O266 W82 O271 82.5(18) . . ?  
O265 W82 O267 93.6(19) . . ?  
O272 W82 O267 150(2) . . ?  
O268 W82 O267 86(2) . . ?  
O266 W82 O267 63(2) . . ?  
O271 W82 O267 77.9(19) . . ?

\_diffn\_measured\_fraction\_theta\_max 0.991  
\_diffn\_reflns\_theta\_full 25.35  
\_diffn\_measured\_fraction\_theta\_full 0.991  
\_refine\_diff\_density\_max 3.620  
\_refine\_diff\_density\_min -3.405  
\_refine\_diff\_density\_rms 0.519

data\_fh54

```
_audit_creation_method          SHELXL-97
_chemical_name_systematic
;
?
;
_chemical_name_common           ?
_chemical_melting_point         ?
_chemical_formula_moiety        ?
_chemical_formula_sum
'As16 Cs11.20 Gd16 K4 Na40 O777 W164'
_chemical_formula_weight        48862.71

loop_
  _atom_type_symbol
  _atom_type_description
  _atom_type_scatter_dispersion_real
  _atom_type_scatter_dispersion_imag
  _atom_type_scatter_source
'O' 'O' 0.0106 0.0060
'International Tables Vol C Tables 4.2.6.8 and 6.1.1.4'
'Na' 'Na' 0.0362 0.0249
'International Tables Vol C Tables 4.2.6.8 and 6.1.1.4'
'K' 'K' 0.2009 0.2494
'International Tables Vol C Tables 4.2.6.8 and 6.1.1.4'
'As' 'As' 0.0499 2.0058
'International Tables Vol C Tables 4.2.6.8 and 6.1.1.4'
'Cs' 'Cs' -0.3680 2.1192
'International Tables Vol C Tables 4.2.6.8 and 6.1.1.4'
'Gd' 'Gd' -0.1653 3.9035
'International Tables Vol C Tables 4.2.6.8 and 6.1.1.4'
'W' 'W' -0.8490 6.8722
'International Tables Vol C Tables 4.2.6.8 and 6.1.1.4'

_symmetry_space_group_name_H-M 'P -1'
_symmetry_cell_setting triclinic

loop_
  _symmetry_equiv_pos_as_xyz
  'x, y, z'
  '-x, -y, -z'

_cell_length_a 21.1358(3)
_cell_length_b 23.2411(3)
_cell_length_c 45.1923(6)
_cell_angle_alpha 81.3990(10)
_cell_angle_beta 83.0950(10)
_cell_angle_gamma 82.3930(10)
_cell_volume 21642.0(5)
_cell_formula_units_Z 1
_cell_measurement_temperature 183(2)
_cell_measurement_reflns_used 50977
_cell_measurement_theta_min 2.2066
_cell_measurement_theta_max 29.3084

_exptl_crystal_description block
_exptl_crystal_colour colorless
_exptl_crystal_size_max 0.11
_exptl_crystal_size_mid 0.10
_exptl_crystal_size_min 0.03
_exptl_crystal_density_meas ?
_exptl_crystal_density_diffrn 3.749
```

```
_exptl_crystal_density_method      'not measured'
_exptl_crystal_F_000               21036
_exptl_absorpt_coefficient_mu      24.108
_exptl_absorpt_correction_type     multi-scan
_exptl_absorpt_correction_T_min    0.55788
_exptl_absorpt_correction_T_max    1.00000
_exptl_absorpt_process_details
;
CrysAlis RED, Oxford Diffraction Ltd.,
Version 1.171.32.24 (release 21-04-2008 CrysAlis171 .NET)
(compiled Apr 21 2008,18:23:10)
Empirical absorption correction using spherical harmonics,
implemented in SCALE3 ABSPACK scaling algorithm.
;
_exptl_special_details
;
?
;

_diffrn_ambient_temperature        183(2)
_diffrn_radiation_wavelength       0.71073
_diffrn_radiation_type             MoK\alpha
_diffrn_radiation_source           'fine-focus sealed tube'
_diffrn_radiation_monochromator     graphite
_diffrn_measurement_device_type     'Xcalibur Ruby'
_diffrn_measurement_method         '/o oscillation scan'
_diffrn_detector_area_resol_mean   10.4498
_diffrn_standards_number           ?
_diffrn_standards_interval_count   ?
_diffrn_standards_interval_time    ?
_diffrn_standards_decay_%          ?
_diffrn_reflns_number              394103
_diffrn_reflns_av_R_equivalents    0.1467
_diffrn_reflns_av_sigmaI/netI     0.2235
_diffrn_reflns_limit_h_min         -25
_diffrn_reflns_limit_h_max         25
_diffrn_reflns_limit_k_min         -28
_diffrn_reflns_limit_k_max         28
_diffrn_reflns_limit_l_min         -55
_diffrn_reflns_limit_l_max         55
_diffrn_reflns_theta_min           2.21
_diffrn_reflns_theta_max           25.68
_reflns_number_total               81725
_reflns_number_gt                  42782
_reflns_threshold_expression       >2sigma(I)

_computing_data_collection         'CrysAlis RED (Oxford, 2007)'
_computing_cell_refinement         'CrysAlis RED (Oxford, 2007)'
_computing_data_reduction          'CrysAlis RED (Oxford, 2007)'
_computing_structure_solution      'SHELXS-97 (Sheldrick, 1990)'
_computing_structure_refinement    'SHELXL-97 (Sheldrick, 1997)'
_computing_molecular_graphics      'ORTEP-3 (Farrugia, 1997)'
_computing_publication_material    'SHELXL-97 (Sheldrick, 2008)'

_refine_special_details
;
Refinement of F2 against ALL reflections. The weighted R-factor
wR and
goodness of fit S are based on F2, conventional R-factors R are
based
on F, with F set to zero for negative F2. The threshold expression
of
F2 > 2sigma(F2) is used only for calculating R-factors(gt) etc.
and is
```

not relevant to the choice of reflections for refinement. R-factors based

on  $F^2$  are statistically about twice as large as those based on  $F$ , and R-

factors based on ALL data will be even larger.

;

```
_refine_ls_structure_factor_coef  Fsqd
_refine_ls_matrix_type            full
_refine_ls_weighting_scheme       calc
_refine_ls_weighting_details
'calc w=1/[\s^2^(Fo^2^)+(0.0726P)^2^+0.0000P] where P=(Fo^2^+2Fc^2
^)/3'
_atom_sites_solution_primary      direct
_atom_sites_solution_secondary    difmap
_refine_ls_extinction_method      none
_refine_ls_extinction_coef        ?
_refine_ls_number_reflns          81725
_refine_ls_number_parameters       2609
_refine_ls_number_restraints       0
_refine_ls_R_factor_all            0.1846
_refine_ls_R_factor_gt            0.0896
_refine_ls_wR_factor_ref           0.1871
_refine_ls_wR_factor_gt           0.1604
_refine_ls_goodness_of_fit_ref     1.002
_refine_ls_restrained_S_all        1.002
_refine_ls_shift/su_max            0.007
_refine_ls_shift/su_mean           0.000
```

loop\_

```
_atom_site_label
_atom_site_type_symbol
_atom_site_fract_x
_atom_site_fract_y
_atom_site_fract_z
_atom_site_U_iso_or_equiv
_atom_site_adp_type
_atom_site_occupancy
_atom_site_symmetry_multiplicity
_atom_site_calc_flag
_atom_site_refinement_flags
_atom_site_disorder_assembly
_atom_site_disorder_group
O1 O 0.6489(12) 0.1832(11) 0.0750(6) 0.038(7) Uiso 1 1 d . . .
O2 O 0.7258(13) 0.0210(12) 0.1466(6) 0.039(7) Uiso 1 1 d . . .
O3 O 0.5849(12) 0.1882(11) 0.1819(5) 0.031(6) Uiso 1 1 d . . .
O4 O 0.4096(11) 0.0417(10) 0.2402(5) 0.025(6) Uiso 1 1 d . . .
O5 O 0.5619(12) -0.1256(11) 0.2102(6) 0.036(7) Uiso 1 1 d . . .
O6 O 0.6249(11) -0.1311(10) 0.0875(5) 0.022(6) Uiso 1 1 d . . .
O7 O 0.5518(9) 0.0320(9) 0.0147(4) 0.010(5) Uiso 1 1 d . . .
O8 O 0.4027(12) 0.2326(11) 0.0491(5) 0.032(7) Uiso 1 1 d . . .
O9 O 0.3310(12) 0.2241(11) 0.1566(6) 0.036(7) Uiso 1 1 d . . .
O10 O 0.6368(11) 0.0750(10) 0.1066(5) 0.023(6) Uiso 1 1 d . . .
O11 O 0.6040(10) 0.0770(9) 0.1648(5) 0.014(5) Uiso 1 1 d . . .
O12 O 0.5587(10) 0.1631(9) 0.1264(5) 0.015(5) Uiso 1 1 d . . .
O13 O 0.5946(11) 0.0998(10) 0.0530(5) 0.022(6) Uiso 1 1 d . . .
O14 O 0.6606(12) -0.0404(11) 0.1145(5) 0.029(6) Uiso 1 1 d . . .
O15 O 0.6233(10) -0.0389(9) 0.1746(5) 0.014(5) Uiso 1 1 d . . .
O16 O 0.4996(11) 0.1044(10) 0.2027(5) 0.024(6) Uiso 1 1 d . . .
O17 O 0.4618(11) 0.1950(10) 0.1628(5) 0.026(6) Uiso 1 1 d . . .
O18 O 0.5212(11) 0.1923(10) 0.0717(5) 0.021(6) Uiso 1 1 d . . .
O19 O 0.4722(11) 0.1217(10) 0.0406(5) 0.021(6) Uiso 1 1 d . . .
O20 O 0.5778(11) -0.0125(10) 0.0744(5) 0.023(6) Uiso 1 1 d . . .
O21 O 0.5826(11) -0.1143(10) 0.1467(5) 0.024(6) Uiso 1 1 d . . .
```

O22 O 0.5059(11) -0.0082(10) 0.1988(5) 0.026(6) Uiso 1 1 d . . . .  
O23 O 0.3773(10) 0.1241(9) 0.1909(5) 0.014(5) Uiso 1 1 d . . . .  
O24 O 0.4194(10) 0.1898(9) 0.1109(5) 0.014(5) Uiso 1 1 d . . . .  
O25 O 0.4680(9) 0.0894(9) 0.1542(4) 0.008(5) Uiso 1 1 d . . . .  
O26 O 0.5427(11) -0.0066(10) 0.1349(5) 0.022(6) Uiso 1 1 d . . . .  
O27 O 0.5006(10) 0.0897(10) 0.0945(5) 0.019(6) Uiso 1 1 d . . . .  
O28 O 0.4563(9) 0.0086(9) 0.0627(4) 0.009(5) Uiso 1 1 d . . . .  
O29 O 0.4997(10) -0.0860(9) 0.1026(5) 0.014(5) Uiso 1 1 d . . . .  
O30 O 0.4647(11) -0.0906(10) 0.1728(5) 0.020(6) Uiso 1 1 d . . . .  
O31 O 0.3796(11) 0.0069(10) 0.1881(5) 0.024(6) Uiso 1 1 d . . . .  
O32 O 0.3404(10) 0.1135(10) 0.1384(5) 0.018(5) Uiso 1 1 d . . . .  
O33 O 0.3667(11) 0.1277(10) 0.0805(5) 0.024(6) Uiso 1 1 d . . . .  
O34 O 0.3408(10) 0.0179(9) 0.1048(5) 0.018(5) Uiso 1 1 d . . . .  
O35 O 0.2356(10) 0.0631(9) 0.1362(5) 0.017(5) Uiso 1 1 d . . . .  
O36 O 0.3364(11) -0.0295(11) 0.0428(5) 0.028(6) Uiso 1 1 d . . . .  
O37 O 0.3728(11) -0.0864(10) 0.1400(5) 0.022(6) Uiso 1 1 d . . . .  
O38 O 0.4533(13) -0.1031(12) 0.0413(6) 0.040(7) Uiso 1 1 d . . . .  
O39 O 0.2418(11) 0.1719(11) 0.1087(5) 0.028(6) Uiso 1 1 d . . . .  
O40 O 0.2559(10) 0.0919(10) 0.0727(5) 0.018(5) Uiso 1 1 d . . . .  
O41 O 0.2097(9) 0.1986(8) 0.0536(4) 0.007(5) Uiso 1 1 d . . . .  
O42 O 0.1344(11) 0.2375(10) 0.1293(5) 0.025(6) Uiso 1 1 d . . . .  
O43 O 0.0016(10) 0.1350(9) 0.1431(4) 0.011(5) Uiso 1 1 d . . . .  
O44 O -0.0249(12) -0.0106(11) 0.1240(5) 0.031(6) Uiso 1 1 d . . . .  
O45 O 0.0791(9) -0.0098(8) 0.0500(4) 0.007(5) Uiso 1 1 d . . . .  
O46 O 0.2355(9) 0.0534(9) 0.0234(4) 0.010(5) Uiso 1 1 d . . . .  
O47 O 0.1356(9) 0.0972(9) 0.0532(4) 0.009(5) Uiso 1 1 d . . . .  
O48 O 0.1012(11) 0.1651(10) 0.0965(5) 0.023(6) Uiso 1 1 d . . . .  
O49 O 0.0407(11) 0.0700(10) 0.0952(5) 0.020(6) Uiso 1 1 d . . . .  
O50 O 0.2256(14) 0.2877(12) 0.0878(6) 0.047(8) Uiso 1 1 d . . . .  
O51 O 0.0343(12) 0.2216(11) 0.1741(6) 0.038(7) Uiso 1 1 d . . . .  
O52 O 0.1208(11) 0.1273(10) 0.1591(5) 0.027(6) Uiso 1 1 d . . . .  
O53 O 0.0575(10) 0.0278(9) 0.1573(5) 0.015(5) Uiso 1 1 d . . . .  
O54 O -0.0737(11) 0.0497(10) 0.1724(5) 0.025(6) Uiso 1 1 d . . . .  
O55 O 0.0954(11) -0.0575(10) 0.1059(5) 0.023(6) Uiso 1 1 d . . . .  
O56 O -0.0040(12) -0.0865(11) 0.0801(5) 0.031(7) Uiso 1 1 d . . . .  
O57 O 0.1922(10) -0.0184(9) 0.0724(4) 0.011(5) Uiso 1 1 d . . . .  
O58 O 0.1865(10) -0.0466(10) 0.0132(5) 0.018(5) Uiso 1 1 d . . . .  
O59 O 0.3059(13) 0.1507(12) 0.0165(6) 0.039(7) Uiso 1 1 d . . . .  
O60 O 0.1747(9) 0.1597(8) 0.0064(4) 0.006(5) Uiso 1 1 d . . . .  
O61 O 0.1097(11) 0.2717(11) 0.0711(5) 0.029(6) Uiso 1 1 d . . . .  
O62 O 0.0140(14) 0.2449(13) 0.1121(6) 0.048(8) Uiso 1 1 d . . . .  
O63 O -0.0781(11) 0.0957(10) 0.1117(5) 0.023(6) Uiso 1 1 d . . . .  
O64 O -0.0418(11) 0.0296(10) 0.0669(5) 0.024(6) Uiso 1 1 d . . . .  
O65 O 0.1202(10) 0.0673(10) 0.0037(5) 0.019(6) Uiso 1 1 d . . . .  
O66 O 0.0118(11) 0.1142(10) 0.0329(5) 0.022(6) Uiso 1 1 d . . . .  
O67 O -0.0251(10) 0.1820(9) 0.0728(5) 0.016(5) Uiso 1 1 d . . . .  
O68 O 0.0688(10) 0.2084(10) 0.0354(5) 0.019(6) Uiso 1 1 d . . . .  
O69 O -0.1203(12) 0.1310(11) 0.0544(5) 0.031(6) Uiso 1 1 d . . . .  
O70 O 0.0622(11) 0.1760(10) -0.0200(5) 0.028(6) Uiso 1 1 d . . . .  
O71 O -0.0141(15) 0.3029(14) 0.0572(7) 0.058(9) Uiso 1 1 d . . . .  
O72 O 0.2836(11) -0.0850(10) 0.1021(5) 0.022(6) Uiso 1 1 d . . . .  
O73 O 0.1843(10) -0.0332(9) 0.1370(5) 0.017(5) Uiso 1 1 d . . . .  
O74 O 0.1042(11) 0.0614(10) 0.2177(5) 0.025(6) Uiso 1 1 d . . . .  
O75 O 0.2323(13) 0.0904(12) 0.1938(6) 0.042(7) Uiso 1 1 d . . . .  
O76 O 0.2588(12) -0.0323(11) 0.1901(6) 0.035(7) Uiso 1 1 d . . . .  
O77 O 0.3862(11) -0.1671(10) 0.0897(5) 0.023(6) Uiso 1 1 d . . . .  
O78 O 0.3178(10) -0.2387(9) 0.0594(4) 0.011(5) Uiso 1 1 d . . . .  
O79 O 0.2221(11) -0.1904(10) 0.0225(5) 0.023(6) Uiso 1 1 d . . . .  
O80 O 0.1998(10) -0.2554(9) 0.0804(4) 0.011(5) Uiso 1 1 d . . . .  
O81 O 0.1875(11) -0.3038(10) 0.0327(5) 0.023(6) Uiso 1 1 d . . . .  
O82 O 0.1528(11) -0.3741(10) 0.0824(5) 0.025(6) Uiso 1 1 d . . . .  
O83 O 0.1320(10) -0.4015(9) 0.0246(5) 0.016(5) Uiso 1 1 d . . . .  
O84 O 0.2228(10) -0.4630(9) 0.0613(5) 0.013(5) Uiso 1 1 d . . . .  
O85 O 0.1641(10) -0.4718(10) 0.1164(5) 0.019(6) Uiso 1 1 d . . . .

O86 O 0.2065(11) -0.5798(10) 0.0964(5) 0.020(6) Uiso 1 1 d . . . .  
O87 O 0.2727(12) -0.5353(11) 0.1365(5) 0.030(6) Uiso 1 1 d . . . .  
O88 O 0.2640(10) -0.4393(9) 0.1665(5) 0.015(5) Uiso 1 1 d . . . .  
O89 O 0.3497(11) -0.5348(10) 0.1818(5) 0.022(6) Uiso 1 1 d . . . .  
O90 O 0.3832(10) -0.4274(9) 0.1488(5) 0.015(5) Uiso 1 1 d . . . .  
O91 O 0.3096(11) -0.3318(11) 0.1645(5) 0.028(6) Uiso 1 1 d . . . .  
O92 O 0.4341(10) -0.3455(9) 0.1785(5) 0.014(5) Uiso 1 1 d . . . .  
O93 O 0.3949(10) -0.2623(9) 0.1315(4) 0.012(5) Uiso 1 1 d . . . .  
O94 O 0.4356(10) -0.2713(9) 0.0734(5) 0.016(5) Uiso 1 1 d . . . .  
O95 O 0.3087(10) -0.2937(9) 0.0118(4) 0.011(5) Uiso 1 1 d . . . .  
O96 O 0.2628(9) -0.3908(9) 0.0141(4) 0.010(5) Uiso 1 1 d . . . .  
O97 O 0.3209(10) -0.5382(9) 0.0796(5) 0.015(5) Uiso 1 1 d . . . .  
O98 O 0.3952(10) -0.5204(10) 0.1199(5) 0.020(6) Uiso 1 1 d . . . .  
O99 O 0.4681(9) -0.3596(9) 0.1170(4) 0.010(5) Uiso 1 1 d . . . .  
O100 O 0.3052(10) -0.4425(9) 0.1049(4) 0.012(5) Uiso 1 1 d . . . .  
O101 O 0.2757(10) -0.3537(9) 0.0616(4) 0.012(5) Uiso 1 1 d . . . .  
O102 O 0.3524(10) -0.3344(9) 0.1026(5) 0.015(5) Uiso 1 1 d . . . .  
O103 O 0.3653(10) -0.4479(9) 0.0430(4) 0.011(5) Uiso 1 1 d . . . .  
O104 O 0.4082(11) -0.3490(10) 0.0417(5) 0.022(6) Uiso 1 1 d . . . .  
O105 O 0.4378(11) -0.4339(10) 0.0814(5) 0.025(6) Uiso 1 1 d . . . .  
O106 O 0.4543(11) -0.5458(10) 0.0636(5) 0.024(6) Uiso 1 1 d . . . .  
O107 O 0.3871(12) -0.3801(11) -0.0129(5) 0.032(7) Uiso 1 1 d . . . .  
O108 O 0.5338(10) -0.3607(10) 0.0619(5) 0.019(5) Uiso 1 1 d . . . .  
O109 O 0.1776(10) -0.1464(9) 0.1343(4) 0.011(5) Uiso 1 1 d . . . .  
O110 O 0.1864(10) -0.1385(9) 0.0804(4) 0.010(5) Uiso 1 1 d . . . .  
O111 O 0.1821(9) -0.2657(8) 0.1456(4) 0.006(5) Uiso 1 1 d . . . .  
O112 O 0.2478(11) -0.3959(10) 0.2267(5) 0.020(6) Uiso 1 1 d . . . .  
O113 O 0.2109(11) -0.2761(10) 0.2141(5) 0.023(6) Uiso 1 1 d . . . .  
O114 O 0.1498(10) -0.3744(9) 0.1440(5) 0.014(5) Uiso 1 1 d . . . .  
O115 O 0.0973(10) -0.3199(9) 0.2028(4) 0.012(5) Uiso 1 1 d . . . .  
O116 O -0.0391(10) -0.1560(10) 0.1402(5) 0.018(5) Uiso 1 1 d . . . .  
O117 O 0.0453(10) -0.3314(9) 0.1153(5) 0.013(5) Uiso 1 1 d . . . .  
O118 O 0.0100(10) -0.2764(9) 0.1625(5) 0.016(5) Uiso 1 1 d . . . .  
O119 O -0.0069(10) -0.5136(9) 0.1240(5) 0.013(5) Uiso 1 1 d . . . .  
O120 O 0.0902(10) -0.2073(9) 0.1121(5) 0.012(5) Uiso 1 1 d . . . .  
O121 O 0.0487(11) -0.2465(10) 0.0636(5) 0.023(6) Uiso 1 1 d . . . .  
O122 O -0.0788(10) -0.1715(9) 0.0803(5) 0.017(5) Uiso 1 1 d . . . .  
O123 O -0.1189(10) -0.2462(9) 0.1367(5) 0.014(5) Uiso 1 1 d . . . .  
O124 O -0.0677(11) -0.2993(10) 0.0876(5) 0.024(6) Uiso 1 1 d . . . .  
O125 O 0.0439(11) -0.4273(10) 0.0914(5) 0.023(6) Uiso 1 1 d . . . .  
O126 O 0.0538(10) -0.4436(9) 0.1499(5) 0.013(5) Uiso 1 1 d . . . .  
O127 O -0.0033(9) -0.3811(8) 0.2046(4) 0.006(5) Uiso 1 1 d . . . .  
O128 O -0.0871(9) -0.2919(8) 0.2053(4) 0.003(4) Uiso 1 1 d . . . .  
O129 O -0.1898(10) -0.2938(9) 0.2482(5) 0.016(5) Uiso 1 1 d . . . .  
O130 O -0.1201(11) -0.3951(11) 0.2264(5) 0.029(6) Uiso 1 1 d . . . .  
O131 O -0.0191(11) -0.4595(10) 0.2580(5) 0.020(6) Uiso 1 1 d . . . .  
O132 O 0.0232(10) -0.4968(10) 0.2035(5) 0.018(5) Uiso 1 1 d . . . .  
O133 O 0.0823(12) -0.5685(11) 0.1618(5) 0.030(6) Uiso 1 1 d . . . .  
O134 O -0.1626(11) 0.0184(10) 0.3390(5) 0.028(6) Uiso 1 1 d . . . .  
O135 O 0.0149(13) -0.5112(12) 0.0603(6) 0.040(7) Uiso 1 1 d . . . .  
O136 O -0.0630(10) -0.4015(10) 0.0615(5) 0.019(6) Uiso 1 1 d . . . .  
O137 O -0.1507(11) -0.3028(11) 0.0472(5) 0.028(6) Uiso 1 1 d . . . .  
O138 O -0.1877(11) -0.3071(10) 0.1093(5) 0.024(6) Uiso 1 1 d . . . .  
O139 O -0.2460(11) -0.2047(10) 0.1313(5) 0.025(6) Uiso 1 1 d . . . .  
O140 O -0.2063(10) -0.2582(9) 0.1865(4) 0.012(5) Uiso 1 1 d . . . .  
O141 O -0.1560(10) -0.3558(9) 0.1675(5) 0.015(5) Uiso 1 1 d . . . .  
O142 O -0.0718(12) -0.4505(11) 0.1755(6) 0.036(7) Uiso 1 1 d . . . .  
O143 O -0.0982(10) -0.4104(9) 0.1175(5) 0.017(5) Uiso 1 1 d . . . .  
O144 O -0.1033(12) -0.4996(11) 0.0913(5) 0.031(7) Uiso 1 1 d . . . .  
O145 O -0.1872(11) -0.4021(10) 0.0840(5) 0.025(6) Uiso 1 1 d . . . .  
O146 O -0.2683(11) -0.3191(10) 0.1565(5) 0.022(6) Uiso 1 1 d . . . .  
O147 O -0.2398(10) -0.3615(9) 0.2135(5) 0.017(5) Uiso 1 1 d . . . .  
O148 O -0.0966(11) -0.5089(10) 0.2249(5) 0.024(6) Uiso 1 1 d . . . .  
O149 O -0.0486(10) -0.5616(10) 0.1792(5) 0.018(5) Uiso 1 1 d . . . .

O150 O -0.1480(11) -0.5155(10) 0.1495(5) 0.025(6) Uiso 1 1 d . . . .  
O151 O -0.2330(11) -0.4257(10) 0.1419(5) 0.026(6) Uiso 1 1 d . . . .  
O152 O -0.2024(11) -0.4639(10) 0.1956(5) 0.028(6) Uiso 1 1 d . . . .  
O153 O -0.1691(12) -0.5844(11) 0.2064(6) 0.037(7) Uiso 1 1 d . . . .  
O154 O -0.3305(11) -0.4122(11) 0.1890(5) 0.028(6) Uiso 1 1 d . . . .  
O155 O -0.2334(13) -0.5110(12) 0.1041(6) 0.044(8) Uiso 1 1 d . . . .  
O156 O 0.1442(9) -0.4359(8) 0.2035(4) 0.006(5) Uiso 1 1 d . . . .  
O157 O 0.2791(11) -0.2187(10) 0.1132(5) 0.025(6) Uiso 1 1 d . . . .  
O158 O 0.1269(10) -0.0584(9) 0.2047(4) 0.012(5) Uiso 1 1 d . . . .  
O159 O 0.0607(10) -0.1321(9) 0.2463(5) 0.013(5) Uiso 1 1 d . . . .  
O160 O 0.1827(11) -0.1662(10) 0.2364(5) 0.022(6) Uiso 1 1 d . . . .  
O161 O 0.1091(10) -0.2500(9) 0.2568(5) 0.013(5) Uiso 1 1 d . . . .  
O162 O 0.2138(10) -0.3240(9) 0.2735(5) 0.015(5) Uiso 1 1 d . . . .  
O163 O 0.1211(11) -0.3319(10) 0.3198(5) 0.020(6) Uiso 1 1 d . . . .  
O164 O 0.2380(9) -0.3987(9) 0.3290(4) 0.009(5) Uiso 1 1 d . . . .  
O165 O 0.1967(11) -0.2971(11) 0.3548(5) 0.029(6) Uiso 1 1 d . . . .  
O166 O 0.0719(10) -0.2693(9) 0.3619(5) 0.015(5) Uiso 1 1 d . . . .  
O167 O 0.1359(13) -0.3043(12) 0.4143(6) 0.042(7) Uiso 1 1 d . . . .  
O168 O 0.0846(10) -0.1888(10) 0.3979(5) 0.019(6) Uiso 1 1 d . . . .  
O169 O -0.0417(9) -0.3091(9) 0.3689(4) 0.010(5) Uiso 1 1 d . . . .  
O170 O 0.0901(11) -0.0515(10) 0.3422(5) 0.021(6) Uiso 1 1 d . . . .  
O171 O -0.0018(10) -0.0542(9) 0.3103(4) 0.011(5) Uiso 1 1 d . . . .  
O172 O 0.0436(14) 0.0524(12) 0.3018(6) 0.047(8) Uiso 1 1 d . . . .  
O173 O 0.0800(9) -0.0278(9) 0.2586(4) 0.009(5) Uiso 1 1 d . . . .  
O174 O 0.1495(10) -0.1727(10) 0.3443(5) 0.018(5) Uiso 1 1 d . . . .  
O175 O 0.1913(11) -0.2269(10) 0.2963(5) 0.021(6) Uiso 1 1 d . . . .  
O176 O 0.1344(11) -0.1125(10) 0.2903(5) 0.021(6) Uiso 1 1 d . . . .  
O177 O 0.1623(10) -0.0076(9) 0.2967(5) 0.017(5) Uiso 1 1 d . . . .  
O178 O 0.2064(10) -0.0599(9) 0.2471(5) 0.014(5) Uiso 1 1 d . . . .  
O179 O 0.2843(11) -0.2359(10) 0.2549(5) 0.020(6) Uiso 1 1 d . . . .  
O180 O 0.2913(10) -0.2963(9) 0.3097(4) 0.010(5) Uiso 1 1 d . . . .  
O181 O 0.2134(11) -0.2170(10) 0.3878(5) 0.025(6) Uiso 1 1 d . . . .  
O182 O 0.1638(11) -0.1067(10) 0.3820(5) 0.021(6) Uiso 1 1 d . . . .  
O183 O 0.2817(11) -0.1996(10) 0.3346(5) 0.022(6) Uiso 1 1 d . . . .  
O184 O 0.2772(9) -0.1378(9) 0.2818(4) 0.008(5) Uiso 1 1 d . . . .  
O185 O 0.2337(12) -0.0884(11) 0.3285(5) 0.030(6) Uiso 1 1 d . . . .  
O186 O 0.3001(13) -0.1352(12) 0.3787(6) 0.047(8) Uiso 1 1 d . . . .  
O187 O 0.3839(10) -0.2229(9) 0.2862(5) 0.016(5) Uiso 1 1 d . . . .  
O188 O 0.2939(12) -0.0184(11) 0.2792(6) 0.033(7) Uiso 1 1 d . . . .  
O189 O -0.0790(11) -0.1287(10) 0.2424(5) 0.027(6) Uiso 1 1 d . . . .  
O190 O 0.0046(9) -0.2770(9) 0.3093(4) 0.009(5) Uiso 1 1 d . . . .  
O191 O -0.1139(11) -0.2342(10) 0.2776(5) 0.026(6) Uiso 1 1 d . . . .  
O192 O -0.0066(9) -0.3083(9) 0.2473(4) 0.010(5) Uiso 1 1 d . . . .  
O193 O -0.0260(10) -0.1568(9) 0.3006(5) 0.014(5) Uiso 1 1 d . . . .  
O194 O 0.0078(10) -0.2191(9) 0.2106(5) 0.017(5) Uiso 1 1 d . . . .  
O195 O -0.0991(10) -0.1782(9) 0.3534(4) 0.010(5) Uiso 1 1 d . . . .  
O196 O 0.0164(10) -0.1330(9) 0.3536(5) 0.017(5) Uiso 1 1 d . . . .  
O197 O -0.1231(10) -0.0728(9) 0.3124(5) 0.017(5) Uiso 1 1 d . . . .  
O198 O -0.0909(10) -0.0692(9) 0.3646(5) 0.016(5) Uiso 1 1 d . . . .  
O199 O -0.0959(13) 0.0337(12) 0.3881(6) 0.041(7) Uiso 1 1 d . . . .  
O200 O -0.1614(11) -0.0575(10) 0.4193(5) 0.025(6) Uiso 1 1 d . . . .  
O201 O -0.1707(12) -0.1693(11) 0.4106(5) 0.031(7) Uiso 1 1 d . . . .  
O202 O -0.2222(13) -0.1301(12) 0.4635(6) 0.045(8) Uiso 1 1 d . . . .  
O203 O -0.2962(12) -0.1504(11) 0.4188(5) 0.031(7) Uiso 1 1 d . . . .  
O204 O -0.2491(11) -0.2350(10) 0.3883(5) 0.026(6) Uiso 1 1 d . . . .  
O205 O -0.3592(14) -0.2527(13) 0.4265(6) 0.049(8) Uiso 1 1 d . . . .  
O206 O -0.3659(12) -0.2245(11) 0.3649(6) 0.035(7) Uiso 1 1 d . . . .  
O207 O -0.3937(13) -0.2214(12) 0.3048(6) 0.045(8) Uiso 1 1 d . . . .  
O208 O -0.2711(12) -0.2250(11) 0.3194(6) 0.036(7) Uiso 1 1 d . . . .  
O209 O -0.3307(11) -0.1199(10) 0.2929(5) 0.025(6) Uiso 1 1 d . . . .  
O210 O -0.2716(13) -0.0786(12) 0.2360(6) 0.041(7) Uiso 1 1 d . . . .  
O211 O -0.2020(10) -0.1410(10) 0.2789(5) 0.018(5) Uiso 1 1 d . . . .  
O212 O -0.1955(11) -0.0275(10) 0.2668(5) 0.027(6) Uiso 1 1 d . . . .  
O213 O -0.1112(13) 0.0463(12) 0.2805(6) 0.043(7) Uiso 1 1 d . . . .



|      |   |              |              |             |            |      |      |   |   |   |   |   |   |
|------|---|--------------|--------------|-------------|------------|------|------|---|---|---|---|---|---|
| O214 | O | -0.2524 (11) | -0.0520 (10) | 0.3182 (5)  | 0.027 (6)  | Uiso | 1    | 1 | d | . | . | . | . |
| O215 | O | -0.2349 (12) | -0.0663 (11) | 0.3782 (5)  | 0.031 (7)  | Uiso | 1    | 1 | d | . | . | . | . |
| O216 | O | -0.3130 (10) | -0.1315 (9)  | 0.3564 (5)  | 0.016 (5)  | Uiso | 1    | 1 | d | . | . | . | . |
| O217 | O | -0.4211 (11) | -0.1239 (10) | 0.3385 (5)  | 0.022 (6)  | Uiso | 1    | 1 | d | . | . | . | . |
| O218 | O | -0.3218 (11) | -0.0044 (10) | 0.2767 (5)  | 0.025 (6)  | Uiso | 1    | 1 | d | . | . | . | . |
| O219 | O | -0.2458 (11) | 0.0576 (10)  | 0.2984 (5)  | 0.025 (6)  | Uiso | 1    | 1 | d | . | . | . | . |
| O220 | O | -0.2286 (12) | 0.0382 (11)  | 0.3921 (5)  | 0.032 (7)  | Uiso | 1    | 1 | d | . | . | . | . |
| O221 | O | -0.2883 (12) | -0.0404 (11) | 0.4282 (6)  | 0.034 (7)  | Uiso | 1    | 1 | d | . | . | . | . |
| O222 | O | -0.4097 (16) | -0.1426 (15) | 0.3973 (7)  | 0.068 (10) | Uiso | 1    | 1 | d | . | . | . | . |
| O223 | O | -0.3744 (12) | -0.0357 (11) | 0.3876 (6)  | 0.033 (7)  | Uiso | 1    | 1 | d | . | . | . | . |
| O224 | O | -0.3120 (12) | 0.0408 (11)  | 0.3504 (6)  | 0.038 (7)  | Uiso | 1    | 1 | d | . | . | . | . |
| O225 | O | -0.3888 (12) | -0.0200 (11) | 0.3335 (5)  | 0.032 (7)  | Uiso | 1    | 1 | d | . | . | . | . |
| O226 | O | -0.3773 (14) | 0.0923 (12)  | 0.3026 (6)  | 0.048 (8)  | Uiso | 1    | 1 | d | . | . | . | . |
| O227 | O | -0.3558 (14) | 0.0680 (13)  | 0.4109 (7)  | 0.054 (9)  | Uiso | 1    | 1 | d | . | . | . | . |
| O228 | O | -0.4955 (14) | -0.0495 (13) | 0.3740 (7)  | 0.052 (8)  | Uiso | 1    | 1 | d | . | . | . | . |
| O229 | O | -0.1602 (11) | -0.2673 (10) | 0.3376 (5)  | 0.021 (6)  | Uiso | 1    | 1 | d | . | . | . | . |
| O230 | O | -0.1487 (14) | -0.2951 (13) | 0.4400 (7)  | 0.056 (9)  | Uiso | 1    | 1 | d | . | . | . | . |
| O231 | O | -0.1565 (11) | -0.3526 (10) | 0.3911 (5)  | 0.021 (6)  | Uiso | 1    | 1 | d | . | . | . | . |
| O232 | O | -0.0430 (12) | -0.2344 (11) | 0.4091 (5)  | 0.031 (7)  | Uiso | 1    | 1 | d | . | . | . | . |
| O233 | O | -0.0239 (10) | -0.5085 (10) | 0.3522 (5)  | 0.019 (6)  | Uiso | 1    | 1 | d | . | . | . | . |
| O234 | O | -0.0464 (11) | -0.4336 (10) | 0.3915 (5)  | 0.020 (6)  | Uiso | 1    | 1 | d | . | . | . | . |
| O235 | O | -0.1191 (11) | -0.4213 (11) | 0.4438 (5)  | 0.028 (6)  | Uiso | 1    | 1 | d | . | . | . | . |
| O236 | O | -0.0171 (10) | -0.5014 (9)  | 0.4583 (5)  | 0.016 (5)  | Uiso | 1    | 1 | d | . | . | . | . |
| O237 | O | -0.1012 (10) | -0.4557 (9)  | 0.5048 (5)  | 0.017 (5)  | Uiso | 1    | 1 | d | . | . | . | . |
| O238 | O | -0.0999 (12) | -0.5705 (11) | 0.4896 (5)  | 0.032 (7)  | Uiso | 1    | 1 | d | . | . | . | . |
| O239 | O | 0.0175 (11)  | -0.6179 (10) | 0.4720 (5)  | 0.020 (6)  | Uiso | 1    | 1 | d | . | . | . | . |
| O240 | O | -0.0415 (11) | -0.6702 (10) | 0.5246 (5)  | 0.025 (6)  | Uiso | 1    | 1 | d | . | . | . | . |
| O241 | O | -0.0300 (11) | -0.7241 (10) | 0.4746 (5)  | 0.028 (6)  | Uiso | 1    | 1 | d | . | . | . | . |
| O242 | O | 0.0336 (13)  | -0.7181 (12) | 0.4189 (6)  | 0.040 (7)  | Uiso | 1    | 1 | d | . | . | . | . |
| O243 | O | -0.0247 (14) | -0.8168 (13) | 0.4382 (6)  | 0.049 (8)  | Uiso | 1    | 1 | d | . | . | . | . |
| O244 | O | -0.0730 (14) | -0.7201 (13) | 0.3980 (6)  | 0.051 (8)  | Uiso | 1    | 1 | d | . | . | . | . |
| O245 | O | 0.0122 (12)  | -0.6479 (11) | 0.3721 (6)  | 0.037 (7)  | Uiso | 1    | 1 | d | . | . | . | . |
| O246 | O | -0.0426 (15) | -0.7167 (14) | 0.3350 (7)  | 0.058 (9)  | Uiso | 1    | 1 | d | . | . | . | . |
| O247 | O | -0.0677 (12) | -0.5970 (11) | 0.3318 (6)  | 0.034 (7)  | Uiso | 1    | 1 | d | . | . | . | . |
| O248 | O | -0.1135 (12) | -0.4816 (11) | 0.3101 (5)  | 0.030 (6)  | Uiso | 1    | 1 | d | . | . | . | . |
| O249 | O | -0.2213 (11) | -0.4427 (11) | 0.4193 (5)  | 0.028 (6)  | Uiso | 1    | 1 | d | . | . | . | . |
| O250 | O | -0.1970 (12) | -0.4923 (11) | 0.4764 (5)  | 0.031 (6)  | Uiso | 1    | 1 | d | . | . | . | . |
| O251 | O | -0.1459 (12) | -0.6727 (11) | 0.4933 (5)  | 0.032 (7)  | Uiso | 1    | 1 | d | . | . | . | . |
| O252 | O | -0.1341 (14) | -0.7404 (13) | 0.4498 (7)  | 0.055 (9)  | Uiso | 1    | 1 | d | . | . | . | . |
| O253 | O | -0.1601 (13) | -0.6634 (12) | 0.3620 (6)  | 0.041 (7)  | Uiso | 1    | 1 | d | . | . | . | . |
| O254 | O | -0.1901 (12) | -0.5476 (11) | 0.3502 (6)  | 0.035 (7)  | Uiso | 1    | 1 | d | . | . | . | . |
| O255 | O | -0.2409 (12) | -0.5478 (11) | 0.4071 (5)  | 0.031 (7)  | Uiso | 1    | 1 | d | . | . | . | . |
| O256 | O | -0.2185 (13) | -0.5922 (12) | 0.4606 (6)  | 0.040 (7)  | Uiso | 1    | 1 | d | . | . | . | . |
| O257 | O | -0.2065 (14) | -0.6600 (13) | 0.4188 (7)  | 0.053 (8)  | Uiso | 1    | 1 | d | . | . | . | . |
| O258 | O | -0.2584 (14) | -0.7086 (13) | 0.4775 (6)  | 0.049 (8)  | Uiso | 1    | 1 | d | . | . | . | . |
| O259 | O | -0.3145 (13) | -0.4979 (12) | 0.4563 (6)  | 0.038 (7)  | Uiso | 1    | 1 | d | . | . | . | . |
| O260 | O | -0.2876 (15) | -0.6188 (13) | 0.3741 (7)  | 0.056 (9)  | Uiso | 1    | 1 | d | . | . | . | . |
| O261 | O | 0.0835 (11)  | -0.6183 (10) | 0.4137 (5)  | 0.028 (6)  | Uiso | 1    | 1 | d | . | . | . | . |
| O262 | O | 0.0621 (12)  | -0.5041 (11) | 0.3963 (5)  | 0.032 (7)  | Uiso | 1    | 1 | d | . | . | . | . |
| O263 | O | 0.1072 (13)  | -0.4500 (12) | 0.4449 (6)  | 0.040 (7)  | Uiso | 1    | 1 | d | . | . | . | . |
| O264 | O | 0.1558 (13)  | -0.6409 (12) | 0.4640 (6)  | 0.043 (7)  | Uiso | 1    | 1 | d | . | . | . | . |
| O265 | O | 0.1913 (11)  | -0.5414 (10) | 0.4233 (5)  | 0.026 (6)  | Uiso | 1    | 1 | d | . | . | . | . |
| O266 | O | 0.285 (3)    | -0.478 (3)   | 0.3823 (14) | 0.064 (19) | Uiso | 0.50 | 1 | d | P | . | . | . |
| O267 | O | 0.331 (3)    | -0.546 (3)   | 0.4218 (13) | 0.056 (17) | Uiso | 0.50 | 1 | d | P | . | . | . |
| O268 | O | 0.2720 (12)  | -0.6426 (11) | 0.4104 (6)  | 0.035 (7)  | Uiso | 1    | 1 | d | . | . | . | . |
| O269 | O | 0.3556 (14)  | -0.6864 (13) | 0.4536 (6)  | 0.049 (8)  | Uiso | 1    | 1 | d | . | . | . | . |
| O270 | O | 0.3909 (13)  | -0.6827 (12) | 0.3918 (6)  | 0.038 (7)  | Uiso | 1    | 1 | d | . | . | . | . |
| O271 | O | 0.3411 (14)  | -0.5837 (13) | 0.3624 (7)  | 0.052 (8)  | Uiso | 1    | 1 | d | . | . | . | . |
| O272 | O | 0.2175 (14)  | -0.5493 (13) | 0.3574 (6)  | 0.051 (8)  | Uiso | 1    | 1 | d | . | . | . | . |
| O273 | O | 0.4694 (13)  | -0.5976 (12) | 0.3608 (6)  | 0.044 (8)  | Uiso | 1    | 1 | d | . | . | . | . |
| O274 | O | 0.4061 (11)  | -0.6100 (11) | 0.3119 (5)  | 0.028 (6)  | Uiso | 1    | 1 | d | . | . | . | . |
| O275 | O | 0.2828 (13)  | -0.6008 (12) | 0.3008 (6)  | 0.039 (7)  | Uiso | 1    | 1 | d | . | . | . | . |
| O276 | O | 0.3737 (12)  | -0.6128 (11) | 0.2550 (6)  | 0.036 (7)  | Uiso | 1    | 1 | d | . | . | . | . |
| O277 | O | 0.3026 (10)  | -0.7022 (9)  | 0.2810 (5)  | 0.017 (5)  | Uiso | 1    | 1 | d | . | . | . | . |

O278 O 0.1799 (11) -0.6633 (10) 0.3005 (5) 0.028 (6) Uiso 1 1 d . . . .  
O279 O 0.1981 (12) -0.7245 (11) 0.2528 (5) 0.030 (6) Uiso 1 1 d . . . .  
O280 O 0.1488 (11) -0.7749 (10) 0.3091 (5) 0.021 (6) Uiso 1 1 d . . . .  
O281 O 0.1042 (12) -0.7376 (11) 0.3629 (6) 0.033 (7) Uiso 1 1 d . . . .  
O282 O 0.0882 (14) -0.8492 (13) 0.3554 (6) 0.052 (8) Uiso 1 1 d . . . .  
O283 O 0.1796 (14) -0.8185 (13) 0.3885 (6) 0.050 (8) Uiso 1 1 d . . . .  
O284 O 0.1631 (12) -0.7151 (11) 0.4065 (5) 0.032 (7) Uiso 1 1 d . . . .  
O285 O 0.1576 (15) -0.8150 (14) 0.4517 (7) 0.058 (9) Uiso 1 1 d . . . .  
O286 O 0.2500 (15) -0.7421 (13) 0.4436 (7) 0.056 (9) Uiso 1 1 d . . . .  
O287 O 0.2899 (12) -0.7532 (11) 0.3878 (5) 0.030 (6) Uiso 1 1 d . . . .  
O288 O 0.3467 (11) -0.6966 (10) 0.3371 (5) 0.020 (6) Uiso 1 1 d . . . .  
O289 O 0.2460 (10) -0.7578 (10) 0.3363 (5) 0.019 (6) Uiso 1 1 d . . . .  
O290 O 0.2693 (11) -0.8102 (11) 0.2898 (5) 0.028 (6) Uiso 1 1 d . . . .  
O291 O 0.2166 (12) -0.8676 (11) 0.3397 (5) 0.029 (6) Uiso 1 1 d . . . .  
O292 O 0.2764 (13) -0.8470 (12) 0.4238 (6) 0.039 (7) Uiso 1 1 d . . . .  
O293 O 0.3702 (14) -0.7854 (13) 0.4257 (6) 0.048 (8) Uiso 1 1 d . . . .  
O294 O 0.4288 (12) -0.7133 (11) 0.2913 (5) 0.032 (7) Uiso 1 1 d . . . .  
O295 O 0.4677 (11) -0.7072 (10) 0.3433 (5) 0.025 (6) Uiso 1 1 d . . . .  
O296 O 0.3767 (12) -0.8116 (11) 0.3176 (5) 0.030 (6) Uiso 1 1 d . . . .  
O297 O 0.4174 (11) -0.7997 (11) 0.3671 (5) 0.029 (6) Uiso 1 1 d . . . .  
O298 O 0.3214 (13) -0.8612 (12) 0.3659 (6) 0.040 (7) Uiso 1 1 d . . . .  
O299 O 0.4051 (14) -0.8997 (13) 0.4105 (7) 0.052 (8) Uiso 1 1 d . . . .  
O300 O 0.5070 (12) -0.8062 (11) 0.3171 (6) 0.037 (7) Uiso 1 1 d . . . .  
O301 O 0.3340 (14) -0.9147 (13) 0.3142 (6) 0.050 (8) Uiso 1 1 d . . . .  
O302 O 0.1319 (11) -0.6298 (10) 0.3577 (5) 0.025 (6) Uiso 1 1 d . . . .  
O303 O 0.0630 (13) -0.5764 (12) 0.3050 (6) 0.044 (8) Uiso 1 1 d . . . .  
O304 O 0.2261 (14) -0.4838 (13) 0.2993 (6) 0.052 (8) Uiso 1 1 d . . . .  
O305 O 0.1670 (13) -0.5426 (12) 0.2629 (6) 0.043 (8) Uiso 1 1 d . . . .  
O306 O 0.0977 (11) -0.4866 (10) 0.3357 (5) 0.021 (6) Uiso 1 1 d . . . .  
O307 O 0.0048 (10) -0.3932 (9) 0.3320 (4) 0.011 (5) Uiso 1 1 d . . . .  
O308 O 0.0693 (11) -0.3917 (10) 0.3724 (5) 0.024 (6) Uiso 1 1 d . . . .  
O309 O -0.1433 (11) -0.4656 (10) 0.3691 (5) 0.024 (6) Uiso 1 1 d . . . .  
O310 O -0.1245 (19) 0.2206 (18) 0.1325 (9) 0.096 (13) Uiso 1 1 d . . . .  
O311 O -0.2506 (13) 0.0731 (12) 0.0530 (6) 0.043 (8) Uiso 1 1 d . . . .  
O312 O -0.231 (3) 0.160 (2) 0.2570 (12) 0.15 (2) Uiso 1 1 d . . . .  
O313 O -0.234 (2) 0.151 (2) 0.3412 (11) 0.132 (17) Uiso 1 1 d . . . .  
O314 O -0.4143 (19) -0.0901 (17) 0.4574 (9) 0.095 (13) Uiso 1 1 d . . . .  
O315 O -0.271 (2) -0.239 (2) 0.4938 (11) 0.128 (17) Uiso 1 1 d . . . .  
O316 O -0.535 (3) -0.292 (3) 0.3372 (14) 0.19 (2) Uiso 1 1 d . . . .  
O317 O -0.5455 (16) -0.1592 (15) 0.3334 (8) 0.072 (10) Uiso 1 1 d . . . .  
O318 O -0.507 (2) -0.129 (2) 0.2630 (11) 0.031 (13) Uiso 0.50 1 d P . . . .  
O319 O -0.354 (2) -0.345 (2) 0.2506 (10) 0.120 (16) Uiso 1 1 d . . . .  
O320 O -0.1405 (14) -0.0272 (13) 0.0526 (7) 0.055 (9) Uiso 1 1 d . . . .  
O321 O -0.2960 (13) -0.0563 (12) 0.0384 (6) 0.040 (7) Uiso 1 1 d . . . .  
O322 O -0.356 (4) -0.233 (4) 0.0450 (18) 0.10 (3) Uiso 0.50 1 d P . . . .  
O323 O -0.4087 (15) -0.0815 (14) 0.0093 (7) 0.059 (9) Uiso 1 1 d . . . .  
O324 O 0.0000 0.0000 0.0000 0.046 (11) Uiso 1 2 d S . . . .  
O325 O -0.2981 (19) -0.2923 (18) -0.0164 (9) 0.097 (13) Uiso 1 1 d . . . .  
O326 O 0.1036 (17) -0.2500 (16) -0.0171 (8) 0.082 (11) Uiso 1 1 d . . . .  
O327 O -0.014 (3) -0.417 (2) -0.0051 (12) 0.15 (2) Uiso 1 1 d . . . .  
O328 O 0.078 (3) -0.476 (3) 0.0031 (14) 0.18 (2) Uiso 1 1 d . . . .  
O329 O 0.2425 (18) -0.4162 (17) -0.0429 (8) 0.088 (12) Uiso 1 1 d . . . .  
O330 O -0.056 (2) -0.137 (2) 0.4384 (10) 0.118 (16) Uiso 1 1 d . . . .  
O331 O 0.260 (2) -0.593 (2) 0.4866 (11) 0.127 (17) Uiso 1 1 d . . . .  
O332 O -0.220 (3) -0.722 (2) 0.3228 (12) 0.15 (2) Uiso 1 1 d . . . .  
O333 O 0.188 (2) -0.421 (2) 0.3959 (10) 0.115 (15) Uiso 1 1 d . . . .  
O335 O -0.0505 (13) -0.8464 (12) 0.3751 (6) 0.047 (8) Uiso 1 1 d . . . .  
O336 O -0.059 (2) -0.871 (2) 0.3317 (10) 0.123 (16) Uiso 1 1 d . . . .  
O337 O 0.059 (3) -0.821 (2) 0.5002 (12) 0.15 (2) Uiso 1 1 d . . . .  
O338 O 0.027 (3) -0.801 (2) 0.2866 (12) 0.148 (19) Uiso 1 1 d . . . .  
O339 O 0.382 (2) -1.049 (2) 0.3367 (10) 0.117 (16) Uiso 1 1 d . . . .  
O340 O 0.438 (3) -1.094 (2) 0.2769 (12) 0.044 (15) Uiso 0.50 1 d P . . . .  
O341 O 0.470 (3) -0.960 (2) 0.2986 (12) 0.15 (2) Uiso 1 1 d . . . .  
O342 O 0.698 (3) -0.754 (3) 0.3928 (16) 0.08 (2) Uiso 0.50 1 d P . . . .

O343 O 0.611(2) -0.8336(18) 0.3561(9) 0.100(13) Uiso 1 1 d . . . .  
O344 O 0.599(3) -0.693(2) 0.3420(12) 0.15(2) Uiso 1 1 d . . . .  
O345 O 0.6573(18) -0.7729(17) 0.2922(8) 0.089(12) Uiso 1 1 d . . . .  
O346 O -0.1525(15) -0.0550(14) 0.1340(7) 0.059(9) Uiso 1 1 d . . . .  
O347 O 0.5374(16) -0.7308(14) 0.2499(7) 0.066(10) Uiso 1 1 d . . . .  
O348 O 0.639(3) -0.853(3) 0.2335(13) 0.17(2) Uiso 1 1 d . . . .  
O349 O 0.4461(15) -0.7302(14) 0.2092(7) 0.064(10) Uiso 1 1 d . . . .  
O350 O 0.493(2) -0.589(2) 0.2032(10) 0.115(15) Uiso 1 1 d . . . .  
O351 O 0.4138(15) -0.6383(14) 0.1471(7) 0.058(9) Uiso 1 1 d . . . .  
O352 O 0.514(3) -0.499(2) 0.1468(12) 0.16(2) Uiso 1 1 d . . . .  
O353 O 0.5090(19) -0.7066(17) 0.1159(9) 0.094(13) Uiso 1 1 d . . . .  
O354 O 0.1233(9) 0.3944(8) 0.0527(4) 0.005(5) Uiso 1 1 d . . . .  
O355 O 0.3588(16) -0.4908(15) 0.2864(8) 0.072(10) Uiso 1 1 d . . . .  
O356 O 0.2820(13) -0.5128(12) 0.2354(6) 0.043(8) Uiso 1 1 d . . . .  
O357 O 0.6865(19) -0.3221(18) 0.0943(9) 0.098(13) Uiso 1 1 d . . . .  
O358 O 0.5436(18) -0.0440(16) 0.2758(8) 0.084(12) Uiso 1 1 d . . . .  
O359 O 0.434(3) -0.223(3) 0.2147(14) 0.19(3) Uiso 1 1 d . . . .  
O360 O -0.280(3) -0.352(2) 0.3662(12) 0.15(2) Uiso 1 1 d . . . .  
O361 O -0.1233(11) -0.5217(10) 0.4302(5) 0.021(6) Uiso 1 1 d . . . .  
O362 O -0.0904(12) -0.6391(11) 0.4415(6) 0.035(7) Uiso 1 1 d . . . .  
O363 O -0.1105(12) -0.5913(11) 0.3876(5) 0.030(6) Uiso 1 1 d . . . .  
O364 O -0.0932(19) -0.6028(18) 0.2719(9) 0.096(13) Uiso 1 1 d . . . .  
O365 O 0.100(3) -0.689(3) 0.2151(14) 0.19(3) Uiso 1 1 d . . . .  
O366 O 0.4854(16) -0.2126(15) 0.1527(7) 0.068(10) Uiso 1 1 d . . . .  
O367 O 0.537(3) -0.208(2) 0.0770(12) 0.15(2) Uiso 1 1 d . . . .  
O368 O 0.581(3) -0.348(2) 0.1392(12) 0.146(19) Uiso 1 1 d . . . .  
O369 O 0.640(2) 0.313(2) 0.0726(12) 0.145(19) Uiso 1 1 d . . . .  
O370 O 0.772(2) 0.255(2) 0.0425(11) 0.133(17) Uiso 1 1 d . . . .  
O371 O 0.782(2) 0.125(2) 0.1162(11) 0.132(17) Uiso 1 1 d . . . .  
O372 O 0.3823(17) 0.2115(16) 0.2535(8) 0.081(11) Uiso 1 1 d . . . .  
O373 O 0.0381(13) -0.0731(12) 0.4014(6) 0.046(8) Uiso 1 1 d . . . .  
O374 O 0.160(2) 0.122(2) 0.2770(11) 0.141(19) Uiso 1 1 d . . . .  
O375 O 0.4877(17) -0.8635(15) 0.2614(8) 0.074(11) Uiso 1 1 d . . . .  
O376 O -0.1781(17) 0.0072(16) 0.2034(8) 0.078(11) Uiso 1 1 d . . . .  
O377 O -0.1303(13) -0.1596(12) 0.1918(6) 0.039(7) Uiso 1 1 d . . . .  
O378 O 0.3763(12) -0.1140(11) 0.2276(6) 0.037(7) Uiso 1 1 d . . . .  
O379 O 0.2907(9) -0.6635(8) 0.1379(4) 0.007(5) Uiso 1 1 d . . . .  
O380 O 0.367(2) -0.331(2) 0.2377(10) 0.123(16) Uiso 1 1 d . . . .  
O381 O 0.189(2) 0.327(2) 0.1549(11) 0.138(18) Uiso 1 1 d . . . .  
O382 O 0.0756(17) -0.5917(16) 0.2402(8) 0.079(11) Uiso 1 1 d . . . .  
O383 O 0.2001(17) 0.2141(16) 0.1787(8) 0.079(11) Uiso 1 1 d . . . .  
O384 O 0.3022(13) -0.6643(11) 0.2030(6) 0.019(6) Uiso 1 1 d . . . .  
Na1 Na 0.0556(8) -0.1230(7) 0.1712(4) 0.043(4) Uiso 1 1 d . . . .  
Na2 Na 0.5372(7) -0.4750(7) 0.0097(3) 0.035(4) Uiso 1 1 d . . . .  
Na3 Na -0.2234(6) -0.1060(6) 0.0898(3) 0.022(3) Uiso 1 1 d . . . .  
Na4 Na 0.6232(8) -0.2350(7) 0.1355(4) 0.048(5) Uiso 1 1 d . . . .  
Na5 Na 0.7278(10) -0.1300(9) 0.1783(5) 0.076(6) Uiso 1 1 d . . . .  
Na6 Na 0.3663(7) -0.9998(6) 0.3742(3) 0.032(4) Uiso 1 1 d . . . .  
Na7 Na 0.3985(8) -0.6320(8) 0.2007(4) 0.050(5) Uiso 1 1 d . . . .  
Na8 Na 0.279(3) -0.650(3) 0.2060(15) 0.28(3) Uiso 1 1 d . . . .  
Na9 Na -0.4211(9) 0.1770(8) 0.2740(4) 0.054(5) Uiso 1 1 d . . . .  
Na10 Na -0.2082(9) -0.0698(8) 0.1823(4) 0.062(5) Uiso 1 1 d . . . .  
Na11 Na -0.2335(8) -0.1824(7) 0.0589(4) 0.041(4) Uiso 1 1 d . . . .  
Na12 Na -0.2247(10) -0.4606(9) 0.2669(5) 0.073(6) Uiso 1 1 d . . . .  
Na16 Na 0.0385(13) -0.9484(12) 0.3766(6) 0.112(9) Uiso 1 1 d . . . .  
K3 K -0.0038(5) -0.6354(4) 0.5727(2) 0.042(3) Uani 1 1 d . . . .  
K4 K -0.3905(4) 0.0172(4) 0.2273(2) 0.045(3) Uani 1 1 d . . . .  
As1 As 0.47035(16) 0.03879(15) 0.12633(8) 0.0143(8) Uani 1 1 d . . . .  
As2 As 0.12034(17) 0.08838(14) 0.09402(7) 0.0137(8) Uani 1 1 d . . . .  
As3 As 0.27741(16) -0.36469(14) 0.10204(7) 0.0113(8) Uani 1 1 d . . . .  
As4 As -0.07673(16) -0.38210(15) 0.15094(8) 0.0127(8) Uani 1 1 d . . . .  
. . . . .  
As5 As 0.11950(16) -0.18251(15) 0.30992(7) 0.0143(8) Uani 1 1 d . . . .  
As6 As -0.23449(17) -0.11016(16) 0.34885(8) 0.0204(9) Uani 1 1 d . . . .

.  
As7 As -0.06567(18) -0.57874(16) 0.41578(8) 0.0235(9) Uani 1 1 d . . .  
. As8 As 0.26641(19) -0.70344(17) 0.35522(8) 0.0258(10) Uani 1 1 d . . .  
. Cs1 Cs -0.31822(17) -0.20427(15) 0.23476(8) 0.0671(10) Uani 1 1 d . . .  
. Cs5 Cs 0.5740(2) 0.20870(19) -0.00403(9) 0.0469(11) Uani 0.70 1 d P .  
. Cs4 Cs -0.08059(12) 0.12997(11) -0.01937(6) 0.0310(6) Uani 1 1 d . . .  
. Cs3 Cs 0.10043(11) -0.40528(10) 0.27020(5) 0.0275(6) Uani 1 1 d . . .  
Cs2 Cs 0.28760(12) -0.17908(12) 0.17670(5) 0.0333(6) Uani 1 1 d . . .  
Cs6 Cs -0.2276(3) -0.3650(3) 0.31392(18) 0.074(2) Uani 0.50 1 d P . . .  
Cs7 Cs 0.0745(5) 0.3759(4) 0.1048(3) 0.092(4) Uani 0.40 1 d P . . .  
Gd1 Gd 0.39441(8) -0.06517(7) 0.08604(4) 0.0147(4) Uani 1 1 d . . . .  
Gd2 Gd 0.16063(8) 0.03011(7) 0.17320(4) 0.0159(4) Uani 1 1 d . . . .  
Gd3 Gd 0.20196(8) -0.35111(7) 0.18173(4) 0.0101(4) Uani 1 1 d . . . .  
Gd4 Gd -0.01306(8) -0.24085(7) 0.11343(4) 0.0121(4) Uani 1 1 d . . . .  
Gd5 Gd -0.00244(8) -0.21495(7) 0.26239(3) 0.0113(4) Uani 1 1 d . . . .  
Gd6 Gd -0.13731(8) -0.25162(8) 0.38664(4) 0.0180(4) Uani 1 1 d . . . .  
Gd7 Gd 0.08449(9) -0.55073(8) 0.44552(4) 0.0245(5) Uani 1 1 d . . . .  
Gd8 Gd 0.17250(9) -0.56865(8) 0.31609(4) 0.0243(5) Uani 1 1 d . . . .  
W1 W 0.58855(7) 0.14215(7) 0.08618(3) 0.0221(4) Uani 1 1 d . . . .  
W2 W 0.64804(7) 0.01467(7) 0.14030(3) 0.0225(4) Uani 1 1 d . . . .  
W3 W 0.54174(7) 0.14057(7) 0.16818(3) 0.0222(4) Uani 1 1 d . . . .  
W4 W 0.42999(7) 0.04942(7) 0.20222(3) 0.0214(4) Uani 1 1 d . . . .  
W5 W 0.54027(7) -0.07439(7) 0.17948(3) 0.0220(4) Uani 1 1 d . . . .  
W6 W 0.57974(7) -0.07721(7) 0.10572(3) 0.0187(3) Uani 1 1 d . . . .  
W7 W 0.52465(7) 0.04698(7) 0.05125(3) 0.0189(3) Uani 1 1 d . . . .  
W8 W 0.43331(7) 0.16858(7) 0.07041(3) 0.0217(4) Uani 1 1 d . . . .  
W9 W 0.38892(7) 0.16779(6) 0.15194(3) 0.0211(4) Uani 1 1 d . . . .  
W10 W 0.29710(7) 0.08687(6) 0.10922(3) 0.0161(3) Uani 1 1 d . . . .  
W11 W 0.18617(8) 0.22865(6) 0.09216(3) 0.0254(4) Uani 1 1 d . . . .  
W12 W 0.23410(7) 0.13105(6) 0.03524(3) 0.0164(3) Uani 1 1 d . . . .  
W13 W 0.16168(7) 0.01119(6) 0.03305(3) 0.0125(3) Uani 1 1 d . . . .  
W14 W 0.02613(7) -0.02781(6) 0.08765(3) 0.0158(3) Uani 1 1 d . . . .  
W15 W -0.01488(7) 0.05786(7) 0.14170(3) 0.0219(4) Uani 1 1 d . . . .  
W16 W 0.06446(8) 0.18708(7) 0.14371(3) 0.0277(4) Uani 1 1 d . . . .  
W17 W 0.03225(8) 0.24132(7) 0.07274(3) 0.0286(4) Uani 1 1 d . . . .  
W18 W 0.08516(7) 0.14541(6) 0.01415(3) 0.0180(3) Uani 1 1 d . . . .  
W19 W -0.05058(7) 0.10878(7) 0.07053(3) 0.0232(4) Uani 1 1 d . . . .  
W20 W 0.19784(6) -0.07426(6) 0.10686(3) 0.0100(3) Uani 1 1 d . . . .  
W21 W 0.17331(6) -0.21304(6) 0.11435(3) 0.0093(3) Uani 1 1 d . . . .  
W22 W 0.24809(7) -0.25857(6) 0.04154(3) 0.0145(3) Uani 1 1 d . . . .  
W23 W 0.35707(6) -0.23422(6) 0.09504(3) 0.0118(3) Uani 1 1 d . . . .  
W24 W 0.38946(6) -0.34618(6) 0.14906(3) 0.0144(3) Uani 1 1 d . . . .  
W25 W 0.32704(7) -0.48542(6) 0.15094(3) 0.0172(3) Uani 1 1 d . . . .  
W26 W 0.23400(7) -0.51340(6) 0.09962(3) 0.0200(4) Uani 1 1 d . . . .  
W27 W 0.19251(7) -0.38793(6) 0.04347(3) 0.0173(3) Uani 1 1 d . . . .  
W28 W 0.34886(7) -0.37349(7) 0.02158(3) 0.0189(3) Uani 1 1 d . . . .  
W29 W 0.45657(7) -0.35383(6) 0.07723(3) 0.0164(3) Uani 1 1 d . . . .  
W30 W 0.39240(7) -0.49738(6) 0.07960(3) 0.0194(3) Uani 1 1 d . . . .  
W31 W 0.10103(7) -0.39455(6) 0.11922(3) 0.0128(3) Uani 1 1 d . . . .  
W32 W -0.02071(7) -0.46560(7) 0.08583(3) 0.0207(4) Uani 1 1 d . . . .  
W33 W 0.01838(7) -0.51626(6) 0.16289(3) 0.0193(3) Uani 1 1 d . . . .  
W34 W -0.04419(7) -0.44874(6) 0.22254(3) 0.0174(3) Uani 1 1 d . . . .  
W35 W -0.16417(7) -0.31893(6) 0.21419(3) 0.0168(3) Uani 1 1 d . . . .  
W36 W -0.19723(7) -0.26753(6) 0.14389(3) 0.0162(3) Uani 1 1 d . . . .  
W37 W -0.12513(7) -0.34070(6) 0.08009(3) 0.0180(3) Uani 1 1 d . . . .  
W38 W -0.17928(8) -0.46829(7) 0.11302(4) 0.0253(4) Uani 1 1 d . . . .  
W39 W -0.25402(7) -0.39233(7) 0.17833(3) 0.0230(4) Uani 1 1 d . . . .  
W40 W -0.13591(7) -0.52369(7) 0.18980(4) 0.0234(4) Uani 1 1 d . . . .  
W41 W 0.01477(6) -0.30110(6) 0.20141(3) 0.0098(3) Uani 1 1 d . . . .

W42 W 0.12723 (7) -0.09614 (6) 0.24142 (3) 0.0130 (3) Uani 1 1 d . . . .  
W43 W 0.19190 (6) -0.25010 (6) 0.24940 (3) 0.0118 (3) Uani 1 1 d . . . .  
W44 W 0.20639 (7) -0.32684 (7) 0.31776 (3) 0.0187 (3) Uani 1 1 d . . . .  
W45 W 0.13897 (7) -0.25353 (7) 0.38234 (3) 0.0228 (4) Uani 1 1 d . . . .  
W46 W 0.08147 (7) -0.11094 (7) 0.37368 (3) 0.0227 (4) Uani 1 1 d . . . .  
W47 W 0.07109 (7) -0.01980 (6) 0.30094 (3) 0.0178 (3) Uani 1 1 d . . . .  
W48 W 0.23259 (7) -0.06194 (7) 0.28556 (3) 0.0193 (3) Uani 1 1 d . . . .  
W49 W 0.30206 (7) -0.21942 (7) 0.29149 (3) 0.0193 (3) Uani 1 1 d . . . .  
W50 W 0.24027 (7) -0.15149 (7) 0.36002 (3) 0.0252 (4) Uani 1 1 d . . . .  
W51 W -0.05622 (7) -0.12115 (6) 0.33135 (3) 0.0160 (3) Uani 1 1 d . . . .  
W52 W -0.14590 (8) -0.01141 (7) 0.38005 (4) 0.0279 (4) Uani 1 1 d . . . .  
W53 W -0.16917 (7) 0.00320 (7) 0.29993 (3) 0.0232 (4) Uani 1 1 d . . . .  
W54 W -0.26045 (8) -0.07986 (8) 0.27235 (4) 0.0296 (4) Uani 1 1 d . . . .  
W55 W -0.34921 (8) -0.18498 (8) 0.32370 (4) 0.0341 (4) Uani 1 1 d . . . .  
W56 W -0.32955 (8) -0.20192 (7) 0.39729 (4) 0.0317 (4) Uani 1 1 d . . . .  
W57 W -0.22630 (8) -0.11332 (7) 0.42588 (4) 0.0305 (4) Uani 1 1 d . . . .  
W58 W -0.30872 (8) 0.01198 (8) 0.39417 (4) 0.0379 (5) Uani 1 1 d . . . .  
W59 W -0.32972 (8) 0.02814 (7) 0.31294 (4) 0.0318 (4) Uani 1 1 d . . . .  
W60 W -0.41654 (8) -0.07923 (8) 0.36655 (4) 0.0390 (5) Uani 1 1 d . . . .  
W61 W 0.02626 (7) -0.32128 (6) 0.34256 (3) 0.0154 (3) Uani 1 1 d . . . .  
W62 W 0.03883 (7) -0.46303 (6) 0.36267 (3) 0.0197 (4) Uani 1 1 d . . . .  
W63 W -0.10813 (8) -0.52193 (7) 0.34358 (4) 0.0285 (4) Uani 1 1 d . . . .  
W64 W -0.13125 (7) -0.42726 (7) 0.40279 (3) 0.0218 (4) Uani 1 1 d . . . .  
W65 W -0.09965 (8) -0.49038 (7) 0.47210 (3) 0.0246 (4) Uani 1 1 d . . . .  
W66 W -0.05383 (8) -0.64838 (7) 0.48789 (4) 0.0308 (4) Uani 1 1 d . . . .  
W67 W -0.04065 (9) -0.74199 (7) 0.43596 (4) 0.0397 (5) Uani 1 1 d . . . .  
W68 W -0.06720 (9) -0.66794 (7) 0.36020 (4) 0.0378 (5) Uani 1 1 d . . . .  
W69 W -0.21506 (9) -0.60702 (8) 0.38375 (4) 0.0414 (5) Uani 1 1 d . . . .  
W70 W -0.18794 (9) -0.67596 (8) 0.46081 (4) 0.0420 (5) Uani 1 1 d . . . .  
W71 W -0.23513 (8) -0.51448 (8) 0.44482 (4) 0.0351 (4) Uani 1 1 d . . . .  
W72 W 0.09175 (8) -0.66767 (7) 0.38757 (4) 0.0308 (4) Uani 1 1 d . . . .  
W73 W 0.14690 (9) -0.80398 (7) 0.35129 (4) 0.0373 (5) Uani 1 1 d . . . .  
W74 W 0.21857 (8) -0.72952 (7) 0.28855 (3) 0.0257 (4) Uani 1 1 d . . . .  
W75 W 0.35157 (8) -0.64563 (7) 0.28972 (3) 0.0254 (4) Uani 1 1 d . . . .  
W76 W 0.40961 (8) -0.63320 (8) 0.35457 (4) 0.0360 (5) Uani 1 1 d . . . .  
W77 W 0.32709 (10) -0.70536 (9) 0.42344 (4) 0.0471 (6) Uani 1 1 d . . . .  
W78 W 0.20741 (10) -0.78719 (8) 0.42173 (4) 0.0443 (5) Uani 1 1 d . . . .  
W79 W 0.35838 (10) -0.83616 (8) 0.39704 (4) 0.0454 (5) Uani 1 1 d . . . .  
W80 W 0.30050 (8) -0.85007 (7) 0.32463 (4) 0.0319 (4) Uani 1 1 d . . . .  
W81 W 0.43634 (8) -0.76286 (7) 0.32630 (4) 0.0326 (4) Uani 1 1 d . . . .  
W82 W 0.25398 (16) -0.56134 (15) 0.39316 (7) 0.1098 (11) Uani 1 1 d . . . .  
Na26 Na -0.0688 (8) 0.3678 (7) 0.1211 (4) 0.043 (4) Uiso 1 1 d . . . .  
Na25 Na 0.3464 (8) -0.6748 (8) 0.0951 (4) 0.049 (5) Uiso 1 1 d . . . .  
Na24 Na -0.0474 (9) -0.0173 (8) 0.2290 (4) 0.057 (5) Uiso 1 1 d . . . .  
Na23 Na 0.5185 (9) -0.9171 (8) 0.3638 (4) 0.062 (5) Uiso 1 1 d . . . .  
Na22 Na 0.1813 (11) -0.9776 (10) 0.3563 (5) 0.085 (7) Uiso 1 1 d . . . .  
Na21 Na 0.0953 (10) -0.2065 (9) 0.4633 (5) 0.073 (6) Uiso 1 1 d . . . .  
Na20 Na 0.2949 (12) 0.1080 (11) 0.2478 (6) 0.102 (8) Uiso 1 1 d . . . .  
O399 O -0.0855 (12) -0.3687 (11) 0.2910 (6) 0.033 (7) Uiso 1 1 d . . . .  
O398 O 0.1913 (12) -0.5538 (11) 0.1920 (5) 0.029 (6) Uiso 1 1 d . . . .  
O397 O 0.3950 (12) -0.9969 (11) 0.2914 (6) 0.036 (7) Uiso 1 1 d . . . .  
O392 O 0.0053 (13) -0.3044 (12) 0.0206 (6) 0.043 (8) Uiso 1 1 d . . . .  
O396 O -0.2352 (13) 0.1606 (12) 0.0648 (6) 0.046 (8) Uiso 1 1 d . . . .  
O395 O -0.1673 (15) -0.3024 (14) -0.0110 (7) 0.060 (9) Uiso 1 1 d . . . .  
O394 O -0.3390 (18) -0.1491 (17) 0.0386 (8) 0.087 (12) Uiso 1 1 d . . . .  
O393 O 0.3228 (17) -0.0987 (16) 0.0011 (8) 0.079 (11) Uiso 1 1 d . . . .  
O391 O -0.278 (3) -0.348 (3) 0.4494 (16) 0.22 (3) Uiso 1 1 d . . . .

loop\_  
\_atom\_site\_aniso\_label  
\_atom\_site\_aniso\_U\_11  
\_atom\_site\_aniso\_U\_22  
\_atom\_site\_aniso\_U\_33  
\_atom\_site\_aniso\_U\_23

\_atom\_site\_aniso\_U\_13  
\_atom\_site\_aniso\_U\_12  
K3 0.045(6) 0.046(6) 0.028(5) 0.000(5) 0.003(4) 0.007(5)  
K4 0.037(6) 0.059(7) 0.037(6) -0.006(5) -0.018(5) 0.007(5)  
As1 0.0130(19) 0.017(2) 0.0141(19) -0.0008(16) -0.0043(15) -0.0058  
(16)  
As2 0.020(2) 0.0082(19) 0.0116(18) 0.0002(15) -0.0005(15) 0.0014(15)  
As3 0.0114(18) 0.0082(18) 0.0135(18) 0.0004(15) 0.0005(14) -0.0015  
(14)  
As4 0.0099(18) 0.0101(19) 0.0183(19) 0.0005(15) -0.0017(15) -0.0052  
(15)  
As5 0.0157(19) 0.014(2) 0.0113(18) 0.0012(15) 0.0020(15) -0.0004(15)  
As6 0.016(2) 0.021(2) 0.022(2) -0.0024(17) 0.0001(16) 0.0026(17)  
As7 0.029(2) 0.018(2) 0.019(2) 0.0047(17) 0.0065(17) -0.0027(18)  
As8 0.034(2) 0.018(2) 0.021(2) -0.0012(18) 0.0008(18) 0.0074(18)  
Cs1 0.065(2) 0.059(2) 0.074(2) -0.0109(19) 0.0043(19) -0.0008(18)  
Cs5 0.060(3) 0.049(3) 0.031(2) 0.002(2) 0.003(2) -0.019(2)  
Cs4 0.0286(14) 0.0249(14) 0.0415(16) -0.0025(12) -0.0116(12) -0.0048  
(11)  
Cs3 0.0298(14) 0.0250(14) 0.0235(13) 0.0016(11) 0.0018(11) 0.0028(11)  
Cs2 0.0373(16) 0.0426(17) 0.0203(13) 0.0032(12) 0.0008(11) -0.0176  
(13)  
Cs6 0.056(5) 0.056(5) 0.110(6) -0.018(4) 0.007(4) -0.012(4)  
Cs7 0.071(7) 0.044(6) 0.173(11) -0.058(7) -0.022(7) 0.006(5)  
Gd1 0.0163(9) 0.0139(10) 0.0142(9) 0.0007(8) -0.0006(7) -0.0066(8)  
Gd2 0.0242(10) 0.0123(10) 0.0108(9) -0.0008(7) -0.0009(8) -0.0020(8)  
Gd3 0.0105(9) 0.0069(9) 0.0118(9) 0.0026(7) -0.0012(7) -0.0016(7)  
Gd4 0.0118(9) 0.0128(9) 0.0117(9) -0.0004(7) -0.0031(7) -0.0013(7)  
Gd5 0.0122(9) 0.0115(9) 0.0087(8) 0.0006(7) 0.0007(7) -0.0005(7)  
Gd6 0.0173(10) 0.0178(10) 0.0156(9) 0.0018(8) 0.0033(8) 0.0013(8)  
Gd7 0.0326(12) 0.0159(10) 0.0177(10) 0.0050(8) 0.0094(9) 0.0046(9)  
Gd8 0.0301(11) 0.0155(10) 0.0217(10) 0.0022(8) 0.0048(9) 0.0050(9)  
W1 0.0235(9) 0.0224(9) 0.0225(9) -0.0006(7) -0.0009(7) -0.0145(7)  
W2 0.0194(9) 0.0256(9) 0.0238(9) -0.0043(7) -0.0029(7) -0.0058(7)  
W3 0.0227(9) 0.0249(9) 0.0224(8) -0.0065(7) -0.0046(7) -0.0099(7)  
W4 0.0225(9) 0.0267(9) 0.0160(8) -0.0040(7) 0.0002(7) -0.0076(7)  
W5 0.0249(9) 0.0242(9) 0.0171(8) 0.0003(7) -0.0052(7) -0.0048(7)  
W6 0.0195(8) 0.0204(9) 0.0163(8) -0.0026(7) 0.0002(6) -0.0047(7)  
W7 0.0250(9) 0.0207(9) 0.0123(8) 0.0015(7) 0.0007(6) -0.0135(7)  
W8 0.0255(9) 0.0154(8) 0.0251(9) 0.0040(7) -0.0040(7) -0.0125(7)  
W9 0.0217(9) 0.0159(8) 0.0285(9) -0.0075(7) -0.0038(7) -0.0058(7)  
W10 0.0199(8) 0.0127(8) 0.0169(8) 0.0002(6) -0.0035(6) -0.0075(7)  
W11 0.0484(11) 0.0087(8) 0.0191(8) -0.0011(7) -0.0051(8) -0.0029(7)  
W12 0.0233(8) 0.0132(8) 0.0125(7) 0.0016(6) 0.0008(6) -0.0076(6)  
W13 0.0170(8) 0.0125(8) 0.0083(7) -0.0002(6) -0.0004(6) -0.0051(6)  
W14 0.0128(8) 0.0198(8) 0.0139(8) 0.0031(6) -0.0012(6) -0.0049(6)  
W15 0.0202(8) 0.0258(9) 0.0150(8) 0.0021(7) 0.0048(6) 0.0030(7)  
W16 0.0477(11) 0.0136(9) 0.0184(8) -0.0038(7) -0.0002(8) 0.0080(8)  
W17 0.0483(11) 0.0131(9) 0.0203(9) 0.0008(7) -0.0030(8) 0.0075(8)  
W18 0.0255(9) 0.0152(8) 0.0120(7) 0.0040(6) -0.0050(6) -0.0020(7)  
W19 0.0168(8) 0.0273(9) 0.0210(8) 0.0031(7) -0.0002(7) 0.0046(7)  
W20 0.0105(7) 0.0089(7) 0.0104(7) 0.0012(6) -0.0008(6) -0.0033(6)  
W21 0.0102(7) 0.0067(7) 0.0106(7) 0.0007(6) -0.0004(6) -0.0023(6)  
W22 0.0171(8) 0.0138(8) 0.0115(7) 0.0001(6) -0.0003(6) -0.0008(6)  
W23 0.0105(7) 0.0114(8) 0.0126(7) 0.0006(6) 0.0016(6) -0.0034(6)  
W24 0.0102(7) 0.0172(8) 0.0149(8) 0.0009(6) -0.0012(6) -0.0020(6)  
W25 0.0154(8) 0.0113(8) 0.0214(8) 0.0029(6) 0.0017(6) 0.0024(6)  
W26 0.0199(8) 0.0100(8) 0.0295(9) -0.0055(7) 0.0015(7) -0.0005(6)  
W27 0.0187(8) 0.0189(8) 0.0154(8) -0.0068(7) -0.0003(6) -0.0028(7)  
W28 0.0189(8) 0.0220(9) 0.0148(8) -0.0044(7) 0.0028(6) -0.0008(7)  
W29 0.0113(8) 0.0172(8) 0.0196(8) -0.0021(7) 0.0028(6) -0.0017(6)  
W30 0.0179(8) 0.0147(8) 0.0239(8) -0.0048(7) 0.0041(7) 0.0010(7)  
W31 0.0143(8) 0.0090(7) 0.0156(8) -0.0028(6) -0.0016(6) -0.0020(6)  
W32 0.0215(9) 0.0180(9) 0.0263(9) -0.0078(7) -0.0054(7) -0.0075(7)

W33 0.0191(8) 0.0109(8) 0.0284(9) -0.0015(7) -0.0018(7) -0.0052(6)  
W34 0.0170(8) 0.0144(8) 0.0187(8) 0.0056(6) -0.0001(6) -0.0051(6)  
W35 0.0103(7) 0.0219(9) 0.0176(8) -0.0011(7) 0.0017(6) -0.0041(6)  
W36 0.0098(7) 0.0187(8) 0.0202(8) -0.0014(7) -0.0043(6) -0.0013(6)  
W37 0.0179(8) 0.0205(9) 0.0179(8) -0.0032(7) -0.0063(6) -0.0058(7)  
W38 0.0247(9) 0.0228(9) 0.0329(10) -0.0053(8) -0.0088(7) -0.0125(7)  
W39 0.0137(8) 0.0256(9) 0.0302(9) 0.0002(7) -0.0032(7) -0.0078(7)  
W40 0.0231(9) 0.0147(8) 0.0327(9) 0.0033(7) -0.0024(7) -0.0115(7)  
W41 0.0091(7) 0.0098(7) 0.0094(7) 0.0015(6) 0.0007(6) -0.0014(6)  
W42 0.0173(8) 0.0112(8) 0.0101(7) 0.0026(6) -0.0020(6) -0.0047(6)  
W43 0.0107(7) 0.0131(8) 0.0101(7) 0.0012(6) 0.0021(6) -0.0017(6)  
W44 0.0146(8) 0.0208(9) 0.0167(8) 0.0067(7) 0.0014(6) 0.0002(7)  
W45 0.0224(9) 0.0315(10) 0.0124(8) 0.0052(7) -0.0007(7) -0.0052(7)  
W46 0.0254(9) 0.0310(10) 0.0114(8) -0.0019(7) -0.0010(7) -0.0035(7)  
W47 0.0235(9) 0.0160(8) 0.0142(8) -0.0018(6) 0.0000(6) -0.0056(7)  
W48 0.0203(8) 0.0242(9) 0.0150(8) -0.0002(7) -0.0026(6) -0.0101(7)  
W49 0.0135(8) 0.0273(9) 0.0160(8) 0.0042(7) -0.0023(6) -0.0058(7)  
W50 0.0251(9) 0.0379(10) 0.0134(8) 0.0012(7) -0.0056(7) -0.0085(8)  
W51 0.0182(8) 0.0173(8) 0.0110(7) -0.0011(6) 0.0010(6) 0.0005(6)  
W52 0.0325(10) 0.0245(9) 0.0268(9) -0.0109(8) 0.0033(8) -0.0012(8)  
W53 0.0200(9) 0.0191(9) 0.0274(9) 0.0047(7) -0.0019(7) 0.0000(7)  
W54 0.0241(9) 0.0380(11) 0.0271(9) 0.0006(8) -0.0067(7) -0.0067(8)  
W55 0.0240(9) 0.0364(11) 0.0402(11) 0.0056(9) -0.0060(8) -0.0071(8)  
W56 0.0212(9) 0.0319(10) 0.0356(10) 0.0042(8) 0.0083(8) 0.0008(8)  
W57 0.0333(10) 0.0327(10) 0.0213(9) -0.0052(8) 0.0084(7) 0.0031(8)  
W58 0.0347(11) 0.0313(11) 0.0409(11) -0.0075(9) 0.0118(9) 0.0094(8)  
W59 0.0196(9) 0.0250(10) 0.0443(11) 0.0051(8) -0.0002(8) 0.0066(7)  
W60 0.0184(9) 0.0361(11) 0.0538(12) 0.0076(9) 0.0049(8) 0.0053(8)  
W61 0.0152(8) 0.0150(8) 0.0118(7) 0.0049(6) 0.0028(6) 0.0022(6)  
W62 0.0211(8) 0.0144(8) 0.0178(8) 0.0055(6) 0.0064(7) 0.0022(7)  
W63 0.0345(10) 0.0215(9) 0.0279(9) 0.0014(7) 0.0018(8) -0.0068(8)  
W64 0.0200(9) 0.0182(9) 0.0222(8) 0.0057(7) 0.0067(7) -0.0011(7)  
W65 0.0297(9) 0.0199(9) 0.0183(8) 0.0038(7) 0.0099(7) 0.0004(7)  
W66 0.0425(11) 0.0196(9) 0.0237(9) 0.0062(7) 0.0110(8) -0.0028(8)  
W67 0.0603(13) 0.0174(9) 0.0352(10) 0.0059(8) 0.0115(9) -0.0070(9)  
W68 0.0550(13) 0.0209(10) 0.0359(10) -0.0020(8) 0.0015(9) -0.0064(9)  
W69 0.0404(11) 0.0367(11) 0.0481(12) 0.0019(9) -0.0026(9) -0.0189(9)  
W70 0.0496(12) 0.0268(10) 0.0455(12) 0.0070(9) 0.0123(9) -0.0178(9)  
W71 0.0263(10) 0.0302(10) 0.0431(11) 0.0055(9) 0.0114(8) -0.0078(8)  
W72 0.0441(11) 0.0173(9) 0.0229(9) 0.0043(7) 0.0086(8) 0.0073(8)  
W73 0.0464(12) 0.0166(9) 0.0407(11) 0.0011(8) 0.0133(9) 0.0047(8)  
W74 0.0308(10) 0.0186(9) 0.0253(9) -0.0031(7) 0.0014(7) 0.0027(7)  
W75 0.0294(9) 0.0181(9) 0.0253(9) -0.0019(7) 0.0020(7) 0.0039(7)  
W76 0.0348(11) 0.0350(11) 0.0381(11) -0.0163(9) -0.0051(8) 0.0097(8)  
W77 0.0530(13) 0.0579(14) 0.0240(10) -0.0093(9) -0.0075(9) 0.0246(11)  
W78 0.0600(13) 0.0281(11) 0.0290(10) 0.0132(8) 0.0128(9) 0.0172(9)  
W79 0.0584(13) 0.0358(11) 0.0286(10) 0.0063(9) 0.0009(9) 0.0269(10)  
W80 0.0438(11) 0.0138(9) 0.0320(10) -0.0020(8) 0.0059(8) 0.0087(8)  
W81 0.0350(10) 0.0263(10) 0.0319(10) -0.0060(8) -0.0023(8) 0.0141(8)  
W82 0.116(3) 0.103(3) 0.103(2) -0.018(2) 0.002(2) 0.010(2)

\_geom\_special\_details

;

All esds (except the esd in the dihedral angle between two l.s. planes) are estimated using the full covariance matrix. The cell esds are taken into account individually in the estimation of esds in distances, angles and torsion angles; correlations between esds in cell parameters are only used when they are defined by crystal symmetry. An approximate (isotropic) treatment of cell esds is used for estimating esds involving l.s.

planes.

;

```
loop_
  _geom_bond_atom_site_label_1
  _geom_bond_atom_site_label_2
  _geom_bond_distance
  _geom_bond_site_symmetry_2
  _geom_bond_publ_flag
O1 W1 1.68(3) . ?
O2 W2 1.73(3) . ?
O2 Na10 2.78(3) 1_655 ?
O3 W3 1.75(2) . ?
O4 W4 1.71(2) . ?
O4 Na20 2.71(3) . ?
O5 W5 1.75(3) . ?
O5 Cs1 3.14(3) 1_655 ?
O6 W6 1.72(2) . ?
O6 Na4 2.99(3) . ?
O7 W7 1.752(19) . ?
O8 W8 1.74(2) . ?
O9 W9 1.69(2) . ?
O10 W1 1.92(2) . ?
O10 W2 1.93(2) . ?
O11 W3 1.86(2) . ?
O11 W2 2.02(2) . ?
O11 K4 2.96(2) 1_655 ?
O12 W3 1.89(2) . ?
O12 W1 1.96(2) . ?
O13 W1 1.90(2) . ?
O13 W7 2.06(2) . ?
O13 Cs5 3.36(2) . ?
O14 W2 1.83(2) . ?
O14 W6 2.11(2) . ?
O14 Na3 2.91(3) 1_655 ?
O15 W2 1.90(2) . ?
O15 W5 2.01(2) . ?
O15 K4 2.85(2) 1_655 ?
O15 Na5 2.85(3) . ?
O16 W3 1.85(2) . ?
O16 W4 2.08(2) . ?
O16 K4 3.07(2) 1_655 ?
O17 W9 1.88(2) . ?
O17 W3 1.99(2) . ?
O18 W1 1.84(2) . ?
O18 W8 2.02(2) . ?
O18 Cs5 3.45(2) . ?
O19 W8 1.90(2) . ?
O19 W7 1.96(2) . ?
O19 Cs5 3.42(2) . ?
O20 W6 1.90(2) . ?
O20 W7 1.92(2) . ?
O21 W6 1.93(2) . ?
O21 W5 1.93(2) . ?
O21 Na4 2.92(3) . ?
O22 W5 1.90(2) . ?
O22 W4 1.95(2) . ?
O22 K4 2.84(3) 1_655 ?
O23 W9 1.90(2) . ?
O23 W4 1.97(2) . ?
O23 Na20 2.93(3) . ?
O24 W9 1.91(2) . ?
O24 W8 1.94(2) . ?
O25 As1 1.842(19) . ?
```



O25 W3 2.28(2) . ?  
O25 W9 2.301(19) . ?  
O25 W4 2.32(2) . ?  
O26 As1 1.79(2) . ?  
O26 W6 2.26(2) . ?  
O26 W5 2.37(2) . ?  
O26 W2 2.39(2) . ?  
O27 As1 1.83(2) . ?  
O27 W7 2.30(2) . ?  
O27 W1 2.32(2) . ?  
O27 W8 2.38(2) . ?  
O28 W7 1.78(2) . ?  
O28 Gd1 2.34(2) . ?  
O29 W6 1.76(2) . ?  
O29 Gd1 2.40(2) . ?  
O30 W5 1.76(2) . ?  
O31 W4 1.78(2) . ?  
O32 W10 1.91(2) . ?  
O32 W9 1.93(2) . ?  
O33 W8 1.78(2) . ?  
O33 W10 2.07(2) . ?  
O34 W10 1.77(2) . ?  
O34 Gd1 2.32(2) . ?  
O35 W10 1.76(2) . ?  
O35 Gd2 2.28(2) . ?  
O36 Gd1 2.41(2) . ?  
O37 Gd1 2.42(2) . ?  
O37 Cs2 3.14(2) . ?  
O38 Gd1 2.46(3) . ?  
O38 Cs5 3.32(3) 2\_655 ?  
O39 W11 1.79(2) . ?  
O39 W10 2.16(2) . ?  
O40 W12 1.88(2) . ?  
O40 W10 1.94(2) . ?  
O41 W12 1.867(18) . ?  
O41 W11 1.960(18) . ?  
O42 W11 1.91(2) . ?  
O42 W16 2.00(2) . ?  
O42 Cs7 3.37(2) . ?  
O43 W15 1.88(2) . ?  
O43 W16 1.92(2) . ?  
O44 W14 1.92(2) . ?  
O44 W15 1.93(2) . ?  
O45 W13 1.91(2) . ?  
O45 W14 1.943(19) . ?  
O45 Cs4 3.294(19) 2 ?  
O46 W13 1.92(2) . ?  
O46 W12 1.95(2) . ?  
O47 As2 1.821(19) . ?  
O47 W18 2.25(2) . ?  
O47 W13 2.293(19) . ?  
O47 W12 2.33(2) . ?  
O48 As2 1.79(2) . ?  
O48 W16 2.29(2) . ?  
O48 W17 2.35(2) . ?  
O48 W11 2.44(2) . ?  
O49 As2 1.78(2) . ?  
O49 W15 2.28(2) . ?  
O49 W19 2.35(2) . ?  
O49 W14 2.41(2) . ?  
O50 W11 1.67(3) . ?  
O50 Na25 2.88(3) 1\_565 ?  
O50 Cs7 3.63(3) . ?  
O51 W16 1.71(2) . ?

O52 W16 1.82 (2) . ?  
O52 Gd2 2.33 (2) . ?  
O53 W15 1.78 (2) . ?  
O53 Gd2 2.38 (2) . ?  
O54 W15 1.75 (2) . ?  
O54 Na24 2.86 (3) . ?  
O55 W14 1.78 (2) . ?  
O55 W20 2.15 (2) . ?  
O56 W14 1.68 (2) . ?  
O56 Cs4 3.30 (2) 2 ?  
O57 W20 1.88 (2) . ?  
O57 W13 1.96 (2) . ?  
O58 W13 1.72 (2) . ?  
O58 Cs4 3.11 (2) 2 ?  
O59 W12 1.73 (3) . ?  
O60 W12 1.905 (19) . ?  
O60 W18 1.95 (2) . ?  
O61 W17 1.86 (2) . ?  
O61 W11 2.04 (2) . ?  
O61 Cs7 3.01 (2) . ?  
O62 W17 1.79 (3) . ?  
O62 W16 2.10 (3) . ?  
O62 Cs7 3.41 (3) . ?  
O63 W19 1.88 (2) . ?  
O63 W15 2.04 (2) . ?  
O64 W19 1.85 (2) . ?  
O64 W14 2.04 (2) . ?  
O65 W13 1.92 (2) . ?  
O65 W18 1.97 (2) . ?  
O66 W18 1.86 (2) . ?  
O66 W19 2.02 (2) . ?  
O66 Cs4 3.19 (2) . ?  
O67 W19 1.87 (2) . ?  
O67 W17 1.95 (2) . ?  
O68 W18 1.84 (2) . ?  
O68 W17 1.99 (2) . ?  
O69 W19 1.71 (2) . ?  
O69 Cs4 3.34 (2) . ?  
O70 W18 1.70 (2) . ?  
O70 Cs4 3.33 (2) . ?  
O71 W17 1.73 (3) . ?  
O71 Cs7 3.73 (3) . ?  
O72 W20 1.79 (2) . ?  
O72 Gd1 2.45 (2) . ?  
O72 Cs2 3.74 (2) . ?  
O73 W20 1.75 (2) . ?  
O73 Gd2 2.33 (2) . ?  
O74 Gd2 2.37 (2) . ?  
O75 Gd2 2.53 (3) . ?  
O75 Na20 3.02 (4) . ?  
O76 Gd2 2.50 (2) . ?  
O76 Cs2 3.51 (3) . ?  
O77 W23 1.72 (2) . ?  
O77 Gd1 2.38 (2) . ?  
O78 W22 1.90 (2) . ?  
O78 W23 1.92 (2) . ?  
O78 Cs5 3.24 (2) 2\_655 ?  
O79 W22 1.74 (2) . ?  
O79 Cs4 3.14 (2) 2 ?  
O80 W22 1.93 (2) . ?  
O80 W21 1.932 (19) . ?  
O81 W22 1.87 (2) . ?  
O81 W27 1.94 (2) . ?  
O82 W27 1.91 (2) . ?

O82 W31 1.91(2) . ?  
O83 W27 1.71(2) . ?  
O84 W27 1.87(2) . ?  
O84 W26 1.96(2) . ?  
O85 W26 1.81(2) . ?  
O85 W31 2.10(2) . ?  
O86 W26 1.75(2) . ?  
O86 Cs7 3.06(2) 1\_545 ?  
O87 W26 1.92(2) . ?  
O87 W25 1.96(2) . ?  
O88 W25 1.74(2) . ?  
O88 Gd3 2.43(2) . ?  
O89 W25 1.74(2) . ?  
O89 Na7 2.43(3) . ?  
O90 W25 1.90(2) . ?  
O90 W24 1.91(2) . ?  
O91 W24 1.76(2) . ?  
O91 Gd3 2.39(2) . ?  
O91 Cs2 3.63(2) . ?  
O92 W24 1.72(2) . ?  
O93 W23 1.91(2) . ?  
O93 W24 2.00(2) . ?  
O93 Cs2 3.459(19) . ?  
O94 W29 1.90(2) . ?  
O94 W23 1.98(2) . ?  
O94 Cs5 3.27(2) 2\_655 ?  
O95 W22 1.936(19) . ?  
O95 W28 1.94(2) . ?  
O95 Cs5 3.32(2) 2\_655 ?  
O96 W27 1.87(2) . ?  
O96 W28 1.99(2) . ?  
O97 W30 1.89(2) . ?  
O97 W26 2.00(2) . ?  
O98 W30 1.83(2) . ?  
O98 W25 2.06(2) . ?  
O99 W29 1.825(19) . ?  
O99 W24 2.093(19) . ?  
O100 As3 1.82(2) . ?  
O100 W25 2.24(2) . ?  
O100 W30 2.374(19) . ?  
O100 W26 2.43(2) . ?  
O101 As3 1.81(2) . ?  
O101 W22 2.29(2) . ?  
O101 W28 2.30(2) . ?  
O101 W27 2.30(2) . ?  
O102 As3 1.82(2) . ?  
O102 W24 2.29(2) . ?  
O102 W23 2.31(2) . ?  
O102 W29 2.38(2) . ?  
O103 W28 1.86(2) . ?  
O103 W30 1.97(2) . ?  
O104 W28 1.83(2) . ?  
O104 W29 1.99(2) . ?  
O104 Cs5 3.49(2) 2\_655 ?  
O105 W30 1.88(2) . ?  
O105 W29 1.93(2) . ?  
O106 W30 1.77(2) . ?  
O107 W28 1.68(2) . ?  
O108 W29 1.69(2) . ?  
O109 W21 1.92(2) . ?  
O109 W20 1.99(2) . ?  
O109 Na1 2.93(3) . ?  
O109 Cs2 3.13(2) . ?  
O110 W20 2.100(19) . ?

O110 W21 2.16 (2) . ?  
O110 Cs4 3.72 (2) 2 ?  
O111 W21 1.74 (2) . ?  
O111 Gd3 2.40 (2) . ?  
O111 Cs2 3.715 (19) . ?  
O112 Gd3 2.40 (2) . ?  
O112 Cs3 3.49 (2) . ?  
O113 W43 1.77 (2) . ?  
O113 Gd3 2.48 (2) . ?  
O113 Cs2 3.12 (2) . ?  
O114 W31 1.76 (2) . ?  
O114 Gd3 2.30 (2) . ?  
O115 W41 1.75 (2) . ?  
O115 Gd3 2.37 (2) . ?  
O115 Cs3 3.38 (2) . ?  
O116 Gd4 2.43 (2) . ?  
O116 Na1 2.82 (3) . ?  
O117 W31 1.76 (2) . ?  
O117 Gd4 2.29 (2) . ?  
O118 W41 1.78 (2) . ?  
O118 Gd4 2.33 (2) . ?  
O119 W33 1.89 (2) . ?  
O119 W32 1.94 (2) . ?  
O119 Cs7 3.07 (2) 1\_545 ?  
O120 W21 1.76 (2) . ?  
O120 Gd4 2.41 (2) . ?  
O121 Gd4 2.47 (2) . ?  
O121 Cs4 3.21 (2) 2 ?  
O122 Gd4 2.44 (2) . ?  
O123 W36 1.77 (2) . ?  
O123 Gd4 2.36 (2) . ?  
O124 W37 1.74 (2) . ?  
O124 Gd4 2.40 (2) . ?  
O125 W32 1.79 (2) . ?  
O125 W31 2.13 (2) . ?  
O126 W33 1.92 (2) . ?  
O126 W31 1.93 (2) . ?  
O127 W34 1.92 (2) . ?  
O127 W41 1.927 (19) . ?  
O128 W35 1.802 (19) . ?  
O128 W41 2.123 (18) . ?  
O129 W35 1.73 (2) . ?  
O129 Cs6 3.24 (2) . ?  
O129 Cs1 3.25 (2) . ?  
O130 W34 1.90 (2) . ?  
O130 W35 1.92 (2) . ?  
O131 W34 1.72 (2) . ?  
O131 Cs3 3.11 (2) . ?  
O132 W34 1.89 (2) . ?  
O132 W33 1.97 (2) . ?  
O133 W33 1.69 (2) . ?  
O133 Cs7 3.08 (3) 1\_545 ?  
O134 W53 1.88 (2) . ?  
O134 W52 1.94 (2) . ?  
O135 W32 1.72 (3) . ?  
O135 Cs7 3.27 (3) 1\_545 ?  
O136 W32 1.90 (2) . ?  
O136 W37 2.01 (2) . ?  
O137 W37 1.72 (2) . ?  
O138 W36 1.91 (2) . ?  
O138 W37 1.93 (2) . ?  
O139 W36 1.74 (2) . ?  
O139 Na3 2.79 (3) . ?  
O139 Na5 2.90 (3) 1\_455 ?

O139 Na4 2.92 (3) 1\_455 ?  
O140 W35 1.94 (2) . ?  
O140 W36 1.95 (2) . ?  
O140 Cs1 3.27 (2) . ?  
O141 As4 1.82 (2) . ?  
O141 W36 2.28 (2) . ?  
O141 W39 2.31 (2) . ?  
O141 W35 2.37 (2) . ?  
O142 As4 1.80 (3) . ?  
O142 W34 2.28 (2) . ?  
O142 W40 2.28 (3) . ?  
O142 W33 2.35 (2) . ?  
O143 As4 1.86 (2) . ?  
O143 W37 2.23 (2) . ?  
O143 W38 2.36 (2) . ?  
O143 W32 2.41 (2) . ?  
O144 W38 1.90 (2) . ?  
O144 W32 1.98 (3) . ?  
O145 W38 1.87 (2) . ?  
O145 W37 2.04 (2) . ?  
O146 W39 1.84 (2) . ?  
O146 W36 2.02 (2) . ?  
O146 Na4 2.96 (3) 1\_455 ?  
O147 W39 1.91 (2) . ?  
O147 W35 1.99 (2) . ?  
O148 W34 1.88 (2) . ?  
O148 W40 1.97 (2) . ?  
O149 W33 1.89 (2) . ?  
O149 W40 1.97 (2) . ?  
O150 W40 1.85 (2) . ?  
O150 W38 1.97 (2) . ?  
O151 W39 1.90 (2) . ?  
O151 W38 1.93 (2) . ?  
O152 W40 1.87 (2) . ?  
O152 W39 1.97 (2) . ?  
O153 W40 1.69 (3) . ?  
O154 W39 1.73 (2) . ?  
O155 W38 1.73 (3) . ?  
O156 Gd3 2.47 (2) . ?  
O156 Cs3 3.202 (18) . ?  
O157 W23 1.77 (2) . ?  
O157 W21 2.22 (2) . ?  
O157 Cs2 3.17 (2) . ?  
O158 W42 1.76 (2) . ?  
O158 Gd2 2.46 (2) . ?  
O158 Na1 2.94 (3) . ?  
O159 W42 1.70 (2) . ?  
O159 Gd5 2.46 (2) . ?  
O160 W42 1.90 (2) . ?  
O160 W43 1.94 (2) . ?  
O160 Cs2 3.30 (2) . ?  
O161 W43 1.74 (2) . ?  
O161 Gd5 2.39 (2) . ?  
O161 Cs3 3.60 (2) . ?  
O162 W43 1.92 (2) . ?  
O162 W44 1.98 (2) . ?  
O162 Cs3 3.27 (2) . ?  
O163 W44 1.81 (2) . ?  
O163 W61 2.14 (2) . ?  
O163 Cs3 3.12 (2) . ?  
O164 W44 1.74 (2) . ?  
O165 W44 1.89 (2) . ?  
O165 W45 1.93 (2) . ?  
O166 W45 1.89 (2) . ?

O166 W61 1.99(2) . ?  
O167 W45 1.72(3) . ?  
O167 K3 3.24(3) 2\_546 ?  
O168 W45 1.93(2) . ?  
O168 W46 1.97(2) . ?  
O168 Na21 2.96(3) . ?  
O169 W61 1.772(19) . ?  
O169 Gd6 2.393(19) . ?  
O169 K3 2.97(2) 2\_546 ?  
O170 W46 1.84(2) . ?  
O170 W47 1.97(2) . ?  
O170 Na22 2.92(3) 1\_565 ?  
O171 W47 1.81(2) . ?  
O171 W51 2.10(2) . ?  
O172 W47 1.71(3) . ?  
O173 W47 1.932(19) . ?  
O173 W42 1.972(19) . ?  
O174 As5 1.80(2) . ?  
O174 W50 2.26(2) . ?  
O174 W46 2.34(2) . ?  
O174 W45 2.37(2) . ?  
O175 As5 1.82(2) . ?  
O175 W43 2.26(2) . ?  
O175 W49 2.35(2) . ?  
O175 W44 2.38(2) . ?  
O176 As5 1.78(2) . ?  
O176 W42 2.21(2) . ?  
O176 W47 2.46(2) . ?  
O176 W48 2.49(2) . ?  
O177 W48 1.89(2) . ?  
O177 W47 1.97(2) . ?  
O177 Na22 2.97(3) 1\_565 ?  
O178 W48 1.88(2) . ?  
O178 W42 2.03(2) . ?  
O179 W49 1.85(2) . ?  
O179 W43 2.07(2) . ?  
O179 Cs2 3.58(2) . ?  
O180 W49 1.88(2) . ?  
O180 W44 1.99(2) . ?  
O181 W50 1.92(2) . ?  
O181 W45 1.94(2) . ?  
O182 W46 1.84(2) . ?  
O182 W50 2.04(2) . ?  
O183 W50 1.79(2) . ?  
O183 W49 2.05(2) . ?  
O184 W49 1.900(19) . ?  
O184 W48 1.907(19) . ?  
O185 W50 1.89(3) . ?  
O185 W48 1.95(2) . ?  
O186 W50 1.71(3) . ?  
O187 W49 1.71(2) . ?  
O188 W48 1.72(3) . ?  
O189 Gd5 2.53(2) . ?  
O189 Na24 2.72(3) . ?  
O190 W61 1.76(2) . ?  
O190 Gd5 2.39(2) . ?  
O191 Gd5 2.45(2) . ?  
O192 W41 2.05(2) . ?  
O192 Gd5 2.38(2) . ?  
O192 Cs3 3.13(2) . ?  
O193 W51 1.74(2) . ?  
O193 Gd5 2.32(2) . ?  
O194 W41 1.99(2) . ?  
O194 Gd5 2.34(2) . ?

O194 Na1 2.86(3) . ?  
O195 W51 1.81(2) . ?  
O195 Gd6 2.27(2) . ?  
O196 W46 1.90(2) . ?  
O196 W51 1.90(2) . ?  
O197 W51 1.89(2) . ?  
O197 W53 1.94(2) . ?  
O198 W52 1.82(2) . ?  
O198 W51 2.07(2) . ?  
O199 W52 1.69(3) . ?  
O199 Na16 2.90(4) 1\_565 ?  
O200 W52 1.94(2) . ?  
O200 W57 1.98(2) . ?  
O201 W57 1.79(2) . ?  
O201 Gd6 2.33(2) . ?  
O202 W57 1.70(3) . ?  
O203 W57 1.89(3) . ?  
O203 W56 1.90(2) . ?  
O204 W56 1.80(2) . ?  
O204 Gd6 2.34(2) . ?  
O205 W56 1.75(3) . ?  
O206 W56 1.90(2) . ?  
O206 W55 1.96(3) . ?  
O207 W55 1.72(3) . ?  
O207 Cs1 3.36(3) . ?  
O208 W55 1.79(2) . ?  
O208 Cs6 3.30(3) . ?  
O209 W54 1.93(2) . ?  
O209 W55 1.94(2) . ?  
O209 Cs1 3.47(2) . ?  
O210 W54 1.68(3) . ?  
O210 Na10 2.62(3) . ?  
O210 K4 3.15(3) . ?  
O210 Cs1 3.21(3) . ?  
O211 W54 1.77(2) . ?  
O212 W53 1.92(2) . ?  
O212 W54 1.92(2) . ?  
O213 W53 1.75(3) . ?  
O214 As6 1.82(2) . ?  
O214 W54 2.29(2) . ?  
O214 W53 2.31(2) . ?  
O214 W59 2.31(2) . ?  
O215 As6 1.79(2) . ?  
O215 W57 2.28(2) . ?  
O215 W58 2.37(2) . ?  
O215 W52 2.42(3) . ?  
O216 As6 1.77(2) . ?  
O216 W56 2.30(2) . ?  
O216 W55 2.32(2) . ?  
O216 W60 2.39(2) . ?  
O217 W60 1.77(2) . ?  
O217 W55 2.06(2) . ?  
O218 W59 1.89(2) . ?  
O218 W54 2.06(2) . ?  
O218 K4 2.76(2) . ?  
O219 W53 1.92(2) . ?  
O219 W59 1.99(2) . ?  
O220 W58 1.86(3) . ?  
O220 W52 2.03(2) . ?  
O221 W58 1.87(3) . ?  
O221 W57 2.01(2) . ?  
O222 W60 1.87(3) . ?  
O222 W56 2.04(3) . ?  
O223 W60 1.86(2) . ?

O223 W58 1.96 (3) . ?  
O224 W59 1.85 (3) . ?  
O224 W58 2.00 (3) . ?  
O225 W59 1.86 (3) . ?  
O225 W60 1.96 (3) . ?  
O226 W59 1.72 (3) . ?  
O226 Na9 2.33 (3) . ?  
O227 W58 1.74 (3) . ?  
O228 W60 1.73 (3) . ?  
O228 Na6 2.99 (3) 1\_465 ?  
O229 Gd6 2.42 (2) . ?  
O229 Cs6 3.21 (2) . ?  
O230 Gd6 2.47 (3) . ?  
O230 K3 3.43 (3) 2\_546 ?  
O231 W64 1.77 (2) . ?  
O231 Gd6 2.41 (2) . ?  
O232 Gd6 2.45 (2) . ?  
O232 K3 3.08 (3) 2\_546 ?  
O233 W62 1.94 (2) . ?  
O233 W63 1.94 (2) . ?  
O234 W64 1.80 (2) . ?  
O234 W62 2.19 (2) . ?  
O234 K3 2.82 (2) 2\_546 ?  
O235 W64 1.93 (2) . ?  
O235 W65 1.93 (2) . ?  
O235 K3 3.03 (3) 2\_546 ?  
O236 W65 1.78 (2) . ?  
O236 Gd7 2.35 (2) . ?  
O236 K3 3.34 (2) 2\_546 ?  
O237 W65 1.78 (2) . ?  
O237 Gd7 2.34 (2) 2\_546 ?  
O238 W65 1.91 (3) . ?  
O238 W66 1.95 (2) . ?  
O239 W66 1.78 (2) . ?  
O239 Gd7 2.34 (2) . ?  
O240 W66 1.70 (2) . ?  
O240 K3 2.67 (2) . ?  
O241 W67 1.90 (2) . ?  
O241 W66 1.93 (2) . ?  
O242 W67 1.78 (3) . ?  
O242 W72 2.09 (3) . ?  
O243 W67 1.72 (3) . ?  
O244 W67 1.90 (3) . ?  
O244 W68 1.94 (3) . ?  
O245 W72 1.87 (3) . ?  
O245 W68 1.95 (3) . ?  
O246 W68 1.71 (3) . ?  
O247 W68 1.93 (3) . ?  
O247 W63 1.96 (2) . ?  
O248 W63 1.67 (2) . ?  
O248 Cs6 3.39 (2) . ?  
O249 W71 1.92 (3) . ?  
O249 W64 2.02 (2) . ?  
O250 W71 1.89 (2) . ?  
O250 W65 2.05 (2) . ?  
O251 W70 1.82 (2) . ?  
O251 W66 2.07 (3) . ?  
O252 W70 1.85 (3) . ?  
O252 W67 2.00 (3) . ?  
O253 W69 1.94 (3) . ?  
O253 W68 1.94 (3) . ?  
O254 W63 1.88 (3) . ?  
O254 W69 1.97 (3) . ?  
O255 W69 1.84 (2) . ?



O255 W71 2.00 (2) . ?  
O256 W71 1.84 (3) . ?  
O256 W70 1.97 (3) . ?  
O257 W69 1.87 (3) . ?  
O257 W70 1.95 (3) . ?  
O258 W70 1.79 (3) . ?  
O259 W71 1.71 (3) . ?  
O260 W69 1.71 (3) . ?  
O261 W72 1.74 (2) . ?  
O261 Gd7 2.29 (2) . ?  
O262 W62 1.76 (2) . ?  
O262 Gd7 2.40 (2) . ?  
O263 Gd7 2.45 (3) . ?  
O263 K3 2.85 (3) 2\_546 ?  
O264 Gd7 2.51 (3) . ?  
O265 W82 1.85 (2) . ?  
O265 Gd7 2.38 (2) . ?  
O266 W82 2.10 (7) . ?  
O267 W82 2.30 (6) . ?  
O268 W77 1.81 (3) . ?  
O268 W82 1.94 (3) . ?  
O269 W77 1.69 (3) . ?  
O270 W77 1.91 (3) . ?  
O270 W76 1.92 (3) . ?  
O271 W76 1.76 (3) . ?  
O271 W82 2.22 (3) . ?  
O272 W82 1.84 (3) . ?  
O272 Gd8 2.32 (3) . ?  
O273 W76 1.67 (3) . ?  
O274 W76 1.93 (2) . ?  
O274 W75 1.95 (2) . ?  
O275 W75 1.74 (3) . ?  
O275 Gd8 2.40 (3) . ?  
O276 W75 1.68 (3) . ?  
O276 Na7 2.54 (3) . ?  
O277 W75 1.89 (2) . ?  
O277 W74 1.94 (2) . ?  
O278 W74 1.77 (2) . ?  
O278 Gd8 2.39 (2) . ?  
O279 W74 1.71 (2) . ?  
O280 W73 1.92 (2) . ?  
O280 W74 1.98 (2) . ?  
O281 W73 1.80 (2) . ?  
O281 W72 2.08 (2) . ?  
O282 W73 1.71 (3) . ?  
O282 Na16 2.66 (4) . ?  
O283 W73 1.86 (3) . ?  
O283 W78 1.94 (3) . ?  
O284 W78 1.88 (2) . ?  
O284 W72 1.95 (2) . ?  
O285 W78 1.71 (3) . ?  
O286 W78 1.91 (3) . ?  
O286 W77 2.00 (3) . ?  
O287 As8 1.81 (2) . ?  
O287 W79 2.27 (2) . ?  
O287 W78 2.32 (3) . ?  
O287 W77 2.35 (2) . ?  
O288 As8 1.81 (2) . ?  
O288 W75 2.28 (2) . ?  
O288 W81 2.33 (2) . ?  
O288 W76 2.38 (2) . ?  
O289 As8 1.75 (2) . ?  
O289 W74 2.28 (2) . ?  
O289 W80 2.40 (2) . ?

O289 W73 2.46(2) . ?  
O290 W80 1.85(2) . ?  
O290 W74 2.03(2) . ?  
O290 Na20 2.84(3) 1\_545 ?  
O291 W80 1.90(2) . ?  
O291 W73 2.02(2) . ?  
O291 Na22 2.73(3) . ?  
O292 W78 1.88(3) . ?  
O292 W79 2.01(3) . ?  
O293 W79 1.93(3) . ?  
O293 W77 1.95(3) . ?  
O294 W81 1.82(3) . ?  
O294 W75 2.11(2) . ?  
O295 W81 1.83(2) . ?  
O295 W76 2.07(2) . ?  
O296 W81 1.91(2) . ?  
O296 W80 1.91(3) . ?  
O297 W79 1.91(3) . ?  
O297 W81 1.93(2) . ?  
O298 W79 1.89(3) . ?  
O298 W80 1.94(3) . ?  
O299 W79 1.74(3) . ?  
O300 W81 1.73(2) . ?  
O300 Na9 2.37(3) 1\_645 ?  
O301 W80 1.68(3) . ?  
O302 W72 1.70(2) . ?  
O302 Gd8 2.33(2) . ?  
O303 Gd8 2.46(3) . ?  
O304 Gd8 2.38(3) . ?  
O304 Cs3 3.31(3) . ?  
O305 Gd8 2.40(3) . ?  
O305 Cs3 3.36(3) . ?  
O306 W62 1.73(2) . ?  
O306 Gd8 2.51(2) . ?  
O306 Cs3 3.26(2) . ?  
O307 W61 1.93(2) . ?  
O307 W62 2.08(2) . ?  
O307 Cs3 3.27(2) . ?  
O308 W62 1.98(2) . ?  
O308 W61 2.14(2) . ?  
O308 K3 2.81(2) 2\_546 ?  
O309 W63 1.89(2) . ?  
O309 W64 1.93(2) . ?  
O309 Cs6 3.62(2) . ?  
O318 O340 1.46(7) 1\_465 ?  
O319 Cs1 3.40(5) . ?  
O320 Na3 2.91(3) . ?  
O321 Na3 2.95(3) . ?  
O324 Cs4 3.316(2) . ?  
O324 Cs4 3.316(2) 2 ?  
O326 Cs4 3.40(4) 2 ?  
O335 Na16 2.82(4) . ?  
O339 Na6 2.15(5) . ?  
O340 O318 1.46(7) 1\_645 ?  
O343 Na23 2.89(5) . ?  
O345 Na9 2.43(4) 1\_645 ?  
O346 Na10 2.35(4) . ?  
O347 Na9 2.36(4) 1\_645 ?  
O348 Na9 2.25(6) 1\_645 ?  
O348 K4 3.22(6) 1\_645 ?  
O349 Na7 2.37(4) . ?  
O350 Na7 2.37(5) . ?  
O351 Na7 2.43(3) . ?  
O354 Cs7 2.46(2) . ?

O358 K4 2.76(4) 1\_655 ?  
O359 Cs2 3.68(6) . ?  
O360 Cs6 2.52(5) . ?  
O361 As7 1.82(2) . ?  
O361 W65 2.26(2) . ?  
O361 W64 2.35(2) . ?  
O361 W71 2.37(2) . ?  
O362 As7 1.78(3) . ?  
O362 W66 2.29(2) . ?  
O362 W70 2.36(3) . ?  
O362 W67 2.52(2) . ?  
O363 As7 1.76(2) . ?  
O363 W69 2.32(2) . ?  
O363 W68 2.35(2) . ?  
O363 W63 2.37(2) . ?  
O366 Na4 2.92(4) . ?  
O368 Na4 2.86(6) . ?  
O373 W46 1.74(3) . ?  
O373 Na16 2.95(4) 1\_565 ?  
O374 Na20 3.00(6) . ?  
O375 Na9 2.41(4) 1\_645 ?  
O376 Na10 2.34(4) . ?  
O377 Na10 2.50(3) . ?  
O378 Cs2 3.73(3) . ?  
O379 Na25 2.17(3) . ?  
O381 Cs7 3.47(5) . ?  
O384 Na8 0.57(7) . ?  
O384 Na7 2.25(3) . ?  
Na1 Na24 4.09(2) . ?  
Na1 Cs2 4.930(16) . ?  
Na2 Na2 2.39(3) 2\_645 ?  
Na3 Na11 2.46(2) . ?  
Na3 O14 2.91(3) 1\_455 ?  
Na3 Na5 3.98(2) 1\_455 ?  
Na4 O139 2.92(3) 1\_655 ?  
Na4 O146 2.96(3) 1\_655 ?  
Na4 Cs1 4.970(17) 1\_655 ?  
Na5 Na10 2.11(3) 1\_655 ?  
Na5 O139 2.90(3) 1\_655 ?  
Na5 Cs1 2.99(2) 1\_655 ?  
Na5 Na3 3.98(2) 1\_655 ?  
Na6 O228 2.99(3) 1\_645 ?  
Na6 Na23 3.91(3) . ?  
Na6 Na22 4.04(3) . ?  
Na7 Na8 2.59(7) . ?  
Na8 O398 2.76(7) . ?  
Na9 O348 2.25(6) 1\_465 ?  
Na9 O347 2.36(4) 1\_465 ?  
Na9 O300 2.37(3) 1\_465 ?  
Na9 O375 2.41(4) 1\_465 ?  
Na9 O345 2.43(4) 1\_465 ?  
Na9 K4 4.48(2) . ?  
Na10 Na5 2.11(3) 1\_455 ?  
Na10 O2 2.78(3) 1\_455 ?  
Na10 Cs1 4.38(2) . ?  
Na10 K4 4.51(2) . ?  
Na11 O394 2.50(4) . ?  
Na12 Cs6 3.29(2) . ?  
Na16 O199 2.90(4) 1\_545 ?  
Na16 O373 2.95(4) 1\_545 ?  
Na16 Na22 3.06(4) . ?  
K3 O308 2.81(2) 2\_546 ?  
K3 O234 2.82(2) 2\_546 ?  
K3 O263 2.85(3) 2\_546 ?

K3 O169 2.97(2) 2\_546 ?  
K3 O235 3.03(3) 2\_546 ?  
K3 O232 3.08(3) 2\_546 ?  
K3 O167 3.24(3) 2\_546 ?  
K3 O236 3.34(2) 2\_546 ?  
K3 O230 3.43(3) 2\_546 ?  
K3 W64 3.720(10) 2\_546 ?  
K3 W61 3.800(9) 2\_546 ?  
K4 O358 2.76(4) 1\_455 ?  
K4 O22 2.84(3) 1\_455 ?  
K4 O15 2.85(2) 1\_455 ?  
K4 O11 2.96(2) 1\_455 ?  
K4 O16 3.07(2) 1\_455 ?  
K4 O348 3.22(6) 1\_465 ?  
K4 W5 3.782(10) 1\_455 ?  
K4 W3 3.865(9) 1\_455 ?  
K4 W54 3.890(9) . ?  
K4 W2 3.925(9) 1\_455 ?  
Cs1 Na5 2.99(2) 1\_455 ?  
Cs1 O5 3.14(3) 1\_455 ?  
Cs1 W54 3.955(4) . ?  
Cs1 W35 4.035(3) . ?  
Cs1 W55 4.076(4) . ?  
Cs5 O393 3.13(3) 2\_655 ?  
Cs5 O78 3.24(2) 2\_655 ?  
Cs5 O94 3.27(2) 2\_655 ?  
Cs5 O38 3.32(3) 2\_655 ?  
Cs5 O95 3.32(2) 2\_655 ?  
Cs5 O104 3.49(2) 2\_655 ?  
Cs5 W22 4.171(4) 2\_655 ?  
Cs5 W1 4.171(4) . ?  
Cs5 W23 4.177(4) 2\_655 ?  
Cs4 O58 3.11(2) 2 ?  
Cs4 O79 3.14(2) 2 ?  
Cs4 O121 3.21(2) 2 ?  
Cs4 O45 3.294(19) 2 ?  
Cs4 O56 3.30(2) 2 ?  
Cs4 O326 3.40(4) 2 ?  
Cs4 O110 3.72(2) 2 ?  
Cs4 W13 4.054(3) 2 ?  
Cs6 O399 3.05(3) . ?  
Cs6 W63 4.289(7) . ?  
Cs7 Na26 3.053(19) . ?  
Cs7 O86 3.06(2) 1\_565 ?  
Cs7 O119 3.07(2) 1\_565 ?  
Cs7 O133 3.08(3) 1\_565 ?  
Cs7 O135 3.27(3) 1\_565 ?  
Gd5 W41 3.599(2) . ?  
Gd6 K3 4.119(9) 2\_546 ?  
Gd7 O237 2.34(2) 2\_546 ?  
Gd7 K3 4.429(9) 2\_546 ?  
W2 K4 3.925(9) 1\_655 ?  
W3 K4 3.865(9) 1\_655 ?  
W4 Na20 3.55(2) . ?  
W4 K4 4.032(9) 1\_655 ?  
W5 K4 3.782(10) 1\_655 ?  
W13 Cs4 4.054(3) 2 ?  
W14 Cs4 4.135(3) 2 ?  
W22 Cs5 4.171(4) 2\_655 ?  
W22 Cs4 4.430(3) 2 ?  
W23 Cs5 4.177(4) 2\_655 ?  
W26 Cs7 4.469(10) 1\_545 ?  
W28 Cs5 4.289(5) 2\_655 ?  
W29 Cs5 4.397(4) 2\_655 ?

W32 Cs7 3.983(9) 1\_545 ?  
W33 Cs7 3.875(9) 1\_545 ?  
W61 K3 3.800(9) 2\_546 ?  
W62 K3 3.916(9) 2\_546 ?  
W64 K3 3.720(10) 2\_546 ?  
W65 K3 4.035(10) 2\_546 ?  
Na25 O50 2.88(3) 1\_545 ?  
Na22 O170 2.93(3) 1\_545 ?  
Na22 O177 2.97(3) 1\_545 ?  
Na20 O290 2.84(3) 1\_565 ?  
O393 Cs5 3.13(3) 2\_655 ?

loop\_  
\_geom\_angle\_atom\_site\_label\_1  
\_geom\_angle\_atom\_site\_label\_2  
\_geom\_angle\_atom\_site\_label\_3  
\_geom\_angle  
\_geom\_angle\_site\_symmetry\_1  
\_geom\_angle\_site\_symmetry\_3  
\_geom\_angle\_publ\_flag  
W2 O2 Na10 118.7(14) . 1\_655 ?  
W4 O4 Na20 104.9(11) . . ?  
W5 O5 Cs1 141.1(13) . 1\_655 ?  
W6 O6 Na4 101.8(10) . . ?  
W1 O10 W2 151.8(13) . . ?  
W3 O11 W2 148.3(12) . . ?  
W3 O11 K4 104.4(8) . 1\_655 ?  
W2 O11 K4 102.4(8) . 1\_655 ?  
W3 O12 W1 149.8(12) . . ?  
W1 O13 W7 118.5(11) . . ?  
W1 O13 Cs5 101.5(9) . . ?  
W7 O13 Cs5 104.9(8) . . ?  
W2 O14 W6 118.0(12) . . ?  
W2 O14 Na3 131.6(12) . 1\_655 ?  
W6 O14 Na3 109.4(9) . 1\_655 ?  
W2 O15 W5 122.6(10) . . ?  
W2 O15 K4 109.7(9) . 1\_655 ?  
W5 O15 K4 100.7(8) . 1\_655 ?  
W2 O15 Na5 105.0(9) . . ?  
W5 O15 Na5 109.4(10) . . ?  
K4 O15 Na5 108.9(8) 1\_655 . ?  
W3 O16 W4 123.1(11) . . ?  
W3 O16 K4 100.7(9) . 1\_655 ?  
W4 O16 K4 101.4(9) . 1\_655 ?  
W9 O17 W3 120.1(12) . . ?  
W1 O18 W8 123.8(12) . . ?  
W1 O18 Cs5 99.7(8) . . ?  
W8 O18 Cs5 100.2(8) . . ?  
W8 O19 W7 121.5(11) . . ?  
W8 O19 Cs5 104.0(9) . . ?  
W7 O19 Cs5 105.3(8) . . ?  
W6 O20 W7 146.1(13) . . ?  
W6 O21 W5 120.3(12) . . ?  
W6 O21 Na4 99.0(9) . . ?  
W5 O21 Na4 137.6(12) . . ?  
W5 O22 W4 142.2(13) . . ?  
W5 O22 K4 104.2(9) . 1\_655 ?  
W4 O22 K4 113.3(10) . 1\_655 ?  
W9 O23 W4 122.0(10) . . ?  
W9 O23 Na20 146.5(11) . . ?  
W4 O23 Na20 90.9(9) . . ?  
W9 O24 W8 146.8(12) . . ?  
As1 O25 W3 134.0(10) . . ?  
As1 O25 W9 116.6(9) . . ?

W3 O25 W9 94.2(7) . . ?  
As1 O25 W4 112.5(10) . . ?  
W3 O25 W4 97.2(7) . . ?  
W9 O25 W4 94.2(7) . . ?  
As1 O26 W6 117.9(11) . . ?  
As1 O26 W5 118.4(11) . . ?  
W6 O26 W5 92.7(8) . . ?  
As1 O26 W2 132.8(12) . . ?  
W6 O26 W2 93.3(8) . . ?  
W5 O26 W2 92.4(8) . . ?  
As1 O27 W7 112.2(10) . . ?  
As1 O27 W1 132.9(11) . . ?  
W7 O27 W1 94.9(8) . . ?  
As1 O27 W8 122.4(11) . . ?  
W7 O27 W8 92.2(8) . . ?  
W1 O27 W8 92.7(8) . . ?  
W7 O28 Gd1 159.5(11) . . ?  
W6 O29 Gd1 158.8(12) . . ?  
W10 O32 W9 153.3(13) . . ?  
W8 O33 W10 156.5(13) . . ?  
W10 O34 Gd1 165.3(12) . . ?  
W10 O35 Gd2 176.4(12) . . ?  
Gd1 O37 Cs2 127.8(8) . . ?  
Gd1 O38 Cs5 131.0(10) . 2\_655 ?  
W11 O39 W10 150.9(13) . . ?  
W12 O40 W10 151.7(13) . . ?  
W12 O41 W11 144.7(11) . . ?  
W11 O42 W16 120.5(11) . . ?  
W11 O42 Cs7 93.1(9) . . ?  
W16 O42 Cs7 111.3(9) . . ?  
W15 O43 W16 147.3(11) . . ?  
W14 O44 W15 120.5(13) . . ?  
W13 O45 W14 143.8(11) . . ?  
W13 O45 Cs4 98.8(7) . 2 ?  
W14 O45 Cs4 101.1(7) . 2 ?  
W13 O46 W12 120.7(10) . . ?  
As2 O47 W18 136.5(10) . . ?  
As2 O47 W13 114.6(10) . . ?  
W18 O47 W13 95.4(7) . . ?  
As2 O47 W12 113.3(9) . . ?  
W18 O47 W12 94.3(8) . . ?  
W13 O47 W12 93.5(7) . . ?  
As2 O48 W16 114.8(11) . . ?  
As2 O48 W17 134.6(12) . . ?  
W16 O48 W17 93.5(8) . . ?  
As2 O48 W11 120.7(11) . . ?  
W16 O48 W11 91.6(8) . . ?  
W17 O48 W11 91.4(8) . . ?  
As2 O49 W15 115.9(10) . . ?  
As2 O49 W19 135.6(12) . . ?  
W15 O49 W19 94.2(8) . . ?  
As2 O49 W14 118.7(10) . . ?  
W15 O49 W14 90.8(8) . . ?  
W19 O49 W14 90.7(8) . . ?  
W11 O50 Na25 142.8(15) . 1\_565 ?  
W11 O50 Cs7 89.0(11) . . ?  
Na25 O50 Cs7 121.7(9) 1\_565 . ?  
W16 O52 Gd2 156.2(13) . . ?  
W15 O53 Gd2 155.6(12) . . ?  
W15 O54 Na24 122.7(11) . . ?  
W14 O55 W20 151.8(13) . . ?  
W14 O56 Cs4 107.7(11) . 2 ?  
W20 O57 W13 152.3(12) . . ?  
W13 O58 Cs4 110.9(9) . 2 ?

W12 O60 W18 121.4 (10) . . ?  
W17 O61 W11 123.4 (13) . . ?  
W17 O61 Cs7 103.2 (9) . . ?  
W11 O61 Cs7 101.6 (9) . . ?  
W17 O62 W16 120.8 (14) . . ?  
W17 O62 Cs7 91.1 (11) . . ?  
W16 O62 Cs7 107.1 (10) . . ?  
W19 O63 W15 120.2 (11) . . ?  
W19 O64 W14 121.1 (12) . . ?  
W13 O65 W18 119.4 (11) . . ?  
W18 O66 W19 145.1 (12) . . ?  
W18 O66 Cs4 103.9 (9) . . ?  
W19 O66 Cs4 102.6 (8) . . ?  
W19 O67 W17 158.7 (12) . . ?  
W18 O68 W17 149.2 (13) . . ?  
W19 O69 Cs4 105.3 (10) . . ?  
W18 O70 Cs4 102.8 (10) . . ?  
W17 O71 Cs7 81.9 (11) . . ?  
W20 O72 Gd1 159.9 (13) . . ?  
W20 O72 Cs2 91.0 (8) . . ?  
Gd1 O72 Cs2 106.0 (7) . . ?  
W20 O73 Gd2 173.4 (12) . . ?  
Gd2 O75 Na20 146.0 (12) . . ?  
Gd2 O76 Cs2 119.6 (9) . . ?  
W23 O77 Gd1 163.4 (13) . . ?  
W22 O78 W23 149.2 (12) . . ?  
W22 O78 Cs5 105.4 (8) . 2\_655 ?  
W23 O78 Cs5 105.2 (8) . 2\_655 ?  
W22 O79 Cs4 128.0 (11) . 2 ?  
W22 O80 W21 148.3 (12) . . ?  
W22 O81 W27 123.6 (12) . . ?  
W27 O82 W31 153.0 (14) . . ?  
W27 O84 W26 144.7 (11) . . ?  
W26 O85 W31 152.2 (13) . . ?  
W26 O86 Cs7 134.6 (10) . 1\_545 ?  
W26 O87 W25 122.5 (13) . . ?  
W25 O88 Gd3 160.4 (12) . . ?  
W25 O89 Na7 148.0 (12) . . ?  
W25 O90 W24 145.8 (12) . . ?  
W24 O91 Gd3 157.3 (13) . . ?  
W24 O91 Cs2 106.3 (10) . . ?  
Gd3 O91 Cs2 96.4 (7) . . ?  
W23 O93 W24 117.9 (10) . . ?  
W23 O93 Cs2 96.2 (7) . . ?  
W24 O93 Cs2 106.3 (8) . . ?  
W29 O94 W23 121.8 (12) . . ?  
W29 O94 Cs5 114.0 (8) . 2\_655 ?  
W23 O94 Cs5 102.6 (8) . 2\_655 ?  
W22 O95 W28 119.5 (10) . . ?  
W22 O95 Cs5 101.6 (7) . 2\_655 ?  
W28 O95 Cs5 106.0 (8) . 2\_655 ?  
W27 O96 W28 122.1 (10) . . ?  
W30 O97 W26 122.9 (10) . . ?  
W30 O98 W25 121.1 (11) . . ?  
W29 O99 W24 120.4 (10) . . ?  
As3 O100 W25 115.1 (9) . . ?  
As3 O100 W30 132.9 (11) . . ?  
W25 O100 W30 94.4 (7) . . ?  
As3 O100 W26 121.2 (10) . . ?  
W25 O100 W26 93.3 (8) . . ?  
W30 O100 W26 90.7 (7) . . ?  
As3 O101 W22 114.3 (9) . . ?  
As3 O101 W28 134.5 (10) . . ?  
W22 O101 W28 93.9 (8) . . ?

As3 O101 W27 116.8(10) . . ?  
W22 O101 W27 93.9(7) . . ?  
W28 O101 W27 94.6(7) . . ?  
As3 O102 W24 114.6(10) . . ?  
As3 O102 W23 121.3(10) . . ?  
W24 O102 W23 93.3(7) . . ?  
As3 O102 W29 132.3(10) . . ?  
W24 O102 W29 93.5(7) . . ?  
W23 O102 W29 92.6(8) . . ?  
W28 O103 W30 149.2(11) . . ?  
W28 O104 W29 152.2(14) . . ?  
W28 O104 Cs5 103.0(9) . 2\_655 ?  
W29 O104 Cs5 103.4(8) . 2\_655 ?  
W30 O105 W29 158.9(14) . . ?  
W21 O109 W20 114.6(10) . . ?  
W21 O109 Na1 108.5(9) . . ?  
W20 O109 Na1 110.1(8) . . ?  
W21 O109 Cs2 107.9(8) . . ?  
W20 O109 Cs2 106.9(8) . . ?  
Na1 O109 Cs2 108.8(7) . . ?  
W20 O110 W21 101.4(8) . . ?  
W20 O110 Cs4 129.4(8) . 2 ?  
W21 O110 Cs4 112.0(7) . 2 ?  
W21 O111 Gd3 168.9(10) . . ?  
W21 O111 Cs2 91.7(7) . . ?  
Gd3 O111 Cs2 94.2(6) . . ?  
Gd3 O112 Cs3 94.8(7) . . ?  
W43 O113 Gd3 148.7(13) . . ?  
W43 O113 Cs2 102.5(9) . . ?  
Gd3 O113 Cs2 108.8(8) . . ?  
W31 O114 Gd3 171.8(12) . . ?  
W41 O115 Gd3 153.3(11) . . ?  
W41 O115 Cs3 101.0(8) . . ?  
Gd3 O115 Cs3 98.2(6) . . ?  
Gd4 O116 Na1 118.9(8) . . ?  
W31 O117 Gd4 169.3(12) . . ?  
W41 O118 Gd4 171.3(12) . . ?  
W33 O119 W32 146.0(12) . . ?  
W33 O119 Cs7 100.0(8) . 1\_545 ?  
W32 O119 Cs7 102.9(8) . 1\_545 ?  
W21 O120 Gd4 157.1(11) . . ?  
Gd4 O121 Cs4 121.2(8) . 2 ?  
W36 O123 Gd4 158.7(11) . . ?  
W37 O124 Gd4 160.3(13) . . ?  
W32 O125 W31 152.3(13) . . ?  
W33 O126 W31 149.1(11) . . ?  
W34 O127 W41 154.9(11) . . ?  
W35 O128 W41 153.8(11) . . ?  
W35 O129 Cs6 130.4(10) . . ?  
W35 O129 Cs1 104.0(9) . . ?  
Cs6 O129 Cs1 103.9(6) . . ?  
W34 O130 W35 148.0(15) . . ?  
W34 O131 Cs3 120.5(11) . . ?  
W34 O132 W33 121.1(11) . . ?  
W33 O133 Cs7 104.8(10) . 1\_545 ?  
W53 O134 W52 148.7(14) . . ?  
W32 O135 Cs7 101.4(11) . 1\_545 ?  
W32 O136 W37 121.1(11) . . ?  
W36 O138 W37 143.3(13) . . ?  
W36 O139 Na3 132.9(12) . . ?  
W36 O139 Na5 109.0(11) . 1\_455 ?  
Na3 O139 Na5 88.8(8) . 1\_455 ?  
W36 O139 Na4 107.8(11) . 1\_455 ?  
Na3 O139 Na4 113.8(9) . 1\_455 ?



Na5 O139 Na4 95.2(8) 1\_455 1\_455 ?  
W35 O140 W36 118.5(10) . . ?  
W35 O140 Cs1 98.2(7) . . ?  
W36 O140 Cs1 136.8(9) . . ?  
As4 O141 W36 113.6(10) . . ?  
As4 O141 W39 135.6(11) . . ?  
W36 O141 W39 94.6(8) . . ?  
As4 O141 W35 118.2(10) . . ?  
W36 O141 W35 91.9(7) . . ?  
W39 O141 W35 93.0(7) . . ?  
As4 O142 W34 116.6(12) . . ?  
As4 O142 W40 135.7(13) . . ?  
W34 O142 W40 95.1(10) . . ?  
As4 O142 W33 113.8(12) . . ?  
W34 O142 W33 93.3(9) . . ?  
W40 O142 W33 92.9(9) . . ?  
As4 O143 W37 114.1(10) . . ?  
As4 O143 W38 130.4(11) . . ?  
W37 O143 W38 95.2(8) . . ?  
As4 O143 W32 122.5(10) . . ?  
W37 O143 W32 94.3(8) . . ?  
W38 O143 W32 92.2(7) . . ?  
W38 O144 W32 124.4(12) . . ?  
W38 O145 W37 120.2(12) . . ?  
W39 O146 W36 121.8(12) . . ?  
W39 O146 Na4 139.4(12) . 1\_455 ?  
W36 O146 Na4 98.5(9) . 1\_455 ?  
W39 O147 W35 121.2(11) . . ?  
W34 O148 W40 122.0(12) . . ?  
W33 O149 W40 120.7(11) . . ?  
W40 O150 W38 150.6(13) . . ?  
W39 O151 W38 156.0(14) . . ?  
W40 O152 W39 148.2(14) . . ?  
Gd3 O156 Cs3 100.8(6) . . ?  
W23 O157 W21 151.0(13) . . ?  
W23 O157 Cs2 109.9(10) . . ?  
W21 O157 Cs2 99.0(8) . . ?  
W42 O158 Gd2 142.0(11) . . ?  
W42 O158 Na1 107.0(10) . . ?  
Gd2 O158 Na1 110.9(8) . . ?  
W42 O159 Gd5 156.4(11) . . ?  
W42 O160 W43 142.4(13) . . ?  
W42 O160 Cs2 122.8(10) . . ?  
W43 O160 Cs2 92.7(7) . . ?  
W43 O161 Gd5 160.5(12) . . ?  
W43 O161 Cs3 99.5(8) . . ?  
Gd5 O161 Cs3 100.0(7) . . ?  
W43 O162 W44 118.4(10) . . ?  
W43 O162 Cs3 106.8(8) . . ?  
W44 O162 Cs3 97.8(8) . . ?  
W44 O163 W61 151.0(12) . . ?  
W44 O163 Cs3 107.4(9) . . ?  
W61 O163 Cs3 101.0(8) . . ?  
W44 O165 W45 145.3(14) . . ?  
W45 O166 W61 153.4(12) . . ?  
W45 O167 K3 113.6(12) . 2\_546 ?  
W45 O168 W46 118.8(11) . . ?  
W45 O168 Na21 105.6(9) . . ?  
W46 O168 Na21 122.5(10) . . ?  
W61 O169 Gd6 152.1(11) . . ?  
W61 O169 K3 103.6(8) . 2\_546 ?  
Gd6 O169 K3 99.8(7) . 2\_546 ?  
W46 O170 W47 146.7(13) . . ?  
W46 O170 Na22 108.0(10) . 1\_565 ?

W47 O170 Na22 104.8(10) . 1\_565 ?  
W47 O171 W51 154.1(11) . . ?  
W47 O173 W42 124.1(10) . . ?  
As5 O174 W50 139.3(12) . . ?  
As5 O174 W46 114.8(10) . . ?  
W50 O174 W46 94.4(8) . . ?  
As5 O174 W45 112.7(10) . . ?  
W50 O174 W45 93.4(8) . . ?  
W46 O174 W45 91.1(8) . . ?  
As5 O175 W43 115.4(11) . . ?  
As5 O175 W49 135.1(12) . . ?  
W43 O175 W49 94.4(8) . . ?  
As5 O175 W44 117.5(11) . . ?  
W43 O175 W44 92.7(8) . . ?  
W49 O175 W44 92.2(8) . . ?  
As5 O176 W42 118.2(11) . . ?  
As5 O176 W47 124.0(11) . . ?  
W42 O176 W47 95.2(8) . . ?  
As5 O176 W48 129.4(11) . . ?  
W42 O176 W48 92.7(8) . . ?  
W47 O176 W48 88.1(7) . . ?  
W48 O177 W47 126.3(11) . . ?  
W48 O177 Na22 107.4(10) . 1\_565 ?  
W47 O177 Na22 103.4(9) . 1\_565 ?  
W48 O178 W42 121.1(11) . . ?  
W49 O179 W43 119.4(11) . . ?  
W49 O179 Cs2 142.9(10) . . ?  
W43 O179 Cs2 83.0(7) . . ?  
W49 O180 W44 123.2(10) . . ?  
W50 O181 W45 121.1(12) . . ?  
W46 O182 W50 120.5(11) . . ?  
W50 O183 W49 149.1(13) . . ?  
W49 O184 W48 158.8(12) . . ?  
W50 O185 W48 148.4(13) . . ?  
Gd5 O189 Na24 123.4(10) . . ?  
W61 O190 Gd5 168.6(11) . . ?  
W41 O192 Gd5 108.1(9) . . ?  
W41 O192 Cs3 102.3(7) . . ?  
Gd5 O192 Cs3 114.2(7) . . ?  
W51 O193 Gd5 168.9(13) . . ?  
W41 O194 Gd5 112.1(10) . . ?  
W41 O194 Na1 125.3(10) . . ?  
Gd5 O194 Na1 118.1(9) . . ?  
W51 O195 Gd6 169.0(11) . . ?  
W46 O196 W51 156.4(13) . . ?  
W51 O197 W53 152.1(12) . . ?  
W52 O198 W51 153.0(12) . . ?  
W52 O199 Na16 139.2(14) . 1\_565 ?  
W52 O200 W57 120.0(11) . . ?  
W57 O201 Gd6 157.1(14) . . ?  
W57 O203 W56 149.3(14) . . ?  
W56 O204 Gd6 158.8(13) . . ?  
W56 O206 W55 120.8(14) . . ?  
W55 O207 Cs1 101.9(12) . . ?  
W55 O208 Cs6 130.4(12) . . ?  
W54 O209 W55 141.6(13) . . ?  
W54 O209 Cs1 89.5(8) . . ?  
W55 O209 Cs1 93.4(8) . . ?  
W54 O210 Na10 140.8(15) . . ?  
W54 O210 K4 102.9(11) . . ?  
Na10 O210 K4 102.4(10) . . ?  
W54 O210 Cs1 103.3(12) . . ?  
Na10 O210 Cs1 96.8(9) . . ?  
K4 O210 Cs1 107.9(8) . . ?

W53 O212 W54 121.9(12) . . ?  
As6 O214 W54 117.0(11) . . ?  
As6 O214 W53 114.9(11) . . ?  
W54 O214 W53 93.6(9) . . ?  
As6 O214 W59 134.1(12) . . ?  
W54 O214 W59 95.2(9) . . ?  
W53 O214 W59 93.2(9) . . ?  
As6 O215 W57 117.8(12) . . ?  
As6 O215 W58 131.9(12) . . ?  
W57 O215 W58 94.0(8) . . ?  
As6 O215 W52 120.6(12) . . ?  
W57 O215 W52 92.4(8) . . ?  
W58 O215 W52 90.6(8) . . ?  
As6 O216 W56 116.2(10) . . ?  
As6 O216 W55 119.2(10) . . ?  
W56 O216 W55 93.1(8) . . ?  
As6 O216 W60 133.5(11) . . ?  
W56 O216 W60 92.5(8) . . ?  
W55 O216 W60 92.9(7) . . ?  
W60 O217 W55 125.7(12) . . ?  
W59 O218 W54 119.1(12) . . ?  
W59 O218 K4 133.3(11) . . ?  
W54 O218 K4 106.9(9) . . ?  
W53 O219 W59 118.6(12) . . ?  
W58 O220 W52 122.5(13) . . ?  
W58 O221 W57 122.6(13) . . ?  
W60 O222 W56 120.2(17) . . ?  
W60 O223 W58 156.8(15) . . ?  
W59 O224 W58 149.0(15) . . ?  
W59 O225 W60 152.6(14) . . ?  
W59 O226 Na9 161.5(17) . . ?  
W60 O228 Na6 168.9(15) . 1\_465 ?  
Gd6 O229 Cs6 133.8(9) . . ?  
Gd6 O230 K3 87.0(8) . 2\_546 ?  
W64 O231 Gd6 148.8(12) . . ?  
Gd6 O232 K3 95.8(8) . 2\_546 ?  
W62 O233 W63 155.3(12) . . ?  
W64 O234 W62 152.5(12) . . ?  
W64 O234 K3 105.2(9) . 2\_546 ?  
W62 O234 K3 102.2(8) . 2\_546 ?  
W64 O235 W65 121.1(12) . . ?  
W64 O235 K3 94.6(9) . 2\_546 ?  
W65 O235 K3 106.8(10) . 2\_546 ?  
W65 O236 Gd7 159.5(12) . . ?  
W65 O236 K3 99.5(8) . 2\_546 ?  
Gd7 O236 K3 100.8(7) . 2\_546 ?  
W65 O237 Gd7 156.3(12) . 2\_546 ?  
W65 O238 W66 142.9(14) . . ?  
W66 O239 Gd7 159.8(12) . . ?  
W66 O240 K3 143.3(13) . . ?  
W67 O241 W66 124.9(13) . . ?  
W67 O242 W72 154.9(15) . . ?  
W67 O244 W68 145.4(17) . . ?  
W72 O245 W68 152.5(15) . . ?  
W68 O247 W63 120.9(13) . . ?  
W63 O248 Cs6 111.4(10) . . ?  
W71 O249 W64 119.7(12) . . ?  
W71 O250 W65 119.1(12) . . ?  
W70 O251 W66 120.8(13) . . ?  
W70 O252 W67 125.8(17) . . ?  
W69 O253 W68 120.8(14) . . ?  
W63 O254 W69 123.0(13) . . ?  
W69 O255 W71 148.5(14) . . ?  
W71 O256 W70 157.3(15) . . ?

W69 O257 W70 149.4 (17) . . ?  
W72 O261 Gd7 173.2 (14) . . ?  
W62 O262 Gd7 172.4 (13) . . ?  
Gd7 O263 K3 113.1 (10) . 2\_546 ?  
W82 O265 Gd7 146.0 (12) . . ?  
W77 O268 W82 151.6 (16) . . ?  
W77 O270 W76 146.6 (15) . . ?  
W76 O271 W82 148.1 (17) . . ?  
W82 O272 Gd8 160.3 (16) . . ?  
W76 O274 W75 120.8 (13) . . ?  
W75 O275 Gd8 160.8 (15) . . ?  
W75 O276 Na7 142.1 (15) . . ?  
W75 O277 W74 143.6 (12) . . ?  
W74 O278 Gd8 156.7 (13) . . ?  
W73 O280 W74 120.6 (11) . . ?  
W73 O281 W72 153.1 (14) . . ?  
W73 O282 Na16 153.1 (17) . . ?  
W73 O283 W78 148.2 (17) . . ?  
W78 O284 W72 152.8 (15) . . ?  
W78 O286 W77 119.2 (15) . . ?  
As8 O287 W79 137.0 (12) . . ?  
As8 O287 W78 116.4 (12) . . ?  
W79 O287 W78 94.1 (9) . . ?  
As8 O287 W77 112.6 (12) . . ?  
W79 O287 W77 94.2 (9) . . ?  
W78 O287 W77 92.6 (8) . . ?  
As8 O288 W75 115.0 (11) . . ?  
As8 O288 W81 134.4 (12) . . ?  
W75 O288 W81 94.3 (8) . . ?  
As8 O288 W76 118.7 (10) . . ?  
W75 O288 W76 92.6 (8) . . ?  
W81 O288 W76 92.3 (8) . . ?  
As8 O289 W74 117.1 (11) . . ?  
As8 O289 W80 133.2 (11) . . ?  
W74 O289 W80 93.1 (7) . . ?  
As8 O289 W73 122.0 (10) . . ?  
W74 O289 W73 91.5 (8) . . ?  
W80 O289 W73 89.4 (7) . . ?  
W80 O290 W74 122.1 (12) . . ?  
W80 O290 Na20 104.7 (11) . 1\_545 ?  
W74 O290 Na20 132.7 (12) . 1\_545 ?  
W80 O291 W73 121.1 (13) . . ?  
W80 O291 Na22 125.3 (12) . . ?  
W73 O291 Na22 112.9 (11) . . ?  
W78 O292 W79 119.5 (14) . . ?  
W79 O293 W77 121.1 (14) . . ?  
W81 O294 W75 118.5 (12) . . ?  
W81 O295 W76 121.3 (12) . . ?  
W81 O296 W80 155.5 (13) . . ?  
W79 O297 W81 149.0 (14) . . ?  
W79 O298 W80 150.4 (16) . . ?  
W81 O300 Na9 138.7 (15) . 1\_645 ?  
W72 O302 Gd8 171.4 (13) . . ?  
Gd8 O304 Cs3 94.7 (9) . . ?  
Gd8 O305 Cs3 93.0 (8) . . ?  
W62 O306 Gd8 149.1 (13) . . ?  
W62 O306 Cs3 115.2 (10) . . ?  
Gd8 O306 Cs3 93.4 (6) . . ?  
W61 O307 W62 109.1 (9) . . ?  
W61 O307 Cs3 101.1 (8) . . ?  
W62 O307 Cs3 104.5 (7) . . ?  
W62 O308 W61 105.0 (10) . . ?  
W62 O308 K3 108.5 (10) . 2\_546 ?  
W61 O308 K3 99.6 (8) . 2\_546 ?

W63 O309 W64 146.3(13) . . ?  
W63 O309 Cs6 97.2(8) . . ?  
W64 O309 Cs6 110.9(9) . . ?  
Cs4 O324 Cs4 180.00(13) . 2 ?  
Na9 O348 K4 109(2) 1\_645 1\_645 ?  
As7 O361 W65 115.5(11) . . ?  
As7 O361 W64 118.8(11) . . ?  
W65 O361 W64 93.5(8) . . ?  
As7 O361 W71 133.4(12) . . ?  
W65 O361 W71 94.3(8) . . ?  
W64 O361 W71 92.2(8) . . ?  
As7 O362 W66 114.8(13) . . ?  
As7 O362 W70 137.0(13) . . ?  
W66 O362 W70 93.6(9) . . ?  
As7 O362 W67 120.7(12) . . ?  
W66 O362 W67 89.7(9) . . ?  
W70 O362 W67 89.1(9) . . ?  
As7 O363 W69 137.3(13) . . ?  
As7 O363 W68 116.1(12) . . ?  
W69 O363 W68 92.7(9) . . ?  
As7 O363 W63 115.9(12) . . ?  
W69 O363 W63 92.5(8) . . ?  
W68 O363 W63 91.8(8) . . ?  
W46 O373 Na16 104.8(13) . 1\_565 ?  
Na8 O384 Na7 122(9) . . ?  
O116 Na1 O194 76.1(8) . . ?  
O116 Na1 O109 105.9(8) . . ?  
O194 Na1 O109 117.6(8) . . ?  
O116 Na1 O158 163.3(8) . . ?  
O194 Na1 O158 109.3(8) . . ?  
O109 Na1 O158 85.9(7) . . ?  
O116 Na1 Na24 103.5(6) . . ?  
O194 Na1 Na24 86.6(6) . . ?  
O109 Na1 Na24 145.6(7) . . ?  
O158 Na1 Na24 62.0(5) . . ?  
O116 Na1 Cs2 135.7(6) . . ?  
O194 Na1 Cs2 99.3(6) . . ?  
O109 Na1 Cs2 37.0(4) . . ?  
O158 Na1 Cs2 60.1(5) . . ?  
Na24 Na1 Cs2 120.4(4) . . ?  
Na11 Na3 O139 75.2(7) . . ?  
Na11 Na3 O14 118.7(8) . 1\_455 ?  
O139 Na3 O14 91.2(8) . 1\_455 ?  
Na11 Na3 O320 105.6(8) . . ?  
O139 Na3 O320 153.3(9) . . ?  
O14 Na3 O320 110.5(9) 1\_455 . ?  
Na11 Na3 O321 69.4(7) . . ?  
O139 Na3 O321 127.1(9) . . ?  
O14 Na3 O321 73.8(7) 1\_455 . ?  
O320 Na3 O321 75.6(9) . . ?  
Na11 Na3 Na5 120.6(7) . 1\_455 ?  
O139 Na3 Na5 46.7(6) . 1\_455 ?  
O14 Na3 Na5 61.0(6) 1\_455 1\_455 ?  
O320 Na3 Na5 131.3(8) . 1\_455 ?  
O321 Na3 Na5 132.8(7) . 1\_455 ?  
O368 Na4 O366 76.9(13) . . ?  
O368 Na4 O139 128.8(13) . 1\_655 ?  
O366 Na4 O139 151.9(10) . 1\_655 ?  
O368 Na4 O21 143.8(13) . . ?  
O366 Na4 O21 67.1(9) . . ?  
O139 Na4 O21 85.9(8) 1\_655 . ?  
O368 Na4 O146 75.0(12) . 1\_655 ?  
O366 Na4 O146 136.9(10) . 1\_655 ?  
O139 Na4 O146 57.0(7) 1\_655 1\_655 ?

O21 Na4 O146 130.3(9) . 1\_655 ?  
O368 Na4 O6 133.5(13) . . ?  
O366 Na4 O6 93.9(9) . . ?  
O139 Na4 O6 76.2(8) 1\_655 . ?  
O21 Na4 O6 56.1(7) . . ?  
O146 Na4 O6 129.1(9) 1\_655 . ?  
O368 Na4 Cs1 110.3(11) . 1\_655 ?  
O366 Na4 Cs1 93.8(7) . 1\_655 ?  
O139 Na4 Cs1 68.3(5) 1\_655 1\_655 ?  
O21 Na4 Cs1 69.3(5) . 1\_655 ?  
O146 Na4 Cs1 66.9(5) 1\_655 1\_655 ?  
O6 Na4 Cs1 115.8(6) . 1\_655 ?  
Na10 Na5 O15 91.3(10) 1\_655 . ?  
Na10 Na5 O139 120.4(11) 1\_655 1\_655 ?  
O15 Na5 O139 118.5(9) . 1\_655 ?  
Na10 Na5 Cs1 117.1(10) 1\_655 1\_655 ?  
O15 Na5 Cs1 100.2(8) . 1\_655 ?  
O139 Na5 Cs1 107.2(8) 1\_655 1\_655 ?  
Na10 Na5 Na3 87.9(9) 1\_655 1\_655 ?  
O15 Na5 Na3 92.7(7) . 1\_655 ?  
O139 Na5 Na3 44.5(6) 1\_655 1\_655 ?  
Cs1 Na5 Na3 151.2(7) 1\_655 1\_655 ?  
O339 Na6 O228 76.3(14) . 1\_645 ?  
O339 Na6 Na23 102.2(14) . . ?  
O228 Na6 Na23 51.1(7) 1\_645 . ?  
O339 Na6 Na22 84.3(13) . . ?  
O228 Na6 Na22 159.8(8) 1\_645 . ?  
Na23 Na6 Na22 141.4(6) . . ?  
O384 Na7 O350 171.8(15) . . ?  
O384 Na7 O349 89.3(12) . . ?  
O350 Na7 O349 96.1(14) . . ?  
O384 Na7 O89 88.6(10) . . ?  
O350 Na7 O89 87.3(13) . . ?  
O349 Na7 O89 168.5(12) . . ?  
O384 Na7 O351 89.2(11) . . ?  
O350 Na7 O351 97.1(14) . . ?  
O349 Na7 O351 88.4(12) . . ?  
O89 Na7 O351 80.3(10) . . ?  
O384 Na7 O276 89.6(10) . . ?  
O350 Na7 O276 83.5(13) . . ?  
O349 Na7 O276 98.9(11) . . ?  
O89 Na7 O276 92.4(9) . . ?  
O351 Na7 O276 172.6(12) . . ?  
O384 Na7 Na8 10.7(18) . . ?  
O350 Na7 Na8 161.5(19) . . ?  
O349 Na7 Na8 99.2(18) . . ?  
O89 Na7 Na8 79.8(17) . . ?  
O351 Na7 Na8 93.7(17) . . ?  
O276 Na7 Na8 83.9(17) . . ?  
O384 Na8 Na7 47(8) . . ?  
O384 Na8 O398 150(10) . . ?  
Na7 Na8 O398 117(3) . . ?  
O348 Na9 O226 88.1(17) 1\_465 . ?  
O348 Na9 O347 96.8(18) 1\_465 1\_465 ?  
O226 Na9 O347 172.8(13) . 1\_465 ?  
O348 Na9 O300 170.1(19) 1\_465 1\_465 ?  
O226 Na9 O300 87.2(11) . 1\_465 ?  
O347 Na9 O300 88.7(12) 1\_465 1\_465 ?  
O348 Na9 O375 90.9(18) 1\_465 1\_465 ?  
O226 Na9 O375 96.7(13) . 1\_465 ?  
O347 Na9 O375 88.6(13) 1\_465 1\_465 ?  
O300 Na9 O375 81.1(12) 1\_465 1\_465 ?  
O348 Na9 O345 98.6(19) 1\_465 1\_465 ?  
O226 Na9 O345 86.5(13) . 1\_465 ?

O347 Na9 O345 87.5(14) 1\_465 1\_465 ?  
O300 Na9 O345 89.8(12) 1\_465 1\_465 ?  
O375 Na9 O345 170.2(14) 1\_465 1\_465 ?  
O348 Na9 K4 42.8(16) 1\_465 . ?  
O226 Na9 K4 65.6(8) . . ?  
O347 Na9 K4 121.6(10) 1\_465 . ?  
O300 Na9 K4 127.3(9) 1\_465 . ?  
O375 Na9 K4 60.2(9) 1\_465 . ?  
O345 Na9 K4 129.3(10) 1\_465 . ?  
Na5 Na10 O376 152.7(14) 1\_455 . ?  
Na5 Na10 O346 103.9(12) 1\_455 . ?  
O376 Na10 O346 100.2(14) . . ?  
Na5 Na10 O377 84.1(11) 1\_455 . ?  
O376 Na10 O377 110.2(13) . . ?  
O346 Na10 O377 86.4(11) . . ?  
Na5 Na10 O210 78.7(10) 1\_455 . ?  
O376 Na10 O210 76.6(12) . . ?  
O346 Na10 O210 176.1(13) . . ?  
O377 Na10 O210 96.8(11) . . ?  
Na5 Na10 O2 93.2(10) 1\_455 1\_455 ?  
O376 Na10 O2 83.1(12) . 1\_455 ?  
O346 Na10 O2 70.0(10) . 1\_455 ?  
O377 Na10 O2 155.0(11) . 1\_455 ?  
O210 Na10 O2 107.1(10) . 1\_455 ?  
Na5 Na10 Cs1 37.5(7) 1\_455 . ?  
O376 Na10 Cs1 122.5(11) . . ?  
O346 Na10 Cs1 136.7(10) . . ?  
O377 Na10 Cs1 73.7(8) . . ?  
O210 Na10 Cs1 46.8(7) . . ?  
O2 Na10 Cs1 117.9(8) 1\_455 . ?  
Na5 Na10 K4 80.1(8) 1\_455 . ?  
O376 Na10 K4 74.0(10) . . ?  
O346 Na10 K4 134.2(10) . . ?  
O377 Na10 K4 138.9(9) . . ?  
O210 Na10 K4 43.0(6) . . ?  
O2 Na10 K4 64.2(6) 1\_455 . ?  
Cs1 Na10 K4 70.7(3) . . ?  
Na3 Na11 O394 102.8(10) . . ?  
O282 Na16 O335 65.2(11) . . ?  
O282 Na16 O199 127.8(13) . 1\_545 ?  
O335 Na16 O199 63.7(10) . 1\_545 ?  
O282 Na16 O373 157.2(14) . 1\_545 ?  
O335 Na16 O373 136.5(13) . 1\_545 ?  
O199 Na16 O373 74.9(10) 1\_545 1\_545 ?  
O282 Na16 Na22 71.2(10) . . ?  
O335 Na16 Na22 136.2(13) . . ?  
O199 Na16 Na22 156.9(12) 1\_545 . ?  
O373 Na16 Na22 87.1(10) 1\_545 . ?  
O240 K3 O308 132.9(8) . 2\_546 ?  
O240 K3 O234 160.4(8) . 2\_546 ?  
O308 K3 O234 58.5(7) 2\_546 2\_546 ?  
O240 K3 O263 74.9(7) . 2\_546 ?  
O308 K3 O263 76.3(7) 2\_546 2\_546 ?  
O234 K3 O263 96.0(7) 2\_546 2\_546 ?  
O240 K3 O169 137.3(7) . 2\_546 ?  
O308 K3 O169 58.6(6) 2\_546 2\_546 ?  
O234 K3 O169 60.8(6) 2\_546 2\_546 ?  
O263 K3 O169 135.0(7) 2\_546 2\_546 ?  
O240 K3 O235 110.9(7) . 2\_546 ?  
O308 K3 O235 113.0(7) 2\_546 2\_546 ?  
O234 K3 O235 54.6(7) 2\_546 2\_546 ?  
O263 K3 O235 107.5(8) 2\_546 2\_546 ?  
O169 K3 O235 90.3(7) 2\_546 2\_546 ?  
O240 K3 O232 85.6(7) . 2\_546 ?

O308 K3 O232 99.9(7) 2\_546 2\_546 ?  
O234 K3 O232 109.7(7) 2\_546 2\_546 ?  
O263 K3 O232 147.3(8) 2\_546 2\_546 ?  
O169 K3 O232 52.7(6) 2\_546 2\_546 ?  
O235 K3 O232 103.8(7) 2\_546 2\_546 ?  
O240 K3 O167 65.5(7) . 2\_546 ?  
O308 K3 O167 70.2(7) 2\_546 2\_546 ?  
O234 K3 O167 128.7(7) 2\_546 2\_546 ?  
O263 K3 O167 71.3(8) 2\_546 2\_546 ?  
O169 K3 O167 93.0(7) 2\_546 2\_546 ?  
O235 K3 O167 176.3(7) 2\_546 2\_546 ?  
O232 K3 O167 76.9(7) 2\_546 2\_546 ?  
O240 K3 O236 97.1(7) . 2\_546 ?  
O308 K3 O236 97.5(7) 2\_546 2\_546 ?  
O234 K3 O236 63.7(6) 2\_546 2\_546 ?  
O263 K3 O236 57.0(7) 2\_546 2\_546 ?  
O169 K3 O236 124.0(6) 2\_546 2\_546 ?  
O235 K3 O236 50.5(6) 2\_546 2\_546 ?  
O232 K3 O236 153.4(7) 2\_546 2\_546 ?  
O167 K3 O236 128.2(7) 2\_546 2\_546 ?  
O240 K3 O230 92.4(7) . 2\_546 ?  
O308 K3 O230 128.0(7) 2\_546 2\_546 ?  
O234 K3 O230 87.7(7) 2\_546 2\_546 ?  
O263 K3 O230 151.5(8) 2\_546 2\_546 ?  
O169 K3 O230 70.9(7) 2\_546 2\_546 ?  
O235 K3 O230 52.9(7) 2\_546 2\_546 ?  
O232 K3 O230 52.6(7) 2\_546 2\_546 ?  
O167 K3 O230 126.9(8) 2\_546 2\_546 ?  
O236 K3 O230 100.8(7) 2\_546 2\_546 ?  
O240 K3 W64 141.6(6) . 2\_546 ?  
O308 K3 W64 84.5(5) 2\_546 2\_546 ?  
O234 K3 W64 27.8(5) 2\_546 2\_546 ?  
O263 K3 W64 114.0(6) 2\_546 2\_546 ?  
O169 K3 W64 63.8(4) 2\_546 2\_546 ?  
O235 K3 W64 31.1(4) 2\_546 2\_546 ?  
O232 K3 W64 97.7(5) 2\_546 2\_546 ?  
O167 K3 W64 152.6(5) 2\_546 2\_546 ?  
O236 K3 W64 64.1(4) 2\_546 2\_546 ?  
O230 K3 W64 61.6(5) 2\_546 2\_546 ?  
O240 K3 W61 136.4(6) . 2\_546 ?  
O308 K3 W61 33.7(5) 2\_546 2\_546 ?  
O234 K3 W61 62.8(5) 2\_546 2\_546 ?  
O263 K3 W61 109.1(6) 2\_546 2\_546 ?  
O169 K3 W61 27.0(4) 2\_546 2\_546 ?  
O235 K3 W61 108.9(5) 2\_546 2\_546 ?  
O232 K3 W61 68.2(5) 2\_546 2\_546 ?  
O167 K3 W61 74.7(5) 2\_546 2\_546 ?  
O236 K3 W61 122.0(4) 2\_546 2\_546 ?  
O230 K3 W61 97.7(5) 2\_546 2\_546 ?  
W64 K3 W61 78.30(18) 2\_546 2\_546 ?  
O218 K4 O358 68.6(9) . 1\_455 ?  
O218 K4 O22 148.1(8) . 1\_455 ?  
O358 K4 O22 80.4(9) 1\_455 1\_455 ?  
O218 K4 O15 130.5(7) . 1\_455 ?  
O358 K4 O15 112.7(9) 1\_455 1\_455 ?  
O22 K4 O15 55.3(6) 1\_455 1\_455 ?  
O218 K4 O11 145.6(8) . 1\_455 ?  
O358 K4 O11 145.5(9) 1\_455 1\_455 ?  
O22 K4 O11 66.0(7) 1\_455 1\_455 ?  
O15 K4 O11 54.2(6) 1\_455 1\_455 ?  
O218 K4 O16 138.9(7) . 1\_455 ?  
O358 K4 O16 100.5(9) 1\_455 1\_455 ?  
O22 K4 O16 52.8(7) 1\_455 1\_455 ?  
O15 K4 O16 90.5(6) 1\_455 1\_455 ?



O11 K4 O16 53.0(6) 1\_455 1\_455 ?  
O218 K4 O210 54.7(7) . . ?  
O358 K4 O210 88.3(9) 1\_455 . ?  
O22 K4 O210 119.1(7) 1\_455 . ?  
O15 K4 O210 75.9(7) 1\_455 . ?  
O11 K4 O210 114.3(7) 1\_455 . ?  
O16 K4 O210 165.9(7) 1\_455 . ?  
O218 K4 O348 78.5(12) . 1\_465 ?  
O358 K4 O348 118.0(13) 1\_455 1\_465 ?  
O22 K4 O348 124.8(12) 1\_455 1\_465 ?  
O15 K4 O348 128.5(12) 1\_455 1\_465 ?  
O11 K4 O348 78.1(11) 1\_455 1\_465 ?  
O16 K4 O348 72.3(11) 1\_455 1\_465 ?  
O210 K4 O348 113.3(12) . 1\_465 ?  
O218 K4 W5 136.1(6) . 1\_455 ?  
O358 K4 W5 86.0(8) 1\_455 1\_455 ?  
O22 K4 W5 29.2(5) 1\_455 1\_455 ?  
O15 K4 W5 31.5(4) 1\_455 1\_455 ?  
O11 K4 W5 68.8(4) 1\_455 1\_455 ?  
O16 K4 W5 78.9(5) 1\_455 1\_455 ?  
O210 K4 W5 90.9(5) . 1\_455 ?  
O348 K4 W5 145.1(11) 1\_465 1\_455 ?  
O218 K4 W3 143.2(6) . 1\_455 ?  
O358 K4 W3 128.3(8) 1\_455 1\_455 ?  
O22 K4 W3 64.2(5) 1\_455 1\_455 ?  
O15 K4 W3 77.5(5) 1\_455 1\_455 ?  
O11 K4 W3 27.7(4) 1\_455 1\_455 ?  
O16 K4 W3 28.0(4) 1\_455 1\_455 ?  
O210 K4 W3 141.1(6) . 1\_455 ?  
O348 K4 W3 64.7(10) 1\_465 1\_455 ?  
W5 K4 W3 80.66(17) 1\_455 1\_455 ?  
O218 K4 W54 30.4(5) . . ?  
O358 K4 W54 74.0(8) 1\_455 . ?  
O22 K4 W54 133.4(6) 1\_455 . ?  
O15 K4 W54 100.3(5) 1\_455 . ?  
O11 K4 W54 135.7(5) 1\_455 . ?  
O16 K4 W54 169.1(5) 1\_455 . ?  
O210 K4 W54 25.0(5) . . ?  
O348 K4 W54 101.6(10) 1\_465 . ?  
W5 K4 W54 109.6(2) 1\_455 . ?  
W3 K4 W54 156.9(3) 1\_455 . ?  
O218 K4 W2 136.3(6) . 1\_455 ?  
O358 K4 W2 138.5(8) 1\_455 1\_455 ?  
O22 K4 W2 66.0(5) 1\_455 1\_455 ?  
O15 K4 W2 27.2(4) 1\_455 1\_455 ?  
O11 K4 W2 30.1(4) 1\_455 1\_455 ?  
O16 K4 W2 78.5(5) 1\_455 1\_455 ?  
O210 K4 W2 87.5(5) . 1\_455 ?  
O348 K4 W2 101.4(11) 1\_465 1\_455 ?  
W5 K4 W2 52.88(12) 1\_455 1\_455 ?  
W3 K4 W2 57.13(13) 1\_455 1\_455 ?  
W54 K4 W2 111.9(2) . 1\_455 ?  
O26 As1 O27 100.8(10) . . ?  
O26 As1 O25 98.5(9) . . ?  
O27 As1 O25 94.9(9) . . ?  
O49 As2 O48 98.4(10) . . ?  
O49 As2 O47 95.3(9) . . ?  
O48 As2 O47 95.3(10) . . ?  
O101 As3 O100 95.6(9) . . ?  
O101 As3 O102 97.3(9) . . ?  
O100 As3 O102 101.0(9) . . ?  
O142 As4 O141 94.3(11) . . ?  
O142 As4 O143 97.1(11) . . ?  
O141 As4 O143 100.4(9) . . ?

O176 As5 O174 95.7(10) . . ?  
O176 As5 O175 100.1(10) . . ?  
O174 As5 O175 95.2(10) . . ?  
O216 As6 O215 100.3(10) . . ?  
O216 As6 O214 96.3(10) . . ?  
O215 As6 O214 99.0(11) . . ?  
O363 As7 O362 94.0(12) . . ?  
O363 As7 O361 96.2(10) . . ?  
O362 As7 O361 98.0(11) . . ?  
O289 As8 O287 95.2(11) . . ?  
O289 As8 O288 99.5(10) . . ?  
O287 As8 O288 96.5(11) . . ?  
Na5 Cs1 O5 72.4(6) 1\_455 1\_455 ?  
Na5 Cs1 O210 58.3(6) 1\_455 . ?  
O5 Cs1 O210 81.9(7) 1\_455 . ?  
Na5 Cs1 O129 101.6(6) 1\_455 . ?  
O5 Cs1 O129 169.5(6) 1\_455 . ?  
O210 Cs1 O129 102.5(6) . . ?  
Na5 Cs1 O140 59.2(5) 1\_455 . ?  
O5 Cs1 O140 118.6(6) 1\_455 . ?  
O210 Cs1 O140 100.4(6) . . ?  
O129 Cs1 O140 51.5(5) . . ?  
Na5 Cs1 O207 152.2(6) 1\_455 . ?  
O5 Cs1 O207 91.5(7) 1\_455 . ?  
O210 Cs1 O207 97.9(7) . . ?  
O129 Cs1 O207 97.3(6) . . ?  
O140 Cs1 O207 146.6(6) . . ?  
Na5 Cs1 O319 133.7(9) 1\_455 . ?  
O5 Cs1 O319 108.3(9) 1\_455 . ?  
O210 Cs1 O319 165.7(9) . . ?  
O129 Cs1 O319 69.4(9) . . ?  
O140 Cs1 O319 83.8(8) . . ?  
O207 Cs1 O319 72.3(9) . . ?  
Na5 Cs1 O209 107.2(6) 1\_455 . ?  
O5 Cs1 O209 88.7(6) 1\_455 . ?  
O210 Cs1 O209 49.6(6) . . ?  
O129 Cs1 O209 101.4(5) . . ?  
O140 Cs1 O209 138.2(5) . . ?  
O207 Cs1 O209 48.6(6) . . ?  
O319 Cs1 O209 119.1(9) . . ?  
Na5 Cs1 W54 82.0(4) 1\_455 . ?  
O5 Cs1 W54 94.9(5) 1\_455 . ?  
O210 Cs1 W54 24.5(5) . . ?  
O129 Cs1 W54 92.6(4) . . ?  
O140 Cs1 W54 111.9(4) . . ?  
O207 Cs1 W54 76.9(5) . . ?  
O319 Cs1 W54 141.5(8) . . ?  
O209 Cs1 W54 29.1(4) . . ?  
Na5 Cs1 W35 85.2(4) 1\_455 . ?  
O5 Cs1 W35 145.1(5) 1\_455 . ?  
O210 Cs1 W35 109.0(5) . . ?  
O129 Cs1 W35 24.5(4) . . ?  
O140 Cs1 W35 28.4(4) . . ?  
O207 Cs1 W35 118.5(5) . . ?  
O319 Cs1 W35 68.7(8) . . ?  
O209 Cs1 W35 124.1(4) . . ?  
W54 Cs1 W35 108.43(9) . . ?  
Na5 Cs1 W55 135.3(4) 1\_455 . ?  
O5 Cs1 W55 100.8(5) 1\_455 . ?  
O210 Cs1 W55 77.1(5) . . ?  
O129 Cs1 W55 89.5(4) . . ?  
O140 Cs1 W55 140.0(4) . . ?  
O207 Cs1 W55 24.4(5) . . ?  
O319 Cs1 W55 90.8(8) . . ?

O209 Cs1 W55 28.4(4) . . ?  
W54 Cs1 W55 54.09(6) . . ?  
W35 Cs1 W55 113.88(9) . . ?  
Na5 Cs1 Na10 25.4(5) 1\_455 . ?  
O5 Cs1 Na10 84.9(6) 1\_455 . ?  
O210 Cs1 Na10 36.5(5) . . ?  
O129 Cs1 Na10 92.9(5) . . ?  
O140 Cs1 Na10 67.5(4) . . ?  
O207 Cs1 Na10 134.3(5) . . ?  
O319 Cs1 Na10 151.2(8) . . ?  
O209 Cs1 Na10 85.8(5) . . ?  
W54 Cs1 Na10 58.2(2) . . ?  
W35 Cs1 Na10 85.8(3) . . ?  
W55 Cs1 Na10 112.3(3) . . ?  
O393 Cs5 O78 74.8(8) 2\_655 2\_655 ?  
O393 Cs5 O94 111.1(7) 2\_655 2\_655 ?  
O78 Cs5 O94 47.6(5) 2\_655 2\_655 ?  
O393 Cs5 O38 64.8(8) 2\_655 2\_655 ?  
O78 Cs5 O38 85.5(6) 2\_655 2\_655 ?  
O94 Cs5 O38 74.9(6) 2\_655 2\_655 ?  
O393 Cs5 O95 89.1(8) 2\_655 2\_655 ?  
O78 Cs5 O95 48.5(5) 2\_655 2\_655 ?  
O94 Cs5 O95 79.5(5) 2\_655 2\_655 ?  
O38 Cs5 O95 132.7(6) 2\_655 2\_655 ?  
O393 Cs5 O13 51.6(8) 2\_655 . ?  
O78 Cs5 O13 124.4(5) 2\_655 . ?  
O94 Cs5 O13 158.0(5) 2\_655 . ?  
O38 Cs5 O13 84.4(6) 2\_655 . ?  
O95 Cs5 O13 110.4(5) 2\_655 . ?  
O393 Cs5 O19 87.0(8) 2\_655 . ?  
O78 Cs5 O19 154.8(5) 2\_655 . ?  
O94 Cs5 O19 129.1(5) 2\_655 . ?  
O38 Cs5 O19 70.9(6) 2\_655 . ?  
O95 Cs5 O19 150.3(5) 2\_655 . ?  
O13 Cs5 O19 46.6(5) . . ?  
O393 Cs5 O18 96.2(7) 2\_655 . ?  
O78 Cs5 O18 151.5(5) 2\_655 . ?  
O94 Cs5 O18 152.4(5) 2\_655 . ?  
O38 Cs5 O18 115.7(6) 2\_655 . ?  
O95 Cs5 O18 105.4(5) 2\_655 . ?  
O13 Cs5 O18 46.0(5) . . ?  
O19 Cs5 O18 46.1(5) . . ?  
O393 Cs5 O104 127.5(8) 2\_655 2\_655 ?  
O78 Cs5 O104 55.3(5) 2\_655 2\_655 ?  
O94 Cs5 O104 45.6(5) 2\_655 2\_655 ?  
O38 Cs5 O104 120.5(6) 2\_655 2\_655 ?  
O95 Cs5 O104 46.8(5) 2\_655 2\_655 ?  
O13 Cs5 O104 153.5(5) . 2\_655 ?  
O19 Cs5 O104 145.6(5) . 2\_655 ?  
O18 Cs5 O104 119.0(5) . 2\_655 ?  
O393 Cs5 W22 70.5(7) 2\_655 2\_655 ?  
O78 Cs5 W22 26.1(4) 2\_655 2\_655 ?  
O94 Cs5 W22 70.1(4) 2\_655 2\_655 ?  
O38 Cs5 W22 105.8(5) 2\_655 2\_655 ?  
O95 Cs5 W22 27.0(3) 2\_655 2\_655 ?  
O13 Cs5 W22 109.6(4) . 2\_655 ?  
O19 Cs5 W22 155.6(4) . 2\_655 ?  
O18 Cs5 W22 125.4(4) . 2\_655 ?  
O104 Cs5 W22 57.6(4) 2\_655 2\_655 ?  
O393 Cs5 W1 71.7(6) 2\_655 . ?  
O78 Cs5 W1 131.7(4) 2\_655 . ?  
O94 Cs5 W1 175.3(4) 2\_655 . ?  
O38 Cs5 W1 109.8(5) 2\_655 . ?  
O95 Cs5 W1 96.9(4) 2\_655 . ?

O13 Cs5 W1 26.5(4) . . ?  
O19 Cs5 W1 54.0(4) . . ?  
O18 Cs5 W1 25.7(4) . . ?  
O104 Cs5 W1 129.7(4) 2\_655 . ?  
W22 Cs5 W1 108.04(10) 2\_655 . ?  
O393 Cs5 W23 84.2(7) 2\_655 2\_655 ?  
O78 Cs5 W23 26.3(4) 2\_655 2\_655 ?  
O94 Cs5 W23 27.6(4) 2\_655 2\_655 ?  
O38 Cs5 W23 66.8(5) 2\_655 2\_655 ?  
O95 Cs5 W23 72.1(3) 2\_655 2\_655 ?  
O13 Cs5 W23 134.9(4) . 2\_655 ?  
O19 Cs5 W23 136.5(4) . 2\_655 ?  
O18 Cs5 W23 177.4(4) . 2\_655 ?  
O104 Cs5 W23 59.0(4) 2\_655 2\_655 ?  
W22 Cs5 W23 52.36(6) 2\_655 2\_655 ?  
W1 Cs5 W23 153.81(12) . 2\_655 ?  
O58 Cs4 O79 63.8(6) 2 2 ?  
O58 Cs4 O66 118.0(6) 2 . ?  
O79 Cs4 O66 130.8(6) 2 . ?  
O58 Cs4 O121 134.8(6) 2 2 ?  
O79 Cs4 O121 82.3(6) 2 2 ?  
O66 Cs4 O121 106.7(6) . 2 ?  
O58 Cs4 O45 51.1(5) 2 2 ?  
O79 Cs4 O45 103.7(5) 2 2 ?  
O66 Cs4 O45 113.2(5) . 2 ?  
O121 Cs4 O45 117.3(5) 2 2 ?  
O58 Cs4 O56 97.9(6) 2 2 ?  
O79 Cs4 O56 120.4(6) 2 2 ?  
O66 Cs4 O56 108.3(6) . 2 ?  
O121 Cs4 O56 73.3(6) 2 2 ?  
O45 Cs4 O56 49.6(6) 2 2 ?  
O58 Cs4 O324 77.8(4) 2 . ?  
O79 Cs4 O324 140.6(4) 2 . ?  
O66 Cs4 O324 60.5(4) . . ?  
O121 Cs4 O324 134.9(4) 2 . ?  
O45 Cs4 O324 52.7(3) 2 . ?  
O56 Cs4 O324 71.5(4) 2 . ?  
O58 Cs4 O70 160.6(6) 2 . ?  
O79 Cs4 O70 135.4(6) 2 . ?  
O66 Cs4 O70 50.2(6) . . ?  
O121 Cs4 O70 61.5(6) 2 . ?  
O45 Cs4 O70 115.3(5) 2 . ?  
O56 Cs4 O70 75.2(6) 2 . ?  
O324 Cs4 O70 82.8(4) . . ?  
O58 Cs4 O69 84.0(6) 2 . ?  
O79 Cs4 O69 82.2(6) 2 . ?  
O66 Cs4 O69 51.5(6) . . ?  
O121 Cs4 O69 121.8(6) 2 . ?  
O45 Cs4 O69 120.8(6) 2 . ?  
O56 Cs4 O69 155.9(6) 2 . ?  
O324 Cs4 O69 85.6(4) . . ?  
O70 Cs4 O69 95.0(6) . . ?  
O58 Cs4 O326 120.6(7) 2 2 ?  
O79 Cs4 O326 70.0(7) 2 2 ?  
O66 Cs4 O326 69.4(7) . 2 ?  
O121 Cs4 O326 68.0(7) 2 2 ?  
O45 Cs4 O326 171.7(7) 2 2 ?  
O56 Cs4 O326 138.1(8) 2 2 ?  
O324 Cs4 O326 128.9(6) . 2 ?  
O70 Cs4 O326 72.6(7) . 2 ?  
O69 Cs4 O326 53.9(8) . 2 ?  
O58 Cs4 O110 59.7(5) 2 2 ?  
O79 Cs4 O110 51.4(5) 2 2 ?  
O66 Cs4 O110 176.5(5) . 2 ?

O121 Cs4 O110 76.0(5) 2 2 ?  
O45 Cs4 O110 63.3(4) 2 2 ?  
O56 Cs4 O110 70.0(5) 2 2 ?  
O324 Cs4 O110 116.0(3) . 2 ?  
O70 Cs4 O110 131.0(5) . 2 ?  
O69 Cs4 O110 129.3(5) . 2 ?  
O326 Cs4 O110 113.9(7) 2 2 ?  
O58 Cs4 W13 23.3(4) 2 2 ?  
O79 Cs4 W13 82.0(4) 2 2 ?  
O66 Cs4 W13 118.3(4) . 2 ?  
O121 Cs4 W13 131.4(4) 2 2 ?  
O45 Cs4 W13 27.8(3) 2 2 ?  
O56 Cs4 W13 75.9(4) 2 2 ?  
O324 Cs4 W13 63.79(5) . 2 ?  
O70 Cs4 W13 141.3(4) . 2 ?  
O69 Cs4 W13 101.1(4) . 2 ?  
O326 Cs4 W13 143.9(6) 2 2 ?  
O110 Cs4 W13 58.5(3) 2 2 ?  
O131 Cs3 O163 131.4(6) . . ?  
O131 Cs3 O192 68.6(6) . . ?  
O163 Cs3 O192 90.1(5) . . ?  
O131 Cs3 O156 79.6(5) . . ?  
O163 Cs3 O156 146.5(6) . . ?  
O192 Cs3 O156 91.6(5) . . ?  
O131 Cs3 O306 88.6(6) . . ?  
O163 Cs3 O306 69.7(6) . . ?  
O192 Cs3 O306 127.1(5) . . ?  
O156 Cs3 O306 131.9(5) . . ?  
O131 Cs3 O162 167.8(6) . . ?  
O163 Cs3 O162 49.8(5) . . ?  
O192 Cs3 O162 99.8(5) . . ?  
O156 Cs3 O162 97.1(5) . . ?  
O306 Cs3 O162 102.1(5) . . ?  
O131 Cs3 O307 77.5(5) . . ?  
O163 Cs3 O307 55.1(6) . . ?  
O192 Cs3 O307 78.7(5) . . ?  
O156 Cs3 O307 157.1(5) . . ?  
O306 Cs3 O307 49.3(5) . . ?  
O162 Cs3 O307 104.9(5) . . ?  
O131 Cs3 O304 123.2(7) . . ?  
O163 Cs3 O304 78.8(6) . . ?  
O192 Cs3 O304 167.5(6) . . ?  
O156 Cs3 O304 94.4(6) . . ?  
O306 Cs3 O304 54.4(6) . . ?  
O162 Cs3 O304 68.6(6) . . ?  
O307 Cs3 O304 99.3(6) . . ?  
O131 Cs3 O305 80.0(6) . . ?  
O163 Cs3 O305 126.5(6) . . ?  
O192 Cs3 O305 142.7(6) . . ?  
O156 Cs3 O305 62.5(6) . . ?  
O306 Cs3 O305 69.6(6) . . ?  
O162 Cs3 O305 109.1(6) . . ?  
O307 Cs3 O305 114.5(6) . . ?  
O304 Cs3 O305 49.3(7) . . ?  
O131 Cs3 O115 89.8(5) . . ?  
O163 Cs3 O115 110.4(5) . . ?  
O192 Cs3 O115 50.9(5) . . ?  
O156 Cs3 O115 49.2(5) . . ?  
O306 Cs3 O115 177.9(5) . . ?  
O162 Cs3 O115 79.3(5) . . ?  
O307 Cs3 O115 128.9(5) . . ?  
O304 Cs3 O115 127.7(6) . . ?  
O305 Cs3 O115 111.6(6) . . ?  
O131 Cs3 O112 129.6(5) . . ?

O163 Cs3 O112 98.7(5) . . ?  
O192 Cs3 O112 112.7(5) . . ?  
O156 Cs3 O112 50.3(5) . . ?  
O306 Cs3 O112 118.4(5) . . ?  
O162 Cs3 O112 49.8(5) . . ?  
O307 Cs3 O112 152.5(5) . . ?  
O304 Cs3 O112 64.0(6) . . ?  
O305 Cs3 O112 72.5(6) . . ?  
O115 Cs3 O112 63.8(5) . . ?  
O131 Cs3 O161 122.1(5) . . ?  
O163 Cs3 O161 56.3(5) . . ?  
O192 Cs3 O161 53.4(5) . . ?  
O156 Cs3 O161 99.2(5) . . ?  
O306 Cs3 O161 125.8(5) . . ?  
O162 Cs3 O161 46.5(5) . . ?  
O307 Cs3 O161 91.5(5) . . ?  
O304 Cs3 O161 114.6(6) . . ?  
O305 Cs3 O161 150.1(6) . . ?  
O115 Cs3 O161 54.1(5) . . ?  
O112 Cs3 O161 77.6(5) . . ?  
O113 Cs2 O109 89.5(6) . . ?  
O113 Cs2 O37 176.4(6) . . ?  
O109 Cs2 O37 93.6(6) . . ?  
O113 Cs2 O157 95.7(6) . . ?  
O109 Cs2 O157 51.0(5) . . ?  
O37 Cs2 O157 84.8(6) . . ?  
O113 Cs2 O160 52.5(6) . . ?  
O109 Cs2 O160 90.7(5) . . ?  
O37 Cs2 O160 129.2(6) . . ?  
O157 Cs2 O160 133.0(6) . . ?  
O113 Cs2 O93 100.5(5) . . ?  
O109 Cs2 O93 98.7(5) . . ?  
O37 Cs2 O93 77.2(5) . . ?  
O157 Cs2 O93 47.8(5) . . ?  
O160 Cs2 O93 151.6(5) . . ?  
O113 Cs2 O76 122.0(6) . . ?  
O109 Cs2 O76 85.8(5) . . ?  
O37 Cs2 O76 60.2(6) . . ?  
O157 Cs2 O76 123.3(6) . . ?  
O160 Cs2 O76 69.7(6) . . ?  
O93 Cs2 O76 137.3(6) . . ?  
O113 Cs2 O179 50.2(5) . . ?  
O109 Cs2 O179 131.3(5) . . ?  
O37 Cs2 O179 128.0(5) . . ?  
O157 Cs2 O179 141.1(6) . . ?  
O160 Cs2 O179 45.1(5) . . ?  
O93 Cs2 O179 113.0(5) . . ?  
O76 Cs2 O179 93.8(5) . . ?  
O113 Cs2 O91 55.5(6) . . ?  
O109 Cs2 O91 92.9(5) . . ?  
O37 Cs2 O91 122.4(5) . . ?  
O157 Cs2 O91 57.2(6) . . ?  
O160 Cs2 O91 107.8(6) . . ?  
O93 Cs2 O91 45.3(5) . . ?  
O76 Cs2 O91 177.2(6) . . ?  
O179 Cs2 O91 85.2(5) . . ?  
O113 Cs2 O359 95.4(11) . . ?  
O109 Cs2 O359 170.2(10) . . ?  
O37 Cs2 O359 81.3(11) . . ?  
O157 Cs2 O359 119.9(10) . . ?  
O160 Cs2 O359 99.0(11) . . ?  
O93 Cs2 O359 72.1(10) . . ?  
O76 Cs2 O359 98.6(11) . . ?  
O179 Cs2 O359 57.4(11) . . ?

O91 Cs2 O359 83.0(11) . . ?  
O113 Cs2 O111 54.9(5) . . ?  
O109 Cs2 O111 46.1(5) . . ?  
O37 Cs2 O111 126.6(5) . . ?  
O157 Cs2 O111 44.1(5) . . ?  
O160 Cs2 O111 90.8(5) . . ?  
O93 Cs2 O111 77.1(4) . . ?  
O76 Cs2 O111 128.7(5) . . ?  
O179 Cs2 O111 105.1(5) . . ?  
O91 Cs2 O111 49.4(5) . . ?  
O359 Cs2 O111 131.8(10) . . ?  
O113 Cs2 O378 109.6(6) . . ?  
O109 Cs2 O378 141.4(5) . . ?  
O37 Cs2 O378 69.0(6) . . ?  
O157 Cs2 O378 150.0(6) . . ?  
O160 Cs2 O378 76.7(6) . . ?  
O93 Cs2 O378 109.7(5) . . ?  
O76 Cs2 O378 55.6(6) . . ?  
O179 Cs2 O378 59.5(6) . . ?  
O91 Cs2 O378 125.6(5) . . ?  
O359 Cs2 O378 43.9(10) . . ?  
O111 Cs2 O378 164.5(5) . . ?  
O360 Cs6 O399 127.9(13) . . ?  
O360 Cs6 O229 72.2(13) . . ?  
O399 Cs6 O229 67.7(6) . . ?  
O360 Cs6 O129 143.0(13) . . ?  
O399 Cs6 O129 62.3(6) . . ?  
O229 Cs6 O129 83.8(6) . . ?  
O360 Cs6 Na12 136.4(14) . . ?  
O399 Cs6 Na12 82.6(6) . . ?  
O229 Cs6 Na12 149.3(6) . . ?  
O129 Cs6 Na12 75.3(6) . . ?  
O360 Cs6 O208 69.4(13) . . ?  
O399 Cs6 O208 103.2(7) . . ?  
O229 Cs6 O208 47.0(6) . . ?  
O129 Cs6 O208 73.6(6) . . ?  
Na12 Cs6 O208 140.8(6) . . ?  
O360 Cs6 O248 115.2(13) . . ?  
O399 Cs6 O248 50.3(7) . . ?  
O229 Cs6 O248 105.5(6) . . ?  
O129 Cs6 O248 97.9(6) . . ?  
Na12 Cs6 O248 56.8(5) . . ?  
O208 Cs6 O248 151.2(7) . . ?  
O360 Cs6 O309 70.2(13) . . ?  
O399 Cs6 O309 74.1(6) . . ?  
O229 Cs6 O309 84.5(6) . . ?  
O129 Cs6 O309 136.1(6) . . ?  
Na12 Cs6 O309 95.1(5) . . ?  
O208 Cs6 O309 124.0(6) . . ?  
O248 Cs6 O309 45.8(5) . . ?  
O360 Cs6 W63 94.1(12) . . ?  
O399 Cs6 W63 63.9(5) . . ?  
O229 Cs6 W63 101.5(4) . . ?  
O129 Cs6 W63 118.6(4) . . ?  
Na12 Cs6 W63 70.4(4) . . ?  
O208 Cs6 W63 147.1(5) . . ?  
O248 Cs6 W63 21.2(4) . . ?  
O309 Cs6 W63 26.0(3) . . ?  
O360 Cs6 Cs1 111.6(12) . . ?  
O399 Cs6 Cs1 99.0(5) . . ?  
O229 Cs6 Cs1 88.0(4) . . ?  
O129 Cs6 Cs1 38.1(4) . . ?  
Na12 Cs6 Cs1 89.2(4) . . ?  
O208 Cs6 Cs1 51.6(5) . . ?

O248 Cs6 Cs1 133.2(5) . . ?  
O309 Cs6 Cs1 171.2(4) . . ?  
W63 Cs6 Cs1 154.34(18) . . ?  
O354 Cs7 O61 62.9(7) . . ?  
O354 Cs7 Na26 123.0(7) . . ?  
O61 Cs7 Na26 99.9(6) . . ?  
O354 Cs7 O86 64.1(6) . 1\_565 ?  
O61 Cs7 O86 98.0(7) . 1\_565 ?  
Na26 Cs7 O86 162.0(6) . 1\_565 ?  
O354 Cs7 O119 111.1(7) . 1\_565 ?  
O61 Cs7 O119 156.9(7) . 1\_565 ?  
Na26 Cs7 O119 63.6(5) . 1\_565 ?  
O86 Cs7 O119 98.6(6) 1\_565 1\_565 ?  
O354 Cs7 O133 133.1(8) . 1\_565 ?  
O61 Cs7 O133 148.1(7) . 1\_565 ?  
Na26 Cs7 O133 91.3(6) . 1\_565 ?  
O86 Cs7 O133 74.6(6) 1\_565 1\_565 ?  
O119 Cs7 O133 53.2(6) 1\_565 1\_565 ?  
O354 Cs7 O135 60.8(7) . 1\_565 ?  
O61 Cs7 O135 110.1(7) . 1\_565 ?  
Na26 Cs7 O135 79.7(6) . 1\_565 ?  
O86 Cs7 O135 91.9(7) 1\_565 1\_565 ?  
O119 Cs7 O135 53.4(6) 1\_565 1\_565 ?  
O133 Cs7 O135 101.2(7) 1\_565 1\_565 ?  
O354 Cs7 O42 104.5(6) . . ?  
O61 Cs7 O42 50.1(6) . . ?  
Na26 Cs7 O42 100.3(6) . . ?  
O86 Cs7 O42 93.0(6) 1\_565 . ?  
O119 Cs7 O42 144.2(7) 1\_565 . ?  
O133 Cs7 O42 98.6(7) 1\_565 . ?  
O135 Cs7 O42 160.1(7) 1\_565 . ?  
O354 Cs7 O62 106.7(7) . . ?  
O61 Cs7 O62 48.1(7) . . ?  
Na26 Cs7 O62 59.0(6) . . ?  
O86 Cs7 O62 137.8(7) 1\_565 . ?  
O119 Cs7 O62 121.9(7) 1\_565 . ?  
O133 Cs7 O62 118.9(8) 1\_565 . ?  
O135 Cs7 O62 120.6(7) 1\_565 . ?  
O42 Cs7 O62 47.4(6) . . ?  
O354 Cs7 O381 112.1(10) . . ?  
O61 Cs7 O381 93.3(9) . . ?  
Na26 Cs7 O381 123.4(10) . . ?  
O86 Cs7 O381 57.6(10) 1\_565 . ?  
O119 Cs7 O381 109.2(9) 1\_565 . ?  
O133 Cs7 O381 56.2(9) 1\_565 . ?  
O135 Cs7 O381 144.4(10) 1\_565 . ?  
O42 Cs7 O381 51.0(9) . . ?  
O62 Cs7 O381 95.0(10) . . ?  
O354 Cs7 O50 64.7(7) . . ?  
O61 Cs7 O50 47.5(6) . . ?  
Na26 Cs7 O50 142.3(6) . . ?  
O86 Cs7 O50 55.1(6) 1\_565 . ?  
O119 Cs7 O50 153.2(7) 1\_565 . ?  
O133 Cs7 O50 108.7(7) 1\_565 . ?  
O135 Cs7 O50 124.7(7) 1\_565 . ?  
O42 Cs7 O50 46.5(6) . . ?  
O62 Cs7 O50 83.2(7) . . ?  
O381 Cs7 O50 54.9(9) . . ?  
O354 Cs7 O71 72.3(7) . . ?  
O61 Cs7 O71 46.5(7) . . ?  
Na26 Cs7 O71 60.4(6) . . ?  
O86 Cs7 O71 133.8(7) 1\_565 . ?  
O119 Cs7 O71 110.7(7) 1\_565 . ?  
O133 Cs7 O71 151.5(7) 1\_565 . ?



O135 Cs7 O71 79.1(7) 1\_565 . . ?  
O42 Cs7 O71 83.7(6) . . ?  
O62 Cs7 O71 44.8(7) . . ?  
O381 Cs7 O71 134.6(10) . . ?  
O50 Cs7 O71 93.6(7) . . ?  
O34 Gd1 O28 77.2(7) . . ?  
O34 Gd1 O77 139.7(8) . . ?  
O28 Gd1 O77 143.1(7) . . ?  
O34 Gd1 O29 109.9(7) . . ?  
O28 Gd1 O29 71.1(7) . . ?  
O77 Gd1 O29 90.6(7) . . ?  
O34 Gd1 O36 84.1(7) . . ?  
O28 Gd1 O36 80.3(8) . . ?  
O77 Gd1 O36 99.8(8) . . ?  
O29 Gd1 O36 143.7(8) . . ?  
O34 Gd1 O37 70.8(7) . . ?  
O28 Gd1 O37 122.8(7) . . ?  
O77 Gd1 O37 81.3(8) . . ?  
O29 Gd1 O37 76.9(7) . . ?  
O36 Gd1 O37 138.8(8) . . ?  
O34 Gd1 O72 73.0(8) . . ?  
O28 Gd1 O72 142.6(7) . . ?  
O77 Gd1 O72 69.6(7) . . ?  
O29 Gd1 O72 140.8(7) . . ?  
O36 Gd1 O72 74.7(8) . . ?  
O37 Gd1 O72 67.1(7) . . ?  
O34 Gd1 O38 144.7(8) . . ?  
O28 Gd1 O38 74.7(8) . . ?  
O77 Gd1 O38 70.7(8) . . ?  
O29 Gd1 O38 80.6(8) . . ?  
O36 Gd1 O38 70.5(8) . . ?  
O37 Gd1 O38 143.7(8) . . ?  
O72 Gd1 O38 120.5(8) . . ?  
O35 Gd2 O52 76.3(8) . . ?  
O35 Gd2 O73 68.9(8) . . ?  
O52 Gd2 O73 119.5(8) . . ?  
O35 Gd2 O74 137.6(8) . . ?  
O52 Gd2 O74 75.0(8) . . ?  
O73 Gd2 O74 153.5(8) . . ?  
O35 Gd2 O53 115.0(7) . . ?  
O52 Gd2 O53 74.0(8) . . ?  
O73 Gd2 O53 78.1(7) . . ?  
O74 Gd2 O53 86.0(7) . . ?  
O35 Gd2 O158 143.4(7) . . ?  
O52 Gd2 O158 139.6(8) . . ?  
O73 Gd2 O158 82.4(7) . . ?  
O74 Gd2 O158 73.7(7) . . ?  
O53 Gd2 O158 78.8(7) . . ?  
O35 Gd2 O76 80.1(8) . . ?  
O52 Gd2 O76 141.8(9) . . ?  
O73 Gd2 O76 77.6(8) . . ?  
O74 Gd2 O76 104.9(8) . . ?  
O53 Gd2 O76 143.9(8) . . ?  
O158 Gd2 O76 71.9(8) . . ?  
O35 Gd2 O75 69.8(8) . . ?  
O52 Gd2 O75 74.6(8) . . ?  
O73 Gd2 O75 130.3(8) . . ?  
O74 Gd2 O75 72.9(8) . . ?  
O53 Gd2 O75 145.8(8) . . ?  
O158 Gd2 O75 118.8(8) . . ?  
O76 Gd2 O75 69.3(8) . . ?  
O114 Gd3 O115 84.3(7) . . ?  
O114 Gd3 O91 112.0(8) . . ?  
O115 Gd3 O91 150.2(8) . . ?

O114 Gd3 O112 140.6(8) . . ?  
O115 Gd3 O112 99.4(7) . . ?  
O91 Gd3 O112 83.8(8) . . ?  
O114 Gd3 O111 70.5(7) . . ?  
O115 Gd3 O111 83.1(7) . . ?  
O91 Gd3 O111 79.7(7) . . ?  
O112 Gd3 O111 148.9(7) . . ?  
O114 Gd3 O88 75.1(7) . . ?  
O115 Gd3 O88 139.3(7) . . ?  
O91 Gd3 O88 70.5(8) . . ?  
O112 Gd3 O88 77.2(7) . . ?  
O111 Gd3 O88 120.6(7) . . ?  
O114 Gd3 O156 73.1(7) . . ?  
O115 Gd3 O156 69.1(7) . . ?  
O91 Gd3 O156 138.3(7) . . ?  
O112 Gd3 O156 71.8(7) . . ?  
O111 Gd3 O156 135.8(6) . . ?  
O88 Gd3 O156 71.5(7) . . ?  
O114 Gd3 O113 145.7(7) . . ?  
O115 Gd3 O113 72.2(7) . . ?  
O91 Gd3 O113 81.4(8) . . ?  
O112 Gd3 O113 69.6(7) . . ?  
O111 Gd3 O113 81.9(7) . . ?  
O88 Gd3 O113 138.4(7) . . ?  
O156 Gd3 O113 118.5(7) . . ?  
O114 Gd3 Cs3 110.4(5) . . ?  
O115 Gd3 Cs3 49.6(5) . . ?  
O91 Gd3 Cs3 134.4(6) . . ?  
O112 Gd3 Cs3 52.3(5) . . ?  
O111 Gd3 Cs3 130.9(4) . . ?  
O88 Gd3 Cs3 105.8(5) . . ?  
O156 Gd3 Cs3 45.7(4) . . ?  
O113 Gd3 Cs3 72.9(6) . . ?  
O114 Gd3 Cs2 123.7(5) . . ?  
O115 Gd3 Cs2 98.0(5) . . ?  
O91 Gd3 Cs2 52.3(6) . . ?  
O112 Gd3 Cs2 94.9(5) . . ?  
O111 Gd3 Cs2 54.2(5) . . ?  
O88 Gd3 Cs2 122.7(5) . . ?  
O156 Gd3 Cs2 158.9(4) . . ?  
O113 Gd3 Cs2 40.3(5) . . ?  
Cs3 Gd3 Cs2 113.18(5) . . ?  
O117 Gd4 O118 69.4(7) . . ?  
O117 Gd4 O123 111.8(7) . . ?  
O118 Gd4 O123 80.9(7) . . ?  
O117 Gd4 O124 73.0(7) . . ?  
O118 Gd4 O124 118.5(8) . . ?  
O123 Gd4 O124 70.2(7) . . ?  
O117 Gd4 O120 83.7(7) . . ?  
O118 Gd4 O120 80.3(7) . . ?  
O123 Gd4 O120 149.3(7) . . ?  
O124 Gd4 O120 140.4(7) . . ?  
O117 Gd4 O116 142.8(7) . . ?  
O118 Gd4 O116 75.7(7) . . ?  
O123 Gd4 O116 74.1(7) . . ?  
O124 Gd4 O116 138.0(7) . . ?  
O120 Gd4 O116 77.9(7) . . ?  
O117 Gd4 O122 140.7(7) . . ?  
O118 Gd4 O122 147.7(7) . . ?  
O123 Gd4 O122 76.1(7) . . ?  
O124 Gd4 O122 74.2(7) . . ?  
O120 Gd4 O122 109.2(7) . . ?  
O116 Gd4 O122 76.3(7) . . ?  
O117 Gd4 O121 72.6(7) . . ?

O118 Gd4 O121 133.2 (7) . . ?  
O123 Gd4 O121 139.7 (7) . . ?  
O124 Gd4 O121 73.4 (8) . . ?  
O120 Gd4 O121 69.2 (7) . . ?  
O116 Gd4 O121 127.9 (8) . . ?  
O122 Gd4 O121 77.8 (7) . . ?  
O193 Gd5 O194 147.0 (7) . . ?  
O193 Gd5 O192 146.6 (7) . . ?  
O194 Gd5 O192 63.3 (7) . . ?  
O193 Gd5 O161 111.1 (7) . . ?  
O194 Gd5 O161 82.4 (7) . . ?  
O192 Gd5 O161 79.5 (7) . . ?  
O193 Gd5 O190 71.9 (7) . . ?  
O194 Gd5 O190 141.1 (7) . . ?  
O192 Gd5 O190 79.2 (7) . . ?  
O161 Gd5 O190 80.7 (7) . . ?  
O193 Gd5 O191 81.3 (7) . . ?  
O194 Gd5 O191 102.4 (8) . . ?  
O192 Gd5 O191 76.2 (7) . . ?  
O161 Gd5 O191 149.6 (8) . . ?  
O190 Gd5 O191 77.0 (7) . . ?  
O193 Gd5 O159 75.2 (7) . . ?  
O194 Gd5 O159 82.1 (7) . . ?  
O192 Gd5 O159 136.6 (7) . . ?  
O161 Gd5 O159 70.2 (7) . . ?  
O190 Gd5 O159 123.5 (7) . . ?  
O191 Gd5 O159 140.0 (7) . . ?  
O193 Gd5 O189 74.3 (7) . . ?  
O194 Gd5 O189 76.5 (7) . . ?  
O192 Gd5 O189 118.9 (7) . . ?  
O161 Gd5 O189 139.5 (8) . . ?  
O190 Gd5 O189 135.3 (7) . . ?  
O191 Gd5 O189 69.7 (8) . . ?  
O159 Gd5 O189 73.0 (7) . . ?  
O193 Gd5 W41 173.3 (5) . . ?  
O194 Gd5 W41 30.9 (5) . . ?  
O192 Gd5 W41 32.8 (5) . . ?  
O161 Gd5 W41 75.6 (5) . . ?  
O190 Gd5 W41 110.5 (5) . . ?  
O191 Gd5 W41 93.0 (5) . . ?  
O159 Gd5 W41 107.6 (5) . . ?  
O189 Gd5 W41 100.5 (5) . . ?  
O193 Gd5 Cs3 126.5 (5) . . ?  
O194 Gd5 Cs3 85.5 (5) . . ?  
O192 Gd5 Cs3 37.9 (5) . . ?  
O161 Gd5 Cs3 49.6 (5) . . ?  
O190 Gd5 Cs3 57.1 (4) . . ?  
O191 Gd5 Cs3 100.3 (5) . . ?  
O159 Gd5 Cs3 119.6 (5) . . ?  
O189 Gd5 Cs3 156.5 (5) . . ?  
W41 Gd5 Cs3 57.85 (4) . . ?  
O195 Gd6 O201 76.9 (8) . . ?  
O195 Gd6 O204 106.3 (8) . . ?  
O201 Gd6 O204 72.7 (8) . . ?  
O195 Gd6 O169 84.4 (7) . . ?  
O201 Gd6 O169 141.0 (8) . . ?  
O204 Gd6 O169 146.1 (7) . . ?  
O195 Gd6 O231 142.2 (7) . . ?  
O201 Gd6 O231 139.5 (8) . . ?  
O204 Gd6 O231 82.8 (8) . . ?  
O169 Gd6 O231 70.5 (7) . . ?  
O195 Gd6 O229 73.4 (7) . . ?  
O201 Gd6 O229 127.4 (8) . . ?  
O204 Gd6 O229 75.4 (8) . . ?

O169 Gd6 O229 77.3 (7) . . ?  
O231 Gd6 O229 73.7 (8) . . ?  
O195 Gd6 O232 77.8 (8) . . ?  
O201 Gd6 O232 75.2 (8) . . ?  
O204 Gd6 O232 145.5 (8) . . ?  
O169 Gd6 O232 67.5 (7) . . ?  
O231 Gd6 O232 115.4 (8) . . ?  
O229 Gd6 O232 136.2 (8) . . ?  
O195 Gd6 O230 145.1 (9) . . ?  
O201 Gd6 O230 78.2 (9) . . ?  
O204 Gd6 O230 89.0 (9) . . ?  
O169 Gd6 O230 100.2 (8) . . ?  
O231 Gd6 O230 69.4 (9) . . ?  
O229 Gd6 O230 141.4 (9) . . ?  
O232 Gd6 O230 72.4 (9) . . ?  
O195 Gd6 K3 113.7 (5) . 2\_546 ?  
O201 Gd6 K3 113.4 (6) . 2\_546 ?  
O204 Gd6 K3 140.0 (6) . 2\_546 ?  
O169 Gd6 K3 45.2 (5) . 2\_546 ?  
O231 Gd6 K3 67.5 (5) . 2\_546 ?  
O229 Gd6 K3 118.0 (5) . 2\_546 ?  
O232 Gd6 K3 48.0 (6) . 2\_546 ?  
O230 Gd6 K3 56.3 (7) . 2\_546 ?  
O261 Gd7 O237 141.1 (8) . 2\_546 ?  
O261 Gd7 O239 75.4 (8) . . ?  
O237 Gd7 O239 79.3 (8) 2\_546 . ?  
O261 Gd7 O236 113.7 (8) . . ?  
O237 Gd7 O236 84.1 (7) 2\_546 . ?  
O239 Gd7 O236 70.5 (8) . . ?  
O261 Gd7 O265 85.9 (8) . . ?  
O237 Gd7 O265 97.7 (8) 2\_546 . ?  
O239 Gd7 O265 143.3 (8) . . ?  
O236 Gd7 O265 146.1 (8) . . ?  
O261 Gd7 O262 68.8 (8) . . ?  
O237 Gd7 O262 150.1 (8) 2\_546 . ?  
O239 Gd7 O262 119.5 (8) . . ?  
O236 Gd7 O262 81.4 (8) . . ?  
O265 Gd7 O262 80.7 (8) . . ?  
O261 Gd7 O263 140.8 (9) . . ?  
O237 Gd7 O263 74.9 (8) 2\_546 . ?  
O239 Gd7 O263 140.2 (8) . . ?  
O236 Gd7 O263 77.1 (8) . . ?  
O265 Gd7 O263 70.9 (8) . . ?  
O262 Gd7 O263 76.4 (9) . . ?  
O261 Gd7 O264 72.3 (8) . . ?  
O237 Gd7 O264 72.4 (8) 2\_546 . ?  
O239 Gd7 O264 73.0 (8) . . ?  
O236 Gd7 O264 139.5 (8) . . ?  
O265 Gd7 O264 71.3 (9) . . ?  
O262 Gd7 O264 133.1 (8) . . ?  
O263 Gd7 O264 125.1 (9) . . ?  
O261 Gd7 K3 124.1 (6) . 2\_546 ?  
O237 Gd7 K3 93.9 (5) 2\_546 2\_546 ?  
O239 Gd7 K3 118.3 (5) . 2\_546 ?  
O236 Gd7 K3 47.8 (6) . 2\_546 ?  
O265 Gd7 K3 98.4 (6) . 2\_546 ?  
O262 Gd7 K3 57.3 (6) . 2\_546 ?  
O263 Gd7 K3 36.3 (6) . 2\_546 ?  
O264 Gd7 K3 160.9 (6) . 2\_546 ?  
O272 Gd8 O302 73.1 (9) . . ?  
O272 Gd8 O304 74.0 (10) . . ?  
O302 Gd8 O304 145.8 (9) . . ?  
O272 Gd8 O278 124.4 (9) . . ?  
O302 Gd8 O278 74.0 (8) . . ?

O304 Gd8 O278 134.4(9) . . ?  
O272 Gd8 O275 81.5(9) . . ?  
O302 Gd8 O275 111.6(9) . . ?  
O304 Gd8 O275 72.1(9) . . ?  
O278 Gd8 O275 70.7(9) . . ?  
O272 Gd8 O305 144.7(10) . . ?  
O302 Gd8 O305 142.2(9) . . ?  
O304 Gd8 O305 71.1(10) . . ?  
O278 Gd8 O305 79.2(9) . . ?  
O275 Gd8 O305 83.3(9) . . ?  
O272 Gd8 O303 135.0(10) . . ?  
O302 Gd8 O303 76.4(9) . . ?  
O304 Gd8 O303 123.2(10) . . ?  
O278 Gd8 O303 76.0(8) . . ?  
O275 Gd8 O303 141.3(9) . . ?  
O305 Gd8 O303 71.5(9) . . ?  
O272 Gd8 O306 75.2(9) . . ?  
O302 Gd8 O306 87.1(8) . . ?  
O304 Gd8 O306 75.7(9) . . ?  
O278 Gd8 O306 145.0(8) . . ?  
O275 Gd8 O306 144.3(8) . . ?  
O305 Gd8 O306 100.6(8) . . ?  
O303 Gd8 O306 71.0(8) . . ?  
O272 Gd8 Cs3 107.1(7) . . ?  
O302 Gd8 Cs3 133.2(5) . . ?  
O304 Gd8 Cs3 51.2(7) . . ?  
O278 Gd8 Cs3 128.1(6) . . ?  
O275 Gd8 Cs3 114.7(7) . . ?  
O305 Gd8 Cs3 52.4(6) . . ?  
O303 Gd8 Cs3 72.2(7) . . ?  
O306 Gd8 Cs3 50.3(5) . . ?  
O1 W1 O18 100.3(11) . . ?  
O1 W1 O13 99.9(11) . . ?  
O18 W1 O13 91.0(9) . . ?  
O1 W1 O10 98.2(11) . . ?  
O18 W1 O10 161.4(10) . . ?  
O13 W1 O10 87.3(9) . . ?  
O1 W1 O12 102.5(11) . . ?  
O18 W1 O12 88.6(9) . . ?  
O13 W1 O12 157.2(10) . . ?  
O10 W1 O12 86.0(9) . . ?  
O1 W1 O27 171.5(10) . . ?  
O18 W1 O27 73.7(9) . . ?  
O13 W1 O27 74.4(9) . . ?  
O10 W1 O27 88.0(9) . . ?  
O12 W1 O27 83.6(8) . . ?  
O1 W1 Cs5 72.9(9) . . ?  
O18 W1 Cs5 54.6(7) . . ?  
O13 W1 Cs5 52.1(7) . . ?  
O10 W1 Cs5 134.1(7) . . ?  
O12 W1 Cs5 139.8(6) . . ?  
O27 W1 Cs5 98.6(5) . . ?  
O2 W2 O14 102.0(11) . . ?  
O2 W2 O15 100.8(11) . . ?  
O14 W2 O15 94.4(10) . . ?  
O2 W2 O10 100.3(11) . . ?  
O14 W2 O10 89.3(10) . . ?  
O15 W2 O10 157.3(9) . . ?  
O2 W2 O11 97.1(10) . . ?  
O14 W2 O11 160.7(10) . . ?  
O15 W2 O11 85.0(9) . . ?  
O10 W2 O11 84.3(9) . . ?  
O2 W2 O26 172.7(11) . . ?  
O14 W2 O26 75.1(9) . . ?

O15 W2 O26 73.0(8) . . ?  
O10 W2 O26 86.4(9) . . ?  
O11 W2 O26 86.3(8) . . ?  
O2 W2 K4 84.8(9) . 1\_655 ?  
O14 W2 K4 137.1(8) . 1\_655 ?  
O15 W2 K4 43.1(6) . 1\_655 ?  
O10 W2 K4 131.6(7) . 1\_655 ?  
O11 W2 K4 47.5(6) . 1\_655 ?  
O26 W2 K4 92.8(5) . 1\_655 ?  
O3 W3 O16 103.0(11) . . ?  
O3 W3 O11 100.6(10) . . ?  
O16 W3 O11 93.4(10) . . ?  
O3 W3 O12 100.3(11) . . ?  
O16 W3 O12 155.9(10) . . ?  
O11 W3 O12 88.2(9) . . ?  
O3 W3 O17 97.6(10) . . ?  
O16 W3 O17 87.8(10) . . ?  
O11 W3 O17 161.0(9) . . ?  
O12 W3 O17 83.1(9) . . ?  
O3 W3 O25 168.5(9) . . ?  
O16 W3 O25 72.1(9) . . ?  
O11 W3 O25 90.1(8) . . ?  
O12 W3 O25 83.9(8) . . ?  
O17 W3 O25 72.2(8) . . ?  
O3 W3 K4 88.1(8) . 1\_655 ?  
O16 W3 K4 51.3(7) . 1\_655 ?  
O11 W3 K4 47.9(7) . 1\_655 ?  
O12 W3 K4 136.1(6) . 1\_655 ?  
O17 W3 K4 138.8(7) . 1\_655 ?  
O25 W3 K4 96.2(5) . 1\_655 ?  
O4 W4 O31 105.3(11) . . ?  
O4 W4 O22 101.7(10) . . ?  
O31 W4 O22 94.3(10) . . ?  
O4 W4 O23 99.1(10) . . ?  
O31 W4 O23 93.9(9) . . ?  
O22 W4 O23 154.7(10) . . ?  
O4 W4 O16 94.9(10) . . ?  
O31 W4 O16 159.7(10) . . ?  
O22 W4 O16 81.5(9) . . ?  
O23 W4 O16 82.5(9) . . ?  
O4 W4 O25 160.4(9) . . ?  
O31 W4 O25 92.5(9) . . ?  
O22 W4 O25 84.8(8) . . ?  
O23 W4 O25 71.0(8) . . ?  
O16 W4 O25 67.5(8) . . ?  
O4 W4 Na20 47.4(9) . . ?  
O31 W4 Na20 89.3(8) . . ?  
O22 W4 Na20 148.4(8) . . ?  
O23 W4 Na20 55.5(7) . . ?  
O16 W4 Na20 104.7(7) . . ?  
O25 W4 Na20 126.5(6) . . ?  
O4 W4 K4 82.5(8) . 1\_655 ?  
O31 W4 K4 133.7(7) . 1\_655 ?  
O22 W4 K4 40.2(7) . 1\_655 ?  
O23 W4 K4 130.5(6) . 1\_655 ?  
O16 W4 K4 48.3(6) . 1\_655 ?  
O25 W4 K4 91.2(5) . 1\_655 ?  
Na20 W4 K4 123.9(4) . 1\_655 ?  
O5 W5 O30 104.7(11) . . ?  
O5 W5 O22 101.3(11) . . ?  
O30 W5 O22 93.9(10) . . ?  
O5 W5 O21 100.2(11) . . ?  
O30 W5 O21 91.7(10) . . ?  
O22 W5 O21 155.5(10) . . ?

O5 W5 O15 93.6(10) . . ?  
O30 W5 O15 161.5(10) . . ?  
O22 W5 O15 84.9(9) . . ?  
O21 W5 O15 82.2(9) . . ?  
O5 W5 O26 163.8(10) . . ?  
O30 W5 O26 89.6(9) . . ?  
O22 W5 O26 84.8(9) . . ?  
O21 W5 O26 71.4(9) . . ?  
O15 W5 O26 71.8(8) . . ?  
O5 W5 K4 77.3(8) . 1\_655 ?  
O30 W5 K4 138.7(7) . 1\_655 ?  
O22 W5 K4 46.7(7) . 1\_655 ?  
O21 W5 K4 129.0(7) . 1\_655 ?  
O15 W5 K4 47.8(6) . 1\_655 ?  
O26 W5 K4 96.9(6) . 1\_655 ?  
O6 W6 O29 105.1(10) . . ?  
O6 W6 O20 101.3(10) . . ?  
O29 W6 O20 91.2(10) . . ?  
O6 W6 O21 99.3(10) . . ?  
O29 W6 O21 97.0(10) . . ?  
O20 W6 O21 155.0(9) . . ?  
O6 W6 O14 93.8(10) . . ?  
O29 W6 O14 160.7(9) . . ?  
O20 W6 O14 81.3(10) . . ?  
O21 W6 O14 83.3(10) . . ?  
O6 W6 O26 166.0(9) . . ?  
O29 W6 O26 88.1(9) . . ?  
O20 W6 O26 82.7(9) . . ?  
O21 W6 O26 74.0(9) . . ?  
O14 W6 O26 73.3(9) . . ?  
O7 W7 O28 106.0(9) . . ?  
O7 W7 O20 100.6(9) . . ?  
O28 W7 O20 91.3(10) . . ?  
O7 W7 O19 98.1(9) . . ?  
O28 W7 O19 93.0(9) . . ?  
O20 W7 O19 158.9(9) . . ?  
O7 W7 O13 94.5(9) . . ?  
O28 W7 O13 159.6(9) . . ?  
O20 W7 O13 85.2(9) . . ?  
O19 W7 O13 83.6(9) . . ?  
O7 W7 O27 164.6(9) . . ?  
O28 W7 O27 87.5(8) . . ?  
O20 W7 O27 86.2(8) . . ?  
O19 W7 O27 73.3(8) . . ?  
O13 W7 O27 72.1(8) . . ?  
O7 W7 Cs5 71.1(7) . . ?  
O28 W7 Cs5 139.0(6) . . ?  
O20 W7 Cs5 129.8(7) . . ?  
O19 W7 Cs5 49.0(7) . . ?  
O13 W7 Cs5 48.0(6) . . ?  
O27 W7 Cs5 93.8(6) . . ?  
O8 W8 O33 104.5(11) . . ?  
O8 W8 O19 102.8(10) . . ?  
O33 W8 O19 94.2(10) . . ?  
O8 W8 O24 102.2(10) . . ?  
O33 W8 O24 87.0(10) . . ?  
O19 W8 O24 153.9(9) . . ?  
O8 W8 O18 96.6(11) . . ?  
O33 W8 O18 158.1(10) . . ?  
O19 W8 O18 86.6(9) . . ?  
O24 W8 O18 82.8(9) . . ?  
O8 W8 O27 165.3(10) . . ?  
O33 W8 O27 89.8(9) . . ?  
O19 W8 O27 72.4(8) . . ?

O24 W8 O27 81.5(8) . . ?  
O18 W8 O27 69.5(8) . . ?  
O8 W8 Cs5 72.5(8) . . ?  
O33 W8 Cs5 140.4(7) . . ?  
O19 W8 Cs5 50.6(7) . . ?  
O24 W8 Cs5 132.5(6) . . ?  
O18 W8 Cs5 52.3(6) . . ?  
O27 W8 Cs5 94.5(5) . . ?  
O9 W9 O17 102.8(11) . . ?  
O9 W9 O23 98.8(11) . . ?  
O17 W9 O23 89.7(10) . . ?  
O9 W9 O24 99.6(11) . . ?  
O17 W9 O24 88.2(10) . . ?  
O23 W9 O24 161.5(9) . . ?  
O9 W9 O32 100.5(11) . . ?  
O17 W9 O32 156.7(9) . . ?  
O23 W9 O32 86.9(9) . . ?  
O24 W9 O32 87.8(9) . . ?  
O9 W9 O25 170.4(10) . . ?  
O17 W9 O25 73.4(9) . . ?  
O23 W9 O25 72.6(8) . . ?  
O24 W9 O25 89.3(8) . . ?  
O32 W9 O25 83.5(8) . . ?  
O35 W10 O34 98.5(10) . . ?  
O35 W10 O32 92.9(9) . . ?  
O34 W10 O32 102.7(9) . . ?  
O35 W10 O40 100.3(10) . . ?  
O34 W10 O40 93.8(9) . . ?  
O32 W10 O40 157.1(9) . . ?  
O35 W10 O33 170.5(9) . . ?  
O34 W10 O33 89.9(9) . . ?  
O32 W10 O33 81.0(9) . . ?  
O40 W10 O33 83.3(9) . . ?  
O35 W10 O39 84.9(9) . . ?  
O34 W10 O39 172.7(9) . . ?  
O32 W10 O39 83.4(9) . . ?  
O40 W10 O39 79.2(9) . . ?  
O33 W10 O39 87.3(9) . . ?  
O50 W11 O39 102.9(12) . . ?  
O50 W11 O42 100.9(12) . . ?  
O39 W11 O42 94.1(10) . . ?  
O50 W11 O41 102.5(11) . . ?  
O39 W11 O41 88.9(9) . . ?  
O42 W11 O41 155.1(9) . . ?  
O50 W11 O61 94.2(12) . . ?  
O39 W11 O61 162.3(10) . . ?  
O42 W11 O61 86.9(9) . . ?  
O41 W11 O61 82.9(8) . . ?  
O50 W11 O48 162.7(11) . . ?  
O39 W11 O48 93.6(10) . . ?  
O42 W11 O48 72.5(9) . . ?  
O41 W11 O48 82.6(8) . . ?  
O61 W11 O48 69.8(9) . . ?  
O50 W11 Cs7 66.1(9) . . ?  
O39 W11 Cs7 144.6(7) . . ?  
O42 W11 Cs7 58.1(7) . . ?  
O41 W11 Cs7 125.7(6) . . ?  
O61 W11 Cs7 48.1(7) . . ?  
O48 W11 Cs7 97.4(5) . . ?  
O59 W12 O41 97.6(10) . . ?  
O59 W12 O40 104.6(11) . . ?  
O41 W12 O40 88.1(9) . . ?  
O59 W12 O60 102.6(10) . . ?  
O41 W12 O60 89.4(8) . . ?



O40 W12 O60 152.8 (9) . . ?  
O59 W12 O46 100.1 (10) . . ?  
O41 W12 O46 162.3 (9) . . ?  
O40 W12 O46 86.4 (9) . . ?  
O60 W12 O46 87.9 (8) . . ?  
O59 W12 O47 170.1 (10) . . ?  
O41 W12 O47 90.4 (8) . . ?  
O40 W12 O47 81.6 (8) . . ?  
O60 W12 O47 71.4 (8) . . ?  
O46 W12 O47 72.1 (7) . . ?  
O58 W13 O45 99.2 (9) . . ?  
O58 W13 O65 101.8 (9) . . ?  
O45 W13 O65 88.8 (9) . . ?  
O58 W13 O46 99.7 (9) . . ?  
O45 W13 O46 161.1 (8) . . ?  
O65 W13 O46 87.5 (9) . . ?  
O58 W13 O57 102.3 (9) . . ?  
O45 W13 O57 87.5 (8) . . ?  
O65 W13 O57 155.9 (8) . . ?  
O46 W13 O57 88.4 (8) . . ?  
O58 W13 O47 171.0 (9) . . ?  
O45 W13 O47 87.7 (7) . . ?  
O65 W13 O47 72.4 (8) . . ?  
O46 W13 O47 73.6 (8) . . ?  
O57 W13 O47 83.7 (8) . . ?  
O58 W13 Cs4 45.8 (7) . 2 ?  
O45 W13 Cs4 53.4 (6) . 2 ?  
O65 W13 Cs4 97.4 (7) . 2 ?  
O46 W13 Cs4 145.5 (6) . 2 ?  
O57 W13 Cs4 99.4 (6) . 2 ?  
O47 W13 Cs4 140.5 (5) . 2 ?  
O56 W14 O55 104.3 (11) . . ?  
O56 W14 O44 102.5 (11) . . ?  
O55 W14 O44 94.4 (10) . . ?  
O56 W14 O45 99.4 (10) . . ?  
O55 W14 O45 90.6 (9) . . ?  
O44 W14 O45 155.5 (9) . . ?  
O56 W14 O64 93.1 (11) . . ?  
O55 W14 O64 162.3 (10) . . ?  
O44 W14 O64 84.4 (10) . . ?  
O45 W14 O64 83.7 (9) . . ?  
O56 W14 O49 164.1 (10) . . ?  
O55 W14 O49 91.1 (9) . . ?  
O44 W14 O49 72.0 (9) . . ?  
O45 W14 O49 83.9 (8) . . ?  
O64 W14 O49 71.7 (8) . . ?  
O56 W14 Cs4 49.6 (8) . 2 ?  
O55 W14 Cs4 91.5 (7) . 2 ?  
O44 W14 Cs4 152.0 (8) . 2 ?  
O45 W14 Cs4 51.4 (6) . 2 ?  
O64 W14 Cs4 97.8 (6) . 2 ?  
O49 W14 Cs4 135.3 (5) . 2 ?  
O54 W15 O53 103.5 (10) . . ?  
O54 W15 O43 100.0 (10) . . ?  
O53 W15 O43 92.1 (9) . . ?  
O54 W15 O44 98.4 (11) . . ?  
O53 W15 O44 95.5 (10) . . ?  
O43 W15 O44 157.8 (10) . . ?  
O54 W15 O63 94.7 (10) . . ?  
O53 W15 O63 161.8 (9) . . ?  
O43 W15 O63 85.1 (9) . . ?  
O44 W15 O63 81.2 (10) . . ?  
O54 W15 O49 166.0 (9) . . ?  
O53 W15 O49 89.6 (9) . . ?

O43 W15 O49 84.1(8) . . ?  
O44 W15 O49 75.1(9) . . ?  
O63 W15 O49 72.2(8) . . ?  
O51 W16 O52 103.7(11) . . ?  
O51 W16 O43 101.8(11) . . ?  
O52 W16 O43 91.7(10) . . ?  
O51 W16 O42 96.4(11) . . ?  
O52 W16 O42 91.9(10) . . ?  
O43 W16 O42 160.0(9) . . ?  
O51 W16 O62 96.3(11) . . ?  
O52 W16 O62 159.9(10) . . ?  
O43 W16 O62 86.4(10) . . ?  
O42 W16 O62 83.6(10) . . ?  
O51 W16 O48 165.1(11) . . ?  
O52 W16 O48 88.9(9) . . ?  
O43 W16 O48 85.6(8) . . ?  
O42 W16 O48 74.9(9) . . ?  
O62 W16 O48 71.0(9) . . ?  
O51 W16 Cs7 78.9(9) . . ?  
O52 W16 Cs7 135.5(8) . . ?  
O43 W16 Cs7 131.9(6) . . ?  
O42 W16 Cs7 44.3(7) . . ?  
O62 W16 Cs7 46.5(8) . . ?  
O48 W16 Cs7 86.5(6) . . ?  
O71 W17 O62 102.0(13) . . ?  
O71 W17 O61 99.7(13) . . ?  
O62 W17 O61 93.1(12) . . ?  
O71 W17 O67 100.1(12) . . ?  
O62 W17 O67 93.5(11) . . ?  
O61 W17 O67 157.3(9) . . ?  
O71 W17 O68 99.5(12) . . ?  
O62 W17 O68 158.3(11) . . ?  
O61 W17 O68 86.1(10) . . ?  
O67 W17 O68 79.8(9) . . ?  
O71 W17 O48 173.3(12) . . ?  
O62 W17 O48 74.6(10) . . ?  
O61 W17 O48 74.9(9) . . ?  
O67 W17 O48 86.1(8) . . ?  
O68 W17 O48 84.3(8) . . ?  
O71 W17 Cs7 72.0(10) . . ?  
O62 W17 Cs7 61.5(10) . . ?  
O61 W17 Cs7 49.1(7) . . ?  
O67 W17 Cs7 150.0(6) . . ?  
O68 W17 Cs7 129.6(7) . . ?  
O48 W17 Cs7 101.3(6) . . ?  
O70 W18 O68 101.6(10) . . ?  
O70 W18 O66 102.3(11) . . ?  
O68 W18 O66 91.9(10) . . ?  
O70 W18 O60 97.5(10) . . ?  
O68 W18 O60 89.2(9) . . ?  
O66 W18 O60 159.5(9) . . ?  
O70 W18 O65 98.3(10) . . ?  
O68 W18 O65 159.4(9) . . ?  
O66 W18 O65 89.2(9) . . ?  
O60 W18 O65 82.9(9) . . ?  
O70 W18 O47 167.1(9) . . ?  
O68 W18 O47 86.9(8) . . ?  
O66 W18 O47 86.9(9) . . ?  
O60 W18 O47 72.7(8) . . ?  
O65 W18 O47 72.6(8) . . ?  
O70 W18 Cs4 53.1(8) . . ?  
O68 W18 Cs4 106.8(7) . . ?  
O66 W18 Cs4 49.8(7) . . ?  
O60 W18 Cs4 148.3(5) . . ?

O65 W18 Cs4 89.5(6) . . ?  
O47 W18 Cs4 133.8(5) . . ?  
O69 W19 O64 99.6(11) . . ?  
O69 W19 O67 99.5(11) . . ?  
O64 W19 O67 157.8(10) . . ?  
O69 W19 O63 103.4(11) . . ?  
O64 W19 O63 92.9(10) . . ?  
O67 W19 O63 93.4(9) . . ?  
O69 W19 O66 98.8(10) . . ?  
O64 W19 O66 84.2(10) . . ?  
O67 W19 O66 81.9(9) . . ?  
O63 W19 O66 157.8(9) . . ?  
O69 W19 O49 174.3(11) . . ?  
O64 W19 O49 76.2(9) . . ?  
O67 W19 O49 85.4(8) . . ?  
O63 W19 O49 73.2(9) . . ?  
O66 W19 O49 84.7(8) . . ?  
O69 W19 Cs4 51.2(8) . . ?  
O64 W19 Cs4 83.7(7) . . ?  
O67 W19 Cs4 99.8(6) . . ?  
O63 W19 Cs4 152.8(7) . . ?  
O66 W19 Cs4 48.9(6) . . ?  
O49 W19 Cs4 131.1(5) . . ?  
O73 W20 O72 100.9(10) . . ?  
O73 W20 O57 104.7(9) . . ?  
O72 W20 O57 93.5(10) . . ?  
O73 W20 O109 90.9(9) . . ?  
O72 W20 O109 101.7(9) . . ?  
O57 W20 O109 155.7(8) . . ?  
O73 W20 O110 158.7(9) . . ?  
O72 W20 O110 94.9(9) . . ?  
O57 W20 O110 88.3(8) . . ?  
O109 W20 O110 71.8(8) . . ?  
O73 W20 O55 84.4(9) . . ?  
O72 W20 O55 172.0(9) . . ?  
O57 W20 O55 79.2(9) . . ?  
O109 W20 O55 84.1(8) . . ?  
O110 W20 O55 81.6(8) . . ?  
O73 W20 Cs2 74.8(7) . . ?  
O72 W20 Cs2 63.6(7) . . ?  
O57 W20 Cs2 156.1(6) . . ?  
O109 W20 Cs2 45.9(6) . . ?  
O110 W20 Cs2 100.0(5) . . ?  
O55 W20 Cs2 124.0(6) . . ?  
O111 W21 O120 101.3(9) . . ?  
O111 W21 O109 96.6(9) . . ?  
O120 W21 O109 100.2(9) . . ?  
O111 W21 O80 104.5(9) . . ?  
O120 W21 O80 97.1(9) . . ?  
O109 W21 O80 149.4(9) . . ?  
O111 W21 O110 162.8(8) . . ?  
O120 W21 O110 93.5(9) . . ?  
O109 W21 O110 71.8(8) . . ?  
O80 W21 O110 82.2(8) . . ?  
O111 W21 O157 82.6(9) . . ?  
O120 W21 O157 175.4(9) . . ?  
O109 W21 O157 81.6(8) . . ?  
O80 W21 O157 79.5(8) . . ?  
O110 W21 O157 83.0(8) . . ?  
O111 W21 Cs2 63.5(6) . . ?  
O120 W21 Cs2 134.8(6) . . ?  
O109 W21 Cs2 46.0(6) . . ?  
O80 W21 Cs2 127.3(6) . . ?  
O110 W21 Cs2 99.7(5) . . ?

O157 W21 Cs2 49.1(6) . . ?  
O79 W22 O81 100.8(10) . . ?  
O79 W22 O78 100.0(10) . . ?  
O81 W22 O78 159.1(9) . . ?  
O79 W22 O80 101.3(9) . . ?  
O81 W22 O80 87.5(9) . . ?  
O78 W22 O80 86.2(8) . . ?  
O79 W22 O95 103.2(9) . . ?  
O81 W22 O95 88.2(9) . . ?  
O78 W22 O95 89.4(8) . . ?  
O80 W22 O95 155.5(9) . . ?  
O79 W22 O101 171.8(9) . . ?  
O81 W22 O101 71.9(9) . . ?  
O78 W22 O101 87.5(8) . . ?  
O80 W22 O101 82.4(8) . . ?  
O95 W22 O101 73.3(8) . . ?  
O79 W22 Cs5 81.2(8) . 2\_655 ?  
O81 W22 Cs5 138.0(7) . 2\_655 ?  
O78 W22 Cs5 48.6(6) . 2\_655 ?  
O80 W22 Cs5 133.7(6) . 2\_655 ?  
O95 W22 Cs5 51.3(6) . 2\_655 ?  
O101 W22 Cs5 101.6(5) . 2\_655 ?  
O79 W22 Cs4 34.0(8) . 2 ?  
O81 W22 Cs4 75.5(7) . 2 ?  
O78 W22 Cs4 122.4(6) . 2 ?  
O80 W22 Cs4 77.9(6) . 2 ?  
O95 W22 Cs4 124.1(6) . 2 ?  
O101 W22 Cs4 142.4(5) . 2 ?  
Cs5 W22 Cs4 115.21(8) 2\_655 2 ?  
O77 W23 O157 102.7(11) . . ?  
O77 W23 O93 95.4(10) . . ?  
O157 W23 O93 94.4(10) . . ?  
O77 W23 O78 106.3(10) . . ?  
O157 W23 O78 87.7(9) . . ?  
O93 W23 O78 157.2(9) . . ?  
O77 W23 O94 92.2(10) . . ?  
O157 W23 O94 164.6(10) . . ?  
O93 W23 O94 87.6(8) . . ?  
O78 W23 O94 84.6(8) . . ?  
O77 W23 O102 161.7(9) . . ?  
O157 W23 O102 93.3(9) . . ?  
O93 W23 O102 74.6(8) . . ?  
O78 W23 O102 82.7(8) . . ?  
O94 W23 O102 72.5(8) . . ?  
O77 W23 Cs2 80.8(7) . . ?  
O157 W23 Cs2 46.3(7) . . ?  
O93 W23 Cs2 56.4(6) . . ?  
O78 W23 Cs2 133.2(6) . . ?  
O94 W23 Cs2 142.1(6) . . ?  
O102 W23 Cs2 104.9(5) . . ?  
O77 W23 Cs5 75.2(7) . 2\_655 ?  
O157 W23 Cs5 130.6(7) . 2\_655 ?  
O93 W23 Cs5 134.9(6) . 2\_655 ?  
O78 W23 Cs5 48.5(6) . 2\_655 ?  
O94 W23 Cs5 49.8(6) . 2\_655 ?  
O102 W23 Cs5 100.9(5) . 2\_655 ?  
Cs2 W23 Cs5 154.16(8) . 2\_655 ?  
O92 W24 O91 104.2(10) . . ?  
O92 W24 O90 104.1(9) . . ?  
O91 W24 O90 93.5(10) . . ?  
O92 W24 O93 96.0(9) . . ?  
O91 W24 O93 93.1(10) . . ?  
O90 W24 O93 156.6(8) . . ?  
O92 W24 O99 95.8(9) . . ?

O91 W24 O99 159.8(9) . . ?  
O90 W24 O99 84.2(8) . . ?  
O93 W24 O99 81.9(8) . . ?  
O92 W24 O102 164.4(9) . . ?  
O91 W24 O102 88.1(9) . . ?  
O90 W24 O102 84.4(8) . . ?  
O93 W24 O102 73.4(8) . . ?  
O99 W24 O102 71.8(7) . . ?  
O92 W24 Cs2 84.5(7) . . ?  
O91 W24 Cs2 51.5(8) . . ?  
O90 W24 Cs2 144.9(6) . . ?  
O93 W24 Cs2 48.1(6) . . ?  
O99 W24 Cs2 129.5(6) . . ?  
O102 W24 Cs2 96.1(5) . . ?  
O89 W25 O88 103.3(10) . . ?  
O89 W25 O90 102.6(10) . . ?  
O88 W25 O90 90.5(9) . . ?  
O89 W25 O87 96.5(10) . . ?  
O88 W25 O87 95.8(10) . . ?  
O90 W25 O87 158.0(10) . . ?  
O89 W25 O98 95.9(9) . . ?  
O88 W25 O98 160.8(9) . . ?  
O90 W25 O98 84.3(9) . . ?  
O87 W25 O98 82.8(9) . . ?  
O89 W25 O100 164.9(9) . . ?  
O88 W25 O100 89.4(8) . . ?  
O90 W25 O100 85.3(8) . . ?  
O87 W25 O100 73.7(9) . . ?  
O98 W25 O100 71.8(8) . . ?  
O86 W26 O85 103.5(10) . . ?  
O86 W26 O87 99.7(10) . . ?  
O85 W26 O87 94.4(10) . . ?  
O86 W26 O84 106.3(9) . . ?  
O85 W26 O84 88.7(9) . . ?  
O87 W26 O84 152.3(10) . . ?  
O86 W26 O97 92.1(9) . . ?  
O85 W26 O97 164.2(9) . . ?  
O87 W26 O97 85.4(9) . . ?  
O84 W26 O97 84.2(8) . . ?  
O86 W26 O100 161.0(8) . . ?  
O85 W26 O100 93.4(8) . . ?  
O87 W26 O100 70.1(9) . . ?  
O84 W26 O100 82.3(8) . . ?  
O97 W26 O100 71.6(8) . . ?  
O86 W26 Cs7 29.2(7) . 1\_545 ?  
O85 W26 Cs7 74.7(7) . 1\_545 ?  
O87 W26 Cs7 106.4(8) . 1\_545 ?  
O84 W26 Cs7 100.9(6) . 1\_545 ?  
O97 W26 Cs7 120.5(6) . 1\_545 ?  
O100 W26 Cs7 167.5(5) . 1\_545 ?  
O83 W27 O96 102.3(9) . . ?  
O83 W27 O84 102.5(10) . . ?  
O96 W27 O84 89.5(9) . . ?  
O83 W27 O82 105.2(10) . . ?  
O96 W27 O82 152.3(9) . . ?  
O84 W27 O82 87.2(9) . . ?  
O83 W27 O81 99.4(10) . . ?  
O96 W27 O81 85.4(9) . . ?  
O84 W27 O81 158.1(9) . . ?  
O82 W27 O81 87.5(10) . . ?  
O83 W27 O101 168.6(9) . . ?  
O96 W27 O101 72.3(8) . . ?  
O84 W27 O101 87.7(8) . . ?  
O82 W27 O101 80.2(9) . . ?

O81 W27 O101 70.5(8) . . ?  
O107 W28 O104 104.2(11) . . ?  
O107 W28 O103 103.8(10) . . ?  
O104 W28 O103 88.3(10) . . ?  
O107 W28 O95 96.6(10) . . ?  
O104 W28 O95 91.7(9) . . ?  
O103 W28 O95 159.0(9) . . ?  
O107 W28 O96 98.2(10) . . ?  
O104 W28 O96 157.1(9) . . ?  
O103 W28 O96 91.0(9) . . ?  
O95 W28 O96 81.0(8) . . ?  
O107 W28 O101 165.4(10) . . ?  
O104 W28 O101 86.6(9) . . ?  
O103 W28 O101 86.1(8) . . ?  
O95 W28 O101 73.0(8) . . ?  
O96 W28 O101 70.5(7) . . ?  
O107 W28 Cs5 81.3(9) . 2\_655 ?  
O104 W28 Cs5 52.5(7) . 2\_655 ?  
O103 W28 Cs5 139.8(6) . 2\_655 ?  
O95 W28 Cs5 48.2(6) . 2\_655 ?  
O96 W28 Cs5 128.2(6) . 2\_655 ?  
O101 W28 Cs5 98.2(5) . 2\_655 ?  
O108 W29 O99 100.4(10) . . ?  
O108 W29 O94 102.2(10) . . ?  
O99 W29 O94 93.2(9) . . ?  
O108 W29 O105 100.8(10) . . ?  
O99 W29 O105 92.3(9) . . ?  
O94 W29 O105 154.9(9) . . ?  
O108 W29 O104 102.6(10) . . ?  
O99 W29 O104 156.8(9) . . ?  
O94 W29 O104 85.0(9) . . ?  
O105 W29 O104 80.4(9) . . ?  
O108 W29 O102 172.0(9) . . ?  
O99 W29 O102 74.3(8) . . ?  
O94 W29 O102 72.5(8) . . ?  
O105 W29 O102 85.6(8) . . ?  
O104 W29 O102 83.2(8) . . ?  
O108 W29 Cs5 85.6(8) . 2\_655 ?  
O99 W29 Cs5 135.2(6) . 2\_655 ?  
O94 W29 Cs5 42.8(6) . 2\_655 ?  
O105 W29 Cs5 130.5(7) . 2\_655 ?  
O104 W29 Cs5 50.6(7) . 2\_655 ?  
O102 W29 Cs5 94.0(5) . 2\_655 ?  
O106 W30 O98 102.6(10) . . ?  
O106 W30 O105 100.3(10) . . ?  
O98 W30 O105 90.5(10) . . ?  
O106 W30 O97 100.6(10) . . ?  
O98 W30 O97 91.2(9) . . ?  
O105 W30 O97 158.1(9) . . ?  
O106 W30 O103 100.3(9) . . ?  
O98 W30 O103 156.9(9) . . ?  
O105 W30 O103 82.3(9) . . ?  
O97 W30 O103 87.7(9) . . ?  
O106 W30 O100 173.1(9) . . ?  
O98 W30 O100 72.7(8) . . ?  
O105 W30 O100 85.0(8) . . ?  
O97 W30 O100 74.7(8) . . ?  
O103 W30 O100 84.8(7) . . ?  
O117 W31 O114 100.2(9) . . ?  
O117 W31 O82 95.5(10) . . ?  
O114 W31 O82 98.1(10) . . ?  
O117 W31 O126 100.2(9) . . ?  
O114 W31 O126 94.8(9) . . ?  
O82 W31 O126 157.6(9) . . ?

O117 W31 O85 170.0(9) . . ?  
O114 W31 O85 88.7(9) . . ?  
O82 W31 O85 78.6(9) . . ?  
O126 W31 O85 83.4(9) . . ?  
O117 W31 O125 84.5(9) . . ?  
O114 W31 O125 174.5(9) . . ?  
O82 W31 O125 84.4(9) . . ?  
O126 W31 O125 81.3(9) . . ?  
O85 W31 O125 86.9(8) . . ?  
O135 W32 O125 102.6(11) . . ?  
O135 W32 O136 103.5(11) . . ?  
O125 W32 O136 95.1(10) . . ?  
O135 W32 O119 102.2(11) . . ?  
O125 W32 O119 87.5(10) . . ?  
O136 W32 O119 152.9(9) . . ?  
O135 W32 O144 93.9(11) . . ?  
O125 W32 O144 162.7(10) . . ?  
O136 W32 O144 86.2(10) . . ?  
O119 W32 O144 83.7(9) . . ?  
O135 W32 O143 163.4(10) . . ?  
O125 W32 O143 93.7(9) . . ?  
O136 W32 O143 70.9(8) . . ?  
O119 W32 O143 82.0(8) . . ?  
O144 W32 O143 70.4(8) . . ?  
O135 W32 Cs7 53.6(9) . 1\_545 ?  
O125 W32 Cs7 94.6(7) . 1\_545 ?  
O136 W32 Cs7 156.7(6) . 1\_545 ?  
O119 W32 Cs7 48.8(6) . 1\_545 ?  
O144 W32 Cs7 90.8(7) . 1\_545 ?  
O143 W32 Cs7 129.5(6) . 1\_545 ?  
O133 W33 O119 100.3(10) . . ?  
O133 W33 O149 101.3(11) . . ?  
O119 W33 O149 90.1(9) . . ?  
O133 W33 O126 104.8(11) . . ?  
O119 W33 O126 89.2(9) . . ?  
O149 W33 O126 153.5(9) . . ?  
O133 W33 O132 98.2(10) . . ?  
O119 W33 O132 161.3(9) . . ?  
O149 W33 O132 88.5(9) . . ?  
O126 W33 O132 83.8(9) . . ?  
O133 W33 O142 167.8(10) . . ?  
O119 W33 O142 90.5(9) . . ?  
O149 W33 O142 73.0(9) . . ?  
O126 W33 O142 80.6(9) . . ?  
O132 W33 O142 71.3(9) . . ?  
O133 W33 Cs7 50.2(8) . 1\_545 ?  
O119 W33 Cs7 51.4(6) . 1\_545 ?  
O149 W33 Cs7 89.9(6) . 1\_545 ?  
O126 W33 Cs7 110.1(6) . 1\_545 ?  
O132 W33 Cs7 147.3(6) . 1\_545 ?  
O142 W33 Cs7 138.7(6) . 1\_545 ?  
O131 W34 O148 102.0(10) . . ?  
O131 W34 O132 98.5(10) . . ?  
O148 W34 O132 88.6(9) . . ?  
O131 W34 O130 103.2(10) . . ?  
O148 W34 O130 88.3(10) . . ?  
O132 W34 O130 158.2(10) . . ?  
O131 W34 O127 101.0(10) . . ?  
O148 W34 O127 157.0(9) . . ?  
O132 W34 O127 89.4(9) . . ?  
O130 W34 O127 85.2(9) . . ?  
O131 W34 O142 170.5(10) . . ?  
O148 W34 O142 72.2(10) . . ?  
O132 W34 O142 74.2(9) . . ?

O130 W34 O142 84.3 (9) . . ?  
O127 W34 O142 85.2 (9) . . ?  
O131 W34 Cs3 39.1 (8) . . ?  
O148 W34 Cs3 138.3 (7) . . ?  
O132 W34 Cs3 85.2 (6) . . ?  
O130 W34 Cs3 111.0 (7) . . ?  
O127 W34 Cs3 64.2 (6) . . ?  
O142 W34 Cs3 143.3 (7) . . ?  
O129 W35 O128 101.4 (9) . . ?  
O129 W35 O130 102.5 (10) . . ?  
O128 W35 O130 88.3 (9) . . ?  
O129 W35 O140 101.3 (9) . . ?  
O128 W35 O140 93.9 (9) . . ?  
O130 W35 O140 155.2 (9) . . ?  
O129 W35 O147 95.5 (9) . . ?  
O128 W35 O147 162.8 (8) . . ?  
O130 W35 O147 85.3 (10) . . ?  
O140 W35 O147 85.5 (9) . . ?  
O129 W35 O141 165.9 (9) . . ?  
O128 W35 O141 92.0 (8) . . ?  
O130 W35 O141 82.0 (9) . . ?  
O140 W35 O141 73.3 (8) . . ?  
O147 W35 O141 71.3 (8) . . ?  
O129 W35 Cs1 51.5 (7) . . ?  
O128 W35 Cs1 118.2 (6) . . ?  
O130 W35 Cs1 144.1 (7) . . ?  
O140 W35 Cs1 53.4 (6) . . ?  
O147 W35 Cs1 74.9 (6) . . ?  
O141 W35 Cs1 118.0 (5) . . ?  
O139 W36 O123 103.8 (10) . . ?  
O139 W36 O138 100.1 (10) . . ?  
O123 W36 O138 93.3 (9) . . ?  
O139 W36 O140 98.0 (9) . . ?  
O123 W36 O140 94.6 (9) . . ?  
O138 W36 O140 157.9 (9) . . ?  
O139 W36 O146 96.4 (10) . . ?  
O123 W36 O146 159.7 (9) . . ?  
O138 W36 O146 81.7 (9) . . ?  
O140 W36 O146 83.8 (9) . . ?  
O139 W36 O141 165.7 (10) . . ?  
O123 W36 O141 89.4 (9) . . ?  
O138 W36 O141 84.3 (9) . . ?  
O140 W36 O141 75.2 (8) . . ?  
O146 W36 O141 70.6 (8) . . ?  
O137 W37 O124 102.5 (11) . . ?  
O137 W37 O138 100.8 (10) . . ?  
O124 W37 O138 91.4 (10) . . ?  
O137 W37 O136 97.2 (10) . . ?  
O124 W37 O136 96.1 (10) . . ?  
O138 W37 O136 158.5 (10) . . ?  
O137 W37 O145 94.9 (10) . . ?  
O124 W37 O145 162.5 (10) . . ?  
O138 W37 O145 83.1 (9) . . ?  
O136 W37 O145 83.7 (9) . . ?  
O137 W37 O143 164.5 (10) . . ?  
O124 W37 O143 90.8 (9) . . ?  
O138 W37 O143 86.6 (9) . . ?  
O136 W37 O143 73.3 (8) . . ?  
O145 W37 O143 72.3 (9) . . ?  
O155 W38 O145 103.0 (12) . . ?  
O155 W38 O144 100.1 (11) . . ?  
O145 W38 O144 91.1 (10) . . ?  
O155 W38 O151 100.1 (11) . . ?  
O145 W38 O151 90.0 (10) . . ?



O144 W38 O151 159.0(10) . . ?  
O155 W38 O150 101.6(12) . . ?  
O145 W38 O150 155.2(10) . . ?  
O144 W38 O150 87.5(10) . . ?  
O151 W38 O150 82.8(10) . . ?  
O155 W38 O143 171.2(10) . . ?  
O145 W38 O143 72.3(9) . . ?  
O144 W38 O143 72.9(9) . . ?  
O151 W38 O143 87.4(9) . . ?  
O150 W38 O143 83.7(9) . . ?  
O154 W39 O146 103.7(11) . . ?  
O154 W39 O151 100.8(10) . . ?  
O146 W39 O151 90.0(10) . . ?  
O154 W39 O147 99.8(10) . . ?  
O146 W39 O147 93.2(9) . . ?  
O151 W39 O147 157.8(10) . . ?  
O154 W39 O152 100.0(11) . . ?  
O146 W39 O152 156.2(10) . . ?  
O151 W39 O152 83.5(10) . . ?  
O147 W39 O152 84.9(9) . . ?  
O154 W39 O141 172.6(9) . . ?  
O146 W39 O141 72.9(9) . . ?  
O151 W39 O141 85.9(9) . . ?  
O147 W39 O141 74.1(8) . . ?  
O152 W39 O141 83.9(9) . . ?  
O153 W40 O150 106.5(11) . . ?  
O153 W40 O152 102.7(11) . . ?  
O150 W40 O152 90.1(10) . . ?  
O153 W40 O148 97.2(11) . . ?  
O150 W40 O148 155.3(10) . . ?  
O152 W40 O148 91.3(10) . . ?  
O153 W40 O149 98.0(11) . . ?  
O150 W40 O149 87.7(9) . . ?  
O152 W40 O149 158.9(10) . . ?  
O148 W40 O149 82.2(9) . . ?  
O153 W40 O142 165.5(11) . . ?  
O150 W40 O142 84.9(10) . . ?  
O152 W40 O142 85.8(10) . . ?  
O148 W40 O142 70.6(9) . . ?  
O149 W40 O142 73.1(9) . . ?  
O115 W41 O118 102.0(9) . . ?  
O115 W41 O127 94.3(9) . . ?  
O118 W41 O127 102.0(9) . . ?  
O115 W41 O194 98.8(9) . . ?  
O118 W41 O194 91.6(9) . . ?  
O127 W41 O194 158.7(8) . . ?  
O115 W41 O192 94.9(8) . . ?  
O118 W41 O192 160.2(8) . . ?  
O127 W41 O192 86.8(8) . . ?  
O194 W41 O192 75.5(8) . . ?  
O115 W41 O128 169.8(9) . . ?  
O118 W41 O128 85.8(8) . . ?  
O127 W41 O128 77.6(7) . . ?  
O194 W41 O128 87.3(8) . . ?  
O192 W41 O128 78.7(7) . . ?  
O115 W41 Gd5 94.0(6) . . ?  
O118 W41 Gd5 128.2(7) . . ?  
O127 W41 Gd5 125.7(5) . . ?  
O194 W41 Gd5 37.0(6) . . ?  
O192 W41 Gd5 39.0(6) . . ?  
O128 W41 Gd5 86.0(5) . . ?  
O115 W41 Cs3 54.2(7) . . ?  
O118 W41 Cs3 151.5(7) . . ?  
O127 W41 Cs3 68.3(6) . . ?

O194 W41 Cs3 106.4(6) . . ?  
O192 W41 Cs3 48.4(5) . . ?  
O128 W41 Cs3 116.3(5) . . ?  
Gd5 W41 Cs3 74.03(5) . . ?  
O159 W42 O158 104.2(10) . . ?  
O159 W42 O160 92.1(10) . . ?  
O158 W42 O160 103.5(9) . . ?  
O159 W42 O173 92.4(9) . . ?  
O158 W42 O173 91.7(9) . . ?  
O160 W42 O173 162.5(9) . . ?  
O159 W42 O178 165.3(9) . . ?  
O158 W42 O178 90.2(9) . . ?  
O160 W42 O178 87.1(9) . . ?  
O173 W42 O178 84.3(8) . . ?  
O159 W42 O176 90.2(9) . . ?  
O158 W42 O176 159.5(9) . . ?  
O160 W42 O176 90.2(9) . . ?  
O173 W42 O176 72.9(8) . . ?  
O178 W42 O176 75.1(8) . . ?  
O161 W43 O113 104.6(10) . . ?  
O161 W43 O162 95.9(9) . . ?  
O113 W43 O162 96.1(10) . . ?  
O161 W43 O160 91.5(10) . . ?  
O113 W43 O160 100.1(10) . . ?  
O162 W43 O160 159.8(9) . . ?  
O161 W43 O179 158.8(9) . . ?  
O113 W43 O179 96.4(9) . . ?  
O162 W43 O179 83.7(9) . . ?  
O160 W43 O179 82.7(9) . . ?  
O161 W43 O175 87.2(9) . . ?  
O113 W43 O175 166.5(9) . . ?  
O162 W43 O175 75.8(8) . . ?  
O160 W43 O175 85.9(9) . . ?  
O179 W43 O175 72.2(8) . . ?  
O161 W43 Cs2 127.7(7) . . ?  
O113 W43 Cs2 51.2(8) . . ?  
O162 W43 Cs2 128.1(6) . . ?  
O160 W43 Cs2 57.6(6) . . ?  
O179 W43 Cs2 65.3(6) . . ?  
O175 W43 Cs2 125.9(6) . . ?  
O161 W43 Cs3 56.6(7) . . ?  
O113 W43 Cs3 81.9(8) . . ?  
O162 W43 Cs3 47.5(6) . . ?  
O160 W43 Cs3 146.9(7) . . ?  
O179 W43 Cs3 130.2(6) . . ?  
O175 W43 Cs3 99.7(6) . . ?  
Cs2 W43 Cs3 133.12(6) . . ?  
O164 W44 O163 103.0(10) . . ?  
O164 W44 O165 100.2(10) . . ?  
O163 W44 O165 91.7(10) . . ?  
O164 W44 O162 101.7(9) . . ?  
O163 W44 O162 90.4(9) . . ?  
O165 W44 O162 157.0(10) . . ?  
O164 W44 O180 94.7(9) . . ?  
O163 W44 O180 162.2(9) . . ?  
O165 W44 O180 87.5(9) . . ?  
O162 W44 O180 83.7(8) . . ?  
O164 W44 O175 164.9(9) . . ?  
O163 W44 O175 91.0(9) . . ?  
O165 W44 O175 85.0(9) . . ?  
O162 W44 O175 72.1(8) . . ?  
O180 W44 O175 71.2(8) . . ?  
O164 W44 Cs3 82.8(6) . . ?  
O163 W44 Cs3 47.3(7) . . ?

O165 W44 Cs3 137.6(8) . . ?  
O162 W44 Cs3 53.2(6) . . ?  
O180 W44 Cs3 134.7(5) . . ?  
O175 W44 Cs3 103.1(5) . . ?  
O167 W45 O166 103.2(11) . . ?  
O167 W45 O165 101.0(11) . . ?  
O166 W45 O165 86.8(9) . . ?  
O167 W45 O168 99.1(11) . . ?  
O166 W45 O168 90.6(9) . . ?  
O165 W45 O168 159.8(10) . . ?  
O167 W45 O181 100.1(11) . . ?  
O166 W45 O181 156.5(10) . . ?  
O165 W45 O181 85.6(10) . . ?  
O168 W45 O181 88.9(9) . . ?  
O167 W45 O174 169.4(10) . . ?  
O166 W45 O174 85.8(8) . . ?  
O165 W45 O174 84.9(9) . . ?  
O168 W45 O174 74.9(8) . . ?  
O181 W45 O174 71.3(9) . . ?  
O373 W46 O170 101.3(12) . . ?  
O373 W46 O182 100.0(11) . . ?  
O170 W46 O182 89.9(10) . . ?  
O373 W46 O196 103.1(11) . . ?  
O170 W46 O196 86.7(10) . . ?  
O182 W46 O196 156.9(9) . . ?  
O373 W46 O168 96.0(11) . . ?  
O170 W46 O168 162.6(9) . . ?  
O182 W46 O168 88.7(10) . . ?  
O196 W46 O168 87.8(9) . . ?  
O373 W46 O174 168.7(11) . . ?  
O170 W46 O174 87.9(9) . . ?  
O182 W46 O174 73.3(8) . . ?  
O196 W46 O174 83.7(8) . . ?  
O168 W46 O174 75.1(8) . . ?  
O172 W47 O171 102.1(12) . . ?  
O172 W47 O173 103.8(11) . . ?  
O171 W47 O173 95.8(9) . . ?  
O172 W47 O170 105.8(11) . . ?  
O171 W47 O170 85.6(9) . . ?  
O173 W47 O170 149.3(8) . . ?  
O172 W47 O177 94.6(12) . . ?  
O171 W47 O177 161.2(9) . . ?  
O173 W47 O177 88.2(8) . . ?  
O170 W47 O177 81.7(9) . . ?  
O172 W47 O176 164.3(11) . . ?  
O171 W47 O176 92.1(8) . . ?  
O173 W47 O176 67.8(8) . . ?  
O170 W47 O176 81.5(8) . . ?  
O177 W47 O176 72.4(8) . . ?  
O188 W48 O178 103.4(11) . . ?  
O188 W48 O177 101.1(10) . . ?  
O178 W48 O177 92.2(9) . . ?  
O188 W48 O184 102.3(10) . . ?  
O178 W48 O184 88.5(8) . . ?  
O177 W48 O184 155.7(9) . . ?  
O188 W48 O185 100.9(11) . . ?  
O178 W48 O185 155.5(10) . . ?  
O177 W48 O185 85.9(9) . . ?  
O184 W48 O185 83.5(9) . . ?  
O188 W48 O176 171.3(10) . . ?  
O178 W48 O176 71.0(8) . . ?  
O177 W48 O176 72.9(8) . . ?  
O184 W48 O176 84.5(8) . . ?  
O185 W48 O176 85.1(9) . . ?

O187 W49 O179 101.1(10) . . ?  
O187 W49 O180 101.1(9) . . ?  
O179 W49 O180 91.4(9) . . ?  
O187 W49 O184 101.7(9) . . ?  
O179 W49 O184 93.1(9) . . ?  
O180 W49 O184 155.4(8) . . ?  
O187 W49 O183 102.5(9) . . ?  
O179 W49 O183 156.4(9) . . ?  
O180 W49 O183 84.0(9) . . ?  
O184 W49 O183 82.2(8) . . ?  
O187 W49 O175 172.2(9) . . ?  
O179 W49 O175 73.9(9) . . ?  
O180 W49 O175 73.4(8) . . ?  
O184 W49 O175 84.7(8) . . ?  
O183 W49 O175 82.6(8) . . ?  
O186 W50 O183 103.6(11) . . ?  
O186 W50 O185 102.7(12) . . ?  
O183 W50 O185 91.3(10) . . ?  
O186 W50 O181 98.8(12) . . ?  
O183 W50 O181 91.2(10) . . ?  
O185 W50 O181 157.1(10) . . ?  
O186 W50 O182 98.9(11) . . ?  
O183 W50 O182 157.3(10) . . ?  
O185 W50 O182 86.2(10) . . ?  
O181 W50 O182 82.9(9) . . ?  
O186 W50 O174 168.6(11) . . ?  
O183 W50 O174 85.6(9) . . ?  
O185 W50 O174 83.4(9) . . ?  
O181 W50 O174 74.0(9) . . ?  
O182 W50 O174 71.8(8) . . ?  
O193 W51 O195 99.1(9) . . ?  
O193 W51 O197 96.2(9) . . ?  
O195 W51 O197 101.5(9) . . ?  
O193 W51 O196 101.0(9) . . ?  
O195 W51 O196 97.1(9) . . ?  
O197 W51 O196 152.3(9) . . ?  
O193 W51 O198 173.1(9) . . ?  
O195 W51 O198 87.3(9) . . ?  
O197 W51 O198 79.9(8) . . ?  
O196 W51 O198 80.7(8) . . ?  
O193 W51 O171 85.3(9) . . ?  
O195 W51 O171 173.4(8) . . ?  
O197 W51 O171 82.8(9) . . ?  
O196 W51 O171 77.1(9) . . ?  
O198 W51 O171 88.6(8) . . ?  
O199 W52 O198 102.8(11) . . ?  
O199 W52 O134 103.7(12) . . ?  
O198 W52 O134 86.9(9) . . ?  
O199 W52 O200 100.4(11) . . ?  
O198 W52 O200 94.1(9) . . ?  
O134 W52 O200 155.0(10) . . ?  
O199 W52 O220 96.4(11) . . ?  
O198 W52 O220 160.5(10) . . ?  
O134 W52 O220 85.6(10) . . ?  
O200 W52 O220 85.3(10) . . ?  
O199 W52 O215 166.0(10) . . ?  
O198 W52 O215 89.7(9) . . ?  
O134 W52 O215 82.8(9) . . ?  
O200 W52 O215 72.3(9) . . ?  
O220 W52 O215 71.5(9) . . ?  
O213 W53 O134 98.6(12) . . ?  
O213 W53 O212 99.6(11) . . ?  
O134 W53 O212 161.8(11) . . ?  
O213 W53 O219 101.7(11) . . ?

O134 W53 O219 89.5(10) . . ?  
O212 W53 O219 87.1(10) . . ?  
O213 W53 O197 105.9(11) . . ?  
O134 W53 O197 85.2(9) . . ?  
O212 W53 O197 89.5(9) . . ?  
O219 W53 O197 152.4(10) . . ?  
O213 W53 O214 170.8(10) . . ?  
O134 W53 O214 89.9(10) . . ?  
O212 W53 O214 71.9(9) . . ?  
O219 W53 O214 74.7(9) . . ?  
O197 W53 O214 78.2(9) . . ?  
O210 W54 O211 103.0(11) . . ?  
O210 W54 O212 98.4(12) . . ?  
O211 W54 O212 90.8(10) . . ?  
O210 W54 O209 102.1(12) . . ?  
O211 W54 O209 94.4(10) . . ?  
O212 W54 O209 157.1(9) . . ?  
O210 W54 O218 93.4(11) . . ?  
O211 W54 O218 163.2(9) . . ?  
O212 W54 O218 83.3(10) . . ?  
O209 W54 O218 85.3(10) . . ?  
O210 W54 O214 162.9(11) . . ?  
O211 W54 O214 91.7(9) . . ?  
O212 W54 O214 72.3(9) . . ?  
O209 W54 O214 85.2(9) . . ?  
O218 W54 O214 71.5(8) . . ?  
O210 W54 K4 52.2(9) . . ?  
O211 W54 K4 154.0(7) . . ?  
O212 W54 K4 99.7(7) . . ?  
O209 W54 K4 85.1(7) . . ?  
O218 W54 K4 42.7(6) . . ?  
O214 W54 K4 114.1(6) . . ?  
O210 W54 Cs1 52.2(10) . . ?  
O211 W54 Cs1 75.2(7) . . ?  
O212 W54 Cs1 141.3(7) . . ?  
O209 W54 Cs1 61.4(7) . . ?  
O218 W54 Cs1 118.7(7) . . ?  
O214 W54 Cs1 142.3(6) . . ?  
K4 W54 Cs1 81.98(16) . . ?  
O207 W55 O208 102.6(12) . . ?  
O207 W55 O209 100.1(12) . . ?  
O208 W55 O209 95.7(11) . . ?  
O207 W55 O206 100.7(12) . . ?  
O208 W55 O206 91.6(11) . . ?  
O209 W55 O206 155.8(10) . . ?  
O207 W55 O217 98.7(11) . . ?  
O208 W55 O217 158.5(10) . . ?  
O209 W55 O217 82.4(9) . . ?  
O206 W55 O217 82.4(10) . . ?  
O207 W55 O216 165.9(10) . . ?  
O208 W55 O216 89.5(9) . . ?  
O209 W55 O216 85.5(9) . . ?  
O206 W55 O216 71.5(9) . . ?  
O217 W55 O216 69.0(8) . . ?  
O207 W55 Cs1 53.8(9) . . ?  
O208 W55 Cs1 75.3(8) . . ?  
O209 W55 Cs1 58.2(7) . . ?  
O206 W55 Cs1 145.9(7) . . ?  
O217 W55 Cs1 120.2(6) . . ?  
O216 W55 Cs1 138.0(6) . . ?  
O205 W56 O204 102.4(12) . . ?  
O205 W56 O203 101.7(12) . . ?  
O204 W56 O203 89.0(10) . . ?  
O205 W56 O206 99.1(12) . . ?

O204 W56 O206 96.9(10) . . ?  
O203 W56 O206 156.5(11) . . ?  
O205 W56 O222 96.6(13) . . ?  
O204 W56 O222 160.8(13) . . ?  
O203 W56 O222 85.2(12) . . ?  
O206 W56 O222 81.8(12) . . ?  
O205 W56 O216 167.8(11) . . ?  
O204 W56 O216 88.1(9) . . ?  
O203 W56 O216 84.5(9) . . ?  
O206 W56 O216 73.1(10) . . ?  
O222 W56 O216 73.2(11) . . ?  
O202 W57 O201 103.2(12) . . ?  
O202 W57 O203 104.1(12) . . ?  
O201 W57 O203 90.7(11) . . ?  
O202 W57 O200 95.6(12) . . ?  
O201 W57 O200 92.2(10) . . ?  
O203 W57 O200 158.9(10) . . ?  
O202 W57 O221 95.9(11) . . ?  
O201 W57 O221 160.7(11) . . ?  
O203 W57 O221 87.0(10) . . ?  
O200 W57 O221 83.3(10) . . ?  
O202 W57 O215 165.0(11) . . ?  
O201 W57 O215 89.1(10) . . ?  
O203 W57 O215 84.1(10) . . ?  
O200 W57 O215 75.0(9) . . ?  
O221 W57 O215 71.6(9) . . ?  
O227 W58 O220 99.5(13) . . ?  
O227 W58 O221 100.5(12) . . ?  
O220 W58 O221 88.9(11) . . ?  
O227 W58 O223 101.0(12) . . ?  
O220 W58 O223 159.3(10) . . ?  
O221 W58 O223 90.3(11) . . ?  
O227 W58 O224 102.2(12) . . ?  
O220 W58 O224 89.5(11) . . ?  
O221 W58 O224 157.1(10) . . ?  
O223 W58 O224 83.3(11) . . ?  
O227 W58 O215 170.6(11) . . ?  
O220 W58 O215 75.4(10) . . ?  
O221 W58 O215 71.8(9) . . ?  
O223 W58 O215 84.7(9) . . ?  
O224 W58 O215 85.7(9) . . ?  
O226 W59 O224 100.2(12) . . ?  
O226 W59 O225 102.7(12) . . ?  
O224 W59 O225 86.5(11) . . ?  
O226 W59 O218 99.2(11) . . ?  
O224 W59 O218 159.5(10) . . ?  
O225 W59 O218 95.7(10) . . ?  
O226 W59 O219 96.9(12) . . ?  
O224 W59 O219 84.8(11) . . ?  
O225 W59 O219 159.7(10) . . ?  
O218 W59 O219 86.4(10) . . ?  
O226 W59 O214 168.4(11) . . ?  
O224 W59 O214 85.7(10) . . ?  
O225 W59 O214 87.6(10) . . ?  
O218 W59 O214 74.1(9) . . ?  
O219 W59 O214 73.5(9) . . ?  
O228 W60 O217 103.0(12) . . ?  
O228 W60 O223 101.0(12) . . ?  
O217 W60 O223 154.2(11) . . ?  
O228 W60 O222 101.7(14) . . ?  
O217 W60 O222 93.8(12) . . ?  
O223 W60 O222 90.4(13) . . ?  
O228 W60 O225 99.2(12) . . ?  
O217 W60 O225 86.5(10) . . ?

O223 W60 O225 80.4 (11) . . ?  
O222 W60 O225 158.5 (12) . . ?  
O228 W60 O216 172.9 (11) . . ?  
O217 W60 O216 71.9 (9) . . ?  
O223 W60 O216 84.9 (9) . . ?  
O222 W60 O216 74.1 (11) . . ?  
O225 W60 O216 85.7 (9) . . ?  
O190 W61 O169 103.7 (9) . . ?  
O190 W61 O307 95.8 (9) . . ?  
O169 W61 O307 96.6 (9) . . ?  
O190 W61 O166 103.4 (9) . . ?  
O169 W61 O166 89.3 (9) . . ?  
O307 W61 O166 158.0 (8) . . ?  
O190 W61 O308 161.3 (8) . . ?  
O169 W61 O308 92.4 (9) . . ?  
O307 W61 O308 72.6 (9) . . ?  
O166 W61 O308 86.0 (9) . . ?  
O190 W61 O163 86.1 (9) . . ?  
O169 W61 O163 165.4 (9) . . ?  
O307 W61 O163 93.1 (8) . . ?  
O166 W61 O163 77.8 (8) . . ?  
O308 W61 O163 80.0 (9) . . ?  
O190 W61 K3 151.6 (6) . 2\_546 ?  
O169 W61 K3 49.4 (7) . 2\_546 ?  
O307 W61 K3 96.5 (6) . 2\_546 ?  
O166 W61 K3 71.4 (6) . 2\_546 ?  
O308 W61 K3 46.8 (6) . 2\_546 ?  
O163 W61 K3 118.6 (6) . 2\_546 ?  
O190 W61 Cs3 71.0 (6) . . ?  
O169 W61 Cs3 145.1 (6) . . ?  
O307 W61 Cs3 51.5 (6) . . ?  
O166 W61 Cs3 125.6 (6) . . ?  
O308 W61 Cs3 90.4 (6) . . ?  
O163 W61 Cs3 48.2 (6) . . ?  
K3 W61 Cs3 135.42 (15) 2\_546 . ?  
O306 W62 O262 103.5 (11) . . ?  
O306 W62 O233 93.7 (10) . . ?  
O262 W62 O233 101.9 (11) . . ?  
O306 W62 O308 103.2 (10) . . ?  
O262 W62 O308 91.9 (10) . . ?  
O233 W62 O308 155.1 (9) . . ?  
O306 W62 O307 90.9 (9) . . ?  
O262 W62 O307 161.2 (9) . . ?  
O233 W62 O307 89.0 (9) . . ?  
O308 W62 O307 72.8 (9) . . ?  
O306 W62 O234 170.8 (9) . . ?  
O262 W62 O234 83.5 (10) . . ?  
O233 W62 O234 78.8 (9) . . ?  
O308 W62 O234 82.3 (9) . . ?  
O307 W62 O234 83.6 (8) . . ?  
O306 W62 K3 143.1 (8) . 2\_546 ?  
O262 W62 K3 70.7 (8) . 2\_546 ?  
O233 W62 K3 123.2 (6) . 2\_546 ?  
O308 W62 K3 42.8 (7) . 2\_546 ?  
O307 W62 K3 90.5 (5) . 2\_546 ?  
O234 W62 K3 44.7 (6) . 2\_546 ?  
O306 W62 Cs3 43.5 (8) . . ?  
O262 W62 Cs3 145.0 (8) . . ?  
O233 W62 Cs3 93.0 (6) . . ?  
O308 W62 Cs3 87.1 (7) . . ?  
O307 W62 Cs3 47.5 (5) . . ?  
O234 W62 Cs3 130.8 (6) . . ?  
K3 W62 Cs3 125.86 (15) 2\_546 . ?  
O248 W63 O254 99.7 (12) . . ?

O248 W63 O309 100.3(11) . . ?  
O254 W63 O309 85.3(10) . . ?  
O248 W63 O233 101.3(11) . . ?  
O254 W63 O233 158.7(10) . . ?  
O309 W63 O233 87.5(9) . . ?  
O248 W63 O247 101.0(11) . . ?  
O254 W63 O247 92.3(11) . . ?  
O309 W63 O247 158.7(10) . . ?  
O233 W63 O247 87.1(10) . . ?  
O248 W63 O363 169.5(10) . . ?  
O254 W63 O363 72.3(10) . . ?  
O309 W63 O363 86.2(9) . . ?  
O233 W63 O363 87.2(9) . . ?  
O247 W63 O363 73.0(9) . . ?  
O248 W63 Cs6 47.4(8) . . ?  
O254 W63 Cs6 78.3(8) . . ?  
O309 W63 Cs6 56.8(7) . . ?  
O233 W63 Cs6 114.0(7) . . ?  
O247 W63 Cs6 143.3(7) . . ?  
O363 W63 Cs6 134.3(6) . . ?  
O231 W64 O234 103.2(10) . . ?  
O231 W64 O235 98.3(10) . . ?  
O234 W64 O235 92.4(10) . . ?  
O231 W64 O309 103.8(10) . . ?  
O234 W64 O309 89.4(10) . . ?  
O235 W64 O309 156.8(10) . . ?  
O231 W64 O249 91.9(10) . . ?  
O234 W64 O249 164.9(10) . . ?  
O235 W64 O249 85.4(10) . . ?  
O309 W64 O249 86.9(9) . . ?  
O231 W64 O361 162.2(9) . . ?  
O234 W64 O361 91.8(9) . . ?  
O235 W64 O361 71.3(9) . . ?  
O309 W64 O361 85.6(9) . . ?  
O249 W64 O361 73.3(9) . . ?  
O231 W64 K3 82.2(7) . 2\_546 ?  
O234 W64 K3 47.0(7) . 2\_546 ?  
O235 W64 K3 54.3(8) . 2\_546 ?  
O309 W64 K3 135.5(7) . 2\_546 ?  
O249 W64 K3 137.4(7) . 2\_546 ?  
O361 W64 K3 101.8(6) . 2\_546 ?  
O236 W65 O237 104.9(10) . . ?  
O236 W65 O238 92.4(10) . . ?  
O237 W65 O238 100.9(10) . . ?  
O236 W65 O235 94.8(10) . . ?  
O237 W65 O235 98.5(10) . . ?  
O238 W65 O235 156.8(10) . . ?  
O236 W65 O250 161.1(9) . . ?  
O237 W65 O250 94.0(10) . . ?  
O238 W65 O250 82.7(10) . . ?  
O235 W65 O250 83.4(10) . . ?  
O236 W65 O361 88.3(9) . . ?  
O237 W65 O361 165.2(9) . . ?  
O238 W65 O361 84.9(9) . . ?  
O235 W65 O361 73.3(9) . . ?  
O250 W65 O361 73.1(9) . . ?  
O236 W65 K3 54.8(7) . 2\_546 ?  
O237 W65 K3 87.5(7) . 2\_546 ?  
O238 W65 K3 147.1(7) . 2\_546 ?  
O235 W65 K3 46.0(7) . 2\_546 ?  
O250 W65 K3 128.8(7) . 2\_546 ?  
O361 W65 K3 94.9(6) . 2\_546 ?  
O240 W66 O239 103.9(11) . . ?  
O240 W66 O241 96.6(10) . . ?



O239 W66 O241 96.5 (10) . . ?  
O240 W66 O238 101.6 (10) . . ?  
O239 W66 O238 91.0 (10) . . ?  
O241 W66 O238 158.1 (10) . . ?  
O240 W66 O251 93.9 (11) . . ?  
O239 W66 O251 162.0 (10) . . ?  
O241 W66 O251 83.9 (10) . . ?  
O238 W66 O251 82.7 (10) . . ?  
O240 W66 O362 163.5 (11) . . ?  
O239 W66 O362 91.3 (10) . . ?  
O241 W66 O362 75.0 (9) . . ?  
O238 W66 O362 84.3 (9) . . ?  
O251 W66 O362 71.4 (9) . . ?  
O243 W67 O242 102.3 (13) . . ?  
O243 W67 O244 103.0 (13) . . ?  
O242 W67 O244 88.0 (12) . . ?  
O243 W67 O241 105.6 (12) . . ?  
O242 W67 O241 94.3 (11) . . ?  
O244 W67 O241 150.1 (11) . . ?  
O243 W67 O252 96.2 (13) . . ?  
O242 W67 O252 160.4 (12) . . ?  
O244 W67 O252 81.6 (12) . . ?  
O241 W67 O252 86.8 (11) . . ?  
O243 W67 O362 164.8 (11) . . ?  
O242 W67 O362 92.6 (10) . . ?  
O244 W67 O362 80.1 (10) . . ?  
O241 W67 O362 70.0 (9) . . ?  
O252 W67 O362 69.3 (11) . . ?  
O246 W68 O247 97.6 (13) . . ?  
O246 W68 O253 101.9 (13) . . ?  
O247 W68 O253 90.5 (11) . . ?  
O246 W68 O244 101.5 (13) . . ?  
O247 W68 O244 160.9 (11) . . ?  
O253 W68 O244 87.4 (12) . . ?  
O246 W68 O245 104.7 (13) . . ?  
O247 W68 O245 86.8 (11) . . ?  
O253 W68 O245 153.4 (11) . . ?  
O244 W68 O245 86.6 (12) . . ?  
O246 W68 O363 169.6 (12) . . ?  
O247 W68 O363 73.9 (9) . . ?  
O253 W68 O363 72.8 (10) . . ?  
O244 W68 O363 87.4 (10) . . ?  
O245 W68 O363 81.0 (9) . . ?  
O260 W69 O255 100.2 (12) . . ?  
O260 W69 O257 102.2 (14) . . ?  
O255 W69 O257 89.1 (12) . . ?  
O260 W69 O253 99.1 (13) . . ?  
O255 W69 O253 160.6 (11) . . ?  
O257 W69 O253 88.2 (12) . . ?  
O260 W69 O254 100.3 (13) . . ?  
O255 W69 O254 88.7 (11) . . ?  
O257 W69 O254 157.5 (12) . . ?  
O253 W69 O254 86.4 (11) . . ?  
O260 W69 O363 169.5 (11) . . ?  
O255 W69 O363 87.1 (10) . . ?  
O257 W69 O363 85.3 (11) . . ?  
O253 W69 O363 73.6 (10) . . ?  
O254 W69 O363 72.1 (10) . . ?  
O258 W70 O251 102.7 (12) . . ?  
O258 W70 O252 101.7 (13) . . ?  
O251 W70 O252 93.1 (12) . . ?  
O258 W70 O257 99.9 (13) . . ?  
O251 W70 O257 157.1 (12) . . ?  
O252 W70 O257 86.3 (12) . . ?

O258 W70 O256 101.0 (12) . . ?  
O251 W70 O256 88.4 (11) . . ?  
O252 W70 O256 156.3 (13) . . ?  
O257 W70 O256 83.2 (11) . . ?  
O258 W70 O362 175.2 (11) . . ?  
O251 W70 O362 74.0 (10) . . ?  
O252 W70 O362 75.3 (12) . . ?  
O257 W70 O362 83.8 (11) . . ?  
O256 W70 O362 82.4 (10) . . ?  
O259 W71 O256 103.1 (12) . . ?  
O259 W71 O250 100.8 (11) . . ?  
O256 W71 O250 90.0 (11) . . ?  
O259 W71 O249 98.6 (11) . . ?  
O256 W71 O249 157.3 (11) . . ?  
O250 W71 O249 92.3 (10) . . ?  
O259 W71 O255 100.8 (11) . . ?  
O256 W71 O255 83.4 (11) . . ?  
O250 W71 O255 158.4 (10) . . ?  
O249 W71 O255 86.3 (10) . . ?  
O259 W71 O361 170.7 (10) . . ?  
O256 W71 O361 84.4 (10) . . ?  
O250 W71 O361 73.4 (9) . . ?  
O249 W71 O361 74.6 (9) . . ?  
O255 W71 O361 85.4 (9) . . ?  
O302 W72 O261 100.7 (11) . . ?  
O302 W72 O245 93.7 (11) . . ?  
O261 W72 O245 99.5 (11) . . ?  
O302 W72 O284 100.7 (11) . . ?  
O261 W72 O284 92.0 (10) . . ?  
O245 W72 O284 159.7 (11) . . ?  
O302 W72 O281 87.2 (10) . . ?  
O261 W72 O281 170.0 (11) . . ?  
O245 W72 O281 86.0 (10) . . ?  
O284 W72 O281 80.4 (10) . . ?  
O302 W72 O242 170.3 (11) . . ?  
O261 W72 O242 86.7 (11) . . ?  
O245 W72 O242 78.8 (11) . . ?  
O284 W72 O242 85.2 (10) . . ?  
O281 W72 O242 86.2 (10) . . ?  
O282 W73 O281 102.6 (13) . . ?  
O282 W73 O283 103.5 (13) . . ?  
O281 W73 O283 87.6 (12) . . ?  
O282 W73 O280 101.0 (12) . . ?  
O281 W73 O280 94.0 (10) . . ?  
O283 W73 O280 154.5 (12) . . ?  
O282 W73 O291 93.0 (12) . . ?  
O281 W73 O291 163.9 (11) . . ?  
O283 W73 O291 84.8 (11) . . ?  
O280 W73 O291 86.9 (9) . . ?  
O282 W73 O289 164.4 (11) . . ?  
O281 W73 O289 92.0 (10) . . ?  
O283 W73 O289 82.2 (11) . . ?  
O280 W73 O289 72.3 (8) . . ?  
O291 W73 O289 72.9 (9) . . ?  
O279 W74 O278 102.8 (11) . . ?  
O279 W74 O277 101.1 (11) . . ?  
O278 W74 O277 94.1 (10) . . ?  
O279 W74 O280 97.4 (11) . . ?  
O278 W74 O280 92.6 (10) . . ?  
O277 W74 O280 158.3 (9) . . ?  
O279 W74 O290 96.8 (10) . . ?  
O278 W74 O290 160.3 (10) . . ?  
O277 W74 O290 84.0 (9) . . ?  
O280 W74 O290 82.8 (9) . . ?

O279 W74 O289 167.4 (10) . . ?  
O278 W74 O289 88.0 (9) . . ?  
O277 W74 O289 84.2 (8) . . ?  
O280 W74 O289 75.4 (9) . . ?  
O290 W74 O289 72.3 (8) . . ?  
O276 W75 O275 102.6 (12) . . ?  
O276 W75 O277 101.3 (11) . . ?  
O275 W75 O277 91.8 (11) . . ?  
O276 W75 O274 98.3 (11) . . ?  
O275 W75 O274 93.4 (11) . . ?  
O277 W75 O274 158.1 (10) . . ?  
O276 W75 O294 96.6 (11) . . ?  
O275 W75 O294 160.7 (11) . . ?  
O277 W75 O294 86.1 (9) . . ?  
O274 W75 O294 82.0 (10) . . ?  
O276 W75 O288 166.5 (10) . . ?  
O275 W75 O288 89.1 (10) . . ?  
O277 W75 O288 84.8 (9) . . ?  
O274 W75 O288 74.0 (9) . . ?  
O294 W75 O288 71.6 (9) . . ?  
O273 W76 O271 102.7 (13) . . ?  
O273 W76 O270 104.7 (12) . . ?  
O271 W76 O270 91.2 (12) . . ?  
O273 W76 O274 101.1 (12) . . ?  
O271 W76 O274 90.7 (12) . . ?  
O270 W76 O274 153.1 (11) . . ?  
O273 W76 O295 95.6 (11) . . ?  
O271 W76 O295 161.6 (12) . . ?  
O270 W76 O295 83.3 (10) . . ?  
O274 W76 O295 86.5 (9) . . ?  
O273 W76 O288 164.5 (10) . . ?  
O271 W76 O288 91.4 (11) . . ?  
O270 W76 O288 81.2 (9) . . ?  
O274 W76 O288 71.9 (9) . . ?  
O295 W76 O288 70.5 (8) . . ?  
O269 W77 O268 104.9 (12) . . ?  
O269 W77 O270 101.7 (13) . . ?  
O268 W77 O270 90.5 (11) . . ?  
O269 W77 O293 97.7 (13) . . ?  
O268 W77 O293 157.0 (11) . . ?  
O270 W77 O293 88.4 (12) . . ?  
O269 W77 O286 100.1 (13) . . ?  
O268 W77 O286 86.9 (12) . . ?  
O270 W77 O286 158.0 (11) . . ?  
O293 W77 O286 85.5 (12) . . ?  
O269 W77 O287 166.9 (12) . . ?  
O268 W77 O287 86.0 (10) . . ?  
O270 W77 O287 85.0 (10) . . ?  
O293 W77 O287 71.0 (10) . . ?  
O286 W77 O287 73.0 (10) . . ?  
O285 W78 O292 99.1 (13) . . ?  
O285 W78 O284 105.2 (13) . . ?  
O292 W78 O284 155.7 (11) . . ?  
O285 W78 O286 96.4 (14) . . ?  
O292 W78 O286 90.3 (12) . . ?  
O284 W78 O286 86.0 (12) . . ?  
O285 W78 O283 102.2 (14) . . ?  
O292 W78 O283 89.8 (11) . . ?  
O284 W78 O283 86.2 (11) . . ?  
O286 W78 O283 161.1 (13) . . ?  
O285 W78 O287 168.7 (12) . . ?  
O292 W78 O287 73.8 (10) . . ?  
O284 W78 O287 82.1 (10) . . ?  
O286 W78 O287 75.2 (11) . . ?

O283 W78 O287 86.7(11) . . ?  
O299 W79 O298 101.5(12) . . ?  
O299 W79 O297 101.7(12) . . ?  
O298 W79 O297 88.3(11) . . ?  
O299 W79 O293 100.5(13) . . ?  
O298 W79 O293 157.4(11) . . ?  
O297 W79 O293 92.2(11) . . ?  
O299 W79 O292 99.4(13) . . ?  
O298 W79 O292 88.7(11) . . ?  
O297 W79 O292 158.9(10) . . ?  
O293 W79 O292 82.8(11) . . ?  
O299 W79 O287 170.2(11) . . ?  
O298 W79 O287 84.3(10) . . ?  
O297 W79 O287 86.3(10) . . ?  
O293 W79 O287 73.2(10) . . ?  
O292 W79 O287 72.6(10) . . ?  
O301 W80 O290 103.1(12) . . ?  
O301 W80 O291 101.1(13) . . ?  
O290 W80 O291 89.8(10) . . ?  
O301 W80 O296 97.1(12) . . ?  
O290 W80 O296 92.4(11) . . ?  
O291 W80 O296 160.6(10) . . ?  
O301 W80 O298 99.8(12) . . ?  
O290 W80 O298 156.9(10) . . ?  
O291 W80 O298 88.0(11) . . ?  
O296 W80 O298 82.5(11) . . ?  
O301 W80 O289 174.8(11) . . ?  
O290 W80 O289 72.5(9) . . ?  
O291 W80 O289 76.4(9) . . ?  
O296 W80 O289 85.9(9) . . ?  
O298 W80 O289 84.7(9) . . ?  
O300 W81 O294 101.0(11) . . ?  
O300 W81 O295 100.1(11) . . ?  
O294 W81 O295 91.2(11) . . ?  
O300 W81 O296 98.9(11) . . ?  
O294 W81 O296 93.3(11) . . ?  
O295 W81 O296 159.3(10) . . ?  
O300 W81 O297 98.4(11) . . ?  
O294 W81 O297 160.5(10) . . ?  
O295 W81 O297 85.7(10) . . ?  
O296 W81 O297 83.3(10) . . ?  
O300 W81 O288 174.3(11) . . ?  
O294 W81 O288 75.5(9) . . ?  
O295 W81 O288 75.7(9) . . ?  
O296 W81 O288 85.9(9) . . ?  
O297 W81 O288 85.1(9) . . ?  
O272 W82 O265 108.4(11) . . ?  
O272 W82 O268 115.4(12) . . ?  
O265 W82 O268 95.7(11) . . ?  
O272 W82 O266 89(2) . . ?  
O265 W82 O266 96.0(19) . . ?  
O268 W82 O266 147.9(19) . . ?  
O272 W82 O271 81.0(12) . . ?  
O265 W82 O271 170.1(11) . . ?  
O268 W82 O271 82.6(11) . . ?  
O266 W82 O271 80.8(19) . . ?  
O272 W82 O267 150.9(19) . . ?  
O265 W82 O267 89.5(16) . . ?  
O268 W82 O267 84.2(17) . . ?  
O266 W82 O267 66(2) . . ?  
O271 W82 O267 80.6(17) . . ?  
O379 Na25 O50 77.3(9) . 1\_545 ?  
O189 Na24 O54 119.7(9) . . ?  
O189 Na24 Na1 69.3(6) . . ?

O54 Na24 Na1 79.6(6) . . ?  
O343 Na23 Na6 167.6(10) . . ?  
O291 Na22 O170 139.9(11) . 1\_545 ?  
O291 Na22 O177 100.2(10) . 1\_545 ?  
O170 Na22 O177 51.8(7) 1\_545 1\_545 ?  
O291 Na22 Na16 100.5(10) . . ?  
O170 Na22 Na16 61.4(8) 1\_545 . ?  
O177 Na22 Na16 95.9(9) 1\_545 . ?  
O291 Na22 Na6 77.7(8) . . ?  
O170 Na22 Na6 136.5(9) 1\_545 . ?  
O177 Na22 Na6 114.2(8) 1\_545 . ?  
Na16 Na22 Na6 149.8(9) . . ?  
O4 Na20 O290 122.5(11) . 1\_565 ?  
O4 Na20 O23 59.4(8) . . ?  
O290 Na20 O23 124.9(11) 1\_565 . ?  
O4 Na20 O374 149.8(15) . . ?  
O290 Na20 O374 64.5(12) 1\_565 . ?  
O23 Na20 O374 145.0(14) . . ?  
O4 Na20 O75 101.8(10) . . ?  
O290 Na20 O75 134.0(11) 1\_565 . ?  
O23 Na20 O75 66.1(8) . . ?  
O374 Na20 O75 83.9(13) . . ?  
O4 Na20 W4 27.6(5) . . ?  
O290 Na20 W4 137.3(10) 1\_565 . ?  
O23 Na20 W4 33.6(5) . . ?  
O374 Na20 W4 158.2(13) . . ?  
O75 Na20 W4 79.2(7) . . ?

\_diffn\_measured\_fraction\_theta\_max 0.994  
\_diffn\_reflns\_theta\_full 25.68  
\_diffn\_measured\_fraction\_theta\_full 0.994  
\_refine\_diff\_density\_max 5.537  
\_refine\_diff\_density\_min -7.204  
\_refine\_diff\_density\_rms 0.535

data\_fh88

```
_audit_creation_method          SHELXL-97
_chemical_name_systematic
;
?
;
_chemical_name_common           ?
_chemical_melting_point         ?
_chemical_formula_moiety        ?
_chemical_formula_sum
'As16 Cs10.60 K22 Na27.40 O759.40 Tb16 W163.20'
_chemical_formula_weight        48795.13

loop_
  _atom_type_symbol
  _atom_type_description
  _atom_type_scatter_dispersion_real
  _atom_type_scatter_dispersion_imag
  _atom_type_scatter_source
'O' 'O' 0.0106 0.0060
'International Tables Vol C Tables 4.2.6.8 and 6.1.1.4'
'Na' 'Na' 0.0362 0.0249
'International Tables Vol C Tables 4.2.6.8 and 6.1.1.4'
'K' 'K' 0.2009 0.2494
'International Tables Vol C Tables 4.2.6.8 and 6.1.1.4'
'As' 'As' 0.0499 2.0058
'International Tables Vol C Tables 4.2.6.8 and 6.1.1.4'
'Cs' 'Cs' -0.3680 2.1192
'International Tables Vol C Tables 4.2.6.8 and 6.1.1.4'
'Tb' 'Tb' -0.1723 4.1537
'International Tables Vol C Tables 4.2.6.8 and 6.1.1.4'
'W' 'W' -0.8490 6.8722
'International Tables Vol C Tables 4.2.6.8 and 6.1.1.4'

_symmetry_space_group_name_H-M 'P -1'
_symmetry_cell_setting triclinic

loop_
  _symmetry_equiv_pos_as_xyz
  'x, y, z'
  '-x, -y, -z'

_cell_length_a 20.6484(2)
_cell_length_b 23.0074(2)
_cell_length_c 44.3180(4)
_cell_angle_alpha 81.7120(10)
_cell_angle_beta 84.5870(10)
_cell_angle_gamma 83.0820(10)
_cell_volume 20618.8(3)
_cell_formula_units_Z 1
_cell_measurement_temperature 183(2)
_cell_measurement_reflns_used 78254
_cell_measurement_theta_min 2.2003
_cell_measurement_theta_max 29.3748

_exptl_crystal_description block
_exptl_crystal_colour colorless
_exptl_crystal_size_max 0.14
_exptl_crystal_size_mid 0.11
_exptl_crystal_size_min 0.04
_exptl_crystal_density_meas ?
_exptl_crystal_density_diffrn 3.930
```

```
_exptl_crystal_density_method      'not measured'
_exptl_crystal_F_000               21022
_exptl_absorpt_coefficient_mu      25.334
_exptl_absorpt_correction_type     'multi-scan'
_exptl_absorpt_correction_T_min    0.40506
_exptl_absorpt_correction_T_max    1.00000
_exptl_absorpt_process_details
;
CrysAlis RED, Oxford Diffraction Ltd.,
Version 1.171.32.24 (release 21-04-2008 CrysAlis171 .NET)
(compiled Apr 21 2008,18:23:10)
Empirical absorption correction using spherical harmonics,
implemented in SCALE3 ABSPACK scaling algorithm.
;
_exptl_special_details
;
?
;

_diffrn_ambient_temperature        183(2)
_diffrn_radiation_wavelength       0.71073
_diffrn_radiation_type             MoK\alpha
_diffrn_radiation_source           'fine-focus sealed tube'
_diffrn_radiation_monochromator     graphite
_diffrn_measurement_device_type     'Xcalibur Ruby'
_diffrn_measurement_method         '/o oscillation scan'
_diffrn_detector_area_resol_mean   10.4498
_diffrn_standards_number           ?
_diffrn_standards_interval_count   ?
_diffrn_standards_interval_time    ?
_diffrn_standards_decay_%          ?
_diffrn_reflns_number              596712
_diffrn_reflns_av_R_equivalents    0.1571
_diffrn_reflns_av_sigmaI/netI      0.1456
_diffrn_reflns_limit_h_min         -23
_diffrn_reflns_limit_h_max         23
_diffrn_reflns_limit_k_min         -26
_diffrn_reflns_limit_k_max         26
_diffrn_reflns_limit_l_min         -50
_diffrn_reflns_limit_l_max         50
_diffrn_reflns_theta_min           2.21
_diffrn_reflns_theta_max           24.11
_reflns_number_total               65545
_reflns_number_gt                   38095
_reflns_threshold_expression        >2sigma(I)

_computing_data_collection         'CrysAlis RED (Oxford, 2007)'
_computing_cell_refinement         'CrysAlis RED (Oxford, 2007)'
_computing_data_reduction         'CrysAlis RED (Oxford, 2007)'
_computing_structure_solution      'SHELXS-97 (Sheldrick, 1990)'
_computing_structure_refinement    'SHELXL-97 (Sheldrick, 1997)'
_computing_molecular_graphics      'ORTEP-3 (Farrugia, 1997)'
_computing_publication_material    'SHELXL-97 (Sheldrick, 2008)'

_refine_special_details
;
Refinement of F2 against ALL reflections. The weighted R-factor
wR and
goodness of fit S are based on F2, conventional R-factors R are
based
on F, with F set to zero for negative F2. The threshold expression
of
F2 > 2sigma(F2) is used only for calculating R-factors(gt) etc.
```

and is  
not relevant to the choice of reflections for refinement. R-factors based on  $F^2$  are statistically about twice as large as those based on F, and R-factors based on ALL data will be even larger.  
;

```
_refine_ls_structure_factor_coef  Fsqd
_refine_ls_matrix_type            full
_refine_ls_weighting_scheme       calc
_refine_ls_weighting_details      'calc w=1/[\s^2*(Fo^2)+(0.0903P)^2+2641.8191P] where P=(Fo^2+2Fc^2)/3'
_atom_sites_solution_primary      direct
_atom_sites_solution_secondary    difmap
_refine_ls_extinction_method      none
_refine_ls_extinction_coef        ?
_refine_ls_number_reflns         65545
_refine_ls_number_parameters      2652
_refine_ls_number_restraints     0
_refine_ls_R_factor_all          0.1688
_refine_ls_R_factor_gt           0.0985
_refine_ls_wR_factor_ref         0.2321
_refine_ls_wR_factor_gt         0.2044
_refine_ls_goodness_of_fit_ref   1.002
_refine_ls_restrained_S_all      1.002
_refine_ls_shift/su_max          0.001
_refine_ls_shift/su_mean         0.000
```

```
loop_
  _atom_site_label
  _atom_site_type_symbol
  _atom_site_fract_x
  _atom_site_fract_y
  _atom_site_fract_z
  _atom_site_U_iso_or_equiv
  _atom_site_adp_type
  _atom_site_occupancy
  _atom_site_symmetry_multiplicity
  _atom_site_calc_flag
  _atom_site_refinement_flags
  _atom_site_disorder_assembly
  _atom_site_disorder_group
O1 O 0.6656(17) 0.1829(16) 0.0774(8) 0.063(10) Uiso 1 1 d . . .
O2 O 0.7480(17) 0.0206(16) 0.1482(8) 0.064(10) Uiso 1 1 d . . .
O3 O 0.6012(15) 0.1861(15) 0.1862(7) 0.050(9) Uiso 1 1 d . . .
O4 O 0.4287(18) 0.0363(17) 0.2445(8) 0.065(10) Uiso 1 1 d . . .
O5 O 0.5806(17) -0.1281(16) 0.2142(8) 0.061(10) Uiso 1 1 d . . .
O6 O 0.6370(15) -0.1333(14) 0.0898(7) 0.044(8) Uiso 1 1 d . . .
O7 O 0.5567(14) 0.0349(13) 0.0158(6) 0.039(8) Uiso 1 1 d . . .
O8 O 0.4085(15) 0.2308(14) 0.0524(7) 0.050(9) Uiso 1 1 d . . .
O9 O 0.3456(16) 0.2240(15) 0.1626(7) 0.051(9) Uiso 1 1 d . . .
O10 O 0.6491(13) 0.0740(13) 0.1114(6) 0.034(7) Uiso 1 1 d . . .
O11 O 0.6220(14) 0.0755(13) 0.1683(6) 0.038(7) Uiso 1 1 d . . .
O12 O 0.5731(13) 0.1639(12) 0.1293(6) 0.033(7) Uiso 1 1 d . . .
O13 O 0.6037(14) 0.0999(13) 0.0554(6) 0.039(8) Uiso 1 1 d . . .
O14 O 0.6766(14) -0.0414(13) 0.1173(6) 0.039(8) Uiso 1 1 d . . .
O15 O 0.6453(15) -0.0412(14) 0.1780(7) 0.044(8) Uiso 1 1 d . . .
O16 O 0.5219(15) 0.1025(15) 0.2077(7) 0.050(9) Uiso 1 1 d . . .
O17 O 0.4749(16) 0.1932(15) 0.1682(7) 0.055(9) Uiso 1 1 d . . .
O18 O 0.5295(15) 0.1944(15) 0.0736(7) 0.050(9) Uiso 1 1 d . . .
O19 O 0.4808(13) 0.1227(12) 0.0437(6) 0.028(7) Uiso 1 1 d . . .
O20 O 0.5886(14) -0.0113(13) 0.0755(6) 0.039(7) Uiso 1 1 d . . .
```



O21 O 0.6016(13) -0.1173(12) 0.1496(6) 0.032(7) Uiso 1 1 d . . . .  
O22 O 0.5254(14) -0.0114(14) 0.2032(7) 0.043(8) Uiso 1 1 d . . . .  
O23 O 0.3925(15) 0.1194(14) 0.1970(7) 0.046(8) Uiso 1 1 d . . . .  
O24 O 0.4307(13) 0.1871(12) 0.1160(6) 0.030(7) Uiso 1 1 d . . . .  
O25 O 0.4847(13) 0.0856(13) 0.1586(6) 0.034(7) Uiso 1 1 d . . . .  
O26 O 0.5588(12) -0.0093(11) 0.1386(6) 0.025(6) Uiso 1 1 d . . . .  
O27 O 0.5152(13) 0.0862(12) 0.0983(6) 0.030(7) Uiso 1 1 d . . . .  
O28 O 0.4636(13) 0.0039(12) 0.0654(6) 0.030(7) Uiso 1 1 d . . . .  
O29 O 0.5095(13) -0.0905(12) 0.1059(6) 0.032(7) Uiso 1 1 d . . . .  
O30 O 0.4816(16) -0.0967(15) 0.1780(7) 0.052(9) Uiso 1 1 d . . . .  
O31 O 0.3944(16) 0.0045(15) 0.1932(8) 0.057(9) Uiso 1 1 d . . . .  
O32 O 0.3542(12) 0.1083(11) 0.1438(6) 0.025(6) Uiso 1 1 d . . . .  
O33 O 0.3751(14) 0.1246(14) 0.0834(7) 0.042(8) Uiso 1 1 d . . . .  
O34 O 0.3513(11) 0.0143(11) 0.1081(5) 0.020(6) Uiso 1 1 d . . . .  
O35 O 0.2459(13) 0.0563(12) 0.1407(6) 0.034(7) Uiso 1 1 d . . . .  
O36 O 0.3471(13) -0.0387(12) 0.0437(6) 0.030(7) Uiso 1 1 d . . . .  
O37 O 0.3866(16) -0.0947(15) 0.1433(7) 0.054(9) Uiso 1 1 d . . . .  
O38 O 0.4676(15) -0.1074(14) 0.0430(7) 0.044(8) Uiso 1 1 d . . . .  
O39 O 0.2521(13) 0.1681(12) 0.1131(6) 0.034(7) Uiso 1 1 d . . . .  
O40 O 0.2623(12) 0.0871(11) 0.0767(5) 0.023(6) Uiso 1 1 d . . . .  
O41 O 0.2167(13) 0.1962(12) 0.0562(6) 0.028(7) Uiso 1 1 d . . . .  
O42 O 0.1409(14) 0.2334(13) 0.1333(6) 0.041(8) Uiso 1 1 d . . . .  
O43 O 0.0056(13) 0.1310(13) 0.1445(6) 0.035(7) Uiso 1 1 d . . . .  
O44 O -0.0183(14) -0.0167(13) 0.1257(6) 0.037(7) Uiso 1 1 d . . . .  
O45 O 0.0821(12) -0.0135(11) 0.0522(5) 0.021(6) Uiso 1 1 d . . . .  
O46 O 0.2447(12) 0.0501(11) 0.0256(6) 0.025(6) Uiso 1 1 d . . . .  
O47 O 0.1439(11) 0.0964(11) 0.0552(5) 0.020(6) Uiso 1 1 d . . . .  
O48 O 0.1093(12) 0.1623(11) 0.1004(5) 0.020(6) Uiso 1 1 d . . . .  
O49 O 0.0449(12) 0.0645(11) 0.0974(5) 0.022(6) Uiso 1 1 d . . . .  
O50 O 0.2406(16) 0.2840(15) 0.0923(7) 0.056(9) Uiso 1 1 d . . . .  
O51 O 0.0450(18) 0.2161(17) 0.1785(8) 0.068(11) Uiso 1 1 d . . . .  
O52 O 0.1280(14) 0.1222(13) 0.1629(6) 0.038(7) Uiso 1 1 d . . . .  
O53 O 0.0630(14) 0.0233(13) 0.1604(6) 0.041(8) Uiso 1 1 d . . . .  
O54 O -0.0687(15) 0.0458(14) 0.1749(7) 0.046(8) Uiso 1 1 d . . . .  
O55 O 0.1020(12) -0.0641(11) 0.1078(5) 0.022(6) Uiso 1 1 d . . . .  
O56 O -0.0025(15) -0.0951(15) 0.0800(7) 0.050(9) Uiso 1 1 d . . . .  
O57 O 0.1965(12) -0.0215(11) 0.0742(5) 0.020(6) Uiso 1 1 d . . . .  
O58 O 0.1889(13) -0.0501(12) 0.0137(6) 0.029(7) Uiso 1 1 d . . . .  
O59 O 0.3157(15) 0.1440(14) 0.0197(7) 0.046(8) Uiso 1 1 d . . . .  
O60 O 0.1834(14) 0.1563(13) 0.0078(6) 0.037(7) Uiso 1 1 d . . . .  
O61 O 0.1206(13) 0.2679(13) 0.0743(6) 0.034(7) Uiso 1 1 d . . . .  
O62 O 0.0220(13) 0.2430(13) 0.1165(6) 0.035(7) Uiso 1 1 d . . . .  
O63 O -0.0754(14) 0.0917(13) 0.1126(6) 0.040(8) Uiso 1 1 d . . . .  
O64 O -0.0401(14) 0.0223(13) 0.0672(7) 0.041(8) Uiso 1 1 d . . . .  
O65 O 0.1234(13) 0.0634(12) 0.0053(6) 0.030(7) Uiso 1 1 d . . . .  
O66 O 0.0171(14) 0.1152(13) 0.0334(6) 0.039(8) Uiso 1 1 d . . . .  
O67 O -0.0188(14) 0.1770(13) 0.0762(6) 0.039(8) Uiso 1 1 d . . . .  
O68 O 0.0768(12) 0.2065(11) 0.0360(5) 0.022(6) Uiso 1 1 d . . . .  
O69 O -0.1190(16) 0.1300(15) 0.0545(7) 0.050(9) Uiso 1 1 d . . . .  
O70 O 0.0673(13) 0.1744(12) -0.0198(6) 0.034(7) Uiso 1 1 d . . . .  
O71 O -0.0072(15) 0.3003(14) 0.0604(7) 0.048(8) Uiso 1 1 d . . . .  
O72 O 0.2897(12) -0.0903(11) 0.1040(5) 0.021(6) Uiso 1 1 d . . . .  
O73 O 0.1929(12) -0.0388(11) 0.1408(5) 0.022(6) Uiso 1 1 d . . . .  
O74 O 0.1108(16) 0.0552(15) 0.2222(7) 0.052(9) Uiso 1 1 d . . . .  
O75 O 0.243(2) 0.085(2) 0.1995(11) 0.111(16) Uiso 1 1 d . . . .  
O76 O 0.2738(17) -0.0363(16) 0.1937(8) 0.064(10) Uiso 1 1 d . . . .  
O77 O 0.3954(13) -0.1686(13) 0.0895(6) 0.035(7) Uiso 1 1 d . . . .  
O78 O 0.3233(13) -0.2449(12) 0.0601(6) 0.029(7) Uiso 1 1 d . . . .  
O79 O 0.2261(15) -0.1982(14) 0.0220(7) 0.045(8) Uiso 1 1 d . . . .  
O80 O 0.2064(12) -0.2611(12) 0.0811(6) 0.027(6) Uiso 1 1 d . . . .  
O81 O 0.1853(12) -0.3108(11) 0.0322(6) 0.025(6) Uiso 1 1 d . . . .  
O82 O 0.1566(13) -0.3821(12) 0.0829(6) 0.030(7) Uiso 1 1 d . . . .  
O83 O 0.1328(16) -0.4121(15) 0.0233(7) 0.055(9) Uiso 1 1 d . . . .  
O84 O 0.2262(15) -0.4724(14) 0.0620(7) 0.044(8) Uiso 1 1 d . . . .

|      |   |         |      |         |      |         |     |       |      |      |   |   |   |   |   |   |   |
|------|---|---------|------|---------|------|---------|-----|-------|------|------|---|---|---|---|---|---|---|
| O85  | O | 0.1736  | (12) | -0.4792 | (11) | 0.1185  | (5) | 0.022 | (6)  | Uiso | 1 | 1 | d | . | . | . | . |
| O86  | O | 0.2104  | (14) | -0.5860 | (13) | 0.0963  | (6) | 0.040 | (8)  | Uiso | 1 | 1 | d | . | . | . | . |
| O87  | O | 0.2863  | (13) | -0.5453 | (12) | 0.1389  | (6) | 0.030 | (7)  | Uiso | 1 | 1 | d | . | . | . | . |
| O88  | O | 0.2756  | (13) | -0.4466 | (12) | 0.1690  | (6) | 0.029 | (7)  | Uiso | 1 | 1 | d | . | . | . | . |
| O89  | O | 0.3660  | (13) | -0.5427 | (13) | 0.1849  | (6) | 0.034 | (7)  | Uiso | 1 | 1 | d | . | . | . | . |
| O90  | O | 0.3979  | (12) | -0.4334 | (11) | 0.1506  | (5) | 0.023 | (6)  | Uiso | 1 | 1 | d | . | . | . | . |
| O91  | O | 0.3195  | (13) | -0.3365 | (12) | 0.1670  | (6) | 0.030 | (7)  | Uiso | 1 | 1 | d | . | . | . | . |
| O92  | O | 0.4503  | (14) | -0.3493 | (13) | 0.1805  | (7) | 0.042 | (8)  | Uiso | 1 | 1 | d | . | . | . | . |
| O93  | O | 0.4081  | (12) | -0.2691 | (12) | 0.1325  | (6) | 0.027 | (6)  | Uiso | 1 | 1 | d | . | . | . | . |
| O94  | O | 0.4492  | (12) | -0.2748 | (11) | 0.0741  | (5) | 0.021 | (6)  | Uiso | 1 | 1 | d | . | . | . | . |
| O95  | O | 0.3107  | (13) | -0.3001 | (13) | 0.0117  | (6) | 0.035 | (7)  | Uiso | 1 | 1 | d | . | . | . | . |
| O96  | O | 0.2678  | (13) | -0.4013 | (12) | 0.0133  | (6) | 0.030 | (7)  | Uiso | 1 | 1 | d | . | . | . | . |
| O97  | O | 0.3296  | (12) | -0.5446 | (11) | 0.0790  | (5) | 0.024 | (6)  | Uiso | 1 | 1 | d | . | . | . | . |
| O98  | O | 0.4098  | (12) | -0.5282 | (12) | 0.1225  | (6) | 0.026 | (6)  | Uiso | 1 | 1 | d | . | . | . | . |
| O99  | O | 0.4796  | (13) | -0.3633 | (12) | 0.1186  | (6) | 0.030 | (7)  | Uiso | 1 | 1 | d | . | . | . | . |
| O100 | O | 0.2051  | (17) | -0.5597 | (16) | 0.1959  | (8) | 0.061 | (10) | Uiso | 1 | 1 | d | . | . | . | . |
| O101 | O | 0.2843  | (11) | -0.3614 | (11) | 0.0615  | (5) | 0.020 | (6)  | Uiso | 1 | 1 | d | . | . | . | . |
| O102 | O | 0.3638  | (13) | -0.3405 | (12) | 0.1034  | (6) | 0.028 | (7)  | Uiso | 1 | 1 | d | . | . | . | . |
| O103 | O | 0.3740  | (12) | -0.4558 | (11) | 0.0434  | (6) | 0.025 | (6)  | Uiso | 1 | 1 | d | . | . | . | . |
| O104 | O | 0.4179  | (13) | -0.3525 | (12) | 0.0402  | (6) | 0.029 | (7)  | Uiso | 1 | 1 | d | . | . | . | . |
| O105 | O | 0.4520  | (12) | -0.4405 | (12) | 0.0820  | (6) | 0.027 | (6)  | Uiso | 1 | 1 | d | . | . | . | . |
| O106 | O | 0.4627  | (13) | -0.5532 | (12) | 0.0642  | (6) | 0.030 | (7)  | Uiso | 1 | 1 | d | . | . | . | . |
| O107 | O | 0.3967  | (13) | -0.3911 | (12) | -0.0137 | (6) | 0.030 | (7)  | Uiso | 1 | 1 | d | . | . | . | . |
| O108 | O | 0.5453  | (15) | -0.3645 | (14) | 0.0598  | (7) | 0.044 | (8)  | Uiso | 1 | 1 | d | . | . | . | . |
| O109 | O | 0.1854  | (12) | -0.1535 | (11) | 0.1357  | (5) | 0.020 | (6)  | Uiso | 1 | 1 | d | . | . | . | . |
| O110 | O | 0.1931  | (10) | -0.1435 | (10) | 0.0807  | (5) | 0.012 | (5)  | Uiso | 1 | 1 | d | . | . | . | . |
| O111 | O | 0.1917  | (13) | -0.2759 | (12) | 0.1470  | (6) | 0.030 | (7)  | Uiso | 1 | 1 | d | . | . | . | . |
| O112 | O | 0.2675  | (14) | -0.4025 | (13) | 0.2287  | (7) | 0.041 | (8)  | Uiso | 1 | 1 | d | . | . | . | . |
| O113 | O | 0.2250  | (12) | -0.2837 | (11) | 0.2166  | (5) | 0.023 | (6)  | Uiso | 1 | 1 | d | . | . | . | . |
| O114 | O | 0.1598  | (12) | -0.3824 | (11) | 0.1458  | (5) | 0.023 | (6)  | Uiso | 1 | 1 | d | . | . | . | . |
| O115 | O | 0.1087  | (13) | -0.3271 | (12) | 0.2053  | (6) | 0.029 | (7)  | Uiso | 1 | 1 | d | . | . | . | . |
| O116 | O | -0.0356 | (13) | -0.1640 | (12) | 0.1409  | (6) | 0.029 | (7)  | Uiso | 1 | 1 | d | . | . | . | . |
| O117 | O | 0.0515  | (11) | -0.3368 | (10) | 0.1170  | (5) | 0.015 | (5)  | Uiso | 1 | 1 | d | . | . | . | . |
| O118 | O | 0.0167  | (12) | -0.2862 | (11) | 0.1654  | (5) | 0.024 | (6)  | Uiso | 1 | 1 | d | . | . | . | . |
| O119 | O | -0.0022 | (14) | -0.5247 | (13) | 0.1253  | (6) | 0.038 | (7)  | Uiso | 1 | 1 | d | . | . | . | . |
| O120 | O | 0.0952  | (13) | -0.2154 | (12) | 0.1135  | (6) | 0.031 | (7)  | Uiso | 1 | 1 | d | . | . | . | . |
| O121 | O | 0.0539  | (13) | -0.2556 | (12) | 0.0635  | (6) | 0.029 | (7)  | Uiso | 1 | 1 | d | . | . | . | . |
| O122 | O | -0.0749 | (13) | -0.1779 | (13) | 0.0821  | (6) | 0.034 | (7)  | Uiso | 1 | 1 | d | . | . | . | . |
| O123 | O | -0.1150 | (12) | -0.2569 | (12) | 0.1383  | (6) | 0.028 | (6)  | Uiso | 1 | 1 | d | . | . | . | . |
| O124 | O | -0.0642 | (14) | -0.3090 | (13) | 0.0896  | (6) | 0.038 | (7)  | Uiso | 1 | 1 | d | . | . | . | . |
| O125 | O | 0.0503  | (12) | -0.4362 | (11) | 0.0926  | (5) | 0.022 | (6)  | Uiso | 1 | 1 | d | . | . | . | . |
| O126 | O | 0.0590  | (13) | -0.4524 | (13) | 0.1503  | (6) | 0.035 | (7)  | Uiso | 1 | 1 | d | . | . | . | . |
| O127 | O | 0.0092  | (13) | -0.3907 | (12) | 0.2075  | (6) | 0.031 | (7)  | Uiso | 1 | 1 | d | . | . | . | . |
| O128 | O | -0.0811 | (11) | -0.2995 | (11) | 0.2074  | (5) | 0.018 | (6)  | Uiso | 1 | 1 | d | . | . | . | . |
| O129 | O | -0.1852 | (13) | -0.3043 | (13) | 0.2520  | (6) | 0.034 | (7)  | Uiso | 1 | 1 | d | . | . | . | . |
| O130 | O | -0.1098 | (14) | -0.4076 | (13) | 0.2302  | (6) | 0.036 | (7)  | Uiso | 1 | 1 | d | . | . | . | . |
| O131 | O | -0.0073 | (14) | -0.4687 | (14) | 0.2608  | (7) | 0.043 | (8)  | Uiso | 1 | 1 | d | . | . | . | . |
| O132 | O | 0.0339  | (13) | -0.5086 | (12) | 0.2057  | (6) | 0.033 | (7)  | Uiso | 1 | 1 | d | . | . | . | . |
| O133 | O | 0.0941  | (15) | -0.5793 | (14) | 0.1632  | (7) | 0.043 | (8)  | Uiso | 1 | 1 | d | . | . | . | . |
| O134 | O | -0.1378 | (16) | 0.0109  | (15) | 0.3464  | (7) | 0.055 | (9)  | Uiso | 1 | 1 | d | . | . | . | . |
| O135 | O | 0.0162  | (13) | -0.5199 | (15) | 0.0592  | (7) | 0.051 | (9)  | Uiso | 1 | 1 | d | . | . | . | . |
| O136 | O | -0.0639 | (13) | -0.4124 | (12) | 0.0616  | (6) | 0.030 | (7)  | Uiso | 1 | 1 | d | . | . | . | . |
| O137 | O | -0.1536 | (15) | -0.3114 | (14) | 0.0471  | (7) | 0.046 | (8)  | Uiso | 1 | 1 | d | . | . | . | . |
| O138 | O | -0.1875 | (13) | -0.3191 | (12) | 0.1089  | (6) | 0.029 | (7)  | Uiso | 1 | 1 | d | . | . | . | . |
| O139 | O | -0.2464 | (14) | -0.2166 | (13) | 0.1352  | (6) | 0.040 | (8)  | Uiso | 1 | 1 | d | . | . | . | . |
| O140 | O | -0.2023 | (13) | -0.2719 | (12) | 0.1894  | (6) | 0.029 | (7)  | Uiso | 1 | 1 | d | . | . | . | . |
| O141 | O | -0.1511 | (12) | -0.3655 | (12) | 0.1695  | (6) | 0.028 | (6)  | Uiso | 1 | 1 | d | . | . | . | . |
| O142 | O | -0.0657 | (13) | -0.4622 | (13) | 0.1754  | (6) | 0.035 | (7)  | Uiso | 1 | 1 | d | . | . | . | . |
| O143 | O | -0.0958 | (13) | -0.4214 | (12) | 0.1202  | (6) | 0.031 | (7)  | Uiso | 1 | 1 | d | . | . | . | . |
| O144 | O | -0.1007 | (17) | -0.5120 | (16) | 0.0919  | (8) | 0.062 | (10) | Uiso | 1 | 1 | d | . | . | . | . |
| O145 | O | -0.1891 | (15) | -0.4150 | (14) | 0.0841  | (7) | 0.045 | (8)  | Uiso | 1 | 1 | d | . | . | . | . |
| O146 | O | -0.2701 | (15) | -0.3318 | (14) | 0.1585  | (7) | 0.046 | (8)  | Uiso | 1 | 1 | d | . | . | . | . |
| O147 | O | -0.2353 | (13) | -0.3759 | (12) | 0.2166  | (6) | 0.032 | (7)  | Uiso | 1 | 1 | d | . | . | . | . |
| O148 | O | -0.0861 | (13) | -0.5216 | (12) | 0.2286  | (6) | 0.031 | (7)  | Uiso | 1 | 1 | d | . | . | . | . |

O149 O -0.0403 (13) -0.5755 (13) 0.1817 (6) 0.035 (7) Uiso 1 1 d . . . .  
O150 O -0.1466 (14) -0.5311 (13) 0.1509 (6) 0.037 (7) Uiso 1 1 d . . . .  
O151 O -0.2322 (14) -0.4369 (13) 0.1436 (6) 0.037 (7) Uiso 1 1 d . . . .  
O152 O -0.1954 (15) -0.4786 (14) 0.1988 (7) 0.044 (8) Uiso 1 1 d . . . .  
O153 O -0.1616 (18) -0.5965 (17) 0.2082 (8) 0.071 (11) Uiso 1 1 d . . . .  
O154 O -0.3285 (17) -0.4247 (16) 0.1899 (8) 0.062 (10) Uiso 1 1 d . . . .  
O155 O -0.2316 (19) -0.5221 (18) 0.1057 (9) 0.073 (11) Uiso 1 1 d . . . .  
O156 O 0.1529 (13) -0.4444 (12) 0.2072 (6) 0.033 (7) Uiso 1 1 d . . . .  
O157 O 0.2864 (12) -0.2238 (11) 0.1130 (5) 0.022 (6) Uiso 1 1 d . . . .  
O158 O 0.1452 (13) -0.0663 (12) 0.2095 (6) 0.034 (7) Uiso 1 1 d . . . .  
O159 O 0.0777 (14) -0.1416 (13) 0.2504 (7) 0.041 (8) Uiso 1 1 d . . . .  
O160 O 0.2010 (12) -0.1741 (11) 0.2403 (5) 0.022 (6) Uiso 1 1 d . . . .  
O161 O 0.1252 (13) -0.2587 (13) 0.2594 (6) 0.034 (7) Uiso 1 1 d . . . .  
O162 O 0.2282 (13) -0.3362 (12) 0.2764 (6) 0.029 (7) Uiso 1 1 d . . . .  
O163 O 0.1343 (13) -0.3444 (12) 0.3227 (6) 0.031 (7) Uiso 1 1 d . . . .  
O164 O 0.2550 (16) -0.4149 (15) 0.3300 (7) 0.052 (9) Uiso 1 1 d . . . .  
O165 O 0.2164 (14) -0.3147 (13) 0.3583 (6) 0.040 (8) Uiso 1 1 d . . . .  
O166 O 0.0920 (14) -0.2875 (14) 0.3668 (7) 0.042 (8) Uiso 1 1 d . . . .  
O167 O 0.1605 (16) -0.3266 (15) 0.4185 (7) 0.052 (9) Uiso 1 1 d . . . .  
O168 O 0.1129 (17) -0.2060 (16) 0.4038 (8) 0.060 (10) Uiso 1 1 d . . . .  
O169 O -0.0293 (14) -0.3160 (14) 0.3716 (7) 0.043 (8) Uiso 1 1 d . . . .  
O170 O 0.1161 (17) -0.0641 (16) 0.3497 (8) 0.063 (10) Uiso 1 1 d . . . .  
O171 O 0.0223 (15) -0.0628 (14) 0.3163 (7) 0.048 (8) Uiso 1 1 d . . . .  
O172 O 0.0723 (17) 0.0414 (16) 0.3099 (8) 0.062 (10) Uiso 1 1 d . . . .  
O173 O 0.1036 (14) -0.0352 (13) 0.2650 (7) 0.041 (8) Uiso 1 1 d . . . .  
O174 O 0.1711 (13) -0.1905 (12) 0.3510 (6) 0.031 (7) Uiso 1 1 d . . . .  
O175 O 0.2091 (14) -0.2409 (13) 0.3004 (6) 0.037 (7) Uiso 1 1 d . . . .  
O176 O 0.1620 (14) -0.1237 (13) 0.2958 (6) 0.039 (8) Uiso 1 1 d . . . .  
O177 O 0.1948 (16) -0.0207 (15) 0.3028 (7) 0.056 (9) Uiso 1 1 d . . . .  
O178 O 0.2318 (14) -0.0688 (13) 0.2527 (6) 0.038 (7) Uiso 1 1 d . . . .  
O179 O 0.3022 (13) -0.2503 (13) 0.2582 (6) 0.035 (7) Uiso 1 1 d . . . .  
O180 O 0.3134 (14) -0.3118 (13) 0.3145 (6) 0.036 (7) Uiso 1 1 d . . . .  
O181 O 0.240 (2) -0.2396 (18) 0.3938 (9) 0.078 (12) Uiso 1 1 d . . . .  
O182 O 0.1970 (18) -0.1292 (17) 0.3898 (8) 0.066 (10) Uiso 1 1 d . . . .  
O183 O 0.3128 (14) -0.2181 (14) 0.3393 (7) 0.042 (8) Uiso 1 1 d . . . .  
O184 O 0.3018 (14) -0.1532 (13) 0.2876 (6) 0.039 (8) Uiso 1 1 d . . . .  
O185 O 0.2617 (15) -0.1074 (14) 0.3355 (7) 0.046 (8) Uiso 1 1 d . . . .  
O186 O 0.3326 (18) -0.1567 (17) 0.3861 (8) 0.070 (11) Uiso 1 1 d . . . .  
O187 O 0.4093 (14) -0.2389 (14) 0.2917 (7) 0.042 (8) Uiso 1 1 d . . . .  
O188 O 0.3247 (18) -0.0354 (17) 0.2868 (8) 0.069 (11) Uiso 1 1 d . . . .  
O189 O -0.0655 (15) -0.1356 (14) 0.2454 (7) 0.049 (9) Uiso 1 1 d . . . .  
O190 O 0.0196 (12) -0.2867 (11) 0.3131 (6) 0.025 (6) Uiso 1 1 d . . . .  
O191 O -0.1035 (14) -0.2394 (13) 0.2776 (6) 0.041 (8) Uiso 1 1 d . . . .  
O192 O 0.0078 (12) -0.3177 (11) 0.2518 (5) 0.022 (6) Uiso 1 1 d . . . .  
O193 O -0.0082 (15) -0.1676 (14) 0.3053 (7) 0.044 (8) Uiso 1 1 d . . . .  
O194 O 0.0188 (12) -0.2283 (11) 0.2139 (5) 0.023 (6) Uiso 1 1 d . . . .  
O195 O -0.0774 (16) -0.1860 (15) 0.3584 (7) 0.053 (9) Uiso 1 1 d . . . .  
O196 O 0.0430 (14) -0.1523 (13) 0.3597 (7) 0.042 (8) Uiso 1 1 d . . . .  
O197 O -0.1023 (16) -0.0823 (15) 0.3172 (7) 0.056 (9) Uiso 1 1 d . . . .  
O198 O -0.0663 (18) -0.0828 (17) 0.3718 (8) 0.070 (11) Uiso 1 1 d . . . .  
O199 O -0.0574 (19) 0.0254 (18) 0.3960 (9) 0.074 (11) Uiso 1 1 d . . . .  
O200 O -0.1290 (16) -0.0701 (15) 0.4259 (7) 0.051 (9) Uiso 1 1 d . . . .  
O201 O -0.1482 (18) -0.1809 (17) 0.4161 (8) 0.069 (11) Uiso 1 1 d . . . .  
O202 O -0.192 (2) -0.1439 (19) 0.4730 (9) 0.081 (12) Uiso 1 1 d . . . .  
O203 O -0.289 (2) -0.160 (2) 0.4305 (10) 0.081 (13) Uiso 1 1 d . . . .  
O204 O -0.2370 (18) -0.2432 (17) 0.3945 (8) 0.069 (11) Uiso 1 1 d . . . .  
O205 O -0.350 (2) -0.256 (2) 0.4342 (11) 0.100 (15) Uiso 1 1 d . . . .  
O206 O -0.414 (2) -0.134 (2) 0.3421 (12) 0.106 (16) Uiso 1 1 d . . . .  
O207 O -0.371 (5) -0.271 (5) 0.199 (2) 0.26 (4) Uiso 1 1 d . . . .  
O208 O -0.2667 (19) -0.2319 (18) 0.3246 (9) 0.072 (11) Uiso 1 1 d . . . .  
O209 O -0.3190 (19) -0.1235 (18) 0.2996 (9) 0.079 (12) Uiso 1 1 d . . . .  
O210 O -0.2654 (19) -0.0818 (18) 0.2406 (9) 0.076 (12) Uiso 1 1 d . . . .  
O211 O -0.1913 (16) -0.1498 (15) 0.2845 (7) 0.053 (9) Uiso 1 1 d . . . .  
O212 O -0.1811 (14) -0.0326 (14) 0.2723 (7) 0.042 (8) Uiso 1 1 d . . . .

O213 O -0.0905(17) 0.0371(16) 0.2859(8) 0.061(10) Uiso 1 1 d . . . .  
O214 O -0.2326(15) -0.0581(14) 0.3271(7) 0.046(8) Uiso 1 1 d . . . .  
O215 O -0.2128(18) -0.0751(17) 0.3862(8) 0.067(11) Uiso 1 1 d . . . .  
O216 O -0.2972(19) -0.1368(18) 0.3645(9) 0.074(11) Uiso 1 1 d . . . .  
O217 O -0.1913(18) 0.0339(17) 0.4002(8) 0.068(11) Uiso 1 1 d . . . .  
O218 O -0.3085(17) -0.0088(16) 0.2847(8) 0.064(10) Uiso 1 1 d . . . .  
O219 O -0.2231(16) 0.0532(16) 0.3065(8) 0.058(10) Uiso 1 1 d . . . .  
O220 O -0.3603 -0.2307 0.3735 0.080(12) Uiso 1 1 d . . . .  
O221 O -0.2602(19) -0.0471(18) 0.4379(9) 0.076(12) Uiso 1 1 d . . . .  
O222 O -0.3913(19) -0.1440(19) 0.4052(9) 0.079(12) Uiso 1 1 d . . . .  
O223 O -0.303(4) -0.087(3) 0.5075(17) 0.18(3) Uiso 1 1 d . . . .  
O224 O -0.2843(17) 0.0381(16) 0.3612(8) 0.062(10) Uiso 1 1 d . . . .  
O225 O -0.3705(18) -0.0228(17) 0.3414(8) 0.069(11) Uiso 1 1 d . . . .  
O226 O -0.355(2) 0.0935(19) 0.3132(9) 0.084(13) Uiso 1 1 d . . . .  
O227 O -0.322(2) 0.063(2) 0.4205(11) 0.114(17) Uiso 1 1 d . . . .  
O228 O -0.482(2) -0.047(2) 0.3844(11) 0.110(16) Uiso 1 1 d . . . .  
O229 O -0.1508(15) -0.2694(14) 0.3408(7) 0.045(8) Uiso 1 1 d . . . .  
O230 O -0.132(2) -0.313(2) 0.4419(10) 0.089(13) Uiso 1 1 d . . . .  
O231 O -0.1488(17) -0.3624(16) 0.3888(8) 0.061(10) Uiso 1 1 d . . . .  
O232 O -0.0255(17) -0.2474(16) 0.4154(8) 0.060(10) Uiso 1 1 d . . . .  
O233 O -0.0204(16) -0.5175(15) 0.3509(7) 0.054(9) Uiso 1 1 d . . . .  
O234 O -0.0390(15) -0.4471(15) 0.3909(7) 0.050(9) Uiso 1 1 d . . . .  
O235 O -0.1182(18) -0.4289(17) 0.4437(8) 0.071(11) Uiso 1 1 d . . . .  
O236 O -0.0149(17) -0.5081(17) 0.4581(8) 0.065(10) Uiso 1 1 d . . . .  
O237 O -0.1028(17) -0.4625(16) 0.5056(8) 0.063(10) Uiso 1 1 d . . . .  
O238 O -0.0945(18) -0.5790(17) 0.4914(8) 0.067(10) Uiso 1 1 d . . . .  
O239 O 0.022(2) -0.627(2) 0.4738(10) 0.090(13) Uiso 1 1 d . . . .  
O240 O -0.035(3) -0.675(3) 0.5301(12) 0.125(18) Uiso 1 1 d . . . .  
O241 O -0.023(2) -0.738(2) 0.4817(10) 0.095(14) Uiso 1 1 d . . . .  
O242 O 0.0413(18) -0.7311(17) 0.4223(8) 0.068(11) Uiso 1 1 d . . . .  
O243 O -0.016(3) -0.828(3) 0.4449(14) 0.15(2) Uiso 1 1 d . . . .  
O244 O -0.067(2) -0.731(2) 0.4014(11) 0.110(16) Uiso 1 1 d . . . .  
O245 O 0.0129(19) -0.6606(18) 0.3743(9) 0.074(11) Uiso 1 1 d . . . .  
O246 O -0.039(2) -0.732(2) 0.3346(11) 0.102(15) Uiso 1 1 d . . . .  
O247 O -0.0651(19) -0.6128(18) 0.3312(9) 0.074(11) Uiso 1 1 d . . . .  
O248 O -0.115(2) -0.498(2) 0.3083(10) 0.087(13) Uiso 1 1 d . . . .  
O249 O -0.2192(19) -0.4565(18) 0.4171(9) 0.076(12) Uiso 1 1 d . . . .  
O250 O -0.1979(19) -0.4960(18) 0.4761(9) 0.074(11) Uiso 1 1 d . . . .  
O251 O -0.140(3) -0.688(3) 0.4962(13) 0.131(19) Uiso 1 1 d . . . .  
O252 O -0.127(3) -0.752(3) 0.4550(15) 0.15(2) Uiso 1 1 d . . . .  
O253 O -0.153(2) -0.680(2) 0.3614(10) 0.090(13) Uiso 1 1 d . . . .  
O254 O -0.185(2) -0.569(2) 0.3492(10) 0.088(13) Uiso 1 1 d . . . .  
O255 O -0.240(2) -0.563(2) 0.4036(11) 0.106(16) Uiso 1 1 d . . . .  
O256 O -0.216(2) -0.603(2) 0.4605(10) 0.091(14) Uiso 1 1 d . . . .  
O257 O -0.202(2) -0.671(2) 0.4190(10) 0.095(14) Uiso 1 1 d . . . .  
O258 O -0.250(3) -0.719(3) 0.4803(13) 0.128(19) Uiso 1 1 d . . . .  
O259 O -0.311(3) -0.509(3) 0.4536(13) 0.14(2) Uiso 1 1 d . . . .  
O260 O -0.281(3) -0.637(3) 0.3726(14) 0.15(2) Uiso 1 1 d . . . .  
O261 O 0.0873(16) -0.6282(16) 0.4186(8) 0.058(9) Uiso 1 1 d . . . .  
O262 O 0.0711(17) -0.5200(16) 0.3965(8) 0.061(10) Uiso 1 1 d . . . .  
O263 O 0.108(2) -0.4521(19) 0.4387(9) 0.085(13) Uiso 1 1 d . . . .  
O264 O 0.166(2) -0.641(2) 0.4694(10) 0.089(13) Uiso 1 1 d . . . .  
O265 O 0.1974(15) -0.5486(14) 0.4256(7) 0.049(9) Uiso 1 1 d . . . .  
O266 O 0.234(4) -0.447(4) 0.3953(18) 0.08(2) Uiso 0.50 1 d P . . . .  
O267 O 0.334(4) -0.548(4) 0.4313(18) 0.08(2) Uiso 0.50 1 d P . . . .  
O268 O 0.2797(17) -0.6455(17) 0.4165(8) 0.065(10) Uiso 1 1 d . . . .  
O269 O 0.3642(17) -0.6842(16) 0.4629(8) 0.064(10) Uiso 1 1 d . . . .  
O270 O 0.4002(16) -0.6850(15) 0.4007(7) 0.053(9) Uiso 1 1 d . . . .  
O271 O 0.3508(17) -0.5846(16) 0.3698(8) 0.063(10) Uiso 1 1 d . . . .  
O272 O 0.229(2) -0.5524(19) 0.3591(9) 0.083(13) Uiso 1 1 d . . . .  
O273 O 0.4850(17) -0.6000(16) 0.3698(8) 0.064(10) Uiso 1 1 d . . . .  
O274 O 0.4216(14) -0.6164(13) 0.3192(6) 0.037(7) Uiso 1 1 d . . . .  
O275 O 0.2937(13) -0.6082(12) 0.3065(6) 0.031(7) Uiso 1 1 d . . . .  
O276 O 0.3899(13) -0.6202(13) 0.2589(6) 0.034(7) Uiso 1 1 d . . . .

O277 O 0.3161(12) -0.7130(12) 0.2853(6) 0.028(7) Uiso 1 1 d . . . .  
O278 O 0.1917(16) -0.6745(15) 0.3033(7) 0.053(9) Uiso 1 1 d . . . .  
O279 O 0.2118(19) -0.7386(18) 0.2550(9) 0.074(11) Uiso 1 1 d . . . .  
O280 O 0.1629(15) -0.7895(14) 0.3110(7) 0.049(9) Uiso 1 1 d . . . .  
O281 O 0.1164(16) -0.7473(15) 0.3639(7) 0.054(9) Uiso 1 1 d . . . .  
O282 O 0.102(2) -0.863(2) 0.3603(10) 0.091(14) Uiso 1 1 d . . . .  
O283 O 0.1926(19) -0.8311(18) 0.3942(9) 0.074(11) Uiso 1 1 d . . . .  
O284 O 0.1712(17) -0.7210(16) 0.4105(8) 0.064(10) Uiso 1 1 d . . . .  
O285 O 0.1626(19) -0.8249(18) 0.4561(9) 0.079(12) Uiso 1 1 d . . . .  
O286 O 0.2641(17) -0.7487(16) 0.4505(8) 0.060(10) Uiso 1 1 d . . . .  
O287 O 0.3014(17) -0.7577(16) 0.3948(8) 0.058(10) Uiso 1 1 d . . . .  
O288 O 0.3594(13) -0.7021(13) 0.3426(6) 0.035(7) Uiso 1 1 d . . . .  
O289 O 0.2601(14) -0.7687(14) 0.3414(7) 0.043(8) Uiso 1 1 d . . . .  
O290 O 0.2902(15) -0.8239(14) 0.2943(7) 0.046(8) Uiso 1 1 d . . . .  
O291 O 0.231(2) -0.877(2) 0.3435(10) 0.088(13) Uiso 1 1 d . . . .  
O292 O 0.2912(17) -0.8568(16) 0.4306(8) 0.061(10) Uiso 1 1 d . . . .  
O293 O 0.3857(18) -0.7923(17) 0.4339(8) 0.066(10) Uiso 1 1 d . . . .  
O294 O 0.4399(14) -0.7219(13) 0.2981(6) 0.039(7) Uiso 1 1 d . . . .  
O295 O 0.4839(16) -0.7084(15) 0.3509(7) 0.056(9) Uiso 1 1 d . . . .  
O296 O 0.3930(13) -0.8177(13) 0.3241(6) 0.035(7) Uiso 1 1 d . . . .  
O297 O 0.4320(17) -0.8089(16) 0.3756(8) 0.060(10) Uiso 1 1 d . . . .  
O298 O 0.3364(16) -0.8712(15) 0.3724(7) 0.054(9) Uiso 1 1 d . . . .  
O299 O 0.423(2) -0.902(2) 0.4199(10) 0.087(13) Uiso 1 1 d . . . .  
O300 O 0.5264(15) -0.8068(14) 0.3244(7) 0.048(8) Uiso 1 1 d . . . .  
O301 O 0.3503(15) -0.9296(15) 0.3212(7) 0.050(9) Uiso 1 1 d . . . .  
O302 O 0.1420(17) -0.6339(16) 0.3608(8) 0.059(10) Uiso 1 1 d . . . .  
O303 O 0.0707(16) -0.5947(16) 0.3077(8) 0.058(9) Uiso 1 1 d . . . .  
O304 O 0.2286(18) -0.4889(17) 0.2972(8) 0.068(11) Uiso 1 1 d . . . .  
O305 O 0.1718(17) -0.5574(17) 0.2637(8) 0.065(10) Uiso 1 1 d . . . .  
O306 O 0.1065(17) -0.5020(16) 0.3354(8) 0.064(10) Uiso 1 1 d . . . .  
O307 O 0.0147(13) -0.4019(12) 0.3326(6) 0.032(7) Uiso 1 1 d . . . .  
O308 O 0.0827(14) -0.4069(13) 0.3754(6) 0.036(7) Uiso 1 1 d . . . .  
O309 O -0.1416(18) -0.4793(17) 0.3670(8) 0.067(11) Uiso 1 1 d . . . .  
O310 O -0.119(3) 0.221(3) 0.1340(16) 0.18(3) Uiso 1 1 d . . . .  
O311 O -0.2454(14) 0.0600(13) 0.0556(6) 0.038(7) Uiso 1 1 d . . . .  
O312 O -0.214(4) 0.142(4) 0.2580(18) 0.13(3) Uiso 0.70 1 d P . . . .  
O313 O -0.204(3) 0.135(3) 0.3498(13) 0.130(19) Uiso 1 1 d . . . .  
O314 O -0.3794(18) -0.0929(17) 0.4645(8) 0.068(11) Uiso 1 1 d . . . .  
O317 O -0.532(3) -0.184(3) 0.3476(14) 0.15(2) Uiso 1 1 d . . . .  
O318 O -0.296(3) -0.405(3) 0.0452(15) 0.16(2) Uiso 1 1 d . . . .  
O319 O 0.0686(19) -0.3529(18) -0.0186(9) 0.077(12) Uiso 1 1 d . . . .  
O320 O -0.1425(15) -0.0326(14) 0.0546(7) 0.044(8) Uiso 1 1 d . . . .  
O321 O -0.2877(14) -0.0596(13) 0.0395(6) 0.040(8) Uiso 1 1 d . . . .  
O322 O -0.354(3) -0.214(3) 0.0569(14) 0.051(17) Uiso 0.50 1 d P . . . .  
O323 O -0.411(3) -0.086(2) 0.0143(12) 0.120(18) Uiso 1 1 d . . . .  
O324 O 0.0000 0.0000 0.0000 0.079(17) Uiso 1 2 d S . . . .  
O325 O -0.304(2) -0.296(2) -0.0198(10) 0.092(14) Uiso 1 1 d . . . .  
O326 O 0.114(3) -0.260(2) -0.0166(12) 0.125(18) Uiso 1 1 d . . . .  
O327 O 0.001(3) -0.420(3) -0.0036(15) 0.16(2) Uiso 1 1 d . . . .  
O328 O 0.109(3) -0.402(3) -0.0521(14) 0.15(2) Uiso 1 1 d . . . .  
O329 O 0.262(4) -0.431(3) -0.0444(17) 0.18(3) Uiso 1 1 d . . . .  
O331 O 0.254(4) -0.601(4) 0.4950(19) 0.14(3) Uiso 0.70 1 d P . . . .  
O332 O -0.285(4) -0.458(3) 0.3590(17) 0.07(2) Uiso 0.50 1 d P . . . .  
O333 O -0.166(4) -0.013(4) 0.2077(18) 0.08(2) Uiso 0.50 1 d P . . . .  
O334 O -0.1733(19) -0.3073(18) -0.0137(9) 0.073(11) Uiso 1 1 d . . . .  
O335 O 0.1157(19) -0.7444(18) 0.5054(9) 0.078(12) Uiso 1 1 d . . . .  
O336 O -0.2197(19) -0.4761(18) 0.2670(9) 0.076(12) Uiso 1 1 d . . . .  
O337 O 0.077(2) -0.639(2) 0.1125(11) 0.104(15) Uiso 1 1 d . . . .  
O338 O 0.0557(18) -0.7079(17) 0.2859(8) 0.071(11) Uiso 1 1 d . . . .  
O339 O -0.142(2) 0.104(2) 0.4409(12) 0.115(17) Uiso 1 1 d . . . .  
O340 O 0.512(3) -0.231(3) 0.3033(16) 0.18(3) Uiso 1 1 d . . . .  
O341 O 0.427(2) -1.002(2) 0.2981(11) 0.110(16) Uiso 1 1 d . . . .  
O342 O 0.694(6) -0.790(6) 0.369(3) 0.16(5) Uiso 0.50 1 d P . . . .  
O343 O 0.628(3) -0.843(3) 0.3683(14) 0.14(2) Uiso 1 1 d . . . .

O344 O 0.609(3) -0.703(3) 0.3607(16) 0.17(3) Uiso 1 1 d . . . .  
O345 O 0.683(3) -0.770(3) 0.3026(13) 0.14(2) Uiso 1 1 d . . . .  
O346 O -0.153(2) -0.068(2) 0.1347(10) 0.094(14) Uiso 1 1 d . . . .  
O347 O 0.559(3) -0.736(3) 0.2529(12) 0.125(18) Uiso 1 1 d . . . .  
O348 O 0.661(3) -0.869(3) 0.2407(15) 0.16(2) Uiso 1 1 d . . . .  
O349 O 0.462(2) -0.7327(19) 0.2164(9) 0.085(13) Uiso 1 1 d . . . .  
O350 O 0.521(2) -0.590(2) 0.2136(11) 0.105(15) Uiso 1 1 d . . . .  
O351 O 0.433(3) -0.645(3) 0.1525(14) 0.14(2) Uiso 1 1 d . . . .  
O352 O 0.530(3) -0.485(3) 0.1608(14) 0.15(2) Uiso 1 1 d . . . .  
O353 O 0.511(3) -0.706(3) 0.1144(13) 0.13(2) Uiso 1 1 d . . . .  
O355 O 0.375(3) -0.496(3) 0.2884(14) 0.14(2) Uiso 1 1 d . . . .  
O356 O 0.2945(19) -0.5242(18) 0.2394(9) 0.073(11) Uiso 1 1 d . . . .  
O357 O 0.679(3) -0.317(3) 0.0912(14) 0.14(2) Uiso 1 1 d . . . .  
O358 O 0.555(3) -0.047(3) 0.2806(12) 0.125(18) Uiso 1 1 d . . . .  
O359 O 0.437(4) -0.228(3) 0.2124(16) 0.07(2) Uiso 0.50 1 d P . . . .  
O360 O -0.287(4) -0.357(4) 0.373(2) 0.09(3) Uiso 0.50 1 d P . . . .  
O361 O -0.1226(18) -0.5314(17) 0.4299(8) 0.068(11) Uiso 1 1 d . . . .  
O362 O -0.082(2) -0.6549(19) 0.4419(9) 0.082(12) Uiso 1 1 d . . . .  
O363 O -0.1078(17) -0.6048(16) 0.3855(8) 0.062(10) Uiso 1 1 d . . . .  
O364 O -0.076(2) -0.622(2) 0.2724(11) 0.112(16) Uiso 1 1 d . . . .  
O366 O 0.499(2) -0.217(2) 0.1597(10) 0.087(13) Uiso 1 1 d . . . .  
O367 O 0.550(2) -0.219(2) 0.0882(11) 0.103(15) Uiso 1 1 d . . . .  
O368 O 0.596(4) -0.354(3) 0.1410(16) 0.18(3) Uiso 1 1 d . . . .  
O371 O 0.787(2) 0.1296(19) 0.1145(9) 0.084(13) Uiso 1 1 d . . . .  
O372 O 0.400(3) 0.200(2) 0.2521(12) 0.119(17) Uiso 1 1 d . . . .  
O373 O 0.0620(15) -0.0914(14) 0.4090(7) 0.046(8) Uiso 1 1 d . . . .  
O374 O 0.1879(18) 0.1063(17) 0.2745(8) 0.069(11) Uiso 1 1 d . . . .  
O375 O 0.501(2) -0.868(2) 0.2685(10) 0.095(14) Uiso 1 1 d . . . .  
O377 O -0.1226(15) -0.1709(14) 0.1935(7) 0.048(8) Uiso 1 1 d . . . .  
O378 O 0.395(2) -0.123(2) 0.2312(11) 0.102(15) Uiso 1 1 d . . . .  
O379 O 0.3046(18) -0.6694(17) 0.1430(8) 0.067(11) Uiso 1 1 d . . . .  
O380 O 0.391(3) -0.340(3) 0.2395(14) 0.15(2) Uiso 1 1 d . . . .  
O381 O 0.213(3) 0.324(2) 0.1589(12) 0.117(17) Uiso 1 1 d . . . .  
O382 O 0.098(4) -0.615(4) 0.2373(19) 0.13(3) Uiso 0.70 1 d P . . . .  
O383 O 0.202(2) 0.207(2) 0.1939(10) 0.095(14) Uiso 1 1 d . . . .  
O384 O 0.3118(14) -0.6675(13) 0.2085(6) 0.040(8) Uiso 1 1 d . . . .  
O385 O 0.217(2) -0.9922(19) 0.3680(9) 0.086(13) Uiso 1 1 d . . . .  
O386 O 0.123(3) -0.206(3) 0.4663(14) 0.15(2) Uiso 1 1 d . . . .  
O387 O -0.329(2) -0.346(2) -0.0591(11) 0.110(16) Uiso 1 1 d . . . .  
O388 O 0.280(2) 0.083(2) 0.2562(11) 0.104(15) Uiso 1 1 d . . . .  
O389 O 0.3161(12) -0.4495(11) 0.1071(5) 0.024(6) Uiso 1 1 d . . . .  
O390 O -0.200(3) -0.076(2) 0.1898(12) 0.122(18) Uiso 1 1 d . . . .  
O391 O -0.2323(15) -0.2017(14) 0.0510(7) 0.045(8) Uiso 1 1 d . . . .  
O392 O 0.329(3) -0.116(3) 0.0040(13) 0.060(16) Uiso 0.60 1 d P . . . .  
O393 O -0.283(3) -0.240(3) 0.4876(16) 0.06(2) Uiso 0.50 1 d P . . . .  
O394 O 0.365(4) -0.330(4) 0.3814(18) 0.20(3) Uiso 1 1 d . . . .  
Na15 Na 0.3584(14) -0.6757(13) 0.1088(6) 0.054(7) Uiso 0.70 1 d P . . . .  
Na16 Na -0.0149(13) -0.6334(12) 0.5685(6) 0.090(8) Uiso 1 1 d . . . .  
Na14 Na 0.2160(17) -0.4213(16) 0.4628(8) 0.128(11) Uiso 1 1 d . . . .  
Na13 Na 0.5598(11) -0.8984(11) 0.3823(5) 0.076(7) Uiso 1 1 d . . . .  
Na12 Na -0.0179(10) -0.1572(10) 0.4627(5) 0.063(6) Uiso 1 1 d . . . .  
Na11 Na -0.0006(17) -0.3026(16) 0.0187(8) 0.043(9) Uiso 0.50 1 d P . . . .  
. . . . .  
Na10 Na -0.3722(14) -0.2116(12) 0.3176(6) 0.082(8) Uiso 1 1 d . . . .  
Na6 Na 0.381(2) -1.047(2) 0.3518(10) 0.065(12) Uiso 0.50 1 d P . . . .  
Na8 Na 0.3784(9) -1.0154(8) 0.3827(4) 0.047(5) Uiso 1 1 d . . . .  
Na9 Na 0.3463(11) -0.6803(10) 0.5171(5) 0.066(6) Uiso 1 1 d . . . .  
Na5 Na -0.0357(11) -0.0175(11) 0.2322(5) 0.075(7) Uiso 1 1 d . . . .  
Na4 Na 0.6249(11) -0.2386(10) 0.1404(5) 0.067(6) Uiso 1 1 d . . . .  
Na7 Na 0.4167(12) -0.6350(11) 0.2065(5) 0.076(7) Uiso 1 1 d . . . .  
Na2 Na 0.5983(11) -0.8246(11) 0.2823(5) 0.075(7) Uiso 1 1 d . . . .  
Na1 Na -0.0837(14) -0.3764(13) 0.2934(6) 0.102(9) Uiso 1 1 d . . . .  
K1 K -0.2234(5) -0.3713(4) 0.3205(2) 0.035(2) Uani 1 1 d . . . .  
K4 K 0.0606(6) -0.1227(6) 0.1745(2) 0.057(3) Uani 1 1 d . . . .

K5 K -0.2181(6) -0.1187(5) 0.0900(3) 0.056(3) Uani 1 1 d . . .  
K6 K 0.0809(6) -0.9465(6) 0.4164(3) 0.066(4) Uani 1 1 d . . .  
K7 K 0.4573(7) -0.5271(6) -0.0108(3) 0.080(5) Uani 1 1 d . . .  
K8 K -0.0682(6) 0.3572(5) 0.1225(3) 0.066(4) Uani 1 1 d . . .  
K9 K -0.3699(7) 0.0167(6) 0.2317(3) 0.073(4) Uani 1 1 d . . .  
K11 K -0.4299(6) -0.1030(6) 0.3665(3) 0.057(4) Uani 1 1 d . . .  
K2 K 0.1321(8) 0.3939(7) 0.0513(4) 0.092(5) Uani 1 1 d . . .  
K3 K -0.2577(7) -0.1414(7) 0.1863(4) 0.089(5) Uani 1 1 d . . .  
K12 K -0.1582(8) -0.0360(9) 0.3892(4) 0.107(7) Uani 1 1 d . . .  
As1 As 0.4842(2) 0.03677(18) 0.12997(9) 0.0272(10) Uani 1 1 d . . .  
As2 As 0.1272(2) 0.08392(17) 0.09670(8) 0.0230(9) Uani 1 1 d . . .  
As3 As 0.28630(19) -0.37173(17) 0.10301(8) 0.0190(9) Uani 1 1 d . . .  
As4 As -0.0715(2) -0.39305(18) 0.15258(9) 0.0251(10) Uani 1 1 d . . .  
As5 As 0.1399(3) -0.1956(2) 0.31506(9) 0.0371(12) Uani 1 1 d . . .  
As6 As -0.2172(3) -0.1181(3) 0.35574(10) 0.0602(17) Uani 1 1 d . . .  
As7 As -0.0617(3) -0.5900(3) 0.41688(15) 0.081(2) Uani 1 1 d . . .  
As8 As 0.2783(3) -0.7114(2) 0.36055(11) 0.0440(13) Uani 1 1 d . . .  
Cs7 Cs -0.3263(7) -0.0183(7) 0.3997(3) 0.137(5) Uani 0.50 1 d P . .  
Cs8 Cs -0.2408(7) -0.1428(7) 0.4300(3) 0.095(4) Uani 0.40 1 d P . .  
Cs1 Cs 0.07984(16) -0.13388(13) 0.02049(7) 0.0467(8) Uani 1 1 d . . .  
Cs2 Cs 0.29985(17) -0.18512(15) 0.17906(7) 0.0506(8) Uani 1 1 d . . .  
Cs3 Cs 0.1107(2) -0.41396(19) 0.27268(9) 0.0764(12) Uani 1 1 d . . .  
Cs5 Cs -0.3057(4) -0.2128(3) 0.24143(16) 0.067(2) Uani 0.50 1 d P . .  
Cs6 Cs -0.0407(4) -0.8754(4) 0.3317(2) 0.089(3) Uani 0.50 1 d P . .  
Cs4 Cs 0.4419(5) -0.2169(3) 0.00466(15) 0.052(2) Uani 0.40 1 d P . .  
Tb1 Tb 0.40450(10) -0.06837(8) 0.08760(4) 0.0250(5) Uani 1 1 d . . .  
Tb2 Tb 0.16957(11) 0.02418(9) 0.17699(4) 0.0311(5) Uani 1 1 d . . .  
Tb3 Tb 0.21388(10) -0.35853(8) 0.18374(4) 0.0216(4) Uani 1 1 d . . .  
Tb4 Tb -0.00925(10) -0.24998(9) 0.11470(4) 0.0232(4) Uani 1 1 d . . .  
Tb5 Tb 0.01141(11) -0.22338(9) 0.26578(4) 0.0305(5) Uani 1 1 d . . .  
Tb6 Tb -0.12371(14) -0.26267(12) 0.39030(5) 0.0600(8) Uani 1 1 d . .  
. . .  
Tb7 Tb 0.08883(15) -0.55658(13) 0.44683(6) 0.0723(10) Uani 1 1 d . .  
. . .  
Tb8 Tb 0.18047(12) -0.58017(10) 0.31790(5) 0.0453(6) Uani 1 1 d . . .  
W1 W 0.60199(10) 0.14153(8) 0.08936(4) 0.0382(5) Uani 1 1 d . . .  
W2 W 0.66653(10) 0.01300(9) 0.14391(5) 0.0411(5) Uani 1 1 d . . .  
W3 W 0.56009(10) 0.13896(9) 0.17267(5) 0.0411(5) Uani 1 1 d . . .  
W4 W 0.44796(10) 0.04551(9) 0.20675(4) 0.0419(5) Uani 1 1 d . . .  
W5 W 0.55854(10) -0.07831(9) 0.18296(4) 0.0395(5) Uani 1 1 d . . .  
W6 W 0.59358(9) -0.07832(8) 0.10785(4) 0.0320(4) Uani 1 1 d . . .  
W7 W 0.53340(9) 0.04676(8) 0.05287(4) 0.0320(4) Uani 1 1 d . . .  
W8 W 0.44245(9) 0.16761(8) 0.07375(4) 0.0348(5) Uani 1 1 d . . .  
W9 W 0.40277(10) 0.16526(8) 0.15673(4) 0.0375(5) Uani 1 1 d . . .  
W10 W 0.30729(9) 0.08215(7) 0.11349(4) 0.0276(4) Uani 1 1 d . . .  
W11 W 0.19663(10) 0.22519(7) 0.09576(4) 0.0343(5) Uani 1 1 d . . .  
W12 W 0.24291(9) 0.12710(7) 0.03807(4) 0.0274(4) Uani 1 1 d . . .  
W13 W 0.16669(9) 0.00714(7) 0.03421(3) 0.0234(4) Uani 1 1 d . . .  
W14 W 0.02957(9) -0.03234(7) 0.08895(4) 0.0271(4) Uani 1 1 d . . .  
W15 W -0.01015(10) 0.05316(9) 0.14411(4) 0.0385(5) Uani 1 1 d . . .  
W16 W 0.07322(11) 0.18285(8) 0.14731(4) 0.0399(5) Uani 1 1 d . . .  
W17 W 0.03940(10) 0.23892(8) 0.07513(4) 0.0359(5) Uani 1 1 d . . .  
W18 W 0.09066(9) 0.14335(7) 0.01534(4) 0.0296(4) Uani 1 1 d . . .  
W19 W -0.04721(9) 0.10580(8) 0.07150(4) 0.0369(5) Uani 1 1 d . . .  
W20 W 0.20511(8) -0.07957(7) 0.10915(3) 0.0199(4) Uani 1 1 d . . .  
W21 W 0.18043(8) -0.22004(7) 0.11534(3) 0.0187(4) Uani 1 1 d . . .  
W22 W 0.25312(9) -0.26516(8) 0.04126(3) 0.0273(4) Uani 1 1 d . . .  
W23 W 0.36676(8) -0.23859(7) 0.09562(3) 0.0227(4) Uani 1 1 d . . .  
W24 W 0.40264(8) -0.35086(7) 0.15053(4) 0.0248(4) Uani 1 1 d . . .  
W25 W 0.33948(9) -0.49257(7) 0.15316(4) 0.0259(4) Uani 1 1 d . . .  
W26 W 0.24233(9) -0.52173(7) 0.10087(4) 0.0293(4) Uani 1 1 d . . .  
W27 W 0.19638(9) -0.39631(8) 0.04351(4) 0.0283(4) Uani 1 1 d . . .  
W28 W 0.35479(9) -0.38176(8) 0.02149(4) 0.0289(4) Uani 1 1 d . . .  
W29 W 0.46772(8) -0.35852(7) 0.07738(4) 0.0267(4) Uani 1 1 d . . .

W30 W 0.40348(9) -0.50489(7) 0.08076(4) 0.0285(4) Uani 1 1 d . . .  
W31 W 0.10766(8) -0.40292(7) 0.12059(4) 0.0237(4) Uani 1 1 d . . .  
W32 W -0.01806(9) -0.47599(8) 0.08653(4) 0.0363(5) Uani 1 1 d . . .  
W33 W 0.02648(9) -0.52697(8) 0.16469(4) 0.0329(4) Uani 1 1 d . . .  
W34 W -0.03327(9) -0.45947(8) 0.22540(4) 0.0323(4) Uani 1 1 d . . .  
W35 W -0.15777(9) -0.33068(8) 0.21765(4) 0.0325(4) Uani 1 1 d . . .  
W36 W -0.19467(9) -0.27817(8) 0.14611(4) 0.0304(4) Uani 1 1 d . . .  
W37 W -0.12545(9) -0.35133(8) 0.08095(4) 0.0336(4) Uani 1 1 d . . .  
W38 W -0.17807(10) -0.48113(9) 0.11402(5) 0.0435(5) Uani 1 1 d . . .  
W39 W -0.25085(9) -0.40516(9) 0.18073(4) 0.0401(5) Uani 1 1 d . . .  
W40 W -0.12943(10) -0.53628(9) 0.19208(5) 0.0421(5) Uani 1 1 d . . .  
W41 W 0.02381(8) -0.30873(7) 0.20386(3) 0.0240(4) Uani 1 1 d . . .  
W42 W 0.14553(10) -0.10416(8) 0.24641(3) 0.0333(5) Uani 1 1 d . . .  
W43 W 0.20793(9) -0.25955(7) 0.25232(3) 0.0280(4) Uani 1 1 d . . .  
W44 W 0.22324(10) -0.34180(9) 0.32072(4) 0.0380(5) Uani 1 1 d . . .  
W45 W 0.16156(12) -0.27223(10) 0.38795(4) 0.0519(6) Uani 1 1 d . . .  
W46 W 0.10772(13) -0.12766(11) 0.38089(4) 0.0607(7) Uani 1 1 d . . .  
W47 W 0.09644(13) -0.03123(9) 0.30835(4) 0.0538(6) Uani 1 1 d . . .  
W48 W 0.25865(12) -0.07616(9) 0.29206(4) 0.0486(6) Uani 1 1 d . . .  
W49 W 0.32462(11) -0.23550(9) 0.29635(4) 0.0413(5) Uani 1 1 d . . .  
W50 W 0.26814(13) -0.17010(10) 0.36682(4) 0.0544(6) Uani 1 1 d . . .  
W51 W -0.03585(12) -0.13234(9) 0.33700(4) 0.0501(6) Uani 1 1 d . . .  
W52 W -0.11388(16) -0.02085(13) 0.38773(5) 0.0657(8) Uani 1 1 d . . .  
W53 W -0.14861(12) -0.00427(10) 0.30642(4) 0.0566(7) Uani 1 1 d . . .  
W54 W -0.24828(11) -0.08565(10) 0.27873(4) 0.0537(6) Uani 1 1 d . . .  
W55 W -0.34164(14) -0.18756(14) 0.33043(7) 0.0800(9) Uani 1 1 d . . .  
W56 W -0.31546(15) -0.20795(15) 0.40477(6) 0.0958(12) Uani 1 1 d . .  
. . .  
W57 W -0.19639(16) -0.12211(14) 0.43357(5) 0.0710(8) Uani 1 1 d . . .  
W58 W -0.27717(18) 0.00732(15) 0.40371(6) 0.0793(9) Uani 1 1 d . . .  
W59 W -0.31067(13) 0.02471(12) 0.32099(5) 0.0706(8) Uani 1 1 d . . .  
W60 W -0.39838(15) -0.07888(17) 0.37616(7) 0.0860(10) Uani 1 1 d . .  
. . .  
W61 W 0.03922(10) -0.33365(8) 0.34609(4) 0.0368(5) Uani 1 1 d . . .  
W62 W 0.04637(11) -0.47481(10) 0.36262(5) 0.0574(7) Uani 1 1 d . . .  
W63 W -0.10440(12) -0.53580(11) 0.34228(6) 0.0682(8) Uani 1 1 d . . .  
W64 W -0.12723(11) -0.43820(10) 0.40135(5) 0.0586(7) Uani 1 1 d . . .  
W65 W -0.09775(13) -0.49889(13) 0.47261(5) 0.0837(10) Uani 1 1 d . .  
. . .  
W66 W -0.04801(15) -0.65638(15) 0.49148(7) 0.1173(15) Uani 1 1 d . .  
. . .  
W67 W -0.03438(16) -0.75411(14) 0.43988(10) 0.1295(17) Uani 1 1 d . .  
. . .  
W68 W -0.06190(15) -0.68292(12) 0.36190(8) 0.0960(11) Uani 1 1 d . .  
. . .  
W69 W -0.21295(15) -0.62257(16) 0.38310(9) 0.1117(13) Uani 1 1 d . .  
. . .  
W70 W -0.18432(17) -0.68707(17) 0.46246(10) 0.1392(19) Uani 1 1 d . .  
. . .  
W71 W -0.23466(14) -0.52475(15) 0.44332(8) 0.1046(13) Uani 1 1 d . .  
. . .  
W72 W 0.09981(12) -0.67886(11) 0.39080(6) 0.0717(8) Uani 1 1 d . . .  
W73 W 0.15922(12) -0.81671(10) 0.35544(7) 0.0716(8) Uani 1 1 d . . .  
W74 W 0.23263(10) -0.74208(9) 0.29242(5) 0.0453(5) Uani 1 1 d . . .  
W75 W 0.36530(10) -0.65269(8) 0.29520(4) 0.0357(5) Uani 1 1 d . . .  
W76 W 0.42253(11) -0.63664(10) 0.36195(5) 0.0513(6) Uani 1 1 d . . .  
W77 W 0.33693(14) -0.70856(13) 0.43069(5) 0.0761(9) Uani 1 1 d . . .  
W78 W 0.21830(14) -0.79542(12) 0.42779(6) 0.0838(10) Uani 1 1 d . . .  
W79 W 0.37361(13) -0.84184(11) 0.40528(5) 0.0684(8) Uani 1 1 d . . .  
W80 W 0.31705(11) -0.86051(9) 0.33113(5) 0.0504(6) Uani 1 1 d . . .  
W81 W 0.45307(10) -0.76823(9) 0.33373(4) 0.0432(5) Uani 1 1 d . . .  
W82 W 0.2622(3) -0.5643(2) 0.39715(9) 0.0798(14) Uani 0.60 1 d P . .

loop\_



\_atom\_site\_aniso\_label  
\_atom\_site\_aniso\_U\_11  
\_atom\_site\_aniso\_U\_22  
\_atom\_site\_aniso\_U\_33  
\_atom\_site\_aniso\_U\_23  
\_atom\_site\_aniso\_U\_13  
\_atom\_site\_aniso\_U\_12  
K1 0.035(6) 0.035(6) 0.024(5) 0.012(4) 0.008(4) 0.015(5)  
K4 0.067(8) 0.073(9) 0.032(6) 0.004(6) -0.011(5) -0.016(7)  
K5 0.054(7) 0.055(8) 0.050(7) 0.006(6) 0.003(6) 0.008(6)  
K6 0.042(7) 0.051(8) 0.103(10) 0.007(7) -0.007(7) -0.014(6)  
K7 0.103(11) 0.053(8) 0.070(9) -0.010(7) 0.049(8) 0.013(8)  
K8 0.057(8) 0.041(8) 0.100(10) -0.031(7) 0.005(7) 0.010(6)  
K9 0.094(10) 0.067(9) 0.059(8) -0.013(7) -0.046(7) 0.021(8)  
K11 0.046(8) 0.058(9) 0.074(9) 0.003(7) -0.036(7) -0.021(7)  
K2 0.116(13) 0.063(10) 0.103(11) -0.053(9) -0.038(10) 0.034(9)  
K3 0.077(10) 0.098(12) 0.091(11) -0.035(9) -0.018(8) 0.031(9)  
K12 0.055(10) 0.161(19) 0.121(15) -0.049(13) 0.025(10) -0.061(12)  
As1 0.042(3) 0.016(2) 0.024(2) -0.0015(18) -0.0116(19) 0.000(2)  
As2 0.046(3) 0.010(2) 0.0106(19) 0.0000(15) -0.0066(18) 0.0102(19)  
As3 0.030(2) 0.011(2) 0.0162(19) -0.0052(16) -0.0039(17) 0.0043(17)  
As4 0.034(3) 0.016(2) 0.024(2) -0.0041(17) -0.0036(19) 0.0035(19)  
As5 0.068(3) 0.030(3) 0.0075(19) 0.0018(18) -0.001(2) 0.011(2)  
As6 0.077(4) 0.070(4) 0.016(2) 0.007(2) 0.005(2) 0.041(3)  
As7 0.065(4) 0.059(4) 0.084(4) 0.044(3) 0.043(3) 0.032(3)  
As8 0.053(3) 0.030(3) 0.038(3) 0.007(2) 0.006(2) 0.017(2)  
Cs7 0.130(11) 0.164(14) 0.102(9) -0.034(8) 0.000(8) 0.053(10)  
Cs8 0.079(9) 0.138(12) 0.074(8) -0.026(7) -0.001(7) -0.031(9)  
Cs1 0.065(2) 0.0228(16) 0.0567(19) -0.0078(14) -0.0330(16) 0.0017(15)  
Cs2 0.067(2) 0.051(2) 0.0340(16) -0.0015(15) -0.0028(15) -0.0107(17)  
Cs3 0.094(3) 0.070(3) 0.059(2) 0.004(2) -0.010(2) 0.006(2)  
Cs5 0.073(5) 0.060(5) 0.056(4) 0.005(4) 0.007(4) 0.022(4)  
Cs6 0.079(6) 0.057(5) 0.135(8) -0.031(5) -0.004(5) -0.004(4)  
Cs4 0.103(7) 0.037(5) 0.020(4) -0.003(3) 0.011(4) -0.036(5)  
Tb1 0.0371(12) 0.0132(11) 0.0244(10) 0.0005(8) -0.0074(9) -0.0009(9)  
Tb2 0.0643(15) 0.0142(11) 0.0133(9) -0.0022(8) -0.0082(10) 0.0070(10)  
Tb3 0.0361(12) 0.0119(10) 0.0140(9) 0.0002(8) -0.0018(8) 0.0064(9)  
Tb4 0.0321(12) 0.0198(11) 0.0157(9) -0.0027(8) -0.0031(8) 0.0068(9)  
Tb5 0.0523(14) 0.0240(12) 0.0087(9) 0.0019(8) 0.0010(9) 0.0149(10)  
Tb6 0.084(2) 0.0626(19) 0.0160(11) 0.0081(11) 0.0106(12) 0.0351(15)  
Tb7 0.080(2) 0.0627(19) 0.0403(15) 0.0346(13) 0.0374(14) 0.0466(16)  
Tb8 0.0551(16) 0.0286(14) 0.0407(13) 0.0124(11) 0.0072(12) 0.0127(11)  
W1 0.0460(12) 0.0246(11) 0.0470(11) -0.0056(9) -0.0133(9) -0.0078(9)  
W2 0.0441(12) 0.0309(12) 0.0514(12) -0.0099(9) -0.0211(10) 0.0022(9)  
W3 0.0513(13) 0.0298(11) 0.0471(12) -0.0132(9) -0.0233(10) 0.0008(9)  
W4 0.0586(14) 0.0339(12) 0.0350(11) -0.0089(9) -0.0184(10) 0.0043(10)  
W5 0.0554(13) 0.0296(11) 0.0340(10) -0.0033(8) -0.0200(9) 0.0050(9)  
W6 0.0385(11) 0.0233(10) 0.0350(10) -0.0068(8) -0.0103(8) 0.0022(8)  
W7 0.0452(12) 0.0251(10) 0.0272(9) 0.0001(8) -0.0081(8) -0.0098(9)  
W8 0.0458(12) 0.0173(10) 0.0425(11) 0.0022(8) -0.0163(9) -0.0059(9)  
W9 0.0499(12) 0.0206(10) 0.0453(11) -0.0127(8) -0.0172(9) 0.0036(9)  
W10 0.0411(11) 0.0129(9) 0.0294(9) -0.0009(7) -0.0124(8) 0.0003(8)  
W11 0.0630(13) 0.0117(9) 0.0289(10) -0.0044(7) -0.0172(9) 0.0050(9)  
W12 0.0459(11) 0.0149(9) 0.0202(8) -0.0004(7) -0.0023(8) -0.0013(8)  
W13 0.0436(11) 0.0144(9) 0.0119(8) -0.0019(6) -0.0052(7) 0.0005(8)  
W14 0.0378(11) 0.0204(10) 0.0226(9) 0.0007(7) -0.0087(8) -0.0004(8)  
W15 0.0521(13) 0.0316(11) 0.0258(10) -0.0004(8) 0.0022(9) 0.0112(9)  
W16 0.0756(15) 0.0209(10) 0.0190(9) -0.0066(7) -0.0056(9) 0.0182(10)  
W17 0.0606(13) 0.0182(10) 0.0250(9) -0.0009(7) -0.0117(9) 0.0155(9)  
W18 0.0554(12) 0.0170(9) 0.0162(8) 0.0010(7) -0.0149(8) 0.0027(8)  
W19 0.0432(12) 0.0278(11) 0.0366(10) 0.0016(8) -0.0133(9) 0.0097(9)  
W20 0.0361(10) 0.0110(8) 0.0117(7) 0.0000(6) -0.0056(7) 0.0022(7)  
W21 0.0321(10) 0.0091(8) 0.0137(8) -0.0016(6) -0.0033(7) 0.0036(7)  
W22 0.0440(11) 0.0214(10) 0.0140(8) -0.0029(7) -0.0024(7) 0.0077(8)

W23 0.0334 (10) 0.0116 (9) 0.0216 (8) -0.0028 (7) 0.0016 (7) 0.0018 (7)  
W24 0.0345 (10) 0.0179 (9) 0.0216 (8) -0.0034 (7) -0.0060 (7) 0.0029 (8)  
W25 0.0377 (10) 0.0123 (9) 0.0239 (9) 0.0001 (7) 0.0003 (8) 0.0076 (8)  
W26 0.0382 (11) 0.0127 (9) 0.0364 (10) -0.0100 (7) 0.0018 (8) 0.0036 (8)  
W27 0.0373 (11) 0.0287 (10) 0.0200 (8) -0.0137 (7) -0.0047 (8) 0.0064 (8)  
W28 0.0394 (11) 0.0272 (10) 0.0187 (8) -0.0088 (7) 0.0026 (8) 0.0056 (8)  
W29 0.0304 (10) 0.0192 (10) 0.0294 (9) -0.0062 (7) 0.0018 (8) 0.0022 (8)  
W30 0.0381 (11) 0.0159 (9) 0.0304 (9) -0.0088 (7) 0.0025 (8) 0.0045 (8)  
W31 0.0307 (10) 0.0169 (9) 0.0232 (9) -0.0072 (7) -0.0020 (7) 0.0041 (7)  
W32 0.0427 (12) 0.0305 (11) 0.0401 (11) -0.0197 (9) -0.0067 (9) -0.0011 (9)  
W33 0.0381 (11) 0.0175 (10) 0.0417 (11) -0.0041 (8) -0.0023 (9) 0.0016 (8)  
W34 0.0426 (11) 0.0207 (10) 0.0279 (9) 0.0054 (8) 0.0030 (8) 0.0047 (8)  
W35 0.0368 (11) 0.0294 (11) 0.0249 (9) 0.0018 (8) 0.0064 (8) 0.0088 (8)  
W36 0.0339 (11) 0.0254 (10) 0.0279 (9) 0.0001 (8) -0.0011 (8) 0.0081 (8)  
W37 0.0403 (11) 0.0338 (11) 0.0280 (9) -0.0092 (8) -0.0094 (8) 0.0023 (9)  
W38 0.0394 (12) 0.0373 (12) 0.0563 (13) -0.0136 (10) -0.0078 (10) -0.0031  
(10)  
W39 0.0348 (11) 0.0361 (12) 0.0457 (12) 0.0001 (9) 0.0008 (9) 0.0016 (9)  
W40 0.0423 (12) 0.0239 (11) 0.0573 (13) 0.0011 (9) -0.0001 (10) -0.0030 (9)  
W41 0.0341 (10) 0.0208 (9) 0.0125 (8) 0.0026 (7) 0.0006 (7) 0.0083 (8)  
W42 0.0708 (14) 0.0179 (10) 0.0090 (8) -0.0013 (7) -0.0049 (8) 0.0049 (9)  
W43 0.0496 (12) 0.0181 (9) 0.0144 (8) -0.0028 (7) -0.0032 (8) 0.0054 (8)  
W44 0.0509 (12) 0.0329 (11) 0.0242 (9) 0.0086 (8) -0.0048 (9) 0.0068 (9)  
W45 0.0827 (17) 0.0550 (15) 0.0131 (9) 0.0057 (9) -0.0091 (10) 0.0044 (12)  
W46 0.108 (2) 0.0603 (16) 0.0093 (9) -0.0074 (9) -0.0059 (10) 0.0157 (14)  
W47 0.111 (2) 0.0330 (12) 0.0140 (9) -0.0094 (8) -0.0044 (10) 0.0126 (12)  
W48 0.0971 (18) 0.0340 (12) 0.0173 (9) -0.0063 (8) -0.0118 (10) -0.0081  
(12)  
W49 0.0649 (14) 0.0383 (12) 0.0220 (9) -0.0035 (8) -0.0092 (9) -0.0072 (10)  
W50 0.0967 (18) 0.0522 (14) 0.0149 (9) -0.0053 (9) -0.0139 (10) -0.0022  
(13)  
W51 0.0868 (17) 0.0440 (13) 0.0089 (8) -0.0012 (8) -0.0006 (9) 0.0304 (12)  
W52 0.086 (2) 0.0721 (19) 0.0302 (12) -0.0113 (12) -0.0042 (13) 0.0308 (16)  
W53 0.0895 (18) 0.0462 (14) 0.0232 (10) 0.0018 (9) -0.0066 (11) 0.0306 (12)  
W54 0.0613 (15) 0.0573 (15) 0.0303 (11) 0.0058 (10) -0.0006 (10) 0.0268  
(12)  
W55 0.0631 (18) 0.088 (2) 0.0715 (18) 0.0249 (16) 0.0015 (14) 0.0134 (16)  
W56 0.087 (2) 0.104 (2) 0.0604 (16) 0.0409 (16) 0.0297 (15) 0.0443 (18)  
W57 0.086 (2) 0.086 (2) 0.0271 (12) -0.0005 (12) 0.0049 (13) 0.0330 (17)  
W58 0.092 (2) 0.091 (2) 0.0390 (14) -0.0067 (14) 0.0039 (15) 0.0448 (19)  
W59 0.0886 (19) 0.0704 (18) 0.0321 (11) 0.0071 (11) 0.0029 (12) 0.0517 (15)  
W60 0.063 (2) 0.114 (3) 0.0617 (18) 0.0183 (18) 0.0066 (15) 0.0253 (19)  
W61 0.0555 (13) 0.0321 (11) 0.0134 (8) 0.0067 (7) 0.0023 (8) 0.0183 (9)  
W62 0.0575 (14) 0.0478 (14) 0.0416 (12) 0.0318 (10) 0.0236 (10) 0.0304 (11)  
W63 0.0626 (16) 0.0487 (15) 0.0743 (16) 0.0147 (12) 0.0261 (13) 0.0188 (12)  
W64 0.0548 (14) 0.0593 (15) 0.0392 (12) 0.0241 (11) 0.0171 (10) 0.0319 (12)  
W65 0.0750 (17) 0.096 (2) 0.0413 (13) 0.0423 (13) 0.0345 (12) 0.0552 (15)  
W66 0.090 (2) 0.100 (2) 0.104 (2) 0.085 (2) 0.0618 (18) 0.0515 (18)  
W67 0.093 (2) 0.066 (2) 0.178 (4) 0.075 (2) 0.062 (2) 0.0287 (17)  
W68 0.077 (2) 0.0451 (17) 0.145 (3) 0.0237 (17) 0.0231 (19) 0.0077 (14)  
W69 0.067 (2) 0.091 (2) 0.149 (3) 0.044 (2) 0.026 (2) 0.0035 (17)  
W70 0.084 (2) 0.110 (3) 0.167 (4) 0.087 (3) 0.068 (2) 0.026 (2)  
W71 0.0602 (18) 0.102 (2) 0.112 (2) 0.055 (2) 0.0441 (17) 0.0296 (16)  
W72 0.0717 (17) 0.0455 (15) 0.0699 (16) 0.0347 (12) 0.0297 (13) 0.0286 (12)  
W73 0.0582 (15) 0.0327 (14) 0.104 (2) 0.0272 (13) 0.0196 (14) 0.0097 (11)  
W74 0.0485 (13) 0.0271 (12) 0.0548 (13) 0.0050 (9) -0.0037 (10) 0.0054 (10)  
W75 0.0466 (12) 0.0270 (11) 0.0295 (10) -0.0010 (8) -0.0004 (9) 0.0069 (9)  
W76 0.0583 (14) 0.0558 (15) 0.0383 (11) -0.0183 (10) -0.0055 (10) 0.0152  
(11)  
W77 0.095 (2) 0.083 (2) 0.0311 (12) 0.0007 (12) 0.0074 (12) 0.0464 (16)  
W78 0.0886 (19) 0.0645 (18) 0.0626 (16) 0.0435 (14) 0.0337 (14) 0.0420 (15)  
W79 0.0826 (18) 0.0589 (16) 0.0425 (13) 0.0162 (11) 0.0074 (12) 0.0405 (14)  
W80 0.0541 (14) 0.0265 (12) 0.0613 (14) 0.0068 (10) 0.0026 (11) 0.0125 (10)  
W81 0.0494 (13) 0.0380 (12) 0.0373 (11) -0.0069 (9) -0.0040 (9) 0.0172 (10)

W82 0.105(4) 0.070(3) 0.051(2) 0.001(2) 0.016(2) 0.018(3)

\_geom\_special\_details

;

All esds (except the esd in the dihedral angle between two l.s. planes) are estimated using the full covariance matrix. The cell esds are taken into account individually in the estimation of esds in distances, angles and torsion angles; correlations between esds in cell parameters are only used when they are defined by crystal symmetry. An approximate (isotropic) treatment of cell esds is used for estimating esds involving l.s. planes.

;

loop\_

\_geom\_bond\_atom\_site\_label\_1  
\_geom\_bond\_atom\_site\_label\_2  
\_geom\_bond\_distance  
\_geom\_bond\_site\_symmetry\_2  
\_geom\_bond\_publ\_flag

O1 W1 1.71(3) . ?  
O2 W2 1.74(4) . ?  
O3 W3 1.66(3) . ?  
O4 W4 1.67(4) . ?  
O5 W5 1.72(4) . ?  
O5 Cs5 3.09(4) 1\_655 ?  
O6 W6 1.71(3) . ?  
O6 K5 3.05(3) 1\_655 ?  
O7 W7 1.72(3) . ?  
O8 W8 1.73(3) . ?  
O9 W9 1.72(3) . ?  
O10 W2 1.89(3) . ?  
O10 W1 1.92(3) . ?  
O11 W3 1.84(3) . ?  
O11 W2 2.01(3) . ?  
O11 K9 2.95(3) 1\_655 ?  
O12 W3 1.93(3) . ?  
O12 W1 1.94(3) . ?  
O13 W1 1.89(3) . ?  
O13 W7 2.03(3) . ?  
O13 Cs4 3.61(3) 2\_655 ?  
O14 W2 1.82(3) . ?  
O14 W6 2.10(3) . ?  
O14 K5 2.92(3) 1\_655 ?  
O15 W2 1.87(3) . ?  
O15 W5 2.06(3) . ?  
O15 K9 2.87(3) 1\_655 ?  
O15 K3 2.87(3) 1\_655 ?  
O16 W3 1.81(3) . ?  
O16 W4 2.14(3) . ?  
O16 K9 2.97(4) 1\_655 ?  
O17 W9 1.83(3) . ?  
O17 W3 2.04(3) . ?  
O18 W1 1.93(3) . ?  
O18 W8 1.97(3) . ?  
O18 Cs4 3.44(3) 2\_655 ?  
O19 W8 1.86(3) . ?  
O19 W7 1.95(3) . ?  
O19 Cs4 3.27(3) 2\_655 ?  
O20 W7 1.88(3) . ?

O20 W6 1.95 (3) . ?  
O21 W5 1.93 (3) . ?  
O21 W6 1.95 (3) . ?  
O21 Na4 2.86 (4) . ?  
O21 K3 3.41 (3) 1\_655 ?  
O22 W5 1.92 (3) . ?  
O22 W4 1.95 (3) . ?  
O22 K9 2.79 (3) 1\_655 ?  
O23 W9 1.94 (3) . ?  
O23 W4 1.95 (3) . ?  
O24 W9 1.86 (3) . ?  
O24 W8 1.97 (3) . ?  
O25 As1 1.81 (3) . ?  
O25 W3 2.28 (3) . ?  
O25 W4 2.30 (3) . ?  
O25 W9 2.34 (3) . ?  
O26 As1 1.80 (3) . ?  
O26 W6 2.25 (3) . ?  
O26 W5 2.34 (2) . ?  
O26 W2 2.38 (2) . ?  
O27 As1 1.79 (3) . ?  
O27 W1 2.29 (3) . ?  
O27 W7 2.31 (3) . ?  
O27 W8 2.45 (3) . ?  
O28 W7 1.84 (3) . ?  
O28 Tb1 2.24 (3) . ?  
O29 W6 1.80 (3) . ?  
O29 Tb1 2.36 (3) . ?  
O30 W5 1.74 (3) . ?  
O31 W4 1.74 (3) . ?  
O32 W9 1.92 (2) . ?  
O32 W10 1.93 (2) . ?  
O33 W8 1.79 (3) . ?  
O33 W10 2.07 (3) . ?  
O34 W10 1.75 (2) . ?  
O34 Tb1 2.34 (2) . ?  
O35 W10 1.76 (3) . ?  
O35 Tb2 2.25 (3) . ?  
O36 Tb1 2.35 (3) . ?  
O37 Tb1 2.46 (3) . ?  
O37 Cs2 3.08 (3) . ?  
O38 Tb1 2.48 (3) . ?  
O38 Cs4 3.35 (3) . ?  
O39 W11 1.77 (3) . ?  
O39 W10 2.16 (3) . ?  
O40 W12 1.88 (2) . ?  
O40 W10 1.93 (2) . ?  
O41 W12 1.88 (3) . ?  
O41 W11 1.96 (3) . ?  
O42 W16 1.93 (3) . ?  
O42 W11 1.95 (3) . ?  
O43 W15 1.86 (3) . ?  
O43 W16 1.96 (3) . ?  
O44 W14 1.88 (3) . ?  
O44 W15 1.94 (3) . ?  
O44 K4 3.39 (3) . ?  
O45 W14 1.90 (2) . ?  
O45 W13 1.93 (2) . ?  
O45 Cs1 3.29 (2) . ?  
O46 W12 1.93 (3) . ?  
O46 W13 1.97 (2) . ?  
O47 As2 1.83 (2) . ?  
O47 W18 2.24 (2) . ?  
O47 W12 2.27 (2) . ?

O47 W13 2.35(2) . ?  
O48 As2 1.82(3) . ?  
O48 W16 2.24(2) . ?  
O48 W17 2.36(2) . ?  
O48 W11 2.42(2) . ?  
O49 As2 1.80(2) . ?  
O49 W15 2.26(2) . ?  
O49 W19 2.35(2) . ?  
O49 W14 2.37(2) . ?  
O50 W11 1.70(3) . ?  
O50 Na15 2.90(4) 1\_565 ?  
O51 W16 1.70(4) . ?  
O52 W16 1.79(3) . ?  
O52 Tb2 2.33(3) . ?  
O53 W15 1.76(3) . ?  
O53 Tb2 2.39(3) . ?  
O53 K4 3.33(3) . ?  
O54 W15 1.74(3) . ?  
O54 Na5 2.84(4) . ?  
O55 W14 1.81(2) . ?  
O55 W20 2.12(2) . ?  
O55 K4 3.15(3) . ?  
O56 W14 1.77(3) . ?  
O56 Cs1 3.18(3) . ?  
O57 W20 1.90(2) . ?  
O57 W13 1.93(2) . ?  
O58 W13 1.70(3) . ?  
O58 Cs1 3.10(3) . ?  
O59 W12 1.70(3) . ?  
O60 W12 1.90(3) . ?  
O60 W18 1.96(3) . ?  
O61 W17 1.87(3) . ?  
O61 W11 1.99(3) . ?  
O61 K2 2.96(3) . ?  
O62 W17 1.85(3) . ?  
O62 W16 2.07(3) . ?  
O62 K8 3.06(3) . ?  
O63 W19 1.85(3) . ?  
O63 W15 2.06(3) . ?  
O64 W19 1.94(3) . ?  
O64 W14 2.01(3) . ?  
O65 W13 1.89(3) . ?  
O65 W18 1.98(3) . ?  
O66 W18 1.80(3) . ?  
O66 W19 2.05(3) . ?  
O66 Cs1 3.21(3) 2 ?  
O67 W19 1.85(3) . ?  
O67 W17 1.97(3) . ?  
O68 W18 1.81(3) . ?  
O68 W17 2.04(2) . ?  
O69 W19 1.72(3) . ?  
O69 Cs1 3.34(3) 2 ?  
O70 W18 1.70(3) . ?  
O70 Cs1 3.29(3) 2 ?  
O71 W17 1.70(3) . ?  
O71 K8 3.30(3) . ?  
O72 W20 1.73(2) . ?  
O72 Tb1 2.50(2) . ?  
O72 Cs2 3.71(2) . ?  
O73 W20 1.78(2) . ?  
O73 Tb2 2.29(2) . ?  
O74 Tb2 2.40(3) . ?  
O75 Tb2 2.55(5) . ?  
O76 Tb2 2.53(4) . ?

O76 Cs2 3.54 (4) . ?  
O77 W23 1.76 (3) . ?  
O77 Tb1 2.33 (3) . ?  
O78 W22 1.87 (3) . ?  
O78 W23 1.92 (3) . ?  
O78 Cs4 3.35 (3) . ?  
O79 W22 1.71 (3) . ?  
O79 Cs1 3.20 (3) . ?  
O80 W21 1.90 (3) . ?  
O80 W22 1.94 (2) . ?  
O81 W22 1.95 (2) . ?  
O81 W27 1.95 (3) . ?  
O82 W31 1.90 (3) . ?  
O82 W27 1.91 (3) . ?  
O83 W27 1.76 (3) . ?  
O84 W27 1.88 (3) . ?  
O84 W26 1.96 (3) . ?  
O85 W26 1.80 (2) . ?  
O85 W31 2.10 (3) . ?  
O86 W26 1.73 (3) . ?  
O86 K2 2.81 (3) 1\_545 ?  
O87 W25 1.94 (3) . ?  
O87 W26 1.97 (3) . ?  
O88 W25 1.75 (3) . ?  
O88 Tb3 2.40 (3) . ?  
O89 W25 1.77 (3) . ?  
O89 Na7 2.36 (4) . ?  
O90 W25 1.91 (2) . ?  
O90 W24 1.91 (3) . ?  
O91 W24 1.81 (3) . ?  
O91 Tb3 2.33 (3) . ?  
O91 Cs2 3.57 (3) . ?  
O92 W24 1.73 (3) . ?  
O93 W23 1.92 (3) . ?  
O93 W24 1.95 (3) . ?  
O93 Cs2 3.50 (3) . ?  
O94 W29 1.90 (3) . ?  
O94 W23 2.02 (2) . ?  
O94 Cs4 3.18 (2) . ?  
O95 W22 1.88 (3) . ?  
O95 W28 1.99 (3) . ?  
O95 Cs4 3.47 (3) . ?  
O96 W27 1.90 (3) . ?  
O96 W28 1.98 (3) . ?  
O97 W30 1.88 (2) . ?  
O97 W26 2.01 (2) . ?  
O98 W30 1.86 (2) . ?  
O98 W25 2.07 (3) . ?  
O99 W29 1.85 (3) . ?  
O99 W24 2.05 (3) . ?  
O101 As3 1.83 (2) . ?  
O101 W28 2.25 (2) . ?  
O101 W22 2.31 (2) . ?  
O101 W27 2.32 (2) . ?  
O102 As3 1.83 (3) . ?  
O102 W24 2.28 (3) . ?  
O102 W23 2.33 (3) . ?  
O102 W29 2.36 (3) . ?  
O103 W28 1.85 (3) . ?  
O103 W30 1.97 (3) . ?  
O103 K7 3.33 (3) . ?  
O104 W28 1.85 (3) . ?  
O104 W29 2.00 (3) . ?  
O104 Cs4 3.36 (3) . ?

O105 W30 1.90(3) . ?  
O105 W29 1.93(3) . ?  
O106 W30 1.74(3) . ?  
O106 K7 3.24(3) 2\_645 ?  
O106 K7 3.30(3) . ?  
O107 W28 1.74(3) . ?  
O107 K7 3.22(3) . ?  
O108 W29 1.71(3) . ?  
O109 W21 1.90(2) . ?  
O109 W20 1.98(2) . ?  
O109 K4 3.03(3) . ?  
O109 Cs2 3.14(2) . ?  
O110 W20 2.12(2) . ?  
O110 W21 2.19(2) . ?  
O110 Cs1 3.68(2) . ?  
O111 W21 1.77(3) . ?  
O111 Tb3 2.35(3) . ?  
O111 Cs2 3.73(3) . ?  
O112 Tb3 2.41(3) . ?  
O112 Cs3 3.64(3) . ?  
O113 W43 1.74(2) . ?  
O113 Tb3 2.45(2) . ?  
O113 Cs2 3.09(2) . ?  
O114 W31 1.77(2) . ?  
O114 Tb3 2.27(2) . ?  
O115 W41 1.76(3) . ?  
O115 Tb3 2.36(3) . ?  
O115 Cs3 3.35(3) . ?  
O116 Tb4 2.42(3) . ?  
O116 K4 2.91(3) . ?  
O117 W31 1.80(2) . ?  
O117 Tb4 2.22(2) . ?  
O118 W41 1.72(2) . ?  
O118 Tb4 2.37(2) . ?  
O119 W33 1.89(3) . ?  
O119 W32 1.94(3) . ?  
O119 K8 3.21(3) 1\_545 ?  
O120 W21 1.76(3) . ?  
O120 Tb4 2.38(3) . ?  
O121 Tb4 2.52(3) . ?  
O121 Na11 2.78(4) . ?  
O121 Cs1 3.22(3) . ?  
O122 Tb4 2.41(3) . ?  
O122 K5 3.11(3) . ?  
O123 W36 1.76(2) . ?  
O123 Tb4 2.34(3) . ?  
O124 W37 1.79(3) . ?  
O124 Tb4 2.33(3) . ?  
O125 W32 1.83(2) . ?  
O125 W31 2.07(2) . ?  
O126 W31 1.91(3) . ?  
O126 W33 1.92(3) . ?  
O127 W41 1.93(3) . ?  
O127 W34 1.94(3) . ?  
O127 Cs3 3.67(3) . ?  
O128 W35 1.81(2) . ?  
O128 W41 2.14(2) . ?  
O129 W35 1.74(3) . ?  
O129 Cs5 3.08(3) . ?  
O129 K1 3.27(3) . ?  
O130 W34 1.88(3) . ?  
O130 W35 1.95(3) . ?  
O131 W34 1.68(3) . ?  
O131 Na1 2.96(4) . ?

O131 Cs3 2.99(3) . ?  
O132 W34 1.91(3) . ?  
O132 W33 1.95(3) . ?  
O133 W33 1.73(3) . ?  
O134 W53 1.90(3) . ?  
O134 W52 1.96(3) . ?  
O134 K12 2.07(4) . ?  
O134 Cs6 3.44(3) 1\_565 ?  
O135 W32 1.73(3) . ?  
O135 K2 2.95(4) 1\_545 ?  
O136 W32 1.91(3) . ?  
O136 W37 2.01(3) . ?  
O137 W37 1.75(3) . ?  
O138 W37 1.86(3) . ?  
O138 W36 2.00(3) . ?  
O139 W36 1.71(3) . ?  
O139 Na4 2.75(4) 1\_455 ?  
O139 K5 2.87(3) . ?  
O139 K3 3.02(3) . ?  
O140 W35 1.92(3) . ?  
O140 W36 1.94(3) . ?  
O140 K3 3.07(3) . ?  
O140 Cs5 3.32(3) . ?  
O141 As4 1.82(3) . ?  
O141 W36 2.25(3) . ?  
O141 W39 2.34(2) . ?  
O141 W35 2.37(3) . ?  
O142 As4 1.76(3) . ?  
O142 W40 2.27(3) . ?  
O142 W33 2.33(3) . ?  
O142 W34 2.38(3) . ?  
O143 As4 1.79(3) . ?  
O143 W37 2.27(3) . ?  
O143 W38 2.37(3) . ?  
O143 W32 2.45(3) . ?  
O144 W38 1.91(4) . ?  
O144 W32 1.97(3) . ?  
O144 K8 3.14(4) 1\_545 ?  
O145 W38 1.88(3) . ?  
O145 W37 2.06(3) . ?  
O146 W39 1.85(3) . ?  
O146 W36 2.09(3) . ?  
O146 Na4 2.94(4) 1\_455 ?  
O147 W39 1.88(3) . ?  
O147 W35 2.02(3) . ?  
O148 W34 1.88(3) . ?  
O148 W40 2.01(3) . ?  
O149 W33 1.91(3) . ?  
O149 W40 1.99(3) . ?  
O149 K8 3.36(3) 1\_545 ?  
O150 W40 1.88(3) . ?  
O150 W38 1.97(3) . ?  
O150 K8 3.22(3) 1\_545 ?  
O151 W39 1.88(3) . ?  
O151 W38 1.96(3) . ?  
O152 W40 1.82(3) . ?  
O152 W39 2.03(3) . ?  
O153 W40 1.65(4) . ?  
O154 W39 1.71(3) . ?  
O155 W38 1.63(4) . ?  
O156 Tb3 2.52(3) . ?  
O156 Cs3 3.10(3) . ?  
O157 W23 1.78(2) . ?  
O157 W21 2.17(2) . ?



O157 Cs2 3.22(2) . ?  
O158 W42 1.74(3) . ?  
O158 Tb2 2.43(3) . ?  
O158 K4 2.96(3) . ?  
O159 W42 1.71(3) . ?  
O159 Tb5 2.44(3) . ?  
O159 K4 3.37(3) . ?  
O160 W42 1.90(3) . ?  
O160 W43 1.95(2) . ?  
O160 Cs2 3.26(2) . ?  
O161 W43 1.71(3) . ?  
O161 Tb5 2.40(3) . ?  
O161 Cs3 3.58(3) . ?  
O162 W44 1.95(3) . ?  
O162 W43 1.95(3) . ?  
O162 Cs3 3.21(3) . ?  
O163 W44 1.84(3) . ?  
O163 W61 2.14(3) . ?  
O163 Cs3 3.02(3) . ?  
O164 W44 1.74(3) . ?  
O165 W44 1.85(3) . ?  
O165 W45 1.95(3) . ?  
O166 W45 1.88(3) . ?  
O166 W61 1.98(3) . ?  
O167 W45 1.70(3) . ?  
O167 Na14 2.92(5) . ?  
O168 W45 1.91(4) . ?  
O168 W46 1.93(4) . ?  
O169 W61 1.77(3) . ?  
O169 Tb6 2.33(3) . ?  
O169 Na16 2.92(4) 2\_546 ?  
O170 W46 1.87(4) . ?  
O170 W47 1.94(4) . ?  
O171 W47 1.76(3) . ?  
O171 W51 2.16(3) . ?  
O172 W47 1.69(4) . ?  
O172 Cs6 3.01(4) 1\_565 ?  
O173 W47 1.93(3) . ?  
O173 W42 1.96(3) . ?  
O174 As5 1.80(3) . ?  
O174 W50 2.31(3) . ?  
O174 W46 2.31(3) . ?  
O174 W45 2.32(3) . ?  
O175 As5 1.79(3) . ?  
O175 W43 2.23(3) . ?  
O175 W44 2.36(3) . ?  
O175 W49 2.39(3) . ?  
O176 As5 1.84(3) . ?  
O176 W42 2.22(3) . ?  
O176 W48 2.37(3) . ?  
O176 W47 2.48(3) . ?  
O177 W48 1.80(4) . ?  
O177 W47 2.06(3) . ?  
O178 W48 1.86(3) . ?  
O178 W42 2.10(3) . ?  
O179 W49 1.88(3) . ?  
O179 W43 2.03(3) . ?  
O179 Cs2 3.61(3) . ?  
O180 W49 1.85(3) . ?  
O180 W44 2.04(3) . ?  
O181 W45 1.91(4) . ?  
O181 W50 1.97(4) . ?  
O182 W46 1.92(4) . ?  
O182 W50 1.93(4) . ?

O183 W50 1.87(3) . ?  
O183 W49 1.99(3) . ?  
O184 W49 1.89(3) . ?  
O184 W48 1.91(3) . ?  
O185 W50 1.85(3) . ?  
O185 W48 1.96(3) . ?  
O186 W50 1.73(4) . ?  
O186 Na6 2.99(6) 1\_565 ?  
O187 W49 1.73(3) . ?  
O188 W48 1.73(4) . ?  
O189 Tb5 2.53(3) . ?  
O189 Na5 2.82(4) . ?  
O190 W61 1.74(2) . ?  
O190 Tb5 2.38(2) . ?  
O191 Tb5 2.44(3) . ?  
O192 W41 2.10(2) . ?  
O192 Tb5 2.35(3) . ?  
O192 Na1 2.84(4) . ?  
O192 Cs3 2.99(3) . ?  
O193 W51 1.74(3) . ?  
O193 Tb5 2.30(3) . ?  
O194 W41 1.95(3) . ?  
O194 Tb5 2.31(2) . ?  
O194 K4 2.95(3) . ?  
O195 W51 1.71(3) . ?  
O195 Tb6 2.34(3) . ?  
O196 W46 1.89(3) . ?  
O196 W51 1.97(3) . ?  
O197 W51 1.88(3) . ?  
O197 W53 1.95(4) . ?  
O198 W52 1.82(4) . ?  
O198 W51 2.06(4) . ?  
O198 K12 2.20(4) . ?  
O199 W52 1.77(4) . ?  
O199 K12 2.71(4) . ?  
O199 K6 3.24(4) 1\_565 ?  
O199 Cs6 3.40(4) 1\_565 ?  
O200 K12 1.82(4) . ?  
O200 W52 1.92(3) . ?  
O200 W57 1.92(3) . ?  
O200 Cs8 2.99(3) . ?  
O201 W57 1.80(4) . ?  
O201 Cs8 2.08(4) . ?  
O201 Tb6 2.32(4) . ?  
O201 K12 3.36(4) . ?  
O202 W57 1.76(4) . ?  
O202 Cs8 2.24(4) . ?  
O203 Cs8 1.11(4) . ?  
O203 W56 1.86(5) . ?  
O203 W57 2.22(5) . ?  
O203 Cs7 3.37(5) . ?  
O204 W56 1.77(4) . ?  
O204 Tb6 2.32(4) . ?  
O204 Cs8 2.97(4) . ?  
O205 W56 1.74(5) . ?  
O205 Na9 2.43(5) 2\_546 ?  
O205 Cs8 3.62(5) . ?  
O206 K11 1.38(5) . ?  
O206 W55 1.90(5) . ?  
O206 W60 2.18(5) . ?  
O206 Na10 2.26(6) . ?  
O207 Na4 2.61(10) 1\_455 ?  
O207 Cs5 2.95(10) . ?  
O208 W55 1.77(4) . ?

O208 Na10 2.21(5) . ?  
O208 K1 3.25(4) . ?  
O208 Cs5 3.80(4) . ?  
O209 W54 1.89(4) . ?  
O209 W55 1.93(4) . ?  
O209 Na10 2.42(5) . ?  
O209 Cs5 3.49(4) . ?  
O210 W54 1.75(4) . ?  
O210 K3 2.92(4) . ?  
O210 K9 2.94(4) . ?  
O210 Cs5 3.22(4) . ?  
O211 W54 1.78(3) . ?  
O211 Cs5 3.71(3) . ?  
O212 W54 1.93(3) . ?  
O212 W53 1.93(3) . ?  
O213 W53 1.73(3) . ?  
O213 Na5 2.92(4) . ?  
O213 Cs6 3.36(4) 1\_565 ?  
O214 As6 1.75(3) . ?  
O214 W53 2.30(3) . ?  
O214 W59 2.34(3) . ?  
O214 W54 2.38(3) . ?  
O214 K12 3.40(4) . ?  
O214 Cs7 3.77(3) . ?  
O215 K12 1.55(4) . ?  
O215 As6 1.80(4) . ?  
O215 W57 2.25(4) . ?  
O215 W58 2.36(4) . ?  
O215 Cs8 2.38(4) . ?  
O215 W52 2.53(4) . ?  
O215 Cs7 2.61(4) . ?  
O216 As6 1.75(4) . ?  
O216 W56 2.28(4) . ?  
O216 W55 2.35(4) . ?  
O216 W60 2.39(4) . ?  
O216 K11 2.75(4) . ?  
O216 Cs8 3.21(4) . ?  
O216 Cs7 3.30(4) . ?  
O217 K12 1.79(4) . ?  
O217 W58 1.93(4) . ?  
O217 W52 2.00(4) . ?  
O217 Cs7 3.17(4) . ?  
O218 W59 1.88(4) . ?  
O218 W54 2.07(4) . ?  
O218 K9 2.73(4) . ?  
O219 W53 1.90(4) . ?  
O219 W59 2.01(3) . ?  
O220 W56 1.903(4) . ?  
O220 W55 2.046(3) . ?  
O220 Na10 2.48(3) . ?  
O220 K11 3.098(14) . ?  
O221 W58 1.85(4) . ?  
O221 W57 2.06(4) . ?  
O221 Cs7 2.25(4) . ?  
O221 Cs8 2.26(4) . ?  
O221 K12 2.88(4) . ?  
O222 W60 1.83(4) . ?  
O222 W56 2.02(4) . ?  
O222 K11 2.02(4) . ?  
O222 Cs7 3.30(4) . ?  
O222 Cs8 3.40(4) . ?  
O224 W58 1.93(3) . ?  
O224 W59 1.98(3) . ?  
O224 Cs7 2.17(4) . ?

O224 K12 3.19(4) . ?  
O225 W59 1.83(4) . ?  
O225 W60 1.95(4) . ?  
O225 K11 2.42(4) . ?  
O225 Cs7 2.84(4) . ?  
O226 W59 1.73(4) . ?  
O226 Na2 2.33(5) 1\_465 ?  
O227 W58 1.70(5) . ?  
O227 Cs7 2.21(5) . ?  
O228 K11 1.80(5) . ?  
O228 W60 1.81(5) . ?  
O228 Na8 2.90(5) 1\_465 ?  
O228 Cs7 3.50(5) . ?  
O229 Tb6 2.35(3) . ?  
O229 K1 3.20(3) . ?  
O230 Tb6 2.41(4) . ?  
O231 W64 1.77(4) . ?  
O231 Tb6 2.42(4) . ?  
O232 Tb6 2.48(3) . ?  
O232 Na16 2.78(5) 2\_546 ?  
O233 W63 1.92(3) . ?  
O233 W62 1.93(3) . ?  
O234 W64 1.83(3) . ?  
O234 W62 2.15(3) . ?  
O235 W65 1.94(4) . ?  
O235 W64 1.95(4) . ?  
O236 W65 1.77(4) . ?  
O236 Tb7 2.34(4) . ?  
O237 W65 1.78(4) . ?  
O237 Tb7 2.27(4) 2\_546 ?  
O238 W65 1.91(4) . ?  
O238 W66 1.92(4) . ?  
O239 W66 1.74(4) . ?  
O239 Tb7 2.37(4) . ?  
O240 W66 1.74(5) . ?  
O240 Na16 2.17(6) . ?  
O241 W67 1.98(5) . ?  
O241 W66 1.99(5) . ?  
O242 W67 1.78(4) . ?  
O242 W72 2.10(4) . ?  
O243 W67 1.69(7) . ?  
O244 W67 1.88(5) . ?  
O244 W68 1.93(5) . ?  
O245 W68 1.84(4) . ?  
O245 W72 1.98(4) . ?  
O246 W68 1.77(5) . ?  
O246 Cs6 3.31(5) . ?  
O247 W68 1.95(4) . ?  
O247 W63 1.97(4) . ?  
O248 W63 1.65(4) . ?  
O248 Na1 2.91(5) . ?  
O249 W71 1.86(4) . ?  
O249 W64 2.03(4) . ?  
O250 W71 1.93(4) . ?  
O250 W65 2.05(4) . ?  
O251 W70 1.83(6) . ?  
O251 W66 2.09(6) . ?  
O252 W70 1.83(7) . ?  
O252 W67 1.97(6) . ?  
O253 W68 1.88(4) . ?  
O253 W69 1.98(5) . ?  
O254 W63 1.89(4) . ?  
O254 W69 1.90(4) . ?  
O255 W69 1.76(5) . ?

O255 W71 2.10 (5) . ?  
O256 W71 1.85 (5) . ?  
O256 W70 1.96 (5) . ?  
O257 W69 1.83 (5) . ?  
O257 W70 1.97 (4) . ?  
O258 W70 1.70 (5) . ?  
O259 W71 1.61 (6) . ?  
O260 W69 1.61 (6) . ?  
O261 W72 1.80 (3) . ?  
O261 Tb7 2.21 (3) . ?  
O262 W62 1.78 (3) . ?  
O262 Tb7 2.31 (3) . ?  
O263 Tb7 2.45 (4) . ?  
O263 Na16 2.58 (5) 2\_546 ?  
O263 Na14 2.78 (5) . ?  
O264 Tb7 2.52 (5) . ?  
O265 W82 1.79 (3) . ?  
O265 Tb7 2.37 (3) . ?  
O267 W82 2.32 (8) . ?  
O268 W77 1.83 (4) . ?  
O268 W82 1.95 (4) . ?  
O269 W77 1.77 (4) . ?  
O269 Na9 2.41 (4) . ?  
O270 W77 1.84 (3) . ?  
O270 W76 1.95 (3) . ?  
O271 W76 1.83 (4) . ?  
O271 W82 2.14 (4) . ?  
O272 W82 1.86 (4) . ?  
O272 Tb8 2.36 (4) . ?  
O273 W76 1.71 (4) . ?  
O274 W76 1.89 (3) . ?  
O274 W75 1.97 (3) . ?  
O275 W75 1.77 (3) . ?  
O275 Tb8 2.38 (3) . ?  
O276 W75 1.73 (3) . ?  
O276 Na7 2.40 (4) . ?  
O277 W74 1.91 (2) . ?  
O277 W75 1.94 (3) . ?  
O278 W74 1.79 (3) . ?  
O278 Tb8 2.33 (3) . ?  
O279 W74 1.74 (4) . ?  
O280 W74 1.96 (3) . ?  
O280 W73 1.98 (3) . ?  
O281 W73 1.80 (3) . ?  
O281 W72 2.09 (3) . ?  
O282 W73 1.67 (4) . ?  
O282 K6 2.94 (5) . ?  
O282 Cs6 3.38 (4) . ?  
O283 W73 1.88 (4) . ?  
O283 W78 1.94 (4) . ?  
O284 W72 1.88 (4) . ?  
O284 W78 1.96 (4) . ?  
O285 W78 1.74 (4) . ?  
O286 W77 1.93 (3) . ?  
O286 W78 1.95 (3) . ?  
O287 As8 1.79 (3) . ?  
O287 W77 2.30 (3) . ?  
O287 W78 2.31 (3) . ?  
O287 W79 2.32 (4) . ?  
O288 As8 1.81 (3) . ?  
O288 W75 2.24 (3) . ?  
O288 W81 2.35 (3) . ?  
O288 W76 2.40 (3) . ?  
O289 As8 1.76 (3) . ?

O289 W74 2.28(3) . ?  
O289 W80 2.37(3) . ?  
O289 W73 2.46(3) . ?  
O290 W80 1.83(3) . ?  
O290 W74 2.10(3) . ?  
O291 W80 1.88(4) . ?  
O291 W73 1.99(4) . ?  
O292 W78 1.94(4) . ?  
O292 W79 1.99(3) . ?  
O293 W79 1.88(4) . ?  
O293 W77 2.06(4) . ?  
O294 W81 1.80(3) . ?  
O294 W75 2.08(3) . ?  
O295 W81 1.87(3) . ?  
O295 W76 2.04(4) . ?  
O296 W81 1.90(3) . ?  
O296 W80 1.93(3) . ?  
O297 W79 1.84(3) . ?  
O297 W81 1.99(3) . ?  
O298 W80 1.88(3) . ?  
O298 W79 1.95(3) . ?  
O299 W79 1.70(4) . ?  
O300 W81 1.71(3) . ?  
O300 Na2 2.32(4) . ?  
O301 W80 1.75(3) . ?  
O301 Na6 2.86(6) . ?  
O302 W72 1.79(3) . ?  
O302 Tb8 2.25(3) . ?  
O303 Tb8 2.42(3) . ?  
O304 Tb8 2.45(4) . ?  
O304 Cs3 3.01(4) . ?  
O305 Tb8 2.40(4) . ?  
O305 Cs3 3.45(4) . ?  
O306 W62 1.77(4) . ?  
O306 Tb8 2.39(4) . ?  
O306 Cs3 3.20(4) . ?  
O307 W61 1.90(3) . ?  
O307 W62 2.07(3) . ?  
O307 Na1 2.75(4) . ?  
O307 Cs3 3.18(3) . ?  
O308 W62 1.99(3) . ?  
O308 W61 2.13(3) . ?  
O308 Na16 2.95(4) 2\_546 ?  
O309 W63 1.87(4) . ?  
O309 W64 1.97(4) . ?  
O309 K1 3.38(4) . ?  
O310 K8 3.39(7) . ?  
O313 Cs6 3.38(6) 1\_565 ?  
O314 Cs8 3.28(4) . ?  
O314 Cs7 3.29(4) . ?  
O317 K11 3.22(6) . ?  
O319 Na11 2.41(5) . ?  
O320 K5 2.86(3) . ?  
O321 K5 2.86(3) . ?  
O324 Cs1 3.359(3) 2 ?  
O324 Cs1 3.359(3) . ?  
O326 Na11 2.90(6) . ?  
O326 Cs1 3.51(6) . ?  
O327 Na11 3.01(8) . ?  
O328 K8 3.30(7) 2 ?  
O331 Na9 2.64(9) . ?  
O332 K1 2.78(7) . ?  
O333 Na5 2.98(8) . ?  
O334 K2 2.78(4) 2 ?

O337 K2 2.88(5) 1\_545 ?  
O337 K8 2.99(5) 1\_545 ?  
O340 Na10 2.63(8) 1\_655 ?  
O341 Na6 2.59(6) . ?  
O343 Na13 2.00(6) . ?  
O345 Na2 2.57(6) . ?  
O346 K5 2.94(5) . ?  
O346 K3 3.40(5) . ?  
O347 Na2 2.36(6) . ?  
O348 Na2 2.43(7) . ?  
O348 K9 2.88(7) 1\_645 ?  
O349 Na7 2.33(5) . ?  
O350 Na7 2.55(5) . ?  
O351 Na7 2.42(6) . ?  
O351 Na15 2.80(7) . ?  
O358 K9 2.87(6) 1\_655 ?  
O359 Cs2 3.29(7) . ?  
O360 K1 2.61(9) . ?  
O361 As7 1.85(4) . ?  
O361 W65 2.25(4) . ?  
O361 W64 2.32(4) . ?  
O361 W71 2.33(4) . ?  
O362 As7 1.80(4) . ?  
O362 W66 2.37(4) . ?  
O362 W70 2.37(4) . ?  
O362 W67 2.39(4) . ?  
O363 As7 1.85(4) . ?  
O363 W69 2.27(3) . ?  
O363 W68 2.27(4) . ?  
O363 W63 2.30(4) . ?  
O366 Na4 2.66(5) . ?  
O367 Na4 2.86(5) . ?  
O368 Na4 2.78(8) . ?  
O373 W46 1.74(3) . ?  
O375 Na2 2.51(5) . ?  
O377 K3 2.83(3) . ?  
O378 Cs2 3.70(5) . ?  
O379 Na15 1.80(4) . ?  
O384 Na7 2.36(4) . ?  
O386 Na12 3.00(7) . ?  
O387 Na15 2.31(6) 2\_545 ?  
O389 As3 1.81(3) . ?  
O389 W25 2.21(2) . ?  
O389 W30 2.39(3) . ?  
O389 W26 2.45(2) . ?  
O390 K3 2.06(6) . ?  
O391 K5 2.81(3) . ?  
O392 Cs4 3.09(6) . ?  
O393 Na9 2.41(7) 2\_546 ?  
O393 Cs8 3.28(7) . ?  
Na15 O387 2.31(6) 2\_545 ?  
Na15 O50 2.90(4) 1\_545 ?  
Na16 O263 2.58(5) 2\_546 ?  
Na16 O232 2.78(5) 2\_546 ?  
Na16 O169 2.92(4) 2\_546 ?  
Na16 O308 2.95(4) 2\_546 ?  
Na16 W66 3.67(3) . ?  
Na16 Tb6 3.91(3) 2\_546 ?  
Na13 Cs7 3.45(3) 1\_645 ?  
Na12 Cs8 4.92(3) . ?  
Na11 Cs1 4.42(4) . ?  
Na10 W55 1.13(3) . ?  
Na10 O340 2.63(8) 1\_455 ?  
Na10 Cs5 3.53(3) . ?

Na10 K11 3.57(3) . ?  
Na10 K1 4.49(3) . ?  
Na6 Na8 1.63(5) . ?  
Na6 O186 2.99(6) 1\_545 ?  
Na6 K11 4.05(5) 1\_645 ?  
Na8 O228 2.90(5) 1\_645 ?  
Na8 K11 4.27(2) 1\_645 ?  
Na9 O393 2.41(7) 2\_546 ?  
Na9 O205 2.43(5) 2\_546 ?  
Na5 K4 4.00(3) . ?  
Na4 O207 2.61(10) 1\_655 ?  
Na4 O139 2.75(4) 1\_655 ?  
Na4 O146 2.94(4) 1\_655 ?  
Na4 K3 4.31(3) 1\_655 ?  
Na4 Cs5 4.96(2) 1\_655 ?  
Na2 O226 2.33(5) 1\_645 ?  
Na2 K9 4.51(3) 1\_645 ?  
Na1 K1 3.01(3) . ?  
Na1 Cs3 4.05(3) . ?  
K1 Cs5 4.940(11) . ?  
K4 W42 3.879(11) . ?  
K4 W20 4.064(11) . ?  
K4 W14 4.118(11) . ?  
K5 O14 2.92(3) 1\_455 ?  
K5 O6 3.05(3) 1\_455 ?  
K5 W6 3.920(12) 1\_455 ?  
K5 W36 4.129(11) . ?  
K5 K3 4.240(19) . ?  
K6 O199 3.24(4) 1\_545 ?  
K6 W73 4.105(12) . ?  
K6 Cs6 4.702(17) . ?  
K7 K7 2.60(3) 2\_645 ?  
K7 O106 3.24(3) 2\_645 ?  
K7 W30 4.073(12) 2\_645 ?  
K7 W28 4.100(12) . ?  
K8 O337 2.99(5) 1\_565 ?  
K8 O144 3.14(4) 1\_565 ?  
K8 O119 3.21(3) 1\_565 ?  
K8 O150 3.22(3) 1\_565 ?  
K8 O328 3.30(6) 2 ?  
K8 O149 3.36(3) 1\_565 ?  
K8 W17 4.007(12) . ?  
K8 W38 4.105(12) 1\_565 ?  
K9 O22 2.79(3) 1\_455 ?  
K9 O15 2.87(3) 1\_455 ?  
K9 O358 2.87(6) 1\_455 ?  
K9 O348 2.88(7) 1\_465 ?  
K9 O11 2.95(3) 1\_455 ?  
K9 O16 2.97(4) 1\_455 ?  
K9 W54 3.788(12) . ?  
K9 W5 3.789(13) 1\_455 ?  
K9 W3 3.802(12) 1\_455 ?  
K9 W2 3.903(13) 1\_455 ?  
K11 W60 1.060(11) . ?  
K11 W55 3.026(15) . ?  
K11 W56 3.535(13) . ?  
K11 Cs7 3.60(2) . ?  
K2 O334 2.78(4) 2 ?  
K2 O86 2.81(3) 1\_565 ?  
K2 O337 2.88(5) 1\_565 ?  
K2 O135 2.95(4) 1\_565 ?  
K2 W26 4.125(15) 1\_565 ?  
K3 O15 2.87(4) 1\_455 ?  
K3 Cs5 2.902(18) . ?



K3 O21 3.41(3) 1\_455 ?  
K3 W36 3.870(15) . ?  
K3 W5 3.904(14) 1\_455 ?  
K3 W2 3.986(16) 1\_455 ?  
K12 W52 1.011(13) . ?  
K12 W58 2.597(18) . ?  
K12 W57 2.715(19) . ?  
K12 As6 2.992(18) . ?  
As6 Cs8 3.258(13) . ?  
As6 Cs7 3.655(13) . ?  
Cs7 W58 1.271(16) . ?  
Cs7 W60 2.542(18) . ?  
Cs7 Cs8 3.35(2) . ?  
Cs8 W57 1.117(13) . ?  
Cs8 W56 2.690(15) . ?  
Cs1 O66 3.21(3) 2 ?  
Cs1 O70 3.29(3) 2 ?  
Cs1 O69 3.34(3) 2 ?  
Cs1 W13 4.036(3) . ?  
Cs5 O5 3.09(4) 1\_455 ?  
Cs5 W54 3.912(9) . ?  
Cs5 W35 4.002(7) . ?  
Cs6 O172 3.01(4) 1\_545 ?  
Cs6 O213 3.36(4) 1\_545 ?  
Cs6 O313 3.38(6) 1\_545 ?  
Cs6 O199 3.40(4) 1\_545 ?  
Cs6 O134 3.44(3) 1\_545 ?  
Cs6 W52 4.216(10) 1\_545 ?  
Cs6 W53 4.246(9) 1\_545 ?  
Cs6 W47 4.474(9) 1\_545 ?  
Cs6 K12 4.932(19) 1\_545 ?  
Cs4 O19 3.27(3) 2\_655 ?  
Cs4 O18 3.44(3) 2\_655 ?  
Cs4 O13 3.61(3) 2\_655 ?  
Cs4 W8 4.125(7) 2\_655 ?  
Cs4 W23 4.163(7) . ?  
Cs4 W29 4.262(8) . ?  
Tb5 W41 3.571(3) . ?  
Tb6 Na16 3.91(3) 2\_546 ?  
Tb7 O237 2.27(4) 2\_546 ?  
W1 Cs4 4.409(7) 2\_655 ?  
W2 K9 3.903(13) 1\_655 ?  
W2 K3 3.986(16) 1\_655 ?  
W3 K9 3.802(12) 1\_655 ?  
W4 K9 3.972(13) 1\_655 ?  
W5 K9 3.789(13) 1\_655 ?  
W5 K3 3.904(14) 1\_655 ?  
W6 K5 3.920(12) 1\_655 ?  
W7 Cs4 4.409(7) 2\_655 ?  
W8 Cs4 4.125(7) 2\_655 ?  
W18 Cs1 4.038(3) 2 ?  
W19 Cs1 4.141(3) 2 ?  
W26 K2 4.125(15) 1\_545 ?  
W30 K7 4.073(12) 2\_645 ?  
W38 K8 4.105(12) 1\_545 ?  
W47 Cs6 4.474(9) 1\_565 ?  
W52 Cs6 4.216(10) 1\_565 ?  
W53 Cs6 4.246(9) 1\_565 ?  
W61 W62 3.213(3) . ?

loop\_  
\_geom\_angle\_atom\_site\_label\_1  
\_geom\_angle\_atom\_site\_label\_2  
\_geom\_angle\_atom\_site\_label\_3

\_geom\_angle  
\_geom\_angle\_site\_symmetry\_1  
\_geom\_angle\_site\_symmetry\_3  
\_geom\_angle\_publ\_flag  
W5 O5 Cs5 144.2(17) . 1\_655 ?  
W6 O6 K5 107.4(13) . 1\_655 ?  
W2 O10 W1 157.5(16) . . ?  
W3 O11 W2 150.6(16) . . ?  
W3 O11 K9 102.8(12) . 1\_655 ?  
W2 O11 K9 102.3(11) . 1\_655 ?  
W3 O12 W1 147.1(16) . . ?  
W1 O13 W7 120.2(14) . . ?  
W1 O13 Cs4 102.0(11) . 2\_655 ?  
W7 O13 Cs4 99.1(10) . 2\_655 ?  
W2 O14 W6 118.7(15) . . ?  
W2 O14 K5 138.5(14) . 1\_655 ?  
W6 O14 K5 101.2(11) . 1\_655 ?  
W2 O15 W5 121.6(16) . . ?  
W2 O15 K9 109.3(13) . 1\_655 ?  
W5 O15 K9 99.4(11) . 1\_655 ?  
W2 O15 K3 112.8(13) . 1\_655 ?  
W5 O15 K3 103.6(12) . 1\_655 ?  
K9 O15 K3 109.0(11) 1\_655 1\_655 ?  
W3 O16 W4 121.2(16) . . ?  
W3 O16 K9 102.7(13) . 1\_655 ?  
W4 O16 K9 101.0(12) . 1\_655 ?  
W9 O17 W3 120.0(18) . . ?  
W1 O18 W8 121.1(16) . . ?  
W1 O18 Cs4 107.2(12) . 2\_655 ?  
W8 O18 Cs4 95.6(11) . 2\_655 ?  
W8 O19 W7 123.2(13) . . ?  
W8 O19 Cs4 103.6(10) . 2\_655 ?  
W7 O19 Cs4 112.7(10) . 2\_655 ?  
W7 O20 W6 146.2(16) . . ?  
W5 O21 W6 118.9(14) . . ?  
W5 O21 Na4 132.5(13) . . ?  
W6 O21 Na4 101.5(11) . . ?  
W5 O21 K3 89.4(9) . 1\_655 ?  
W6 O21 K3 125.3(11) . 1\_655 ?  
Na4 O21 K3 86.4(9) . 1\_655 ?  
W5 O22 W4 141.0(16) . . ?  
W5 O22 K9 105.9(13) . 1\_655 ?  
W4 O22 K9 112.7(13) . 1\_655 ?  
W9 O23 W4 120.2(16) . . ?  
W9 O24 W8 148.2(15) . . ?  
As1 O25 W3 134.8(14) . . ?  
As1 O25 W4 113.3(13) . . ?  
W3 O25 W4 97.7(10) . . ?  
As1 O25 W9 115.6(13) . . ?  
W3 O25 W9 93.3(10) . . ?  
W4 O25 W9 93.5(10) . . ?  
As1 O26 W6 116.9(12) . . ?  
As1 O26 W5 118.7(12) . . ?  
W6 O26 W5 93.3(10) . . ?  
As1 O26 W2 132.4(13) . . ?  
W6 O26 W2 93.7(9) . . ?  
W5 O26 W2 92.9(9) . . ?  
As1 O27 W1 135.1(14) . . ?  
As1 O27 W7 114.1(13) . . ?  
W1 O27 W7 95.4(9) . . ?  
As1 O27 W8 120.2(13) . . ?  
W1 O27 W8 91.4(9) . . ?  
W7 O27 W8 89.7(9) . . ?  
W7 O28 Tb1 161.3(15) . . ?

W6 O29 Tb1 154.3(15) . . ?  
W9 O32 W10 150.9(14) . . ?  
W8 O33 W10 154.2(17) . . ?  
W10 O34 Tb1 164.9(13) . . ?  
W10 O35 Tb2 177.7(16) . . ?  
Tb1 O37 Cs2 128.5(12) . . ?  
Tb1 O38 Cs4 130.7(11) . . ?  
W11 O39 W10 150.3(15) . . ?  
W12 O40 W10 149.4(14) . . ?  
W12 O41 W11 142.7(15) . . ?  
W16 O42 W11 122.2(15) . . ?  
W15 O43 W16 144.6(16) . . ?  
W14 O44 W15 121.9(14) . . ?  
W14 O44 K4 98.9(11) . . ?  
W15 O44 K4 100.9(10) . . ?  
W14 O45 W13 146.1(13) . . ?  
W14 O45 Cs1 100.2(9) . . ?  
W13 O45 Cs1 97.8(9) . . ?  
W12 O46 W13 119.8(13) . . ?  
As2 O47 W18 136.3(13) . . ?  
As2 O47 W12 115.7(11) . . ?  
W18 O47 W12 96.0(9) . . ?  
As2 O47 W13 112.0(11) . . ?  
W18 O47 W13 94.0(9) . . ?  
W12 O47 W13 93.6(9) . . ?  
As2 O48 W16 115.5(11) . . ?  
As2 O48 W17 132.4(12) . . ?  
W16 O48 W17 94.5(9) . . ?  
As2 O48 W11 120.6(12) . . ?  
W16 O48 W11 93.5(9) . . ?  
W17 O48 W11 91.4(8) . . ?  
As2 O49 W15 115.5(12) . . ?  
As2 O49 W19 133.9(12) . . ?  
W15 O49 W19 94.9(9) . . ?  
As2 O49 W14 118.9(12) . . ?  
W15 O49 W14 92.1(8) . . ?  
W19 O49 W14 92.0(8) . . ?  
W11 O50 Na15 144.3(19) . 1\_565 ?  
W16 O52 Tb2 158.2(16) . . ?  
W15 O53 Tb2 156.4(16) . . ?  
W15 O53 K4 107.4(12) . . ?  
Tb2 O53 K4 96.0(10) . . ?  
W15 O54 Na5 121.0(15) . . ?  
W14 O55 W20 151.7(13) . . ?  
W14 O55 K4 109.3(10) . . ?  
W20 O55 K4 98.9(9) . . ?  
W14 O56 Cs1 107.4(13) . . ?  
W20 O57 W13 152.4(14) . . ?  
W13 O58 Cs1 111.0(11) . . ?  
W12 O60 W18 120.4(14) . . ?  
W17 O61 W11 124.4(14) . . ?  
W17 O61 K2 119.1(13) . . ?  
W11 O61 K2 115.2(11) . . ?  
W17 O62 W16 119.0(15) . . ?  
W17 O62 K8 106.8(12) . . ?  
W16 O62 K8 133.4(12) . . ?  
W19 O63 W15 120.0(15) . . ?  
W19 O64 W14 118.1(14) . . ?  
W13 O65 W18 120.4(13) . . ?  
W18 O66 W19 148.1(17) . . ?  
W18 O66 Cs1 104.0(11) . 2 ?  
W19 O66 Cs1 101.6(10) . 2 ?  
W19 O67 W17 160.2(17) . . ?  
W18 O68 W17 146.9(14) . . ?

W19 O69 Cs1 105.4(13) . 2 ?  
W18 O70 Cs1 103.4(11) . 2 ?  
W17 O71 K8 102.0(13) . . ?  
W20 O72 Tb1 159.3(14) . . ?  
W20 O72 Cs2 91.6(9) . . ?  
Tb1 O72 Cs2 105.2(8) . . ?  
W20 O73 Tb2 171.8(14) . . ?  
Tb2 O76 Cs2 117.5(12) . . ?  
W23 O77 Tb1 164.1(16) . . ?  
W22 O78 W23 151.8(15) . . ?  
W22 O78 Cs4 106.8(10) . . ?  
W23 O78 Cs4 100.9(9) . . ?  
W22 O79 Cs1 128.6(14) . . ?  
W21 O80 W22 150.2(15) . . ?  
W22 O81 W27 118.4(13) . . ?  
W31 O82 W27 153.7(16) . . ?  
W27 O84 W26 144.8(17) . . ?  
W26 O85 W31 152.6(13) . . ?  
W26 O86 K2 129.2(15) . 1\_545 ?  
W25 O87 W26 120.6(14) . . ?  
W25 O88 Tb3 159.9(14) . . ?  
W25 O89 Na7 151.5(16) . . ?  
W25 O90 W24 144.2(14) . . ?  
W24 O91 Tb3 155.9(15) . . ?  
W24 O91 Cs2 105.9(10) . . ?  
Tb3 O91 Cs2 98.1(9) . . ?  
W23 O93 W24 120.0(13) . . ?  
W23 O93 Cs2 94.8(9) . . ?  
W24 O93 Cs2 105.1(9) . . ?  
W29 O94 W23 119.9(12) . . ?  
W29 O94 Cs4 111.4(10) . . ?  
W23 O94 Cs4 104.1(9) . . ?  
W22 O95 W28 120.6(14) . . ?  
W22 O95 Cs4 102.5(11) . . ?  
W28 O95 Cs4 101.6(10) . . ?  
W27 O96 W28 120.2(13) . . ?  
W30 O97 W26 122.4(13) . . ?  
W30 O98 W25 119.0(13) . . ?  
W29 O99 W24 122.0(14) . . ?  
As3 O101 W28 136.0(13) . . ?  
As3 O101 W22 113.4(12) . . ?  
W28 O101 W22 95.3(8) . . ?  
As3 O101 W27 115.2(11) . . ?  
W28 O101 W27 94.8(9) . . ?  
W22 O101 W27 92.8(9) . . ?  
As3 O102 W24 114.1(12) . . ?  
As3 O102 W23 120.3(13) . . ?  
W24 O102 W23 93.3(9) . . ?  
As3 O102 W29 132.6(13) . . ?  
W24 O102 W29 94.7(9) . . ?  
W23 O102 W29 93.0(9) . . ?  
W28 O103 W30 149.6(15) . . ?  
W28 O103 K7 100.7(10) . . ?  
W30 O103 K7 101.4(10) . . ?  
W28 O104 W29 146.9(15) . . ?  
W28 O104 Cs4 109.1(11) . . ?  
W29 O104 Cs4 102.4(10) . . ?  
W30 O105 W29 156.2(15) . . ?  
W30 O106 K7 106.0(11) . 2\_645 ?  
W30 O106 K7 108.7(11) . . ?  
K7 O106 K7 46.9(6) 2\_645 . ?  
W28 O107 K7 108.0(11) . . ?  
W21 O109 W20 116.2(12) . . ?  
W21 O109 K4 112.1(10) . . ?

W20 O109 K4 106.5(10) . . ?  
W21 O109 Cs2 107.9(10) . . ?  
W20 O109 Cs2 105.7(9) . . ?  
K4 O109 Cs2 108.0(7) . . ?  
W20 O110 W21 100.0(9) . . ?  
W20 O110 Cs1 128.8(9) . . ?  
W21 O110 Cs1 111.4(7) . . ?  
W21 O111 Tb3 171.7(15) . . ?  
W21 O111 Cs2 90.2(9) . . ?  
Tb3 O111 Cs2 93.5(8) . . ?  
Tb3 O112 Cs3 91.0(8) . . ?  
W43 O113 Tb3 147.8(13) . . ?  
W43 O113 Cs2 103.3(10) . . ?  
Tb3 O113 Cs2 108.9(8) . . ?  
W31 O114 Tb3 171.1(14) . . ?  
W41 O115 Tb3 152.8(14) . . ?  
W41 O115 Cs3 99.6(10) . . ?  
Tb3 O115 Cs3 99.3(9) . . ?  
Tb4 O116 K4 121.4(10) . . ?  
W31 O117 Tb4 173.4(13) . . ?  
W41 O118 Tb4 171.5(14) . . ?  
W33 O119 W32 145.5(17) . . ?  
W33 O119 K8 109.1(12) . 1\_545 ?  
W32 O119 K8 104.8(11) . 1\_545 ?  
W21 O120 Tb4 157.4(15) . . ?  
Tb4 O121 Na11 119.2(12) . . ?  
Tb4 O121 Cs1 118.4(10) . . ?  
Na11 O121 Cs1 94.5(10) . . ?  
Tb4 O122 K5 132.8(10) . . ?  
W36 O123 Tb4 159.9(15) . . ?  
W37 O124 Tb4 161.0(16) . . ?  
W32 O125 W31 152.0(13) . . ?  
W31 O126 W33 150.9(16) . . ?  
W41 O127 W34 153.8(15) . . ?  
W41 O127 Cs3 86.3(9) . . ?  
W34 O127 Cs3 88.7(9) . . ?  
W35 O128 W41 150.6(14) . . ?  
W35 O129 Cs5 108.9(12) . . ?  
W35 O129 K1 132.3(13) . . ?  
Cs5 O129 K1 102.0(8) . . ?  
W34 O130 W35 147.7(15) . . ?  
W34 O131 Na1 106.7(15) . . ?  
W34 O131 Cs3 120.3(13) . . ?  
Na1 O131 Cs3 85.7(10) . . ?  
W34 O132 W33 121.3(14) . . ?  
W53 O134 W52 148(2) . . ?  
W53 O134 K12 132.0(18) . . ?  
W52 O134 K12 28.9(6) . . ?  
W53 O134 Cs6 101.6(12) . 1\_565 ?  
W52 O134 Cs6 99.2(12) . 1\_565 ?  
K12 O134 Cs6 125.2(14) . 1\_565 ?  
W32 O135 K2 137.4(16) . 1\_545 ?  
W32 O136 W37 120.3(13) . . ?  
W37 O138 W36 141.2(14) . . ?  
W36 O139 Na4 112.6(14) . 1\_455 ?  
W36 O139 K5 127.0(14) . . ?  
Na4 O139 K5 113.7(11) 1\_455 . ?  
W36 O139 K3 106.6(13) . . ?  
Na4 O139 K3 96.6(10) 1\_455 . ?  
K5 O139 K3 92.1(9) . . ?  
W35 O140 W36 120.8(14) . . ?  
W35 O140 K3 137.6(12) . . ?  
W36 O140 K3 98.7(10) . . ?  
W35 O140 Cs5 96.1(9) . . ?

W36 O140 Cs5 139.7(12) . . ?  
K3 O140 Cs5 53.9(6) . . ?  
As4 O141 W36 114.9(12) . . ?  
As4 O141 W39 133.4(14) . . ?  
W36 O141 W39 95.0(10) . . ?  
As4 O141 W35 119.2(12) . . ?  
W36 O141 W35 92.9(10) . . ?  
W39 O141 W35 92.2(9) . . ?  
As4 O142 W40 138.5(15) . . ?  
As4 O142 W33 116.1(13) . . ?  
W40 O142 W33 93.5(10) . . ?  
As4 O142 W34 113.7(13) . . ?  
W40 O142 W34 92.8(10) . . ?  
W33 O142 W34 91.0(10) . . ?  
As4 O143 W37 114.7(13) . . ?  
As4 O143 W38 133.2(13) . . ?  
W37 O143 W38 93.8(10) . . ?  
As4 O143 W32 122.5(13) . . ?  
W37 O143 W32 92.2(9) . . ?  
W38 O143 W32 90.5(9) . . ?  
W38 O144 W32 124.0(19) . . ?  
W38 O144 K8 106.2(14) . 1\_545 ?  
W32 O144 K8 106.5(14) . 1\_545 ?  
W38 O145 W37 118.4(15) . . ?  
W39 O146 W36 118.4(16) . . ?  
W39 O146 Na4 145.1(15) . 1\_455 ?  
W36 O146 Na4 95.0(12) . 1\_455 ?  
W39 O147 W35 120.8(13) . . ?  
W34 O148 W40 120.3(13) . . ?  
W33 O149 W40 118.4(15) . . ?  
W33 O149 K8 102.9(10) . 1\_545 ?  
W40 O149 K8 101.0(10) . 1\_545 ?  
W40 O150 W38 147.6(17) . . ?  
W40 O150 K8 109.0(12) . 1\_545 ?  
W38 O150 K8 101.8(11) . 1\_545 ?  
W39 O151 W38 154.9(17) . . ?  
W40 O152 W39 146.9(17) . . ?  
Tb3 O156 Cs3 102.4(9) . . ?  
W23 O157 W21 154.0(14) . . ?  
W23 O157 Cs2 107.7(10) . . ?  
W21 O157 Cs2 98.3(8) . . ?  
W42 O158 Tb2 145.0(15) . . ?  
W42 O158 K4 108.4(12) . . ?  
Tb2 O158 K4 105.3(9) . . ?  
W42 O159 Tb5 157.8(17) . . ?  
W42 O159 K4 93.6(11) . . ?  
Tb5 O159 K4 98.8(9) . . ?  
W42 O160 W43 141.4(13) . . ?  
W42 O160 Cs2 122.7(10) . . ?  
W43 O160 Cs2 92.9(9) . . ?  
W43 O161 Tb5 161.1(16) . . ?  
W43 O161 Cs3 100.4(11) . . ?  
Tb5 O161 Cs3 98.5(8) . . ?  
W44 O162 W43 119.1(14) . . ?  
W44 O162 Cs3 96.8(9) . . ?  
W43 O162 Cs3 107.8(10) . . ?  
W44 O163 W61 151.1(15) . . ?  
W44 O163 Cs3 106.0(11) . . ?  
W61 O163 Cs3 101.9(9) . . ?  
W44 O165 W45 147.0(17) . . ?  
W45 O166 W61 157.8(18) . . ?  
W45 O167 Na14 156.3(18) . . ?  
W45 O168 W46 121.9(17) . . ?  
W61 O169 Tb6 158.0(17) . . ?

W61 O169 Na16 103.3(14) . 2\_546 ?  
Tb6 O169 Na16 95.8(11) . 2\_546 ?  
W46 O170 W47 146(2) . . ?  
W47 O171 W51 152.6(19) . . ?  
W47 O172 Cs6 142.2(17) . 1\_565 ?  
W47 O173 W42 123.7(16) . . ?  
As5 O174 W50 136.2(14) . . ?  
As5 O174 W46 115.3(13) . . ?  
W50 O174 W46 93.7(10) . . ?  
As5 O174 W45 115.2(13) . . ?  
W50 O174 W45 94.0(10) . . ?  
W46 O174 W45 92.9(9) . . ?  
As5 O175 W43 116.8(14) . . ?  
As5 O175 W44 118.2(13) . . ?  
W43 O175 W44 93.7(11) . . ?  
As5 O175 W49 133.7(15) . . ?  
W43 O175 W49 93.9(10) . . ?  
W44 O175 W49 91.4(10) . . ?  
As5 O176 W42 115.7(14) . . ?  
As5 O176 W48 133.1(15) . . ?  
W42 O176 W48 95.7(10) . . ?  
As5 O176 W47 120.0(13) . . ?  
W42 O176 W47 93.5(11) . . ?  
W48 O176 W47 89.7(10) . . ?  
W48 O177 W47 124.8(18) . . ?  
W48 O178 W42 118.5(14) . . ?  
W49 O179 W43 119.7(14) . . ?  
W49 O179 Cs2 141.6(12) . . ?  
W43 O179 Cs2 81.9(8) . . ?  
W49 O180 W44 121.6(15) . . ?  
W45 O181 W50 121(2) . . ?  
W46 O182 W50 121.8(19) . . ?  
W50 O183 W49 146.4(17) . . ?  
W49 O184 W48 159.0(16) . . ?  
W50 O185 W48 151.1(18) . . ?  
W50 O186 Na6 105.5(18) . 1\_565 ?  
Tb5 O189 Na5 125.9(13) . . ?  
W61 O190 Tb5 170.7(14) . . ?  
W41 O192 Tb5 106.4(10) . . ?  
W41 O192 Na1 132.4(12) . . ?  
Tb5 O192 Na1 108.1(11) . . ?  
W41 O192 Cs3 103.3(9) . . ?  
Tb5 O192 Cs3 118.2(9) . . ?  
Na1 O192 Cs3 88.1(9) . . ?  
W51 O193 Tb5 169.3(17) . . ?  
W41 O194 Tb5 113.7(11) . . ?  
W41 O194 K4 127.8(11) . . ?  
Tb5 O194 K4 115.4(10) . . ?  
W51 O195 Tb6 173.7(19) . . ?  
W46 O196 W51 149.1(18) . . ?  
W51 O197 W53 151.1(19) . . ?  
W52 O198 W51 153(2) . . ?  
W52 O198 K12 27.1(7) . . ?  
W51 O198 K12 137.2(19) . . ?  
W52 O199 K12 9.2(6) . . ?  
W52 O199 K6 155(2) . 1\_565 ?  
K12 O199 K6 159.7(16) . 1\_565 ?  
W52 O199 Cs6 104.7(16) . 1\_565 ?  
K12 O199 Cs6 106.9(13) . 1\_565 ?  
K6 O199 Cs6 90.1(10) 1\_565 1\_565 ?  
K12 O200 W52 31.3(7) . . ?  
K12 O200 W57 93.0(15) . . ?  
W52 O200 W57 123.4(17) . . ?  
K12 O200 Cs8 85.3(13) . . ?

W52 O200 Cs8 115.8(14) . . ?  
W57 O200 Cs8 7.7(5) . . ?  
W57 O201 Cs8 32.4(8) . . ?  
W57 O201 Tb6 159(2) . . ?  
Cs8 O201 Tb6 127.1(18) . . ?  
W57 O201 K12 53.6(10) . . ?  
Cs8 O201 K12 72.2(12) . . ?  
Tb6 O201 K12 130.1(14) . . ?  
W57 O202 Cs8 29.4(7) . . ?  
Cs8 O203 W56 128(3) . . ?  
Cs8 O203 W57 5.6(13) . . ?  
W56 O203 W57 134(2) . . ?  
Cs8 O203 Cs7 80(2) . . ?  
W56 O203 Cs7 107.8(17) . . ?  
W57 O203 Cs7 78.7(13) . . ?  
W56 O204 Tb6 159(2) . . ?  
W56 O204 Cs8 63.4(12) . . ?  
Tb6 O204 Cs8 95.6(12) . . ?  
W56 O205 Na9 152(3) . 2\_546 ?  
W56 O205 Cs8 45.0(11) . . ?  
Na9 O205 Cs8 110.6(16) 2\_546 . ?  
K11 O206 W55 134(3) . . ?  
K11 O206 W60 23.0(11) . . ?  
W55 O206 W60 116(2) . . ?  
K11 O206 Na10 157(3) . . ?  
W55 O206 Na10 29.9(11) . . ?  
W60 O206 Na10 145(3) . . ?  
Na4 O207 Cs5 126(4) 1\_455 . ?  
W55 O208 Na10 30.3(10) . . ?  
W55 O208 K1 135.5(17) . . ?  
Na10 O208 K1 109.1(16) . . ?  
W55 O208 Cs5 85.3(13) . . ?  
Na10 O208 Cs5 65.8(11) . . ?  
K1 O208 Cs5 88.7(9) . . ?  
W54 O209 W55 144(2) . . ?  
W54 O209 Na10 151(2) . . ?  
W55 O209 Na10 27.1(8) . . ?  
W54 O209 Cs5 88.0(14) . . ?  
W55 O209 Cs5 92.3(14) . . ?  
Na10 O209 Cs5 70.6(12) . . ?  
W54 O210 K3 148(2) . . ?  
W54 O210 K9 104.8(17) . . ?  
K3 O210 K9 105.7(13) . . ?  
W54 O210 Cs5 99.7(16) . . ?  
K3 O210 Cs5 56.2(8) . . ?  
K9 O210 Cs5 116.9(13) . . ?  
W54 O211 Cs5 82.8(11) . . ?  
W54 O212 W53 120.9(15) . . ?  
W53 O213 Na5 110.2(16) . . ?  
W53 O213 Cs6 108.8(15) . 1\_565 ?  
Na5 O213 Cs6 136.7(12) . 1\_565 ?  
As6 O214 W53 119.3(16) . . ?  
As6 O214 W59 135.7(16) . . ?  
W53 O214 W59 92.5(11) . . ?  
As6 O214 W54 114.2(15) . . ?  
W53 O214 W54 91.9(10) . . ?  
W59 O214 W54 92.9(11) . . ?  
As6 O214 K12 61.5(10) . . ?  
W53 O214 K12 76.3(9) . . ?  
W59 O214 K12 102.5(11) . . ?  
W54 O214 K12 160.9(13) . . ?  
As6 O214 Cs7 72.8(10) . . ?  
W53 O214 Cs7 118.5(11) . . ?  
W59 O214 Cs7 64.7(7) . . ?



W54 O214 Cs7 141.5 (12) . . ?  
K12 O214 Cs7 57.1 (6) . . ?  
K12 O215 As6 126 (2) . . ?  
K12 O215 W57 89.1 (18) . . ?  
As6 O215 W57 119.2 (19) . . ?  
K12 O215 W58 80.2 (17) . . ?  
As6 O215 W58 134.4 (19) . . ?  
W57 O215 W58 94.4 (13) . . ?  
K12 O215 Cs8 117 (2) . . ?  
As6 O215 Cs8 101.6 (17) . . ?  
W57 O215 Cs8 27.7 (5) . . ?  
W58 O215 Cs8 95.0 (13) . . ?  
K12 O215 W52 7.3 (9) . . ?  
As6 O215 W52 120.1 (17) . . ?  
W57 O215 W52 89.6 (12) . . ?  
W58 O215 W52 87.4 (12) . . ?  
Cs8 O215 W52 117.3 (15) . . ?  
K12 O215 Cs7 109 (2) . . ?  
As6 O215 Cs7 110.8 (17) . . ?  
W57 O215 Cs7 97.2 (13) . . ?  
W58 O215 Cs7 29.1 (6) . . ?  
Cs8 O215 Cs7 84.4 (12) . . ?  
W52 O215 Cs7 116.3 (15) . . ?  
As6 O216 W56 118 (2) . . ?  
As6 O216 W55 118.3 (19) . . ?  
W56 O216 W55 92.7 (14) . . ?  
As6 O216 W60 132 (2) . . ?  
W56 O216 W60 92.8 (13) . . ?  
W55 O216 W60 94.1 (14) . . ?  
As6 O216 K11 149 (2) . . ?  
W56 O216 K11 88.7 (12) . . ?  
W55 O216 K11 72.3 (11) . . ?  
W60 O216 K11 22.4 (5) . . ?  
As6 O216 Cs8 75.9 (13) . . ?  
W56 O216 Cs8 55.6 (9) . . ?  
W55 O216 Cs8 147.0 (16) . . ?  
W60 O216 Cs8 96.4 (12) . . ?  
K11 O216 Cs8 111.9 (13) . . ?  
As6 O216 Cs7 87.0 (15) . . ?  
W56 O216 Cs7 99.8 (13) . . ?  
W55 O216 Cs7 142.1 (16) . . ?  
W60 O216 Cs7 50.0 (8) . . ?  
K11 O216 Cs7 72.4 (10) . . ?  
Cs8 O216 Cs7 62.0 (8) . . ?  
K12 O217 W58 88.5 (17) . . ?  
K12 O217 W52 30.3 (8) . . ?  
W58 O217 W52 119 (2) . . ?  
K12 O217 Cs7 83.0 (14) . . ?  
W58 O217 Cs7 6.6 (5) . . ?  
W52 O217 Cs7 113.2 (15) . . ?  
W59 O218 W54 120.4 (18) . . ?  
W59 O218 K9 136.2 (18) . . ?  
W54 O218 K9 103.4 (14) . . ?  
W53 O219 W59 117.7 (17) . . ?  
W56 O220 W55 115.84 (13) . . ?  
W56 O220 Na10 142.5 (7) . . ?  
W55 O220 Na10 26.7 (6) . . ?  
W56 O220 K11 86.5 (3) . . ?  
W55 O220 K11 68.6 (3) . . ?  
Na10 O220 K11 78.6 (7) . . ?  
W58 O221 W57 120 (2) . . ?  
W58 O221 Cs7 34.4 (8) . . ?  
W57 O221 Cs7 115.7 (18) . . ?  
W58 O221 Cs8 116.1 (19) . . ?

W57 O221 Cs8 29.5 (7) . . ?  
Cs7 O221 Cs8 96.0 (16) . . ?  
W58 O221 K12 62.2 (12) . . ?  
W57 O221 K12 64.2 (11) . . ?  
Cs7 O221 K12 83.4 (13) . . ?  
Cs8 O221 K12 81.0 (13) . . ?  
W60 O222 W56 123 (2) . . ?  
W60 O222 K11 31.5 (7) . . ?  
W56 O222 K11 122 (2) . . ?  
W60 O222 Cs7 49.9 (10) . . ?  
W56 O222 Cs7 106.0 (15) . . ?  
K11 O222 Cs7 81.3 (13) . . ?  
W60 O222 Cs8 103.3 (15) . . ?  
W56 O222 Cs8 52.4 (9) . . ?  
K11 O222 Cs8 130.2 (17) . . ?  
Cs7 O222 Cs8 60.1 (8) . . ?  
W58 O224 W59 147 (2) . . ?  
W58 O224 Cs7 35.5 (7) . . ?  
W59 O224 Cs7 113.9 (17) . . ?  
W58 O224 K12 54.5 (9) . . ?  
W59 O224 K12 120.5 (15) . . ?  
Cs7 O224 K12 77.4 (11) . . ?  
W59 O225 W60 151 (2) . . ?  
W59 O225 K11 167 (2) . . ?  
W60 O225 K11 25.3 (6) . . ?  
W59 O225 Cs7 93.8 (15) . . ?  
W60 O225 Cs7 60.7 (10) . . ?  
K11 O225 Cs7 86.0 (12) . . ?  
W59 O226 Na2 156 (2) . 1\_465 ?  
W58 O227 Cs7 35.0 (11) . . ?  
K11 O228 W60 34.2 (10) . . ?  
K11 O228 Na8 129 (2) . 1\_465 ?  
W60 O228 Na8 163 (3) . 1\_465 ?  
K11 O228 Cs7 78.6 (17) . . ?  
W60 O228 Cs7 44.4 (12) . . ?  
Na8 O228 Cs7 151.6 (19) 1\_465 . ?  
Tb6 O229 K1 126.6 (11) . . ?  
W64 O231 Tb6 145.3 (19) . . ?  
Tb6 O232 Na16 95.9 (13) . 2\_546 ?  
W63 O233 W62 161 (2) . . ?  
W64 O234 W62 153.5 (18) . . ?  
W65 O235 W64 119 (2) . . ?  
W65 O236 Tb7 158 (2) . . ?  
W65 O237 Tb7 161 (2) . 2\_546 ?  
W65 O238 W66 145 (2) . . ?  
W66 O239 Tb7 159 (3) . . ?  
W66 O240 Na16 139 (3) . . ?  
W67 O241 W66 118 (2) . . ?  
W67 O242 W72 155 (2) . . ?  
W67 O244 W68 150 (3) . . ?  
W68 O245 W72 152 (2) . . ?  
W68 O246 Cs6 137 (2) . . ?  
W68 O247 W63 120.3 (19) . . ?  
W63 O248 Na1 122 (2) . . ?  
W71 O249 W64 122 (2) . . ?  
W71 O250 W65 115.4 (19) . . ?  
W70 O251 W66 120 (3) . . ?  
W70 O252 W67 128 (4) . . ?  
W68 O253 W69 121 (2) . . ?  
W63 O254 W69 128 (2) . . ?  
W69 O255 W71 147 (3) . . ?  
W71 O256 W70 158 (3) . . ?  
W69 O257 W70 153 (3) . . ?  
W72 O261 Tb7 167.7 (19) . . ?

W62 O262 Tb7 164(2) . . ?  
Tb7 O263 Na16 123.4(17) . 2\_546 ?  
Tb7 O263 Na14 117.7(18) . . ?  
Na16 O263 Na14 113.4(18) 2\_546 . ?  
W82 O265 Tb7 150.3(17) . . ?  
W77 O268 W82 151(2) . . ?  
W77 O269 Na9 146.3(19) . . ?  
W77 O270 W76 149(2) . . ?  
W76 O271 W82 149(2) . . ?  
W82 O272 Tb8 155(2) . . ?  
W76 O274 W75 121.6(14) . . ?  
W75 O275 Tb8 158.3(15) . . ?  
W75 O276 Na7 145.5(16) . . ?  
W74 O277 W75 142.6(15) . . ?  
W74 O278 Tb8 157.8(18) . . ?  
W74 O280 W73 119.0(16) . . ?  
W73 O281 W72 150.9(19) . . ?  
W73 O282 K6 123(2) . . ?  
W73 O282 Cs6 138(2) . . ?  
K6 O282 Cs6 95.9(12) . . ?  
W73 O283 W78 145(2) . . ?  
W72 O284 W78 151(2) . . ?  
W77 O286 W78 120.3(17) . . ?  
As8 O287 W77 114.6(17) . . ?  
As8 O287 W78 117.2(17) . . ?  
W77 O287 W78 93.8(12) . . ?  
As8 O287 W79 134.5(18) . . ?  
W77 O287 W79 94.7(13) . . ?  
W78 O287 W79 93.1(12) . . ?  
As8 O288 W75 116.6(14) . . ?  
As8 O288 W81 133.4(15) . . ?  
W75 O288 W81 94.5(10) . . ?  
As8 O288 W76 118.2(14) . . ?  
W75 O288 W76 93.2(10) . . ?  
W81 O288 W76 91.7(10) . . ?  
As8 O289 W74 116.2(15) . . ?  
As8 O289 W80 134.1(16) . . ?  
W74 O289 W80 93.6(11) . . ?  
As8 O289 W73 121.3(15) . . ?  
W74 O289 W73 91.3(10) . . ?  
W80 O289 W73 89.9(10) . . ?  
W80 O290 W74 119.2(16) . . ?  
W80 O291 W73 124(2) . . ?  
W78 O292 W79 118.0(18) . . ?  
W79 O293 W77 119.3(19) . . ?  
W81 O294 W75 120.9(15) . . ?  
W81 O295 W76 121.1(17) . . ?  
W81 O296 W80 155.6(16) . . ?  
W79 O297 W81 151(2) . . ?  
W80 O298 W79 148.5(19) . . ?  
W81 O300 Na2 141.1(18) . . ?  
W80 O301 Na6 137.4(18) . . ?  
W72 O302 Tb8 170(2) . . ?  
Tb8 O304 Cs3 100.5(12) . . ?  
Tb8 O305 Cs3 90.1(11) . . ?  
W62 O306 Tb8 151(2) . . ?  
W62 O306 Cs3 111.3(16) . . ?  
Tb8 O306 Cs3 96.9(11) . . ?  
W61 O307 W62 108.2(12) . . ?  
W61 O307 Na1 112.9(14) . . ?  
W62 O307 Na1 134.7(13) . . ?  
W61 O307 Cs3 102.4(10) . . ?  
W62 O307 Cs3 103.4(10) . . ?  
Na1 O307 Cs3 85.7(9) . . ?

W62 O308 W61 102.5(12) . . ?  
W62 O308 Na16 113.8(12) . 2\_546 ?  
W61 O308 Na16 93.7(11) . 2\_546 ?  
W63 O309 W64 144(2) . . ?  
W63 O309 K1 106.2(14) . . ?  
W64 O309 K1 102.4(14) . . ?  
Cs8 O314 Cs7 61.4(7) . . ?  
Cs1 O324 Cs1 180.00(15) 2 . ?  
Na11 O326 Cs1 86.5(15) . . ?  
K2 O337 K8 118.3(17) 1\_545 1\_545 ?  
K5 O346 K3 83.7(11) . . ?  
Na2 O348 K9 116(2) . 1\_645 ?  
Na7 O351 Na15 136(3) . . ?  
As7 O361 W65 113.5(18) . . ?  
As7 O361 W64 118.0(17) . . ?  
W65 O361 W64 93.8(14) . . ?  
As7 O361 W71 134.1(19) . . ?  
W65 O361 W71 94.7(14) . . ?  
W64 O361 W71 94.0(14) . . ?  
As7 O362 W66 111.6(19) . . ?  
As7 O362 W70 132(2) . . ?  
W66 O362 W70 91.4(14) . . ?  
As7 O362 W67 127(2) . . ?  
W66 O362 W67 91.4(15) . . ?  
W70 O362 W67 91.8(14) . . ?  
As7 O363 W69 133.0(18) . . ?  
As7 O363 W68 114.0(17) . . ?  
W69 O363 W68 95.5(13) . . ?  
As7 O363 W63 115.1(16) . . ?  
W69 O363 W63 95.9(13) . . ?  
W68 O363 W63 95.9(13) . . ?  
As3 O389 W25 117.4(12) . . ?  
As3 O389 W30 132.6(12) . . ?  
W25 O389 W30 94.9(9) . . ?  
As3 O389 W26 119.4(12) . . ?  
W25 O389 W26 93.4(9) . . ?  
W30 O389 W26 89.9(9) . . ?  
Na9 O393 Cs8 123(3) 2\_546 . ?  
O379 Na15 O387 126(2) . 2\_545 ?  
O379 Na15 O351 73.2(19) . . ?  
O387 Na15 O351 145(2) 2\_545 . ?  
O379 Na15 O50 78.4(16) . 1\_545 ?  
O387 Na15 O50 60.0(15) 2\_545 1\_545 ?  
O351 Na15 O50 150.9(17) . 1\_545 ?  
O240 Na16 O263 96(2) . 2\_546 ?  
O240 Na16 O232 75.2(19) . 2\_546 ?  
O263 Na16 O232 150.1(16) 2\_546 2\_546 ?  
O240 Na16 O169 131(2) . 2\_546 ?  
O263 Na16 O169 122.9(15) 2\_546 2\_546 ?  
O232 Na16 O169 56.1(11) 2\_546 2\_546 ?  
O240 Na16 O308 139.9(19) . 2\_546 ?  
O263 Na16 O308 63.3(12) 2\_546 2\_546 ?  
O232 Na16 O308 105.3(12) 2\_546 2\_546 ?  
O169 Na16 O308 59.7(10) 2\_546 2\_546 ?  
O240 Na16 W66 18.1(15) . . ?  
O263 Na16 W66 83.9(12) 2\_546 . ?  
O232 Na16 W66 92.3(10) 2\_546 . ?  
O169 Na16 W66 148.4(11) 2\_546 . ?  
O308 Na16 W66 140.7(10) 2\_546 . ?  
O240 Na16 Tb6 106.3(18) . 2\_546 ?  
O263 Na16 Tb6 157.3(13) 2\_546 2\_546 ?  
O232 Na16 Tb6 39.2(8) 2\_546 2\_546 ?  
O169 Na16 Tb6 36.2(7) 2\_546 2\_546 ?  
O308 Na16 Tb6 95.7(9) 2\_546 2\_546 ?

W66 Na16 Tb6 118.8(7) . 2\_546 ?  
O263 Na14 O167 68.1(13) . . ?  
O343 Na13 Cs7 94(2) . 1\_645 ?  
O386 Na12 Cs8 156.2(14) . . ?  
O319 Na11 O121 120.4(17) . . ?  
O319 Na11 O326 53.8(16) . . ?  
O121 Na11 O326 80.3(15) . . ?  
O319 Na11 O327 46.2(17) . . ?  
O121 Na11 O327 138.2(19) . . ?  
O326 Na11 O327 100(2) . . ?  
O319 Na11 Cs1 106.4(14) . . ?  
O121 Na11 Cs1 46.7(8) . . ?  
O326 Na11 Cs1 52.6(12) . . ?  
O327 Na11 Cs1 152.5(16) . . ?  
W55 Na10 O208 52.4(16) . . ?  
W55 Na10 O206 57.1(17) . . ?  
O208 Na10 O206 109(2) . . ?  
W55 Na10 O209 51.4(14) . . ?  
O208 Na10 O209 71.7(16) . . ?  
O206 Na10 O209 67.3(17) . . ?  
W55 Na10 O220 54.5(11) . . ?  
O208 Na10 O220 71.9(13) . . ?  
O206 Na10 O220 67.2(15) . . ?  
O209 Na10 O220 105.3(14) . . ?  
W55 Na10 O340 150(3) . 1\_455 ?  
O208 Na10 O340 157(2) . 1\_455 ?  
O206 Na10 O340 93(2) . 1\_455 ?  
O209 Na10 O340 125(2) . 1\_455 ?  
O220 Na10 O340 112.9(18) . 1\_455 ?  
W55 Na10 Cs5 110.2(15) . . ?  
O208 Na10 Cs5 79.3(12) . . ?  
O206 Na10 Cs5 129.3(16) . . ?  
O209 Na10 Cs5 69.1(11) . . ?  
O220 Na10 Cs5 150.8(11) . . ?  
O340 Na10 Cs5 91.8(17) 1\_455 . ?  
W55 Na10 K11 53.1(12) . . ?  
O208 Na10 K11 104.7(14) . . ?  
O206 Na10 K11 8.8(13) . . ?  
O209 Na10 K11 71.6(12) . . ?  
O220 Na10 K11 58.4(6) . . ?  
O340 Na10 K11 96.6(18) 1\_455 . ?  
Cs5 Na10 K11 136.8(8) . . ?  
W55 Na10 K1 92.4(15) . . ?  
O208 Na10 K1 43.1(12) . . ?  
O206 Na10 K1 144.5(17) . . ?  
O209 Na10 K1 109.7(13) . . ?  
O220 Na10 K1 80.6(7) . . ?  
O340 Na10 K1 113.8(18) 1\_455 . ?  
Cs5 Na10 K1 75.0(5) . . ?  
K11 Na10 K1 136.4(8) . . ?  
Na8 Na6 O341 125(3) . . ?  
Na8 Na6 O301 86(2) . . ?  
O341 Na6 O301 52.6(15) . . ?  
Na8 Na6 O186 93(2) . 1\_545 ?  
O341 Na6 O186 142(2) . 1\_545 ?  
O301 Na6 O186 148.3(19) . 1\_545 ?  
Na8 Na6 K11 86.1(17) . 1\_645 ?  
O341 Na6 K11 84.9(16) . 1\_645 ?  
O301 Na6 K11 118.3(14) . 1\_645 ?  
O186 Na6 K11 93.1(13) 1\_545 1\_645 ?  
Na6 Na8 O228 89(2) . 1\_645 ?  
Na6 Na8 K11 71.5(17) . 1\_645 ?  
O228 Na8 K11 19.1(10) 1\_645 1\_645 ?  
O393 Na9 O269 79.7(19) 2\_546 . ?

O393 Na9 O205 75(2) 2\_546 2\_546 ?  
O269 Na9 O205 141.3(18) . 2\_546 ?  
O393 Na9 O331 91(3) 2\_546 . ?  
O269 Na9 O331 78(2) . . ?  
O205 Na9 O331 131(2) 2\_546 . ?  
O189 Na5 O54 117.3(12) . . ?  
O189 Na5 O213 104.6(12) . . ?  
O54 Na5 O213 115.7(13) . . ?  
O189 Na5 O333 76.6(18) . . ?  
O54 Na5 O333 56.1(17) . . ?  
O213 Na5 O333 93.1(18) . . ?  
O189 Na5 K4 66.9(8) . . ?  
O54 Na5 K4 78.8(8) . . ?  
O213 Na5 K4 165.5(11) . . ?  
O333 Na5 K4 96.0(17) . . ?  
O207 Na4 O366 79(2) 1\_655 . ?  
O207 Na4 O139 91(2) 1\_655 1\_655 ?  
O366 Na4 O139 152.9(15) . 1\_655 ?  
O207 Na4 O368 83(3) 1\_655 . ?  
O366 Na4 O368 84.8(19) . . ?  
O139 Na4 O368 119.1(18) 1\_655 . ?  
O207 Na4 O21 91(2) 1\_655 . ?  
O366 Na4 O21 72.2(12) . . ?  
O139 Na4 O21 83.0(10) 1\_655 . ?  
O368 Na4 O21 157.0(18) . . ?  
O207 Na4 O367 148(2) 1\_655 . ?  
O366 Na4 O367 71.9(14) . . ?  
O139 Na4 O367 121.0(13) 1\_655 . ?  
O368 Na4 O367 81.7(19) . . ?  
O21 Na4 O367 92.4(13) . . ?  
O207 Na4 O146 65(2) 1\_655 1\_655 ?  
O366 Na4 O146 133.9(14) . 1\_655 ?  
O139 Na4 O146 58.5(10) 1\_655 1\_655 ?  
O368 Na4 O146 64.7(17) . 1\_655 ?  
O21 Na4 O146 131.8(11) . 1\_655 ?  
O367 Na4 O146 130.8(14) . 1\_655 ?  
O207 Na4 K3 64(2) 1\_655 1\_655 ?  
O366 Na4 K3 109.6(11) . 1\_655 ?  
O139 Na4 K3 44.1(7) 1\_655 1\_655 ?  
O368 Na4 K3 139.7(17) . 1\_655 ?  
O21 Na4 K3 52.2(7) . 1\_655 ?  
O367 Na4 K3 138.2(12) . 1\_655 ?  
O146 Na4 K3 79.6(8) 1\_655 1\_655 ?  
O207 Na4 Cs5 29(2) 1\_655 1\_655 ?  
O366 Na4 Cs5 91.1(11) . 1\_655 ?  
O139 Na4 Cs5 69.6(7) 1\_655 1\_655 ?  
O368 Na4 Cs5 110.2(16) . 1\_655 ?  
O21 Na4 Cs5 69.7(7) . 1\_655 ?  
O367 Na4 Cs5 158.7(12) . 1\_655 ?  
O146 Na4 Cs5 70.3(7) 1\_655 1\_655 ?  
K3 Na4 Cs5 35.6(3) 1\_655 1\_655 ?  
O349 Na7 O89 166.1(17) . . ?  
O349 Na7 O384 89.7(15) . . ?  
O89 Na7 O384 85.4(13) . . ?  
O349 Na7 O276 96.4(15) . . ?  
O89 Na7 O276 96.2(13) . . ?  
O384 Na7 O276 86.1(12) . . ?  
O349 Na7 O351 88(2) . . ?  
O89 Na7 O351 79.1(18) . . ?  
O384 Na7 O351 90.1(17) . . ?  
O276 Na7 O351 174(2) . . ?  
O349 Na7 O350 95.1(17) . . ?  
O89 Na7 O350 92.1(15) . . ?  
O384 Na7 O350 168.6(17) . . ?

O276 Na7 O350 83.1(14) . . ?  
O351 Na7 O350 100.4(19) . . ?  
O300 Na2 O226 87.1(15) . 1\_645 ?  
O300 Na2 O347 93.0(18) . . ?  
O226 Na2 O347 174(2) 1\_645 . ?  
O300 Na2 O348 164(2) . . ?  
O226 Na2 O348 84(2) 1\_645 . ?  
O347 Na2 O348 97(2) . . ?  
O300 Na2 O375 80.6(14) . . ?  
O226 Na2 O375 99.0(17) 1\_645 . ?  
O347 Na2 O375 87.1(18) . . ?  
O348 Na2 O375 88(2) . . ?  
O300 Na2 O345 89.7(17) . . ?  
O226 Na2 O345 84.1(18) 1\_645 . ?  
O347 Na2 O345 90(2) . . ?  
O348 Na2 O345 102(2) . . ?  
O375 Na2 O345 170(2) . . ?  
O300 Na2 K9 129.4(11) . 1\_645 ?  
O226 Na2 K9 69.7(12) 1\_645 1\_645 ?  
O347 Na2 K9 114.6(15) . 1\_645 ?  
O348 Na2 K9 35.1(16) . 1\_645 ?  
O375 Na2 K9 60.8(12) . 1\_645 ?  
O345 Na2 K9 129.3(16) . 1\_645 ?  
O307 Na1 O192 86.4(11) . . ?  
O307 Na1 O248 89.3(13) . . ?  
O192 Na1 O248 135.1(15) . . ?  
O307 Na1 O131 83.7(11) . . ?  
O192 Na1 O131 74.0(10) . . ?  
O248 Na1 O131 61.1(12) . . ?  
O307 Na1 K1 118.3(11) . . ?  
O192 Na1 K1 145.4(13) . . ?  
O248 Na1 K1 73.0(11) . . ?  
O131 Na1 K1 128.9(12) . . ?  
O307 Na1 Cs3 51.6(7) . . ?  
O192 Na1 Cs3 47.5(7) . . ?  
O248 Na1 Cs3 97.2(12) . . ?  
O131 Na1 Cs3 47.5(7) . . ?  
K1 Na1 Cs3 166.9(10) . . ?  
O360 K1 O332 55(3) . . ?  
O360 K1 Na1 138(2) . . ?  
O332 K1 Na1 128.8(17) . . ?  
O360 K1 O229 79(2) . . ?  
O332 K1 O229 126.7(16) . . ?  
Na1 K1 O229 69.2(8) . . ?  
O360 K1 O208 70(2) . . ?  
O332 K1 O208 120.9(17) . . ?  
Na1 K1 O208 104.5(9) . . ?  
O229 K1 O208 47.1(9) . . ?  
O360 K1 O129 144(2) . . ?  
O332 K1 O129 150.8(16) . . ?  
Na1 K1 O129 58.7(8) . . ?  
O229 K1 O129 82.4(7) . . ?  
O208 K1 O129 75.1(8) . . ?  
O360 K1 O309 79(2) . . ?  
O332 K1 O309 57.2(17) . . ?  
Na1 K1 O309 75.4(8) . . ?  
O229 K1 O309 93.2(9) . . ?  
O208 K1 O309 132.6(10) . . ?  
O129 K1 O309 132.4(8) . . ?  
O360 K1 Na10 66(2) . . ?  
O332 K1 Na10 103.7(16) . . ?  
Na1 K1 Na10 127.0(7) . . ?  
O229 K1 Na10 74.5(7) . . ?  
O208 K1 Na10 27.8(8) . . ?

O129 K1 Na10 79.6(6) . . ?  
O309 K1 Na10 144.7(8) . . ?  
O360 K1 Cs5 109(2) . . ?  
O332 K1 Cs5 131.8(16) . . ?  
Na1 K1 Cs5 94.5(6) . . ?  
O229 K1 Cs5 83.9(6) . . ?  
O208 K1 Cs5 50.2(7) . . ?  
O129 K1 Cs5 37.6(5) . . ?  
O309 K1 Cs5 169.8(7) . . ?  
Na10 K1 Cs5 43.6(4) . . ?  
O116 K4 O194 75.3(7) . . ?  
O116 K4 O158 172.1(9) . . ?  
O194 K4 O158 107.6(8) . . ?  
O116 K4 O109 100.9(8) . . ?  
O194 K4 O109 111.0(8) . . ?  
O158 K4 O109 85.0(8) . . ?  
O116 K4 O55 80.3(7) . . ?  
O194 K4 O55 147.2(8) . . ?  
O158 K4 O55 99.5(7) . . ?  
O109 K4 O55 52.7(7) . . ?  
O116 K4 O53 112.4(8) . . ?  
O194 K4 O53 150.2(8) . . ?  
O158 K4 O53 61.4(8) . . ?  
O109 K4 O53 96.1(7) . . ?  
O55 K4 O53 60.7(7) . . ?  
O116 K4 O159 129.6(8) . . ?  
O194 K4 O159 59.4(7) . . ?  
O158 K4 O159 50.4(7) . . ?  
O109 K4 O159 114.3(8) . . ?  
O55 K4 O159 149.9(8) . . ?  
O53 K4 O159 98.9(8) . . ?  
O116 K4 O44 65.1(7) . . ?  
O194 K4 O44 132.8(8) . . ?  
O158 K4 O44 108.8(8) . . ?  
O109 K4 O44 101.0(7) . . ?  
O55 K4 O44 48.3(7) . . ?  
O53 K4 O44 47.5(7) . . ?  
O159 K4 O44 134.4(8) . . ?  
O116 K4 W42 155.8(6) . . ?  
O194 K4 W42 82.5(5) . . ?  
O158 K4 W42 25.2(5) . . ?  
O109 K4 W42 96.0(5) . . ?  
O55 K4 W42 123.9(6) . . ?  
O53 K4 W42 82.6(6) . . ?  
O159 K4 W42 26.2(5) . . ?  
O44 K4 W42 128.3(6) . . ?  
O116 K4 Na5 107.9(7) . . ?  
O194 K4 Na5 90.9(6) . . ?  
O158 K4 Na5 65.1(7) . . ?  
O109 K4 Na5 147.6(7) . . ?  
O55 K4 Na5 117.6(7) . . ?  
O53 K4 Na5 59.4(6) . . ?  
O159 K4 Na5 56.1(6) . . ?  
O44 K4 Na5 78.5(6) . . ?  
W42 K4 Na5 62.3(4) . . ?  
O116 K4 W20 103.8(6) . . ?  
O194 K4 W20 138.9(6) . . ?  
O158 K4 W20 78.9(6) . . ?  
O109 K4 W20 27.9(5) . . ?  
O55 K4 W20 31.0(5) . . ?  
O53 K4 W20 69.2(5) . . ?  
O159 K4 W20 124.3(6) . . ?  
O44 K4 W20 77.4(5) . . ?  
W42 K4 W20 99.2(3) . . ?



Na5 K4 W20 126.6(5) . . ?  
O116 K4 W14 63.3(5) . . ?  
O194 K4 W14 138.5(6) . . ?  
O158 K4 W14 113.8(6) . . ?  
O109 K4 W14 75.4(5) . . ?  
O55 K4 W14 24.4(5) . . ?  
O53 K4 W14 59.0(5) . . ?  
O159 K4 W14 157.5(7) . . ?  
O44 K4 W14 26.8(5) . . ?  
W42 K4 W14 138.8(3) . . ?  
Na5 K4 W14 104.3(4) . . ?  
W20 K4 W14 55.47(14) . . ?  
O391 K5 O321 71.5(9) . . ?  
O391 K5 O320 106.1(9) . . ?  
O321 K5 O320 70.0(9) . . ?  
O391 K5 O139 81.0(9) . . ?  
O321 K5 O139 131.6(9) . . ?  
O320 K5 O139 157.9(10) . . ?  
O391 K5 O14 126.4(9) . 1\_455 ?  
O321 K5 O14 75.3(9) . 1\_455 ?  
O320 K5 O14 100.4(9) . 1\_455 ?  
O139 K5 O14 91.4(9) . 1\_455 ?  
O391 K5 O346 155.4(12) . . ?  
O321 K5 O346 129.1(12) . . ?  
O320 K5 O346 74.6(11) . . ?  
O139 K5 O346 90.3(11) . . ?  
O14 K5 O346 76.5(11) 1\_455 . ?  
O391 K5 O6 70.9(9) . 1\_455 ?  
O321 K5 O6 61.5(8) . 1\_455 ?  
O320 K5 O6 129.7(9) . 1\_455 ?  
O139 K5 O6 72.3(8) . 1\_455 ?  
O14 K5 O6 56.4(8) 1\_455 1\_455 ?  
O346 K5 O6 128.2(11) . 1\_455 ?  
O391 K5 O122 79.0(9) . . ?  
O321 K5 O122 122.6(8) . . ?  
O320 K5 O122 72.8(8) . . ?  
O139 K5 O122 88.6(8) . . ?  
O14 K5 O122 154.3(9) 1\_455 . ?  
O346 K5 O122 77.8(11) . . ?  
O6 K5 O122 146.3(9) 1\_455 . ?  
O391 K5 W6 95.1(7) . 1\_455 ?  
O321 K5 W6 64.4(6) . 1\_455 ?  
O320 K5 W6 119.4(7) . 1\_455 ?  
O139 K5 W6 79.8(6) . 1\_455 ?  
O14 K5 W6 31.7(6) 1\_455 1\_455 ?  
O346 K5 W6 106.0(9) . 1\_455 ?  
O6 K5 W6 24.6(6) 1\_455 1\_455 ?  
O122 K5 W6 167.7(6) . 1\_455 ?  
O391 K5 W36 76.8(7) . . ?  
O321 K5 W36 142.0(7) . . ?  
O320 K5 W36 140.7(7) . . ?  
O139 K5 W36 19.3(6) . . ?  
O14 K5 W36 109.2(6) 1\_455 . ?  
O346 K5 W36 87.4(9) . . ?  
O6 K5 W36 88.9(6) 1\_455 . ?  
O122 K5 W36 69.3(5) . . ?  
W6 K5 W36 98.9(2) 1\_455 . ?  
O391 K5 K3 125.8(7) . . ?  
O321 K5 K3 134.7(7) . . ?  
O320 K5 K3 126.4(7) . . ?  
O139 K5 K3 45.4(7) . . ?  
O14 K5 K3 61.0(6) 1\_455 . ?  
O346 K5 K3 52.8(9) . . ?  
O6 K5 K3 83.8(6) 1\_455 . ?

O122 K5 K3 102.5(6) . . ?  
W6 K5 K3 72.1(3) 1\_455 . ?  
W36 K5 K3 55.1(3) . . ?  
O282 K6 O199 91.9(11) . 1\_545 ?  
O282 K6 W73 19.8(8) . . ?  
O199 K6 W73 111.2(8) 1\_545 . ?  
O282 K6 Cs6 45.6(9) . . ?  
O199 K6 Cs6 46.4(7) 1\_545 . ?  
W73 K6 Cs6 64.9(2) . . ?  
K7 K7 O107 73.9(7) 2\_645 . ?  
K7 K7 O106 67.8(7) 2\_645 2\_645 ?  
O107 K7 O106 70.3(7) . 2\_645 ?  
K7 K7 O106 65.3(7) 2\_645 . ?  
O107 K7 O106 96.5(7) . . ?  
O106 K7 O106 133.1(6) 2\_645 . ?  
K7 K7 O103 74.6(7) 2\_645 . ?  
O107 K7 O103 50.1(6) . . ?  
O106 K7 O103 115.9(8) 2\_645 . ?  
O106 K7 O103 50.4(7) . . ?  
K7 K7 W30 74.1(5) 2\_645 2\_645 ?  
O107 K7 W30 94.4(5) . 2\_645 ?  
O106 K7 W30 24.2(5) 2\_645 2\_645 ?  
O106 K7 W30 132.8(7) . 2\_645 ?  
O103 K7 W30 138.1(6) . 2\_645 ?  
K7 K7 W28 73.9(5) 2\_645 . ?  
O107 K7 W28 23.8(5) . . ?  
O106 K7 W28 92.5(6) 2\_645 . ?  
O106 K7 W28 74.9(5) . . ?  
O103 K7 W28 26.4(4) . . ?  
W30 K7 W28 116.4(3) 2\_645 . ?  
O337 K8 O62 60.4(11) 1\_565 . ?  
O337 K8 O144 93.7(12) 1\_565 1\_565 ?  
O62 K8 O144 143.6(9) . 1\_565 ?  
O337 K8 O119 58.0(11) 1\_565 1\_565 ?  
O62 K8 O119 118.0(8) . 1\_565 ?  
O144 K8 O119 48.2(8) 1\_565 1\_565 ?  
O337 K8 O150 114.4(11) 1\_565 1\_565 ?  
O62 K8 O150 161.2(9) . 1\_565 ?  
O144 K8 O150 50.0(8) 1\_565 1\_565 ?  
O119 K8 O150 57.7(7) 1\_565 1\_565 ?  
O337 K8 O71 68.5(11) 1\_565 . ?  
O62 K8 O71 50.6(8) . . ?  
O144 K8 O71 97.9(9) 1\_565 . ?  
O119 K8 O71 108.9(8) 1\_565 . ?  
O150 K8 O71 147.1(9) 1\_565 . ?  
O337 K8 O328 99.6(15) 1\_565 2 ?  
O62 K8 O328 103.6(13) . 2 ?  
O144 K8 O328 52.6(13) 1\_565 2 ?  
O119 K8 O328 92.4(13) 1\_565 2 ?  
O150 K8 O328 95.0(13) 1\_565 2 ?  
O71 K8 O328 53.5(13) . 2 ?  
O337 K8 O149 78.9(11) 1\_565 1\_565 ?  
O62 K8 O149 113.7(8) . 1\_565 ?  
O144 K8 O149 82.4(8) 1\_565 1\_565 ?  
O119 K8 O149 48.3(7) 1\_565 1\_565 ?  
O150 K8 O149 48.6(7) 1\_565 1\_565 ?  
O71 K8 O149 147.4(8) . 1\_565 ?  
O328 K8 O149 134.9(13) 2 1\_565 ?  
O337 K8 O310 115.8(16) 1\_565 . ?  
O62 K8 O310 55.8(13) . . ?  
O144 K8 O310 144.3(14) 1\_565 . ?  
O119 K8 O310 166.8(14) 1\_565 . ?  
O150 K8 O310 123.6(14) 1\_565 . ?  
O71 K8 O310 76.8(13) . . ?

O328 K8 O310 100.5(17) 2 . ?  
O149 K8 O310 121.0(13) 1\_565 . ?  
O337 K8 W17 61.0(10) 1\_565 . ?  
O62 K8 W17 26.2(5) . . ?  
O144 K8 W17 120.3(7) 1\_565 . ?  
O119 K8 W17 115.1(6) 1\_565 . ?  
O150 K8 W17 170.0(7) 1\_565 . ?  
O71 K8 W17 24.5(6) . . ?  
O328 K8 W17 77.7(12) 2 . ?  
O149 K8 W17 133.6(6) 1\_565 . ?  
O310 K8 W17 65.1(12) . . ?  
O337 K8 W38 115.1(10) 1\_565 1\_565 ?  
O62 K8 W38 169.5(7) . 1\_565 ?  
O144 K8 W38 26.5(6) 1\_565 1\_565 ?  
O119 K8 W38 59.5(6) 1\_565 1\_565 ?  
O150 K8 W38 28.1(5) 1\_565 1\_565 ?  
O71 K8 W38 119.3(7) . 1\_565 ?  
O328 K8 W38 67.1(12) 2 1\_565 ?  
O149 K8 W38 72.9(5) 1\_565 1\_565 ?  
O310 K8 W38 129.0(13) . 1\_565 ?  
W17 K8 W38 143.6(4) . 1\_565 ?  
O218 K9 O22 142.2(11) . 1\_455 ?  
O218 K9 O15 130.7(11) . 1\_455 ?  
O22 K9 O15 56.4(9) 1\_455 1\_455 ?  
O218 K9 O358 66.6(13) . 1\_455 ?  
O22 K9 O358 76.5(13) 1\_455 1\_455 ?  
O15 K9 O358 111.4(13) 1\_455 1\_455 ?  
O218 K9 O348 78.1(16) . 1\_465 ?  
O22 K9 O348 128.7(16) 1\_455 1\_465 ?  
O15 K9 O348 130.7(15) 1\_455 1\_465 ?  
O358 K9 O348 117.3(18) 1\_455 1\_465 ?  
O218 K9 O210 58.3(11) . . ?  
O22 K9 O210 113.2(11) 1\_455 . ?  
O15 K9 O210 72.4(10) 1\_455 . ?  
O358 K9 O210 86.8(14) 1\_455 . ?  
O348 K9 O210 116.5(16) 1\_465 . ?  
O218 K9 O11 151.3(11) . 1\_455 ?  
O22 K9 O11 66.4(8) 1\_455 1\_455 ?  
O15 K9 O11 54.2(9) 1\_455 1\_455 ?  
O358 K9 O11 141.8(13) 1\_455 1\_455 ?  
O348 K9 O11 81.7(15) 1\_465 1\_455 ?  
O210 K9 O11 115.4(11) . 1\_455 ?  
O218 K9 O16 136.7(11) . 1\_455 ?  
O22 K9 O16 54.7(9) 1\_455 1\_455 ?  
O15 K9 O16 92.5(9) 1\_455 1\_455 ?  
O358 K9 O16 98.0(13) 1\_455 1\_455 ?  
O348 K9 O16 74.1(15) 1\_465 1\_455 ?  
O210 K9 O16 164.9(11) . 1\_455 ?  
O11 K9 O16 53.3(8) 1\_455 1\_455 ?  
O218 K9 W54 32.1(8) . . ?  
O22 K9 W54 128.8(8) 1\_455 . ?  
O15 K9 W54 98.6(7) 1\_455 . ?  
O358 K9 W54 73.3(11) 1\_455 . ?  
O348 K9 W54 101.9(14) 1\_465 . ?  
O210 K9 W54 26.5(8) . . ?  
O11 K9 W54 138.4(7) 1\_455 . ?  
O16 K9 W54 167.8(8) 1\_455 . ?  
O218 K9 W5 132.9(9) . 1\_455 ?  
O22 K9 W5 29.1(7) 1\_455 1\_455 ?  
O15 K9 W5 32.4(6) 1\_455 1\_455 ?  
O358 K9 W5 83.3(11) 1\_455 1\_455 ?  
O348 K9 W5 149.0(14) 1\_465 1\_455 ?  
O210 K9 W5 85.7(8) . 1\_455 ?  
O11 K9 W5 68.8(6) 1\_455 1\_455 ?

O16 K9 W5 80.6(7) 1\_455 1\_455 ?  
W54 K9 W5 106.3(3) . 1\_455 ?  
O218 K9 W3 145.5(9) . 1\_455 ?  
O22 K9 W3 65.3(7) 1\_455 1\_455 ?  
O15 K9 W3 78.6(7) 1\_455 1\_455 ?  
O358 K9 W3 125.3(12) 1\_455 1\_455 ?  
O348 K9 W3 67.7(14) 1\_465 1\_455 ?  
O210 K9 W3 143.3(9) . 1\_455 ?  
O11 K9 W3 28.2(6) 1\_455 1\_455 ?  
O16 K9 W3 27.7(6) 1\_455 1\_455 ?  
W54 K9 W3 161.0(5) . 1\_455 ?  
W5 K9 W3 81.5(2) 1\_455 1\_455 ?  
O218 K9 W2 140.3(9) . 1\_455 ?  
O22 K9 W2 66.2(6) 1\_455 1\_455 ?  
O15 K9 W2 26.9(6) 1\_455 1\_455 ?  
O358 K9 W2 136.1(12) 1\_455 1\_455 ?  
O348 K9 W2 104.2(14) 1\_465 1\_455 ?  
O210 K9 W2 87.3(8) . 1\_455 ?  
O11 K9 W2 30.2(6) 1\_455 1\_455 ?  
O16 K9 W2 79.4(7) 1\_455 1\_455 ?  
W54 K9 W2 112.8(4) . 1\_455 ?  
W5 K9 W2 52.86(17) 1\_455 1\_455 ?  
W3 K9 W2 57.76(18) 1\_455 1\_455 ?  
W60 K11 O206 126(2) . . ?  
W60 K11 O228 73.7(18) . . ?  
O206 K11 O228 150(3) . . ?  
W60 K11 O222 64.4(13) . . ?  
O206 K11 O222 113(3) . . ?  
O228 K11 O222 96(2) . . ?  
W60 K11 O225 51.9(11) . . ?  
O206 K11 O225 91(2) . . ?  
O228 K11 O225 85.6(19) . . ?  
O222 K11 O225 113.0(15) . . ?  
W60 K11 O216 59.4(11) . . ?  
O206 K11 O216 73(2) . . ?  
O228 K11 O216 132.9(19) . . ?  
O222 K11 O216 61.7(14) . . ?  
O225 K11 O216 69.5(13) . . ?  
W60 K11 W55 105.9(9) . . ?  
O206 K11 W55 27(2) . . ?  
O228 K11 W55 174.0(17) . . ?  
O222 K11 W55 89.4(13) . . ?  
O225 K11 W55 89.5(10) . . ?  
O216 K11 W55 47.6(9) . . ?  
W60 K11 O220 103.7(8) . . ?  
O206 K11 O220 58(2) . . ?  
O228 K11 O220 146.9(17) . . ?  
O222 K11 O220 56.1(12) . . ?  
O225 K11 O220 119.4(10) . . ?  
O216 K11 O220 52.8(9) . . ?  
W55 K11 O220 39.01(19) . . ?  
W60 K11 O317 171.4(15) . . ?  
O206 K11 O317 60(2) . . ?  
O228 K11 O317 103(2) . . ?  
O222 K11 O317 108.3(17) . . ?  
O225 K11 O317 136.5(15) . . ?  
O216 K11 O317 122.4(15) . . ?  
W55 K11 O317 77.8(12) . . ?  
O220 K11 O317 74.2(12) . . ?  
W60 K11 W56 73.3(7) . . ?  
O206 K11 W56 86(2) . . ?  
O228 K11 W56 124.1(17) . . ?  
O222 K11 W56 28.8(12) . . ?  
O225 K11 W56 106.9(10) . . ?

O216 K11 W56 40.1(8) . . ?  
W55 K11 W56 60.8(3) . . ?  
O220 K11 W56 32.50(14) . . ?  
O317 K11 W56 102.7(12) . . ?  
W60 K11 Na10 123.2(11) . . ?  
O206 K11 Na10 15(2) . . ?  
O228 K11 Na10 161.6(18) . . ?  
O222 K11 Na10 98.6(14) . . ?  
O225 K11 Na10 99.3(11) . . ?  
O216 K11 Na10 64.8(10) . . ?  
W55 K11 Na10 17.3(4) . . ?  
O220 K11 Na10 43.0(5) . . ?  
O317 K11 Na10 61.1(12) . . ?  
W56 K11 Na10 71.6(5) . . ?  
W60 K11 Cs7 1.5(7) . . ?  
O206 K11 Cs7 128(2) . . ?  
O228 K11 Cs7 72.2(16) . . ?  
O222 K11 Cs7 65.0(12) . . ?  
O225 K11 Cs7 51.9(9) . . ?  
O216 K11 Cs7 60.9(9) . . ?  
W55 K11 Cs7 107.3(4) . . ?  
O220 K11 Cs7 105.0(4) . . ?  
O317 K11 Cs7 171.0(12) . . ?  
W56 K11 Cs7 74.4(3) . . ?  
Na10 K11 Cs7 124.6(6) . . ?  
O334 K2 O86 120.8(11) 2 1\_565 ?  
O334 K2 O337 120.0(14) 2 1\_565 ?  
O86 K2 O337 66.9(11) 1\_565 1\_565 ?  
O334 K2 O135 136.7(12) 2 1\_565 ?  
O86 K2 O135 102.6(10) 1\_565 1\_565 ?  
O337 K2 O135 74.7(12) 1\_565 1\_565 ?  
O334 K2 O61 59.7(10) 2 . ?  
O86 K2 O61 96.4(9) 1\_565 . ?  
O337 K2 O61 60.3(12) 1\_565 . ?  
O135 K2 O61 118.3(10) 1\_565 . ?  
O334 K2 W26 129.0(9) 2 1\_565 ?  
O86 K2 W26 19.0(6) 1\_565 1\_565 ?  
O337 K2 W26 78.8(10) 1\_565 1\_565 ?  
O135 K2 W26 92.5(7) 1\_565 1\_565 ?  
O61 K2 W26 115.4(7) . 1\_565 ?  
O390 K3 O377 60.2(17) . . ?  
O390 K3 O15 81.4(17) . 1\_455 ?  
O377 K3 O15 141.5(11) . 1\_455 ?  
O390 K3 Cs5 119.5(16) . . ?  
O377 K3 Cs5 97.3(8) . . ?  
O15 K3 Cs5 104.7(8) 1\_455 . ?  
O390 K3 O210 57.5(17) . . ?  
O377 K3 O210 87.8(11) . . ?  
O15 K3 O210 72.7(11) 1\_455 . ?  
Cs5 K3 O210 67.1(8) . . ?  
O390 K3 O139 126.0(17) . . ?  
O377 K3 O139 89.6(9) . . ?  
O15 K3 O139 112.9(10) 1\_455 . ?  
Cs5 K3 O139 107.0(8) . . ?  
O210 K3 O139 173.2(12) . . ?  
O390 K3 O140 122.1(17) . . ?  
O377 K3 O140 61.9(9) . . ?  
O15 K3 O140 156.5(10) 1\_455 . ?  
Cs5 K3 O140 67.4(6) . . ?  
O210 K3 O140 120.0(11) . . ?  
O139 K3 O140 53.3(8) . . ?  
O390 K3 O346 47.8(17) . . ?  
O377 K3 O346 63.5(10) . . ?  
O15 K3 O346 89.3(11) 1\_455 . ?

Cs5 K3 O346 160.1(9) . . ?  
O210 K3 O346 104.9(12) . . ?  
O139 K3 O346 79.5(10) . . ?  
O140 K3 O346 104.7(10) . . ?  
O390 K3 O21 123.7(17) . 1\_455 ?  
O377 K3 O21 157.4(9) . 1\_455 ?  
O15 K3 O21 47.7(8) 1\_455 1\_455 ?  
Cs5 K3 O21 98.4(6) . 1\_455 ?  
O210 K3 O21 113.4(10) . 1\_455 ?  
O139 K3 O21 70.2(8) . 1\_455 ?  
O140 K3 O21 110.0(8) . 1\_455 ?  
O346 K3 O21 101.6(10) . 1\_455 ?  
O390 K3 W36 122.7(16) . . ?  
O377 K3 W36 70.6(7) . . ?  
O15 K3 W36 137.7(8) 1\_455 . ?  
Cs5 K3 W36 92.9(5) . . ?  
O210 K3 W36 148.8(9) . . ?  
O139 K3 W36 25.0(6) . . ?  
O140 K3 W36 29.6(5) . . ?  
O346 K3 W36 85.7(8) . . ?  
O21 K3 W36 92.4(6) 1\_455 . ?  
O390 K3 W5 111.3(16) . 1\_455 ?  
O377 K3 W5 170.7(9) . 1\_455 ?  
O15 K3 W5 30.8(6) 1\_455 1\_455 ?  
Cs5 K3 W5 83.6(4) . 1\_455 ?  
O210 K3 W5 84.0(8) . 1\_455 ?  
O139 K3 W5 99.1(7) . 1\_455 ?  
O140 K3 W5 126.4(7) . 1\_455 ?  
O346 K3 W5 114.5(9) . 1\_455 ?  
O21 K3 W5 29.6(5) 1\_455 1\_455 ?  
W36 K3 W5 118.7(4) . 1\_455 ?  
O390 K3 W2 69.7(16) . 1\_455 ?  
O377 K3 W2 123.7(8) . 1\_455 ?  
O15 K3 W2 25.6(6) 1\_455 1\_455 ?  
Cs5 K3 W2 130.3(5) . 1\_455 ?  
O210 K3 W2 86.0(9) . 1\_455 ?  
O139 K3 W2 100.7(7) . 1\_455 ?  
O140 K3 W2 153.9(7) . 1\_455 ?  
O346 K3 W2 64.4(8) . 1\_455 ?  
O21 K3 W2 54.0(5) 1\_455 1\_455 ?  
W36 K3 W2 124.5(4) . 1\_455 ?  
W5 K3 W2 51.45(19) 1\_455 1\_455 ?  
W52 K12 O215 161(2) . . ?  
W52 K12 O217 86.5(17) . . ?  
O215 K12 O217 112(2) . . ?  
W52 K12 O200 79.5(16) . . ?  
O215 K12 O200 101(2) . . ?  
O217 K12 O200 98.0(18) . . ?  
W52 K12 O134 69.0(13) . . ?  
O215 K12 O134 107.5(19) . . ?  
O217 K12 O134 85.4(18) . . ?  
O200 K12 O134 148.1(16) . . ?  
W52 K12 O198 55.3(13) . . ?  
O215 K12 O198 106(2) . . ?  
O217 K12 O198 141.4(17) . . ?  
O200 K12 O198 82.0(16) . . ?  
O134 K12 O198 76.1(15) . . ?  
W52 K12 W58 134.5(15) . . ?  
O215 K12 W58 63.8(15) . . ?  
O217 K12 W58 48.0(13) . . ?  
O200 K12 W58 103.3(12) . . ?  
O134 K12 W58 102.3(13) . . ?  
O198 K12 W58 169.2(13) . . ?  
W52 K12 O199 16.2(11) . . ?

O215 K12 O199 176(2) . . ?  
O217 K12 O199 71.6(16) . . ?  
O200 K12 O199 76.2(14) . . ?  
O134 K12 O199 74.8(13) . . ?  
O198 K12 O199 70.9(14) . . ?  
W58 K12 O199 119.3(11) . . ?  
W52 K12 W57 123.2(15) . . ?  
O215 K12 W57 56.1(15) . . ?  
O217 K12 W57 108.3(14) . . ?  
O200 K12 W57 44.9(11) . . ?  
O134 K12 W57 161.3(13) . . ?  
O198 K12 W57 98.8(13) . . ?  
W58 K12 W57 79.3(4) . . ?  
O199 K12 W57 121.0(11) . . ?  
W52 K12 O221 132.5(15) . . ?  
O215 K12 O221 61.9(16) . . ?  
O217 K12 O221 67.8(15) . . ?  
O200 K12 O221 66.2(14) . . ?  
O134 K12 O221 141.5(16) . . ?  
O198 K12 O221 141.4(16) . . ?  
W58 K12 O221 39.2(8) . . ?  
O199 K12 O221 118.5(13) . . ?  
W57 K12 O221 43.2(9) . . ?  
W52 K12 As6 134.4(13) . . ?  
O215 K12 As6 29.0(14) . . ?  
O217 K12 As6 130.1(15) . . ?  
O200 K12 As6 114.2(13) . . ?  
O134 K12 As6 85.9(11) . . ?  
O198 K12 As6 82.6(11) . . ?  
W58 K12 As6 86.7(5) . . ?  
O199 K12 As6 150.1(11) . . ?  
W57 K12 As6 75.6(4) . . ?  
O221 K12 As6 90.8(9) . . ?  
W52 K12 O224 123.9(16) . . ?  
O215 K12 O224 67.2(17) . . ?  
O217 K12 O224 57.5(15) . . ?  
O200 K12 O224 140.5(14) . . ?  
O134 K12 O224 66.8(13) . . ?  
O198 K12 O224 137.0(14) . . ?  
W58 K12 O224 37.2(7) . . ?  
O199 K12 O224 116.8(13) . . ?  
W57 K12 O224 109.3(8) . . ?  
O221 K12 O224 75.4(11) . . ?  
As6 K12 O224 74.0(8) . . ?  
O27 As1 O26 99.4(12) . . ?  
O27 As1 O25 96.2(12) . . ?  
O26 As1 O25 97.6(12) . . ?  
O49 As2 O48 99.6(11) . . ?  
O49 As2 O47 97.5(11) . . ?  
O48 As2 O47 94.4(11) . . ?  
O389 As3 O101 96.6(11) . . ?  
O389 As3 O102 99.5(12) . . ?  
O101 As3 O102 96.1(11) . . ?  
O142 As4 O143 94.0(13) . . ?  
O142 As4 O141 96.3(12) . . ?  
O143 As4 O141 100.4(12) . . ?  
O175 As5 O174 96.7(13) . . ?  
O175 As5 O176 98.0(13) . . ?  
O174 As5 O176 96.2(13) . . ?  
O216 As6 O214 98.9(17) . . ?  
O216 As6 O215 99.0(17) . . ?  
O214 As6 O215 96.6(16) . . ?  
O216 As6 K12 123.2(13) . . ?  
O214 As6 K12 87.5(11) . . ?

O215 As6 K12 24.7(12) . . ?  
O216 As6 Cs8 72.7(13) . . ?  
O214 As6 Cs8 136.5(11) . . ?  
O215 As6 Cs8 45.7(12) . . ?  
K12 As6 Cs8 65.1(4) . . ?  
O216 As6 Cs7 64.4(14) . . ?  
O214 As6 Cs7 79.9(11) . . ?  
O215 As6 Cs7 41.8(12) . . ?  
K12 As6 Cs7 61.4(5) . . ?  
Cs8 As6 Cs7 57.7(3) . . ?  
O362 As7 O361 103.0(18) . . ?  
O362 As7 O363 94.2(17) . . ?  
O361 As7 O363 95.9(16) . . ?  
O289 As8 O287 96.2(15) . . ?  
O289 As8 O288 98.9(13) . . ?  
O287 As8 O288 98.2(14) . . ?  
W58 Cs7 O224 61.9(11) . . ?  
W58 Cs7 O227 50.2(14) . . ?  
O224 Cs7 O227 79.3(17) . . ?  
W58 Cs7 O221 55.5(11) . . ?  
O224 Cs7 O221 114.6(16) . . ?  
O227 Cs7 O221 75.5(18) . . ?  
W58 Cs7 W60 160.3(8) . . ?  
O224 Cs7 W60 104.6(11) . . ?  
O227 Cs7 W60 145.7(15) . . ?  
O221 Cs7 W60 128.9(12) . . ?  
W58 Cs7 O215 64.9(10) . . ?  
O224 Cs7 O215 75.9(13) . . ?  
O227 Cs7 O215 114.8(17) . . ?  
O221 Cs7 O215 62.7(13) . . ?  
W60 Cs7 O215 98.9(9) . . ?  
W58 Cs7 O225 123.8(11) . . ?  
O224 Cs7 O225 62.8(12) . . ?  
O227 Cs7 O225 125.8(17) . . ?  
O221 Cs7 O225 154.2(14) . . ?  
W60 Cs7 O225 42.1(8) . . ?  
O215 Cs7 O225 92.8(12) . . ?  
W58 Cs7 O217 10.1(8) . . ?  
O224 Cs7 O217 56.9(12) . . ?  
O227 Cs7 O217 59.6(16) . . ?  
O221 Cs7 O217 58.2(12) . . ?  
W60 Cs7 O217 150.3(8) . . ?  
O215 Cs7 O217 56.2(11) . . ?  
O225 Cs7 O217 116.5(11) . . ?  
W58 Cs7 O314 110.3(10) . . ?  
O224 Cs7 O314 171.6(13) . . ?  
O227 Cs7 O314 93.4(15) . . ?  
O221 Cs7 O314 59.0(12) . . ?  
W60 Cs7 O314 83.7(8) . . ?  
O215 Cs7 O314 103.8(11) . . ?  
O225 Cs7 O314 125.4(11) . . ?  
O217 Cs7 O314 115.9(10) . . ?  
W58 Cs7 O216 117.0(10) . . ?  
O224 Cs7 O216 93.0(12) . . ?  
O227 Cs7 O216 167.1(16) . . ?  
O221 Cs7 O216 98.8(13) . . ?  
W60 Cs7 O216 46.2(7) . . ?  
O215 Cs7 O216 52.8(11) . . ?  
O225 Cs7 O216 57.1(11) . . ?  
O217 Cs7 O216 107.6(10) . . ?  
O314 Cs7 O216 93.4(10) . . ?  
W58 Cs7 O222 147.1(11) . . ?  
O224 Cs7 O222 132.6(13) . . ?  
O227 Cs7 O222 146.0(16) . . ?



O221 Cs7 O222 96.0(13) . . ?  
W60 Cs7 O222 33.4(7) . . ?  
O215 Cs7 O222 88.5(12) . . ?  
O225 Cs7 O222 73.8(11) . . ?  
O217 Cs7 O222 142.3(11) . . ?  
O314 Cs7 O222 55.5(10) . . ?  
O216 Cs7 O222 45.0(10) . . ?  
W58 Cs7 Cs8 85.8(7) . . ?  
O224 Cs7 Cs8 120.8(11) . . ?  
O227 Cs7 Cs8 117.7(15) . . ?  
O221 Cs7 Cs8 42.1(11) . . ?  
W60 Cs7 Cs8 90.1(5) . . ?  
O215 Cs7 Cs8 44.9(8) . . ?  
O225 Cs7 Cs8 114.7(9) . . ?  
O217 Cs7 Cs8 82.5(8) . . ?  
O314 Cs7 Cs8 59.1(7) . . ?  
O216 Cs7 Cs8 57.6(8) . . ?  
O222 Cs7 Cs8 61.4(8) . . ?  
O203 Cs8 W57 169(3) . . ?  
O203 Cs8 O201 130(3) . . ?  
W57 Cs8 O201 60.0(12) . . ?  
O203 Cs8 O202 121(3) . . ?  
W57 Cs8 O202 50.6(11) . . ?  
O201 Cs8 O202 81.1(16) . . ?  
O203 Cs8 O221 107(3) . . ?  
W57 Cs8 O221 65.3(12) . . ?  
O201 Cs8 O221 122.3(16) . . ?  
O202 Cs8 O221 78.1(15) . . ?  
O203 Cs8 O215 116(3) . . ?  
W57 Cs8 O215 69.9(11) . . ?  
O201 Cs8 O215 78.8(14) . . ?  
O202 Cs8 O215 119.3(15) . . ?  
O221 Cs8 O215 66.4(14) . . ?  
O203 Cs8 W56 33(2) . . ?  
W57 Cs8 W56 158.2(9) . . ?  
O201 Cs8 W56 99.9(12) . . ?  
O202 Cs8 W56 140.3(12) . . ?  
O221 Cs8 W56 129.2(12) . . ?  
O215 Cs8 W56 99.5(10) . . ?  
O203 Cs8 O204 67(3) . . ?  
W57 Cs8 O204 123.4(11) . . ?  
O201 Cs8 O204 63.8(13) . . ?  
O202 Cs8 O204 126.1(15) . . ?  
O221 Cs8 O204 155.2(14) . . ?  
O215 Cs8 O204 93.6(12) . . ?  
W56 Cs8 O204 36.1(7) . . ?  
O203 Cs8 O200 167(3) . . ?  
W57 Cs8 O200 13.3(8) . . ?  
O201 Cs8 O200 62.1(13) . . ?  
O202 Cs8 O200 63.2(12) . . ?  
O221 Cs8 O200 60.4(12) . . ?  
O215 Cs8 O200 56.7(11) . . ?  
W56 Cs8 O200 151.1(8) . . ?  
O204 Cs8 O200 121.9(10) . . ?  
O203 Cs8 O216 65(2) . . ?  
W57 Cs8 O216 123.5(10) . . ?  
O201 Cs8 O216 94.3(13) . . ?  
O202 Cs8 O216 173.8(13) . . ?  
O221 Cs8 O216 101.2(13) . . ?  
O215 Cs8 O216 55.4(11) . . ?  
W56 Cs8 O216 44.4(7) . . ?  
O204 Cs8 O216 54.1(11) . . ?  
O200 Cs8 O216 111.0(10) . . ?  
O203 Cs8 As6 96(2) . . ?

W57 Cs8 As6 93.2(7) . . ?  
O201 Cs8 As6 70.3(11) . . ?  
O202 Cs8 As6 142.4(12) . . ?  
O221 Cs8 As6 96.8(11) . . ?  
O215 Cs8 As6 32.8(9) . . ?  
W56 Cs8 As6 70.5(3) . . ?  
O204 Cs8 As6 61.3(8) . . ?  
O200 Cs8 As6 81.7(7) . . ?  
O216 Cs8 As6 31.4(7) . . ?  
O203 Cs8 O393 62(3) . . ?  
W57 Cs8 O393 113.1(15) . . ?  
O201 Cs8 O393 101.1(17) . . ?  
O202 Cs8 O393 64.0(16) . . ?  
O221 Cs8 O393 116.1(17) . . ?  
O215 Cs8 O393 176.6(16) . . ?  
W56 Cs8 O393 77.1(13) . . ?  
O204 Cs8 O393 83.3(15) . . ?  
O200 Cs8 O393 126.4(14) . . ?  
O216 Cs8 O393 121.3(15) . . ?  
As6 Cs8 O393 144.0(13) . . ?  
O58 Cs1 O56 100.2(7) . . ?  
O58 Cs1 O79 64.7(7) . . ?  
O56 Cs1 O79 122.5(8) . . ?  
O58 Cs1 O66 116.5(7) . 2 ?  
O56 Cs1 O66 107.5(8) . 2 ?  
O79 Cs1 O66 129.3(8) . 2 ?  
O58 Cs1 O121 134.3(7) . . ?  
O56 Cs1 O121 74.8(8) . . ?  
O79 Cs1 O121 79.7(7) . . ?  
O66 Cs1 O121 108.0(7) 2 . ?  
O58 Cs1 O70 158.3(7) . 2 ?  
O56 Cs1 O70 73.3(7) . 2 ?  
O79 Cs1 O70 136.5(7) . 2 ?  
O66 Cs1 O70 49.6(7) 2 2 ?  
O121 Cs1 O70 65.1(7) . 2 ?  
O58 Cs1 O45 51.5(6) . . ?  
O56 Cs1 O45 51.1(7) . . ?  
O79 Cs1 O45 105.1(7) . . ?  
O66 Cs1 O45 112.7(7) 2 . ?  
O121 Cs1 O45 119.1(6) . . ?  
O70 Cs1 O45 114.0(7) 2 . ?  
O58 Cs1 O69 81.4(7) . 2 ?  
O56 Cs1 O69 155.5(8) . 2 ?  
O79 Cs1 O69 80.6(8) . 2 ?  
O66 Cs1 O69 52.1(7) 2 2 ?  
O121 Cs1 O69 121.5(7) . 2 ?  
O70 Cs1 O69 96.1(7) 2 2 ?  
O45 Cs1 O69 119.1(7) . 2 ?  
O58 Cs1 O324 76.6(5) . . ?  
O56 Cs1 O324 72.9(6) . . ?  
O79 Cs1 O324 139.9(6) . . ?  
O66 Cs1 O324 60.0(5) 2 . ?  
O121 Cs1 O324 138.9(5) . . ?  
O70 Cs1 O324 81.7(5) 2 . ?  
O45 Cs1 O324 52.8(4) . . ?  
O69 Cs1 O324 83.9(6) 2 . ?  
O58 Cs1 O326 116.4(10) . . ?  
O56 Cs1 O326 138.3(10) . . ?  
O79 Cs1 O326 63.6(10) . . ?  
O66 Cs1 O326 74.3(10) 2 . ?  
O121 Cs1 O326 65.7(10) . . ?  
O70 Cs1 O326 78.5(10) 2 . ?  
O45 Cs1 O326 167.6(10) . . ?  
O69 Cs1 O326 56.2(11) 2 . ?

O324 Cs1 O326 132.4(9) . . ?  
O58 Cs1 O110 59.6(6) . . ?  
O56 Cs1 O110 72.2(7) . . ?  
O79 Cs1 O110 51.8(6) . . ?  
O66 Cs1 O110 175.7(6) 2 . ?  
O121 Cs1 O110 76.2(6) . . ?  
O70 Cs1 O110 133.3(6) 2 . ?  
O45 Cs1 O110 63.7(6) . . ?  
O69 Cs1 O110 127.0(6) 2 . ?  
O324 Cs1 O110 116.2(4) . . ?  
O326 Cs1 O110 108.9(10) . . ?  
O58 Cs1 W13 23.2(5) . . ?  
O56 Cs1 W13 78.1(6) . . ?  
O79 Cs1 W13 82.9(6) . . ?  
O66 Cs1 W13 117.3(5) 2 . ?  
O121 Cs1 W13 132.3(5) . . ?  
O70 Cs1 W13 139.9(5) 2 . ?  
O45 Cs1 W13 28.3(4) . . ?  
O69 Cs1 W13 98.6(6) 2 . ?  
O324 Cs1 W13 63.24(5) . . ?  
O326 Cs1 W13 139.6(9) . . ?  
O110 Cs1 W13 58.4(3) . . ?  
O37 Cs2 O113 174.5(8) . . ?  
O37 Cs2 O109 94.9(7) . . ?  
O113 Cs2 O109 89.8(6) . . ?  
O37 Cs2 O157 84.8(7) . . ?  
O113 Cs2 O157 96.1(6) . . ?  
O109 Cs2 O157 50.0(6) . . ?  
O37 Cs2 O160 129.4(8) . . ?  
O113 Cs2 O160 53.0(6) . . ?  
O109 Cs2 O160 92.7(6) . . ?  
O157 Cs2 O160 134.4(6) . . ?  
O37 Cs2 O359 80.7(14) . . ?  
O113 Cs2 O359 94.1(13) . . ?  
O109 Cs2 O359 168.4(13) . . ?  
O157 Cs2 O359 118.6(13) . . ?  
O160 Cs2 O359 98.4(13) . . ?  
O37 Cs2 O93 76.4(8) . . ?  
O113 Cs2 O93 100.1(6) . . ?  
O109 Cs2 O93 98.4(6) . . ?  
O157 Cs2 O93 48.4(6) . . ?  
O160 Cs2 O93 151.0(6) . . ?  
O359 Cs2 O93 70.2(13) . . ?  
O37 Cs2 O76 60.7(8) . . ?  
O113 Cs2 O76 122.7(7) . . ?  
O109 Cs2 O76 87.1(7) . . ?  
O157 Cs2 O76 123.1(7) . . ?  
O160 Cs2 O76 69.9(7) . . ?  
O359 Cs2 O76 99.9(14) . . ?  
O93 Cs2 O76 137.0(7) . . ?  
O37 Cs2 O91 122.1(8) . . ?  
O113 Cs2 O91 54.6(6) . . ?  
O109 Cs2 O91 92.5(6) . . ?  
O157 Cs2 O91 58.2(6) . . ?  
O160 Cs2 O91 107.3(6) . . ?  
O359 Cs2 O91 81.0(14) . . ?  
O93 Cs2 O91 45.8(6) . . ?  
O76 Cs2 O91 177.2(7) . . ?  
O37 Cs2 O179 128.5(7) . . ?  
O113 Cs2 O179 48.4(6) . . ?  
O109 Cs2 O179 131.6(6) . . ?  
O157 Cs2 O179 139.2(6) . . ?  
O160 Cs2 O179 45.2(6) . . ?  
O359 Cs2 O179 57.4(13) . . ?

O93 Cs2 O179 110.6(6) . . ?  
O76 Cs2 O179 96.1(7) . . ?  
O91 Cs2 O179 82.2(6) . . ?  
O37 Cs2 O378 69.0(9) . . ?  
O113 Cs2 O378 108.7(9) . . ?  
O109 Cs2 O378 143.3(9) . . ?  
O157 Cs2 O378 149.9(8) . . ?  
O160 Cs2 O378 75.5(8) . . ?  
O359 Cs2 O378 44.6(15) . . ?  
O93 Cs2 O378 108.7(9) . . ?  
O76 Cs2 O378 56.3(10) . . ?  
O91 Cs2 O378 124.1(9) . . ?  
O179 Cs2 O378 60.4(8) . . ?  
O37 Cs2 O72 46.7(7) . . ?  
O113 Cs2 O72 137.3(6) . . ?  
O109 Cs2 O72 48.9(6) . . ?  
O157 Cs2 O72 51.5(6) . . ?  
O160 Cs2 O72 126.9(6) . . ?  
O359 Cs2 O72 124.2(13) . . ?  
O93 Cs2 O72 79.2(6) . . ?  
O76 Cs2 O72 72.7(7) . . ?  
O91 Cs2 O72 109.1(6) . . ?  
O179 Cs2 O72 168.7(6) . . ?  
O378 Cs2 O72 111.9(8) . . ?  
O192 Cs3 O131 71.4(8) . . ?  
O192 Cs3 O304 167.4(9) . . ?  
O131 Cs3 O304 121.0(9) . . ?  
O192 Cs3 O163 88.8(7) . . ?  
O131 Cs3 O163 131.3(8) . . ?  
O304 Cs3 O163 80.7(9) . . ?  
O192 Cs3 O156 93.9(7) . . ?  
O131 Cs3 O156 80.3(7) . . ?  
O304 Cs3 O156 91.1(9) . . ?  
O163 Cs3 O156 146.8(7) . . ?  
O192 Cs3 O307 76.5(7) . . ?  
O131 Cs3 O307 76.1(7) . . ?  
O304 Cs3 O307 102.9(9) . . ?  
O163 Cs3 O307 55.8(7) . . ?  
O156 Cs3 O307 156.3(7) . . ?  
O192 Cs3 O306 127.2(8) . . ?  
O131 Cs3 O306 84.5(9) . . ?  
O304 Cs3 O306 56.1(9) . . ?  
O163 Cs3 O306 72.8(8) . . ?  
O156 Cs3 O306 128.1(9) . . ?  
O307 Cs3 O306 52.0(8) . . ?  
O192 Cs3 O162 99.5(7) . . ?  
O131 Cs3 O162 169.7(8) . . ?  
O304 Cs3 O162 68.4(9) . . ?  
O163 Cs3 O162 51.0(7) . . ?  
O156 Cs3 O162 96.0(7) . . ?  
O307 Cs3 O162 106.8(7) . . ?  
O306 Cs3 O162 105.1(8) . . ?  
O192 Cs3 O115 52.1(6) . . ?  
O131 Cs3 O115 92.0(7) . . ?  
O304 Cs3 O115 125.5(8) . . ?  
O163 Cs3 O115 110.4(7) . . ?  
O156 Cs3 O115 50.0(7) . . ?  
O307 Cs3 O115 128.1(7) . . ?  
O306 Cs3 O115 176.3(8) . . ?  
O162 Cs3 O115 78.4(6) . . ?  
O192 Cs3 O305 142.3(8) . . ?  
O131 Cs3 O305 76.5(8) . . ?  
O304 Cs3 O305 49.6(9) . . ?  
O163 Cs3 O305 127.8(8) . . ?

O156 Cs3 O305 61.3(8) . . ?  
O307 Cs3 O305 114.3(8) . . ?  
O306 Cs3 O305 66.9(9) . . ?  
O162 Cs3 O305 110.3(8) . . ?  
O115 Cs3 O305 111.3(8) . . ?  
O192 Cs3 O161 53.1(6) . . ?  
O131 Cs3 O161 124.4(8) . . ?  
O304 Cs3 O161 114.6(8) . . ?  
O163 Cs3 O161 57.1(7) . . ?  
O156 Cs3 O161 99.1(7) . . ?  
O307 Cs3 O161 92.4(7) . . ?  
O306 Cs3 O161 129.7(8) . . ?  
O162 Cs3 O161 46.4(7) . . ?  
O115 Cs3 O161 53.4(6) . . ?  
O305 Cs3 O161 150.5(7) . . ?  
O192 Cs3 O112 113.0(7) . . ?  
O131 Cs3 O112 131.0(7) . . ?  
O304 Cs3 O112 62.0(8) . . ?  
O163 Cs3 O112 97.6(7) . . ?  
O156 Cs3 O112 51.1(7) . . ?  
O307 Cs3 O112 152.6(7) . . ?  
O306 Cs3 O112 118.1(8) . . ?  
O162 Cs3 O112 47.5(7) . . ?  
O115 Cs3 O112 63.6(7) . . ?  
O305 Cs3 O112 74.7(8) . . ?  
O161 Cs3 O112 75.8(7) . . ?  
K3 Cs5 O207 85(2) . . ?  
K3 Cs5 O129 100.1(6) . . ?  
O207 Cs5 O129 100(2) . . ?  
K3 Cs5 O5 70.1(7) . 1\_455 ?  
O207 Cs5 O5 70(2) . 1\_455 ?  
O129 Cs5 O5 165.6(9) . 1\_455 ?  
K3 Cs5 O210 56.7(8) . . ?  
O207 Cs5 O210 134(2) . . ?  
O129 Cs5 O210 109.8(9) . . ?  
O5 Cs5 O210 74.3(10) 1\_455 . ?  
K3 Cs5 O140 58.7(6) . . ?  
O207 Cs5 O140 67(2) . . ?  
O129 Cs5 O140 52.0(7) . . ?  
O5 Cs5 O140 113.9(8) 1\_455 . ?  
O210 Cs5 O140 105.1(9) . . ?  
K3 Cs5 O209 106.0(8) . . ?  
O207 Cs5 O209 149(2) . . ?  
O129 Cs5 O209 107.1(9) . . ?  
O5 Cs5 O209 86.2(10) 1\_455 . ?  
O210 Cs5 O209 49.5(9) . . ?  
O140 Cs5 O209 143.9(8) . . ?  
K3 Cs5 Na10 145.2(6) . . ?  
O207 Cs5 Na10 119(2) . . ?  
O129 Cs5 Na10 99.6(7) . . ?  
O5 Cs5 Na10 94.1(8) 1\_455 . ?  
O210 Cs5 Na10 89.7(8) . . ?  
O140 Cs5 Na10 150.9(7) . . ?  
O209 Cs5 Na10 40.4(8) . . ?  
K3 Cs5 O211 88.5(6) . . ?  
O207 Cs5 O211 168(2) . . ?  
O129 Cs5 O211 71.5(8) . . ?  
O5 Cs5 O211 117.5(9) 1\_455 . ?  
O210 Cs5 O211 46.5(9) . . ?  
O140 Cs5 O211 100.9(7) . . ?  
O209 Cs5 O211 43.5(8) . . ?  
Na10 Cs5 O211 71.2(7) . . ?  
K3 Cs5 O208 133.8(7) . . ?  
O207 Cs5 O208 140(2) . . ?

O129 Cs5 O208 69.6(8) . . ?  
O5 Cs5 O208 124.7(9) 1\_455 . ?  
O210 Cs5 O208 83.7(9) . . ?  
O140 Cs5 O208 120.7(8) . . ?  
O209 Cs5 O208 43.5(9) . . ?  
Na10 Cs5 O208 34.9(7) . . ?  
O211 Cs5 O208 45.3(8) . . ?  
K3 Cs5 W54 81.0(4) . . ?  
O207 Cs5 W54 159(2) . . ?  
O129 Cs5 W54 98.2(6) . . ?  
O5 Cs5 W54 90.8(7) 1\_455 . ?  
O210 Cs5 W54 26.1(7) . . ?  
O140 Cs5 W54 117.1(5) . . ?  
O209 Cs5 W54 28.8(6) . . ?  
Na10 Cs5 W54 68.1(5) . . ?  
O211 Cs5 W54 26.8(5) . . ?  
O208 Cs5 W54 57.6(6) . . ?  
K3 Cs5 W35 83.4(3) . . ?  
O207 Cs5 W35 81(2) . . ?  
O129 Cs5 W35 24.3(5) . . ?  
O5 Cs5 W35 141.3(7) 1\_455 . ?  
O210 Cs5 W35 114.3(7) . . ?  
O140 Cs5 W35 28.4(5) . . ?  
O209 Cs5 W35 129.2(7) . . ?  
Na10 Cs5 W35 122.5(5) . . ?  
O211 Cs5 W35 88.5(6) . . ?  
O208 Cs5 W35 93.9(6) . . ?  
W54 Cs5 W35 112.9(2) . . ?  
O172 Cs6 O246 126.2(11) 1\_545 . ?  
O172 Cs6 O213 69.3(9) 1\_545 1\_545 ?  
O246 Cs6 O213 138.6(11) . 1\_545 ?  
O172 Cs6 O282 65.9(10) 1\_545 . ?  
O246 Cs6 O282 74.5(11) . . ?  
O213 Cs6 O282 135.2(10) 1\_545 . ?  
O172 Cs6 O313 141.9(12) 1\_545 1\_545 ?  
O246 Cs6 O313 91.2(13) . 1\_545 ?  
O213 Cs6 O313 77.7(11) 1\_545 1\_545 ?  
O282 Cs6 O313 142.1(12) . 1\_545 ?  
O172 Cs6 O199 87.5(10) 1\_545 1\_545 ?  
O246 Cs6 O199 122.0(11) . 1\_545 ?  
O213 Cs6 O199 94.2(9) 1\_545 1\_545 ?  
O282 Cs6 O199 82.0(10) . 1\_545 ?  
O313 Cs6 O199 76.3(12) 1\_545 1\_545 ?  
O172 Cs6 O134 90.3(9) 1\_545 1\_545 ?  
O246 Cs6 O134 143.5(10) . 1\_545 ?  
O213 Cs6 O134 48.1(8) 1\_545 1\_545 ?  
O282 Cs6 O134 129.1(10) . 1\_545 ?  
O313 Cs6 O134 52.7(11) 1\_545 1\_545 ?  
O199 Cs6 O134 51.1(9) 1\_545 1\_545 ?  
O172 Cs6 W52 88.4(7) 1\_545 1\_545 ?  
O246 Cs6 W52 137.2(9) . 1\_545 ?  
O213 Cs6 W52 72.1(6) 1\_545 1\_545 ?  
O282 Cs6 W52 104.1(8) . 1\_545 ?  
O313 Cs6 W52 63.2(10) 1\_545 1\_545 ?  
O199 Cs6 W52 23.9(7) 1\_545 1\_545 ?  
O134 Cs6 W52 27.3(6) 1\_545 1\_545 ?  
O172 Cs6 W53 81.4(7) 1\_545 1\_545 ?  
O246 Cs6 W53 144.7(9) . 1\_545 ?  
O213 Cs6 W53 22.7(6) 1\_545 1\_545 ?  
O282 Cs6 W53 140.8(8) . 1\_545 ?  
O313 Cs6 W53 61.4(10) 1\_545 1\_545 ?  
O199 Cs6 W53 75.3(7) 1\_545 1\_545 ?  
O134 Cs6 W53 25.9(6) 1\_545 1\_545 ?  
W52 Cs6 W53 51.82(11) 1\_545 1\_545 ?

O172 Cs6 W47 13.4(7) 1\_545 1\_545 ?  
O246 Cs6 W47 139.3(8) . 1\_545 ?  
O213 Cs6 W47 61.9(6) 1\_545 1\_545 ?  
O282 Cs6 W47 73.7(8) . 1\_545 ?  
O313 Cs6 W47 129.3(10) 1\_545 1\_545 ?  
O199 Cs6 W47 77.5(7) 1\_545 1\_545 ?  
O134 Cs6 W47 77.1(6) 1\_545 1\_545 ?  
W52 Cs6 W47 75.59(15) 1\_545 1\_545 ?  
W53 Cs6 W47 70.40(14) 1\_545 1\_545 ?  
O172 Cs6 K6 73.1(7) 1\_545 . ?  
O246 Cs6 K6 97.5(9) . . ?  
O213 Cs6 K6 123.6(7) 1\_545 . ?  
O282 Cs6 K6 38.5(8) . . ?  
O313 Cs6 K6 112.8(10) 1\_545 . ?  
O199 Cs6 K6 43.5(7) 1\_545 . ?  
O134 Cs6 K6 92.9(6) 1\_545 . ?  
W52 Cs6 K6 66.3(2) 1\_545 . ?  
W53 Cs6 K6 113.0(2) 1\_545 . ?  
W47 Cs6 K6 71.9(2) 1\_545 . ?  
O172 Cs6 K12 93.6(7) 1\_545 1\_545 ?  
O246 Cs6 K12 136.0(9) . 1\_545 ?  
O213 Cs6 K12 67.4(6) 1\_545 1\_545 ?  
O282 Cs6 K12 113.0(8) . 1\_545 ?  
O313 Cs6 K12 55.4(10) 1\_545 1\_545 ?  
O199 Cs6 K12 31.8(7) 1\_545 1\_545 ?  
O134 Cs6 K12 20.1(6) 1\_545 1\_545 ?  
W52 Cs6 K12 9.0(2) 1\_545 1\_545 ?  
W53 Cs6 K12 45.8(2) 1\_545 1\_545 ?  
W47 Cs6 K12 80.4(3) 1\_545 1\_545 ?  
K6 Cs6 K12 74.9(3) . 1\_545 ?  
O392 Cs4 O94 106.4(12) . . ?  
O392 Cs4 O19 84.6(11) . 2\_655 ?  
O94 Cs4 O19 137.4(7) . 2\_655 ?  
O392 Cs4 O78 67.7(11) . . ?  
O94 Cs4 O78 49.0(6) . . ?  
O19 Cs4 O78 150.2(7) 2\_655 . ?  
O392 Cs4 O38 66.1(12) . . ?  
O94 Cs4 O38 74.3(7) . . ?  
O19 Cs4 O38 73.1(7) 2\_655 . ?  
O78 Cs4 O38 85.3(7) . . ?  
O392 Cs4 O104 120.2(12) . . ?  
O94 Cs4 O104 48.0(6) . . ?  
O19 Cs4 O104 154.0(7) 2\_655 . ?  
O78 Cs4 O104 55.8(7) . . ?  
O38 Cs4 O104 122.1(7) . . ?  
O392 Cs4 O18 92.5(12) . 2\_655 ?  
O94 Cs4 O18 161.0(8) . 2\_655 ?  
O19 Cs4 O18 45.5(7) 2\_655 2\_655 ?  
O78 Cs4 O18 141.8(7) . 2\_655 ?  
O38 Cs4 O18 117.3(8) . 2\_655 ?  
O104 Cs4 O18 119.6(7) . 2\_655 ?  
O392 Cs4 O95 80.9(12) . . ?  
O94 Cs4 O95 80.5(6) . . ?  
O19 Cs4 O95 142.0(7) 2\_655 . ?  
O78 Cs4 O95 46.4(6) . . ?  
O38 Cs4 O95 129.8(7) . . ?  
O104 Cs4 O95 46.9(7) . . ?  
O18 Cs4 O95 100.1(7) 2\_655 . ?  
O392 Cs4 O13 49.7(11) . 2\_655 ?  
O94 Cs4 O13 154.1(7) . 2\_655 ?  
O19 Cs4 O13 44.4(6) 2\_655 2\_655 ?  
O78 Cs4 O13 114.9(7) . 2\_655 ?  
O38 Cs4 O13 85.0(7) . 2\_655 ?  
O104 Cs4 O13 146.9(7) . 2\_655 ?

O18 Cs4 O13 44.7(7) 2\_655 2\_655 ?  
O95 Cs4 O13 102.0(7) . 2\_655 ?  
O392 Cs4 W8 103.1(10) . 2\_655 ?  
O94 Cs4 W8 142.3(5) . 2\_655 ?  
O19 Cs4 W8 26.0(5) 2\_655 2\_655 ?  
O78 Cs4 W8 168.6(5) . 2\_655 ?  
O38 Cs4 W8 97.3(5) . 2\_655 ?  
O104 Cs4 W8 129.6(5) . 2\_655 ?  
O18 Cs4 W8 28.4(5) 2\_655 2\_655 ?  
O95 Cs4 W8 127.4(5) . 2\_655 ?  
O13 Cs4 W8 54.6(5) 2\_655 2\_655 ?  
O392 Cs4 W23 78.7(11) . . ?  
O94 Cs4 W23 28.1(4) . . ?  
O19 Cs4 W23 139.6(5) 2\_655 . ?  
O78 Cs4 W23 26.9(4) . . ?  
O38 Cs4 W23 66.5(5) . . ?  
O104 Cs4 W23 60.2(5) . . ?  
O18 Cs4 W23 168.1(6) 2\_655 . ?  
O95 Cs4 W23 70.9(5) . . ?  
O13 Cs4 W23 128.1(5) 2\_655 . ?  
W8 Cs4 W23 161.8(2) 2\_655 . ?  
O392 Cs4 W29 124.6(11) . . ?  
O94 Cs4 W29 24.6(5) . . ?  
O19 Cs4 W29 143.6(5) 2\_655 . ?  
O78 Cs4 W29 58.1(5) . . ?  
O38 Cs4 W29 97.5(5) . . ?  
O104 Cs4 W29 27.3(4) . . ?  
O18 Cs4 W29 137.9(6) 2\_655 . ?  
O95 Cs4 W29 70.6(5) . . ?  
O13 Cs4 W29 172.1(5) 2\_655 . ?  
W8 Cs4 W29 132.0(2) 2\_655 . ?  
W23 Cs4 W29 47.56(8) . . ?  
O28 Tb1 O77 142.8(10) . . ?  
O28 Tb1 O34 77.4(9) . . ?  
O77 Tb1 O34 139.7(9) . . ?  
O28 Tb1 O36 81.3(9) . . ?  
O77 Tb1 O36 95.5(9) . . ?  
O34 Tb1 O36 88.7(9) . . ?  
O28 Tb1 O29 73.3(9) . . ?  
O77 Tb1 O29 90.3(10) . . ?  
O34 Tb1 O29 108.9(9) . . ?  
O36 Tb1 O29 144.5(9) . . ?  
O28 Tb1 O37 123.7(10) . . ?  
O77 Tb1 O37 80.8(10) . . ?  
O34 Tb1 O37 71.7(10) . . ?  
O36 Tb1 O37 141.5(10) . . ?  
O29 Tb1 O37 74.0(10) . . ?  
O28 Tb1 O38 74.6(10) . . ?  
O77 Tb1 O38 69.6(10) . . ?  
O34 Tb1 O38 147.1(9) . . ?  
O36 Tb1 O38 70.3(10) . . ?  
O29 Tb1 O38 79.2(10) . . ?  
O37 Tb1 O38 139.6(11) . . ?  
O28 Tb1 O72 142.5(9) . . ?  
O77 Tb1 O72 69.3(9) . . ?  
O34 Tb1 O72 73.2(8) . . ?  
O36 Tb1 O72 75.3(8) . . ?  
O29 Tb1 O72 138.5(8) . . ?  
O37 Tb1 O72 67.5(9) . . ?  
O38 Tb1 O72 122.3(9) . . ?  
O35 Tb2 O73 68.5(9) . . ?  
O35 Tb2 O52 77.7(10) . . ?  
O73 Tb2 O52 120.2(9) . . ?  
O35 Tb2 O53 115.9(10) . . ?



O73 Tb2 O53 79.6(9) . . ?  
O52 Tb2 O53 72.7(10) . . ?  
O35 Tb2 O74 138.6(10) . . ?  
O73 Tb2 O74 152.8(10) . . ?  
O52 Tb2 O74 74.5(10) . . ?  
O53 Tb2 O74 84.1(10) . . ?  
O35 Tb2 O158 139.4(10) . . ?  
O73 Tb2 O158 82.2(9) . . ?  
O52 Tb2 O158 142.8(9) . . ?  
O53 Tb2 O158 84.1(9) . . ?  
O74 Tb2 O158 74.5(10) . . ?  
O35 Tb2 O76 76.9(11) . . ?  
O73 Tb2 O76 77.1(10) . . ?  
O52 Tb2 O76 140.3(11) . . ?  
O53 Tb2 O76 146.6(11) . . ?  
O74 Tb2 O76 106.7(11) . . ?  
O158 Tb2 O76 69.4(10) . . ?  
O35 Tb2 O75 70.3(13) . . ?  
O73 Tb2 O75 130.6(13) . . ?  
O52 Tb2 O75 75.1(14) . . ?  
O53 Tb2 O75 144.5(14) . . ?  
O74 Tb2 O75 73.3(14) . . ?  
O158 Tb2 O75 114.5(13) . . ?  
O76 Tb2 O75 67.8(14) . . ?  
O35 Tb2 K4 125.4(7) . . ?  
O73 Tb2 K4 57.3(6) . . ?  
O52 Tb2 K4 123.1(7) . . ?  
O53 Tb2 K4 50.4(7) . . ?  
O74 Tb2 K4 95.6(8) . . ?  
O158 Tb2 K4 41.7(7) . . ?  
O76 Tb2 K4 96.5(8) . . ?  
O75 Tb2 K4 156.1(11) . . ?  
O114 Tb3 O91 112.4(9) . . ?  
O114 Tb3 O111 69.2(9) . . ?  
O91 Tb3 O111 79.3(9) . . ?  
O114 Tb3 O115 85.1(9) . . ?  
O91 Tb3 O115 148.4(9) . . ?  
O111 Tb3 O115 83.2(9) . . ?  
O114 Tb3 O88 75.2(9) . . ?  
O91 Tb3 O88 71.9(9) . . ?  
O111 Tb3 O88 120.2(9) . . ?  
O115 Tb3 O88 139.6(9) . . ?  
O114 Tb3 O112 141.5(10) . . ?  
O91 Tb3 O112 81.7(9) . . ?  
O111 Tb3 O112 148.9(10) . . ?  
O115 Tb3 O112 101.3(9) . . ?  
O88 Tb3 O112 75.8(10) . . ?  
O114 Tb3 O113 146.1(9) . . ?  
O91 Tb3 O113 80.3(9) . . ?  
O111 Tb3 O113 83.5(9) . . ?  
O115 Tb3 O113 71.7(8) . . ?  
O88 Tb3 O113 137.9(9) . . ?  
O112 Tb3 O113 69.2(9) . . ?  
O114 Tb3 O156 74.0(9) . . ?  
O91 Tb3 O156 140.6(9) . . ?  
O111 Tb3 O156 134.7(9) . . ?  
O115 Tb3 O156 68.1(9) . . ?  
O88 Tb3 O156 72.6(9) . . ?  
O112 Tb3 O156 73.5(9) . . ?  
O113 Tb3 O156 117.0(8) . . ?  
O114 Tb3 Cs3 109.4(6) . . ?  
O91 Tb3 Cs3 135.5(6) . . ?  
O111 Tb3 Cs3 130.8(6) . . ?  
O115 Tb3 Cs3 48.7(6) . . ?

O88 Tb3 Cs3 105.5(6) . . ?  
O112 Tb3 Cs3 55.8(7) . . ?  
O113 Tb3 Cs3 73.4(6) . . ?  
O156 Tb3 Cs3 43.6(6) . . ?  
O114 Tb3 Cs2 123.6(6) . . ?  
O91 Tb3 Cs2 51.3(7) . . ?  
O111 Tb3 Cs2 55.4(6) . . ?  
O115 Tb3 Cs2 97.1(6) . . ?  
O88 Tb3 Cs2 123.2(6) . . ?  
O112 Tb3 Cs2 93.6(7) . . ?  
O113 Tb3 Cs2 40.3(5) . . ?  
O156 Tb3 Cs2 157.2(6) . . ?  
Cs3 Tb3 Cs2 113.63(8) . . ?  
O117 Tb4 O124 74.3(9) . . ?  
O117 Tb4 O123 112.7(9) . . ?  
O124 Tb4 O123 70.2(9) . . ?  
O117 Tb4 O118 68.5(8) . . ?  
O124 Tb4 O118 117.6(9) . . ?  
O123 Tb4 O118 80.2(9) . . ?  
O117 Tb4 O120 81.8(9) . . ?  
O124 Tb4 O120 140.4(10) . . ?  
O123 Tb4 O120 149.3(9) . . ?  
O118 Tb4 O120 80.6(9) . . ?  
O117 Tb4 O122 143.9(9) . . ?  
O124 Tb4 O122 77.6(10) . . ?  
O123 Tb4 O122 77.6(9) . . ?  
O118 Tb4 O122 146.5(9) . . ?  
O120 Tb4 O122 107.1(9) . . ?  
O117 Tb4 O116 142.5(8) . . ?  
O124 Tb4 O116 137.6(10) . . ?  
O123 Tb4 O116 74.1(9) . . ?  
O118 Tb4 O116 76.9(9) . . ?  
O120 Tb4 O116 78.4(9) . . ?  
O122 Tb4 O116 73.0(9) . . ?  
O117 Tb4 O121 72.1(8) . . ?  
O124 Tb4 O121 74.2(9) . . ?  
O123 Tb4 O121 140.6(9) . . ?  
O118 Tb4 O121 132.6(9) . . ?  
O120 Tb4 O121 68.5(9) . . ?  
O122 Tb4 O121 78.8(9) . . ?  
O116 Tb4 O121 127.3(9) . . ?  
O193 Tb5 O194 149.1(10) . . ?  
O193 Tb5 O192 144.5(9) . . ?  
O194 Tb5 O192 64.3(8) . . ?  
O193 Tb5 O190 70.8(10) . . ?  
O194 Tb5 O190 140.1(9) . . ?  
O192 Tb5 O190 76.9(8) . . ?  
O193 Tb5 O161 110.7(10) . . ?  
O194 Tb5 O161 81.6(9) . . ?  
O192 Tb5 O161 77.9(9) . . ?  
O190 Tb5 O161 81.6(9) . . ?  
O193 Tb5 O159 75.7(10) . . ?  
O194 Tb5 O159 83.2(9) . . ?  
O192 Tb5 O159 136.5(9) . . ?  
O190 Tb5 O159 123.1(9) . . ?  
O161 Tb5 O159 69.0(10) . . ?  
O193 Tb5 O191 83.4(10) . . ?  
O194 Tb5 O191 98.8(9) . . ?  
O192 Tb5 O191 77.1(9) . . ?  
O190 Tb5 O191 80.5(9) . . ?  
O161 Tb5 O191 151.9(10) . . ?  
O159 Tb5 O191 139.0(10) . . ?  
O193 Tb5 O189 75.8(11) . . ?  
O194 Tb5 O189 76.7(10) . . ?

O192 Tb5 O189 121.5 (9) . . ?  
O190 Tb5 O189 135.7 (9) . . ?  
O161 Tb5 O189 138.4 (9) . . ?  
O159 Tb5 O189 73.4 (10) . . ?  
O191 Tb5 O189 67.4 (10) . . ?  
O193 Tb5 W41 174.0 (8) . . ?  
O194 Tb5 W41 30.1 (6) . . ?  
O192 Tb5 W41 34.4 (6) . . ?  
O190 Tb5 W41 110.3 (6) . . ?  
O161 Tb5 W41 75.3 (7) . . ?  
O159 Tb5 W41 107.7 (7) . . ?  
O191 Tb5 W41 91.0 (7) . . ?  
O189 Tb5 W41 100.3 (7) . . ?  
O193 Tb5 K4 115.0 (8) . . ?  
O194 Tb5 K4 36.8 (6) . . ?  
O192 Tb5 K4 100.2 (6) . . ?  
O190 Tb5 K4 162.6 (6) . . ?  
O161 Tb5 K4 81.1 (7) . . ?  
O159 Tb5 K4 48.4 (7) . . ?  
O191 Tb5 K4 115.8 (7) . . ?  
O189 Tb5 K4 60.4 (7) . . ?  
W41 Tb5 K4 65.84 (17) . . ?  
O193 Tb5 Cs3 125.5 (8) . . ?  
O194 Tb5 Cs3 84.5 (6) . . ?  
O192 Tb5 Cs3 35.0 (6) . . ?  
O190 Tb5 Cs3 57.1 (6) . . ?  
O161 Tb5 Cs3 50.4 (7) . . ?  
O159 Tb5 Cs3 119.3 (7) . . ?  
O191 Tb5 Cs3 101.5 (7) . . ?  
O189 Tb5 Cs3 156.1 (7) . . ?  
W41 Tb5 Cs3 57.54 (6) . . ?  
K4 Tb5 Cs3 111.11 (18) . . ?  
O201 Tb6 O204 73.3 (13) . . ?  
O201 Tb6 O169 136.4 (12) . . ?  
O204 Tb6 O169 150.1 (12) . . ?  
O201 Tb6 O195 75.0 (12) . . ?  
O204 Tb6 O195 110.1 (12) . . ?  
O169 Tb6 O195 81.0 (11) . . ?  
O201 Tb6 O229 126.1 (12) . . ?  
O204 Tb6 O229 77.5 (12) . . ?  
O169 Tb6 O229 79.3 (11) . . ?  
O195 Tb6 O229 74.0 (11) . . ?  
O201 Tb6 O230 81.3 (14) . . ?  
O204 Tb6 O230 87.7 (14) . . ?  
O169 Tb6 O230 99.0 (13) . . ?  
O195 Tb6 O230 144.2 (13) . . ?  
O229 Tb6 O230 141.5 (13) . . ?  
O201 Tb6 O231 144.1 (12) . . ?  
O204 Tb6 O231 82.5 (13) . . ?  
O169 Tb6 O231 72.3 (11) . . ?  
O195 Tb6 O231 139.6 (11) . . ?  
O229 Tb6 O231 71.7 (11) . . ?  
O230 Tb6 O231 71.3 (13) . . ?  
O201 Tb6 O232 71.1 (12) . . ?  
O204 Tb6 O232 141.2 (12) . . ?  
O169 Tb6 O232 67.7 (11) . . ?  
O195 Tb6 O232 75.1 (11) . . ?  
O229 Tb6 O232 137.5 (11) . . ?  
O230 Tb6 O232 72.1 (13) . . ?  
O231 Tb6 O232 119.3 (12) . . ?  
O201 Tb6 Na16 107.6 (10) . 2\_546 ?  
O204 Tb6 Na16 139.4 (10) . 2\_546 ?  
O169 Tb6 Na16 48.0 (8) . 2\_546 ?  
O195 Tb6 Na16 109.1 (9) . 2\_546 ?

O229 Tb6 Na16 123.7(9) . 2\_546 ?  
O230 Tb6 Na16 53.5(11) . 2\_546 ?  
O231 Tb6 Na16 74.4(9) . 2\_546 ?  
O232 Tb6 Na16 44.9(9) . 2\_546 ?  
O201 Tb6 Cs8 24.9(9) . . ?  
O204 Tb6 Cs8 48.5(10) . . ?  
O169 Tb6 Cs8 161.3(8) . . ?  
O195 Tb6 Cs8 88.5(9) . . ?  
O229 Tb6 Cs8 112.8(8) . . ?  
O230 Tb6 Cs8 80.5(11) . . ?  
O231 Tb6 Cs8 124.2(9) . . ?  
O232 Tb6 Cs8 94.6(9) . . ?  
Na16 Tb6 Cs8 123.3(4) 2\_546 . ?  
O261 Tb7 O237 143.8(13) . 2\_546 ?  
O261 Tb7 O262 68.1(13) . . ?  
O237 Tb7 O262 148.0(13) 2\_546 . ?  
O261 Tb7 O236 113.3(13) . . ?  
O237 Tb7 O236 81.2(13) 2\_546 . ?  
O262 Tb7 O236 85.0(12) . . ?  
O261 Tb7 O265 86.9(12) . . ?  
O237 Tb7 O265 97.6(12) 2\_546 . ?  
O262 Tb7 O265 79.1(11) . . ?  
O236 Tb7 O265 147.4(12) . . ?  
O261 Tb7 O239 71.4(14) . . ?  
O237 Tb7 O239 83.3(14) 2\_546 . ?  
O262 Tb7 O239 119.3(13) . . ?  
O236 Tb7 O239 71.8(14) . . ?  
O265 Tb7 O239 140.7(14) . . ?  
O261 Tb7 O263 137.5(13) . . ?  
O237 Tb7 O263 76.7(13) 2\_546 . ?  
O262 Tb7 O263 72.2(13) . . ?  
O236 Tb7 O263 76.8(13) . . ?  
O265 Tb7 O263 71.2(13) . . ?  
O239 Tb7 O263 144.9(15) . . ?  
O261 Tb7 O264 74.2(13) . . ?  
O237 Tb7 O264 74.2(14) 2\_546 . ?  
O262 Tb7 O264 131.1(13) . . ?  
O236 Tb7 O264 139.6(13) . . ?  
O265 Tb7 O264 68.8(12) . . ?  
O239 Tb7 O264 73.9(15) . . ?  
O263 Tb7 O264 125.9(14) . . ?  
O302 Tb8 O278 78.4(12) . . ?  
O302 Tb8 O272 72.8(13) . . ?  
O278 Tb8 O272 126.0(13) . . ?  
O302 Tb8 O275 111.3(11) . . ?  
O278 Tb8 O275 72.1(10) . . ?  
O272 Tb8 O275 77.3(12) . . ?  
O302 Tb8 O306 84.2(13) . . ?  
O278 Tb8 O306 146.0(12) . . ?  
O272 Tb8 O306 74.5(14) . . ?  
O275 Tb8 O306 141.8(11) . . ?  
O302 Tb8 O305 144.1(12) . . ?  
O278 Tb8 O305 78.7(12) . . ?  
O272 Tb8 O305 142.9(13) . . ?  
O275 Tb8 O305 87.2(11) . . ?  
O306 Tb8 O305 100.2(12) . . ?  
O302 Tb8 O303 75.7(12) . . ?  
O278 Tb8 O303 75.9(12) . . ?  
O272 Tb8 O303 135.4(13) . . ?  
O275 Tb8 O303 144.7(11) . . ?  
O306 Tb8 O303 71.6(12) . . ?  
O305 Tb8 O303 72.2(11) . . ?  
O302 Tb8 O304 144.6(12) . . ?  
O278 Tb8 O304 133.4(12) . . ?

O272 Tb8 O304 74.6(13) . . ?  
O275 Tb8 O304 73.7(11) . . ?  
O306 Tb8 O304 74.3(12) . . ?  
O305 Tb8 O304 68.8(12) . . ?  
O303 Tb8 O304 121.4(12) . . ?  
O302 Tb8 Cs3 131.3(9) . . ?  
O278 Tb8 Cs3 131.8(8) . . ?  
O272 Tb8 Cs3 101.1(11) . . ?  
O275 Tb8 Cs3 114.2(6) . . ?  
O306 Tb8 Cs3 48.9(8) . . ?  
O305 Tb8 Cs3 55.1(9) . . ?  
O303 Tb8 Cs3 77.3(8) . . ?  
O304 Tb8 Cs3 44.6(9) . . ?  
O1 W1 O13 99.6(15) . . ?  
O1 W1 O10 99.2(15) . . ?  
O13 W1 O10 90.1(12) . . ?  
O1 W1 O18 100.8(15) . . ?  
O13 W1 O18 89.1(13) . . ?  
O10 W1 O18 159.9(12) . . ?  
O1 W1 O12 103.3(14) . . ?  
O13 W1 O12 157.1(11) . . ?  
O10 W1 O12 85.3(12) . . ?  
O18 W1 O12 87.7(13) . . ?  
O1 W1 O27 172.1(13) . . ?  
O13 W1 O27 73.5(11) . . ?  
O10 W1 O27 84.6(10) . . ?  
O18 W1 O27 75.8(11) . . ?  
O12 W1 O27 83.8(10) . . ?  
O1 W1 Cs4 77.3(12) . 2\_655 ?  
O13 W1 Cs4 53.1(9) . 2\_655 ?  
O10 W1 Cs4 140.8(8) . 2\_655 ?  
O18 W1 Cs4 48.1(9) . 2\_655 ?  
O12 W1 Cs4 133.8(8) . 2\_655 ?  
O27 W1 Cs4 95.3(7) . 2\_655 ?  
O2 W2 O14 100.7(15) . . ?  
O2 W2 O15 102.3(15) . . ?  
O14 W2 O15 94.3(13) . . ?  
O2 W2 O10 100.3(14) . . ?  
O14 W2 O10 90.2(12) . . ?  
O15 W2 O10 155.6(13) . . ?  
O2 W2 O11 99.8(15) . . ?  
O14 W2 O11 158.9(12) . . ?  
O15 W2 O11 86.2(13) . . ?  
O10 W2 O11 81.1(12) . . ?  
O2 W2 O26 173.4(14) . . ?  
O14 W2 O26 74.6(11) . . ?  
O15 W2 O26 73.8(11) . . ?  
O10 W2 O26 84.4(10) . . ?  
O11 W2 O26 85.4(10) . . ?  
O2 W2 K9 88.4(12) . 1\_655 ?  
O14 W2 K9 138.1(9) . 1\_655 ?  
O15 W2 K9 43.9(10) . 1\_655 ?  
O10 W2 K9 128.6(9) . 1\_655 ?  
O11 W2 K9 47.5(8) . 1\_655 ?  
O26 W2 K9 92.2(6) . 1\_655 ?  
O2 W2 K3 73.6(12) . 1\_655 ?  
O14 W2 K3 71.1(9) . 1\_655 ?  
O15 W2 K3 41.6(10) . 1\_655 ?  
O10 W2 K3 158.4(9) . 1\_655 ?  
O11 W2 K3 120.1(8) . 1\_655 ?  
O26 W2 K3 100.3(7) . 1\_655 ?  
K9 W2 K3 72.6(3) 1\_655 1\_655 ?  
O3 W3 O16 101.2(15) . . ?  
O3 W3 O11 103.1(14) . . ?

O16 W3 O11 93.0(14) . . ?  
O3 W3 O12 100.7(13) . . ?  
O16 W3 O12 156.9(13) . . ?  
O11 W3 O12 89.0(12) . . ?  
O3 W3 O17 96.7(15) . . ?  
O16 W3 O17 87.6(14) . . ?  
O11 W3 O17 159.6(13) . . ?  
O12 W3 O17 82.8(12) . . ?  
O3 W3 O25 167.7(13) . . ?  
O16 W3 O25 73.4(12) . . ?  
O11 W3 O25 88.3(11) . . ?  
O12 W3 O25 83.7(10) . . ?  
O17 W3 O25 72.3(12) . . ?  
O3 W3 K9 89.1(11) . 1\_655 ?  
O16 W3 K9 49.6(11) . 1\_655 ?  
O11 W3 K9 49.1(9) . 1\_655 ?  
O12 W3 K9 138.0(9) . 1\_655 ?  
O17 W3 K9 137.0(9) . 1\_655 ?  
O25 W3 K9 95.3(7) . 1\_655 ?  
O4 W4 O31 103.0(16) . . ?  
O4 W4 O23 97.5(16) . . ?  
O31 W4 O23 92.5(15) . . ?  
O4 W4 O22 101.5(15) . . ?  
O31 W4 O22 96.5(15) . . ?  
O23 W4 O22 156.5(12) . . ?  
O4 W4 O16 95.8(15) . . ?  
O31 W4 O16 161.1(14) . . ?  
O23 W4 O16 83.7(13) . . ?  
O22 W4 O16 80.7(12) . . ?  
O4 W4 O25 161.6(14) . . ?  
O31 W4 O25 93.5(13) . . ?  
O23 W4 O25 73.5(11) . . ?  
O22 W4 O25 84.3(11) . . ?  
O16 W4 O25 67.7(11) . . ?  
O4 W4 K9 83.2(13) . 1\_655 ?  
O31 W4 K9 136.0(12) . 1\_655 ?  
O23 W4 K9 130.3(9) . 1\_655 ?  
O22 W4 K9 40.3(9) . 1\_655 ?  
O16 W4 K9 47.2(9) . 1\_655 ?  
O25 W4 K9 90.6(7) . 1\_655 ?  
O5 W5 O30 101.8(16) . . ?  
O5 W5 O22 99.5(15) . . ?  
O30 W5 O22 94.3(14) . . ?  
O5 W5 O21 101.6(14) . . ?  
O30 W5 O21 94.4(13) . . ?  
O22 W5 O21 155.0(12) . . ?  
O5 W5 O15 93.8(14) . . ?  
O30 W5 O15 164.2(14) . . ?  
O22 W5 O15 84.5(12) . . ?  
O21 W5 O15 80.9(12) . . ?  
O5 W5 O26 164.6(13) . . ?  
O30 W5 O26 92.6(12) . . ?  
O22 W5 O26 84.4(11) . . ?  
O21 W5 O26 71.8(10) . . ?  
O15 W5 O26 71.6(10) . . ?  
O5 W5 K9 77.3(12) . 1\_655 ?  
O30 W5 K9 136.9(11) . 1\_655 ?  
O22 W5 K9 45.0(9) . 1\_655 ?  
O21 W5 K9 128.3(8) . 1\_655 ?  
O15 W5 K9 48.3(9) . 1\_655 ?  
O26 W5 K9 95.7(6) . 1\_655 ?  
O5 W5 K3 61.8(12) . 1\_655 ?  
O30 W5 K3 143.3(12) . 1\_655 ?  
O22 W5 K3 119.8(9) . 1\_655 ?

O21 W5 K3 61.0(8) . 1\_655 ?  
O15 W5 K3 45.6(9) . 1\_655 ?  
O26 W5 K3 103.3(7) . 1\_655 ?  
K9 W5 K3 74.8(3) 1\_655 1\_655 ?  
O6 W6 O29 103.6(13) . . ?  
O6 W6 O21 97.0(13) . . ?  
O29 W6 O21 96.2(11) . . ?  
O6 W6 O20 102.9(13) . . ?  
O29 W6 O20 92.8(12) . . ?  
O21 W6 O20 155.5(12) . . ?  
O6 W6 O14 95.0(13) . . ?  
O29 W6 O14 161.4(12) . . ?  
O21 W6 O14 81.5(11) . . ?  
O20 W6 O14 82.7(11) . . ?  
O6 W6 O26 165.4(12) . . ?  
O29 W6 O26 88.8(11) . . ?  
O21 W6 O26 73.7(10) . . ?  
O20 W6 O26 83.8(11) . . ?  
O14 W6 O26 72.8(10) . . ?  
O6 W6 K5 47.9(10) . 1\_655 ?  
O29 W6 K5 151.5(9) . 1\_655 ?  
O21 W6 K5 89.3(8) . 1\_655 ?  
O20 W6 K5 93.5(9) . 1\_655 ?  
O14 W6 K5 47.0(8) . 1\_655 ?  
O26 W6 K5 119.4(7) . 1\_655 ?  
O7 W7 O28 106.2(12) . . ?  
O7 W7 O20 102.5(13) . . ?  
O28 W7 O20 90.0(12) . . ?  
O7 W7 O19 97.6(12) . . ?  
O28 W7 O19 95.7(11) . . ?  
O20 W7 O19 156.6(12) . . ?  
O7 W7 O13 95.1(12) . . ?  
O28 W7 O13 158.7(11) . . ?  
O20 W7 O13 84.5(12) . . ?  
O19 W7 O13 82.0(11) . . ?  
O7 W7 O27 164.3(12) . . ?  
O28 W7 O27 88.1(10) . . ?  
O20 W7 O27 83.6(11) . . ?  
O19 W7 O27 74.0(10) . . ?  
O13 W7 O27 70.9(10) . . ?  
O7 W7 Cs4 70.3(10) . 2\_655 ?  
O28 W7 Cs4 134.6(9) . 2\_655 ?  
O20 W7 Cs4 135.4(9) . 2\_655 ?  
O19 W7 Cs4 43.2(7) . 2\_655 ?  
O13 W7 Cs4 53.9(8) . 2\_655 ?  
O27 W7 Cs4 95.1(7) . 2\_655 ?  
O8 W8 O33 103.3(14) . . ?  
O8 W8 O19 102.4(13) . . ?  
O33 W8 O19 94.1(12) . . ?  
O8 W8 O18 95.7(14) . . ?  
O33 W8 O18 160.6(14) . . ?  
O19 W8 O18 85.5(12) . . ?  
O8 W8 O24 103.6(13) . . ?  
O33 W8 O24 87.5(12) . . ?  
O19 W8 O24 152.8(11) . . ?  
O18 W8 O24 84.3(12) . . ?  
O8 W8 O27 166.2(12) . . ?  
O33 W8 O27 89.9(11) . . ?  
O19 W8 O27 72.1(10) . . ?  
O18 W8 O27 71.5(11) . . ?  
O24 W8 O27 80.8(10) . . ?  
O8 W8 Cs4 67.6(10) . 2\_655 ?  
O33 W8 Cs4 135.8(9) . 2\_655 ?  
O19 W8 Cs4 50.4(8) . 2\_655 ?

O18 W8 Cs4 56.0(9) . 2\_655 ?  
O24 W8 Cs4 136.5(8) . 2\_655 ?  
O27 W8 Cs4 100.2(6) . 2\_655 ?  
O9 W9 O17 99.1(15) . . ?  
O9 W9 O24 100.3(14) . . ?  
O17 W9 O24 89.4(13) . . ?  
O9 W9 O32 104.7(13) . . ?  
O17 W9 O32 156.1(14) . . ?  
O24 W9 O32 88.6(11) . . ?  
O9 W9 O23 98.4(14) . . ?  
O17 W9 O23 89.4(14) . . ?  
O24 W9 O23 161.2(13) . . ?  
O32 W9 O23 85.0(12) . . ?  
O9 W9 O25 168.8(13) . . ?  
O17 W9 O25 74.5(13) . . ?  
O24 W9 O25 89.0(11) . . ?  
O32 W9 O25 81.7(10) . . ?  
O23 W9 O25 72.7(11) . . ?  
O34 W10 O35 98.5(12) . . ?  
O34 W10 O32 102.4(11) . . ?  
O35 W10 O32 93.2(11) . . ?  
O34 W10 O40 93.5(11) . . ?  
O35 W10 O40 99.4(11) . . ?  
O32 W10 O40 158.0(11) . . ?  
O34 W10 O33 89.5(11) . . ?  
O35 W10 O33 171.6(13) . . ?  
O32 W10 O33 82.8(11) . . ?  
O40 W10 O33 82.2(11) . . ?  
O34 W10 O39 171.8(10) . . ?  
O35 W10 O39 86.3(12) . . ?  
O32 W10 O39 83.9(11) . . ?  
O40 W10 O39 79.1(10) . . ?  
O33 W10 O39 85.9(11) . . ?  
O50 W11 O39 101.2(14) . . ?  
O50 W11 O42 102.8(14) . . ?  
O39 W11 O42 94.6(12) . . ?  
O50 W11 O41 102.9(13) . . ?  
O39 W11 O41 91.0(12) . . ?  
O42 W11 O41 152.1(11) . . ?  
O50 W11 O61 96.1(14) . . ?  
O39 W11 O61 162.2(12) . . ?  
O42 W11 O61 85.5(12) . . ?  
O41 W11 O61 81.1(11) . . ?  
O50 W11 O48 164.4(13) . . ?  
O39 W11 O48 93.0(10) . . ?  
O42 W11 O48 69.4(10) . . ?  
O41 W11 O48 83.0(9) . . ?  
O61 W11 O48 70.3(10) . . ?  
O59 W12 O40 106.0(13) . . ?  
O59 W12 O41 100.3(13) . . ?  
O40 W12 O41 89.0(11) . . ?  
O59 W12 O60 102.2(13) . . ?  
O40 W12 O60 151.7(11) . . ?  
O41 W12 O60 88.1(12) . . ?  
O59 W12 O46 97.2(13) . . ?  
O40 W12 O46 86.4(11) . . ?  
O41 W12 O46 162.6(10) . . ?  
O60 W12 O46 88.1(12) . . ?  
O59 W12 O47 169.7(12) . . ?  
O40 W12 O47 79.9(9) . . ?  
O41 W12 O47 88.1(10) . . ?  
O60 W12 O47 71.9(10) . . ?  
O46 W12 O47 74.6(10) . . ?  
O58 W13 O65 101.5(12) . . ?



O58 W13 O57 104.5 (12) . . ?  
O65 W13 O57 154.0 (11) . . ?  
O58 W13 O45 99.7 (11) . . ?  
O65 W13 O45 88.7 (10) . . ?  
O57 W13 O45 85.2 (10) . . ?  
O58 W13 O46 100.8 (11) . . ?  
O65 W13 O46 89.1 (11) . . ?  
O57 W13 O46 87.9 (10) . . ?  
O45 W13 O46 159.4 (10) . . ?  
O58 W13 O47 170.1 (10) . . ?  
O65 W13 O47 72.1 (10) . . ?  
O57 W13 O47 82.4 (9) . . ?  
O45 W13 O47 87.9 (9) . . ?  
O46 W13 O47 72.0 (9) . . ?  
O58 W13 Cs1 45.9 (8) . . ?  
O65 W13 Cs1 97.5 (8) . . ?  
O57 W13 Cs1 99.2 (7) . . ?  
O45 W13 Cs1 53.8 (7) . . ?  
O46 W13 Cs1 146.7 (8) . . ?  
O47 W13 Cs1 141.1 (6) . . ?  
O56 W14 O55 102.8 (13) . . ?  
O56 W14 O44 103.7 (13) . . ?  
O55 W14 O44 93.5 (12) . . ?  
O56 W14 O45 99.4 (12) . . ?  
O55 W14 O45 89.8 (10) . . ?  
O44 W14 O45 155.2 (11) . . ?  
O56 W14 O64 91.4 (14) . . ?  
O55 W14 O64 165.2 (11) . . ?  
O44 W14 O64 86.9 (12) . . ?  
O45 W14 O64 83.8 (11) . . ?  
O56 W14 O49 164.7 (12) . . ?  
O55 W14 O49 92.1 (10) . . ?  
O44 W14 O49 71.7 (10) . . ?  
O45 W14 O49 83.7 (9) . . ?  
O64 W14 O49 73.9 (10) . . ?  
O56 W14 Cs1 48.1 (10) . . ?  
O55 W14 Cs1 90.7 (8) . . ?  
O44 W14 Cs1 151.7 (9) . . ?  
O45 W14 Cs1 52.6 (7) . . ?  
O64 W14 Cs1 96.0 (8) . . ?  
O49 W14 Cs1 136.2 (6) . . ?  
O56 W14 K4 88.4 (10) . . ?  
O55 W14 K4 46.3 (8) . . ?  
O44 W14 K4 54.3 (9) . . ?  
O45 W14 K4 135.8 (8) . . ?  
O64 W14 K4 139.7 (8) . . ?  
O49 W14 K4 99.8 (6) . . ?  
Cs1 W14 K4 113.15 (19) . . ?  
O54 W15 O53 103.1 (14) . . ?  
O54 W15 O43 99.8 (13) . . ?  
O53 W15 O43 93.8 (13) . . ?  
O54 W15 O44 100.7 (13) . . ?  
O53 W15 O44 93.9 (13) . . ?  
O43 W15 O44 155.8 (12) . . ?  
O54 W15 O63 95.4 (13) . . ?  
O53 W15 O63 161.5 (12) . . ?  
O43 W15 O63 83.0 (12) . . ?  
O44 W15 O63 82.4 (12) . . ?  
O54 W15 O49 166.2 (12) . . ?  
O53 W15 O49 89.8 (11) . . ?  
O43 W15 O49 83.7 (10) . . ?  
O44 W15 O49 73.4 (10) . . ?  
O63 W15 O49 71.7 (10) . . ?  
O51 W16 O52 102.6 (16) . . ?

O51 W16 O42 96.3 (15) . . ?  
O52 W16 O42 94.7 (13) . . ?  
O51 W16 O43 102.8 (15) . . ?  
O52 W16 O43 92.1 (12) . . ?  
O42 W16 O43 157.8 (12) . . ?  
O51 W16 O62 95.6 (15) . . ?  
O52 W16 O62 161.7 (12) . . ?  
O42 W16 O62 81.4 (12) . . ?  
O43 W16 O62 85.6 (11) . . ?  
O51 W16 O48 165.7 (14) . . ?  
O52 W16 O48 88.9 (11) . . ?  
O42 W16 O48 74.1 (11) . . ?  
O43 W16 O48 85.0 (10) . . ?  
O62 W16 O48 72.8 (10) . . ?  
O71 W17 O62 100.5 (14) . . ?  
O71 W17 O61 101.1 (13) . . ?  
O62 W17 O61 92.5 (12) . . ?  
O71 W17 O67 102.3 (13) . . ?  
O62 W17 O67 92.5 (12) . . ?  
O61 W17 O67 154.8 (12) . . ?  
O71 W17 O68 100.3 (13) . . ?  
O62 W17 O68 159.1 (12) . . ?  
O61 W17 O68 85.0 (11) . . ?  
O67 W17 O68 81.6 (11) . . ?  
O71 W17 O48 171.7 (12) . . ?  
O62 W17 O48 73.7 (11) . . ?  
O61 W17 O48 73.6 (10) . . ?  
O67 W17 O48 84.2 (10) . . ?  
O68 W17 O48 85.8 (9) . . ?  
O71 W17 K8 53.6 (11) . . ?  
O62 W17 K8 47.0 (9) . . ?  
O61 W17 K8 98.3 (9) . . ?  
O67 W17 K8 103.1 (9) . . ?  
O68 W17 K8 153.9 (7) . . ?  
O48 W17 K8 120.1 (6) . . ?  
O70 W18 O66 102.3 (13) . . ?  
O70 W18 O68 101.1 (12) . . ?  
O66 W18 O68 91.6 (12) . . ?  
O70 W18 O60 97.1 (12) . . ?  
O66 W18 O60 160.0 (12) . . ?  
O68 W18 O60 89.3 (11) . . ?  
O70 W18 O65 98.4 (12) . . ?  
O66 W18 O65 89.4 (12) . . ?  
O68 W18 O65 159.9 (11) . . ?  
O60 W18 O65 83.1 (11) . . ?  
O70 W18 O47 166.3 (11) . . ?  
O66 W18 O47 88.7 (11) . . ?  
O68 W18 O47 86.7 (10) . . ?  
O60 W18 O47 71.5 (10) . . ?  
O65 W18 O47 73.2 (10) . . ?  
O70 W18 Cs1 52.4 (9) . 2 ?  
O66 W18 Cs1 50.4 (9) . 2 ?  
O68 W18 Cs1 105.8 (8) . 2 ?  
O60 W18 Cs1 147.5 (8) . 2 ?  
O65 W18 Cs1 90.2 (8) . 2 ?  
O47 W18 Cs1 136.5 (6) . 2 ?  
O69 W19 O67 100.8 (14) . . ?  
O69 W19 O63 102.8 (14) . . ?  
O67 W19 O63 92.1 (12) . . ?  
O69 W19 O64 100.0 (14) . . ?  
O67 W19 O64 157.3 (13) . . ?  
O63 W19 O64 92.3 (13) . . ?  
O69 W19 O66 98.8 (13) . . ?  
O67 W19 O66 80.9 (12) . . ?

O63 W19 O66 158.3(12) . . ?  
O64 W19 O66 86.9(12) . . ?  
O69 W19 O49 174.0(12) . . ?  
O67 W19 O49 84.1(11) . . ?  
O63 W19 O49 73.4(11) . . ?  
O64 W19 O49 75.8(11) . . ?  
O66 W19 O49 85.4(10) . . ?  
O69 W19 Cs1 50.9(10) . 2 ?  
O67 W19 Cs1 100.9(9) . 2 ?  
O63 W19 Cs1 152.2(9) . 2 ?  
O64 W19 Cs1 85.2(9) . 2 ?  
O66 W19 Cs1 49.3(8) . 2 ?  
O49 W19 Cs1 131.9(6) . 2 ?  
O72 W20 O73 101.7(11) . . ?  
O72 W20 O57 94.2(11) . . ?  
O73 W20 O57 104.8(11) . . ?  
O72 W20 O109 101.5(11) . . ?  
O73 W20 O109 91.7(10) . . ?  
O57 W20 O109 154.5(10) . . ?  
O72 W20 O110 93.1(10) . . ?  
O73 W20 O110 159.8(9) . . ?  
O57 W20 O110 87.7(9) . . ?  
O109 W20 O110 71.7(9) . . ?  
O72 W20 O55 170.9(10) . . ?  
O73 W20 O55 85.2(10) . . ?  
O57 W20 O55 78.3(10) . . ?  
O109 W20 O55 83.9(9) . . ?  
O110 W20 O55 81.7(9) . . ?  
O72 W20 K4 138.5(8) . . ?  
O73 W20 K4 62.8(8) . . ?  
O57 W20 K4 126.3(7) . . ?  
O109 W20 K4 45.6(7) . . ?  
O110 W20 K4 96.9(6) . . ?  
O55 W20 K4 50.0(7) . . ?  
O72 W20 Cs2 63.7(8) . . ?  
O73 W20 Cs2 74.4(8) . . ?  
O57 W20 Cs2 156.5(7) . . ?  
O109 W20 Cs2 46.8(7) . . ?  
O110 W20 Cs2 100.6(6) . . ?  
O55 W20 Cs2 124.5(6) . . ?  
K4 W20 Cs2 74.90(17) . . ?  
O120 W21 O111 100.8(12) . . ?  
O120 W21 O109 99.8(11) . . ?  
O111 W21 O109 98.1(11) . . ?  
O120 W21 O80 98.2(12) . . ?  
O111 W21 O80 103.2(12) . . ?  
O109 W21 O80 148.8(10) . . ?  
O120 W21 O157 174.6(10) . . ?  
O111 W21 O157 83.7(10) . . ?  
O109 W21 O157 82.3(10) . . ?  
O80 W21 O157 77.8(10) . . ?  
O120 W21 O110 94.6(10) . . ?  
O111 W21 O110 162.9(10) . . ?  
O109 W21 O110 71.7(9) . . ?  
O80 W21 O110 81.7(10) . . ?  
O157 W21 O110 81.3(9) . . ?  
O120 W21 K4 61.6(9) . . ?  
O111 W21 K4 87.1(9) . . ?  
O109 W21 K4 42.7(7) . . ?  
O80 W21 K4 159.0(8) . . ?  
O157 W21 K4 122.0(7) . . ?  
O110 W21 K4 93.7(6) . . ?  
O120 W21 Cs2 134.2(9) . . ?  
O111 W21 Cs2 64.4(8) . . ?

O109 W21 Cs2 46.1(7) . . ?  
O80 W21 Cs2 126.8(8) . . ?  
O157 W21 Cs2 50.4(6) . . ?  
O110 W21 Cs2 99.4(6) . . ?  
K4 W21 Cs2 74.11(16) . . ?  
O79 W22 O78 100.7(13) . . ?  
O79 W22 O95 103.1(13) . . ?  
O78 W22 O95 91.4(12) . . ?  
O79 W22 O80 101.3(13) . . ?  
O78 W22 O80 84.1(11) . . ?  
O95 W22 O80 155.7(12) . . ?  
O79 W22 O81 98.8(13) . . ?  
O78 W22 O81 159.8(11) . . ?  
O95 W22 O81 89.1(11) . . ?  
O80 W22 O81 87.2(10) . . ?  
O79 W22 O101 171.6(12) . . ?  
O78 W22 O101 86.5(10) . . ?  
O95 W22 O101 72.2(10) . . ?  
O80 W22 O101 83.7(10) . . ?  
O81 W22 O101 74.5(10) . . ?  
O79 W22 Cs4 83.3(10) . . ?  
O78 W22 Cs4 48.4(8) . . ?  
O95 W22 Cs4 52.1(8) . . ?  
O80 W22 Cs4 131.8(8) . . ?  
O81 W22 Cs4 140.0(7) . . ?  
O101 W22 Cs4 98.5(6) . . ?  
O79 W22 Cs1 34.1(10) . . ?  
O78 W22 Cs1 121.0(8) . . ?  
O95 W22 Cs1 124.9(9) . . ?  
O80 W22 Cs1 76.9(8) . . ?  
O81 W22 Cs1 74.2(8) . . ?  
O101 W22 Cs1 143.7(6) . . ?  
Cs4 W22 Cs1 117.34(13) . . ?  
O77 W23 O157 102.7(12) . . ?  
O77 W23 O78 106.3(12) . . ?  
O157 W23 O78 84.8(11) . . ?  
O77 W23 O93 98.2(12) . . ?  
O157 W23 O93 96.9(11) . . ?  
O78 W23 O93 154.5(11) . . ?  
O77 W23 O94 91.5(11) . . ?  
O157 W23 O94 165.2(11) . . ?  
O78 W23 O94 87.1(10) . . ?  
O93 W23 O94 85.1(10) . . ?  
O77 W23 O102 162.1(11) . . ?  
O157 W23 O102 93.7(10) . . ?  
O78 W23 O102 82.1(10) . . ?  
O93 W23 O102 72.4(10) . . ?  
O94 W23 O102 72.9(9) . . ?  
O77 W23 Cs2 81.8(9) . . ?  
O157 W23 Cs2 48.1(8) . . ?  
O78 W23 Cs2 132.4(8) . . ?  
O93 W23 Cs2 57.6(8) . . ?  
O94 W23 Cs2 140.3(7) . . ?  
O102 W23 Cs2 104.4(6) . . ?  
O77 W23 Cs4 74.7(9) . . ?  
O157 W23 Cs4 131.9(8) . . ?  
O78 W23 Cs4 52.3(8) . . ?  
O93 W23 Cs4 131.1(8) . . ?  
O94 W23 Cs4 47.8(7) . . ?  
O102 W23 Cs4 99.8(6) . . ?  
Cs2 W23 Cs4 155.78(12) . . ?  
O92 W24 O91 103.9(13) . . ?  
O92 W24 O90 103.2(12) . . ?  
O91 W24 O90 94.5(11) . . ?

O92 W24 O93 96.2(12) . . ?  
O91 W24 O93 94.0(11) . . ?  
O90 W24 O93 156.2(10) . . ?  
O92 W24 O99 95.7(12) . . ?  
O91 W24 O99 160.2(11) . . ?  
O90 W24 O99 83.8(10) . . ?  
O93 W24 O99 80.7(11) . . ?  
O92 W24 O102 163.8(11) . . ?  
O91 W24 O102 89.2(10) . . ?  
O90 W24 O102 84.9(10) . . ?  
O93 W24 O102 73.0(10) . . ?  
O99 W24 O102 71.0(10) . . ?  
O92 W24 Cs2 84.3(10) . . ?  
O91 W24 Cs2 50.9(9) . . ?  
O90 W24 Cs2 145.1(7) . . ?  
O93 W24 Cs2 49.7(7) . . ?  
O99 W24 Cs2 129.9(8) . . ?  
O102 W24 Cs2 97.1(7) . . ?  
O88 W25 O89 103.9(12) . . ?  
O88 W25 O90 91.3(11) . . ?  
O89 W25 O90 101.9(11) . . ?  
O88 W25 O87 97.4(12) . . ?  
O89 W25 O87 95.7(12) . . ?  
O90 W25 O87 157.9(10) . . ?  
O88 W25 O98 162.1(11) . . ?  
O89 W25 O98 93.9(11) . . ?  
O90 W25 O98 83.0(10) . . ?  
O87 W25 O98 82.5(10) . . ?  
O88 W25 O389 89.3(11) . . ?  
O89 W25 O389 165.1(11) . . ?  
O90 W25 O389 84.3(10) . . ?  
O87 W25 O389 75.6(10) . . ?  
O98 W25 O389 73.3(10) . . ?  
O86 W26 O85 103.1(12) . . ?  
O86 W26 O84 101.8(13) . . ?  
O85 W26 O84 88.5(12) . . ?  
O86 W26 O87 102.3(12) . . ?  
O85 W26 O87 94.6(11) . . ?  
O84 W26 O87 154.4(12) . . ?  
O86 W26 O97 94.0(12) . . ?  
O85 W26 O97 162.2(10) . . ?  
O84 W26 O97 83.4(11) . . ?  
O87 W26 O97 86.2(10) . . ?  
O86 W26 O389 163.8(12) . . ?  
O85 W26 O389 91.7(10) . . ?  
O84 W26 O389 84.9(10) . . ?  
O87 W26 O389 69.6(10) . . ?  
O97 W26 O389 72.0(9) . . ?  
O86 W26 K2 31.8(10) . 1\_545 ?  
O85 W26 K2 95.6(8) . 1\_545 ?  
O84 W26 K2 70.7(9) . 1\_545 ?  
O87 W26 K2 134.0(8) . 1\_545 ?  
O97 W26 K2 96.6(7) . 1\_545 ?  
O389 W26 K2 154.3(6) . 1\_545 ?  
O83 W27 O84 101.0(14) . . ?  
O83 W27 O96 100.5(13) . . ?  
O84 W27 O96 89.1(12) . . ?  
O83 W27 O82 105.6(13) . . ?  
O84 W27 O82 87.1(12) . . ?  
O96 W27 O82 153.8(11) . . ?  
O83 W27 O81 96.9(13) . . ?  
O84 W27 O81 162.0(12) . . ?  
O96 W27 O81 89.3(11) . . ?  
O82 W27 O81 86.5(11) . . ?

O83 W27 O101 168.2(12) . . ?  
O84 W27 O101 88.4(11) . . ?  
O96 W27 O101 72.2(10) . . ?  
O82 W27 O101 81.8(10) . . ?  
O81 W27 O101 74.1(9) . . ?  
O107 W28 O104 100.3(12) . . ?  
O107 W28 O103 101.0(12) . . ?  
O104 W28 O103 90.3(11) . . ?  
O107 W28 O96 99.1(11) . . ?  
O104 W28 O96 159.8(11) . . ?  
O103 W28 O96 91.6(11) . . ?  
O107 W28 O95 100.1(12) . . ?  
O104 W28 O95 90.0(12) . . ?  
O103 W28 O95 158.4(11) . . ?  
O96 W28 O95 80.9(11) . . ?  
O107 W28 O101 168.7(11) . . ?  
O104 W28 O101 87.5(10) . . ?  
O103 W28 O101 86.9(10) . . ?  
O96 W28 O101 72.5(10) . . ?  
O95 W28 O101 71.6(10) . . ?  
O107 W28 K7 48.3(9) . . ?  
O104 W28 K7 102.0(9) . . ?  
O103 W28 K7 52.9(8) . . ?  
O96 W28 K7 95.2(8) . . ?  
O95 W28 K7 147.4(8) . . ?  
O101 W28 K7 138.2(6) . . ?  
O107 W28 Cs4 81.6(9) . . ?  
O104 W28 Cs4 47.1(8) . . ?  
O103 W28 Cs4 136.4(8) . . ?  
O96 W28 Cs4 131.4(8) . . ?  
O95 W28 Cs4 51.6(8) . . ?  
O101 W28 Cs4 98.3(6) . . ?  
K7 W28 Cs4 118.2(2) . . ?  
O108 W29 O99 104.7(13) . . ?  
O108 W29 O94 100.4(13) . . ?  
O99 W29 O94 91.2(11) . . ?  
O108 W29 O105 99.0(13) . . ?  
O99 W29 O105 91.6(11) . . ?  
O94 W29 O105 158.9(10) . . ?  
O108 W29 O104 98.4(12) . . ?  
O99 W29 O104 156.9(11) . . ?  
O94 W29 O104 85.9(11) . . ?  
O105 W29 O104 83.4(11) . . ?  
O108 W29 O102 173.5(12) . . ?  
O99 W29 O102 72.3(10) . . ?  
O94 W29 O102 74.1(9) . . ?  
O105 W29 O102 86.9(10) . . ?  
O104 W29 O102 84.9(10) . . ?  
O108 W29 Cs4 81.4(10) . . ?  
O99 W29 Cs4 134.5(8) . . ?  
O94 W29 Cs4 44.0(7) . . ?  
O105 W29 Cs4 132.7(8) . . ?  
O104 W29 Cs4 50.3(8) . . ?  
O102 W29 Cs4 96.6(6) . . ?  
O106 W30 O98 103.1(12) . . ?  
O106 W30 O97 99.1(12) . . ?  
O98 W30 O97 94.5(11) . . ?  
O106 W30 O105 100.7(12) . . ?  
O98 W30 O105 90.6(11) . . ?  
O97 W30 O105 157.9(11) . . ?  
O106 W30 O103 99.1(11) . . ?  
O98 W30 O103 157.6(11) . . ?  
O97 W30 O103 84.8(10) . . ?  
O105 W30 O103 82.3(11) . . ?

O106 W30 O389 172.5(10) . . ?  
O98 W30 O389 72.7(10) . . ?  
O97 W30 O389 75.4(10) . . ?  
O105 W30 O389 85.7(10) . . ?  
O103 W30 O389 85.6(9) . . ?  
O106 W30 K7 49.8(9) . 2\_645 ?  
O98 W30 K7 131.6(8) . 2\_645 ?  
O97 W30 K7 125.3(8) . 2\_645 ?  
O105 W30 K7 63.3(8) . 2\_645 ?  
O103 W30 K7 63.3(8) . 2\_645 ?  
O389 W30 K7 137.5(6) . 2\_645 ?  
O114 W31 O117 98.6(11) . . ?  
O114 W31 O82 99.1(11) . . ?  
O117 W31 O82 94.5(11) . . ?  
O114 W31 O126 97.2(11) . . ?  
O117 W31 O126 100.4(11) . . ?  
O82 W31 O126 156.0(12) . . ?  
O114 W31 O125 173.9(11) . . ?  
O117 W31 O125 87.0(10) . . ?  
O82 W31 O125 82.5(10) . . ?  
O126 W31 O125 79.6(10) . . ?  
O114 W31 O85 86.5(11) . . ?  
O117 W31 O85 172.5(9) . . ?  
O82 W31 O85 79.2(10) . . ?  
O126 W31 O85 84.3(11) . . ?  
O125 W31 O85 88.0(10) . . ?  
O135 W32 O125 102.5(13) . . ?  
O135 W32 O136 100.9(13) . . ?  
O125 W32 O136 96.7(11) . . ?  
O135 W32 O119 104.3(14) . . ?  
O125 W32 O119 87.4(11) . . ?  
O136 W32 O119 153.0(12) . . ?  
O135 W32 O144 93.4(15) . . ?  
O125 W32 O144 163.1(13) . . ?  
O136 W32 O144 85.9(13) . . ?  
O119 W32 O144 83.0(13) . . ?  
O135 W32 O143 163.3(12) . . ?  
O125 W32 O143 93.5(10) . . ?  
O136 W32 O143 72.2(10) . . ?  
O119 W32 O143 80.9(11) . . ?  
O144 W32 O143 71.3(12) . . ?  
O133 W33 O119 100.6(13) . . ?  
O133 W33 O149 101.0(13) . . ?  
O119 W33 O149 90.3(12) . . ?  
O133 W33 O126 105.5(13) . . ?  
O119 W33 O126 87.2(12) . . ?  
O149 W33 O126 153.5(12) . . ?  
O133 W33 O132 97.6(13) . . ?  
O119 W33 O132 161.7(12) . . ?  
O149 W33 O132 88.1(11) . . ?  
O126 W33 O132 86.2(11) . . ?  
O133 W33 O142 170.4(12) . . ?  
O119 W33 O142 87.8(11) . . ?  
O149 W33 O142 74.1(11) . . ?  
O126 W33 O142 79.4(11) . . ?  
O132 W33 O142 74.2(11) . . ?  
O131 W34 O130 101.1(13) . . ?  
O131 W34 O148 101.1(13) . . ?  
O130 W34 O148 88.4(12) . . ?  
O131 W34 O132 100.1(13) . . ?  
O130 W34 O132 158.7(12) . . ?  
O148 W34 O132 87.5(12) . . ?  
O131 W34 O127 99.9(13) . . ?  
O130 W34 O127 86.7(12) . . ?

O148 W34 O127 159.1(11) . . ?  
O132 W34 O127 89.7(11) . . ?  
O131 W34 O142 171.3(13) . . ?  
O130 W34 O142 85.4(11) . . ?  
O148 W34 O142 73.1(10) . . ?  
O132 W34 O142 73.5(11) . . ?  
O127 W34 O142 86.2(10) . . ?  
O131 W34 Cs3 39.0(10) . . ?  
O130 W34 Cs3 110.0(9) . . ?  
O148 W34 Cs3 137.3(8) . . ?  
O132 W34 Cs3 86.9(8) . . ?  
O127 W34 Cs3 63.2(8) . . ?  
O142 W34 Cs3 143.8(6) . . ?  
O129 W35 O128 103.2(11) . . ?  
O129 W35 O140 100.3(12) . . ?  
O128 W35 O140 91.7(11) . . ?  
O129 W35 O130 104.0(12) . . ?  
O128 W35 O130 89.9(11) . . ?  
O140 W35 O130 154.6(11) . . ?  
O129 W35 O147 94.9(12) . . ?  
O128 W35 O147 161.9(11) . . ?  
O140 W35 O147 84.8(11) . . ?  
O130 W35 O147 85.8(11) . . ?  
O129 W35 O141 164.5(11) . . ?  
O128 W35 O141 90.2(9) . . ?  
O140 W35 O141 71.2(10) . . ?  
O130 W35 O141 83.4(10) . . ?  
O147 W35 O141 71.8(10) . . ?  
O129 W35 Cs5 46.8(9) . . ?  
O128 W35 Cs5 113.6(8) . . ?  
O140 W35 Cs5 55.4(8) . . ?  
O130 W35 Cs5 144.6(8) . . ?  
O147 W35 Cs5 78.9(8) . . ?  
O141 W35 Cs5 120.6(7) . . ?  
O139 W36 O123 106.0(13) . . ?  
O139 W36 O140 97.0(13) . . ?  
O123 W36 O140 96.7(11) . . ?  
O139 W36 O138 101.2(12) . . ?  
O123 W36 O138 92.5(11) . . ?  
O140 W36 O138 156.5(11) . . ?  
O139 W36 O146 93.9(13) . . ?  
O123 W36 O146 160.0(13) . . ?  
O140 W36 O146 82.9(11) . . ?  
O138 W36 O146 81.1(11) . . ?  
O139 W36 O141 163.8(11) . . ?  
O123 W36 O141 88.5(11) . . ?  
O140 W36 O141 73.7(10) . . ?  
O138 W36 O141 85.1(10) . . ?  
O146 W36 O141 72.1(11) . . ?  
O139 W36 K3 48.4(10) . . ?  
O123 W36 K3 93.2(9) . . ?  
O140 W36 K3 51.6(8) . . ?  
O138 W36 K3 149.3(8) . . ?  
O146 W36 K3 101.9(9) . . ?  
O141 W36 K3 125.1(7) . . ?  
O139 W36 K5 33.7(9) . . ?  
O123 W36 K5 75.5(9) . . ?  
O140 W36 K5 114.6(8) . . ?  
O138 W36 K5 88.6(8) . . ?  
O146 W36 K5 122.9(9) . . ?  
O141 W36 K5 162.5(7) . . ?  
K3 W36 K5 63.9(3) . . ?  
O137 W37 O124 103.0(13) . . ?  
O137 W37 O138 99.0(13) . . ?



O124 W37 O138 92.5 (12) . . ?  
O137 W37 O136 97.3 (13) . . ?  
O124 W37 O136 96.6 (12) . . ?  
O138 W37 O136 159.1 (11) . . ?  
O137 W37 O145 95.0 (13) . . ?  
O124 W37 O145 161.9 (12) . . ?  
O138 W37 O145 83.1 (12) . . ?  
O136 W37 O145 82.5 (11) . . ?  
O137 W37 O143 166.5 (12) . . ?  
O124 W37 O143 88.8 (11) . . ?  
O138 W37 O143 86.8 (11) . . ?  
O136 W37 O143 74.7 (10) . . ?  
O145 W37 O143 73.4 (11) . . ?  
O155 W38 O145 101.7 (17) . . ?  
O155 W38 O144 101.2 (17) . . ?  
O145 W38 O144 91.4 (14) . . ?  
O155 W38 O151 99.8 (16) . . ?  
O145 W38 O151 89.4 (13) . . ?  
O144 W38 O151 158.4 (13) . . ?  
O155 W38 O150 99.1 (16) . . ?  
O145 W38 O150 158.9 (12) . . ?  
O144 W38 O150 87.6 (13) . . ?  
O151 W38 O150 83.9 (12) . . ?  
O155 W38 O143 173.6 (15) . . ?  
O145 W38 O143 74.4 (11) . . ?  
O144 W38 O143 74.0 (12) . . ?  
O151 W38 O143 85.5 (10) . . ?  
O150 W38 O143 85.1 (10) . . ?  
O155 W38 K8 80.4 (14) . 1\_545 ?  
O145 W38 K8 137.2 (10) . 1\_545 ?  
O144 W38 K8 47.2 (11) . 1\_545 ?  
O151 W38 K8 132.8 (9) . 1\_545 ?  
O150 W38 K8 50.1 (9) . 1\_545 ?  
O143 W38 K8 98.9 (7) . 1\_545 ?  
O154 W39 O146 99.7 (15) . . ?  
O154 W39 O147 100.9 (14) . . ?  
O146 W39 O147 95.3 (13) . . ?  
O154 W39 O151 99.2 (15) . . ?  
O146 W39 O151 88.7 (13) . . ?  
O147 W39 O151 158.6 (12) . . ?  
O154 W39 O152 101.8 (15) . . ?  
O146 W39 O152 158.3 (12) . . ?  
O147 W39 O152 83.7 (12) . . ?  
O151 W39 O152 84.8 (12) . . ?  
O154 W39 O141 172.0 (14) . . ?  
O146 W39 O141 74.3 (11) . . ?  
O147 W39 O141 74.9 (10) . . ?  
O151 W39 O141 86.0 (10) . . ?  
O152 W39 O141 84.5 (10) . . ?  
O153 W40 O152 102.2 (16) . . ?  
O153 W40 O150 103.3 (16) . . ?  
O152 W40 O150 91.7 (13) . . ?  
O153 W40 O149 96.7 (16) . . ?  
O152 W40 O149 160.4 (12) . . ?  
O150 W40 O149 88.9 (12) . . ?  
O153 W40 O148 97.2 (15) . . ?  
O152 W40 O148 90.9 (12) . . ?  
O150 W40 O148 158.3 (11) . . ?  
O149 W40 O148 81.6 (11) . . ?  
O153 W40 O142 167.5 (15) . . ?  
O152 W40 O142 86.6 (12) . . ?  
O150 W40 O142 85.1 (11) . . ?  
O149 W40 O142 73.9 (11) . . ?  
O148 W40 O142 73.5 (10) . . ?

O118 W41 O115 102.3 (12) . . ?  
O118 W41 O127 101.7 (11) . . ?  
O115 W41 O127 91.8 (12) . . ?  
O118 W41 O194 94.1 (11) . . ?  
O115 W41 O194 98.0 (11) . . ?  
O127 W41 O194 159.3 (10) . . ?  
O118 W41 O192 162.9 (11) . . ?  
O115 W41 O192 92.5 (11) . . ?  
O127 W41 O192 86.2 (10) . . ?  
O194 W41 O192 75.2 (10) . . ?  
O118 W41 O128 84.9 (10) . . ?  
O115 W41 O128 170.4 (11) . . ?  
O127 W41 O128 80.4 (10) . . ?  
O194 W41 O128 87.8 (10) . . ?  
O192 W41 O128 81.5 (9) . . ?  
O118 W41 Tb5 129.9 (9) . . ?  
O115 W41 Tb5 93.4 (9) . . ?  
O127 W41 Tb5 125.3 (8) . . ?  
O194 W41 Tb5 36.3 (7) . . ?  
O192 W41 Tb5 39.2 (7) . . ?  
O128 W41 Tb5 86.7 (6) . . ?  
O118 W41 Cs3 151.0 (9) . . ?  
O115 W41 Cs3 54.9 (8) . . ?  
O127 W41 Cs3 65.2 (8) . . ?  
O194 W41 Cs3 106.0 (7) . . ?  
O192 W41 Cs3 46.2 (7) . . ?  
O128 W41 Cs3 116.1 (6) . . ?  
Tb5 W41 Cs3 74.06 (7) . . ?  
O159 W42 O158 104.2 (13) . . ?  
O159 W42 O160 91.1 (13) . . ?  
O158 W42 O160 101.9 (12) . . ?  
O159 W42 O173 96.4 (13) . . ?  
O158 W42 O173 93.2 (13) . . ?  
O160 W42 O173 161.0 (11) . . ?  
O159 W42 O178 165.7 (12) . . ?  
O158 W42 O178 90.2 (12) . . ?  
O160 W42 O178 85.5 (11) . . ?  
O173 W42 O178 82.9 (12) . . ?  
O159 W42 O176 93.5 (12) . . ?  
O158 W42 O176 159.3 (12) . . ?  
O160 W42 O176 88.2 (11) . . ?  
O173 W42 O176 74.0 (12) . . ?  
O178 W42 O176 72.5 (10) . . ?  
O159 W42 K4 60.3 (10) . . ?  
O158 W42 K4 46.4 (9) . . ?  
O160 W42 K4 87.9 (7) . . ?  
O173 W42 K4 111.0 (9) . . ?  
O178 W42 K4 133.3 (8) . . ?  
O176 W42 K4 153.4 (7) . . ?  
O161 W43 O113 104.8 (12) . . ?  
O161 W43 O162 94.9 (12) . . ?  
O113 W43 O162 96.3 (11) . . ?  
O161 W43 O160 92.1 (12) . . ?  
O113 W43 O160 100.3 (11) . . ?  
O162 W43 O160 159.7 (10) . . ?  
O161 W43 O179 160.1 (12) . . ?  
O113 W43 O179 95.1 (11) . . ?  
O162 W43 O179 83.0 (11) . . ?  
O160 W43 O179 84.0 (11) . . ?  
O161 W43 O175 86.5 (11) . . ?  
O113 W43 O175 166.3 (11) . . ?  
O162 W43 O175 74.7 (11) . . ?  
O160 W43 O175 86.7 (10) . . ?  
O179 W43 O175 73.8 (10) . . ?

O161 W43 Cs2 126.4 (9) . . ?  
O113 W43 Cs2 50.8 (8) . . ?  
O162 W43 Cs2 129.9 (8) . . ?  
O160 W43 Cs2 57.0 (7) . . ?  
O179 W43 Cs2 67.0 (8) . . ?  
O175 W43 Cs2 127.9 (7) . . ?  
O161 W43 Cs3 56.3 (10) . . ?  
O113 W43 Cs3 83.1 (8) . . ?  
O162 W43 Cs3 46.3 (8) . . ?  
O160 W43 Cs3 147.5 (7) . . ?  
O179 W43 Cs3 128.2 (8) . . ?  
O175 W43 Cs3 97.3 (7) . . ?  
Cs2 W43 Cs3 133.83 (8) . . ?  
O164 W44 O163 104.4 (13) . . ?  
O164 W44 O165 101.6 (14) . . ?  
O163 W44 O165 91.1 (12) . . ?  
O164 W44 O162 100.3 (13) . . ?  
O163 W44 O162 90.6 (11) . . ?  
O165 W44 O162 156.9 (12) . . ?  
O164 W44 O180 93.4 (13) . . ?  
O163 W44 O180 162.2 (12) . . ?  
O165 W44 O180 85.9 (12) . . ?  
O162 W44 O180 85.5 (11) . . ?  
O164 W44 O175 163.8 (12) . . ?  
O163 W44 O175 90.0 (11) . . ?  
O165 W44 O175 85.2 (11) . . ?  
O162 W44 O175 71.8 (10) . . ?  
O180 W44 O175 72.2 (11) . . ?  
O164 W44 Cs3 82.3 (11) . . ?  
O163 W44 Cs3 47.4 (8) . . ?  
O165 W44 Cs3 136.9 (9) . . ?  
O162 W44 Cs3 53.9 (7) . . ?  
O180 W44 Cs3 137.1 (8) . . ?  
O175 W44 Cs3 102.9 (7) . . ?  
O167 W45 O166 101.8 (14) . . ?  
O167 W45 O168 103.2 (15) . . ?  
O166 W45 O168 93.5 (14) . . ?  
O167 W45 O181 100.0 (16) . . ?  
O166 W45 O181 157.1 (15) . . ?  
O168 W45 O181 88.0 (16) . . ?  
O167 W45 O165 99.6 (14) . . ?  
O166 W45 O165 84.6 (12) . . ?  
O168 W45 O165 156.9 (13) . . ?  
O181 W45 O165 85.1 (15) . . ?  
O167 W45 O174 171.3 (13) . . ?  
O166 W45 O174 86.2 (11) . . ?  
O168 W45 O174 72.6 (12) . . ?  
O181 W45 O174 72.5 (14) . . ?  
O165 W45 O174 84.3 (11) . . ?  
O373 W46 O170 100.2 (15) . . ?  
O373 W46 O196 103.0 (14) . . ?  
O170 W46 O196 89.0 (14) . . ?  
O373 W46 O182 105.1 (15) . . ?  
O170 W46 O182 91.5 (15) . . ?  
O196 W46 O182 151.3 (14) . . ?  
O373 W46 O168 96.8 (14) . . ?  
O170 W46 O168 163.0 (15) . . ?  
O196 W46 O168 86.4 (14) . . ?  
O182 W46 O168 84.8 (15) . . ?  
O373 W46 O174 169.0 (12) . . ?  
O170 W46 O174 90.5 (13) . . ?  
O196 W46 O174 79.2 (11) . . ?  
O182 W46 O174 72.1 (13) . . ?  
O168 W46 O174 72.5 (12) . . ?

O172 W47 O171 102.4 (16) . . ?  
O172 W47 O173 102.3 (15) . . ?  
O171 W47 O173 96.0 (13) . . ?  
O172 W47 O170 105.2 (16) . . ?  
O171 W47 O170 86.7 (14) . . ?  
O173 W47 O170 151.1 (14) . . ?  
O172 W47 O177 94.3 (15) . . ?  
O171 W47 O177 162.4 (14) . . ?  
O173 W47 O177 85.7 (13) . . ?  
O170 W47 O177 83.6 (14) . . ?  
O172 W47 O176 161.3 (13) . . ?  
O171 W47 O176 94.9 (13) . . ?  
O173 W47 O176 68.5 (11) . . ?  
O170 W47 O176 82.6 (13) . . ?  
O177 W47 O176 69.4 (12) . . ?  
O172 W47 Cs6 24.4 (12) . 1\_565 ?  
O171 W47 Cs6 78.9 (11) . 1\_565 ?  
O173 W47 Cs6 111.2 (9) . 1\_565 ?  
O170 W47 Cs6 97.6 (11) . 1\_565 ?  
O177 W47 Cs6 116.8 (10) . 1\_565 ?  
O176 W47 Cs6 173.8 (7) . 1\_565 ?  
O188 W48 O177 100.0 (17) . . ?  
O188 W48 O178 102.2 (15) . . ?  
O177 W48 O178 91.9 (14) . . ?  
O188 W48 O184 100.6 (15) . . ?  
O177 W48 O184 158.4 (13) . . ?  
O178 W48 O184 90.1 (13) . . ?  
O188 W48 O185 100.5 (15) . . ?  
O177 W48 O185 88.2 (14) . . ?  
O178 W48 O185 156.9 (12) . . ?  
O184 W48 O185 81.7 (13) . . ?  
O188 W48 O176 173.8 (15) . . ?  
O177 W48 O176 76.1 (13) . . ?  
O178 W48 O176 73.3 (11) . . ?  
O184 W48 O176 84.0 (11) . . ?  
O185 W48 O176 84.3 (11) . . ?  
O187 W49 O180 101.1 (13) . . ?  
O187 W49 O179 103.1 (13) . . ?  
O180 W49 O179 92.6 (12) . . ?  
O187 W49 O184 100.5 (13) . . ?  
O180 W49 O184 155.7 (12) . . ?  
O179 W49 O184 93.3 (12) . . ?  
O187 W49 O183 98.0 (13) . . ?  
O180 W49 O183 83.4 (12) . . ?  
O179 W49 O183 158.9 (12) . . ?  
O184 W49 O183 82.7 (12) . . ?  
O187 W49 O175 173.6 (12) . . ?  
O180 W49 O175 74.6 (11) . . ?  
O179 W49 O175 72.6 (11) . . ?  
O184 W49 O175 84.7 (11) . . ?  
O183 W49 O175 86.4 (11) . . ?  
O186 W50 O185 103.7 (16) . . ?  
O186 W50 O183 100.1 (16) . . ?  
O185 W50 O183 89.7 (13) . . ?  
O186 W50 O182 99.1 (17) . . ?  
O185 W50 O182 88.8 (14) . . ?  
O183 W50 O182 160.5 (14) . . ?  
O186 W50 O181 99.7 (17) . . ?  
O185 W50 O181 156.0 (15) . . ?  
O183 W50 O181 91.1 (15) . . ?  
O182 W50 O181 82.6 (16) . . ?  
O186 W50 O174 168.3 (14) . . ?  
O185 W50 O174 84.0 (11) . . ?  
O183 W50 O174 88.6 (11) . . ?

O182 W50 O174 71.9(13) . . ?  
O181 W50 O174 72.0(13) . . ?  
O195 W51 O193 100.0(15) . . ?  
O195 W51 O197 103.1(15) . . ?  
O193 W51 O197 94.7(14) . . ?  
O195 W51 O196 94.3(14) . . ?  
O193 W51 O196 98.2(13) . . ?  
O197 W51 O196 156.2(14) . . ?  
O195 W51 O198 85.6(15) . . ?  
O193 W51 O198 174.1(15) . . ?  
O197 W51 O198 82.4(15) . . ?  
O196 W51 O198 82.8(14) . . ?  
O195 W51 O171 171.5(14) . . ?  
O193 W51 O171 86.3(13) . . ?  
O197 W51 O171 82.0(13) . . ?  
O196 W51 O171 79.1(12) . . ?  
O198 W51 O171 88.3(13) . . ?  
O195 W51 K12 79.4(12) . . ?  
O193 W51 K12 157.3(11) . . ?  
O197 W51 K12 63.8(11) . . ?  
O196 W51 K12 104.5(9) . . ?  
O198 W51 K12 22.2(11) . . ?  
O171 W51 K12 97.1(9) . . ?  
K12 W52 O199 154.7(17) . . ?  
K12 W52 O198 97.6(16) . . ?  
O199 W52 O198 106.8(17) . . ?  
K12 W52 O200 69.3(15) . . ?  
O199 W52 O200 103.2(16) . . ?  
O198 W52 O200 90.3(15) . . ?  
K12 W52 O134 82.2(15) . . ?  
O199 W52 O134 104.9(16) . . ?  
O198 W52 O134 88.4(16) . . ?  
O200 W52 O134 150.9(14) . . ?  
K12 W52 O217 63.2(15) . . ?  
O199 W52 O217 93.1(17) . . ?  
O198 W52 O217 159.8(16) . . ?  
O200 W52 O217 88.1(15) . . ?  
O134 W52 O217 83.3(15) . . ?  
K12 W52 O215 11.3(14) . . ?  
O199 W52 O215 165.6(15) . . ?  
O198 W52 O215 86.3(14) . . ?  
O200 W52 O215 70.1(13) . . ?  
O134 W52 O215 80.8(13) . . ?  
O217 W52 O215 74.2(14) . . ?  
K12 W52 Cs8 31.3(13) . . ?  
O199 W52 Cs8 141.9(12) . . ?  
O198 W52 Cs8 86.5(12) . . ?  
O200 W52 Cs8 39.9(10) . . ?  
O134 W52 Cs8 111.1(10) . . ?  
O217 W52 Cs8 79.5(11) . . ?  
O215 W52 Cs8 30.3(8) . . ?  
K12 W52 Cs6 130.5(13) . 1\_565 ?  
O199 W52 Cs6 51.4(13) . 1\_565 ?  
O198 W52 Cs6 101.7(12) . 1\_565 ?  
O200 W52 Cs6 154.0(10) . 1\_565 ?  
O134 W52 Cs6 53.6(10) . 1\_565 ?  
O217 W52 Cs6 88.1(11) . 1\_565 ?  
O215 W52 Cs6 132.9(8) . 1\_565 ?  
Cs8 W52 Cs6 161.7(2) . 1\_565 ?  
K12 W52 Cs7 21.5(12) . . ?  
O199 W52 Cs7 134.7(13) . . ?  
O198 W52 Cs7 118.4(12) . . ?  
O200 W52 Cs7 76.1(10) . . ?  
O134 W52 Cs7 79.1(10) . . ?

O217 W52 Cs7 41.9(11) . . ?  
O215 W52 Cs7 32.4(9) . . ?  
Cs8 W52 Cs7 46.1(3) . . ?  
Cs6 W52 Cs7 116.4(2) 1\_565 . ?  
O213 W53 O134 99.8(15) . . ?  
O213 W53 O219 100.8(16) . . ?  
O134 W53 O219 87.2(15) . . ?  
O213 W53 O212 97.8(14) . . ?  
O134 W53 O212 162.4(13) . . ?  
O219 W53 O212 88.3(14) . . ?  
O213 W53 O197 105.0(15) . . ?  
O134 W53 O197 87.5(14) . . ?  
O219 W53 O197 154.2(14) . . ?  
O212 W53 O197 89.2(13) . . ?  
O213 W53 O214 171.8(14) . . ?  
O134 W53 O214 87.9(12) . . ?  
O219 W53 O214 76.4(13) . . ?  
O212 W53 O214 74.5(11) . . ?  
O197 W53 O214 78.2(13) . . ?  
O213 W53 K12 122.4(12) . . ?  
O134 W53 K12 25.2(10) . . ?  
O219 W53 K12 93.2(11) . . ?  
O212 W53 K12 138.5(9) . . ?  
O197 W53 K12 72.2(10) . . ?  
O214 W53 K12 65.7(8) . . ?  
O213 W53 Cs6 48.5(12) . 1\_565 ?  
O134 W53 Cs6 52.4(10) . 1\_565 ?  
O219 W53 Cs6 87.5(10) . 1\_565 ?  
O212 W53 Cs6 144.3(9) . 1\_565 ?  
O197 W53 Cs6 108.9(10) . 1\_565 ?  
O214 W53 Cs6 138.1(8) . 1\_565 ?  
K12 W53 Cs6 77.1(3) . 1\_565 ?  
O210 W54 O211 103.7(17) . . ?  
O210 W54 O209 101.8(17) . . ?  
O211 W54 O209 93.8(16) . . ?  
O210 W54 O212 97.7(15) . . ?  
O211 W54 O212 93.5(14) . . ?  
O209 W54 O212 156.9(15) . . ?  
O210 W54 O218 92.7(17) . . ?  
O211 W54 O218 163.5(14) . . ?  
O209 W54 O218 84.2(16) . . ?  
O212 W54 O218 82.6(13) . . ?  
O210 W54 O214 161.9(16) . . ?  
O211 W54 O214 92.2(13) . . ?  
O209 W54 O214 85.4(14) . . ?  
O212 W54 O214 72.4(11) . . ?  
O218 W54 O214 71.3(13) . . ?  
O210 W54 K9 48.7(14) . . ?  
O211 W54 K9 152.0(11) . . ?  
O209 W54 K9 88.5(13) . . ?  
O212 W54 K9 95.2(9) . . ?  
O218 W54 K9 44.5(10) . . ?  
O214 W54 K9 115.8(8) . . ?  
O210 W54 Cs5 54.2(13) . . ?  
O211 W54 Cs5 70.4(11) . . ?  
O209 W54 Cs5 63.2(12) . . ?  
O212 W54 Cs5 139.7(9) . . ?  
O218 W54 Cs5 122.2(10) . . ?  
O214 W54 Cs5 141.9(7) . . ?  
K9 W54 Cs5 86.0(2) . . ?  
Na10 W55 O208 97.3(19) . . ?  
Na10 W55 O206 93(2) . . ?  
O208 W55 O206 169(2) . . ?  
Na10 W55 O209 101.5(18) . . ?

O208 W55 O209 94.6(17) . . ?  
O206 W55 O209 85.4(19) . . ?  
Na10 W55 O220 98.8(13) . . ?  
O208 W55 O220 92.7(12) . . ?  
O206 W55 O220 83.5(15) . . ?  
O209 W55 O220 157.3(12) . . ?  
Na10 W55 O216 168.0(17) . . ?  
O208 W55 O216 91.7(16) . . ?  
O206 W55 O216 77.7(18) . . ?  
O209 W55 O216 85.5(15) . . ?  
O220 W55 O216 72.8(9) . . ?  
Na10 W55 K11 109.6(14) . . ?  
O208 W55 K11 150.7(13) . . ?  
O206 W55 K11 19.0(15) . . ?  
O209 W55 K11 91.2(13) . . ?  
O220 W55 K11 72.4(3) . . ?  
O216 W55 K11 60.1(10) . . ?  
Na10 W55 Cs5 54.7(13) . . ?  
O208 W55 Cs5 69.0(12) . . ?  
O206 W55 Cs5 119.5(15) . . ?  
O209 W55 Cs5 59.4(12) . . ?  
O220 W55 Cs5 142.91(18) . . ?  
O216 W55 Cs5 136.8(9) . . ?  
K11 W55 Cs5 136.7(3) . . ?  
O205 W56 O204 106(2) . . ?  
O205 W56 O203 95(2) . . ?  
O204 W56 O203 97.6(19) . . ?  
O205 W56 O220 95.0(15) . . ?  
O204 W56 O220 97.3(12) . . ?  
O203 W56 O220 158.9(14) . . ?  
O205 W56 O222 96(2) . . ?  
O204 W56 O222 158.6(16) . . ?  
O203 W56 O222 78.1(18) . . ?  
O220 W56 O222 82.6(11) . . ?  
O205 W56 O216 165.7(18) . . ?  
O204 W56 O216 87.2(16) . . ?  
O203 W56 O216 89.0(16) . . ?  
O220 W56 O216 76.9(10) . . ?  
O222 W56 O216 71.9(15) . . ?  
O205 W56 Cs8 107.7(16) . . ?  
O204 W56 Cs8 80.5(12) . . ?  
O203 W56 Cs8 19.0(14) . . ?  
O220 W56 Cs8 156.9(3) . . ?  
O222 W56 Cs8 91.2(12) . . ?  
O216 W56 Cs8 80.0(10) . . ?  
O205 W56 K11 114.6(16) . . ?  
O204 W56 K11 135.0(12) . . ?  
O203 W56 K11 98.0(14) . . ?  
O220 W56 K11 61.0(2) . . ?  
O222 W56 K11 28.9(12) . . ?  
O216 W56 K11 51.2(10) . . ?  
Cs8 W56 K11 104.5(4) . . ?  
O205 W56 Cs7 126.7(16) . . ?  
O204 W56 Cs7 114.8(12) . . ?  
O203 W56 Cs7 48.0(14) . . ?  
O220 W56 Cs7 111.8(2) . . ?  
O222 W56 Cs7 47.3(11) . . ?  
O216 W56 Cs7 48.9(10) . . ?  
Cs8 W56 Cs7 51.0(4) . . ?  
K11 W56 Cs7 53.5(3) . . ?  
Cs8 W57 O202 100.0(15) . . ?  
Cs8 W57 O201 87.6(14) . . ?  
O202 W57 O201 104.3(19) . . ?  
Cs8 W57 O200 158.9(12) . . ?

O202 W57 O200 99.8(16) . . ?  
O201 W57 O200 94.2(15) . . ?  
Cs8 W57 O221 85.2(13) . . ?  
O202 W57 O221 95.6(18) . . ?  
O201 W57 O221 159.7(16) . . ?  
O200 W57 O221 85.9(15) . . ?  
Cs8 W57 O203 5.6(13) . . ?  
O202 W57 O203 96.1(17) . . ?  
O201 W57 O203 92.5(16) . . ?  
O200 W57 O203 160.6(15) . . ?  
O221 W57 O203 81.5(16) . . ?  
Cs8 W57 O215 82.4(11) . . ?  
O202 W57 O215 167.4(17) . . ?  
O201 W57 O215 88.2(15) . . ?  
O200 W57 O215 76.7(13) . . ?  
O221 W57 O215 72.1(15) . . ?  
O203 W57 O215 85.3(14) . . ?  
Cs8 W57 K12 116.9(8) . . ?  
O202 W57 K12 139.4(14) . . ?  
O201 W57 K12 94.0(12) . . ?  
O200 W57 K12 42.1(10) . . ?  
O221 W57 K12 72.6(11) . . ?  
O203 W57 K12 119.3(12) . . ?  
O215 W57 K12 34.8(10) . . ?  
Cs8 W57 Cs7 65.9(8) . . ?  
O202 W57 Cs7 124.6(14) . . ?  
O201 W57 Cs7 126.6(12) . . ?  
O200 W57 Cs7 96.8(10) . . ?  
O221 W57 Cs7 33.7(11) . . ?  
O203 W57 Cs7 64.8(12) . . ?  
O215 W57 Cs7 45.1(10) . . ?  
K12 W57 Cs7 63.4(5) . . ?  
Cs7 W58 O227 94.8(18) . . ?  
Cs7 W58 O221 90.1(14) . . ?  
O227 W58 O221 100(2) . . ?  
Cs7 W58 O224 82.6(12) . . ?  
O227 W58 O224 100(2) . . ?  
O221 W58 O224 158.7(17) . . ?  
Cs7 W58 O217 163.3(13) . . ?  
O227 W58 O217 101(2) . . ?  
O221 W58 O217 93.4(16) . . ?  
O224 W58 O217 88.4(15) . . ?  
Cs7 W58 O215 86.0(11) . . ?  
O227 W58 O215 173.3(19) . . ?  
O221 W58 O215 73.1(15) . . ?  
O224 W58 O215 86.4(14) . . ?  
O217 W58 O215 79.5(15) . . ?  
Cs7 W58 K12 121.9(7) . . ?  
O227 W58 K12 143.2(17) . . ?  
O221 W58 K12 78.6(13) . . ?  
O224 W58 K12 88.3(12) . . ?  
O217 W58 K12 43.5(12) . . ?  
O215 W58 K12 36.0(9) . . ?  
Cs7 W58 Cs8 73.0(7) . . ?  
O227 W58 Cs8 131.3(17) . . ?  
O221 W58 Cs8 35.5(13) . . ?  
O224 W58 Cs8 123.4(11) . . ?  
O217 W58 Cs8 101.0(12) . . ?  
O215 W58 Cs8 42.7(9) . . ?  
K12 W58 Cs8 65.2(5) . . ?  
O226 W59 O225 104.9(18) . . ?  
O226 W59 O218 104.3(18) . . ?  
O225 W59 O218 93.6(16) . . ?  
O226 W59 O224 95.6(17) . . ?



O225 W59 O224 88.7(15) . . ?  
O218 W59 O224 158.7(16) . . ?  
O226 W59 O219 94.8(17) . . ?  
O225 W59 O219 159.0(16) . . ?  
O218 W59 O219 88.6(14) . . ?  
O224 W59 O219 81.9(14) . . ?  
O226 W59 O214 168.1(15) . . ?  
O225 W59 O214 87.0(14) . . ?  
O218 W59 O214 75.4(14) . . ?  
O224 W59 O214 83.6(13) . . ?  
O219 W59 O214 73.3(12) . . ?  
O226 W59 Cs7 108.1(14) . . ?  
O225 W59 Cs7 54.5(12) . . ?  
O218 W59 Cs7 139.1(11) . . ?  
O224 W59 Cs7 34.7(10) . . ?  
O219 W59 Cs7 112.4(10) . . ?  
O214 W59 Cs7 77.8(8) . . ?  
K11 W60 O228 72.1(18) . . ?  
K11 W60 O222 84.2(14) . . ?  
O228 W60 O222 102(2) . . ?  
K11 W60 O225 102.7(13) . . ?  
O228 W60 O225 100.7(19) . . ?  
O222 W60 O225 157.2(17) . . ?  
K11 W60 O206 30.5(15) . . ?  
O228 W60 O206 100(2) . . ?  
O222 W60 O206 90.3(18) . . ?  
O225 W60 O206 85.5(17) . . ?  
K11 W60 O216 98.2(12) . . ?  
O228 W60 O216 169.5(19) . . ?  
O222 W60 O216 72.1(16) . . ?  
O225 W60 O216 85.3(15) . . ?  
O206 W60 O216 71.7(16) . . ?  
K11 W60 Cs7 177.9(9) . . ?  
O228 W60 Cs7 105.8(16) . . ?  
O222 W60 Cs7 96.7(13) . . ?  
O225 W60 Cs7 77.2(11) . . ?  
O206 W60 Cs7 151.2(13) . . ?  
O216 W60 Cs7 83.9(10) . . ?  
K11 W60 Cs8 128.9(8) . . ?  
O228 W60 Cs8 134.0(16) . . ?  
O222 W60 Cs8 51.7(13) . . ?  
O225 W60 Cs8 110.4(11) . . ?  
O206 W60 Cs8 115.0(14) . . ?  
O216 W60 Cs8 49.2(9) . . ?  
Cs7 W60 Cs8 52.8(4) . . ?  
O190 W61 O169 101.3(13) . . ?  
O190 W61 O307 94.8(12) . . ?  
O169 W61 O307 100.6(12) . . ?  
O190 W61 O166 103.7(12) . . ?  
O169 W61 O166 89.7(13) . . ?  
O307 W61 O166 156.7(12) . . ?  
O190 W61 O308 160.7(11) . . ?  
O169 W61 O308 96.6(12) . . ?  
O307 W61 O308 74.4(11) . . ?  
O166 W61 O308 83.7(12) . . ?  
O190 W61 O163 84.1(11) . . ?  
O169 W61 O163 165.7(12) . . ?  
O307 W61 O163 92.1(11) . . ?  
O166 W61 O163 76.1(11) . . ?  
O308 W61 O163 80.3(10) . . ?  
O190 W61 W62 131.7(9) . . ?  
O169 W61 W62 97.1(10) . . ?  
O307 W61 W62 37.7(8) . . ?  
O166 W61 W62 120.8(9) . . ?

O308 W61 W62 37.1(8) . . ?  
O163 W61 W62 88.8(7) . . ?  
O190 W61 Cs3 71.4(9) . . ?  
O169 W61 Cs3 147.3(10) . . ?  
O307 W61 Cs3 50.3(8) . . ?  
O166 W61 Cs3 123.0(9) . . ?  
O308 W61 Cs3 89.6(8) . . ?  
O163 W61 Cs3 47.0(7) . . ?  
W62 W61 Cs3 69.21(8) . . ?  
O306 W62 O262 100.2(16) . . ?  
O306 W62 O233 93.4(15) . . ?  
O262 W62 O233 101.8(15) . . ?  
O306 W62 O308 104.7(14) . . ?  
O262 W62 O308 90.1(14) . . ?  
O233 W62 O308 156.3(13) . . ?  
O306 W62 O307 93.3(14) . . ?  
O262 W62 O307 161.5(14) . . ?  
O233 W62 O307 89.8(12) . . ?  
O308 W62 O307 74.2(11) . . ?  
O306 W62 O234 169.7(14) . . ?  
O262 W62 O234 84.9(14) . . ?  
O233 W62 O234 76.7(13) . . ?  
O308 W62 O234 84.1(12) . . ?  
O307 W62 O234 83.9(11) . . ?  
O306 W62 W61 104.2(12) . . ?  
O262 W62 W61 128.7(11) . . ?  
O233 W62 W61 120.6(10) . . ?  
O308 W62 W61 40.4(8) . . ?  
O307 W62 W61 34.2(7) . . ?  
O234 W62 W61 78.9(9) . . ?  
O306 W62 Cs3 45.5(12) . . ?  
O262 W62 Cs3 143.2(11) . . ?  
O233 W62 Cs3 94.4(9) . . ?  
O308 W62 Cs3 87.8(8) . . ?  
O307 W62 Cs3 47.9(7) . . ?  
O234 W62 Cs3 131.3(9) . . ?  
W61 W62 Cs3 64.80(7) . . ?  
O248 W63 O309 99.5(19) . . ?  
O248 W63 O254 99(2) . . ?  
O309 W63 O254 87.0(17) . . ?  
O248 W63 O233 103.1(17) . . ?  
O309 W63 O233 87.4(15) . . ?  
O254 W63 O233 158.0(16) . . ?  
O248 W63 O247 101.4(19) . . ?  
O309 W63 O247 158.9(16) . . ?  
O254 W63 O247 87.1(18) . . ?  
O233 W63 O247 90.5(15) . . ?  
O248 W63 O363 164.7(17) . . ?  
O309 W63 O363 87.6(14) . . ?  
O254 W63 O363 67.9(16) . . ?  
O233 W63 O363 90.7(13) . . ?  
O247 W63 O363 71.4(14) . . ?  
O231 W64 O234 102.4(15) . . ?  
O231 W64 O235 95.9(16) . . ?  
O234 W64 O235 94.5(15) . . ?  
O231 W64 O309 105.2(16) . . ?  
O234 W64 O309 89.7(15) . . ?  
O235 W64 O309 157.1(16) . . ?  
O231 W64 O249 96.0(16) . . ?  
O234 W64 O249 161.6(16) . . ?  
O235 W64 O249 84.4(15) . . ?  
O309 W64 O249 84.6(15) . . ?  
O231 W64 O361 162.4(14) . . ?  
O234 W64 O361 91.7(14) . . ?

O235 W64 O361 72.2 (15) . . ?  
O309 W64 O361 85.2 (14) . . ?  
O249 W64 O361 70.4 (15) . . ?  
O236 W65 O237 108.5 (16) . . ?  
O236 W65 O238 92.3 (16) . . ?  
O237 W65 O238 100.0 (16) . . ?  
O236 W65 O235 93.2 (16) . . ?  
O237 W65 O235 96.7 (16) . . ?  
O238 W65 O235 159.7 (16) . . ?  
O236 W65 O250 161.6 (16) . . ?  
O237 W65 O250 89.4 (16) . . ?  
O238 W65 O250 88.1 (16) . . ?  
O235 W65 O250 80.7 (16) . . ?  
O236 W65 O361 87.1 (15) . . ?  
O237 W65 O361 162.5 (15) . . ?  
O238 W65 O361 86.9 (15) . . ?  
O235 W65 O361 73.9 (15) . . ?  
O250 W65 O361 74.6 (14) . . ?  
O239 W66 O240 106 (2) . . ?  
O239 W66 O238 91.6 (19) . . ?  
O240 W66 O238 101 (2) . . ?  
O239 W66 O241 97 (2) . . ?  
O240 W66 O241 94 (2) . . ?  
O238 W66 O241 160.0 (17) . . ?  
O239 W66 O251 159 (2) . . ?  
O240 W66 O251 94 (2) . . ?  
O238 W66 O251 86 (2) . . ?  
O241 W66 O251 80 (2) . . ?  
O239 W66 O362 87.3 (17) . . ?  
O240 W66 O362 164 (2) . . ?  
O238 W66 O362 87.1 (15) . . ?  
O241 W66 O362 75.1 (17) . . ?  
O251 W66 O362 72.1 (19) . . ?  
O239 W66 Na16 94.4 (15) . . ?  
O240 W66 Na16 22.7 (19) . . ?  
O238 W66 Na16 82.4 (12) . . ?  
O241 W66 Na16 114.9 (14) . . ?  
O251 W66 Na16 105.7 (16) . . ?  
O362 W66 Na16 169.5 (12) . . ?  
O243 W67 O242 101 (2) . . ?  
O243 W67 O244 109 (3) . . ?  
O242 W67 O244 85.9 (19) . . ?  
O243 W67 O252 98 (3) . . ?  
O242 W67 O252 161 (2) . . ?  
O244 W67 O252 85 (2) . . ?  
O243 W67 O241 99 (3) . . ?  
O242 W67 O241 97.4 (18) . . ?  
O244 W67 O241 151 (2) . . ?  
O252 W67 O241 83 (2) . . ?  
O243 W67 O362 166 (2) . . ?  
O242 W67 O362 92.8 (16) . . ?  
O244 W67 O362 75.9 (19) . . ?  
O252 W67 O362 69 (2) . . ?  
O241 W67 O362 74.9 (17) . . ?  
O246 W68 O245 109 (2) . . ?  
O246 W68 O253 98 (2) . . ?  
O245 W68 O253 153.2 (19) . . ?  
O246 W68 O244 106 (2) . . ?  
O245 W68 O244 84.7 (19) . . ?  
O253 W68 O244 89 (2) . . ?  
O246 W68 O247 93.9 (19) . . ?  
O245 W68 O247 88.4 (17) . . ?  
O253 W68 O247 88.1 (18) . . ?  
O244 W68 O247 159.7 (19) . . ?

O246 W68 O363 163.2(18) . . ?  
O245 W68 O363 81.3(15) . . ?  
O253 W68 O363 72.3(16) . . ?  
O244 W68 O363 87.8(18) . . ?  
O247 W68 O363 72.3(15) . . ?  
O260 W69 O255 101(3) . . ?  
O260 W69 O257 104(3) . . ?  
O255 W69 O257 90(2) . . ?  
O260 W69 O254 101(3) . . ?  
O255 W69 O254 90(2) . . ?  
O257 W69 O254 153.9(19) . . ?  
O260 W69 O253 98(3) . . ?  
O255 W69 O253 160(2) . . ?  
O257 W69 O253 89.3(19) . . ?  
O254 W69 O253 82.4(18) . . ?  
O260 W69 O363 165(2) . . ?  
O255 W69 O363 89.7(18) . . ?  
O257 W69 O363 85.5(16) . . ?  
O254 W69 O363 68.4(16) . . ?  
O253 W69 O363 70.6(15) . . ?  
O258 W70 O251 98(3) . . ?  
O258 W70 O252 102(3) . . ?  
O251 W70 O252 86(3) . . ?  
O258 W70 O256 102(2) . . ?  
O251 W70 O256 93(2) . . ?  
O252 W70 O256 156(2) . . ?  
O258 W70 O257 105(2) . . ?  
O251 W70 O257 157(2) . . ?  
O252 W70 O257 90(2) . . ?  
O256 W70 O257 81.6(19) . . ?  
O258 W70 O362 171(2) . . ?  
O251 W70 O362 76(2) . . ?  
O252 W70 O362 71(2) . . ?  
O256 W70 O362 85.6(16) . . ?  
O257 W70 O362 81.2(16) . . ?  
O259 W71 O256 104(2) . . ?  
O259 W71 O249 100(2) . . ?  
O256 W71 O249 154.9(18) . . ?  
O259 W71 O250 98(2) . . ?  
O256 W71 O250 91.8(18) . . ?  
O249 W71 O250 90.9(17) . . ?  
O259 W71 O255 101(2) . . ?  
O256 W71 O255 83(2) . . ?  
O249 W71 O255 85.9(18) . . ?  
O250 W71 O255 160.2(18) . . ?  
O259 W71 O361 170(2) . . ?  
O256 W71 O361 83.4(16) . . ?  
O249 W71 O361 73.3(15) . . ?  
O250 W71 O361 75.2(15) . . ?  
O255 W71 O361 85.2(16) . . ?  
O302 W72 O261 98.5(16) . . ?  
O302 W72 O284 100.2(15) . . ?  
O261 W72 O284 91.2(16) . . ?  
O302 W72 O245 95.9(16) . . ?  
O261 W72 O245 97.3(16) . . ?  
O284 W72 O245 160.5(16) . . ?  
O302 W72 O281 88.2(14) . . ?  
O261 W72 O281 171.6(14) . . ?  
O284 W72 O281 82.6(15) . . ?  
O245 W72 O281 86.9(15) . . ?  
O302 W72 O242 172.9(15) . . ?  
O261 W72 O242 84.7(15) . . ?  
O284 W72 O242 86.0(15) . . ?  
O245 W72 O242 77.4(15) . . ?

O281 W72 O242 89.1 (14) . . ?  
O282 W73 O281 104.9 (19) . . ?  
O282 W73 O283 100.7 (19) . . ?  
O281 W73 O283 91.1 (16) . . ?  
O282 W73 O280 102.9 (18) . . ?  
O281 W73 O280 91.8 (14) . . ?  
O283 W73 O280 154.5 (15) . . ?  
O282 W73 O291 94 (2) . . ?  
O281 W73 O291 161.1 (16) . . ?  
O283 W73 O291 85.7 (17) . . ?  
O280 W73 O291 83.4 (16) . . ?  
O282 W73 O289 164.8 (17) . . ?  
O281 W73 O289 89.8 (13) . . ?  
O283 W73 O289 82.4 (13) . . ?  
O280 W73 O289 72.3 (11) . . ?  
O291 W73 O289 71.3 (14) . . ?  
O282 W73 K6 36.8 (15) . . ?  
O281 W73 K6 106.8 (10) . . ?  
O283 W73 K6 64.1 (12) . . ?  
O280 W73 K6 138.3 (9) . . ?  
O291 W73 K6 88.5 (12) . . ?  
O289 W73 K6 142.3 (7) . . ?  
O279 W74 O278 102.2 (17) . . ?  
O279 W74 O277 100.5 (14) . . ?  
O278 W74 O277 93.9 (13) . . ?  
O279 W74 O280 95.5 (15) . . ?  
O278 W74 O280 94.4 (14) . . ?  
O277 W74 O280 160.0 (12) . . ?  
O279 W74 O290 96.8 (16) . . ?  
O278 W74 O290 161.0 (13) . . ?  
O277 W74 O290 82.2 (11) . . ?  
O280 W74 O290 84.0 (13) . . ?  
O279 W74 O289 167.2 (15) . . ?  
O278 W74 O289 88.8 (13) . . ?  
O277 W74 O289 85.0 (10) . . ?  
O280 W74 O289 76.9 (12) . . ?  
O290 W74 O289 72.4 (11) . . ?  
O276 W75 O275 105.1 (13) . . ?  
O276 W75 O277 100.6 (12) . . ?  
O275 W75 O277 92.9 (12) . . ?  
O276 W75 O274 99.2 (12) . . ?  
O275 W75 O274 93.4 (12) . . ?  
O277 W75 O274 156.9 (11) . . ?  
O276 W75 O294 96.7 (12) . . ?  
O275 W75 O294 158.2 (11) . . ?  
O277 W75 O294 82.5 (11) . . ?  
O274 W75 O294 83.5 (12) . . ?  
O276 W75 O288 166.1 (12) . . ?  
O275 W75 O288 87.3 (11) . . ?  
O277 W75 O288 84.8 (10) . . ?  
O274 W75 O288 73.3 (11) . . ?  
O294 W75 O288 71.2 (11) . . ?  
O273 W76 O271 101.9 (17) . . ?  
O273 W76 O274 101.8 (14) . . ?  
O271 W76 O274 93.3 (14) . . ?  
O273 W76 O270 104.0 (15) . . ?  
O271 W76 O270 88.9 (15) . . ?  
O274 W76 O270 153.0 (13) . . ?  
O273 W76 O295 93.5 (15) . . ?  
O271 W76 O295 164.5 (14) . . ?  
O274 W76 O295 84.1 (13) . . ?  
O270 W76 O295 86.7 (14) . . ?  
O273 W76 O288 163.8 (14) . . ?  
O271 W76 O288 93.1 (13) . . ?

O274 W76 O288 71.1 (11) . . ?  
O270 W76 O288 81.9 (11) . . ?  
O295 W76 O288 71.6 (11) . . ?  
O269 W77 O268 102.0 (17) . . ?  
O269 W77 O270 101.1 (15) . . ?  
O268 W77 O270 90.5 (15) . . ?  
O269 W77 O286 99.3 (15) . . ?  
O268 W77 O286 89.7 (15) . . ?  
O270 W77 O286 159.1 (15) . . ?  
O269 W77 O293 99.7 (16) . . ?  
O268 W77 O293 158.1 (15) . . ?  
O270 W77 O293 88.3 (14) . . ?  
O286 W77 O293 83.8 (15) . . ?  
O269 W77 O287 168.8 (15) . . ?  
O268 W77 O287 86.6 (14) . . ?  
O270 W77 O287 85.8 (13) . . ?  
O286 W77 O287 73.3 (13) . . ?  
O293 W77 O287 71.5 (14) . . ?  
O285 W78 O292 101.1 (17) . . ?  
O285 W78 O283 97.6 (17) . . ?  
O292 W78 O283 87.1 (16) . . ?  
O285 W78 O286 101.6 (17) . . ?  
O292 W78 O286 89.6 (15) . . ?  
O283 W78 O286 160.8 (15) . . ?  
O285 W78 O284 103.7 (17) . . ?  
O292 W78 O284 155.1 (14) . . ?  
O283 W78 O284 88.0 (16) . . ?  
O286 W78 O284 87.1 (15) . . ?  
O285 W78 O287 172.9 (16) . . ?  
O292 W78 O287 74.9 (13) . . ?  
O283 W78 O287 88.2 (14) . . ?  
O286 W78 O287 72.7 (13) . . ?  
O284 W78 O287 80.5 (14) . . ?  
O299 W79 O297 99.5 (18) . . ?  
O299 W79 O293 97.7 (18) . . ?  
O297 W79 O293 94.6 (15) . . ?  
O299 W79 O298 102.0 (18) . . ?  
O297 W79 O298 86.7 (14) . . ?  
O293 W79 O298 159.8 (16) . . ?  
O299 W79 O292 98.9 (17) . . ?  
O297 W79 O292 161.4 (15) . . ?  
O293 W79 O292 85.3 (15) . . ?  
O298 W79 O292 87.1 (14) . . ?  
O299 W79 O287 169.3 (17) . . ?  
O297 W79 O287 88.1 (14) . . ?  
O293 W79 O287 74.1 (14) . . ?  
O298 W79 O287 85.8 (13) . . ?  
O292 W79 O287 74.0 (13) . . ?  
O301 W80 O290 100.6 (14) . . ?  
O301 W80 O291 99.3 (17) . . ?  
O290 W80 O291 89.7 (16) . . ?  
O301 W80 O298 99.3 (15) . . ?  
O290 W80 O298 159.9 (15) . . ?  
O291 W80 O298 89.8 (16) . . ?  
O301 W80 O296 101.1 (13) . . ?  
O290 W80 O296 88.9 (12) . . ?  
O291 W80 O296 159.5 (16) . . ?  
O298 W80 O296 84.6 (13) . . ?  
O301 W80 O289 172.7 (13) . . ?  
O290 W80 O289 74.7 (12) . . ?  
O291 W80 O289 75.2 (15) . . ?  
O298 W80 O289 85.7 (13) . . ?  
O296 W80 O289 84.7 (11) . . ?  
O300 W81 O294 100.4 (14) . . ?

O300 W81 O295 98.8 (15) . . ?  
O294 W81 O295 93.1 (14) . . ?  
O300 W81 O296 101.7 (14) . . ?  
O294 W81 O296 88.9 (12) . . ?  
O295 W81 O296 158.7 (13) . . ?  
O300 W81 O297 100.6 (15) . . ?  
O294 W81 O297 158.3 (14) . . ?  
O295 W81 O297 89.2 (14) . . ?  
O296 W81 O297 81.4 (13) . . ?  
O300 W81 O288 171.0 (12) . . ?  
O294 W81 O288 73.2 (11) . . ?  
O295 W81 O288 75.6 (13) . . ?  
O296 W81 O288 84.7 (11) . . ?  
O297 W81 O288 86.5 (12) . . ?  
O265 W82 O272 109.0 (17) . . ?  
O265 W82 O268 91.9 (15) . . ?  
O272 W82 O268 117.6 (17) . . ?  
O265 W82 O271 169.6 (14) . . ?  
O272 W82 O271 81.4 (16) . . ?  
O268 W82 O271 84.0 (14) . . ?  
O265 W82 O267 87 (2) . . ?  
O272 W82 O267 153 (2) . . ?  
O268 W82 O267 82 (2) . . ?  
O271 W82 O267 83 (2) . . ?

\_diffn\_measured\_fraction\_theta\_max 0.999  
\_diffn\_reflns\_theta\_full 24.11  
\_diffn\_measured\_fraction\_theta\_full 0.999  
\_refine\_diff\_density\_max 6.770  
\_refine\_diff\_density\_min -4.527  
\_refine\_diff\_density\_rms 0.513

data\_fh109

```
_audit_creation_method          SHELXL-97
_chemical_name_systematic
;
?
;
_chemical_name_common           ?
_chemical_melting_point         ?
_chemical_formula_moiety        ?
_chemical_formula_sum
'As16 Cs6 Eu16 K2 Na36 O772 W163.60'
_chemical_formula_weight        47763.24

loop_
  _atom_type_symbol
  _atom_type_description
  _atom_type_scatter_dispersion_real
  _atom_type_scatter_dispersion_imag
  _atom_type_scatter_source
'O' 'O' 0.0106 0.0060
'International Tables Vol C Tables 4.2.6.8 and 6.1.1.4'
'Na' 'Na' 0.0362 0.0249
'International Tables Vol C Tables 4.2.6.8 and 6.1.1.4'
'K' 'K' 0.2009 0.2494
'International Tables Vol C Tables 4.2.6.8 and 6.1.1.4'
'As' 'As' 0.0499 2.0058
'International Tables Vol C Tables 4.2.6.8 and 6.1.1.4'
'Cs' 'Cs' -0.3680 2.1192
'International Tables Vol C Tables 4.2.6.8 and 6.1.1.4'
'Eu' 'Eu' -0.1578 3.6682
'International Tables Vol C Tables 4.2.6.8 and 6.1.1.4'
'W' 'W' -0.8490 6.8722
'International Tables Vol C Tables 4.2.6.8 and 6.1.1.4'

_symmetry_space_group_name_H-M 'P -1'
_symmetry_cell_setting triclinic

loop_
  _symmetry_equiv_pos_as_xyz
  'x, y, z'
  '-x, -y, -z'

_cell_length_a 20.9150(2)
_cell_length_b 23.1730(2)
_cell_length_c 44.9473(3)
_cell_angle_alpha 81.5060(10)
_cell_angle_beta 83.8550(10)
_cell_angle_gamma 82.9050(10)
_cell_volume 21292.7(3)
_cell_formula_units_Z 1
_cell_measurement_temperature 183(2)
_cell_measurement_reflns_used 82564
_cell_measurement_theta_min 2.2091
_cell_measurement_theta_max 29.4439

_exptl_crystal_description block
_exptl_crystal_colour colorless
_exptl_crystal_size_max 0.11
_exptl_crystal_size_mid 0.10
_exptl_crystal_size_min 0.04
_exptl_crystal_density_meas ?
_exptl_crystal_density_diffrn 3.725
```



```
_exptl_crystal_density_method      'not measured'
_exptl_crystal_F_000               20582
_exptl_absorpt_coefficient_mu      24.150
_exptl_absorpt_correction_type     'multi-scan'
_exptl_absorpt_correction_T_min    0.27501
_exptl_absorpt_correction_T_max    1.00000
_exptl_absorpt_process_details
;
CrysAlisPro, Oxford Diffraction Ltd.,
Version 1.171.33.34d (release 27-02-2009 CrysAlis171 .NET)
(compiled Feb 27 2009,15:38:38)
Empirical absorption correction using spherical harmonics,
implemented in SCALE3 ABSPACK scaling algorithm.
;
_exptl_special_details
;
?
;

_diffrn_ambient_temperature        183(2)
_diffrn_radiation_wavelength       0.71073
_diffrn_radiation_type             MoK\alpha
_diffrn_radiation_source           'fine-focus sealed tube'
_diffrn_radiation_monochromator     graphite
_diffrn_measurement_device_type     'Xcalibur Ruby'
_diffrn_measurement_method         '/o oscillation scan'
_diffrn_detector_area_resol_mean   10.4498
_diffrn_standards_number           ?
_diffrn_standards_interval_count   ?
_diffrn_standards_interval_time    ?
_diffrn_standards_decay_%         ?
_diffrn_reflns_number              338442
_diffrn_reflns_av_R_equivalents    0.0935
_diffrn_reflns_av_sigmaI/netI     0.1395
_diffrn_reflns_limit_h_min         -25
_diffrn_reflns_limit_h_max         25
_diffrn_reflns_limit_k_min         -28
_diffrn_reflns_limit_k_max         28
_diffrn_reflns_limit_l_min         -54
_diffrn_reflns_limit_l_max         54
_diffrn_reflns_theta_min           2.22
_diffrn_reflns_theta_max           25.68
_reflns_number_total               80845
_reflns_number_gt                  45899
_reflns_threshold_expression       >2sigma(I)

_computing_data_collection         'CrysAlis RED (Oxford, 2007)'
_computing_cell_refinement         'CrysAlis RED (Oxford, 2007)'
_computing_data_reduction         'CrysAlis RED (Oxford, 2007)'
_computing_structure_solution     'SHELXS-97 (Sheldrick, 1990)'
_computing_structure_refinement   'SHELXL-97 (Sheldrick, 1997)'
_computing_molecular_graphics     'ORTEP-3 (Farrugia, 1997)'
_computing_publication_material   'SHELXL-97 (Sheldrick, 2008)'

_refine_special_details
;
Refinement of F2 against ALL reflections. The weighted R-factor
wR and
goodness of fit S are based on F2, conventional R-factors R are
based
on F, with F set to zero for negative F2. The threshold expression
of
F2 > 2sigma(F2) is used only for calculating R-factors(gt) etc.
and is
```

not relevant to the choice of reflections for refinement. R-factors based

on  $F^2$  are statistically about twice as large as those based on  $F$ , and R-

factors based on ALL data will be even larger.

;

```
_refine_ls_structure_factor_coef  Fsqd
_refine_ls_matrix_type            full
_refine_ls_weighting_scheme       calc
_refine_ls_weighting_details      'calc w=1/[\s^2^(Fo^2^)+(0.1035P)^2^+0.0000P] where P=(Fo^2^+2Fc^2
^)/3'
_atom_sites_solution_primary      direct
_atom_sites_solution_secondary    difmap
_refine_ls_extinction_method      none
_refine_ls_extinction_coef        ?
_refine_ls_number_reflns         80845
_refine_ls_number_parameters      2544
_refine_ls_number_restraints      0
_refine_ls_R_factor_all          0.1374
_refine_ls_R_factor_gt           0.0744
_refine_ls_wR_factor_ref         0.2028
_refine_ls_wR_factor_gt          0.1846
_refine_ls_goodness_of_fit_ref    1.008
_refine_ls_restrained_S_all       1.008
_refine_ls_shift/su_max           0.091
_refine_ls_shift/su_mean          0.001
```

loop\_

```
_atom_site_label
_atom_site_type_symbol
_atom_site_fract_x
_atom_site_fract_y
_atom_site_fract_z
_atom_site_U_iso_or_equiv
_atom_site_adp_type
_atom_site_occupancy
_atom_site_symmetry_multiplicity
_atom_site_calc_flag
_atom_site_refinement_flags
_atom_site_disorder_assembly
_atom_site_disorder_group
O1 O 0.6574(12) 0.1846(9) 0.0780(5) 0.053(6) Uiso 1 1 d . . . .
O2 O 0.7348(14) 0.0227(11) 0.1472(6) 0.071(8) Uiso 1 1 d . . . .
O3 O 0.5916(13) 0.1895(10) 0.1860(5) 0.061(7) Uiso 1 1 d . . . .
O4 O 0.4163(11) 0.0363(9) 0.2437(5) 0.047(6) Uiso 1 1 d . . . .
O5 O 0.5711(11) -0.1275(9) 0.2114(5) 0.048(6) Uiso 1 1 d . . . .
O6 O 0.6303(10) -0.1321(8) 0.0888(4) 0.039(5) Uiso 1 1 d . . . .
O7 O 0.5527(10) 0.0337(8) 0.0157(4) 0.037(5) Uiso 1 1 d . . . .
O8 O 0.4057(11) 0.2315(9) 0.0520(5) 0.046(6) Uiso 1 1 d . . . .
O9 O 0.3363(10) 0.2241(8) 0.1594(4) 0.038(5) Uiso 1 1 d . . . .
O10 O 0.6409(10) 0.0739(8) 0.1097(4) 0.037(5) Uiso 1 1 d . . . .
O11 O 0.6117(11) 0.0770(9) 0.1666(5) 0.047(6) Uiso 1 1 d . . . .
O12 O 0.5679(10) 0.1634(8) 0.1280(4) 0.035(5) Uiso 1 1 d . . . .
O13 O 0.5998(11) 0.1001(8) 0.0550(4) 0.041(5) Uiso 1 1 d . . . .
O14 O 0.6680(11) -0.0411(9) 0.1162(5) 0.043(5) Uiso 1 1 d . . . .
O15 O 0.6325(11) -0.0387(8) 0.1761(4) 0.041(5) Uiso 1 1 d . . . .
O16 O 0.5104(10) 0.1044(8) 0.2059(4) 0.038(5) Uiso 1 1 d . . . .
O17 O 0.4686(11) 0.1919(8) 0.1670(4) 0.040(5) Uiso 1 1 d . . . .
O18 O 0.5223(11) 0.1917(8) 0.0731(4) 0.041(5) Uiso 1 1 d . . . .
O19 O 0.4771(10) 0.1244(8) 0.0421(4) 0.034(5) Uiso 1 1 d . . . .
O20 O 0.5834(11) -0.0108(9) 0.0750(5) 0.048(6) Uiso 1 1 d . . . .
O21 O 0.5898(9) -0.1141(7) 0.1476(4) 0.028(4) Uiso 1 1 d . . . .
```

O22 O 0.5133(11) -0.0085(8) 0.2004(4) 0.040(5) Uiso 1 1 d . . . .  
O23 O 0.3837(10) 0.1211(8) 0.1938(4) 0.038(5) Uiso 1 1 d . . . .  
O24 O 0.4266(9) 0.1874(7) 0.1134(4) 0.025(4) Uiso 1 1 d . . . .  
O25 O 0.4750(12) 0.0872(9) 0.1560(5) 0.049(6) Uiso 1 1 d . . . .  
O26 O 0.5507(10) -0.0063(8) 0.1369(4) 0.036(5) Uiso 1 1 d . . . .  
O27 O 0.5062(10) 0.0876(8) 0.0962(4) 0.032(5) Uiso 1 1 d . . . .  
O28 O 0.4601(10) 0.0097(8) 0.0648(4) 0.035(5) Uiso 1 1 d . . . .  
O29 O 0.5050(10) -0.0878(8) 0.1051(4) 0.036(5) Uiso 1 1 d . . . .  
O30 O 0.4695(11) -0.0927(9) 0.1738(5) 0.043(5) Uiso 1 1 d . . . .  
O31 O 0.3853(11) 0.0049(8) 0.1910(4) 0.043(5) Uiso 1 1 d . . . .  
O32 O 0.3507(9) 0.1119(7) 0.1403(4) 0.029(4) Uiso 1 1 d . . . .  
O33 O 0.3688(10) 0.1279(7) 0.0826(4) 0.030(5) Uiso 1 1 d . . . .  
O34 O 0.3467(9) 0.0161(7) 0.1066(4) 0.028(4) Uiso 1 1 d . . . .  
O35 O 0.2400(10) 0.0610(8) 0.1387(4) 0.031(5) Uiso 1 1 d . . . .  
O36 O 0.3433(10) -0.0337(8) 0.0418(4) 0.037(5) Uiso 1 1 d . . . .  
O37 O 0.3827(13) -0.0969(10) 0.1421(5) 0.063(7) Uiso 1 1 d . . . .  
O38 O 0.4650(12) -0.1043(9) 0.0431(5) 0.051(6) Uiso 1 1 d . . . .  
O39 O 0.2496(10) 0.1695(8) 0.1101(4) 0.031(5) Uiso 1 1 d . . . .  
O40 O 0.2591(9) 0.0908(7) 0.0758(4) 0.021(4) Uiso 1 1 d . . . .  
O41 O 0.2146(9) 0.1969(7) 0.0555(4) 0.027(4) Uiso 1 1 d . . . .  
O42 O 0.1402(10) 0.2361(8) 0.1301(4) 0.035(5) Uiso 1 1 d . . . .  
O43 O 0.0047(10) 0.1365(8) 0.1420(4) 0.032(5) Uiso 1 1 d . . . .  
O44 O -0.0210(10) -0.0139(8) 0.1254(4) 0.032(5) Uiso 1 1 d . . . .  
O45 O 0.0817(9) -0.0113(7) 0.0514(4) 0.021(4) Uiso 1 1 d . . . .  
O46 O 0.2415(9) 0.0493(7) 0.0249(4) 0.020(4) Uiso 1 1 d . . . .  
O47 O 0.1411(9) 0.0949(7) 0.0553(4) 0.026(4) Uiso 1 1 d . . . .  
O48 O 0.1070(9) 0.1630(7) 0.0985(4) 0.028(4) Uiso 1 1 d . . . .  
O49 O 0.0443(10) 0.0664(8) 0.0960(4) 0.036(5) Uiso 1 1 d . . . .  
O50 O 0.2371(11) 0.2876(9) 0.0901(5) 0.048(6) Uiso 1 1 d . . . .  
O51 O 0.0383(11) 0.2206(9) 0.1768(5) 0.046(6) Uiso 1 1 d . . . .  
O52 O 0.1239(10) 0.1258(8) 0.1606(4) 0.039(5) Uiso 1 1 d . . . .  
O53 O 0.0631(9) 0.0262(7) 0.1593(4) 0.028(4) Uiso 1 1 d . . . .  
O54 O -0.0710(12) 0.0495(10) 0.1733(5) 0.058(7) Uiso 1 1 d . . . .  
O55 O 0.0998(9) -0.0597(7) 0.1071(4) 0.026(4) Uiso 1 1 d . . . .  
O56 O -0.0019(12) -0.0911(10) 0.0809(5) 0.055(6) Uiso 1 1 d . . . .  
O57 O 0.1966(9) -0.0209(7) 0.0736(4) 0.020(4) Uiso 1 1 d . . . .  
O58 O 0.1877(10) -0.0485(8) 0.0138(4) 0.035(5) Uiso 1 1 d . . . .  
O59 O 0.3145(10) 0.1451(8) 0.0197(4) 0.037(5) Uiso 1 1 d . . . .  
O60 O 0.1826(10) 0.1564(7) 0.0072(4) 0.029(5) Uiso 1 1 d . . . .  
O61 O 0.1181(10) 0.2680(8) 0.0730(4) 0.039(5) Uiso 1 1 d . . . .  
O62 O 0.0168(11) 0.2439(8) 0.1141(4) 0.041(5) Uiso 1 1 d . . . .  
O63 O -0.0778(11) 0.0949(9) 0.1116(5) 0.048(6) Uiso 1 1 d . . . .  
O64 O -0.0411(12) 0.0269(9) 0.0677(5) 0.051(6) Uiso 1 1 d . . . .  
O65 O 0.1233(9) 0.0639(7) 0.0045(4) 0.025(4) Uiso 1 1 d . . . .  
O66 O 0.0161(10) 0.1156(8) 0.0340(4) 0.031(5) Uiso 1 1 d . . . .  
O67 O -0.0199(11) 0.1807(9) 0.0746(5) 0.045(6) Uiso 1 1 d . . . .  
O68 O 0.0740(9) 0.2074(7) 0.0365(4) 0.025(4) Uiso 1 1 d . . . .  
O69 O -0.1173(12) 0.1321(9) 0.0539(5) 0.050(6) Uiso 1 1 d . . . .  
O70 O 0.0658(10) 0.1748(8) -0.0193(4) 0.034(5) Uiso 1 1 d . . . .  
O71 O -0.0086(13) 0.3011(10) 0.0580(5) 0.061(7) Uiso 1 1 d . . . .  
O72 O 0.2848(9) -0.0878(7) 0.1032(4) 0.024(4) Uiso 1 1 d . . . .  
O73 O 0.1888(9) -0.0361(7) 0.1392(4) 0.026(4) Uiso 1 1 d . . . .  
O74 O 0.1080(10) 0.0611(8) 0.2197(4) 0.033(5) Uiso 1 1 d . . . .  
O75 O 0.2398(12) 0.0835(9) 0.1975(5) 0.053(6) Uiso 1 1 d . . . .  
O76 O 0.2686(12) -0.0369(9) 0.1897(5) 0.054(6) Uiso 1 1 d . . . .  
O77 O 0.3891(10) -0.1682(8) 0.0885(4) 0.031(5) Uiso 1 1 d . . . .  
O78 O 0.3206(9) -0.2421(7) 0.0585(4) 0.021(4) Uiso 1 1 d . . . .  
O79 O 0.2220(10) -0.1936(8) 0.0223(4) 0.030(5) Uiso 1 1 d . . . .  
O80 O 0.2000(8) -0.2568(6) 0.0800(3) 0.016(4) Uiso 1 1 d . . . .  
O81 O 0.1829(10) -0.3048(8) 0.0325(4) 0.034(5) Uiso 1 1 d . . . .  
O82 O 0.1509(9) -0.3768(7) 0.0820(4) 0.027(4) Uiso 1 1 d . . . .  
O83 O 0.1286(10) -0.4056(8) 0.0244(4) 0.033(5) Uiso 1 1 d . . . .  
O84 O 0.2205(9) -0.4677(7) 0.0619(4) 0.024(4) Uiso 1 1 d . . . .  
O85 O 0.1647(9) -0.4740(7) 0.1173(4) 0.028(4) Uiso 1 1 d . . . .

O86 O 0.2018(11) -0.5790(9) 0.0962(5) 0.047(6) Uiso 1 1 d . . . .  
O87 O 0.2736(9) -0.5389(7) 0.1379(4) 0.028(4) Uiso 1 1 d . . . .  
O88 O 0.2672(9) -0.4405(7) 0.1677(4) 0.025(4) Uiso 1 1 d . . . .  
O89 O 0.3552(9) -0.5373(7) 0.1819(4) 0.026(4) Uiso 1 1 d . . . .  
O90 O 0.3898(9) -0.4307(7) 0.1490(4) 0.019(4) Uiso 1 1 d . . . .  
O91 O 0.3136(9) -0.3339(7) 0.1646(4) 0.020(4) Uiso 1 1 d . . . .  
O92 O 0.4418(11) -0.3481(8) 0.1791(4) 0.040(5) Uiso 1 1 d . . . .  
O93 O 0.3997(9) -0.2669(7) 0.1317(4) 0.020(4) Uiso 1 1 d . . . .  
O94 O 0.4411(9) -0.2750(7) 0.0731(4) 0.025(4) Uiso 1 1 d . . . .  
O95 O 0.3063(10) -0.2921(8) 0.0110(4) 0.034(5) Uiso 1 1 d . . . .  
O96 O 0.2627(9) -0.3945(7) 0.0128(4) 0.022(4) Uiso 1 1 d . . . .  
O97 O 0.3213(9) -0.5410(7) 0.0787(4) 0.022(4) Uiso 1 1 d . . . .  
O98 O 0.4002(10) -0.5231(8) 0.1203(4) 0.036(5) Uiso 1 1 d . . . .  
O99 O 0.4730(9) -0.3612(7) 0.1174(4) 0.024(4) Uiso 1 1 d . . . .  
O100 O 0.3080(10) -0.4434(7) 0.1053(4) 0.029(5) Uiso 1 1 d . . . .  
O101 O 0.2785(9) -0.3565(7) 0.0618(4) 0.025(4) Uiso 1 1 d . . . .  
O102 O 0.3580(8) -0.3376(6) 0.1030(3) 0.017(4) Uiso 1 1 d . . . .  
O103 O 0.3642(10) -0.4519(8) 0.0421(4) 0.033(5) Uiso 1 1 d . . . .  
O104 O 0.4094(10) -0.3482(8) 0.0389(4) 0.030(5) Uiso 1 1 d . . . .  
O105 O 0.4402(10) -0.4351(7) 0.0808(4) 0.029(5) Uiso 1 1 d . . . .  
O106 O 0.4517(10) -0.5483(8) 0.0638(4) 0.033(5) Uiso 1 1 d . . . .  
O107 O 0.3869(10) -0.3830(8) -0.0140(4) 0.039(5) Uiso 1 1 d . . . .  
O108 O 0.5387(10) -0.3604(8) 0.0606(4) 0.038(5) Uiso 1 1 d . . . .  
O109 O 0.1835(9) -0.1486(7) 0.1340(4) 0.020(4) Uiso 1 1 d . . . .  
O110 O 0.1891(9) -0.1403(7) 0.0806(4) 0.019(4) Uiso 1 1 d . . . .  
O111 O 0.1834(9) -0.2698(7) 0.1460(4) 0.020(4) Uiso 1 1 d . . . .  
O112 O 0.2524(10) -0.3987(8) 0.2282(4) 0.033(5) Uiso 1 1 d . . . .  
O113 O 0.2171(9) -0.2787(7) 0.2154(4) 0.028(4) Uiso 1 1 d . . . .  
O114 O 0.1522(9) -0.3778(7) 0.1438(4) 0.028(4) Uiso 1 1 d . . . .  
O115 O 0.0981(9) -0.3223(7) 0.2043(4) 0.023(4) Uiso 1 1 d . . . .  
O116 O -0.0395(10) -0.1566(8) 0.1413(4) 0.033(5) Uiso 1 1 d . . . .  
O117 O 0.0478(10) -0.3322(7) 0.1157(4) 0.029(5) Uiso 1 1 d . . . .  
O118 O 0.0096(9) -0.2787(7) 0.1645(4) 0.027(4) Uiso 1 1 d . . . .  
O119 O -0.0082(10) -0.5151(8) 0.1235(4) 0.032(5) Uiso 1 1 d . . . .  
O120 O 0.0925(9) -0.2105(7) 0.1128(4) 0.026(4) Uiso 1 1 d . . . .  
O121 O 0.0516(10) -0.2484(7) 0.0631(4) 0.029(5) Uiso 1 1 d . . . .  
O122 O -0.0832(10) -0.1716(8) 0.0806(4) 0.034(5) Uiso 1 1 d . . . .  
O123 O -0.1183(10) -0.2517(8) 0.1374(4) 0.037(5) Uiso 1 1 d . . . .  
O124 O -0.0665(10) -0.3019(8) 0.0880(4) 0.038(5) Uiso 1 1 d . . . .  
O125 O 0.0444(10) -0.4289(8) 0.0910(4) 0.032(5) Uiso 1 1 d . . . .  
O126 O 0.0537(9) -0.4473(7) 0.1500(4) 0.021(4) Uiso 1 1 d . . . .  
O127 O -0.0015(9) -0.3854(7) 0.2047(4) 0.022(4) Uiso 1 1 d . . . .  
O128 O -0.0861(9) -0.2941(7) 0.2046(4) 0.026(4) Uiso 1 1 d . . . .  
O129 O -0.1904(10) -0.2973(8) 0.2500(4) 0.031(5) Uiso 1 1 d . . . .  
O130 O -0.1196(9) -0.3985(7) 0.2264(4) 0.029(4) Uiso 1 1 d . . . .  
O131 O -0.0170(9) -0.4631(7) 0.2580(4) 0.026(4) Uiso 1 1 d . . . .  
O132 O 0.0242(9) -0.4994(7) 0.2029(4) 0.024(4) Uiso 1 1 d . . . .  
O133 O 0.0830(11) -0.5727(9) 0.1613(5) 0.047(6) Uiso 1 1 d . . . .  
O134 O -0.1586(11) 0.0128(8) 0.3438(4) 0.042(5) Uiso 1 1 d . . . .  
O135 O 0.0111(11) -0.5089(9) 0.0580(5) 0.045(6) Uiso 1 1 d . . . .  
O136 O -0.0650(10) -0.4010(8) 0.0616(4) 0.032(5) Uiso 1 1 d . . . .  
O137 O -0.1548(11) -0.3041(9) 0.0460(5) 0.046(6) Uiso 1 1 d . . . .  
O138 O -0.1912(10) -0.3065(8) 0.1083(4) 0.034(5) Uiso 1 1 d . . . .  
O139 O -0.2463(11) -0.2058(9) 0.1324(5) 0.043(5) Uiso 1 1 d . . . .  
O140 O -0.2055(9) -0.2607(7) 0.1870(4) 0.028(4) Uiso 1 1 d . . . .  
O141 O -0.1576(9) -0.3579(7) 0.1670(4) 0.026(4) Uiso 1 1 d . . . .  
O142 O -0.0713(10) -0.4546(7) 0.1754(4) 0.029(5) Uiso 1 1 d . . . .  
O143 O -0.1015(10) -0.4104(8) 0.1176(4) 0.034(5) Uiso 1 1 d . . . .  
O144 O -0.1062(11) -0.5012(8) 0.0905(4) 0.040(5) Uiso 1 1 d . . . .  
O145 O -0.1920(11) -0.4051(8) 0.0844(4) 0.042(5) Uiso 1 1 d . . . .  
O146 O -0.2727(10) -0.3202(8) 0.1561(4) 0.032(5) Uiso 1 1 d . . . .  
O147 O -0.2401(10) -0.3688(8) 0.2143(4) 0.037(5) Uiso 1 1 d . . . .  
O148 O -0.0982(9) -0.5114(7) 0.2256(4) 0.029(4) Uiso 1 1 d . . . .  
O149 O -0.0490(10) -0.5650(8) 0.1779(4) 0.035(5) Uiso 1 1 d . . . .

O150 O -0.1517(10) -0.5207(8) 0.1496(4) 0.032(5) Uiso 1 1 d . . . .  
O151 O -0.2345(11) -0.4275(8) 0.1416(4) 0.042(5) Uiso 1 1 d . . . .  
O152 O -0.2027(11) -0.4683(9) 0.1957(5) 0.043(5) Uiso 1 1 d . . . .  
O153 O -0.1722(11) -0.5897(9) 0.2043(4) 0.043(5) Uiso 1 1 d . . . .  
O154 O -0.3315(11) -0.4162(9) 0.1870(5) 0.049(6) Uiso 1 1 d . . . .  
O155 O -0.2333(13) -0.5124(10) 0.1032(5) 0.062(7) Uiso 1 1 d . . . .  
O156 O 0.1427(10) -0.4405(8) 0.2041(4) 0.034(5) Uiso 1 1 d . . . .  
O157 O 0.2802(9) -0.2209(7) 0.1130(4) 0.023(4) Uiso 1 1 d . . . .  
O158 O 0.1322(10) -0.0609(7) 0.2069(4) 0.030(5) Uiso 1 1 d . . . .  
O159 O 0.0643(10) -0.1367(8) 0.2482(4) 0.034(5) Uiso 1 1 d . . . .  
O160 O 0.1898(9) -0.1692(7) 0.2394(4) 0.024(4) Uiso 1 1 d . . . .  
O161 O 0.1128(9) -0.2532(7) 0.2570(4) 0.028(4) Uiso 1 1 d . . . .  
O162 O 0.2163(9) -0.3282(7) 0.2751(4) 0.023(4) Uiso 1 1 d . . . .  
O163 O 0.1254(10) -0.3352(8) 0.3212(4) 0.032(5) Uiso 1 1 d . . . .  
O164 O 0.2433(11) -0.4059(9) 0.3300(5) 0.045(6) Uiso 1 1 d . . . .  
O165 O 0.2026(11) -0.3026(8) 0.3547(4) 0.041(5) Uiso 1 1 d . . . .  
O166 O 0.0760(10) -0.2771(8) 0.3636(4) 0.036(5) Uiso 1 1 d . . . .  
O167 O 0.1440(12) -0.3128(10) 0.4150(5) 0.059(7) Uiso 1 1 d . . . .  
O168 O 0.0961(11) -0.1977(9) 0.3997(5) 0.046(6) Uiso 1 1 d . . . .  
O169 O -0.0406(10) -0.3128(7) 0.3683(4) 0.030(5) Uiso 1 1 d . . . .  
O170 O 0.0981(11) -0.0563(9) 0.3447(5) 0.047(6) Uiso 1 1 d . . . .  
O171 O 0.0059(10) -0.0584(8) 0.3132(4) 0.034(5) Uiso 1 1 d . . . .  
O172 O 0.0533(10) 0.0478(8) 0.3061(4) 0.039(5) Uiso 1 1 d . . . .  
O173 O 0.0863(9) -0.0308(7) 0.2616(4) 0.025(4) Uiso 1 1 d . . . .  
O174 O 0.1532(10) -0.1800(8) 0.3474(4) 0.033(5) Uiso 1 1 d . . . .  
O175 O 0.1971(9) -0.2334(7) 0.2976(4) 0.029(4) Uiso 1 1 d . . . .  
O176 O 0.1453(9) -0.1176(7) 0.2915(4) 0.025(4) Uiso 1 1 d . . . .  
O177 O 0.1679(9) -0.0120(7) 0.2993(4) 0.029(5) Uiso 1 1 d . . . .  
O178 O 0.2138(9) -0.0638(7) 0.2499(4) 0.026(4) Uiso 1 1 d . . . .  
O179 O 0.2891(10) -0.2393(7) 0.2560(4) 0.030(5) Uiso 1 1 d . . . .  
O180 O 0.2965(10) -0.3017(7) 0.3112(4) 0.030(5) Uiso 1 1 d . . . .  
O181 O 0.2229(11) -0.2267(9) 0.3900(5) 0.048(6) Uiso 1 1 d . . . .  
O182 O 0.1708(12) -0.1135(9) 0.3840(5) 0.049(6) Uiso 1 1 d . . . .  
O183 O 0.2919(10) -0.2066(8) 0.3359(4) 0.036(5) Uiso 1 1 d . . . .  
O184 O 0.2842(10) -0.1431(8) 0.2837(4) 0.031(5) Uiso 1 1 d . . . .  
O185 O 0.2444(10) -0.0969(8) 0.3313(4) 0.034(5) Uiso 1 1 d . . . .  
O186 O 0.3096(13) -0.1428(11) 0.3808(6) 0.068(7) Uiso 1 1 d . . . .  
O187 O 0.3900(11) -0.2276(8) 0.2879(5) 0.043(5) Uiso 1 1 d . . . .  
O188 O 0.3035(11) -0.0258(9) 0.2835(5) 0.048(6) Uiso 1 1 d . . . .  
O189 O -0.0751(10) -0.1311(8) 0.2438(4) 0.036(5) Uiso 1 1 d . . . .  
O190 O 0.0080(9) -0.2815(7) 0.3109(4) 0.027(4) Uiso 1 1 d . . . .  
O191 O -0.1130(10) -0.2352(8) 0.2765(4) 0.039(5) Uiso 1 1 d . . . .  
O192 O -0.0042(9) -0.3129(7) 0.2478(4) 0.020(4) Uiso 1 1 d . . . .  
O193 O -0.0214(10) -0.1602(8) 0.3022(4) 0.033(5) Uiso 1 1 d . . . .  
O194 O 0.0118(9) -0.2222(7) 0.2117(4) 0.023(4) Uiso 1 1 d . . . .  
O195 O -0.0929(10) -0.1845(8) 0.3545(4) 0.034(5) Uiso 1 1 d . . . .  
O196 O 0.0261(10) -0.1430(8) 0.3568(4) 0.039(5) Uiso 1 1 d . . . .  
O197 O -0.1201(10) -0.0767(8) 0.3143(4) 0.033(5) Uiso 1 1 d . . . .  
O198 O -0.0821(11) -0.0779(9) 0.3695(5) 0.046(6) Uiso 1 1 d . . . .  
O199 O -0.0859(12) 0.0267(10) 0.3923(5) 0.055(6) Uiso 1 1 d . . . .  
O200 O -0.1504(11) -0.0662(9) 0.4214(5) 0.045(6) Uiso 1 1 d . . . .  
O201 O -0.1656(11) -0.1763(9) 0.4119(5) 0.048(6) Uiso 1 1 d . . . .  
O202 O -0.2115(13) -0.1421(10) 0.4687(5) 0.059(7) Uiso 1 1 d . . . .  
O203 O -0.2873(13) -0.1516(10) 0.4247(5) 0.060(7) Uiso 1 1 d . . . .  
O204 O -0.2486(11) -0.2412(8) 0.3896(4) 0.040(5) Uiso 1 1 d . . . .  
O205 O -0.3590(14) -0.2587(11) 0.4288(6) 0.069(7) Uiso 1 1 d . . . .  
O206 O -0.3621(13) -0.2316(10) 0.3680(5) 0.065(7) Uiso 1 1 d . . . .  
O207 O -0.3897(15) -0.2189(12) 0.3103(6) 0.084(9) Uiso 1 1 d . . . .  
O208 O -0.2715(11) -0.2283(9) 0.3210(5) 0.048(6) Uiso 1 1 d . . . .  
O209 O -0.3288(12) -0.1220(9) 0.2944(5) 0.052(6) Uiso 1 1 d . . . .  
O210 O -0.2714(12) -0.0797(10) 0.2370(5) 0.056(6) Uiso 1 1 d . . . .  
O211 O -0.1995(12) -0.1471(10) 0.2813(5) 0.056(6) Uiso 1 1 d . . . .  
O212 O -0.1902(11) -0.0298(9) 0.2699(5) 0.047(6) Uiso 1 1 d . . . .  
O213 O -0.1050(11) 0.0418(9) 0.2850(5) 0.047(6) Uiso 1 1 d . . . .

O214 O -0.2466(10) -0.0573(8) 0.3218(4) 0.035(5) Uiso 1 1 d . . . .  
O215 O -0.2306(11) -0.0742(8) 0.3813(4) 0.041(5) Uiso 1 1 d . . . .  
O216 O -0.3121(12) -0.1377(9) 0.3594(5) 0.050(6) Uiso 1 1 d . . . .  
O217 O -0.4247(13) -0.1304(10) 0.3420(5) 0.064(7) Uiso 1 1 d . . . .  
O218 O -0.3181(12) -0.0086(10) 0.2794(5) 0.056(6) Uiso 1 1 d . . . .  
O219 O -0.2378(10) 0.0542(8) 0.3028(4) 0.039(5) Uiso 1 1 d . . . .  
O220 O -0.2184(12) 0.0301(9) 0.3973(5) 0.054(6) Uiso 1 1 d . . . .  
O221 O -0.2825(14) -0.0492(11) 0.4333(6) 0.071(8) Uiso 1 1 d . . . .  
O222 O -0.4062(12) -0.1471(9) 0.4007(5) 0.050(6) Uiso 1 1 d . . . .  
O223 O -0.3650(14) -0.0391(11) 0.3918(6) 0.069(7) Uiso 1 1 d . . . .  
O224 O -0.3085(13) 0.0335(10) 0.3560(6) 0.066(7) Uiso 1 1 d . . . .  
O225 O -0.3894(12) -0.0233(10) 0.3363(5) 0.059(7) Uiso 1 1 d . . . .  
O226 O -0.3732(12) 0.0886(10) 0.3081(5) 0.056(6) Uiso 1 1 d . . . .  
O227 O -0.3464(13) 0.0605(10) 0.4148(5) 0.066(7) Uiso 1 1 d . . . .  
O228 O -0.4926(14) -0.0566(11) 0.3774(6) 0.074(8) Uiso 1 1 d . . . .  
O229 O -0.1611(11) -0.2710(9) 0.3368(5) 0.045(6) Uiso 1 1 d . . . .  
O230 O -0.1400(13) -0.3059(10) 0.4406(5) 0.062(7) Uiso 1 1 d . . . .  
O231 O -0.1564(10) -0.3598(8) 0.3913(4) 0.036(5) Uiso 1 1 d . . . .  
O232 O -0.0354(12) -0.2403(9) 0.4104(5) 0.050(6) Uiso 1 1 d . . . .  
O233 O -0.0206(10) -0.5131(8) 0.3510(4) 0.032(5) Uiso 1 1 d . . . .  
O234 O -0.0423(9) -0.4377(7) 0.3911(4) 0.026(4) Uiso 1 1 d . . . .  
O235 O -0.1182(10) -0.4254(8) 0.4425(4) 0.031(5) Uiso 1 1 d . . . .  
O236 O -0.0156(10) -0.5024(8) 0.4588(4) 0.031(5) Uiso 1 1 d . . . .  
O237 O -0.1034(11) -0.4616(8) 0.5045(4) 0.043(5) Uiso 1 1 d . . . .  
O238 O -0.0965(11) -0.5765(8) 0.4893(4) 0.039(5) Uiso 1 1 d . . . .  
O239 O 0.0210(11) -0.6208(9) 0.4726(5) 0.044(5) Uiso 1 1 d . . . .  
O240 O -0.0363(12) -0.6748(9) 0.5261(5) 0.053(6) Uiso 1 1 d . . . .  
O241 O -0.0254(11) -0.7296(9) 0.4756(5) 0.044(5) Uiso 1 1 d . . . .  
O242 O 0.0446(10) -0.7263(8) 0.4195(4) 0.035(5) Uiso 1 1 d . . . .  
O243 O -0.0163(14) -0.8231(11) 0.4388(6) 0.069(7) Uiso 1 1 d . . . .  
O244 O -0.0655(11) -0.7271(9) 0.3979(5) 0.046(6) Uiso 1 1 d . . . .  
O245 O 0.0172(11) -0.6544(9) 0.3725(5) 0.047(6) Uiso 1 1 d . . . .  
O246 O -0.0363(12) -0.7212(10) 0.3342(5) 0.056(6) Uiso 1 1 d . . . .  
O247 O -0.0625(11) -0.6024(8) 0.3304(4) 0.042(5) Uiso 1 1 d . . . .  
O248 O -0.1133(11) -0.4880(8) 0.3084(4) 0.042(5) Uiso 1 1 d . . . .  
O249 O -0.2201(11) -0.4539(9) 0.4177(5) 0.045(6) Uiso 1 1 d . . . .  
O250 O -0.1980(11) -0.4972(9) 0.4746(5) 0.047(6) Uiso 1 1 d . . . .  
O251 O -0.1416(13) -0.6783(10) 0.4931(5) 0.061(7) Uiso 1 1 d . . . .  
O252 O -0.1243(12) -0.7513(9) 0.4500(5) 0.053(6) Uiso 1 1 d . . . .  
O253 O -0.1510(12) -0.6743(9) 0.3616(5) 0.052(6) Uiso 1 1 d . . . .  
O254 O -0.1830(12) -0.5619(9) 0.3473(5) 0.051(6) Uiso 1 1 d . . . .  
O255 O -0.2389(12) -0.5580(10) 0.4049(5) 0.056(6) Uiso 1 1 d . . . .  
O256 O -0.2118(11) -0.6053(8) 0.4595(4) 0.041(5) Uiso 1 1 d . . . .  
O257 O -0.2020(12) -0.6668(9) 0.4169(5) 0.053(6) Uiso 1 1 d . . . .  
O258 O -0.2469(13) -0.7170(11) 0.4760(6) 0.068(7) Uiso 1 1 d . . . .  
O259 O -0.3152(14) -0.5088(11) 0.4544(6) 0.071(8) Uiso 1 1 d . . . .  
O260 O -0.2783(13) -0.6313(10) 0.3717(5) 0.061(7) Uiso 1 1 d . . . .  
O261 O 0.0866(10) -0.6226(8) 0.4165(4) 0.039(5) Uiso 1 1 d . . . .  
O262 O 0.0689(10) -0.5080(8) 0.3969(4) 0.035(5) Uiso 1 1 d . . . .  
O263 O 0.1097(12) -0.4483(10) 0.4435(5) 0.055(6) Uiso 1 1 d . . . .  
O264 O 0.1640(11) -0.6414(9) 0.4667(5) 0.047(6) Uiso 1 1 d . . . .  
O265 O 0.1978(10) -0.5440(8) 0.4248(4) 0.037(5) Uiso 1 1 d . . . .  
O266 O 0.284(4) -0.470(3) 0.3819(17) 0.13(3) Uiso 0.50 1 d P . . .  
O267 O 0.325(3) -0.551(2) 0.4315(10) 0.060(13) Uiso 0.50 1 d P . . .  
O268 O 0.2806(12) -0.6380(9) 0.4124(5) 0.054(6) Uiso 1 1 d . . . .  
O269 O 0.3638(14) -0.6817(11) 0.4564(6) 0.073(8) Uiso 1 1 d . . . .  
O270 O 0.4028(12) -0.6805(9) 0.3927(5) 0.052(6) Uiso 1 1 d . . . .  
O271 O 0.3515(13) -0.5800(11) 0.3611(6) 0.068(7) Uiso 1 1 d . . . .  
O272 O 0.2264(13) -0.5487(10) 0.3576(5) 0.060(7) Uiso 1 1 d . . . .  
O273 O 0.4806(14) -0.5948(11) 0.3602(6) 0.074(8) Uiso 1 1 d . . . .  
O274 O 0.4165(10) -0.6103(8) 0.3124(4) 0.032(5) Uiso 1 1 d . . . .  
O275 O 0.2913(10) -0.6025(8) 0.3025(4) 0.031(5) Uiso 1 1 d . . . .  
O276 O 0.3825(10) -0.6146(8) 0.2553(4) 0.032(5) Uiso 1 1 d . . . .  
O277 O 0.3102(10) -0.7086(8) 0.2835(4) 0.031(5) Uiso 1 1 d . . . .

O278 O 0.1899(10) -0.6701(8) 0.3022(4) 0.033(5) Uiso 1 1 d . . . .  
O279 O 0.2072(11) -0.7321(9) 0.2542(5) 0.049(6) Uiso 1 1 d . . . .  
O280 O 0.1599(10) -0.7819(8) 0.3119(4) 0.035(5) Uiso 1 1 d . . . .  
O281 O 0.1144(12) -0.7412(9) 0.3649(5) 0.050(6) Uiso 1 1 d . . . .  
O282 O 0.1007(14) -0.8547(11) 0.3593(6) 0.072(8) Uiso 1 1 d . . . .  
O283 O 0.1951(12) -0.8202(10) 0.3930(5) 0.055(6) Uiso 1 1 d . . . .  
O284 O 0.1727(10) -0.7161(8) 0.4080(4) 0.039(5) Uiso 1 1 d . . . .  
O285 O 0.1742(13) -0.8134(11) 0.4554(6) 0.068(7) Uiso 1 1 d . . . .  
O286 O 0.2651(12) -0.7411(10) 0.4452(5) 0.056(6) Uiso 1 1 d . . . .  
O287 O 0.3022(11) -0.7488(9) 0.3910(5) 0.045(6) Uiso 1 1 d . . . .  
O288 O 0.3572(11) -0.6957(8) 0.3400(4) 0.040(5) Uiso 1 1 d . . . .  
O289 O 0.2581(10) -0.7615(8) 0.3400(4) 0.039(5) Uiso 1 1 d . . . .  
O290 O 0.2820(11) -0.8149(8) 0.2921(4) 0.041(5) Uiso 1 1 d . . . .  
O291 O 0.2295(11) -0.8720(9) 0.3439(5) 0.048(6) Uiso 1 1 d . . . .  
O292 O 0.2908(12) -0.8478(10) 0.4265(5) 0.056(6) Uiso 1 1 d . . . .  
O293 O 0.3860(12) -0.7806(10) 0.4283(5) 0.059(7) Uiso 1 1 d . . . .  
O294 O 0.4332(11) -0.7147(9) 0.2925(5) 0.043(5) Uiso 1 1 d . . . .  
O295 O 0.4801(12) -0.7033(9) 0.3442(5) 0.054(6) Uiso 1 1 d . . . .  
O296 O 0.3895(11) -0.8124(9) 0.3208(5) 0.048(6) Uiso 1 1 d . . . .  
O297 O 0.4301(12) -0.7999(9) 0.3700(5) 0.052(6) Uiso 1 1 d . . . .  
O298 O 0.3348(11) -0.8619(9) 0.3708(5) 0.050(6) Uiso 1 1 d . . . .  
O299 O 0.4221(13) -0.8939(10) 0.4153(5) 0.060(7) Uiso 1 1 d . . . .  
O300 O 0.5207(11) -0.8044(9) 0.3202(5) 0.048(6) Uiso 1 1 d . . . .  
O301 O 0.3434(12) -0.9214(9) 0.3182(5) 0.051(6) Uiso 1 1 d . . . .  
O302 O 0.1406(10) -0.6275(8) 0.3581(4) 0.039(5) Uiso 1 1 d . . . .  
O303 O 0.0695(12) -0.5834(10) 0.3054(5) 0.058(7) Uiso 1 1 d . . . .  
O304 O 0.2296(12) -0.4846(10) 0.2963(5) 0.055(6) Uiso 1 1 d . . . .  
O305 O 0.1705(12) -0.5487(10) 0.2627(5) 0.058(7) Uiso 1 1 d . . . .  
O306 O 0.1047(11) -0.4905(8) 0.3369(4) 0.041(5) Uiso 1 1 d . . . .  
O307 O 0.0060(9) -0.3965(7) 0.3308(4) 0.023(4) Uiso 1 1 d . . . .  
O308 O 0.0742(9) -0.3971(7) 0.3732(4) 0.029(4) Uiso 1 1 d . . . .  
O309 O -0.1417(10) -0.4733(8) 0.3682(4) 0.034(5) Uiso 1 1 d . . . .  
O310 O -0.114(3) 0.226(2) 0.1325(13) 0.21(2) Uiso 1 1 d . . . .  
O311 O -0.2447(13) 0.0675(10) 0.0520(5) 0.061(7) Uiso 1 1 d . . . .  
O312 O -0.228(2) 0.148(2) 0.2616(10) 0.171(18) Uiso 1 1 d . . . .  
O313 O -0.2283(18) 0.1378(15) 0.3466(8) 0.111(11) Uiso 1 1 d . . . .  
O314 O -0.412(6) -0.096(5) 0.458(3) 0.45(6) Uiso 1 1 d . . . .  
O315 O -0.288(2) -0.2431(18) 0.4914(10) 0.151(16) Uiso 1 1 d . . . .  
O317 O -0.5442(16) -0.1576(13) 0.3377(7) 0.095(10) Uiso 1 1 d . . . .  
O319 O -0.346(3) -0.340(2) 0.2542(11) 0.19(2) Uiso 1 1 d . . . .  
O320 O -0.1393(16) -0.0330(13) 0.0539(7) 0.089(9) Uiso 1 1 d . . . .  
O321 O -0.2907(11) -0.0519(9) 0.0383(5) 0.044(6) Uiso 1 1 d . . . .  
O322 O -0.3549(18) -0.2094(14) 0.0575(7) 0.024(8) Uiso 0.50 1 d P . . .  
O323 O -0.4133(17) -0.0767(14) 0.0104(7) 0.100(10) Uiso 1 1 d . . . .  
O324 O 0.0000 0.0000 0.0000 0.061(10) Uiso 1 2 d S . . . .  
O325 O -0.3047(18) -0.2943(15) -0.0170(8) 0.113(11) Uiso 1 1 d . . . .  
O326 O 0.103(2) -0.2518(16) -0.0146(8) 0.125(13) Uiso 1 1 d . . . .  
O327 O -0.025(3) -0.411(2) -0.0041(11) 0.19(2) Uiso 1 1 d . . . .  
O328 O 0.0031(13) -0.3031(10) 0.0196(5) 0.063(7) Uiso 1 1 d . . . .  
O329 O 0.2503(17) -0.4157(14) -0.0434(7) 0.106(11) Uiso 1 1 d . . . .  
O330 O -0.047(2) -0.1464(17) 0.4414(9) 0.142(15) Uiso 1 1 d . . . .  
O333 O 0.199(2) -0.4293(18) 0.3950(9) 0.144(15) Uiso 1 1 d . . . .  
O334 O 0.3738(12) -1.0405(10) 0.3445(5) 0.058(7) Uiso 1 1 d . . . .  
O335 O -0.042(2) -0.8610(19) 0.3767(10) 0.156(16) Uiso 1 1 d . . . .  
O336 O -0.055(2) -0.8813(19) 0.3366(10) 0.160(17) Uiso 1 1 d . . . .  
O337 O 0.1241(18) -0.7431(14) 0.5081(8) 0.111(11) Uiso 1 1 d . . . .  
O340 O -0.2252(18) 0.1593(15) 0.0678(8) 0.115(12) Uiso 1 1 d . . . .  
O341 O 0.4006(15) -1.0009(12) 0.2967(6) 0.079(8) Uiso 1 1 d . . . .  
O342 O 0.712(4) -0.765(3) 0.3959(16) 0.12(2) Uiso 0.50 1 d P . . .  
O343 O 0.6124(16) -0.8415(13) 0.3664(7) 0.093(10) Uiso 1 1 d . . . .  
O344 O 0.610(2) -0.6962(19) 0.3432(10) 0.163(17) Uiso 1 1 d . . . .  
O345 O 0.6677(19) -0.7714(16) 0.2911(8) 0.122(12) Uiso 1 1 d . . . .  
O346 O -0.1509(16) -0.0588(13) 0.1348(7) 0.093(10) Uiso 1 1 d . . . .  
O347 O 0.5471(17) -0.7332(14) 0.2489(7) 0.099(10) Uiso 1 1 d . . . .

O349 O 0.4509(13) -0.7335(11) 0.2133(6) 0.067(7) Uiso 1 1 d . . . .  
O350 O 0.496(2) -0.5895(16) 0.2033(8) 0.126(13) Uiso 1 1 d . . . .  
O351 O 0.4174(14) -0.6432(11) 0.1506(6) 0.072(8) Uiso 1 1 d . . . .  
O353 O 0.515(2) -0.7052(16) 0.1204(8) 0.127(13) Uiso 1 1 d . . . .  
O354 O 0.1240(8) 0.3952(6) 0.0509(3) 0.009(3) Uiso 1 1 d . . . .  
O355 O 0.3671(16) -0.4903(13) 0.2849(7) 0.091(9) Uiso 1 1 d . . . .  
O356 O 0.2889(12) -0.5170(10) 0.2359(5) 0.056(6) Uiso 1 1 d . . . .  
O357 O 0.6741(18) -0.3079(15) 0.0901(8) 0.114(12) Uiso 1 1 d . . . .  
O358 O 0.555(2) -0.0619(19) 0.2730(10) 0.160(17) Uiso 1 1 d . . . .  
O359 O 0.445(3) -0.221(3) 0.2101(14) 0.25(3) Uiso 1 1 d . . . .  
O360 O -0.278(3) -0.349(2) 0.3635(11) 0.180(19) Uiso 1 1 d . . . .  
O361 O -0.1194(10) -0.5282(8) 0.4298(4) 0.037(5) Uiso 1 1 d . . . .  
O362 O -0.0808(10) -0.6474(8) 0.4423(4) 0.037(5) Uiso 1 1 d . . . .  
O363 O -0.1046(11) -0.5996(9) 0.3851(5) 0.047(6) Uiso 1 1 d . . . .  
O364 O -0.0927(16) -0.6107(12) 0.2709(7) 0.088(9) Uiso 1 1 d . . . .  
O365 O 0.1000(15) -0.2091(12) 0.4640(6) 0.087(9) Uiso 1 1 d . . . .  
O366 O 0.4969(13) -0.2170(11) 0.1533(6) 0.068(7) Uiso 1 1 d . . . .  
O367 O 0.5413(17) -0.2150(13) 0.0835(7) 0.097(10) Uiso 1 1 d . . . .  
O368 O -0.0863(11) -0.3709(9) 0.2909(5) 0.044(5) Uiso 1 1 d . . . .  
O369 O -0.374(6) -0.138(5) 0.037(2) 0.42(6) Uiso 1 1 d . . . .  
O370 O 0.765(3) 0.265(3) 0.0401(13) 0.23(3) Uiso 1 1 d . . . .  
O371 O 0.791(2) 0.128(2) 0.1150(11) 0.173(18) Uiso 1 1 d . . . .  
O372 O 0.3925(16) 0.2146(13) 0.2603(7) 0.095(10) Uiso 1 1 d . . . .  
O373 O 0.0471(12) -0.0791(9) 0.4039(5) 0.052(6) Uiso 1 1 d . . . .  
O374 O 0.179(2) 0.1120(17) 0.2782(9) 0.136(14) Uiso 1 1 d . . . .  
O375 O 0.4877(15) -0.8637(12) 0.2640(6) 0.086(9) Uiso 1 1 d . . . .  
O376 O -0.173(3) 0.013(2) 0.2058(12) 0.20(2) Uiso 1 1 d . . . .  
O377 O -0.1292(11) -0.1611(9) 0.1919(5) 0.047(6) Uiso 1 1 d . . . .  
O378 O 0.3861(17) -0.1184(13) 0.2314(7) 0.100(10) Uiso 1 1 d . . . .  
O379 O 0.2940(8) -0.6642(6) 0.1387(3) 0.012(4) Uiso 1 1 d . . . .  
O380 O 0.381(3) -0.331(2) 0.2362(12) 0.20(2) Uiso 1 1 d . . . .  
O381 O 0.182(2) 0.3270(17) 0.1616(9) 0.134(14) Uiso 1 1 d . . . .  
O382 O 0.0696(15) -0.5961(12) 0.2424(6) 0.084(9) Uiso 1 1 d . . . .  
O383 O 0.203(3) 0.206(2) 0.1856(11) 0.19(2) Uiso 1 1 d . . . .  
O385 O 0.621(3) -0.255(3) 0.1864(14) 0.23(3) Uiso 1 1 d . . . .  
O386 O -0.353(5) -0.340(4) 0.308(2) 0.16(3) Uiso 0.50 1 d P . . . .  
O387 O -0.114(3) -0.602(2) 0.0580(12) 0.20(2) Uiso 1 1 d . . . .  
O388 O 0.687(3) -0.783(2) 0.3491(11) 0.177(19) Uiso 1 1 d . . . .  
O389 O 0.332(3) -0.120(2) 0.0061(13) 0.22(2) Uiso 1 1 d . . . .  
O390 O 0.594(2) -0.3493(16) 0.1357(8) 0.127(13) Uiso 1 1 d . . . .  
O391 O 0.5119(11) -0.9244(9) 0.3611(5) 0.046(6) Uiso 1 1 d . . . .  
O392 O -0.1676(17) -0.3077(14) -0.0131(7) 0.100(10) Uiso 1 1 d . . . .  
O393 O -0.0436(10) -0.0150(7) 0.2299(4) 0.030(5) Uiso 1 1 d . . . .  
O394 O 0.3032(12) 0.1029(10) 0.2525(5) 0.058(7) Uiso 1 1 d . . . .  
O395 O 0.1981(17) -0.9867(14) 0.3604(7) 0.104(11) Uiso 1 1 d . . . .  
O396 O 0.1941(11) -0.5556(8) 0.1924(4) 0.041(5) Uiso 1 1 d . . . .  
O397 O -0.3535(17) 0.1315(14) 0.2372(7) 0.105(11) Uiso 1 1 d . . . .  
O398 O -0.0700(12) -0.6357(9) 0.1208(5) 0.049(6) Uiso 1 1 d . . . .  
Na1 Na 0.0554(4) -0.1194(3) 0.17215(17) 0.0059(18) Uiso 1 1 d . . . .  
Na2 Na 0.5430(13) -0.4786(10) 0.0120(5) 0.134(8) Uiso 1 1 d . . . .  
Na3 Na -0.2245(5) -0.1124(4) 0.0890(2) 0.018(2) Uiso 1 1 d . . . .  
Na4 Na 0.6180(9) -0.2354(7) 0.1383(4) 0.080(5) Uiso 1 1 d . . . .  
Na5 Na 0.7331(7) -0.1379(5) 0.1841(3) 0.052(3) Uiso 1 1 d . . . .  
Na6 Na 0.3833(15) -0.9925(12) 0.3773(6) 0.157(10) Uiso 1 1 d . . . .  
Na7 Na 0.4036(7) -0.6332(6) 0.2019(3) 0.059(4) Uiso 1 1 d . . . .  
Na8 Na 0.2953(12) -0.6610(10) 0.2054(5) 0.122(7) Uiso 1 1 d . . . .  
Na9 Na -0.4137(9) 0.1742(7) 0.2771(4) 0.081(5) Uiso 1 1 d . . . .  
Na10 Na -0.2028(15) -0.0704(12) 0.1863(6) 0.160(10) Uiso 1 1 d . . . .  
Na11 Na -0.2370(11) -0.1930(9) 0.0517(5) 0.108(6) Uiso 1 1 d . . . .  
Na12 Na -0.2214(12) -0.4617(10) 0.2691(5) 0.122(7) Uiso 1 1 d . . . .  
Na13 Na 0.0465(15) -0.9587(12) 0.3830(6) 0.161(10) Uiso 1 1 d . . . .  
Na15 Na -0.2237(4) -0.3719(3) 0.31675(17) 0.0057(18) Uiso 1 1 d . . . .  
Na16 Na -0.0069(4) -0.6321(3) 0.57309(18) 0.0092(19) Uiso 1 1 d . . . .  
Na17 Na -0.3821(5) 0.0167(4) 0.2294(2) 0.022(2) Uiso 1 1 d . . . .



Na18 Na 0.4304(5) -0.2110(4) 0.0057(2) 0.025(2) Uiso 1 1 d . . .  
Na19 Na 0.0718(11) 0.3766(9) 0.1033(4) 0.105(6) Uiso 1 1 d . . .  
K3 K 0.6868(3) -0.2069(2) 0.23713(13) 0.0217(14) Uani 1 1 d . . .  
As1 As 0.47651(16) 0.03797(12) 0.12854(6) 0.0288(7) Uani 1 1 d . . .  
As2 As 0.12475(15) 0.08632(11) 0.09543(6) 0.0253(7) Uani 1 1 d . . .  
As3 As 0.27907(14) -0.36693(10) 0.10224(6) 0.0201(6) Uani 1 1 d . . .  
As4 As -0.07756(15) -0.38449(11) 0.15063(6) 0.0260(7) Uani 1 1 d . . .  
. . .  
As5 As 0.12535(17) -0.18775(12) 0.31175(6) 0.0309(8) Uani 1 1 d . . .  
As6 As -0.23057(19) -0.11621(13) 0.35175(7) 0.0440(10) Uani 1 1 d . . .  
. . .  
As7 As -0.06094(17) -0.58479(12) 0.41590(7) 0.0365(8) Uani 1 1 d . . .  
. . .  
As8 As 0.27658(18) -0.70401(12) 0.35737(7) 0.0386(9) Uani 1 1 d . . .  
Cs1 Cs 0.07868(11) -0.13061(8) 0.01969(5) 0.0442(5) Uani 1 1 d . . .  
Cs2 Cs 0.29162(16) -0.18172(13) 0.17781(6) 0.0814(9) Uani 1 1 d . . .  
Cs3 Cs 0.10167(11) -0.40922(8) 0.27067(4) 0.0393(5) Uani 1 1 d . . .  
Eu1 Eu 0.39944(7) -0.06668(5) 0.08681(3) 0.0236(3) Uani 1 1 d . . .  
Eu2 Eu 0.16554(8) 0.02703(6) 0.17552(3) 0.0311(4) Uani 1 1 d . . .  
Eu3 Eu 0.20514(7) -0.35351(5) 0.18246(3) 0.0224(3) Uani 1 1 d . . .  
Eu4 Eu -0.01329(7) -0.24221(6) 0.11340(3) 0.0236(3) Uani 1 1 d . . .  
Eu5 Eu 0.00041(8) -0.21837(5) 0.26367(3) 0.0266(4) Uani 1 1 d . . .  
Eu6 Eu -0.13406(9) -0.25847(6) 0.38757(3) 0.0405(5) Uani 1 1 d . . .  
Eu7 Eu 0.08859(9) -0.55228(6) 0.44637(3) 0.0363(4) Uani 1 1 d . . .  
Eu8 Eu 0.17845(9) -0.57245(6) 0.31639(3) 0.0355(4) Uani 1 1 d . . .  
W1 W 0.59472(7) 0.14230(5) 0.08886(3) 0.0402(3) Uani 1 1 d . . .  
W2 W 0.65626(8) 0.01440(6) 0.14305(3) 0.0451(4) Uani 1 1 d . . .  
W3 W 0.54971(8) 0.13955(5) 0.17121(3) 0.0434(4) Uani 1 1 d . . .  
W4 W 0.43772(8) 0.04723(5) 0.20456(3) 0.0403(3) Uani 1 1 d . . .  
W5 W 0.54775(7) -0.07591(5) 0.18108(3) 0.0393(3) Uani 1 1 d . . .  
W6 W 0.58658(7) -0.07646(5) 0.10699(3) 0.0336(3) Uani 1 1 d . . .  
W7 W 0.52883(7) 0.04805(5) 0.05253(3) 0.0328(3) Uani 1 1 d . . .  
W8 W 0.43802(7) 0.16841(5) 0.07287(3) 0.0347(3) Uani 1 1 d . . .  
W9 W 0.39550(7) 0.16627(5) 0.15474(3) 0.0367(3) Uani 1 1 d . . .  
W10 W 0.30285(6) 0.08423(4) 0.11181(3) 0.0266(3) Uani 1 1 d . . .  
W11 W 0.19342(7) 0.22673(5) 0.09389(3) 0.0366(3) Uani 1 1 d . . .  
W12 W 0.24038(6) 0.12818(5) 0.03728(2) 0.0271(3) Uani 1 1 d . . .  
W13 W 0.16493(6) 0.00919(4) 0.03424(2) 0.0229(3) Uani 1 1 d . . .  
W14 W 0.02850(6) -0.02972(5) 0.08852(3) 0.0288(3) Uani 1 1 d . . .  
W15 W -0.01185(7) 0.05630(6) 0.14262(3) 0.0406(4) Uani 1 1 d . . .  
W16 W 0.07069(8) 0.18523(5) 0.14530(3) 0.0454(4) Uani 1 1 d . . .  
W17 W 0.03831(8) 0.23992(5) 0.07396(3) 0.0432(4) Uani 1 1 d . . .  
W18 W 0.09029(7) 0.14444(5) 0.01513(3) 0.0317(3) Uani 1 1 d . . .  
W19 W -0.04679(7) 0.10751(6) 0.07091(3) 0.0420(4) Uani 1 1 d . . .  
W20 W 0.20180(6) -0.07660(4) 0.10817(2) 0.0199(3) Uani 1 1 d . . .  
W21 W 0.17570(6) -0.21537(4) 0.11441(2) 0.0186(2) Uani 1 1 d . . .  
W22 W 0.24765(6) -0.26099(5) 0.04125(2) 0.0255(3) Uani 1 1 d . . .  
W23 W 0.36017(6) -0.23623(4) 0.09448(2) 0.0233(3) Uani 1 1 d . . .  
W24 W 0.39387(6) -0.34768(5) 0.14886(2) 0.0262(3) Uani 1 1 d . . .  
W25 W 0.33020(6) -0.48759(4) 0.15121(3) 0.0291(3) Uani 1 1 d . . .  
W26 W 0.23362(7) -0.51588(5) 0.10003(3) 0.0329(3) Uani 1 1 d . . .  
W27 W 0.19108(6) -0.39074(5) 0.04339(3) 0.0298(3) Uani 1 1 d . . .  
W28 W 0.34811(6) -0.37640(5) 0.02133(3) 0.0304(3) Uani 1 1 d . . .  
W29 W 0.45954(6) -0.35618(5) 0.07668(3) 0.0274(3) Uani 1 1 d . . .  
W30 W 0.39339(6) -0.50003(5) 0.07956(3) 0.0311(3) Uani 1 1 d . . .  
W31 W 0.10097(6) -0.39662(4) 0.11941(3) 0.0243(3) Uani 1 1 d . . .  
W32 W -0.02339(7) -0.46652(5) 0.08496(3) 0.0353(3) Uani 1 1 d . . .  
W33 W 0.01749(6) -0.51921(5) 0.16229(3) 0.0317(3) Uani 1 1 d . . .  
W34 W -0.04306(6) -0.45183(5) 0.22231(3) 0.0299(3) Uani 1 1 d . . .  
W35 W -0.16426(6) -0.32280(5) 0.21465(3) 0.0306(3) Uani 1 1 d . . .  
W36 W -0.19899(6) -0.26972(5) 0.14423(3) 0.0303(3) Uani 1 1 d . . .  
W37 W -0.12848(7) -0.34201(5) 0.07977(3) 0.0328(3) Uani 1 1 d . . .  
W38 W -0.18238(7) -0.47048(6) 0.11230(3) 0.0404(3) Uani 1 1 d . . .  
W39 W -0.25600(7) -0.39550(5) 0.17803(3) 0.0378(3) Uani 1 1 d . . .

W40 W -0.13738 (7) -0.52689 (5) 0.18952 (3) 0.0385 (3) Uani 1 1 d . . .  
W41 W 0.01613 (6) -0.30288 (4) 0.20197 (2) 0.0238 (3) Uani 1 1 d . . .  
W42 W 0.13210 (7) -0.09872 (5) 0.24386 (2) 0.0292 (3) Uani 1 1 d . . .  
W43 W 0.19663 (6) -0.25316 (4) 0.25025 (2) 0.0265 (3) Uani 1 1 d . . .  
W44 W 0.21131 (7) -0.33164 (5) 0.31852 (3) 0.0328 (3) Uani 1 1 d . . .  
W45 W 0.14540 (8) -0.26133 (5) 0.38408 (3) 0.0425 (4) Uani 1 1 d . . .  
W46 W 0.09026 (8) -0.11814 (6) 0.37654 (3) 0.0452 (4) Uani 1 1 d . . .  
W47 W 0.07823 (8) -0.02434 (5) 0.30417 (3) 0.0401 (4) Uani 1 1 d . . .  
W48 W 0.24035 (8) -0.06671 (5) 0.28853 (3) 0.0396 (4) Uani 1 1 d . . .  
W49 W 0.30899 (7) -0.22443 (5) 0.29339 (3) 0.0354 (3) Uani 1 1 d . . .  
W50 W 0.24921 (8) -0.15920 (6) 0.36279 (3) 0.0451 (4) Uani 1 1 d . . .  
W51 W -0.05052 (7) -0.12638 (5) 0.33384 (3) 0.0366 (3) Uani 1 1 d . . .  
W52 W -0.13841 (9) -0.01892 (6) 0.38404 (3) 0.0551 (5) Uani 1 1 d . . .  
W53 W -0.16408 (8) -0.00098 (5) 0.30350 (3) 0.0445 (4) Uani 1 1 d . . .  
W54 W -0.25734 (8) -0.08389 (6) 0.27517 (3) 0.0453 (4) Uani 1 1 d . . .  
W55 W -0.34809 (9) -0.18896 (6) 0.32592 (4) 0.0585 (5) Uani 1 1 d . . .  
W56 W -0.32721 (9) -0.20836 (6) 0.39984 (4) 0.0609 (5) Uani 1 1 d . . .  
W57 W -0.21975 (9) -0.12195 (6) 0.42935 (3) 0.0604 (5) Uani 1 1 d . . .  
W58 W -0.30209 (10) 0.00452 (6) 0.39834 (3) 0.0675 (6) Uani 1 1 d . . .  
W59 W -0.32557 (8) 0.02395 (6) 0.31671 (3) 0.0534 (5) Uani 1 1 d . . .  
W60 W -0.41366 (9) -0.08403 (7) 0.36977 (4) 0.0691 (6) Uani 1 1 d . . .  
W61 W 0.02946 (7) -0.32806 (5) 0.34327 (2) 0.0311 (3) Uani 1 1 d . . .  
W62 W 0.04427 (7) -0.46647 (5) 0.36288 (3) 0.0317 (3) Uani 1 1 d . . .  
W63 W -0.10202 (7) -0.52962 (5) 0.34262 (3) 0.0401 (4) Uani 1 1 d . . .  
W64 W -0.12951 (7) -0.43454 (5) 0.40160 (3) 0.0344 (3) Uani 1 1 d . . .  
W65 W -0.09834 (7) -0.49558 (5) 0.47172 (3) 0.0366 (3) Uani 1 1 d . . .  
W66 W -0.04892 (8) -0.65321 (5) 0.48849 (3) 0.0433 (4) Uani 1 1 d . . .  
W67 W -0.03251 (8) -0.74833 (5) 0.43657 (3) 0.0514 (4) Uani 1 1 d . . .  
W68 W -0.05929 (8) -0.67555 (6) 0.36007 (3) 0.0505 (4) Uani 1 1 d . . .  
W69 W -0.20915 (8) -0.61671 (6) 0.38216 (4) 0.0548 (4) Uani 1 1 d . . .  
W70 W -0.18225 (9) -0.68446 (6) 0.46009 (4) 0.0551 (4) Uani 1 1 d . . .  
W71 W -0.23334 (8) -0.52320 (6) 0.44325 (3) 0.0476 (4) Uani 1 1 d . . .  
W72 W 0.09995 (8) -0.67137 (5) 0.38911 (3) 0.0428 (4) Uani 1 1 d . . .  
W73 W 0.15765 (8) -0.80900 (5) 0.35481 (3) 0.0502 (4) Uani 1 1 d . . .  
W74 W 0.22736 (7) -0.73522 (5) 0.29118 (3) 0.0370 (3) Uani 1 1 d . . .  
W75 W 0.36031 (7) -0.64738 (5) 0.29110 (3) 0.0353 (3) Uani 1 1 d . . .  
W76 W 0.41934 (8) -0.63031 (6) 0.35570 (3) 0.0487 (4) Uani 1 1 d . . .  
W77 W 0.33746 (9) -0.69979 (7) 0.42530 (3) 0.0615 (5) Uani 1 1 d . . .  
W78 W 0.21937 (9) -0.78619 (6) 0.42502 (3) 0.0595 (5) Uani 1 1 d . . .  
W79 W 0.37215 (9) -0.83297 (7) 0.40097 (3) 0.0622 (5) Uani 1 1 d . . .  
W80 W 0.31273 (8) -0.85276 (5) 0.32881 (3) 0.0468 (4) Uani 1 1 d . . .  
W81 W 0.44828 (8) -0.76169 (6) 0.32888 (3) 0.0452 (4) Uani 1 1 d . . .  
W82 W 0.25957 (17) -0.55948 (13) 0.39359 (7) 0.1077 (10) Uani 0.80 1 d P  
. .

loop\_

\_atom\_site\_aniso\_label  
\_atom\_site\_aniso\_U\_11  
\_atom\_site\_aniso\_U\_22  
\_atom\_site\_aniso\_U\_33  
\_atom\_site\_aniso\_U\_23  
\_atom\_site\_aniso\_U\_13  
\_atom\_site\_aniso\_U\_12  
K3 0.014 (4) 0.016 (3) 0.030 (3) -0.003 (2) 0.011 (3) 0.005 (2)  
As1 0.032 (2) 0.0239 (14) 0.0310 (17) -0.0030 (12) -0.0072 (14) -0.0033  
(13)  
As2 0.034 (2) 0.0178 (13) 0.0200 (15) 0.0014 (11) 0.0009 (13) 0.0058 (12)  
As3 0.0258 (18) 0.0139 (12) 0.0192 (14) -0.0022 (10) -0.0013 (12) 0.0034  
(11)  
As4 0.0263 (19) 0.0185 (13) 0.0309 (16) 0.0006 (11) 0.0022 (13) -0.0025  
(12)  
As5 0.050 (2) 0.0244 (14) 0.0163 (15) -0.0010 (11) 0.0007 (14) 0.0002 (14)  
As6 0.057 (3) 0.0319 (17) 0.0314 (18) 0.0037 (13) 0.0097 (16) 0.0173 (16)  
As7 0.047 (2) 0.0257 (15) 0.0304 (17) 0.0079 (12) 0.0046 (15) 0.0001 (15)

As8 0.055(3) 0.0251(15) 0.0294(17) 0.0020(13) -0.0041(16) 0.0135(15)  
Cs1 0.0420(15) 0.0284(10) 0.0625(14) 0.0003(9) -0.0190(11) -0.0008(9)  
Cs2 0.092(3) 0.0825(19) 0.0688(18) -0.0021(14) -0.0064(16) -0.0155  
(17)  
Cs3 0.0479(15) 0.0320(10) 0.0324(11) 0.0024(8) -0.0003(9) 0.0063(9)  
Eu1 0.0252(9) 0.0187(7) 0.0257(8) 0.0010(5) -0.0031(6) -0.0017(6)  
Eu2 0.0538(12) 0.0179(7) 0.0190(8) -0.0014(5) 0.0024(7) 0.0002(7)  
Eu3 0.0297(9) 0.0147(6) 0.0198(7) 0.0011(5) 0.0013(6) 0.0024(6)  
Eu4 0.0238(9) 0.0237(7) 0.0210(7) -0.0001(5) -0.0013(6) 0.0025(6)  
Eu5 0.0413(11) 0.0172(7) 0.0163(7) 0.0024(5) 0.0028(6) 0.0069(6)  
Eu6 0.0576(13) 0.0286(8) 0.0251(8) 0.0060(6) 0.0086(8) 0.0133(8)  
Eu7 0.0460(12) 0.0254(8) 0.0284(8) 0.0088(6) 0.0078(7) 0.0076(7)  
Eu8 0.0472(12) 0.0211(7) 0.0329(9) 0.0025(6) -0.0013(8) 0.0081(7)  
W1 0.0375(9) 0.0332(7) 0.0528(9) -0.0049(6) -0.0059(7) -0.0145(6)  
W2 0.0402(10) 0.0404(7) 0.0584(9) -0.0103(6) -0.0195(7) -0.0021(7)  
W3 0.0515(11) 0.0335(7) 0.0505(9) -0.0112(6) -0.0170(7) -0.0090(7)  
W4 0.0524(10) 0.0318(7) 0.0386(8) -0.0072(6) -0.0117(7) -0.0030(6)  
W5 0.0498(10) 0.0330(7) 0.0370(8) -0.0044(5) -0.0196(7) 0.0016(6)  
W6 0.0314(8) 0.0320(6) 0.0378(7) -0.0066(5) -0.0083(6) 0.0015(6)  
W7 0.0364(9) 0.0315(6) 0.0313(7) -0.0008(5) -0.0017(6) -0.0118(6)  
W8 0.0383(9) 0.0252(6) 0.0405(8) 0.0029(5) -0.0072(6) -0.0090(6)  
W9 0.0450(10) 0.0242(6) 0.0441(8) -0.0103(5) -0.0115(7) -0.0028(6)  
W10 0.0338(8) 0.0183(5) 0.0278(6) -0.0009(4) -0.0051(5) -0.0035(5)  
W11 0.0640(11) 0.0146(5) 0.0288(7) -0.0017(5) -0.0033(6) 0.0031(6)  
W12 0.0377(8) 0.0200(5) 0.0218(6) 0.0003(4) 0.0022(5) -0.0041(5)  
W13 0.0305(8) 0.0196(5) 0.0170(6) -0.0001(4) 0.0002(5) -0.0017(5)  
W14 0.0255(8) 0.0321(6) 0.0258(6) 0.0039(5) -0.0010(5) -0.0013(5)  
W15 0.0423(10) 0.0392(7) 0.0306(7) 0.0046(5) 0.0105(6) 0.0105(6)  
W16 0.0756(12) 0.0240(6) 0.0282(7) -0.0034(5) 0.0082(7) 0.0166(7)  
W17 0.0607(11) 0.0248(6) 0.0349(7) 0.0032(5) 0.0002(7) 0.0187(6)  
W18 0.0421(9) 0.0268(6) 0.0224(6) 0.0058(5) -0.0061(6) 0.0031(6)  
W19 0.0326(9) 0.0440(8) 0.0408(8) 0.0090(6) -0.0033(6) 0.0121(6)  
W20 0.0266(7) 0.0128(5) 0.0182(6) 0.0007(4) -0.0007(5) 0.0011(5)  
W21 0.0228(7) 0.0132(5) 0.0177(6) 0.0003(4) -0.0003(5) 0.0020(4)  
W22 0.0293(8) 0.0253(6) 0.0185(6) -0.0006(4) 0.0006(5) 0.0053(5)  
W23 0.0243(7) 0.0165(5) 0.0265(6) -0.0003(4) 0.0015(5) 0.0010(5)  
W24 0.0286(8) 0.0226(6) 0.0255(6) -0.0007(5) -0.0047(5) 0.0035(5)  
W25 0.0340(8) 0.0162(5) 0.0314(7) 0.0021(5) 0.0033(6) 0.0076(5)  
W26 0.0342(9) 0.0180(6) 0.0449(8) -0.0101(5) 0.0052(6) 0.0025(5)  
W27 0.0305(8) 0.0322(6) 0.0275(7) -0.0126(5) -0.0017(5) 0.0021(6)  
W28 0.0343(8) 0.0320(6) 0.0224(6) -0.0076(5) 0.0038(5) 0.0054(6)  
W29 0.0243(8) 0.0226(6) 0.0322(7) -0.0022(5) 0.0023(5) 0.0039(5)  
W30 0.0341(8) 0.0201(6) 0.0364(7) -0.0075(5) 0.0042(6) 0.0060(5)  
W31 0.0250(8) 0.0188(5) 0.0288(6) -0.0059(4) 0.0004(5) 0.0000(5)  
W32 0.0339(9) 0.0346(7) 0.0405(8) -0.0150(6) -0.0015(6) -0.0059(6)  
W33 0.0311(8) 0.0173(5) 0.0452(8) -0.0054(5) 0.0018(6) -0.0002(5)  
W34 0.0334(8) 0.0187(5) 0.0324(7) 0.0043(5) 0.0047(6) 0.0014(5)  
W35 0.0294(8) 0.0263(6) 0.0305(7) 0.0022(5) 0.0066(6) 0.0037(5)  
W36 0.0245(8) 0.0295(6) 0.0331(7) 0.0025(5) -0.0003(5) 0.0021(5)  
W37 0.0307(8) 0.0366(7) 0.0315(7) -0.0041(5) -0.0057(6) -0.0038(6)  
W38 0.0341(9) 0.0372(7) 0.0526(9) -0.0096(6) -0.0039(7) -0.0103(6)  
W39 0.0264(8) 0.0342(7) 0.0489(8) 0.0020(6) 0.0032(6) -0.0029(6)  
W40 0.0337(9) 0.0241(6) 0.0545(9) 0.0027(6) 0.0025(7) -0.0064(6)  
W41 0.0275(8) 0.0220(5) 0.0179(6) 0.0021(4) 0.0021(5) 0.0030(5)  
W42 0.0497(9) 0.0184(5) 0.0171(6) 0.0000(4) 0.0018(5) -0.0010(5)  
W43 0.0372(8) 0.0196(5) 0.0204(6) -0.0014(4) 0.0005(5) 0.0020(5)  
W44 0.0441(9) 0.0256(6) 0.0248(6) 0.0055(5) -0.0043(6) 0.0023(6)  
W45 0.0675(11) 0.0377(7) 0.0192(7) 0.0041(5) -0.0039(6) -0.0031(7)  
W46 0.0747(12) 0.0394(7) 0.0193(7) -0.0050(5) 0.0010(7) -0.0004(7)  
W47 0.0703(11) 0.0246(6) 0.0224(7) -0.0046(5) 0.0058(6) 0.0001(6)  
W48 0.0672(11) 0.0299(6) 0.0226(7) -0.0039(5) -0.0005(6) -0.0107(6)  
W49 0.0460(10) 0.0324(7) 0.0280(7) -0.0017(5) -0.0048(6) -0.0067(6)  
W50 0.0686(12) 0.0434(8) 0.0248(7) -0.0033(6) -0.0074(7) -0.0104(7)  
W51 0.0580(10) 0.0266(6) 0.0187(6) 0.0011(5) 0.0057(6) 0.0083(6)

W52 0.0918(14) 0.0350(7) 0.0308(8) -0.0065(6) 0.0093(8) 0.0122(8)  
W53 0.0639(11) 0.0310(7) 0.0299(7) 0.0056(5) 0.0045(7) 0.0101(7)  
W54 0.0476(10) 0.0398(7) 0.0401(8) -0.0003(6) 0.0003(7) 0.0177(7)  
W55 0.0536(12) 0.0411(8) 0.0705(11) 0.0058(7) 0.0032(9) 0.0117(8)  
W56 0.0632(12) 0.0434(8) 0.0584(10) 0.0120(7) 0.0223(8) 0.0169(8)  
W57 0.0968(15) 0.0398(8) 0.0300(8) 0.0008(6) 0.0213(8) 0.0196(8)  
W58 0.1025(16) 0.0385(8) 0.0444(9) -0.0023(7) 0.0237(9) 0.0289(9)  
W59 0.0630(12) 0.0348(7) 0.0483(9) 0.0052(6) 0.0118(8) 0.0224(7)  
W60 0.0643(13) 0.0470(9) 0.0748(12) 0.0134(8) 0.0244(9) 0.0248(8)  
W61 0.0436(9) 0.0225(6) 0.0206(6) 0.0051(5) 0.0030(6) 0.0075(5)  
W62 0.0397(9) 0.0225(6) 0.0248(6) 0.0085(5) 0.0050(6) 0.0077(5)  
W63 0.0488(10) 0.0316(7) 0.0344(7) 0.0044(5) -0.0009(6) 0.0043(6)  
W64 0.0381(9) 0.0279(6) 0.0293(7) 0.0073(5) 0.0053(6) 0.0070(6)  
W65 0.0419(9) 0.0324(7) 0.0277(7) 0.0084(5) 0.0064(6) 0.0034(6)  
W66 0.0564(11) 0.0306(7) 0.0349(8) 0.0121(5) 0.0057(7) -0.0021(6)  
W67 0.0685(12) 0.0270(7) 0.0523(9) 0.0086(6) -0.0005(8) -0.0005(7)  
W68 0.0711(12) 0.0296(7) 0.0470(9) 0.0014(6) -0.0075(8) 0.0033(7)  
W69 0.0556(12) 0.0475(8) 0.0596(10) 0.0050(7) -0.0081(8) -0.0115(8)  
W70 0.0605(12) 0.0405(8) 0.0589(10) 0.0112(7) 0.0044(8) -0.0139(7)  
W71 0.0394(10) 0.0429(8) 0.0534(9) 0.0091(6) 0.0054(7) -0.0029(7)  
W72 0.0589(11) 0.0260(6) 0.0338(7) 0.0067(5) 0.0043(7) 0.0134(6)  
W73 0.0615(12) 0.0230(6) 0.0574(9) 0.0030(6) 0.0111(8) 0.0049(7)  
W74 0.0468(10) 0.0223(6) 0.0393(8) -0.0037(5) -0.0024(6) 0.0039(6)  
W75 0.0444(9) 0.0233(6) 0.0350(7) -0.0027(5) -0.0028(6) 0.0066(6)  
W76 0.0487(11) 0.0493(8) 0.0490(9) -0.0188(7) -0.0094(7) 0.0105(7)  
W77 0.0677(13) 0.0747(11) 0.0339(8) -0.0103(7) -0.0096(8) 0.0328(9)  
W78 0.0786(13) 0.0429(8) 0.0384(8) 0.0172(6) 0.0083(8) 0.0281(8)  
W79 0.0782(13) 0.0503(9) 0.0410(9) 0.0095(7) 0.0001(8) 0.0364(9)  
W80 0.0631(11) 0.0199(6) 0.0496(9) -0.0006(6) 0.0056(7) 0.0120(6)  
W81 0.0531(11) 0.0352(7) 0.0427(8) -0.0080(6) -0.0069(7) 0.0186(7)  
W82 0.116(3) 0.095(2) 0.107(2) -0.0161(17) 0.0001(19) 0.0028(18)

\_geom\_special\_details

;

All esds (except the esd in the dihedral angle between two l.s. planes) are estimated using the full covariance matrix. The cell esds are taken into account individually in the estimation of esds in distances, angles and torsion angles; correlations between esds in cell parameters are only used when they are defined by crystal symmetry. An approximate (isotropic) treatment of cell esds is used for estimating esds involving l.s. planes.

;

loop\_

\_geom\_bond\_atom\_site\_label\_1  
\_geom\_bond\_atom\_site\_label\_2  
\_geom\_bond\_distance  
\_geom\_bond\_site\_symmetry\_2  
\_geom\_bond\_publ\_flag

O1 W1 1.72(2) . ?  
O2 W2 1.71(3) . ?  
O2 Na10 2.85(4) 1\_655 ?  
O3 W3 1.78(2) . ?  
O4 W4 1.75(2) . ?  
O5 W5 1.75(2) . ?  
O5 K3 3.07(2) . ?  
O6 W6 1.739(19) . ?  
O7 W7 1.744(19) . ?  
O8 W8 1.72(2) . ?

O9 W9 1.729(19) . ?  
O10 W2 1.906(19) . ?  
O10 W1 1.924(19) . ?  
O11 W3 1.84(2) . ?  
O11 W2 2.00(2) . ?  
O11 Na17 2.97(2) 1\_655 ?  
O12 W1 1.901(19) . ?  
O12 W3 1.951(19) . ?  
O13 W1 1.91(2) . ?  
O13 W7 2.05(2) . ?  
O14 W2 1.87(2) . ?  
O14 W6 2.08(2) . ?  
O14 Na3 2.89(2) 1\_655 ?  
O15 W2 1.85(2) . ?  
O15 W5 2.04(2) . ?  
O15 Na17 2.85(2) 1\_655 ?  
O15 Na5 2.93(2) . ?  
O16 W3 1.81(2) . ?  
O16 W4 2.15(2) . ?  
O16 Na17 3.01(2) 1\_655 ?  
O17 W9 1.87(2) . ?  
O17 W3 1.97(2) . ?  
O18 W8 1.91(2) . ?  
O18 W1 1.91(2) . ?  
O19 W8 1.895(18) . ?  
O19 W7 1.977(18) . ?  
O20 W7 1.91(2) . ?  
O20 W6 1.93(2) . ?  
O21 W6 1.905(17) . ?  
O21 W5 1.935(17) . ?  
O21 Na4 2.88(2) . ?  
O22 W5 1.924(19) . ?  
O22 W4 1.93(2) . ?  
O22 Na17 2.82(2) 1\_655 ?  
O23 W9 1.914(19) . ?  
O23 W4 1.959(19) . ?  
O24 W9 1.917(17) . ?  
O24 W8 1.919(17) . ?  
O25 As1 1.80(2) . ?  
O25 W3 2.31(2) . ?  
O25 W9 2.32(2) . ?  
O25 W4 2.33(2) . ?  
O26 As1 1.79(2) . ?  
O26 W6 2.267(18) . ?  
O26 W5 2.367(19) . ?  
O26 W2 2.37(2) . ?  
O27 As1 1.820(18) . ?  
O27 W7 2.267(18) . ?  
O27 W1 2.34(2) . ?  
O27 W8 2.392(18) . ?  
O28 W7 1.78(2) . ?  
O28 Eu1 2.34(2) . ?  
O29 W6 1.77(2) . ?  
O29 Eu1 2.41(2) . ?  
O30 W5 1.80(2) . ?  
O31 W4 1.77(2) . ?  
O32 W9 1.886(18) . ?  
O32 W10 1.929(19) . ?  
O33 W8 1.80(2) . ?  
O33 W10 2.052(19) . ?  
O34 W10 1.758(17) . ?  
O34 Eu1 2.338(17) . ?  
O35 W10 1.767(19) . ?  
O35 Eu2 2.269(19) . ?

O36 Eu1 2.425 (19) . ?  
O37 Eu1 2.48 (2) . ?  
O37 Cs2 3.07 (3) . ?  
O38 Eu1 2.48 (2) . ?  
O39 W11 1.784 (18) . ?  
O39 W10 2.140 (17) . ?  
O40 W12 1.875 (16) . ?  
O40 W10 1.922 (17) . ?  
O41 W12 1.893 (17) . ?  
O41 W11 1.938 (17) . ?  
O42 W11 1.895 (19) . ?  
O42 W16 1.99 (2) . ?  
O43 W16 1.92 (2) . ?  
O43 W15 1.928 (18) . ?  
O44 W14 1.915 (18) . ?  
O44 W15 1.941 (18) . ?  
O45 W13 1.913 (18) . ?  
O45 W14 1.926 (17) . ?  
O45 Cs1 3.303 (16) . ?  
O46 W13 1.927 (18) . ?  
O46 W12 1.986 (16) . ?  
O47 As2 1.785 (17) . ?  
O47 W18 2.283 (17) . ?  
O47 W13 2.302 (16) . ?  
O47 W12 2.327 (19) . ?  
O48 As2 1.793 (17) . ?  
O48 W16 2.269 (17) . ?  
O48 W17 2.363 (17) . ?  
O48 W11 2.444 (19) . ?  
O49 As2 1.80 (2) . ?  
O49 W15 2.284 (19) . ?  
O49 W19 2.35 (2) . ?  
O49 W14 2.369 (19) . ?  
O50 W11 1.75 (2) . ?  
O51 W16 1.77 (2) . ?  
O52 W16 1.765 (19) . ?  
O52 Eu2 2.372 (19) . ?  
O53 W15 1.826 (19) . ?  
O53 Eu2 2.34 (2) . ?  
O54 W15 1.75 (2) . ?  
O55 W14 1.802 (18) . ?  
O55 W20 2.125 (19) . ?  
O56 W14 1.72 (2) . ?  
O56 Cs1 3.26 (2) . ?  
O57 W20 1.871 (16) . ?  
O57 W13 1.956 (16) . ?  
O58 W13 1.723 (18) . ?  
O58 Cs1 3.11 (2) . ?  
O59 W12 1.73 (2) . ?  
O60 W12 1.899 (18) . ?  
O60 W18 1.97 (2) . ?  
O60 Na11 2.82 (3) 2 ?  
O61 W17 1.86 (2) . ?  
O61 W11 1.99 (2) . ?  
O62 W17 1.82 (2) . ?  
O62 W16 2.12 (2) . ?  
O63 W19 1.87 (2) . ?  
O63 W15 2.09 (2) . ?  
O64 W19 1.88 (2) . ?  
O64 W14 2.04 (2) . ?  
O65 W13 1.905 (17) . ?  
O65 W18 2.016 (16) . ?  
O66 W18 1.84 (2) . ?  
O66 W19 2.005 (19) . ?

O66 Cs1 3.238 (19) 2 ?  
O67 W19 1.89 (2) . ?  
O67 W17 1.94 (2) . ?  
O68 W18 1.840 (16) . ?  
O68 W17 1.982 (17) . ?  
O69 W19 1.73 (2) . ?  
O69 Cs1 3.33 (2) 2 ?  
O70 W18 1.705 (18) . ?  
O70 Cs1 3.31 (2) 2 ?  
O71 W17 1.73 (2) . ?  
O72 W20 1.719 (19) . ?  
O72 Eu1 2.516 (19) . ?  
O72 Cs2 3.726 (17) . ?  
O73 W20 1.773 (17) . ?  
O73 Eu2 2.324 (17) . ?  
O74 Eu2 2.395 (18) . ?  
O75 Eu2 2.51 (2) . ?  
O76 Eu2 2.54 (2) . ?  
O76 Cs2 3.44 (2) . ?  
O77 W23 1.733 (18) . ?  
O77 Eu1 2.377 (18) . ?  
O78 W22 1.910 (18) . ?  
O78 W23 1.921 (17) . ?  
O79 W22 1.718 (17) . ?  
O79 Cs1 3.174 (19) . ?  
O80 W22 1.923 (16) . ?  
O80 W21 1.927 (15) . ?  
O81 W22 1.90 (2) . ?  
O81 W27 1.970 (18) . ?  
O82 W27 1.902 (17) . ?  
O82 W31 1.907 (18) . ?  
O83 W27 1.73 (2) . ?  
O84 W27 1.910 (16) . ?  
O84 W26 1.930 (16) . ?  
O85 W26 1.804 (18) . ?  
O85 W31 2.107 (17) . ?  
O86 W26 1.72 (2) . ?  
O86 Na19 2.99 (3) 1\_545 ?  
O87 W26 1.953 (18) . ?  
O87 W25 1.970 (19) . ?  
O88 W25 1.776 (17) . ?  
O88 Eu3 2.398 (16) . ?  
O89 W25 1.744 (17) . ?  
O89 Na7 2.41 (2) . ?  
O90 W25 1.909 (17) . ?  
O90 W24 1.935 (15) . ?  
O91 W24 1.761 (17) . ?  
O91 Eu3 2.399 (18) . ?  
O91 Cs2 3.627 (16) . ?  
O92 W24 1.77 (2) . ?  
O93 W24 1.930 (15) . ?  
O93 W23 1.946 (16) . ?  
O93 Cs2 3.522 (16) . ?  
O94 W29 1.859 (16) . ?  
O94 W23 2.031 (17) . ?  
O95 W22 1.894 (19) . ?  
O95 W28 2.047 (18) . ?  
O96 W27 1.924 (17) . ?  
O96 W28 1.973 (18) . ?  
O97 W30 1.885 (18) . ?  
O97 W26 2.036 (17) . ?  
O98 W30 1.844 (19) . ?  
O98 W25 2.089 (19) . ?  
O99 W29 1.868 (17) . ?

O99 W24 2.082(18) . ?  
O100 As3 1.791(17) . ?  
O100 W25 2.235(17) . ?  
O100 W30 2.382(18) . ?  
O100 W26 2.476(19) . ?  
O101 As3 1.801(17) . ?  
O101 W28 2.269(17) . ?  
O101 W22 2.310(16) . ?  
O101 W27 2.350(19) . ?  
O102 As3 1.867(18) . ?  
O102 W24 2.240(16) . ?  
O102 W23 2.328(15) . ?  
O102 W29 2.341(17) . ?  
O103 W28 1.866(18) . ?  
O103 W30 1.987(18) . ?  
O104 W28 1.809(19) . ?  
O104 W29 2.061(19) . ?  
O105 W29 1.900(18) . ?  
O105 W30 1.904(19) . ?  
O106 W30 1.719(18) . ?  
O107 W28 1.723(19) . ?  
O108 W29 1.73(2) . ?  
O109 W21 1.921(16) . ?  
O109 W20 1.941(16) . ?  
O109 Cs2 3.108(17) . ?  
O110 W20 2.119(16) . ?  
O110 W21 2.160(15) . ?  
O110 Cs1 3.731(17) . ?  
O111 W21 1.759(16) . ?  
O111 Eu3 2.380(16) . ?  
O111 Cs2 3.746(17) . ?  
O112 Eu3 2.418(18) . ?  
O112 Cs3 3.52(2) . ?  
O113 W43 1.747(17) . ?  
O113 Eu3 2.491(17) . ?  
O113 Cs2 3.085(18) . ?  
O114 W31 1.747(19) . ?  
O114 Eu3 2.327(18) . ?  
O115 W41 1.727(18) . ?  
O115 Eu3 2.417(18) . ?  
O115 Cs3 3.347(16) . ?  
O116 Eu4 2.477(18) . ?  
O116 Na1 2.82(2) . ?  
O117 W31 1.747(17) . ?  
O117 Eu4 2.301(17) . ?  
O118 W41 1.708(17) . ?  
O118 Eu4 2.405(17) . ?  
O119 W33 1.863(18) . ?  
O119 W32 1.957(18) . ?  
O120 W21 1.738(19) . ?  
O120 Eu4 2.412(19) . ?  
O121 Eu4 2.522(18) . ?  
O121 Cs1 3.187(17) . ?  
O122 Eu4 2.480(19) . ?  
O123 W36 1.77(2) . ?  
O123 Eu4 2.36(2) . ?  
O124 W37 1.78(2) . ?  
O124 Eu4 2.36(2) . ?  
O125 W32 1.82(2) . ?  
O125 W31 2.101(19) . ?  
O126 W33 1.899(16) . ?  
O126 W31 1.939(17) . ?  
O127 W34 1.891(17) . ?  
O127 W41 1.976(16) . ?



O127 Cs3 3.789(17) . ?  
O128 W35 1.828(19) . ?  
O128 W41 2.115(19) . ?  
O129 W35 1.785(18) . ?  
O129 K3 3.154(19) 1\_455 ?  
O130 W34 1.908(18) . ?  
O130 W35 1.912(17) . ?  
O131 W34 1.721(17) . ?  
O131 Cs3 3.054(19) . ?  
O132 W34 1.897(17) . ?  
O132 W33 1.969(17) . ?  
O133 W33 1.73(2) . ?  
O134 W53 1.90(2) . ?  
O134 W52 1.92(2) . ?  
O135 W32 1.72(2) . ?  
O136 W32 1.888(18) . ?  
O136 W37 1.986(18) . ?  
O137 W37 1.74(2) . ?  
O137 Na11 2.94(3) . ?  
O138 W36 1.918(18) . ?  
O138 W37 1.930(19) . ?  
O139 W36 1.72(2) . ?  
O139 Na3 2.74(2) . ?  
O139 Na5 2.96(2) 1\_455 ?  
O139 Na4 2.98(3) 1\_455 ?  
O140 W35 1.936(17) . ?  
O140 W36 1.954(17) . ?  
O140 Na5 2.96(2) 1\_455 ?  
O140 K3 3.278(18) 1\_455 ?  
O141 As4 1.829(18) . ?  
O141 W36 2.260(17) . ?  
O141 W39 2.309(19) . ?  
O141 W35 2.384(17) . ?  
O142 As4 1.826(17) . ?  
O142 W34 2.263(18) . ?  
O142 W40 2.279(19) . ?  
O142 W33 2.318(18) . ?  
O143 As4 1.820(19) . ?  
O143 W37 2.215(18) . ?  
O143 W38 2.37(2) . ?  
O143 W32 2.456(19) . ?  
O144 W38 1.90(2) . ?  
O144 W32 1.98(2) . ?  
O145 W38 1.824(19) . ?  
O145 W37 2.07(2) . ?  
O146 W39 1.886(17) . ?  
O146 W36 2.03(2) . ?  
O146 Na4 2.92(3) 1\_455 ?  
O147 W39 1.900(19) . ?  
O147 W35 2.02(2) . ?  
O148 W34 1.884(19) . ?  
O148 W40 1.990(18) . ?  
O149 W33 1.87(2) . ?  
O149 W40 2.00(2) . ?  
O150 W40 1.831(18) . ?  
O150 W38 2.013(18) . ?  
O151 W39 1.89(2) . ?  
O151 W38 1.93(2) . ?  
O152 W40 1.83(2) . ?  
O152 W39 2.01(2) . ?  
O153 W40 1.72(2) . ?  
O154 W39 1.70(2) . ?  
O155 W38 1.65(3) . ?  
O156 Eu3 2.553(19) . ?

O156 Cs3 3.185 (18) . ?  
O157 W23 1.806 (18) . ?  
O157 W21 2.168 (18) . ?  
O157 Cs2 3.216 (17) . ?  
O158 W42 1.758 (17) . ?  
O158 Eu2 2.434 (18) . ?  
O158 Na1 2.93 (2) . ?  
O159 W42 1.74 (2) . ?  
O159 Eu5 2.426 (19) . ?  
O160 W43 1.926 (16) . ?  
O160 W42 1.930 (16) . ?  
O160 Cs2 3.332 (17) . ?  
O161 W43 1.75 (2) . ?  
O161 Eu5 2.392 (19) . ?  
O161 Cs3 3.609 (17) . ?  
O162 W44 1.932 (16) . ?  
O162 W43 1.947 (16) . ?  
O162 Cs3 3.261 (18) . ?  
O163 W44 1.80 (2) . ?  
O163 W61 2.14 (2) . ?  
O163 Cs3 3.155 (18) . ?  
O164 W44 1.79 (2) . ?  
O165 W44 1.83 (2) . ?  
O165 W45 1.96 (2) . ?  
O166 W45 1.90 (2) . ?  
O166 W61 1.99 (2) . ?  
O167 W45 1.69 (2) . ?  
O168 W45 1.87 (2) . ?  
O168 W46 1.98 (2) . ?  
O169 W61 1.781 (19) . ?  
O169 Eu6 2.348 (18) . ?  
O169 Na16 2.97 (2) 2\_546 ?  
O170 W46 1.88 (2) . ?  
O170 W47 1.93 (2) . ?  
O171 W47 1.77 (2) . ?  
O171 W51 2.13 (2) . ?  
O172 W47 1.701 (19) . ?  
O173 W47 1.928 (17) . ?  
O173 W42 1.967 (16) . ?  
O174 As5 1.803 (19) . ?  
O174 W46 2.285 (18) . ?  
O174 W50 2.32 (2) . ?  
O174 W45 2.323 (18) . ?  
O175 As5 1.839 (18) . ?  
O175 W43 2.242 (17) . ?  
O175 W44 2.327 (17) . ?  
O175 W49 2.36 (2) . ?  
O176 As5 1.815 (17) . ?  
O176 W42 2.162 (17) . ?  
O176 W48 2.416 (19) . ?  
O177 W47 1.92 (2) . ?  
O177 W48 1.921 (18) . ?  
O178 W48 1.868 (17) . ?  
O178 W42 2.038 (19) . ?  
O179 W49 1.862 (18) . ?  
O179 W43 2.05 (2) . ?  
O179 Cs2 3.568 (18) . ?  
O180 W49 1.886 (17) . ?  
O180 W44 1.97 (2) . ?  
O181 W50 1.94 (2) . ?  
O181 W45 1.95 (2) . ?  
O182 W46 1.77 (2) . ?  
O182 W50 2.06 (2) . ?  
O183 W50 1.839 (19) . ?

O183 W49 2.001 (19) . ?  
O184 W49 1.891 (17) . ?  
O184 W48 1.921 (17) . ?  
O185 W50 1.869 (18) . ?  
O185 W48 1.953 (18) . ?  
O186 W50 1.68 (3) . ?  
O187 W49 1.68 (2) . ?  
O188 W48 1.70 (2) . ?  
O189 Eu5 2.523 (19) . ?  
O190 W61 1.744 (17) . ?  
O190 Eu5 2.402 (17) . ?  
O191 Eu5 2.45 (2) . ?  
O192 W41 2.042 (16) . ?  
O192 Eu5 2.418 (16) . ?  
O192 Cs3 3.087 (16) . ?  
O193 W51 1.740 (18) . ?  
O193 Eu5 2.324 (18) . ?  
O194 W41 1.971 (16) . ?  
O194 Eu5 2.336 (16) . ?  
O194 Na1 2.934 (18) . ?  
O195 W51 1.793 (19) . ?  
O195 Eu6 2.285 (19) . ?  
O196 W46 1.88 (2) . ?  
O196 W51 1.96 (2) . ?  
O197 W53 1.900 (18) . ?  
O197 W51 1.943 (19) . ?  
O198 W52 1.84 (2) . ?  
O198 W51 2.09 (2) . ?  
O199 W52 1.72 (2) . ?  
O199 Na13 2.81 (4) 1\_565 ?  
O200 W52 1.88 (2) . ?  
O200 W57 2.03 (2) . ?  
O201 W57 1.80 (2) . ?  
O201 Eu6 2.33 (2) . ?  
O202 W57 1.78 (2) . ?  
O203 W57 1.69 (3) . ?  
O203 W56 2.14 (3) . ?  
O204 W56 1.77 (2) . ?  
O204 Eu6 2.37 (2) . ?  
O205 W56 1.75 (3) . ?  
O206 W56 1.85 (3) . ?  
O206 W55 2.01 (2) . ?  
O207 W55 1.47 (3) . ?  
O208 W55 1.75 (2) . ?  
O209 W54 1.89 (2) . ?  
O209 W55 1.99 (2) . ?  
O209 K3 3.43 (2) 1\_455 ?  
O210 W54 1.76 (2) . ?  
O210 Na10 2.56 (4) . ?  
O210 Na5 2.89 (3) 1\_455 ?  
O210 K3 3.18 (2) 1\_455 ?  
O211 W54 1.79 (2) . ?  
O212 W53 1.89 (2) . ?  
O212 W54 1.97 (2) . ?  
O213 W53 1.74 (2) . ?  
O214 As6 1.797 (18) . ?  
O214 W53 2.30 (2) . ?  
O214 W54 2.311 (19) . ?  
O214 W59 2.348 (19) . ?  
O215 As6 1.76 (2) . ?  
O215 W57 2.30 (2) . ?  
O215 W58 2.37 (2) . ?  
O215 W52 2.47 (2) . ?  
O216 As6 1.82 (2) . ?

O216 W56 2.28(2) . ?  
O216 W55 2.29(2) . ?  
O216 W60 2.36(2) . ?  
O217 W60 1.81(2) . ?  
O217 W55 2.11(2) . ?  
O218 W59 1.92(2) . ?  
O218 W54 2.05(2) . ?  
O218 Na17 2.69(3) . ?  
O219 W53 1.88(2) . ?  
O219 W59 2.05(2) . ?  
O220 W58 1.91(3) . ?  
O220 W52 1.99(2) . ?  
O221 W58 1.90(3) . ?  
O221 W57 2.02(3) . ?  
O222 W60 1.87(2) . ?  
O222 W56 2.04(2) . ?  
O223 W58 1.82(3) . ?  
O223 W60 1.97(3) . ?  
O224 W59 1.89(2) . ?  
O224 W58 1.93(2) . ?  
O225 W59 1.89(2) . ?  
O225 W60 1.97(2) . ?  
O226 W59 1.71(2) . ?  
O226 Na9 2.37(3) . ?  
O227 W58 1.71(2) . ?  
O228 W60 1.71(3) . ?  
O228 Na6 2.83(4) 1\_465 ?  
O229 Eu6 2.47(2) . ?  
O230 Eu6 2.47(2) . ?  
O231 W64 1.763(18) . ?  
O231 Eu6 2.429(19) . ?  
O232 Eu6 2.51(2) . ?  
O232 Na16 2.99(2) 2\_546 ?  
O233 W63 1.88(2) . ?  
O233 W62 2.00(2) . ?  
O234 W64 1.829(19) . ?  
O234 W62 2.190(18) . ?  
O234 Na16 2.793(19) 2\_546 ?  
O235 W64 1.926(18) . ?  
O235 W65 1.964(18) . ?  
O236 W65 1.76(2) . ?  
O236 Eu7 2.387(19) . ?  
O237 W65 1.76(2) . ?  
O237 Eu7 2.33(2) 2\_546 ?  
O238 W65 1.923(19) . ?  
O238 W66 1.930(19) . ?  
O239 W66 1.76(2) . ?  
O239 Eu7 2.36(2) . ?  
O240 W66 1.73(2) . ?  
O240 Na16 2.62(2) . ?  
O241 W67 1.89(2) . ?  
O241 W66 1.93(2) . ?  
O242 W67 1.81(2) . ?  
O242 W72 2.084(19) . ?  
O243 W67 1.71(2) . ?  
O244 W67 1.91(2) . ?  
O244 W68 1.93(2) . ?  
O245 W68 1.89(2) . ?  
O245 W72 1.93(2) . ?  
O246 W68 1.68(2) . ?  
O247 W63 1.914(19) . ?  
O247 W68 1.996(19) . ?  
O248 W63 1.71(2) . ?  
O248 Na12 2.97(3) . ?

O249 W71 1.86 (2) . ?  
O249 W64 2.03 (2) . ?  
O250 W71 1.87 (2) . ?  
O250 W65 2.08 (2) . ?  
O251 W70 1.82 (2) . ?  
O251 W66 2.07 (3) . ?  
O252 W70 1.92 (2) . ?  
O252 W67 1.96 (2) . ?  
O253 W68 1.91 (2) . ?  
O253 W69 1.96 (2) . ?  
O254 W63 1.91 (2) . ?  
O254 W69 1.94 (2) . ?  
O255 W69 1.83 (2) . ?  
O255 W71 2.03 (2) . ?  
O256 W70 1.859 (19) . ?  
O256 W71 1.951 (19) . ?  
O257 W69 1.81 (2) . ?  
O257 W70 2.00 (2) . ?  
O258 W70 1.67 (3) . ?  
O259 W71 1.74 (3) . ?  
O260 W69 1.65 (3) . ?  
O261 W72 1.771 (19) . ?  
O261 Eu7 2.265 (19) . ?  
O262 W62 1.772 (19) . ?  
O262 Eu7 2.364 (19) . ?  
O263 Eu7 2.48 (2) . ?  
O263 Na16 2.75 (2) 2\_546 ?  
O264 Eu7 2.55 (2) . ?  
O265 W82 1.85 (2) . ?  
O265 Eu7 2.40 (2) . ?  
O266 W82 2.16 (8) . ?  
O267 W82 2.35 (5) . ?  
O268 W77 1.81 (2) . ?  
O268 W82 1.91 (2) . ?  
O269 W77 1.68 (3) . ?  
O270 W76 1.91 (2) . ?  
O270 W77 1.93 (2) . ?  
O271 W76 1.74 (3) . ?  
O271 W82 2.33 (3) . ?  
O272 W82 1.80 (2) . ?  
O272 Eu8 2.36 (2) . ?  
O273 W76 1.65 (3) . ?  
O274 W76 1.940 (18) . ?  
O274 W75 1.941 (19) . ?  
O275 W75 1.748 (19) . ?  
O275 Eu8 2.42 (2) . ?  
O276 W75 1.719 (18) . ?  
O276 Na7 2.48 (2) . ?  
O277 W74 1.89 (2) . ?  
O277 W75 1.953 (19) . ?  
O278 W74 1.728 (18) . ?  
O278 Eu8 2.416 (18) . ?  
O279 W74 1.75 (2) . ?  
O280 W73 1.935 (19) . ?  
O280 W74 1.96 (2) . ?  
O281 W73 1.81 (2) . ?  
O281 W72 2.06 (2) . ?  
O282 W73 1.67 (3) . ?  
O282 Na13 2.81 (4) . ?  
O283 W78 1.88 (2) . ?  
O283 W73 1.93 (2) . ?  
O284 W78 1.890 (19) . ?  
O284 W72 1.93 (2) . ?  
O285 W78 1.66 (3) . ?

O286 W78 1.88 (2) . ?  
O286 W77 1.95 (2) . ?  
O287 As8 1.79 (2) . ?  
O287 W77 2.28 (2) . ?  
O287 W79 2.31 (2) . ?  
O287 W78 2.35 (2) . ?  
O288 As8 1.80 (2) . ?  
O288 W75 2.312 (19) . ?  
O288 W76 2.34 (2) . ?  
O288 W81 2.35 (2) . ?  
O289 As8 1.74 (2) . ?  
O289 W74 2.32 (2) . ?  
O289 W80 2.372 (19) . ?  
O289 W73 2.47 (2) . ?  
O290 W80 1.89 (2) . ?  
O290 W74 2.046 (19) . ?  
O291 W80 1.88 (2) . ?  
O291 W73 2.03 (2) . ?  
O292 W78 1.93 (2) . ?  
O292 W79 1.98 (2) . ?  
O293 W79 1.92 (2) . ?  
O293 W77 2.01 (2) . ?  
O294 W81 1.86 (2) . ?  
O294 W75 2.04 (2) . ?  
O295 W81 1.83 (2) . ?  
O295 W76 2.08 (2) . ?  
O296 W81 1.90 (2) . ?  
O296 W80 1.93 (2) . ?  
O297 W79 1.88 (2) . ?  
O297 W81 1.95 (2) . ?  
O298 W79 1.88 (2) . ?  
O298 W80 1.97 (2) . ?  
O299 W79 1.74 (2) . ?  
O300 W81 1.74 (2) . ?  
O300 Na9 2.33 (3) 1\_645 ?  
O301 W80 1.75 (2) . ?  
O302 W72 1.80 (2) . ?  
O302 Eu8 2.24 (2) . ?  
O303 Eu8 2.43 (3) . ?  
O304 Eu8 2.43 (2) . ?  
O304 Cs3 3.23 (2) . ?  
O305 Eu8 2.41 (2) . ?  
O305 Cs3 3.42 (2) . ?  
O306 W62 1.72 (2) . ?  
O306 Eu8 2.52 (2) . ?  
O306 Cs3 3.280 (19) . ?  
O307 W61 1.894 (17) . ?  
O307 W62 2.142 (16) . ?  
O307 Cs3 3.213 (17) . ?  
O308 W62 1.929 (18) . ?  
O308 W61 2.123 (17) . ?  
O308 Na16 2.792 (19) 2\_546 ?  
O309 W64 1.913 (19) . ?  
O309 W63 1.920 (18) . ?  
O319 K3 3.20 (5) 1\_455 ?  
O320 Na3 2.90 (3) . ?  
O321 Na3 2.88 (2) . ?  
O322 O369 1.79 (11) . ?  
O322 Na11 2.52 (4) . ?  
O324 Cs1 3.3077 (18) 2 ?  
O324 Cs1 3.3077 (18) . ?  
O326 Cs1 3.36 (4) . ?  
O334 Na6 2.01 (4) . ?  
O335 Na13 2.74 (5) . ?

O345 Na9 2.42(4) 1\_645 ?  
O346 Na10 2.44(4) . ?  
O347 Na9 2.42(4) 1\_645 ?  
O349 Na7 2.42(3) . ?  
O350 Na7 2.30(4) . ?  
O351 Na7 2.34(3) . ?  
O354 Na19 2.49(2) . ?  
O357 Na4 2.99(4) . ?  
O358 Na17 2.81(5) 1\_655 ?  
O359 Cs2 3.62(7) . ?  
O360 Na15 2.37(5) . ?  
O361 As7 1.814(19) . ?  
O361 W65 2.233(19) . ?  
O361 W64 2.345(18) . ?  
O361 W71 2.39(2) . ?  
O362 As7 1.796(19) . ?  
O362 W66 2.227(19) . ?  
O362 W70 2.40(2) . ?  
O362 W67 2.470(18) . ?  
O363 As7 1.83(2) . ?  
O363 W68 2.28(2) . ?  
O363 W69 2.29(2) . ?  
O363 W63 2.32(2) . ?  
O366 Na4 2.55(3) . ?  
O368 Na15 2.98(2) . ?  
O373 W46 1.74(2) . ?  
O373 Na13 2.81(4) 1\_565 ?  
O375 Na9 2.50(4) 1\_645 ?  
O376 Na10 2.40(6) . ?  
O377 Na10 2.45(4) . ?  
O377 Na5 2.91(3) 1\_455 ?  
O379 Na8 3.01(3) . ?  
O385 Na4 2.15(6) . ?  
O385 K3 3.19(6) . ?  
O386 Na15 2.77(10) . ?  
O389 Na18 2.76(6) . ?  
O390 Na4 2.77(4) . ?  
O397 Na9 2.35(4) . ?  
O397 Na17 2.88(3) . ?  
Na1 Eu2 4.360(8) . ?  
Na1 Cs2 4.996(9) . ?  
Na2 Na2 2.56(5) 2\_645 ?  
Na3 Na11 2.74(2) . ?  
Na3 O14 2.89(2) 1\_455 ?  
Na4 O146 2.92(3) 1\_655 ?  
Na4 O139 2.98(3) 1\_655 ?  
Na5 Na10 2.20(3) 1\_655 ?  
Na5 K3 2.817(14) . ?  
Na5 O210 2.89(3) 1\_655 ?  
Na5 O377 2.91(3) 1\_655 ?  
Na5 O139 2.96(2) 1\_655 ?  
Na5 O140 2.96(2) 1\_655 ?  
Na6 O228 2.83(4) 1\_645 ?  
Na7 Na8 2.41(3) . ?  
Na9 O300 2.33(3) 1\_465 ?  
Na9 O345 2.42(4) 1\_465 ?  
Na9 O347 2.42(4) 1\_465 ?  
Na9 O375 2.50(4) 1\_465 ?  
Na10 Na5 2.20(3) 1\_455 ?  
Na10 O2 2.85(4) 1\_455 ?  
Na10 K3 4.37(3) 1\_455 ?  
Na11 O60 2.82(3) 2 ?  
Na12 Na15 3.19(2) . ?  
Na13 O373 2.81(4) 1\_545 ?

Na13 O199 2.81(4) 1\_545 ?  
Na16 O263 2.75(2) 2\_546 ?  
Na16 O308 2.792(19) 2\_546 ?  
Na16 O234 2.79(2) 2\_546 ?  
Na16 O169 2.97(2) 2\_546 ?  
Na16 O232 2.99(2) 2\_546 ?  
Na16 W61 3.730(8) 2\_546 ?  
Na16 Eu6 4.025(8) 2\_546 ?  
Na17 O358 2.81(5) 1\_455 ?  
Na17 O22 2.82(2) 1\_455 ?  
Na17 O15 2.85(2) 1\_455 ?  
Na17 O11 2.97(2) 1\_455 ?  
Na17 O16 3.01(2) 1\_455 ?  
Na19 O86 2.99(3) 1\_565 ?  
K3 O129 3.154(19) 1\_655 ?  
K3 O210 3.18(2) 1\_655 ?  
K3 O319 3.20(5) 1\_655 ?  
K3 O140 3.278(18) 1\_655 ?  
K3 O209 3.43(2) 1\_655 ?  
K3 W54 3.886(6) 1\_655 ?  
K3 W35 4.000(5) 1\_655 ?  
K3 W55 4.053(6) 1\_655 ?  
K3 Na10 4.37(3) 1\_655 ?  
Cs1 O66 3.238(19) 2 ?  
Cs1 O70 3.31(2) 2 ?  
Cs1 O69 3.33(2) 2 ?  
Cs1 W13 4.062(2) . ?  
Eu5 W41 3.5894(17) . ?  
Eu6 Na16 4.025(8) 2\_546 ?  
Eu7 O237 2.33(2) 2\_546 ?  
W18 Cs1 4.081(3) 2 ?  
W19 Cs1 4.143(3) 2 ?  
W35 K3 4.000(5) 1\_455 ?  
W54 K3 3.886(6) 1\_455 ?  
W55 K3 4.053(6) 1\_455 ?  
W61 W62 3.1840(15) . ?  
W61 Na16 3.730(8) 2\_546 ?

loop\_  
\_geom\_angle\_atom\_site\_label\_1  
\_geom\_angle\_atom\_site\_label\_2  
\_geom\_angle\_atom\_site\_label\_3  
\_geom\_angle  
\_geom\_angle\_site\_symmetry\_1  
\_geom\_angle\_site\_symmetry\_3  
\_geom\_angle\_publ\_flag  
W2 O2 Na10 114.0(13) . 1\_655 ?  
W5 O5 K3 143.8(11) . . ?  
W2 O10 W1 154.9(12) . . ?  
W3 O11 W2 151.4(13) . . ?  
W3 O11 Na17 102.6(9) . 1\_655 ?  
W2 O11 Na17 101.1(8) . 1\_655 ?  
W1 O12 W3 149.1(10) . . ?  
W1 O13 W7 118.8(10) . . ?  
W2 O14 W6 117.8(11) . . ?  
W2 O14 Na3 137.0(11) . 1\_655 ?  
W6 O14 Na3 104.2(8) . 1\_655 ?  
W2 O15 W5 123.3(11) . . ?  
W2 O15 Na17 109.6(8) . 1\_655 ?  
W5 O15 Na17 100.0(8) . 1\_655 ?  
W2 O15 Na5 110.3(9) . . ?  
W5 O15 Na5 104.8(8) . . ?  
Na17 O15 Na5 107.7(7) 1\_655 . ?  
W3 O16 W4 120.6(10) . . ?



W3 O16 Na17 101.8(9) . . 1\_655 ?  
W4 O16 Na17 100.2(7) . . 1\_655 ?  
W9 O17 W3 121.4(10) . . ?  
W8 O18 W1 125.1(10) . . ?  
W8 O19 W7 120.4(9) . . ?  
W7 O20 W6 145.6(13) . . ?  
W6 O21 W5 121.1(9) . . ?  
W6 O21 Na4 101.0(8) . . ?  
W5 O21 Na4 133.1(9) . . ?  
W5 O22 W4 142.6(12) . . ?  
W5 O22 Na17 104.1(9) . . 1\_655 ?  
W4 O22 Na17 113.2(8) . . 1\_655 ?  
W9 O23 W4 121.4(10) . . ?  
W9 O24 W8 148.0(10) . . ?  
As1 O25 W3 135.1(12) . . ?  
As1 O25 W9 117.7(11) . . ?  
W3 O25 W9 92.9(8) . . ?  
As1 O25 W4 113.1(10) . . ?  
W3 O25 W4 95.8(8) . . ?  
W9 O25 W4 93.1(8) . . ?  
As1 O26 W6 116.9(10) . . ?  
As1 O26 W5 117.2(10) . . ?  
W6 O26 W5 92.3(6) . . ?  
As1 O26 W2 134.3(10) . . ?  
W6 O26 W2 93.8(7) . . ?  
W5 O26 W2 92.7(7) . . ?  
As1 O27 W7 115.1(9) . . ?  
As1 O27 W1 131.3(10) . . ?  
W7 O27 W1 95.4(7) . . ?  
As1 O27 W8 122.0(10) . . ?  
W7 O27 W8 92.3(6) . . ?  
W1 O27 W8 91.6(6) . . ?  
W7 O28 Eu1 159.2(11) . . ?  
W6 O29 Eu1 155.3(10) . . ?  
W9 O32 W10 155.3(10) . . ?  
W8 O33 W10 154.7(11) . . ?  
W10 O34 Eu1 165.2(10) . . ?  
W10 O35 Eu2 175.4(11) . . ?  
Eu1 O37 Cs2 129.4(10) . . ?  
W11 O39 W10 152.4(11) . . ?  
W12 O40 W10 151.9(10) . . ?  
W12 O41 W11 144.1(10) . . ?  
W11 O42 W16 122.1(10) . . ?  
W16 O43 W15 143.6(11) . . ?  
W14 O44 W15 120.2(10) . . ?  
W13 O45 W14 144.9(10) . . ?  
W13 O45 Cs1 98.8(6) . . ?  
W14 O45 Cs1 100.7(6) . . ?  
W13 O46 W12 118.8(8) . . ?  
As2 O47 W18 135.8(10) . . ?  
As2 O47 W13 115.7(8) . . ?  
W18 O47 W13 94.2(6) . . ?  
As2 O47 W12 114.9(9) . . ?  
W18 O47 W12 93.4(6) . . ?  
W13 O47 W12 93.4(6) . . ?  
As2 O48 W16 115.7(8) . . ?  
As2 O48 W17 133.6(10) . . ?  
W16 O48 W17 93.6(6) . . ?  
As2 O48 W11 121.1(9) . . ?  
W16 O48 W11 92.1(6) . . ?  
W17 O48 W11 90.8(6) . . ?  
As2 O49 W15 115.0(9) . . ?  
As2 O49 W19 134.0(10) . . ?  
W15 O49 W19 94.1(7) . . ?

As2 O49 W14 120.1(9) . . ?  
W15 O49 W14 91.8(7) . . ?  
W19 O49 W14 92.0(7) . . ?  
W16 O52 Eu2 158.5(12) . . ?  
W15 O53 Eu2 157.0(9) . . ?  
W14 O55 W20 152.1(10) . . ?  
W14 O56 Cs1 107.6(10) . . ?  
W20 O57 W13 152.2(10) . . ?  
W13 O58 Cs1 111.0(9) . . ?  
W12 O60 W18 120.1(9) . . ?  
W12 O60 Na11 117.6(10) . 2 ?  
W18 O60 Na11 121.1(9) . 2 ?  
W17 O61 W11 125.6(10) . . ?  
W17 O62 W16 117.7(10) . . ?  
W19 O63 W15 117.5(11) . . ?  
W19 O64 W14 119.5(12) . . ?  
W13 O65 W18 117.8(9) . . ?  
W18 O66 W19 148.3(11) . . ?  
W18 O66 Cs1 103.6(7) . 2 ?  
W19 O66 Cs1 101.8(7) . 2 ?  
W19 O67 W17 158.6(13) . . ?  
W18 O68 W17 149.3(10) . . ?  
W19 O69 Cs1 105.7(9) . 2 ?  
W18 O70 Cs1 104.2(8) . 2 ?  
W20 O72 Eu1 159.3(9) . . ?  
W20 O72 Cs2 91.3(6) . . ?  
Eu1 O72 Cs2 105.4(5) . . ?  
W20 O73 Eu2 172.4(10) . . ?  
Eu2 O76 Cs2 120.1(8) . . ?  
W23 O77 Eu1 163.9(11) . . ?  
W22 O78 W23 147.7(10) . . ?  
W22 O79 Cs1 128.3(9) . . ?  
W22 O80 W21 149.1(9) . . ?  
W22 O81 W27 120.1(10) . . ?  
W27 O82 W31 154.4(10) . . ?  
W27 O84 W26 144.2(9) . . ?  
W26 O85 W31 151.8(10) . . ?  
W26 O86 Na19 138.0(11) . 1\_545 ?  
W26 O87 W25 120.3(9) . . ?  
W25 O88 Eu3 161.2(10) . . ?  
W25 O89 Na7 149.8(10) . . ?  
W25 O90 W24 142.3(10) . . ?  
W24 O91 Eu3 157.7(9) . . ?  
W24 O91 Cs2 106.6(7) . . ?  
Eu3 O91 Cs2 95.6(5) . . ?  
W24 O93 W23 119.4(9) . . ?  
W24 O93 Cs2 106.1(6) . . ?  
W23 O93 Cs2 95.4(6) . . ?  
W29 O94 W23 121.8(9) . . ?  
W22 O95 W28 116.9(9) . . ?  
W27 O96 W28 119.7(8) . . ?  
W30 O97 W26 121.3(8) . . ?  
W30 O98 W25 118.7(10) . . ?  
W29 O99 W24 119.2(9) . . ?  
As3 O100 W25 116.3(9) . . ?  
As3 O100 W30 134.4(10) . . ?  
W25 O100 W30 94.3(7) . . ?  
As3 O100 W26 119.9(9) . . ?  
W25 O100 W26 92.3(6) . . ?  
W30 O100 W26 89.5(6) . . ?  
As3 O101 W28 137.2(10) . . ?  
As3 O101 W22 114.0(8) . . ?  
W28 O101 W22 94.4(6) . . ?  
As3 O101 W27 115.5(9) . . ?

W28 O101 W27 93.7(6) . . ?  
W22 O101 W27 91.9(6) . . ?  
As3 O102 W24 114.5(8) . . ?  
As3 O102 W23 118.1(8) . . ?  
W24 O102 W23 94.2(6) . . ?  
As3 O102 W29 132.3(8) . . ?  
W24 O102 W29 96.2(6) . . ?  
W23 O102 W29 93.5(6) . . ?  
W28 O103 W30 146.3(11) . . ?  
W28 O104 W29 145.8(10) . . ?  
W29 O105 W30 159.6(11) . . ?  
W21 O109 W20 117.1(8) . . ?  
W21 O109 Cs2 108.8(6) . . ?  
W20 O109 Cs2 107.9(7) . . ?  
W20 O110 W21 100.7(6) . . ?  
W20 O110 Cs1 129.5(6) . . ?  
W21 O110 Cs1 111.5(6) . . ?  
W21 O111 Eu3 169.8(9) . . ?  
W21 O111 Cs2 90.3(6) . . ?  
Eu3 O111 Cs2 92.9(5) . . ?  
Eu3 O112 Cs3 93.9(6) . . ?  
W43 O113 Eu3 147.5(10) . . ?  
W43 O113 Cs2 103.7(7) . . ?  
Eu3 O113 Cs2 108.6(6) . . ?  
W31 O114 Eu3 170.1(11) . . ?  
W41 O115 Eu3 151.9(9) . . ?  
W41 O115 Cs3 102.3(7) . . ?  
Eu3 O115 Cs3 98.4(5) . . ?  
Eu4 O116 Na1 120.4(8) . . ?  
W31 O117 Eu4 173.2(11) . . ?  
W41 O118 Eu4 173.2(11) . . ?  
W33 O119 W32 147.2(10) . . ?  
W21 O120 Eu4 158.9(9) . . ?  
Eu4 O121 Cs1 119.4(6) . . ?  
W36 O123 Eu4 160.5(11) . . ?  
W37 O124 Eu4 159.1(11) . . ?  
W32 O125 W31 151.6(10) . . ?  
W33 O126 W31 149.6(9) . . ?  
W34 O127 W41 153.4(10) . . ?  
W34 O127 Cs3 88.8(5) . . ?  
W41 O127 Cs3 83.8(5) . . ?  
W35 O128 W41 152.4(9) . . ?  
W35 O129 K3 104.8(8) . 1\_455 ?  
W34 O130 W35 148.2(11) . . ?  
W34 O131 Cs3 120.6(8) . . ?  
W34 O132 W33 121.2(9) . . ?  
W53 O134 W52 147.8(11) . . ?  
W32 O136 W37 122.6(9) . . ?  
W37 O137 Na11 115.1(10) . . ?  
W36 O138 W37 142.6(12) . . ?  
W36 O139 Na3 132.6(11) . . ?  
W36 O139 Na5 106.0(9) . 1\_455 ?  
Na3 O139 Na5 96.1(7) . 1\_455 ?  
W36 O139 Na4 106.5(10) . 1\_455 ?  
Na3 O139 Na4 113.1(8) . 1\_455 ?  
Na5 O139 Na4 94.2(7) 1\_455 1\_455 ?  
W35 O140 W36 118.5(9) . . ?  
W35 O140 Na5 141.1(8) . 1\_455 ?  
W36 O140 Na5 99.7(7) . 1\_455 ?  
W35 O140 K3 96.8(6) . 1\_455 ?  
W36 O140 K3 137.8(8) . 1\_455 ?  
Na5 O140 K3 53.4(4) 1\_455 1\_455 ?  
As4 O141 W36 114.4(8) . . ?  
As4 O141 W39 135.2(9) . . ?

W36 O141 W39 95.2(7) . . ?  
As4 O141 W35 117.6(9) . . ?  
W36 O141 W35 92.1(6) . . ?  
W39 O141 W35 92.6(6) . . ?  
As4 O142 W34 115.9(9) . . ?  
As4 O142 W40 134.4(10) . . ?  
W34 O142 W40 95.5(7) . . ?  
As4 O142 W33 114.2(9) . . ?  
W34 O142 W33 94.6(7) . . ?  
W40 O142 W33 93.7(6) . . ?  
As4 O143 W37 116.2(9) . . ?  
As4 O143 W38 131.4(10) . . ?  
W37 O143 W38 95.1(7) . . ?  
As4 O143 W32 121.5(10) . . ?  
W37 O143 W32 93.2(7) . . ?  
W38 O143 W32 90.4(6) . . ?  
W38 O144 W32 124.5(10) . . ?  
W38 O145 W37 120.7(11) . . ?  
W39 O146 W36 119.1(10) . . ?  
W39 O146 Na4 139.9(10) . 1\_455 ?  
W36 O146 Na4 100.2(7) . 1\_455 ?  
W39 O147 W35 119.9(10) . . ?  
W34 O148 W40 120.5(9) . . ?  
W33 O149 W40 120.4(9) . . ?  
W40 O150 W38 148.7(10) . . ?  
W39 O151 W38 157.4(13) . . ?  
W40 O152 W39 147.5(12) . . ?  
Eu3 O156 Cs3 99.7(6) . . ?  
W23 O157 W21 151.6(9) . . ?  
W23 O157 Cs2 109.5(7) . . ?  
W21 O157 Cs2 98.9(6) . . ?  
W42 O158 Eu2 142.6(10) . . ?  
W42 O158 Na1 108.6(8) . . ?  
Eu2 O158 Na1 108.5(6) . . ?  
W42 O159 Eu5 157.4(10) . . ?  
W43 O160 W42 142.1(10) . . ?  
W43 O160 Cs2 91.4(6) . . ?  
W42 O160 Cs2 121.9(7) . . ?  
W43 O161 Eu5 160.6(9) . . ?  
W43 O161 Cs3 100.0(7) . . ?  
Eu5 O161 Cs3 99.4(6) . . ?  
W44 O162 W43 119.5(8) . . ?  
W44 O162 Cs3 99.0(6) . . ?  
W43 O162 Cs3 107.6(7) . . ?  
W44 O163 W61 154.4(10) . . ?  
W44 O163 Cs3 106.1(7) . . ?  
W61 O163 Cs3 98.5(7) . . ?  
W44 O165 W45 147.0(13) . . ?  
W45 O166 W61 153.7(11) . . ?  
W45 O168 W46 121.5(11) . . ?  
W61 O169 Eu6 157.1(10) . . ?  
W61 O169 Na16 100.5(8) . 2\_546 ?  
Eu6 O169 Na16 97.8(6) . 2\_546 ?  
W46 O170 W47 146.6(13) . . ?  
W47 O171 W51 154.6(11) . . ?  
W47 O173 W42 124.1(9) . . ?  
As5 O174 W46 117.4(10) . . ?  
As5 O174 W50 135.1(10) . . ?  
W46 O174 W50 93.7(7) . . ?  
As5 O174 W45 114.6(9) . . ?  
W46 O174 W45 93.5(7) . . ?  
W50 O174 W45 93.3(7) . . ?  
As5 O175 W43 115.5(9) . . ?  
As5 O175 W44 117.8(9) . . ?

W43 O175 W44 94.4(6) . . ?  
As5 O175 W49 133.1(9) . . ?  
W43 O175 W49 94.7(7) . . ?  
W44 O175 W49 93.0(6) . . ?  
As5 O176 W42 118.5(9) . . ?  
As5 O176 W48 132.1(9) . . ?  
W42 O176 W48 95.6(6) . . ?  
W47 O177 W48 127.4(9) . . ?  
W48 O178 W42 120.7(9) . . ?  
W49 O179 W43 119.9(9) . . ?  
W49 O179 Cs2 143.6(8) . . ?  
W43 O179 Cs2 82.9(5) . . ?  
W49 O180 W44 123.6(10) . . ?  
W50 O181 W45 120.3(11) . . ?  
W46 O182 W50 122.3(11) . . ?  
W50 O183 W49 148.6(11) . . ?  
W49 O184 W48 157.9(11) . . ?  
W50 O185 W48 151.0(11) . . ?  
W61 O190 Eu5 169.0(11) . . ?  
W41 O192 Eu5 106.9(7) . . ?  
W41 O192 Cs3 103.5(6) . . ?  
Eu5 O192 Cs3 114.5(6) . . ?  
W51 O193 Eu5 167.8(11) . . ?  
W41 O194 Eu5 112.6(7) . . ?  
W41 O194 Na1 127.2(7) . . ?  
Eu5 O194 Na1 117.3(6) . . ?  
W51 O195 Eu6 169.4(11) . . ?  
W46 O196 W51 151.3(11) . . ?  
W53 O197 W51 149.8(11) . . ?  
W52 O198 W51 148.1(12) . . ?  
W52 O199 Na13 139.4(13) . 1\_565 ?  
W52 O200 W57 121.0(11) . . ?  
W57 O201 Eu6 157.7(13) . . ?  
W57 O203 W56 145.0(14) . . ?  
W56 O204 Eu6 157.7(11) . . ?  
W56 O206 W55 120.6(13) . . ?  
W54 O209 W55 139.9(13) . . ?  
W54 O209 K3 88.9(8) . 1\_455 ?  
W55 O209 K3 92.9(7) . 1\_455 ?  
W54 O210 Na10 136.1(15) . . ?  
W54 O210 Na5 148.6(11) . 1\_455 ?  
Na10 O210 Na5 47.2(8) . 1\_455 ?  
W54 O210 K3 99.9(9) . 1\_455 ?  
Na10 O210 K3 98.8(9) . 1\_455 ?  
Na5 O210 K3 55.1(5) 1\_455 1\_455 ?  
W53 O212 W54 121.0(11) . . ?  
As6 O214 W53 117.4(10) . . ?  
As6 O214 W54 116.5(9) . . ?  
W53 O214 W54 93.6(7) . . ?  
As6 O214 W59 133.5(10) . . ?  
W53 O214 W59 92.5(6) . . ?  
W54 O214 W59 94.5(7) . . ?  
As6 O215 W57 118.8(10) . . ?  
As6 O215 W58 133.4(11) . . ?  
W57 O215 W58 93.4(7) . . ?  
As6 O215 W52 120.2(10) . . ?  
W57 O215 W52 91.1(7) . . ?  
W58 O215 W52 89.4(7) . . ?  
As6 O216 W56 115.4(11) . . ?  
As6 O216 W55 117.9(11) . . ?  
W56 O216 W55 94.4(8) . . ?  
As6 O216 W60 132.5(11) . . ?  
W56 O216 W60 93.7(8) . . ?  
W55 O216 W60 94.7(9) . . ?

W60 O217 W55 121.4 (14) . . ?  
W59 O218 W54 118.9 (12) . . ?  
W59 O218 Na17 133.5 (11) . . ?  
W54 O218 Na17 107.2 (9) . . ?  
W53 O219 W59 117.6 (10) . . ?  
W58 O220 W52 121.6 (11) . . ?  
W58 O221 W57 120.1 (13) . . ?  
W60 O222 W56 120.2 (12) . . ?  
W58 O223 W60 158.1 (15) . . ?  
W59 O224 W58 151.7 (14) . . ?  
W59 O225 W60 147.7 (14) . . ?  
W59 O226 Na9 156.4 (14) . . ?  
W60 O228 Na6 166.2 (15) . 1\_465 ?  
W64 O231 Eu6 147.3 (11) . . ?  
Eu6 O232 Na16 93.8 (7) . 2\_546 ?  
W63 O233 W62 157.4 (10) . . ?  
W64 O234 W62 151.0 (10) . . ?  
W64 O234 Na16 107.0 (7) . 2\_546 ?  
W62 O234 Na16 101.9 (7) . 2\_546 ?  
W64 O235 W65 119.1 (9) . . ?  
W65 O236 Eu7 156.7 (10) . . ?  
W65 O237 Eu7 159.7 (11) . 2\_546 ?  
W65 O238 W66 143.6 (12) . . ?  
W66 O239 Eu7 161.2 (12) . . ?  
W66 O240 Na16 140.5 (12) . . ?  
W67 O241 W66 125.5 (11) . . ?  
W67 O242 W72 151.6 (11) . . ?  
W67 O244 W68 145.2 (13) . . ?  
W68 O245 W72 153.7 (12) . . ?  
W63 O247 W68 120.0 (10) . . ?  
W63 O248 Na12 134.7 (12) . . ?  
W71 O249 W64 121.3 (11) . . ?  
W71 O250 W65 118.3 (11) . . ?  
W70 O251 W66 120.8 (12) . . ?  
W70 O252 W67 123.9 (12) . . ?  
W68 O253 W69 121.2 (12) . . ?  
W63 O254 W69 122.9 (12) . . ?  
W69 O255 W71 146.9 (13) . . ?  
W70 O256 W71 158.9 (12) . . ?  
W69 O257 W70 151.2 (13) . . ?  
W72 O261 Eu7 167.8 (12) . . ?  
W62 O262 Eu7 170.2 (11) . . ?  
Eu7 O263 Na16 114.1 (9) . 2\_546 ?  
W82 O265 Eu7 146.6 (11) . . ?  
W77 O268 W82 152.6 (15) . . ?  
W76 O270 W77 144.0 (13) . . ?  
W76 O271 W82 143.7 (14) . . ?  
W82 O272 Eu8 158.2 (13) . . ?  
W76 O274 W75 120.4 (10) . . ?  
W75 O275 Eu8 159.0 (10) . . ?  
W75 O276 Na7 142.7 (10) . . ?  
W74 O277 W75 142.8 (10) . . ?  
W74 O278 Eu8 158.9 (12) . . ?  
W73 O280 W74 121.3 (10) . . ?  
W73 O281 W72 153.1 (13) . . ?  
W73 O282 Na13 154.5 (16) . . ?  
W78 O283 W73 148.0 (13) . . ?  
W78 O284 W72 153.8 (12) . . ?  
W78 O286 W77 122.7 (12) . . ?  
As8 O287 W77 115.3 (10) . . ?  
As8 O287 W79 135.1 (11) . . ?  
W77 O287 W79 95.5 (8) . . ?  
As8 O287 W78 115.8 (11) . . ?  
W77 O287 W78 93.5 (7) . . ?

W79 O287 W78 92.5(7) . . ?  
As8 O288 W75 113.9(10) . . ?  
As8 O288 W76 120.5(10) . . ?  
W75 O288 W76 92.7(7) . . ?  
As8 O288 W81 134.1(10) . . ?  
W75 O288 W81 92.9(7) . . ?  
W76 O288 W81 92.9(8) . . ?  
As8 O289 W74 115.3(9) . . ?  
As8 O289 W80 135.5(11) . . ?  
W74 O289 W80 92.7(7) . . ?  
As8 O289 W73 122.3(10) . . ?  
W74 O289 W73 89.9(7) . . ?  
W80 O289 W73 89.5(7) . . ?  
W80 O290 W74 119.6(10) . . ?  
W80 O291 W73 121.2(11) . . ?  
W78 O292 W79 118.2(11) . . ?  
W79 O293 W77 119.6(12) . . ?  
W81 O294 W75 120.1(10) . . ?  
W81 O295 W76 120.7(13) . . ?  
W81 O296 W80 155.0(12) . . ?  
W79 O297 W81 150.5(14) . . ?  
W79 O298 W80 149.1(13) . . ?  
W81 O300 Na9 137.7(12) . 1\_645 ?  
W72 O302 Eu8 172.0(12) . . ?  
Eu8 O304 Cs3 96.2(8) . . ?  
Eu8 O305 Cs3 91.6(7) . . ?  
W62 O306 Eu8 150.2(11) . . ?  
W62 O306 Cs3 112.6(8) . . ?  
Eu8 O306 Cs3 93.3(6) . . ?  
W61 O307 W62 104.0(8) . . ?  
W61 O307 Cs3 102.4(7) . . ?  
W62 O307 Cs3 103.3(6) . . ?  
W62 O308 W61 103.5(8) . . ?  
W62 O308 Na16 109.6(8) . 2\_546 ?  
W61 O308 Na16 97.8(7) . 2\_546 ?  
W64 O309 W63 144.1(11) . . ?  
O369 O322 Na11 90(4) . . ?  
Cs1 O324 Cs1 180.00(10) 2 . . ?  
As7 O361 W65 116.5(10) . . ?  
As7 O361 W64 118.9(9) . . ?  
W65 O361 W64 94.2(7) . . ?  
As7 O361 W71 132.6(10) . . ?  
W65 O361 W71 94.3(7) . . ?  
W64 O361 W71 91.7(7) . . ?  
As7 O362 W66 116.7(10) . . ?  
As7 O362 W70 131.8(10) . . ?  
W66 O362 W70 94.0(7) . . ?  
As7 O362 W67 122.6(9) . . ?  
W66 O362 W67 92.7(7) . . ?  
W70 O362 W67 89.4(6) . . ?  
As7 O363 W68 116.1(11) . . ?  
As7 O363 W69 133.4(11) . . ?  
W68 O363 W69 94.9(8) . . ?  
As7 O363 W63 115.1(10) . . ?  
W68 O363 W63 94.8(8) . . ?  
W69 O363 W63 94.5(8) . . ?  
W46 O373 Na13 108.3(11) . 1\_565 ?  
Na10 O377 Na5 47.6(9) . 1\_455 ?  
Na4 O385 K3 136(3) . . ?  
Na9 O397 Na17 116.3(14) . . ?  
O116 Na1 O158 167.8(6) . . ?  
O116 Na1 O194 75.3(5) . . ?  
O158 Na1 O194 107.5(5) . . ?  
O116 Na1 Eu2 143.3(4) . . ?

O158 Na1 Eu2 32.0(4) . . ?  
O194 Na1 Eu2 139.4(4) . . ?  
O116 Na1 Cs2 133.0(4) . . ?  
O158 Na1 Cs2 59.1(4) . . ?  
O194 Na1 Cs2 95.7(4) . . ?  
Eu2 Na1 Cs2 67.25(13) . . ?  
O139 Na3 Na11 81.6(6) . . ?  
O139 Na3 O321 135.2(7) . . ?  
Na11 Na3 O321 72.1(6) . . ?  
O139 Na3 O14 90.8(6) . 1\_455 ?  
Na11 Na3 O14 124.3(7) . 1\_455 ?  
O321 Na3 O14 75.8(6) . 1\_455 ?  
O139 Na3 O320 151.4(9) . . ?  
Na11 Na3 O320 104.8(8) . . ?  
O321 Na3 O320 72.2(8) . . ?  
O14 Na3 O320 107.2(8) 1\_455 . ?  
O385 Na4 O366 81.9(19) . . ?  
O385 Na4 O390 90.0(19) . . ?  
O366 Na4 O390 85.0(11) . . ?  
O385 Na4 O21 86.7(17) . . ?  
O366 Na4 O21 72.5(8) . . ?  
O390 Na4 O21 157.5(12) . . ?  
O385 Na4 O146 66.7(17) . 1\_655 ?  
O366 Na4 O146 138.1(9) . 1\_655 ?  
O390 Na4 O146 68.6(10) . 1\_655 ?  
O21 Na4 O146 129.3(8) . 1\_655 ?  
O385 Na4 O139 89.9(19) . 1\_655 ?  
O366 Na4 O139 153.8(10) . 1\_655 ?  
O390 Na4 O139 120.0(11) . 1\_655 ?  
O21 Na4 O139 82.3(7) . 1\_655 ?  
O146 Na4 O139 56.7(6) 1\_655 1\_655 ?  
O385 Na4 O357 129.1(18) . . ?  
O366 Na4 O357 123.4(11) . . ?  
O390 Na4 O357 54.7(11) . . ?  
O21 Na4 O357 140.0(10) . . ?  
O146 Na4 O357 66.5(8) 1\_655 . ?  
O139 Na4 O357 80.8(9) 1\_655 . ?  
Na10 Na5 K3 120.6(9) 1\_655 . ?  
Na10 Na5 O210 58.4(9) 1\_655 1\_655 ?  
K3 Na5 O210 67.6(6) . 1\_655 ?  
Na10 Na5 O377 55.1(9) 1\_655 1\_655 ?  
K3 Na5 O377 98.2(6) . 1\_655 ?  
O210 Na5 O377 83.7(7) 1\_655 1\_655 ?  
Na10 Na5 O15 84.7(9) 1\_655 . ?  
K3 Na5 O15 103.7(6) . . ?  
O210 Na5 O15 74.4(7) 1\_655 . ?  
O377 Na5 O15 139.8(8) 1\_655 . ?  
Na10 Na5 O139 119.2(10) 1\_655 1\_655 ?  
K3 Na5 O139 111.0(6) . 1\_655 ?  
O210 Na5 O139 172.6(8) 1\_655 1\_655 ?  
O377 Na5 O139 89.4(7) 1\_655 1\_655 ?  
O15 Na5 O139 112.8(7) . 1\_655 ?  
Na10 Na5 O140 116.6(10) 1\_655 1\_655 ?  
K3 Na5 O140 69.0(5) . 1\_655 ?  
O210 Na5 O140 118.2(7) 1\_655 1\_655 ?  
O377 Na5 O140 61.6(6) 1\_655 1\_655 ?  
O15 Na5 O140 158.4(8) . 1\_655 ?  
O139 Na5 O140 55.6(6) 1\_655 1\_655 ?  
O334 Na6 O228 82.7(13) . 1\_645 ?  
O350 Na7 O351 97.1(13) . . ?  
O350 Na7 O89 86.6(11) . . ?  
O351 Na7 O89 81.1(8) . . ?  
O350 Na7 Na8 167.6(12) . . ?  
O351 Na7 Na8 90.5(10) . . ?



O89 Na7 Na8 84.9(8) . . ?  
O350 Na7 O349 97.0(12) . . ?  
O351 Na7 O349 89.2(10) . . ?  
O89 Na7 O349 170.0(10) . . ?  
Na8 Na7 O349 92.9(10) . . ?  
O350 Na7 O276 83.6(11) . . ?  
O351 Na7 O276 174.9(10) . . ?  
O89 Na7 O276 93.9(7) . . ?  
Na8 Na7 O276 88.0(9) . . ?  
O349 Na7 O276 95.7(8) . . ?  
Na7 Na8 O379 95.3(9) . . ?  
O300 Na9 O397 167.4(13) 1\_465 . ?  
O300 Na9 O226 85.4(9) 1\_465 . ?  
O397 Na9 O226 85.2(11) . . ?  
O300 Na9 O345 89.4(12) 1\_465 1\_465 ?  
O397 Na9 O345 99.2(14) . 1\_465 ?  
O226 Na9 O345 90.9(12) . 1\_465 ?  
O300 Na9 O347 91.4(11) 1\_465 1\_465 ?  
O397 Na9 O347 98.5(12) . 1\_465 ?  
O226 Na9 O347 174.8(13) . 1\_465 ?  
O345 Na9 O347 85.0(13) 1\_465 1\_465 ?  
O300 Na9 O375 83.7(11) 1\_465 1\_465 ?  
O397 Na9 O375 89.2(12) . 1\_465 ?  
O226 Na9 O375 97.6(11) . 1\_465 ?  
O345 Na9 O375 168.6(13) 1\_465 1\_465 ?  
O347 Na9 O375 86.2(12) 1\_465 1\_465 ?  
Na5 Na10 O376 153(2) 1\_455 . ?  
Na5 Na10 O346 101.2(14) 1\_455 . ?  
O376 Na10 O346 102.2(18) . . ?  
Na5 Na10 O377 77.4(11) 1\_455 . ?  
O376 Na10 O377 117.4(19) . . ?  
O346 Na10 O377 83.6(12) . . ?  
Na5 Na10 O210 74.4(11) 1\_455 . ?  
O376 Na10 O210 80.9(16) . . ?  
O346 Na10 O210 172.4(17) . . ?  
O377 Na10 O210 101.3(12) . . ?  
Na5 Na10 O2 98.4(13) 1\_455 1\_455 ?  
O376 Na10 O2 80.0(16) . 1\_455 ?  
O346 Na10 O2 66.4(11) . 1\_455 ?  
O377 Na10 O2 148.5(14) . 1\_455 ?  
O210 Na10 O2 107.6(13) . 1\_455 ?  
Na5 Na10 K3 33.7(6) 1\_455 1\_455 ?  
O376 Na10 K3 125.7(16) . 1\_455 ?  
O346 Na10 K3 132.0(12) . 1\_455 ?  
O377 Na10 K3 72.8(9) . 1\_455 ?  
O210 Na10 K3 45.9(7) . 1\_455 ?  
O2 Na10 K3 120.2(11) 1\_455 1\_455 ?  
O322 Na11 Na3 106.4(11) . . ?  
O322 Na11 O60 116.9(12) . 2 ?  
Na3 Na11 O60 110.2(8) . 2 ?  
O322 Na11 O137 110.4(11) . . ?  
Na3 Na11 O137 127.3(9) . . ?  
O60 Na11 O137 85.0(8) 2 . ?  
O248 Na12 Na15 66.0(6) . . ?  
O335 Na13 O282 65.9(13) . . ?  
O335 Na13 O373 138.0(16) . 1\_545 ?  
O282 Na13 O373 156.1(14) . 1\_545 ?  
O335 Na13 O199 61.3(13) . 1\_545 ?  
O282 Na13 O199 126.6(13) . 1\_545 ?  
O373 Na13 O199 77.1(10) 1\_545 1\_545 ?  
O360 Na15 O386 73(2) . . ?  
O360 Na15 O368 132.6(14) . . ?  
O386 Na15 O368 147.2(19) . . ?  
O360 Na15 Na12 141.0(14) . . ?

O386 Na15 Na12 87.3(19) . . ?  
O368 Na15 Na12 80.8(6) . . ?  
O240 Na16 O263 80.1(7) . 2\_546 ?  
O240 Na16 O308 135.2(8) . 2\_546 ?  
O263 Na16 O308 73.9(6) 2\_546 2\_546 ?  
O240 Na16 O234 162.0(7) . 2\_546 ?  
O263 Na16 O234 95.8(6) 2\_546 2\_546 ?  
O308 Na16 O234 58.3(6) 2\_546 2\_546 ?  
O240 Na16 O169 133.2(6) . 2\_546 ?  
O263 Na16 O169 134.5(7) 2\_546 2\_546 ?  
O308 Na16 O169 60.6(5) 2\_546 2\_546 ?  
O234 Na16 O169 61.0(5) 2\_546 2\_546 ?  
O240 Na16 O232 79.0(7) . 2\_546 ?  
O263 Na16 O232 144.4(8) 2\_546 2\_546 ?  
O308 Na16 O232 101.9(6) 2\_546 2\_546 ?  
O234 Na16 O232 112.3(6) 2\_546 2\_546 ?  
O169 Na16 O232 54.5(6) 2\_546 2\_546 ?  
O240 Na16 W61 135.9(6) . 2\_546 ?  
O263 Na16 W61 107.3(5) 2\_546 2\_546 ?  
O308 Na16 W61 34.3(4) 2\_546 2\_546 ?  
O234 Na16 W61 62.1(4) 2\_546 2\_546 ?  
O169 Na16 W61 28.0(4) 2\_546 2\_546 ?  
O232 Na16 W61 70.3(4) 2\_546 2\_546 ?  
O240 Na16 Eu6 109.1(5) . 2\_546 ?  
O263 Na16 Eu6 169.6(5) 2\_546 2\_546 ?  
O308 Na16 Eu6 95.8(4) 2\_546 2\_546 ?  
O234 Na16 Eu6 76.8(4) 2\_546 2\_546 ?  
O169 Na16 Eu6 35.3(4) 2\_546 2\_546 ?  
O232 Na16 Eu6 38.4(5) 2\_546 2\_546 ?  
W61 Na16 Eu6 62.81(13) 2\_546 2\_546 ?  
O218 Na17 O358 69.1(11) . 1\_455 ?  
O218 Na17 O22 145.2(8) . 1\_455 ?  
O358 Na17 O22 76.2(11) 1\_455 1\_455 ?  
O218 Na17 O15 130.1(7) . 1\_455 ?  
O358 Na17 O15 104.0(10) 1\_455 1\_455 ?  
O22 Na17 O15 56.1(6) 1\_455 1\_455 ?  
O218 Na17 O397 79.0(9) . . ?  
O358 Na17 O397 126.1(12) 1\_455 . ?  
O22 Na17 O397 126.2(9) 1\_455 . ?  
O15 Na17 O397 129.6(8) 1\_455 . ?  
O218 Na17 O11 148.7(8) . 1\_455 ?  
O358 Na17 O11 142.1(11) 1\_455 1\_455 ?  
O22 Na17 O11 65.9(6) 1\_455 1\_455 ?  
O15 Na17 O11 54.0(6) 1\_455 1\_455 ?  
O397 Na17 O11 80.0(8) . 1\_455 ?  
O218 Na17 O16 137.8(7) . 1\_455 ?  
O358 Na17 O16 104.3(11) 1\_455 1\_455 ?  
O22 Na17 O16 54.1(6) 1\_455 1\_455 ?  
O15 Na17 O16 92.1(6) 1\_455 1\_455 ?  
O397 Na17 O16 72.2(8) . 1\_455 ?  
O11 Na17 O16 53.4(6) 1\_455 1\_455 ?  
O354 Na19 O86 63.4(7) . 1\_565 ?  
Na5 K3 O5 72.1(5) . . ?  
Na5 K3 O129 101.1(5) . 1\_655 ?  
O5 K3 O129 167.9(5) . 1\_655 ?  
Na5 K3 O210 57.3(5) . 1\_655 ?  
O5 K3 O210 78.1(6) . 1\_655 ?  
O129 K3 O210 107.0(6) 1\_655 1\_655 ?  
Na5 K3 O385 78.0(12) . . ?  
O5 K3 O385 64.2(12) . . ?  
O129 K3 O385 105.0(12) 1\_655 . ?  
O210 K3 O385 128.7(12) 1\_655 . ?  
Na5 K3 O319 135.2(10) . 1\_655 ?  
O5 K3 O319 110.7(11) . 1\_655 ?

O129 K3 O319 66.8(11) 1\_655 1\_655 ?  
O210 K3 O319 165.8(10) 1\_655 1\_655 ?  
O385 K3 O319 65.4(14) . 1\_655 ?  
Na5 K3 O140 57.6(4) . 1\_655 ?  
O5 K3 O140 115.6(5) . 1\_655 ?  
O129 K3 O140 53.0(5) 1\_655 1\_655 ?  
O210 K3 O140 102.2(6) 1\_655 1\_655 ?  
O385 K3 O140 68.1(12) . 1\_655 ?  
O319 K3 O140 84.3(10) 1\_655 1\_655 ?  
Na5 K3 O209 107.3(5) . 1\_655 ?  
O5 K3 O209 87.2(6) . 1\_655 ?  
O129 K3 O209 104.5(5) 1\_655 1\_655 ?  
O210 K3 O209 50.3(6) 1\_655 1\_655 ?  
O385 K3 O209 148.3(12) . 1\_655 ?  
O319 K3 O209 117.4(10) 1\_655 1\_655 ?  
O140 K3 O209 141.7(6) 1\_655 1\_655 ?  
Na5 K3 W54 82.3(3) . 1\_655 ?  
O5 K3 W54 93.6(4) . 1\_655 ?  
O129 K3 W54 95.3(4) 1\_655 1\_655 ?  
O210 K3 W54 26.5(4) 1\_655 1\_655 ?  
O385 K3 W54 154.0(11) . 1\_655 ?  
O319 K3 W54 139.4(9) 1\_655 1\_655 ?  
O140 K3 W54 114.6(4) 1\_655 1\_655 ?  
O209 K3 W54 29.2(4) 1\_655 1\_655 ?  
Na5 K3 W35 83.7(3) . 1\_655 ?  
O5 K3 W35 142.4(4) . 1\_655 ?  
O129 K3 W35 25.6(3) 1\_655 1\_655 ?  
O210 K3 W35 112.6(5) 1\_655 1\_655 ?  
O385 K3 W35 83.2(11) . 1\_655 ?  
O319 K3 W35 67.7(10) 1\_655 1\_655 ?  
O140 K3 W35 28.7(3) 1\_655 1\_655 ?  
O209 K3 W35 128.1(4) 1\_655 1\_655 ?  
W54 K3 W35 111.49(15) 1\_655 1\_655 ?  
Na5 K3 W55 136.3(3) . 1\_655 ?  
O5 K3 W55 100.6(4) . 1\_655 ?  
O129 K3 W55 91.2(4) 1\_655 1\_655 ?  
O210 K3 W55 79.0(4) 1\_655 1\_655 ?  
O385 K3 W55 138.9(12) . 1\_655 ?  
O319 K3 W55 88.2(9) 1\_655 1\_655 ?  
O140 K3 W55 143.3(4) 1\_655 1\_655 ?  
O209 K3 W55 29.4(4) 1\_655 1\_655 ?  
W54 K3 W55 54.67(8) 1\_655 1\_655 ?  
W35 K3 W55 116.59(14) 1\_655 1\_655 ?  
Na5 K3 Na10 25.7(5) . 1\_655 ?  
O5 K3 Na10 83.2(6) . 1\_655 ?  
O129 K3 Na10 94.7(5) 1\_655 1\_655 ?  
O210 K3 Na10 35.3(6) 1\_655 1\_655 ?  
O385 K3 Na10 103.7(12) . 1\_655 ?  
O319 K3 Na10 153.1(10) 1\_655 1\_655 ?  
O140 K3 Na10 68.8(5) 1\_655 1\_655 ?  
O209 K3 Na10 85.1(5) 1\_655 1\_655 ?  
W54 K3 Na10 57.8(4) 1\_655 1\_655 ?  
W35 K3 Na10 87.1(4) 1\_655 1\_655 ?  
W55 K3 Na10 112.5(4) 1\_655 1\_655 ?  
O26 As1 O25 98.1(10) . . ?  
O26 As1 O27 99.7(9) . . ?  
O25 As1 O27 96.5(9) . . ?  
O47 As2 O48 96.3(8) . . ?  
O47 As2 O49 95.9(9) . . ?  
O48 As2 O49 100.2(9) . . ?  
O100 As3 O101 95.3(8) . . ?  
O100 As3 O102 98.3(8) . . ?  
O101 As3 O102 96.3(8) . . ?  
O143 As4 O142 98.2(8) . . ?

O143 As4 O141 98.9(9) . . ?  
O142 As4 O141 95.5(8) . . ?  
O174 As5 O176 97.4(8) . . ?  
O174 As5 O175 97.5(8) . . ?  
O176 As5 O175 97.8(8) . . ?  
O215 As6 O214 98.6(9) . . ?  
O215 As6 O216 99.3(10) . . ?  
O214 As6 O216 97.6(10) . . ?  
O362 As7 O361 100.3(9) . . ?  
O362 As7 O363 97.0(9) . . ?  
O361 As7 O363 98.2(9) . . ?  
O289 As8 O287 96.0(9) . . ?  
O289 As8 O288 100.3(9) . . ?  
O287 As8 O288 95.2(10) . . ?  
O58 Cs1 O79 63.8(5) . . ?  
O58 Cs1 O121 133.0(5) . . ?  
O79 Cs1 O121 80.0(5) . . ?  
O58 Cs1 O66 118.5(5) . 2 ?  
O79 Cs1 O66 129.4(5) . 2 ?  
O121 Cs1 O66 107.4(5) . 2 ?  
O58 Cs1 O56 98.6(5) . . ?  
O79 Cs1 O56 119.8(5) . . ?  
O121 Cs1 O56 73.4(5) . . ?  
O66 Cs1 O56 110.0(5) 2 . ?  
O58 Cs1 O45 51.1(5) . . ?  
O79 Cs1 O45 103.6(5) . . ?  
O121 Cs1 O45 117.5(4) . . ?  
O66 Cs1 O45 114.9(4) 2 . ?  
O56 Cs1 O45 50.4(5) . . ?  
O58 Cs1 O324 77.8(3) . . ?  
O79 Cs1 O324 140.5(3) . . ?  
O121 Cs1 O324 137.5(3) . . ?  
O66 Cs1 O324 61.4(3) 2 . ?  
O56 Cs1 O324 73.4(4) . . ?  
O45 Cs1 O324 53.6(3) . . ?  
O58 Cs1 O70 160.5(5) . 2 ?  
O79 Cs1 O70 135.2(5) . 2 ?  
O121 Cs1 O70 63.9(5) . 2 ?  
O66 Cs1 O70 49.6(5) 2 2 ?  
O56 Cs1 O70 75.7(5) . 2 ?  
O45 Cs1 O70 115.9(4) . 2 ?  
O324 Cs1 O70 82.7(3) . 2 ?  
O58 Cs1 O69 84.0(5) . 2 ?  
O79 Cs1 O69 81.4(5) . 2 ?  
O121 Cs1 O69 120.6(5) . 2 ?  
O66 Cs1 O69 51.2(5) 2 2 ?  
O56 Cs1 O69 157.7(6) . 2 ?  
O45 Cs1 O69 121.5(5) . 2 ?  
O324 Cs1 O69 85.6(4) . 2 ?  
O70 Cs1 O69 94.5(5) 2 2 ?  
O58 Cs1 O326 119.6(8) . . ?  
O79 Cs1 O326 67.3(8) . . ?  
O121 Cs1 O326 65.7(7) . . ?  
O66 Cs1 O326 70.9(7) 2 . ?  
O56 Cs1 O326 136.6(8) . . ?  
O45 Cs1 O326 170.2(8) . . ?  
O324 Cs1 O326 131.2(6) . . ?  
O70 Cs1 O326 73.9(8) 2 . ?  
O69 Cs1 O326 55.1(7) 2 . ?  
O58 Cs1 O110 59.0(4) . . ?  
O79 Cs1 O110 51.4(4) . . ?  
O121 Cs1 O110 75.2(4) . . ?  
O66 Cs1 O110 177.2(4) 2 . ?  
O56 Cs1 O110 69.7(5) . . ?

O45 Cs1 O110 62.7(4) . . ?  
O324 Cs1 O110 116.1(2) . . ?  
O70 Cs1 O110 132.3(4) 2 . ?  
O69 Cs1 O110 128.4(5) 2 . ?  
O326 Cs1 O110 111.3(7) . . ?  
O58 Cs1 W13 23.3(3) . . ?  
O79 Cs1 W13 82.1(3) . . ?  
O121 Cs1 W13 130.6(3) . . ?  
O66 Cs1 W13 119.5(3) 2 . ?  
O56 Cs1 W13 76.6(4) . . ?  
O45 Cs1 W13 27.7(3) . . ?  
O324 Cs1 W13 64.16(4) . . ?  
O70 Cs1 W13 141.6(3) 2 . ?  
O69 Cs1 W13 101.4(4) 2 . ?  
O326 Cs1 W13 142.9(7) . . ?  
O110 Cs1 W13 57.8(2) . . ?  
O37 Cs2 O113 172.1(6) . . ?  
O37 Cs2 O109 94.6(6) . . ?  
O113 Cs2 O109 91.7(5) . . ?  
O37 Cs2 O157 84.3(6) . . ?  
O113 Cs2 O157 96.3(5) . . ?  
O109 Cs2 O157 49.5(4) . . ?  
O37 Cs2 O160 131.1(5) . . ?  
O113 Cs2 O160 53.0(4) . . ?  
O109 Cs2 O160 93.8(4) . . ?  
O157 Cs2 O160 134.3(5) . . ?  
O37 Cs2 O76 61.5(6) . . ?  
O113 Cs2 O76 123.8(5) . . ?  
O109 Cs2 O76 86.3(5) . . ?  
O157 Cs2 O76 122.3(5) . . ?  
O160 Cs2 O76 71.1(5) . . ?  
O37 Cs2 O93 74.5(5) . . ?  
O113 Cs2 O93 100.0(4) . . ?  
O109 Cs2 O93 97.4(4) . . ?  
O157 Cs2 O93 48.1(4) . . ?  
O160 Cs2 O93 151.1(4) . . ?  
O76 Cs2 O93 135.9(5) . . ?  
O37 Cs2 O179 127.3(6) . . ?  
O113 Cs2 O179 49.2(5) . . ?  
O109 Cs2 O179 132.6(5) . . ?  
O157 Cs2 O179 141.1(4) . . ?  
O160 Cs2 O179 43.7(4) . . ?  
O76 Cs2 O179 94.9(5) . . ?  
O93 Cs2 O179 112.9(4) . . ?  
O37 Cs2 O359 74.5(11) . . ?  
O113 Cs2 O359 98.3(11) . . ?  
O109 Cs2 O359 164.6(11) . . ?  
O157 Cs2 O359 117.3(11) . . ?  
O160 Cs2 O359 101.6(11) . . ?  
O76 Cs2 O359 97.6(11) . . ?  
O93 Cs2 O359 69.4(10) . . ?  
O179 Cs2 O359 62.1(11) . . ?  
O37 Cs2 O91 118.8(5) . . ?  
O113 Cs2 O91 56.0(4) . . ?  
O109 Cs2 O91 92.8(4) . . ?  
O157 Cs2 O91 57.1(4) . . ?  
O160 Cs2 O91 108.8(4) . . ?  
O76 Cs2 O91 179.1(5) . . ?  
O93 Cs2 O91 44.3(4) . . ?  
O179 Cs2 O91 85.6(4) . . ?  
O359 Cs2 O91 83.3(11) . . ?  
O37 Cs2 O72 47.5(6) . . ?  
O113 Cs2 O72 137.9(5) . . ?  
O109 Cs2 O72 47.6(4) . . ?

O157 Cs2 O72 51.8(4) . . ?  
O160 Cs2 O72 126.9(4) . . ?  
O76 Cs2 O72 71.5(4) . . ?  
O93 Cs2 O72 79.0(4) . . ?  
O179 Cs2 O72 166.4(4) . . ?  
O359 Cs2 O72 119.6(11) . . ?  
O91 Cs2 O72 108.0(4) . . ?  
O37 Cs2 O111 126.8(5) . . ?  
O113 Cs2 O111 55.7(4) . . ?  
O109 Cs2 O111 46.7(4) . . ?  
O157 Cs2 O111 43.8(4) . . ?  
O160 Cs2 O111 92.4(4) . . ?  
O76 Cs2 O111 129.9(5) . . ?  
O93 Cs2 O111 76.6(4) . . ?  
O179 Cs2 O111 104.8(4) . . ?  
O359 Cs2 O111 132.4(10) . . ?  
O91 Cs2 O111 49.3(4) . . ?  
O72 Cs2 O111 83.9(4) . . ?  
O131 Cs3 O192 69.1(4) . . ?  
O131 Cs3 O163 132.2(5) . . ?  
O192 Cs3 O163 90.3(4) . . ?  
O131 Cs3 O156 78.6(5) . . ?  
O192 Cs3 O156 91.6(4) . . ?  
O163 Cs3 O156 147.0(5) . . ?  
O131 Cs3 O307 77.3(5) . . ?  
O192 Cs3 O307 77.8(4) . . ?  
O163 Cs3 O307 55.9(5) . . ?  
O156 Cs3 O307 155.8(5) . . ?  
O131 Cs3 O304 124.1(5) . . ?  
O192 Cs3 O304 166.8(5) . . ?  
O163 Cs3 O304 79.7(5) . . ?  
O156 Cs3 O304 92.3(5) . . ?  
O307 Cs3 O304 103.1(5) . . ?  
O131 Cs3 O162 168.2(4) . . ?  
O192 Cs3 O162 99.8(4) . . ?  
O163 Cs3 O162 48.9(5) . . ?  
O156 Cs3 O162 98.4(5) . . ?  
O307 Cs3 O162 104.8(4) . . ?  
O304 Cs3 O162 67.2(5) . . ?  
O131 Cs3 O306 90.7(5) . . ?  
O192 Cs3 O306 128.6(5) . . ?  
O163 Cs3 O306 68.7(5) . . ?  
O156 Cs3 O306 131.5(5) . . ?  
O307 Cs3 O306 51.3(5) . . ?  
O304 Cs3 O306 55.4(6) . . ?  
O162 Cs3 O306 99.7(5) . . ?  
O131 Cs3 O115 90.3(4) . . ?  
O192 Cs3 O115 50.4(4) . . ?  
O163 Cs3 O115 109.4(4) . . ?  
O156 Cs3 O115 50.4(4) . . ?  
O307 Cs3 O115 127.3(4) . . ?  
O304 Cs3 O115 125.1(5) . . ?  
O162 Cs3 O115 79.2(4) . . ?  
O306 Cs3 O115 178.1(4) . . ?  
O131 Cs3 O305 80.2(5) . . ?  
O192 Cs3 O305 143.1(5) . . ?  
O163 Cs3 O305 126.2(5) . . ?  
O156 Cs3 O305 61.8(5) . . ?  
O307 Cs3 O305 115.6(5) . . ?  
O304 Cs3 O305 48.6(6) . . ?  
O162 Cs3 O305 108.6(5) . . ?  
O306 Cs3 O305 69.8(5) . . ?  
O115 Cs3 O305 112.1(5) . . ?  
O131 Cs3 O112 130.3(4) . . ?

O192 Cs3 O112 112.9(4) . . ?  
O163 Cs3 O112 97.3(5) . . ?  
O156 Cs3 O112 52.1(5) . . ?  
O307 Cs3 O112 152.1(5) . . ?  
O304 Cs3 O112 60.6(5) . . ?  
O162 Cs3 O112 49.3(4) . . ?  
O306 Cs3 O112 115.9(5) . . ?  
O115 Cs3 O112 64.6(4) . . ?  
O305 Cs3 O112 72.1(5) . . ?  
O131 Cs3 O161 122.5(4) . . ?  
O192 Cs3 O161 53.5(4) . . ?  
O163 Cs3 O161 56.6(4) . . ?  
O156 Cs3 O161 99.4(4) . . ?  
O307 Cs3 O161 91.7(4) . . ?  
O304 Cs3 O161 113.4(5) . . ?  
O162 Cs3 O161 46.3(4) . . ?  
O306 Cs3 O161 125.2(4) . . ?  
O115 Cs3 O161 52.9(4) . . ?  
O305 Cs3 O161 148.9(5) . . ?  
O112 Cs3 O161 76.8(4) . . ?  
O34 Eu1 O28 75.6(6) . . ?  
O34 Eu1 O77 139.9(7) . . ?  
O28 Eu1 O77 144.4(6) . . ?  
O34 Eu1 O29 108.3(6) . . ?  
O28 Eu1 O29 72.6(7) . . ?  
O77 Eu1 O29 91.9(6) . . ?  
O34 Eu1 O36 87.6(6) . . ?  
O28 Eu1 O36 80.5(7) . . ?  
O77 Eu1 O36 96.3(6) . . ?  
O29 Eu1 O36 143.5(7) . . ?  
O34 Eu1 O38 146.0(6) . . ?  
O28 Eu1 O38 75.0(7) . . ?  
O77 Eu1 O38 70.6(7) . . ?  
O29 Eu1 O38 78.3(7) . . ?  
O36 Eu1 O38 71.2(7) . . ?  
O34 Eu1 O37 74.4(7) . . ?  
O28 Eu1 O37 123.5(7) . . ?  
O77 Eu1 O37 79.2(7) . . ?  
O29 Eu1 O37 73.1(8) . . ?  
O36 Eu1 O37 143.4(8) . . ?  
O38 Eu1 O37 137.3(7) . . ?  
O34 Eu1 O72 73.3(6) . . ?  
O28 Eu1 O72 141.5(6) . . ?  
O77 Eu1 O72 69.1(6) . . ?  
O29 Eu1 O72 139.2(6) . . ?  
O36 Eu1 O72 76.2(6) . . ?  
O38 Eu1 O72 123.9(7) . . ?  
O37 Eu1 O72 68.2(7) . . ?  
O34 Eu1 Cs2 85.3(4) . . ?  
O28 Eu1 Cs2 150.9(5) . . ?  
O77 Eu1 Cs2 58.5(4) . . ?  
O29 Eu1 Cs2 93.5(5) . . ?  
O36 Eu1 Cs2 120.9(5) . . ?  
O38 Eu1 Cs2 128.2(5) . . ?  
O37 Eu1 Cs2 28.2(6) . . ?  
O72 Eu1 Cs2 45.7(4) . . ?  
O35 Eu2 O73 69.1(6) . . ?  
O35 Eu2 O53 114.2(6) . . ?  
O73 Eu2 O53 78.7(6) . . ?  
O35 Eu2 O52 75.9(7) . . ?  
O73 Eu2 O52 119.1(6) . . ?  
O53 Eu2 O52 72.4(7) . . ?  
O35 Eu2 O74 136.2(6) . . ?  
O73 Eu2 O74 154.5(7) . . ?

O53 Eu2 O74 85.4(6) . . ?  
O52 Eu2 O74 73.7(6) . . ?  
O35 Eu2 O158 143.9(6) . . ?  
O73 Eu2 O158 82.6(6) . . ?  
O53 Eu2 O158 80.0(6) . . ?  
O52 Eu2 O158 139.4(7) . . ?  
O74 Eu2 O158 75.0(6) . . ?  
O35 Eu2 O75 70.5(7) . . ?  
O73 Eu2 O75 129.6(7) . . ?  
O53 Eu2 O75 146.8(7) . . ?  
O52 Eu2 O75 77.6(7) . . ?  
O74 Eu2 O75 72.7(7) . . ?  
O158 Eu2 O75 116.4(7) . . ?  
O35 Eu2 O76 77.8(7) . . ?  
O73 Eu2 O76 74.6(7) . . ?  
O53 Eu2 O76 144.1(7) . . ?  
O52 Eu2 O76 142.3(7) . . ?  
O74 Eu2 O76 109.6(7) . . ?  
O158 Eu2 O76 73.3(7) . . ?  
O75 Eu2 O76 68.5(7) . . ?  
O35 Eu2 Na1 125.1(5) . . ?  
O73 Eu2 Na1 56.8(5) . . ?  
O53 Eu2 Na1 49.7(4) . . ?  
O52 Eu2 Na1 122.0(5) . . ?  
O74 Eu2 Na1 97.8(5) . . ?  
O158 Eu2 Na1 39.5(5) . . ?  
O75 Eu2 Na1 155.7(5) . . ?  
O76 Eu2 Na1 95.2(5) . . ?  
O114 Eu3 O111 69.4(6) . . ?  
O114 Eu3 O88 75.0(6) . . ?  
O111 Eu3 O88 120.4(6) . . ?  
O114 Eu3 O91 110.7(6) . . ?  
O111 Eu3 O91 80.1(6) . . ?  
O88 Eu3 O91 69.8(6) . . ?  
O114 Eu3 O115 85.4(6) . . ?  
O111 Eu3 O115 83.1(6) . . ?  
O88 Eu3 O115 139.6(6) . . ?  
O91 Eu3 O115 150.6(5) . . ?  
O114 Eu3 O112 140.4(6) . . ?  
O111 Eu3 O112 150.1(6) . . ?  
O88 Eu3 O112 76.8(6) . . ?  
O91 Eu3 O112 84.5(6) . . ?  
O115 Eu3 O112 98.8(6) . . ?  
O114 Eu3 O113 147.1(6) . . ?  
O111 Eu3 O113 83.5(5) . . ?  
O88 Eu3 O113 136.9(6) . . ?  
O91 Eu3 O113 81.3(6) . . ?  
O115 Eu3 O113 72.9(6) . . ?  
O112 Eu3 O113 68.9(6) . . ?  
O114 Eu3 O156 72.2(6) . . ?  
O111 Eu3 O156 133.3(6) . . ?  
O88 Eu3 O156 72.3(6) . . ?  
O91 Eu3 O156 139.4(6) . . ?  
O115 Eu3 O156 68.1(6) . . ?  
O112 Eu3 O156 73.1(6) . . ?  
O113 Eu3 O156 119.1(6) . . ?  
O114 Eu3 Cs3 110.0(5) . . ?  
O111 Eu3 Cs3 130.7(4) . . ?  
O88 Eu3 Cs3 105.7(4) . . ?  
O91 Eu3 Cs3 135.9(4) . . ?  
O115 Eu3 Cs3 48.7(4) . . ?  
O112 Eu3 Cs3 52.9(5) . . ?  
O113 Eu3 Cs3 73.7(4) . . ?  
O156 Eu3 Cs3 45.5(4) . . ?



O114 Eu3 Cs2 123.7(4) . . ?  
O111 Eu3 Cs2 55.5(4) . . ?  
O88 Eu3 Cs2 122.4(4) . . ?  
O91 Eu3 Cs2 52.6(4) . . ?  
O115 Eu3 Cs2 97.9(4) . . ?  
O112 Eu3 Cs2 94.9(5) . . ?  
O113 Eu3 Cs2 40.1(4) . . ?  
O156 Eu3 Cs2 159.2(4) . . ?  
Cs3 Eu3 Cs2 113.73(5) . . ?  
O117 Eu4 O123 110.7(7) . . ?  
O117 Eu4 O124 73.2(7) . . ?  
O123 Eu4 O124 70.3(7) . . ?  
O117 Eu4 O118 69.3(6) . . ?  
O123 Eu4 O118 78.5(7) . . ?  
O124 Eu4 O118 117.4(6) . . ?  
O117 Eu4 O120 80.8(6) . . ?  
O123 Eu4 O120 150.0(6) . . ?  
O124 Eu4 O120 139.2(6) . . ?  
O118 Eu4 O120 80.3(6) . . ?  
O117 Eu4 O116 141.2(6) . . ?  
O123 Eu4 O116 75.0(7) . . ?  
O124 Eu4 O116 139.1(7) . . ?  
O118 Eu4 O116 74.8(6) . . ?  
O120 Eu4 O116 79.1(6) . . ?  
O117 Eu4 O122 142.7(6) . . ?  
O123 Eu4 O122 76.7(7) . . ?  
O124 Eu4 O122 75.7(6) . . ?  
O118 Eu4 O122 145.5(6) . . ?  
O120 Eu4 O122 111.5(6) . . ?  
O116 Eu4 O122 75.9(6) . . ?  
O117 Eu4 O121 71.6(6) . . ?  
O123 Eu4 O121 141.2(7) . . ?  
O124 Eu4 O121 73.9(7) . . ?  
O118 Eu4 O121 132.8(6) . . ?  
O120 Eu4 O121 68.2(6) . . ?  
O116 Eu4 O121 128.6(6) . . ?  
O122 Eu4 O121 80.5(6) . . ?  
O117 Eu4 Cs1 103.6(5) . . ?  
O123 Eu4 Cs1 135.5(5) . . ?  
O124 Eu4 Cs1 94.4(5) . . ?  
O118 Eu4 Cs1 141.8(5) . . ?  
O120 Eu4 Cs1 61.5(4) . . ?  
O116 Eu4 Cs1 95.5(4) . . ?  
O122 Eu4 Cs1 58.9(5) . . ?  
O121 Eu4 Cs1 34.2(4) . . ?  
O193 Eu5 O194 147.2(6) . . ?  
O193 Eu5 O161 111.8(7) . . ?  
O194 Eu5 O161 80.0(6) . . ?  
O193 Eu5 O190 72.1(6) . . ?  
O194 Eu5 O190 140.7(6) . . ?  
O161 Eu5 O190 81.9(6) . . ?  
O193 Eu5 O192 147.2(6) . . ?  
O194 Eu5 O192 63.2(5) . . ?  
O161 Eu5 O192 78.7(6) . . ?  
O190 Eu5 O192 79.3(6) . . ?  
O193 Eu5 O159 74.7(6) . . ?  
O194 Eu5 O159 81.8(6) . . ?  
O161 Eu5 O159 69.7(6) . . ?  
O190 Eu5 O159 123.3(6) . . ?  
O192 Eu5 O159 136.2(6) . . ?  
O193 Eu5 O191 82.6(7) . . ?  
O194 Eu5 O191 101.4(6) . . ?  
O161 Eu5 O191 151.5(6) . . ?  
O190 Eu5 O191 79.6(6) . . ?

O192 Eu5 O191 76.8(6) . . ?  
O159 Eu5 O191 138.8(6) . . ?  
O193 Eu5 O189 74.1(6) . . ?  
O194 Eu5 O189 77.3(6) . . ?  
O161 Eu5 O189 138.1(6) . . ?  
O190 Eu5 O189 135.6(6) . . ?  
O192 Eu5 O189 119.8(6) . . ?  
O159 Eu5 O189 72.5(7) . . ?  
O191 Eu5 O189 68.3(6) . . ?  
O193 Eu5 W41 173.7(5) . . ?  
O194 Eu5 W41 30.4(4) . . ?  
O161 Eu5 W41 74.5(4) . . ?  
O190 Eu5 W41 110.7(4) . . ?  
O192 Eu5 W41 33.0(4) . . ?  
O159 Eu5 W41 107.3(4) . . ?  
O191 Eu5 W41 92.2(5) . . ?  
O189 Eu5 W41 100.6(4) . . ?  
O193 Eu5 Cs3 126.8(4) . . ?  
O194 Eu5 Cs3 84.6(4) . . ?  
O161 Eu5 Cs3 50.1(4) . . ?  
O190 Eu5 Cs3 57.2(4) . . ?  
O192 Eu5 Cs3 37.2(4) . . ?  
O159 Eu5 Cs3 119.6(5) . . ?  
O191 Eu5 Cs3 101.5(4) . . ?  
O189 Eu5 Cs3 156.7(4) . . ?  
W41 Eu5 Cs3 57.74(3) . . ?  
O195 Eu6 O201 77.0(7) . . ?  
O195 Eu6 O169 81.9(6) . . ?  
O201 Eu6 O169 140.8(8) . . ?  
O195 Eu6 O204 107.7(7) . . ?  
O201 Eu6 O204 72.6(7) . . ?  
O169 Eu6 O204 146.1(7) . . ?  
O195 Eu6 O231 142.1(6) . . ?  
O201 Eu6 O231 139.5(7) . . ?  
O169 Eu6 O231 72.1(7) . . ?  
O204 Eu6 O231 82.0(7) . . ?  
O195 Eu6 O230 144.4(8) . . ?  
O201 Eu6 O230 80.3(7) . . ?  
O169 Eu6 O230 99.5(7) . . ?  
O204 Eu6 O230 90.9(8) . . ?  
O231 Eu6 O230 68.8(7) . . ?  
O195 Eu6 O229 73.4(7) . . ?  
O201 Eu6 O229 126.0(7) . . ?  
O169 Eu6 O229 77.2(7) . . ?  
O204 Eu6 O229 74.9(7) . . ?  
O231 Eu6 O229 74.2(7) . . ?  
O230 Eu6 O229 141.9(8) . . ?  
O195 Eu6 O232 75.9(7) . . ?  
O201 Eu6 O232 74.7(8) . . ?  
O169 Eu6 O232 68.3(7) . . ?  
O204 Eu6 O232 145.1(7) . . ?  
O231 Eu6 O232 117.0(7) . . ?  
O230 Eu6 O232 71.8(8) . . ?  
O229 Eu6 O232 136.3(7) . . ?  
O195 Eu6 Na16 111.6(5) . 2\_546 ?  
O201 Eu6 Na16 112.8(6) . 2\_546 ?  
O169 Eu6 Na16 46.9(4) . 2\_546 ?  
O204 Eu6 Na16 140.5(5) . 2\_546 ?  
O231 Eu6 Na16 69.3(5) . 2\_546 ?  
O230 Eu6 Na16 54.1(6) . 2\_546 ?  
O229 Eu6 Na16 119.7(5) . 2\_546 ?  
O232 Eu6 Na16 47.8(5) . 2\_546 ?  
O261 Eu7 O237 142.8(7) . 2\_546 ?  
O261 Eu7 O239 72.7(7) . . ?

O237 Eu7 O239 81.9(7) 2\_546 . ?  
O261 Eu7 O262 70.3(7) . . ?  
O237 Eu7 O262 146.9(7) 2\_546 . ?  
O239 Eu7 O262 120.0(7) . . ?  
O261 Eu7 O236 113.6(7) . . ?  
O237 Eu7 O236 81.8(7) 2\_546 . ?  
O239 Eu7 O236 70.9(7) . . ?  
O262 Eu7 O236 82.8(6) . . ?  
O261 Eu7 O265 86.8(7) . . ?  
O237 Eu7 O265 97.7(7) 2\_546 . ?  
O239 Eu7 O265 142.0(7) . . ?  
O262 Eu7 O265 80.0(7) . . ?  
O236 Eu7 O265 146.9(6) . . ?  
O261 Eu7 O263 141.1(7) . . ?  
O237 Eu7 O263 73.9(7) 2\_546 . ?  
O239 Eu7 O263 141.5(7) . . ?  
O262 Eu7 O263 74.2(7) . . ?  
O236 Eu7 O263 76.4(7) . . ?  
O265 Eu7 O263 71.9(7) . . ?  
O261 Eu7 O264 72.6(7) . . ?  
O237 Eu7 O264 74.5(7) 2\_546 . ?  
O239 Eu7 O264 74.0(7) . . ?  
O262 Eu7 O264 132.7(7) . . ?  
O236 Eu7 O264 139.8(7) . . ?  
O265 Eu7 O264 69.5(7) . . ?  
O263 Eu7 O264 125.1(8) . . ?  
O302 Eu8 O272 72.2(8) . . ?  
O302 Eu8 O305 143.7(8) . . ?  
O272 Eu8 O305 144.1(8) . . ?  
O302 Eu8 O278 76.3(6) . . ?  
O272 Eu8 O278 123.4(7) . . ?  
O305 Eu8 O278 79.9(7) . . ?  
O302 Eu8 O275 111.8(7) . . ?  
O272 Eu8 O275 79.4(7) . . ?  
O305 Eu8 O275 85.0(7) . . ?  
O278 Eu8 O275 70.4(6) . . ?  
O302 Eu8 O304 145.7(7) . . ?  
O272 Eu8 O304 75.4(8) . . ?  
O305 Eu8 O304 69.0(8) . . ?  
O278 Eu8 O304 133.0(7) . . ?  
O275 Eu8 O304 72.4(7) . . ?  
O302 Eu8 O303 77.4(8) . . ?  
O272 Eu8 O303 136.1(8) . . ?  
O305 Eu8 O303 70.8(8) . . ?  
O278 Eu8 O303 77.2(7) . . ?  
O275 Eu8 O303 142.4(7) . . ?  
O304 Eu8 O303 121.2(8) . . ?  
O302 Eu8 O306 84.4(7) . . ?  
O272 Eu8 O306 73.2(8) . . ?  
O305 Eu8 O306 102.2(7) . . ?  
O278 Eu8 O306 147.4(7) . . ?  
O275 Eu8 O306 141.9(7) . . ?  
O304 Eu8 O306 75.5(7) . . ?  
O303 Eu8 O306 73.1(7) . . ?  
O302 Eu8 Cs3 131.1(5) . . ?  
O272 Eu8 Cs3 105.3(6) . . ?  
O305 Eu8 Cs3 53.7(5) . . ?  
O278 Eu8 Cs3 130.6(4) . . ?  
O275 Eu8 Cs3 115.7(4) . . ?  
O304 Eu8 Cs3 49.2(6) . . ?  
O303 Eu8 Cs3 72.6(5) . . ?  
O306 Eu8 Cs3 50.5(4) . . ?  
O1 W1 O12 100.8(10) . . ?  
O1 W1 O13 100.3(10) . . ?

O12 W1 O13 158.6(9) . . ?  
O1 W1 O18 102.6(10) . . ?  
O12 W1 O18 90.1(8) . . ?  
O13 W1 O18 88.7(9) . . ?  
O1 W1 O10 99.7(10) . . ?  
O12 W1 O10 85.6(8) . . ?  
O13 W1 O10 87.5(8) . . ?  
O18 W1 O10 157.7(9) . . ?  
O1 W1 O27 171.5(9) . . ?  
O12 W1 O27 86.1(8) . . ?  
O13 W1 O27 73.2(8) . . ?  
O18 W1 O27 72.2(8) . . ?  
O10 W1 O27 85.7(8) . . ?  
O2 W2 O15 104.2(11) . . ?  
O2 W2 O14 100.9(11) . . ?  
O15 W2 O14 94.2(9) . . ?  
O2 W2 O10 99.7(11) . . ?  
O15 W2 O10 155.0(9) . . ?  
O14 W2 O10 88.5(8) . . ?  
O2 W2 O11 99.1(11) . . ?  
O15 W2 O11 86.5(8) . . ?  
O14 W2 O11 159.1(10) . . ?  
O10 W2 O11 82.4(8) . . ?  
O2 W2 O26 174.7(9) . . ?  
O15 W2 O26 73.4(8) . . ?  
O14 W2 O26 74.8(8) . . ?  
O10 W2 O26 83.4(8) . . ?  
O11 W2 O26 85.5(8) . . ?  
O3 W3 O16 100.0(10) . . ?  
O3 W3 O11 103.4(11) . . ?  
O16 W3 O11 94.6(9) . . ?  
O3 W3 O12 100.7(10) . . ?  
O16 W3 O12 158.5(9) . . ?  
O11 W3 O12 86.2(9) . . ?  
O3 W3 O17 96.0(10) . . ?  
O16 W3 O17 86.8(9) . . ?  
O11 W3 O17 159.9(9) . . ?  
O12 W3 O17 85.3(8) . . ?  
O3 W3 O25 167.1(10) . . ?  
O16 W3 O25 74.8(8) . . ?  
O11 W3 O25 88.9(9) . . ?  
O12 W3 O25 83.7(8) . . ?  
O17 W3 O25 72.1(8) . . ?  
O4 W4 O31 102.2(10) . . ?  
O4 W4 O22 102.1(9) . . ?  
O31 W4 O22 95.2(9) . . ?  
O4 W4 O23 99.5(9) . . ?  
O31 W4 O23 93.2(9) . . ?  
O22 W4 O23 154.6(8) . . ?  
O4 W4 O16 96.2(9) . . ?  
O31 W4 O16 161.7(8) . . ?  
O22 W4 O16 81.3(8) . . ?  
O23 W4 O16 83.2(8) . . ?  
O4 W4 O25 163.2(9) . . ?  
O31 W4 O25 93.0(9) . . ?  
O22 W4 O25 83.5(8) . . ?  
O23 W4 O25 72.1(8) . . ?  
O16 W4 O25 68.7(8) . . ?  
O5 W5 O30 105.5(10) . . ?  
O5 W5 O22 102.5(9) . . ?  
O30 W5 O22 94.1(9) . . ?  
O5 W5 O21 100.5(9) . . ?  
O30 W5 O21 91.7(9) . . ?  
O22 W5 O21 153.8(8) . . ?

O5 W5 O15 93.5(10) . . ?  
O30 W5 O15 160.8(8) . . ?  
O22 W5 O15 84.4(8) . . ?  
O21 W5 O15 81.8(8) . . ?  
O5 W5 O26 162.4(9) . . ?  
O30 W5 O26 90.3(8) . . ?  
O22 W5 O26 83.4(7) . . ?  
O21 W5 O26 71.0(7) . . ?  
O15 W5 O26 70.4(8) . . ?  
O6 W6 O29 103.6(9) . . ?  
O6 W6 O21 98.4(8) . . ?  
O29 W6 O21 94.3(8) . . ?  
O6 W6 O20 102.2(9) . . ?  
O29 W6 O20 93.1(9) . . ?  
O21 W6 O20 155.9(8) . . ?  
O6 W6 O14 94.8(9) . . ?  
O29 W6 O14 161.7(8) . . ?  
O21 W6 O14 83.1(8) . . ?  
O20 W6 O14 82.8(9) . . ?  
O6 W6 O26 166.3(9) . . ?  
O29 W6 O26 88.4(8) . . ?  
O21 W6 O26 73.8(7) . . ?  
O20 W6 O26 83.5(8) . . ?  
O14 W6 O26 73.4(8) . . ?  
O7 W7 O28 106.0(9) . . ?  
O7 W7 O20 101.1(9) . . ?  
O28 W7 O20 91.5(9) . . ?  
O7 W7 O19 97.4(8) . . ?  
O28 W7 O19 94.2(8) . . ?  
O20 W7 O19 158.3(8) . . ?  
O7 W7 O13 96.3(9) . . ?  
O28 W7 O13 157.7(8) . . ?  
O20 W7 O13 83.9(9) . . ?  
O19 W7 O13 82.9(8) . . ?  
O7 W7 O27 166.5(8) . . ?  
O28 W7 O27 85.4(8) . . ?  
O20 W7 O27 85.6(8) . . ?  
O19 W7 O27 74.0(7) . . ?  
O13 W7 O27 72.6(7) . . ?  
O8 W8 O33 102.1(10) . . ?  
O8 W8 O19 101.6(9) . . ?  
O33 W8 O19 96.1(8) . . ?  
O8 W8 O18 96.8(10) . . ?  
O33 W8 O18 160.5(8) . . ?  
O19 W8 O18 84.6(9) . . ?  
O8 W8 O24 103.2(8) . . ?  
O33 W8 O24 87.4(8) . . ?  
O19 W8 O24 153.6(8) . . ?  
O18 W8 O24 83.7(8) . . ?  
O8 W8 O27 166.7(9) . . ?  
O33 W8 O27 90.5(7) . . ?  
O19 W8 O27 72.5(7) . . ?  
O18 W8 O27 71.0(7) . . ?  
O24 W8 O27 81.4(7) . . ?  
O9 W9 O17 103.0(9) . . ?  
O9 W9 O32 102.9(9) . . ?  
O17 W9 O32 154.0(8) . . ?  
O9 W9 O23 99.3(9) . . ?  
O17 W9 O23 88.5(9) . . ?  
O32 W9 O23 87.1(8) . . ?  
O9 W9 O24 100.4(8) . . ?  
O17 W9 O24 89.8(8) . . ?  
O32 W9 O24 85.8(8) . . ?  
O23 W9 O24 160.1(8) . . ?

O9 W9 O25 171.7(8) . . ?  
O17 W9 O25 73.6(8) . . ?  
O32 W9 O25 80.6(8) . . ?  
O23 W9 O25 73.2(8) . . ?  
O24 W9 O25 87.3(7) . . ?  
O34 W10 O35 100.2(8) . . ?  
O34 W10 O40 94.6(7) . . ?  
O35 W10 O40 99.0(8) . . ?  
O34 W10 O32 102.5(8) . . ?  
O35 W10 O32 95.5(8) . . ?  
O40 W10 O32 155.2(7) . . ?  
O34 W10 O33 91.2(8) . . ?  
O35 W10 O33 168.4(7) . . ?  
O40 W10 O33 82.0(7) . . ?  
O32 W10 O33 79.9(8) . . ?  
O34 W10 O39 170.5(7) . . ?  
O35 W10 O39 85.7(8) . . ?  
O40 W10 O39 77.0(7) . . ?  
O32 W10 O39 84.2(7) . . ?  
O33 W10 O39 83.3(7) . . ?  
O50 W11 O39 101.6(10) . . ?  
O50 W11 O42 101.2(9) . . ?  
O39 W11 O42 96.4(8) . . ?  
O50 W11 O41 103.5(9) . . ?  
O39 W11 O41 88.5(8) . . ?  
O42 W11 O41 153.3(8) . . ?  
O50 W11 O61 96.2(9) . . ?  
O39 W11 O61 161.3(8) . . ?  
O42 W11 O61 85.5(8) . . ?  
O41 W11 O61 81.9(8) . . ?  
O50 W11 O48 164.0(8) . . ?  
O39 W11 O48 93.3(8) . . ?  
O42 W11 O48 71.2(7) . . ?  
O41 W11 O48 82.3(7) . . ?  
O61 W11 O48 69.6(7) . . ?  
O59 W12 O40 104.1(8) . . ?  
O59 W12 O41 99.5(8) . . ?  
O40 W12 O41 86.8(7) . . ?  
O59 W12 O60 103.4(9) . . ?  
O40 W12 O60 152.5(8) . . ?  
O41 W12 O60 89.5(8) . . ?  
O59 W12 O46 98.4(8) . . ?  
O40 W12 O46 88.1(7) . . ?  
O41 W12 O46 162.1(8) . . ?  
O60 W12 O46 87.2(7) . . ?  
O59 W12 O47 170.7(8) . . ?  
O40 W12 O47 79.5(7) . . ?  
O41 W12 O47 89.2(7) . . ?  
O60 W12 O47 73.1(7) . . ?  
O46 W12 O47 73.0(6) . . ?  
O58 W13 O65 99.7(8) . . ?  
O58 W13 O45 99.1(8) . . ?  
O65 W13 O45 88.8(7) . . ?  
O58 W13 O46 99.1(8) . . ?  
O65 W13 O46 89.3(7) . . ?  
O45 W13 O46 161.8(7) . . ?  
O58 W13 O57 103.0(8) . . ?  
O65 W13 O57 157.3(7) . . ?  
O45 W13 O57 87.3(7) . . ?  
O46 W13 O57 87.5(7) . . ?  
O58 W13 O47 171.4(8) . . ?  
O65 W13 O47 74.7(7) . . ?  
O45 W13 O47 87.4(7) . . ?  
O46 W13 O47 74.7(7) . . ?

O57 W13 O47 82.8(6) . . ?  
O58 W13 Cs1 45.6(7) . . ?  
O65 W13 Cs1 95.6(5) . . ?  
O45 W13 Cs1 53.5(5) . . ?  
O46 W13 Cs1 144.7(5) . . ?  
O57 W13 Cs1 99.9(5) . . ?  
O47 W13 Cs1 140.3(5) . . ?  
O56 W14 O55 103.1(9) . . ?  
O56 W14 O44 102.6(10) . . ?  
O55 W14 O44 93.5(8) . . ?  
O56 W14 O45 99.9(9) . . ?  
O55 W14 O45 89.9(8) . . ?  
O44 W14 O45 155.8(7) . . ?  
O56 W14 O64 93.6(10) . . ?  
O55 W14 O64 163.0(8) . . ?  
O44 W14 O64 85.3(8) . . ?  
O45 W14 O64 84.6(8) . . ?  
O56 W14 O49 165.5(9) . . ?  
O55 W14 O49 90.9(7) . . ?  
O44 W14 O49 72.7(7) . . ?  
O45 W14 O49 83.3(7) . . ?  
O64 W14 O49 72.6(8) . . ?  
O56 W14 Cs1 48.9(8) . . ?  
O55 W14 Cs1 92.2(5) . . ?  
O44 W14 Cs1 151.5(6) . . ?  
O45 W14 Cs1 52.0(5) . . ?  
O64 W14 Cs1 96.9(6) . . ?  
O49 W14 Cs1 135.1(5) . . ?  
O54 W15 O53 103.5(10) . . ?  
O54 W15 O43 100.5(9) . . ?  
O53 W15 O43 93.5(8) . . ?  
O54 W15 O44 99.5(10) . . ?  
O53 W15 O44 94.7(8) . . ?  
O43 W15 O44 156.0(8) . . ?  
O54 W15 O63 94.3(10) . . ?  
O53 W15 O63 162.3(8) . . ?  
O43 W15 O63 82.8(8) . . ?  
O44 W15 O63 82.6(8) . . ?  
O54 W15 O49 166.2(10) . . ?  
O53 W15 O49 89.5(8) . . ?  
O43 W15 O49 83.2(7) . . ?  
O44 W15 O49 74.3(7) . . ?  
O63 W15 O49 72.9(8) . . ?  
O52 W16 O51 104.2(9) . . ?  
O52 W16 O43 93.5(9) . . ?  
O51 W16 O43 101.8(9) . . ?  
O52 W16 O42 94.6(9) . . ?  
O51 W16 O42 98.2(9) . . ?  
O43 W16 O42 155.8(8) . . ?  
O52 W16 O62 161.3(8) . . ?  
O51 W16 O62 94.4(9) . . ?  
O43 W16 O62 81.8(8) . . ?  
O42 W16 O62 83.4(8) . . ?  
O52 W16 O48 88.8(8) . . ?  
O51 W16 O48 165.5(8) . . ?  
O43 W16 O48 83.6(7) . . ?  
O42 W16 O48 73.8(7) . . ?  
O62 W16 O48 72.8(7) . . ?  
O71 W17 O62 100.9(10) . . ?  
O71 W17 O61 102.1(10) . . ?  
O62 W17 O61 94.9(9) . . ?  
O71 W17 O67 99.9(11) . . ?  
O62 W17 O67 91.1(9) . . ?  
O61 W17 O67 155.7(9) . . ?

O71 W17 O68 98.8(9) . . ?  
O62 W17 O68 159.6(8) . . ?  
O61 W17 O68 85.8(8) . . ?  
O67 W17 O68 80.6(8) . . ?  
O71 W17 O48 174.1(9) . . ?  
O62 W17 O48 75.8(8) . . ?  
O61 W17 O48 73.5(7) . . ?  
O67 W17 O48 85.2(8) . . ?  
O68 W17 O48 85.0(6) . . ?  
O70 W18 O66 101.6(9) . . ?  
O70 W18 O68 101.7(8) . . ?  
O66 W18 O68 89.8(8) . . ?  
O70 W18 O60 98.4(9) . . ?  
O66 W18 O60 159.3(8) . . ?  
O68 W18 O60 91.4(8) . . ?  
O70 W18 O65 97.7(8) . . ?  
O66 W18 O65 89.6(8) . . ?  
O68 W18 O65 160.3(7) . . ?  
O60 W18 O65 82.5(7) . . ?  
O70 W18 O47 167.9(8) . . ?  
O66 W18 O47 86.5(7) . . ?  
O68 W18 O47 87.2(7) . . ?  
O60 W18 O47 72.9(7) . . ?  
O65 W18 O47 73.2(6) . . ?  
O70 W18 Cs1 51.9(7) . 2 ?  
O66 W18 Cs1 50.5(6) . 2 ?  
O68 W18 Cs1 106.1(6) . 2 ?  
O60 W18 Cs1 147.5(5) . 2 ?  
O65 W18 Cs1 88.5(5) . 2 ?  
O47 W18 Cs1 133.7(5) . 2 ?  
O69 W19 O63 101.5(10) . . ?  
O69 W19 O64 100.1(10) . . ?  
O63 W19 O64 91.9(9) . . ?  
O69 W19 O67 99.0(10) . . ?  
O63 W19 O67 92.7(9) . . ?  
O64 W19 O67 159.1(10) . . ?  
O69 W19 O66 98.6(9) . . ?  
O63 W19 O66 159.7(9) . . ?  
O64 W19 O66 87.6(8) . . ?  
O67 W19 O66 81.1(8) . . ?  
O69 W19 O49 174.7(9) . . ?  
O63 W19 O49 75.4(8) . . ?  
O64 W19 O49 75.8(8) . . ?  
O67 W19 O49 85.6(8) . . ?  
O66 W19 O49 84.7(7) . . ?  
O69 W19 Cs1 50.6(7) . 2 ?  
O63 W19 Cs1 150.3(7) . 2 ?  
O64 W19 Cs1 84.5(7) . 2 ?  
O67 W19 Cs1 101.1(6) . 2 ?  
O66 W19 Cs1 49.9(6) . 2 ?  
O49 W19 Cs1 131.3(5) . 2 ?  
O72 W20 O73 102.1(8) . . ?  
O72 W20 O57 92.9(8) . . ?  
O73 W20 O57 105.8(7) . . ?  
O72 W20 O109 100.4(8) . . ?  
O73 W20 O109 91.7(7) . . ?  
O57 W20 O109 155.3(7) . . ?  
O72 W20 O110 93.7(7) . . ?  
O73 W20 O110 158.7(8) . . ?  
O57 W20 O110 87.3(6) . . ?  
O109 W20 O110 71.3(6) . . ?  
O72 W20 O55 171.3(7) . . ?  
O73 W20 O55 84.2(8) . . ?  
O57 W20 O55 79.6(7) . . ?



O109 W20 O55 85.2(7) . . ?  
O110 W20 O55 81.7(7) . . ?  
O72 W20 Cs2 64.2(6) . . ?  
O73 W20 Cs2 74.3(5) . . ?  
O57 W20 Cs2 155.9(6) . . ?  
O109 W20 Cs2 45.6(5) . . ?  
O110 W20 Cs2 100.7(4) . . ?  
O55 W20 Cs2 123.9(5) . . ?  
O120 W21 O111 99.1(8) . . ?  
O120 W21 O109 101.6(8) . . ?  
O111 W21 O109 98.0(7) . . ?  
O120 W21 O80 96.8(8) . . ?  
O111 W21 O80 104.7(7) . . ?  
O109 W21 O80 148.0(7) . . ?  
O120 W21 O110 94.8(7) . . ?  
O111 W21 O110 163.8(7) . . ?  
O109 W21 O110 70.7(6) . . ?  
O80 W21 O110 81.9(6) . . ?  
O120 W21 O157 176.0(7) . . ?  
O111 W21 O157 84.0(7) . . ?  
O109 W21 O157 80.4(7) . . ?  
O80 W21 O157 79.8(7) . . ?  
O110 W21 O157 82.6(6) . . ?  
O120 W21 Cs2 133.8(6) . . ?  
O111 W21 Cs2 64.6(6) . . ?  
O109 W21 Cs2 45.2(5) . . ?  
O80 W21 Cs2 128.5(5) . . ?  
O110 W21 Cs2 99.6(5) . . ?  
O157 W21 Cs2 50.0(4) . . ?  
O79 W22 O95 100.6(8) . . ?  
O79 W22 O81 99.5(9) . . ?  
O95 W22 O81 90.6(8) . . ?  
O79 W22 O78 100.3(8) . . ?  
O95 W22 O78 87.8(8) . . ?  
O81 W22 O78 160.1(7) . . ?  
O79 W22 O80 100.7(7) . . ?  
O95 W22 O80 158.6(7) . . ?  
O81 W22 O80 86.9(8) . . ?  
O78 W22 O80 87.4(7) . . ?  
O79 W22 O101 172.9(8) . . ?  
O95 W22 O101 75.2(7) . . ?  
O81 W22 O101 75.1(7) . . ?  
O78 W22 O101 85.4(7) . . ?  
O80 W22 O101 83.6(6) . . ?  
O79 W22 Cs1 34.0(7) . . ?  
O95 W22 Cs1 122.6(6) . . ?  
O81 W22 Cs1 74.2(6) . . ?  
O78 W22 Cs1 122.9(5) . . ?  
O80 W22 Cs1 77.0(5) . . ?  
O101 W22 Cs1 144.2(5) . . ?  
O77 W23 O157 102.8(8) . . ?  
O77 W23 O78 105.7(8) . . ?  
O157 W23 O78 88.5(8) . . ?  
O77 W23 O93 97.8(8) . . ?  
O157 W23 O93 94.6(7) . . ?  
O78 W23 O93 154.9(7) . . ?  
O77 W23 O94 92.8(8) . . ?  
O157 W23 O94 164.2(7) . . ?  
O78 W23 O94 84.7(7) . . ?  
O93 W23 O94 85.8(7) . . ?  
O77 W23 O102 160.8(8) . . ?  
O157 W23 O102 94.1(7) . . ?  
O78 W23 O102 83.5(6) . . ?  
O93 W23 O102 71.5(6) . . ?

O94 W23 O102 71.0(6) . . ?  
O77 W23 Cs2 81.7(6) . . ?  
O157 W23 Cs2 46.5(5) . . ?  
O78 W23 Cs2 134.2(5) . . ?  
O93 W23 Cs2 57.0(5) . . ?  
O94 W23 Cs2 140.8(5) . . ?  
O102 W23 Cs2 104.1(4) . . ?  
O91 W24 O92 104.6(9) . . ?  
O91 W24 O93 93.8(7) . . ?  
O92 W24 O93 96.7(8) . . ?  
O91 W24 O90 94.7(7) . . ?  
O92 W24 O90 101.7(8) . . ?  
O93 W24 O90 157.0(7) . . ?  
O91 W24 O99 161.1(7) . . ?  
O92 W24 O99 94.2(8) . . ?  
O93 W24 O99 81.8(7) . . ?  
O90 W24 O99 83.2(7) . . ?  
O91 W24 O102 89.5(7) . . ?  
O92 W24 O102 163.7(8) . . ?  
O93 W24 O102 73.8(6) . . ?  
O90 W24 O102 85.0(6) . . ?  
O99 W24 O102 71.6(6) . . ?  
O91 W24 Cs2 51.2(5) . . ?  
O92 W24 Cs2 85.2(6) . . ?  
O93 W24 Cs2 49.3(5) . . ?  
O90 W24 Cs2 145.5(5) . . ?  
O99 W24 Cs2 130.4(4) . . ?  
O102 W24 Cs2 97.8(4) . . ?  
O89 W25 O88 103.5(8) . . ?  
O89 W25 O90 101.0(8) . . ?  
O88 W25 O90 91.4(8) . . ?  
O89 W25 O87 95.5(8) . . ?  
O88 W25 O87 96.3(8) . . ?  
O90 W25 O87 159.7(7) . . ?  
O89 W25 O98 94.1(8) . . ?  
O88 W25 O98 162.2(7) . . ?  
O90 W25 O98 82.4(7) . . ?  
O87 W25 O98 84.7(8) . . ?  
O89 W25 O100 165.0(7) . . ?  
O88 W25 O100 89.9(7) . . ?  
O90 W25 O100 85.1(7) . . ?  
O87 W25 O100 76.2(7) . . ?  
O98 W25 O100 73.0(7) . . ?  
O86 W26 O85 101.8(9) . . ?  
O86 W26 O84 102.7(9) . . ?  
O85 W26 O84 89.3(7) . . ?  
O86 W26 O87 101.4(9) . . ?  
O85 W26 O87 93.6(8) . . ?  
O84 W26 O87 154.5(8) . . ?  
O86 W26 O97 93.8(9) . . ?  
O85 W26 O97 164.0(7) . . ?  
O84 W26 O97 83.5(7) . . ?  
O87 W26 O97 87.0(7) . . ?  
O86 W26 O100 164.0(9) . . ?  
O85 W26 O100 92.9(7) . . ?  
O84 W26 O100 83.7(7) . . ?  
O87 W26 O100 70.9(7) . . ?  
O97 W26 O100 72.2(6) . . ?  
O83 W27 O82 104.2(9) . . ?  
O83 W27 O84 100.9(8) . . ?  
O82 W27 O84 87.1(7) . . ?  
O83 W27 O96 101.6(8) . . ?  
O82 W27 O96 154.1(8) . . ?  
O84 W27 O96 90.1(7) . . ?

O83 W27 O81 98.4(8) . . ?  
O82 W27 O81 86.6(7) . . ?  
O84 W27 O81 160.6(8) . . ?  
O96 W27 O81 87.6(7) . . ?  
O83 W27 O101 169.4(7) . . ?  
O82 W27 O101 81.6(7) . . ?  
O84 W27 O101 88.1(7) . . ?  
O96 W27 O101 72.6(7) . . ?  
O81 W27 O101 72.8(7) . . ?  
O107 W28 O104 101.1(9) . . ?  
O107 W28 O103 102.8(8) . . ?  
O104 W28 O103 93.0(8) . . ?  
O107 W28 O96 96.9(9) . . ?  
O104 W28 O96 160.6(7) . . ?  
O103 W28 O96 90.1(8) . . ?  
O107 W28 O95 96.5(8) . . ?  
O104 W28 O95 88.9(8) . . ?  
O103 W28 O95 159.9(8) . . ?  
O96 W28 O95 81.8(7) . . ?  
O107 W28 O101 166.8(8) . . ?  
O104 W28 O101 87.5(7) . . ?  
O103 W28 O101 86.6(7) . . ?  
O96 W28 O101 73.6(7) . . ?  
O95 W28 O101 73.4(7) . . ?  
O108 W29 O94 99.2(8) . . ?  
O108 W29 O99 100.5(9) . . ?  
O94 W29 O99 91.9(7) . . ?  
O108 W29 O105 103.0(8) . . ?  
O94 W29 O105 156.0(8) . . ?  
O99 W29 O105 93.0(7) . . ?  
O108 W29 O104 101.1(8) . . ?  
O94 W29 O104 84.3(7) . . ?  
O99 W29 O104 158.4(8) . . ?  
O105 W29 O104 82.5(7) . . ?  
O108 W29 O102 169.8(8) . . ?  
O94 W29 O102 73.6(7) . . ?  
O99 W29 O102 73.0(7) . . ?  
O105 W29 O102 85.5(7) . . ?  
O104 W29 O102 85.5(7) . . ?  
O106 W30 O98 101.7(8) . . ?  
O106 W30 O97 98.3(8) . . ?  
O98 W30 O97 94.1(8) . . ?  
O106 W30 O105 101.8(9) . . ?  
O98 W30 O105 90.1(8) . . ?  
O97 W30 O105 158.1(7) . . ?  
O106 W30 O103 99.5(8) . . ?  
O98 W30 O103 158.7(8) . . ?  
O97 W30 O103 85.5(8) . . ?  
O105 W30 O103 83.0(8) . . ?  
O106 W30 O100 172.9(8) . . ?  
O98 W30 O100 73.8(7) . . ?  
O97 W30 O100 76.9(7) . . ?  
O105 W30 O100 83.8(7) . . ?  
O103 W30 O100 85.4(7) . . ?  
O117 W31 O114 99.5(8) . . ?  
O117 W31 O82 94.6(8) . . ?  
O114 W31 O82 98.8(8) . . ?  
O117 W31 O126 102.3(8) . . ?  
O114 W31 O126 95.7(8) . . ?  
O82 W31 O126 155.6(7) . . ?  
O117 W31 O125 86.8(8) . . ?  
O114 W31 O125 173.6(7) . . ?  
O82 W31 O125 81.8(8) . . ?  
O126 W31 O125 81.7(7) . . ?

O117 W31 O85 171.9(7) . . ?  
O114 W31 O85 86.5(8) . . ?  
O82 W31 O85 79.0(7) . . ?  
O126 W31 O85 82.4(7) . . ?  
O125 W31 O85 87.4(7) . . ?  
O135 W32 O125 101.4(10) . . ?  
O135 W32 O136 102.4(9) . . ?  
O125 W32 O136 94.7(8) . . ?  
O135 W32 O119 104.9(9) . . ?  
O125 W32 O119 86.4(8) . . ?  
O136 W32 O119 151.9(8) . . ?  
O135 W32 O144 94.6(9) . . ?  
O125 W32 O144 162.9(8) . . ?  
O136 W32 O144 87.8(8) . . ?  
O119 W32 O144 83.6(8) . . ?  
O135 W32 O143 163.4(9) . . ?  
O125 W32 O143 94.0(7) . . ?  
O136 W32 O143 70.0(7) . . ?  
O119 W32 O143 81.9(7) . . ?  
O144 W32 O143 70.9(7) . . ?  
O133 W33 O119 101.0(9) . . ?  
O133 W33 O149 100.7(9) . . ?  
O119 W33 O149 90.3(8) . . ?  
O133 W33 O126 104.7(9) . . ?  
O119 W33 O126 88.9(8) . . ?  
O149 W33 O126 154.3(8) . . ?  
O133 W33 O132 97.9(9) . . ?  
O119 W33 O132 160.7(7) . . ?  
O149 W33 O132 90.0(8) . . ?  
O126 W33 O132 82.6(7) . . ?  
O133 W33 O142 166.9(8) . . ?  
O119 W33 O142 90.9(7) . . ?  
O149 W33 O142 73.5(7) . . ?  
O126 W33 O142 80.8(7) . . ?  
O132 W33 O142 70.7(7) . . ?  
O131 W34 O148 100.8(8) . . ?  
O131 W34 O127 101.1(8) . . ?  
O148 W34 O127 157.9(7) . . ?  
O131 W34 O132 98.9(8) . . ?  
O148 W34 O132 90.5(8) . . ?  
O127 W34 O132 88.4(7) . . ?  
O131 W34 O130 103.1(8) . . ?  
O148 W34 O130 86.7(8) . . ?  
O127 W34 O130 86.2(8) . . ?  
O132 W34 O130 158.0(7) . . ?  
O131 W34 O142 169.6(7) . . ?  
O148 W34 O142 73.0(7) . . ?  
O127 W34 O142 85.6(7) . . ?  
O132 W34 O142 73.2(7) . . ?  
O130 W34 O142 85.1(7) . . ?  
O131 W34 Cs3 38.7(6) . . ?  
O148 W34 Cs3 137.5(5) . . ?  
O127 W34 Cs3 64.4(5) . . ?  
O132 W34 Cs3 85.7(5) . . ?  
O130 W34 Cs3 110.9(6) . . ?  
O142 W34 Cs3 143.9(5) . . ?  
O129 W35 O128 102.8(8) . . ?  
O129 W35 O130 102.9(8) . . ?  
O128 W35 O130 89.1(8) . . ?  
O129 W35 O140 100.9(8) . . ?  
O128 W35 O140 91.1(8) . . ?  
O130 W35 O140 155.6(7) . . ?  
O129 W35 O147 95.6(8) . . ?  
O128 W35 O147 161.3(8) . . ?

O130 W35 O147 83.6(8) . . ?  
O140 W35 O147 88.6(8) . . ?  
O129 W35 O141 165.6(8) . . ?  
O128 W35 O141 90.5(7) . . ?  
O130 W35 O141 82.6(7) . . ?  
O140 W35 O141 73.0(6) . . ?  
O147 W35 O141 71.5(7) . . ?  
O129 W35 K3 49.7(6) . 1\_455 ?  
O128 W35 K3 116.2(5) . 1\_455 ?  
O130 W35 K3 144.5(6) . 1\_455 ?  
O140 W35 K3 54.5(5) . 1\_455 ?  
O147 W35 K3 78.5(5) . 1\_455 ?  
O141 W35 K3 119.3(4) . 1\_455 ?  
O139 W36 O123 105.0(10) . . ?  
O139 W36 O138 99.6(9) . . ?  
O123 W36 O138 91.9(9) . . ?  
O139 W36 O140 97.3(8) . . ?  
O123 W36 O140 93.9(8) . . ?  
O138 W36 O140 160.1(7) . . ?  
O139 W36 O146 96.4(9) . . ?  
O123 W36 O146 158.5(8) . . ?  
O138 W36 O146 82.4(8) . . ?  
O140 W36 O146 85.2(8) . . ?  
O139 W36 O141 166.7(9) . . ?  
O123 W36 O141 86.8(8) . . ?  
O138 W36 O141 85.8(7) . . ?  
O140 W36 O141 75.6(7) . . ?  
O146 W36 O141 72.1(7) . . ?  
O137 W37 O124 104.4(10) . . ?  
O137 W37 O138 99.9(9) . . ?  
O124 W37 O138 92.2(9) . . ?  
O137 W37 O136 97.0(9) . . ?  
O124 W37 O136 92.7(8) . . ?  
O138 W37 O136 160.6(7) . . ?  
O137 W37 O145 95.6(9) . . ?  
O124 W37 O145 160.0(8) . . ?  
O138 W37 O145 83.6(8) . . ?  
O136 W37 O145 85.4(8) . . ?  
O137 W37 O143 164.8(8) . . ?  
O124 W37 O143 88.5(8) . . ?  
O138 W37 O143 87.4(7) . . ?  
O136 W37 O143 74.0(7) . . ?  
O145 W37 O143 71.8(8) . . ?  
O155 W38 O145 103.1(11) . . ?  
O155 W38 O144 98.8(11) . . ?  
O145 W38 O144 92.2(9) . . ?  
O155 W38 O151 102.6(11) . . ?  
O145 W38 O151 88.7(9) . . ?  
O144 W38 O151 157.8(9) . . ?  
O155 W38 O150 99.6(10) . . ?  
O145 W38 O150 157.0(9) . . ?  
O144 W38 O150 88.1(8) . . ?  
O151 W38 O150 82.6(8) . . ?  
O155 W38 O143 171.0(10) . . ?  
O145 W38 O143 72.3(8) . . ?  
O144 W38 O143 74.1(8) . . ?  
O151 W38 O143 85.1(8) . . ?  
O150 W38 O143 85.7(7) . . ?  
O154 W39 O151 99.6(10) . . ?  
O154 W39 O146 102.3(9) . . ?  
O151 W39 O146 90.1(8) . . ?  
O154 W39 O147 101.4(10) . . ?  
O151 W39 O147 156.4(9) . . ?  
O146 W39 O147 95.8(8) . . ?

O154 W39 O152 100.3 (9) . . ?  
O151 W39 O152 83.7 (8) . . ?  
O146 W39 O152 157.3 (9) . . ?  
O147 W39 O152 82.1 (8) . . ?  
O154 W39 O141 174.0 (8) . . ?  
O151 W39 O141 84.7 (8) . . ?  
O146 W39 O141 73.4 (7) . . ?  
O147 W39 O141 75.3 (8) . . ?  
O152 W39 O141 84.3 (8) . . ?  
O153 W40 O150 101.4 (9) . . ?  
O153 W40 O152 103.1 (10) . . ?  
O150 W40 O152 91.2 (9) . . ?  
O153 W40 O148 100.2 (9) . . ?  
O150 W40 O148 157.6 (8) . . ?  
O152 W40 O148 89.6 (8) . . ?  
O153 W40 O149 97.8 (9) . . ?  
O150 W40 O149 86.8 (8) . . ?  
O152 W40 O149 159.0 (9) . . ?  
O148 W40 O149 84.5 (8) . . ?  
O153 W40 O142 166.8 (9) . . ?  
O150 W40 O142 86.8 (8) . . ?  
O152 W40 O142 86.8 (8) . . ?  
O148 W40 O142 70.9 (7) . . ?  
O149 W40 O142 72.2 (7) . . ?  
O118 W41 O115 104.3 (8) . . ?  
O118 W41 O194 92.3 (7) . . ?  
O115 W41 O194 97.9 (8) . . ?  
O118 W41 O127 101.4 (7) . . ?  
O115 W41 O127 92.8 (8) . . ?  
O194 W41 O127 160.0 (7) . . ?  
O118 W41 O192 160.5 (8) . . ?  
O115 W41 O192 93.3 (7) . . ?  
O194 W41 O192 76.7 (6) . . ?  
O127 W41 O192 85.9 (6) . . ?  
O118 W41 O128 83.7 (8) . . ?  
O115 W41 O128 169.2 (7) . . ?  
O194 W41 O128 88.9 (7) . . ?  
O127 W41 O128 78.3 (7) . . ?  
O192 W41 O128 80.2 (7) . . ?  
O118 W41 Eu5 128.5 (6) . . ?  
O115 W41 Eu5 93.4 (5) . . ?  
O194 W41 Eu5 36.9 (5) . . ?  
O127 W41 Eu5 125.9 (5) . . ?  
O192 W41 Eu5 40.1 (4) . . ?  
O128 W41 Eu5 87.1 (5) . . ?  
O118 W41 Cs3 152.1 (6) . . ?  
O115 W41 Cs3 53.2 (5) . . ?  
O194 W41 Cs3 106.1 (5) . . ?  
O127 W41 Cs3 67.4 (5) . . ?  
O192 W41 Cs3 47.3 (5) . . ?  
O128 W41 Cs3 116.9 (5) . . ?  
Eu5 W41 Cs3 74.20 (4) . . ?  
O159 W42 O158 104.4 (9) . . ?  
O159 W42 O160 92.2 (8) . . ?  
O158 W42 O160 103.7 (8) . . ?  
O159 W42 O173 94.0 (8) . . ?  
O158 W42 O173 92.7 (7) . . ?  
O160 W42 O173 160.4 (7) . . ?  
O159 W42 O178 165.3 (8) . . ?  
O158 W42 O178 90.3 (8) . . ?  
O160 W42 O178 84.6 (7) . . ?  
O173 W42 O178 84.7 (7) . . ?  
O159 W42 O176 92.3 (8) . . ?  
O158 W42 O176 160.0 (8) . . ?

O160 W42 O176 86.4 (7) . . ?  
O173 W42 O176 74.8 (7) . . ?  
O178 W42 O176 73.2 (7) . . ?  
O161 W43 O113 105.4 (9) . . ?  
O161 W43 O160 92.5 (8) . . ?  
O113 W43 O160 102.7 (7) . . ?  
O161 W43 O162 94.7 (8) . . ?  
O113 W43 O162 96.4 (7) . . ?  
O160 W43 O162 157.0 (7) . . ?  
O161 W43 O179 159.6 (8) . . ?  
O113 W43 O179 94.9 (8) . . ?  
O160 W43 O179 80.8 (7) . . ?  
O162 W43 O179 84.9 (7) . . ?  
O161 W43 O175 87.9 (8) . . ?  
O113 W43 O175 164.2 (8) . . ?  
O160 W43 O175 84.8 (7) . . ?  
O162 W43 O175 73.6 (6) . . ?  
O179 W43 O175 72.4 (7) . . ?  
O161 W43 Cs2 126.9 (6) . . ?  
O113 W43 Cs2 50.4 (6) . . ?  
O160 W43 Cs2 58.9 (5) . . ?  
O162 W43 Cs2 129.8 (5) . . ?  
O179 W43 Cs2 65.6 (5) . . ?  
O175 W43 Cs2 127.3 (5) . . ?  
O161 W43 Cs3 56.2 (6) . . ?  
O113 W43 Cs3 82.8 (6) . . ?  
O160 W43 Cs3 148.2 (6) . . ?  
O162 W43 Cs3 46.6 (5) . . ?  
O179 W43 Cs3 130.4 (5) . . ?  
O175 W43 Cs3 98.2 (5) . . ?  
Cs2 W43 Cs3 133.13 (6) . . ?  
O164 W44 O163 103.4 (9) . . ?  
O164 W44 O165 100.6 (9) . . ?  
O163 W44 O165 90.0 (9) . . ?  
O164 W44 O162 102.0 (8) . . ?  
O163 W44 O162 90.8 (8) . . ?  
O165 W44 O162 156.6 (8) . . ?  
O164 W44 O180 94.6 (9) . . ?  
O163 W44 O180 161.9 (8) . . ?  
O165 W44 O180 87.0 (9) . . ?  
O162 W44 O180 85.0 (8) . . ?  
O164 W44 O175 165.0 (9) . . ?  
O163 W44 O175 90.6 (7) . . ?  
O165 W44 O175 84.7 (7) . . ?  
O162 W44 O175 71.9 (6) . . ?  
O180 W44 O175 71.4 (7) . . ?  
O164 W44 Cs3 82.7 (7) . . ?  
O163 W44 Cs3 48.6 (6) . . ?  
O165 W44 Cs3 137.3 (7) . . ?  
O162 W44 Cs3 52.8 (5) . . ?  
O180 W44 Cs3 135.5 (5) . . ?  
O175 W44 Cs3 103.1 (5) . . ?  
O167 W45 O168 100.6 (10) . . ?  
O167 W45 O166 102.8 (10) . . ?  
O168 W45 O166 92.5 (9) . . ?  
O167 W45 O181 99.0 (11) . . ?  
O168 W45 O181 88.1 (9) . . ?  
O166 W45 O181 157.6 (8) . . ?  
O167 W45 O165 101.9 (10) . . ?  
O168 W45 O165 157.2 (8) . . ?  
O166 W45 O165 86.4 (9) . . ?  
O181 W45 O165 84.6 (9) . . ?  
O167 W45 O174 169.6 (9) . . ?  
O168 W45 O174 72.9 (8) . . ?

O166 W45 O174 85.8(7) . . ?  
O181 W45 O174 73.0(8) . . ?  
O165 W45 O174 84.3(7) . . ?  
O373 W46 O182 100.9(10) . . ?  
O373 W46 O196 104.2(10) . . ?  
O182 W46 O196 154.9(9) . . ?  
O373 W46 O170 99.2(9) . . ?  
O182 W46 O170 89.2(10) . . ?  
O196 W46 O170 88.4(9) . . ?  
O373 W46 O168 99.4(9) . . ?  
O182 W46 O168 88.5(10) . . ?  
O196 W46 O168 85.9(9) . . ?  
O170 W46 O168 161.4(9) . . ?  
O373 W46 O174 170.3(8) . . ?  
O182 W46 O174 74.8(8) . . ?  
O196 W46 O174 80.2(8) . . ?  
O170 W46 O174 89.5(8) . . ?  
O168 W46 O174 72.1(8) . . ?  
O172 W47 O171 103.5(9) . . ?  
O172 W47 O177 93.0(9) . . ?  
O171 W47 O177 161.8(8) . . ?  
O172 W47 O173 104.5(8) . . ?  
O171 W47 O173 96.2(8) . . ?  
O177 W47 O173 86.9(8) . . ?  
O172 W47 O170 104.5(9) . . ?  
O171 W47 O170 85.7(9) . . ?  
O177 W47 O170 82.7(9) . . ?  
O173 W47 O170 149.6(8) . . ?  
O188 W48 O178 104.8(9) . . ?  
O188 W48 O177 103.3(9) . . ?  
O178 W48 O177 91.3(8) . . ?  
O188 W48 O184 101.0(9) . . ?  
O178 W48 O184 87.2(7) . . ?  
O177 W48 O184 155.2(8) . . ?  
O188 W48 O185 99.2(9) . . ?  
O178 W48 O185 155.3(8) . . ?  
O177 W48 O185 89.0(8) . . ?  
O184 W48 O185 82.3(8) . . ?  
O188 W48 O176 173.9(8) . . ?  
O178 W48 O176 70.3(7) . . ?  
O177 W48 O176 73.6(7) . . ?  
O184 W48 O176 82.6(7) . . ?  
O185 W48 O176 86.1(7) . . ?  
O187 W49 O179 101.0(9) . . ?  
O187 W49 O180 102.3(9) . . ?  
O179 W49 O180 91.6(8) . . ?  
O187 W49 O184 101.6(9) . . ?  
O179 W49 O184 91.7(8) . . ?  
O180 W49 O184 154.8(8) . . ?  
O187 W49 O183 102.0(9) . . ?  
O179 W49 O183 157.0(9) . . ?  
O180 W49 O183 83.8(8) . . ?  
O184 W49 O183 83.4(8) . . ?  
O187 W49 O175 171.1(8) . . ?  
O179 W49 O175 72.9(7) . . ?  
O180 W49 O175 71.9(7) . . ?  
O184 W49 O175 85.3(7) . . ?  
O183 W49 O175 84.3(7) . . ?  
O186 W50 O183 102.7(11) . . ?  
O186 W50 O185 101.2(11) . . ?  
O183 W50 O185 89.1(8) . . ?  
O186 W50 O181 100.1(11) . . ?  
O183 W50 O181 91.3(9) . . ?  
O185 W50 O181 158.1(9) . . ?



O186 W50 O182 100.7(11) . . ?  
O183 W50 O182 156.6(9) . . ?  
O185 W50 O182 86.1(8) . . ?  
O181 W50 O182 84.9(9) . . ?  
O186 W50 O174 168.1(10) . . ?  
O183 W50 O174 87.6(8) . . ?  
O185 W50 O174 84.7(8) . . ?  
O181 W50 O174 73.4(8) . . ?  
O182 W50 O174 69.2(8) . . ?  
O193 W51 O195 98.3(8) . . ?  
O193 W51 O197 94.9(8) . . ?  
O195 W51 O197 101.5(9) . . ?  
O193 W51 O196 99.9(9) . . ?  
O195 W51 O196 95.9(9) . . ?  
O197 W51 O196 155.3(8) . . ?  
O193 W51 O198 174.2(9) . . ?  
O195 W51 O198 87.4(8) . . ?  
O197 W51 O198 83.2(8) . . ?  
O196 W51 O198 80.2(8) . . ?  
O193 W51 O171 84.7(8) . . ?  
O195 W51 O171 173.9(8) . . ?  
O197 W51 O171 83.5(8) . . ?  
O196 W51 O171 78.3(8) . . ?  
O198 W51 O171 89.7(8) . . ?  
O199 W52 O198 101.5(11) . . ?  
O199 W52 O200 100.8(10) . . ?  
O198 W52 O200 90.3(9) . . ?  
O199 W52 O134 103.8(10) . . ?  
O198 W52 O134 90.7(9) . . ?  
O200 W52 O134 154.7(10) . . ?  
O199 W52 O220 95.4(10) . . ?  
O198 W52 O220 163.1(10) . . ?  
O200 W52 O220 86.5(9) . . ?  
O134 W52 O220 85.3(9) . . ?  
O199 W52 O215 166.7(9) . . ?  
O198 W52 O215 90.4(8) . . ?  
O200 W52 O215 73.2(8) . . ?  
O134 W52 O215 81.6(8) . . ?  
O220 W52 O215 72.7(8) . . ?  
O213 W53 O219 101.1(9) . . ?  
O213 W53 O212 99.4(10) . . ?  
O219 W53 O212 89.2(9) . . ?  
O213 W53 O197 105.6(9) . . ?  
O219 W53 O197 153.2(9) . . ?  
O212 W53 O197 87.6(8) . . ?  
O213 W53 O134 99.3(10) . . ?  
O219 W53 O134 87.2(9) . . ?  
O212 W53 O134 161.3(10) . . ?  
O197 W53 O134 87.3(8) . . ?  
O213 W53 O214 172.5(9) . . ?  
O219 W53 O214 77.0(8) . . ?  
O212 W53 O214 73.4(8) . . ?  
O197 W53 O214 76.6(8) . . ?  
O134 W53 O214 87.9(8) . . ?  
O210 W54 O211 104.0(10) . . ?  
O210 W54 O209 101.0(11) . . ?  
O211 W54 O209 95.0(10) . . ?  
O210 W54 O212 98.1(10) . . ?  
O211 W54 O212 92.6(10) . . ?  
O209 W54 O212 157.1(9) . . ?  
O210 W54 O218 91.1(10) . . ?  
O211 W54 O218 164.7(10) . . ?  
O209 W54 O218 84.2(9) . . ?  
O212 W54 O218 82.9(9) . . ?

O210 W54 O214 161.6(8) . . ?  
O211 W54 O214 92.1(9) . . ?  
O209 W54 O214 86.2(8) . . ?  
O212 W54 O214 71.9(8) . . ?  
O218 W54 O214 72.6(8) . . ?  
O210 W54 K3 53.6(8) . 1\_455 ?  
O211 W54 K3 72.7(8) . 1\_455 ?  
O209 W54 K3 61.9(7) . 1\_455 ?  
O212 W54 K3 140.8(6) . 1\_455 ?  
O218 W54 K3 119.6(7) . 1\_455 ?  
O214 W54 K3 142.3(5) . 1\_455 ?  
O207 W55 O208 104.1(13) . . ?  
O207 W55 O209 100.8(13) . . ?  
O208 W55 O209 95.1(10) . . ?  
O207 W55 O206 99.8(13) . . ?  
O208 W55 O206 90.7(10) . . ?  
O209 W55 O206 156.6(10) . . ?  
O207 W55 O217 94.2(14) . . ?  
O208 W55 O217 161.3(10) . . ?  
O209 W55 O217 85.2(9) . . ?  
O206 W55 O217 82.3(10) . . ?  
O207 W55 O216 162.5(13) . . ?  
O208 W55 O216 90.9(9) . . ?  
O209 W55 O216 86.6(8) . . ?  
O206 W55 O216 70.5(9) . . ?  
O217 W55 O216 70.4(9) . . ?  
O207 W55 K3 57.3(12) . 1\_455 ?  
O208 W55 K3 72.7(7) . 1\_455 ?  
O209 W55 K3 57.7(6) . 1\_455 ?  
O206 W55 K3 145.2(7) . 1\_455 ?  
O217 W55 K3 122.0(7) . 1\_455 ?  
O216 W55 K3 137.9(6) . 1\_455 ?  
O205 W56 O204 104.7(11) . . ?  
O205 W56 O206 98.0(12) . . ?  
O204 W56 O206 93.4(10) . . ?  
O205 W56 O222 95.7(11) . . ?  
O204 W56 O222 159.6(9) . . ?  
O206 W56 O222 85.2(10) . . ?  
O205 W56 O203 101.9(11) . . ?  
O204 W56 O203 90.2(10) . . ?  
O206 W56 O203 158.2(10) . . ?  
O222 W56 O203 84.0(9) . . ?  
O205 W56 O216 165.6(11) . . ?  
O204 W56 O216 87.6(9) . . ?  
O206 W56 O216 73.4(10) . . ?  
O222 W56 O216 72.4(8) . . ?  
O203 W56 O216 85.3(8) . . ?  
O203 W57 O202 102.8(11) . . ?  
O203 W57 O201 94.4(11) . . ?  
O202 W57 O201 103.8(10) . . ?  
O203 W57 O221 83.1(11) . . ?  
O202 W57 O221 96.5(10) . . ?  
O201 W57 O221 159.5(10) . . ?  
O203 W57 O200 158.6(10) . . ?  
O202 W57 O200 96.5(10) . . ?  
O201 W57 O200 90.0(9) . . ?  
O221 W57 O200 85.5(10) . . ?  
O203 W57 O215 84.7(10) . . ?  
O202 W57 O215 166.6(9) . . ?  
O201 W57 O215 86.4(8) . . ?  
O221 W57 O215 73.1(9) . . ?  
O200 W57 O215 74.7(8) . . ?  
O227 W58 O223 101.9(12) . . ?  
O227 W58 O221 100.4(11) . . ?

O223 W58 O221 90.0(11) . . ?  
O227 W58 O220 98.4(11) . . ?  
O223 W58 O220 159.6(10) . . ?  
O221 W58 O220 88.4(11) . . ?  
O227 W58 O224 100.8(11) . . ?  
O223 W58 O224 82.1(11) . . ?  
O221 W58 O224 158.5(10) . . ?  
O220 W58 O224 92.1(11) . . ?  
O227 W58 O215 171.6(10) . . ?  
O223 W58 O215 83.9(10) . . ?  
O221 W58 O215 73.3(9) . . ?  
O220 W58 O215 76.2(8) . . ?  
O224 W58 O215 85.9(9) . . ?  
O226 W59 O224 98.8(11) . . ?  
O226 W59 O225 99.6(11) . . ?  
O224 W59 O225 85.6(11) . . ?  
O226 W59 O218 101.7(10) . . ?  
O224 W59 O218 159.0(10) . . ?  
O225 W59 O218 95.2(10) . . ?  
O226 W59 O219 97.8(10) . . ?  
O224 W59 O219 86.0(10) . . ?  
O225 W59 O219 161.6(9) . . ?  
O218 W59 O219 87.0(9) . . ?  
O226 W59 O214 169.7(10) . . ?  
O224 W59 O214 85.1(9) . . ?  
O225 W59 O214 90.2(9) . . ?  
O218 W59 O214 73.9(8) . . ?  
O219 W59 O214 72.9(7) . . ?  
O228 W60 O217 99.1(12) . . ?  
O228 W60 O222 100.5(11) . . ?  
O217 W60 O222 93.1(10) . . ?  
O228 W60 O225 98.4(11) . . ?  
O217 W60 O225 88.6(10) . . ?  
O222 W60 O225 160.5(10) . . ?  
O228 W60 O223 103.7(12) . . ?  
O217 W60 O223 156.1(12) . . ?  
O222 W60 O223 89.7(10) . . ?  
O225 W60 O223 81.1(10) . . ?  
O228 W60 O216 170.0(11) . . ?  
O217 W60 O216 73.6(10) . . ?  
O222 W60 O216 73.5(9) . . ?  
O225 W60 O216 88.4(9) . . ?  
O223 W60 O216 84.5(9) . . ?  
O190 W61 O169 100.0(8) . . ?  
O190 W61 O307 95.1(8) . . ?  
O169 W61 O307 98.0(8) . . ?  
O190 W61 O166 102.2(8) . . ?  
O169 W61 O166 89.0(8) . . ?  
O307 W61 O166 160.0(8) . . ?  
O190 W61 O308 163.1(7) . . ?  
O169 W61 O308 95.9(8) . . ?  
O307 W61 O308 76.7(7) . . ?  
O166 W61 O308 84.0(7) . . ?  
O190 W61 O163 86.1(8) . . ?  
O169 W61 O163 164.8(8) . . ?  
O307 W61 O163 95.3(7) . . ?  
O166 W61 O163 76.1(8) . . ?  
O308 W61 O163 80.0(7) . . ?  
O190 W61 W62 135.0(6) . . ?  
O169 W61 W62 96.0(6) . . ?  
O307 W61 W62 40.8(5) . . ?  
O166 W61 W62 120.1(5) . . ?  
O308 W61 W62 36.1(5) . . ?  
O163 W61 W62 89.3(5) . . ?

O190 W61 Na16 149.1(6) . 2\_546 ?  
O169 W61 Na16 51.5(6) . 2\_546 ?  
O307 W61 Na16 100.1(5) . 2\_546 ?  
O166 W61 Na16 69.7(6) . 2\_546 ?  
O308 W61 Na16 47.9(5) . 2\_546 ?  
O163 W61 Na16 118.7(5) . 2\_546 ?  
W62 W61 Na16 67.94(12) . 2\_546 ?  
O190 W61 Cs3 72.3(6) . . ?  
O169 W61 Cs3 145.0(6) . . ?  
O307 W61 Cs3 50.5(5) . . ?  
O166 W61 Cs3 125.9(6) . . ?  
O308 W61 Cs3 91.3(5) . . ?  
O163 W61 Cs3 50.1(5) . . ?  
W62 W61 Cs3 70.65(4) . . ?  
Na16 W61 Cs3 137.25(12) 2\_546 . ?  
O306 W62 O262 101.4(9) . . ?  
O306 W62 O308 103.3(9) . . ?  
O262 W62 O308 91.0(8) . . ?  
O306 W62 O233 93.9(9) . . ?  
O262 W62 O233 103.2(8) . . ?  
O308 W62 O233 155.1(8) . . ?  
O306 W62 O307 92.7(8) . . ?  
O262 W62 O307 162.5(7) . . ?  
O308 W62 O307 75.5(7) . . ?  
O233 W62 O307 86.0(7) . . ?  
O306 W62 O234 171.5(9) . . ?  
O262 W62 O234 84.6(8) . . ?  
O308 W62 O234 82.4(7) . . ?  
O233 W62 O234 78.7(7) . . ?  
O307 W62 O234 82.6(6) . . ?  
O306 W62 W61 102.5(6) . . ?  
O262 W62 W61 129.7(6) . . ?  
O308 W62 W61 40.4(5) . . ?  
O233 W62 W61 118.5(5) . . ?  
O307 W62 W61 35.2(5) . . ?  
O234 W62 W61 77.7(4) . . ?  
O306 W62 Cs3 45.4(6) . . ?  
O262 W62 Cs3 145.3(7) . . ?  
O308 W62 Cs3 88.6(5) . . ?  
O233 W62 Cs3 91.0(5) . . ?  
O307 W62 Cs3 47.3(5) . . ?  
O234 W62 Cs3 129.6(4) . . ?  
W61 W62 Cs3 64.41(4) . . ?  
O248 W63 O233 103.3(9) . . ?  
O248 W63 O254 96.2(10) . . ?  
O233 W63 O254 160.4(8) . . ?  
O248 W63 O247 101.3(9) . . ?  
O233 W63 O247 89.2(9) . . ?  
O254 W63 O247 87.7(9) . . ?  
O248 W63 O309 98.3(9) . . ?  
O233 W63 O309 88.9(8) . . ?  
O254 W63 O309 87.5(9) . . ?  
O247 W63 O309 160.2(8) . . ?  
O248 W63 O363 165.8(9) . . ?  
O233 W63 O363 89.6(8) . . ?  
O254 W63 O363 71.0(9) . . ?  
O247 W63 O363 72.8(8) . . ?  
O309 W63 O363 87.4(7) . . ?  
O231 W64 O234 102.9(9) . . ?  
O231 W64 O309 106.0(8) . . ?  
O234 W64 O309 91.6(8) . . ?  
O231 W64 O235 94.1(8) . . ?  
O234 W64 O235 91.5(8) . . ?  
O309 W64 O235 158.4(8) . . ?

O231 W64 O249 92.5 (9) . . ?  
O234 W64 O249 164.6 (8) . . ?  
O309 W64 O249 85.4 (8) . . ?  
O235 W64 O249 86.0 (8) . . ?  
O231 W64 O361 159.9 (8) . . ?  
O234 W64 O361 92.3 (7) . . ?  
O309 W64 O361 86.4 (7) . . ?  
O235 W64 O361 72.1 (7) . . ?  
O249 W64 O361 72.5 (8) . . ?  
O237 W65 O236 105.3 (9) . . ?  
O237 W65 O238 100.3 (9) . . ?  
O236 W65 O238 93.6 (9) . . ?  
O237 W65 O235 98.6 (8) . . ?  
O236 W65 O235 93.1 (8) . . ?  
O238 W65 O235 157.5 (8) . . ?  
O237 W65 O250 92.3 (9) . . ?  
O236 W65 O250 162.4 (8) . . ?  
O238 W65 O250 84.8 (9) . . ?  
O235 W65 O250 82.4 (8) . . ?  
O237 W65 O361 164.7 (9) . . ?  
O236 W65 O361 88.8 (8) . . ?  
O238 W65 O361 84.7 (8) . . ?  
O235 W65 O361 74.0 (7) . . ?  
O250 W65 O361 73.6 (8) . . ?  
O240 W66 O239 104.8 (11) . . ?  
O240 W66 O238 102.2 (9) . . ?  
O239 W66 O238 90.3 (9) . . ?  
O240 W66 O241 96.5 (9) . . ?  
O239 W66 O241 98.1 (9) . . ?  
O238 W66 O241 156.8 (9) . . ?  
O240 W66 O251 94.4 (10) . . ?  
O239 W66 O251 160.4 (9) . . ?  
O238 W66 O251 81.8 (9) . . ?  
O241 W66 O251 83.3 (9) . . ?  
O240 W66 O362 163.8 (9) . . ?  
O239 W66 O362 89.2 (9) . . ?  
O238 W66 O362 85.5 (8) . . ?  
O241 W66 O362 73.1 (8) . . ?  
O251 W66 O362 72.4 (8) . . ?  
O243 W67 O242 100.1 (11) . . ?  
O243 W67 O241 106.4 (10) . . ?  
O242 W67 O241 97.0 (9) . . ?  
O243 W67 O244 102.5 (11) . . ?  
O242 W67 O244 88.4 (9) . . ?  
O241 W67 O244 149.1 (9) . . ?  
O243 W67 O252 93.7 (11) . . ?  
O242 W67 O252 164.7 (9) . . ?  
O241 W67 O252 85.1 (9) . . ?  
O244 W67 O252 82.3 (9) . . ?  
O243 W67 O362 165.0 (10) . . ?  
O242 W67 O362 94.5 (7) . . ?  
O241 W67 O362 68.1 (7) . . ?  
O244 W67 O362 81.2 (8) . . ?  
O252 W67 O362 72.2 (8) . . ?  
O246 W68 O245 106.8 (11) . . ?  
O246 W68 O253 100.0 (11) . . ?  
O245 W68 O253 153.2 (9) . . ?  
O246 W68 O244 104.0 (10) . . ?  
O245 W68 O244 86.5 (9) . . ?  
O253 W68 O244 86.0 (9) . . ?  
O246 W68 O247 95.3 (10) . . ?  
O245 W68 O247 88.2 (9) . . ?  
O253 W68 O247 90.5 (9) . . ?  
O244 W68 O247 160.7 (8) . . ?

O246 W68 O363 165.0(9) . . ?  
O245 W68 O363 81.7(9) . . ?  
O253 W68 O363 72.4(9) . . ?  
O244 W68 O363 88.7(8) . . ?  
O247 W68 O363 72.2(8) . . ?  
O260 W69 O257 101.6(11) . . ?  
O260 W69 O255 100.1(11) . . ?  
O257 W69 O255 88.5(10) . . ?  
O260 W69 O254 99.5(11) . . ?  
O257 W69 O254 158.3(11) . . ?  
O255 W69 O254 92.9(9) . . ?  
O260 W69 O253 98.3(11) . . ?  
O257 W69 O253 87.9(9) . . ?  
O255 W69 O253 161.7(11) . . ?  
O254 W69 O253 84.0(9) . . ?  
O260 W69 O363 166.5(10) . . ?  
O257 W69 O363 87.2(9) . . ?  
O255 W69 O363 90.4(9) . . ?  
O254 W69 O363 71.2(9) . . ?  
O253 W69 O363 71.5(9) . . ?  
O258 W70 O251 101.3(12) . . ?  
O258 W70 O256 102.3(11) . . ?  
O251 W70 O256 86.9(10) . . ?  
O258 W70 O252 100.8(11) . . ?  
O251 W70 O252 93.3(10) . . ?  
O256 W70 O252 156.4(10) . . ?  
O258 W70 O257 101.4(11) . . ?  
O251 W70 O257 156.3(10) . . ?  
O256 W70 O257 81.8(9) . . ?  
O252 W70 O257 89.0(9) . . ?  
O258 W70 O362 171.8(10) . . ?  
O251 W70 O362 72.6(9) . . ?  
O256 W70 O362 83.2(8) . . ?  
O252 W70 O362 74.4(8) . . ?  
O257 W70 O362 85.4(8) . . ?  
O259 W71 O249 99.9(11) . . ?  
O259 W71 O250 99.9(11) . . ?  
O249 W71 O250 91.6(9) . . ?  
O259 W71 O256 104.2(11) . . ?  
O249 W71 O256 154.6(9) . . ?  
O250 W71 O256 92.0(9) . . ?  
O259 W71 O255 99.9(11) . . ?  
O249 W71 O255 85.6(9) . . ?  
O250 W71 O255 160.2(10) . . ?  
O256 W71 O255 82.6(9) . . ?  
O259 W71 O361 171.1(10) . . ?  
O249 W71 O361 74.4(8) . . ?  
O250 W71 O361 73.8(8) . . ?  
O256 W71 O361 82.6(8) . . ?  
O255 W71 O361 86.6(9) . . ?  
O261 W72 O302 101.1(9) . . ?  
O261 W72 O245 98.6(9) . . ?  
O302 W72 O245 93.5(9) . . ?  
O261 W72 O284 92.8(9) . . ?  
O302 W72 O284 101.1(9) . . ?  
O245 W72 O284 159.4(9) . . ?  
O261 W72 O281 168.1(9) . . ?  
O302 W72 O281 89.7(9) . . ?  
O245 W72 O281 85.5(9) . . ?  
O284 W72 O281 80.1(9) . . ?  
O261 W72 O242 86.0(8) . . ?  
O302 W72 O242 170.5(9) . . ?  
O245 W72 O242 79.1(8) . . ?  
O284 W72 O242 84.6(8) . . ?

O281 W72 O242 83.8 (8) . . ?  
O282 W73 O281 103.6 (12) . . ?  
O282 W73 O283 105.3 (11) . . ?  
O281 W73 O283 88.5 (10) . . ?  
O282 W73 O280 101.5 (11) . . ?  
O281 W73 O280 93.4 (9) . . ?  
O283 W73 O280 151.9 (10) . . ?  
O282 W73 O291 93.3 (11) . . ?  
O281 W73 O291 162.8 (10) . . ?  
O283 W73 O291 84.0 (9) . . ?  
O280 W73 O291 86.2 (8) . . ?  
O282 W73 O289 164.4 (10) . . ?  
O281 W73 O289 91.3 (9) . . ?  
O283 W73 O289 79.3 (9) . . ?  
O280 W73 O289 72.6 (8) . . ?  
O291 W73 O289 72.1 (8) . . ?  
O278 W74 O279 103.8 (9) . . ?  
O278 W74 O277 94.3 (9) . . ?  
O279 W74 O277 100.0 (9) . . ?  
O278 W74 O280 94.2 (8) . . ?  
O279 W74 O280 98.5 (9) . . ?  
O277 W74 O280 157.1 (8) . . ?  
O278 W74 O290 160.9 (8) . . ?  
O279 W74 O290 95.3 (9) . . ?  
O277 W74 O290 81.4 (8) . . ?  
O280 W74 O290 83.7 (8) . . ?  
O278 W74 O289 88.0 (8) . . ?  
O279 W74 O289 167.4 (8) . . ?  
O277 W74 O289 83.3 (8) . . ?  
O280 W74 O289 75.8 (8) . . ?  
O290 W74 O289 73.0 (7) . . ?  
O276 W75 O275 103.3 (8) . . ?  
O276 W75 O274 97.5 (8) . . ?  
O275 W75 O274 93.2 (8) . . ?  
O276 W75 O277 102.6 (8) . . ?  
O275 W75 O277 93.0 (8) . . ?  
O274 W75 O277 157.0 (7) . . ?  
O276 W75 O294 96.7 (8) . . ?  
O275 W75 O294 159.9 (8) . . ?  
O274 W75 O294 84.2 (8) . . ?  
O277 W75 O294 82.4 (8) . . ?  
O276 W75 O288 166.2 (9) . . ?  
O275 W75 O288 87.8 (8) . . ?  
O274 W75 O288 73.4 (7) . . ?  
O277 W75 O288 84.7 (7) . . ?  
O294 W75 O288 72.4 (8) . . ?  
O273 W76 O271 104.1 (13) . . ?  
O273 W76 O270 106.6 (12) . . ?  
O271 W76 O270 95.6 (11) . . ?  
O273 W76 O274 99.1 (11) . . ?  
O271 W76 O274 89.3 (10) . . ?  
O270 W76 O274 151.7 (9) . . ?  
O273 W76 O295 92.7 (11) . . ?  
O271 W76 O295 162.7 (11) . . ?  
O270 W76 O295 83.1 (9) . . ?  
O274 W76 O295 84.0 (8) . . ?  
O273 W76 O288 162.3 (10) . . ?  
O271 W76 O288 91.6 (10) . . ?  
O270 W76 O288 79.3 (8) . . ?  
O274 W76 O288 72.7 (7) . . ?  
O295 W76 O288 71.1 (8) . . ?  
O269 W77 O268 104.8 (11) . . ?  
O269 W77 O270 105.8 (12) . . ?  
O268 W77 O270 93.4 (10) . . ?

O269 W77 O286 97.7(12) . . ?  
O268 W77 O286 89.4(10) . . ?  
O270 W77 O286 154.7(9) . . ?  
O269 W77 O293 95.5(11) . . ?  
O268 W77 O293 159.2(10) . . ?  
O270 W77 O293 84.6(9) . . ?  
O286 W77 O293 83.9(10) . . ?  
O269 W77 O287 164.3(10) . . ?  
O268 W77 O287 87.3(9) . . ?  
O270 W77 O287 82.9(9) . . ?  
O286 W77 O287 72.1(9) . . ?  
O293 W77 O287 71.9(9) . . ?  
O285 W78 O283 105.0(12) . . ?  
O285 W78 O286 96.4(12) . . ?  
O283 W78 O286 158.6(10) . . ?  
O285 W78 O284 107.0(11) . . ?  
O283 W78 O284 86.1(9) . . ?  
O286 W78 O284 89.0(9) . . ?  
O285 W78 O292 98.1(11) . . ?  
O283 W78 O292 85.6(10) . . ?  
O286 W78 O292 90.1(10) . . ?  
O284 W78 O292 154.7(9) . . ?  
O285 W78 O287 165.7(11) . . ?  
O283 W78 O287 87.0(9) . . ?  
O286 W78 O287 71.7(9) . . ?  
O284 W78 O287 81.2(8) . . ?  
O292 W78 O287 74.6(9) . . ?  
O299 W79 O298 102.1(10) . . ?  
O299 W79 O297 99.4(11) . . ?  
O298 W79 O297 87.1(10) . . ?  
O299 W79 O293 98.5(11) . . ?  
O298 W79 O293 159.0(10) . . ?  
O297 W79 O293 93.4(10) . . ?  
O299 W79 O292 99.4(10) . . ?  
O298 W79 O292 85.6(10) . . ?  
O297 W79 O292 160.9(10) . . ?  
O293 W79 O292 87.2(10) . . ?  
O299 W79 O287 169.5(9) . . ?  
O298 W79 O287 86.2(8) . . ?  
O297 W79 O287 87.3(9) . . ?  
O293 W79 O287 72.8(9) . . ?  
O292 W79 O287 74.6(8) . . ?  
O301 W80 O291 97.3(10) . . ?  
O301 W80 O290 100.1(9) . . ?  
O291 W80 O290 91.5(9) . . ?  
O301 W80 O296 100.5(10) . . ?  
O291 W80 O296 161.4(9) . . ?  
O290 W80 O296 90.8(9) . . ?  
O301 W80 O298 101.6(9) . . ?  
O291 W80 O298 88.0(9) . . ?  
O290 W80 O298 158.1(9) . . ?  
O296 W80 O298 83.1(9) . . ?  
O301 W80 O289 172.0(9) . . ?  
O291 W80 O289 77.1(8) . . ?  
O290 W80 O289 74.6(8) . . ?  
O296 W80 O289 85.8(8) . . ?  
O298 W80 O289 84.0(8) . . ?  
O300 W81 O295 99.4(10) . . ?  
O300 W81 O294 103.4(9) . . ?  
O295 W81 O294 93.0(9) . . ?  
O300 W81 O296 99.0(10) . . ?  
O295 W81 O296 160.3(10) . . ?  
O294 W81 O296 89.5(9) . . ?  
O300 W81 O297 97.5(10) . . ?



O295 W81 O297 88.9(10) . . ?  
O294 W81 O297 158.4(10) . . ?  
O296 W81 O297 81.8(9) . . ?  
O300 W81 O288 173.9(9) . . ?  
O295 W81 O288 75.1(9) . . ?  
O294 W81 O288 74.5(8) . . ?  
O296 W81 O288 86.8(8) . . ?  
O297 W81 O288 85.2(8) . . ?  
O272 W82 O265 112.4(10) . . ?  
O272 W82 O268 118.4(10) . . ?  
O265 W82 O268 91.7(9) . . ?  
O272 W82 O266 86(2) . . ?  
O265 W82 O266 96(2) . . ?  
O268 W82 O266 149(2) . . ?  
O272 W82 O271 78.4(10) . . ?  
O265 W82 O271 169.1(9) . . ?  
O268 W82 O271 84.2(9) . . ?  
O266 W82 O271 83(2) . . ?  
O272 W82 O267 160.8(15) . . ?  
O265 W82 O267 79.2(14) . . ?  
O268 W82 O267 74.8(13) . . ?  
O266 W82 O267 78(2) . . ?  
O271 W82 O267 89.9(14) . . ?

\_diffn\_measured\_fraction\_theta\_max 0.999  
\_diffn\_reflns\_theta\_full 25.68  
\_diffn\_measured\_fraction\_theta\_full 0.999  
\_refine\_diff\_density\_max 5.639  
\_refine\_diff\_density\_min -6.255  
\_refine\_diff\_density\_rms 0.475
